# Supplementary material for: Torsional barriers of substituted biphenyls calculated using density functional theory: a benchmarking study
Source: Royal Society of Chemistry journal article supplement (doi:10.1039/c3ob26704k), 2013-01-01
Supplement: c3ob26704k.pdf [file c3ob26704k.pdf]

## Torsional barriers of substituted biphenyls calculated using density functional theory: a benchmarking study

Eric Masson\*

*Department of Chemistry and Biochemistry, Ohio University, Athens, OH 45701, USA; e-mail: masson@ohio.edu*

### Supporting Information

|                                                                                                                                                                                                                                                                                              |   |
|----------------------------------------------------------------------------------------------------------------------------------------------------------------------------------------------------------------------------------------------------------------------------------------------|---|
| <b>Table 1</b> Activation parameters for the torsional isomerization of biphenyls <b>1 – 8</b> calculated at the B97–D/def2–TZVPP level and deviations from experimental data. ....                                                                                                          | 2 |
| <b>Table 2</b> Activation parameters for the torsional isomerization of biphenyls <b>1 – 8</b> calculated at the TPSS–D3/def2–TZVPP level and deviations from experimental data. ....                                                                                                        | 3 |
| <b>Table 3a</b> Deviations from experimentally determined Gibbs energies of activation, calculated with dispersion-corrected and uncorrected GGAs, meta-GGAs and hybrids. ....                                                                                                               | 4 |
| <b>Table 3b</b> Deviations from experimentally determined Gibbs energies of activation, calculated with dispersion-corrected and uncorrected GGAs, hybrids and double hybrids. ....                                                                                                          | 4 |
| <b>Table 4</b> Structures and Cartesian coordinates of ground and transition states of biphenyls <b>1 – 8</b> , optimized at the B3LYP–D level. Energies obtained after optimization with the B3LYP–D hybrid (top value), B97–D GGA (middle value) and TPSS–D3 meta-GGA (bottom value). .... | 5 |

**Table 1** Activation parameters for the torsional isomerization of biphenyls **1** – **8** calculated at the B97–D/def2–TZVPP level,<sup>a</sup> and deviations from experimental data.

|                       | R <sup>1</sup>   | R <sup>2</sup>                    | R <sup>3</sup>                                | R <sup>4</sup>   | T <sup>b</sup>    | ΔE <sup>c</sup> | ΔH <sup>d</sup> | ΔS <sup>e</sup> | ΔG <sup>f</sup> | ΔG <sup>ref,f,g</sup> | ΔΔG <sup>h</sup> | Ref. |
|-----------------------|------------------|-----------------------------------|-----------------------------------------------|------------------|-------------------|-----------------|-----------------|-----------------|-----------------|-----------------------|------------------|------|
| <b>1a</b>             | <sup>i</sup> Pr  | CH <sub>3</sub>                   |                                               |                  | –120 <sup>i</sup> | 7.0             | 7.0             | –3.1            | 7.5             | 7.4                   | 0.1              | 2a   |
| <b>1b</b>             | <sup>i</sup> Pr  | C <sub>2</sub> H <sub>5</sub>     |                                               |                  | –95 <sup>i</sup>  | 7.9             | 7.9             | –3.4            | 8.5             | 8.7                   | –0.2             | 2a   |
| <b>1c</b>             | <sup>i</sup> Pr  | <sup>i</sup> Pr                   |                                               |                  | –45 <sup>i</sup>  | 10.4            | 10.3            | –4.3            | 11.3            | 11.1                  | 0.2              | 2a   |
| <b>1d</b>             | <sup>i</sup> Pr  | <sup>i</sup> Bu                   |                                               |                  | 38 <sup>i</sup>   | 13.9            | 13.8            | –5.1            | 15.4            | 15.4                  | 0.0              | 2a   |
| <b>1e</b>             | <sup>i</sup> Pr  | Cl                                |                                               |                  | –118 <sup>i</sup> | 7.3             | 7.1             | –3.7            | 7.7             | 7.7                   | 0.0              | 2a   |
| <b>1f</b>             | <sup>i</sup> Pr  | Br                                |                                               |                  | –95 <sup>i</sup>  | 8.3             | 8.1             | –3.7            | 8.7             | 8.8                   | 0.0              | 2a   |
| <b>1g</b>             | <sup>i</sup> Pr  | I                                 |                                               |                  | –70 <sup>i</sup>  | 9.6             | 9.3             | –3.9            | 10.1            | 9.9                   | 0.2              | 2a   |
| <b>1h</b>             | Si               | C≡CH                              |                                               |                  | –150              | 5.5             | 5.3             | –3.7            | 5.8             | 6.0                   | –0.2             | 3a   |
| <b>1i</b>             | Si               | N(CH <sub>3</sub> ) <sub>2</sub>  |                                               |                  | –133              | 7.5             | 7.3             | –2.5            | 7.6             | 6.9                   | 0.7              | 3b   |
| <b>2a</b>             | H                | CF <sub>3</sub>                   | CF <sub>3</sub>                               | H                | 64 <sup>i</sup>   | 25.1            | 24.7            | –8.1            | 27.4            | 26.2                  | 1.2              | 8c   |
| <b>2b</b>             | H                | <sup>i</sup> Pr                   | CF <sub>3</sub>                               | H                | 78 <sup>i</sup>   | 24.9            | 24.6            | –7.1            | 27.1            | 26.8                  | 0.3              | 8c   |
| <b>2c</b>             | H                | <sup>i</sup> Pr                   | <sup>i</sup> Pr                               | H                | 83 <sup>i</sup>   | 25.4            | 24.9            | –4.6            | 26.5            | 27.4                  | –0.9             | 8c   |
| <b>2d</b>             | H                | <sup>i</sup> Bu                   | <sup>i</sup> Pr                               | H                | 160 <sup>i</sup>  | 30.9            | 30.4            | –5.5            | 32.8            | 32.7                  | 0.1              | 8c   |
| <b>2e</b>             | H                | OCH <sub>3</sub>                  | COOH                                          | NO <sub>2</sub>  | 24                | 20.3            | 19.5            | –7.2            | 21.7            | 21.9                  | –0.2             | 7    |
| <b>2f<sup>j</sup></b> | H                | N(CH <sub>3</sub> ) <sub>2</sub>  | N(CH <sub>3</sub> ) <sub>3</sub> <sup>+</sup> | H                | 90                | 27.3            | 26.8            | –4.8            | 28.6            | 28.9                  | –0.3             | 11a  |
| <b>2g<sup>j</sup></b> | OCH <sub>3</sub> | COO <sup>–</sup>                  | COO <sup>–</sup>                              | OCH <sub>3</sub> | 90                | 25.1            | 24.2            | –8.9            | 27.4            | 29.8                  | –2.4             | 11b  |
| <b>2h</b>             | OCH <sub>3</sub> | CONH <sub>2</sub>                 | CONH <sub>2</sub>                             | OCH <sub>3</sub> | 109               | 30.6            | 29.2            | –10.1           | 33.1            | 32.2                  | 0.2              | 11c  |
| <b>2i</b>             | OCH <sub>3</sub> | COOCH <sub>3</sub>                | COOCH <sub>3</sub>                            | OCH <sub>3</sub> | 100               | 27.7            | 27.4            | –6.6            | 29.8            | 30.4                  | –0.6             | 11c  |
| <b>3a</b>             | <sup>i</sup> Pr  | OCH <sub>3</sub>                  | H                                             | H                | 86                | 18.2            | 18.0            | –4.3            | 19.5            | 19.2                  | 0.3              | 5a   |
| <b>3b</b>             | <sup>i</sup> Pr  | OCH <sub>3</sub>                  | OCH <sub>3</sub>                              | OCH <sub>3</sub> | 61                | 16.9            | 16.8            | –4.4            | 18.2            | 17.9                  | 0.3              | 5a   |
| <b>3c</b>             | Br               | Br                                | COOH                                          | COOH             | –8 <sup>i</sup>   | 19.3            | 19.0            | –6.0            | 20.6            | 19.9                  | 0.7              | 11d  |
| <b>4a</b>             | CH <sub>3</sub>  | Br                                | H                                             |                  | 78 <sup>i</sup>   | 18.3            | 18.1            | –5.4            | 20.0            | 20.0                  | 0.0              | 5b   |
| <b>4b</b>             | CH <sub>3</sub>  | CF <sub>3</sub>                   | H                                             |                  | 134 <sup>i</sup>  | 20.7            | 20.5            | –7.3            | 23.5            | 23.3                  | 0.2              | 5b   |
| <b>4c</b>             | CH <sub>3</sub>  | Cl                                | H                                             |                  | 62 <sup>i</sup>   | 17.0            | 16.8            | –5.7            | 18.7            | 18.7                  | 0.0              | 5b   |
| <b>4d</b>             | CH <sub>3</sub>  | Cl                                | NO <sub>2</sub>                               |                  | 54 <sup>i</sup>   | 16.3            | 16.1            | –5.5            | 17.9            | 18.3                  | –0.4             | 5b   |
| <b>4e</b>             | CH <sub>3</sub>  | CN                                | H                                             |                  | –24 <sup>i</sup>  | 12.1            | 12.0            | –5.0            | 13.3            | 14.1                  | –0.8             | 5b   |
| <b>4f</b>             | CH <sub>3</sub>  | COCH <sub>3</sub>                 | H                                             |                  | 2 <sup>i</sup>    | 15.0            | 14.6            | –4.4            | 15.8            | 15.5                  | 0.3              | 5b   |
| <b>4g</b>             | CH <sub>3</sub>  | F                                 | H                                             |                  | –32 <sup>i</sup>  | 11.2            | 11.1            | –5.0            | 12.3            | 12.4                  | –0.1             | 5b   |
| <b>4h</b>             | CH <sub>3</sub>  | F                                 | NO <sub>2</sub>                               |                  | –45 <sup>i</sup>  | 10.7            | 10.6            | –4.5            | 11.7            | 11.6                  | 0.0              | 5b   |
| <b>4i</b>             | CH <sub>3</sub>  | I                                 | H                                             |                  | 112 <sup>i</sup>  | 19.9            | 19.6            | –5.2            | 21.6            | 21.5                  | 0.1              | 5b   |
| <b>4j</b>             | CH <sub>3</sub>  | I                                 | H                                             |                  | 39 <sup>i</sup>   | 15.9            | 15.5            | –4.2            | 16.8            | 16.7                  | 0.1              | 5b   |
| <b>4k</b>             | CH <sub>3</sub>  | <sup>i</sup> Pr                   | H                                             |                  | 165 <sup>i</sup>  | 21.0            | 20.7            | –5.6            | 23.1            | 24.1                  | –0.9             | 5b   |
| <b>4l</b>             | CH <sub>3</sub>  | NH <sub>2</sub>                   | H                                             |                  | 69 <sup>i</sup>   | 17.5            | 17.3            | –6.2            | 19.4            | 19.3                  | 0.1              | 5b   |
| <b>4m</b>             | CH <sub>3</sub>  | N(CH <sub>3</sub> ) <sub>2</sub>  | H                                             |                  | 46 <sup>i</sup>   | 16.0            | 15.7            | –5.8            | 17.5            | 17.1                  | 0.4              | 5b   |
| <b>4n</b>             | CH <sub>3</sub>  | NO <sub>2</sub>                   | H                                             |                  | 16 <sup>i</sup>   | 14.6            | 14.4            | –3.3            | 15.3            | 16.4                  | –1.1             | 5b   |
| <b>4o</b>             | CH <sub>3</sub>  | OCH <sub>3</sub>                  | H                                             |                  | –3 <sup>i</sup>   | 13.5            | 13.4            | –4.7            | 14.7            | 14.7                  | 0.0              | 5b   |
| <b>4p</b>             | CH <sub>3</sub>  | Ph                                | H                                             |                  | 29 <sup>i</sup>   | 15.4            | 15.2            | –4.1            | 16.4            | 16.9                  | –0.4             | 5b   |
| <b>4q</b>             | CH <sub>3</sub>  | SH                                | H                                             |                  | 68 <sup>i</sup>   | 18.4            | 18.2            | –5.6            | 20.1            | 19.4                  | 0.7              | 5b   |
| <b>4r</b>             | CH <sub>3</sub>  | Si(CH <sub>3</sub> ) <sub>3</sub> | H                                             |                  | 123 <sup>i</sup>  | 19.1            | 18.9            | –5.6            | 21.1            | 22.0                  | –0.9             | 5b   |
| <b>5a</b>             | H                |                                   |                                               |                  | 29 <sup>i</sup>   | 23.6            | 23.0            | –6.2            | 24.9            | 23.4                  | 1.5              | 11e  |
| <b>5b</b>             | I                |                                   |                                               |                  | 90 <sup>i</sup>   | 30.1            | 29.1            | –9.2            | 32.5            | 30.2                  | 2.3              | 11e  |
| <b>6<sup>j</sup></b>  |                  |                                   |                                               |                  | 81 <sup>i</sup>   | 22.4            | 21.5            | –9.2            | 24.8            | 27.2                  | –2.4             | 11f  |
| <b>7a</b>             | Cl               | H                                 | H                                             | Cl               | 300               | 41.7            | 40.1            | –9.6            | 45.7            | 44.0                  | 1.7              | 9b   |
| <b>7b</b>             | Cl               | Cl                                | Cl                                            | H                | 300               | 43.1            | 41.5            | –9.4            | 46.9            | 45.2                  | 1.7              | 9b   |
| <b>7c</b>             | Cl               | H                                 | Cl                                            | Cl               | 300               | 41.0            | 39.5            | –9.8            | 45.1            | 44.0                  | 1.1              | 9b   |
| <b>8</b>              |                  |                                   |                                               |                  | 44                | 18.0            | 17.3            | –1.9            | 17.9            | 16.1                  | 1.9              | 5c   |

<sup>a</sup> Both structure optimization and vibrational analysis were carried out at this level of theory. <sup>b</sup> in °C; enthalpies and Gibbs energies of activation are calculated at this temperature. <sup>c</sup> Electronic contribution to the torsional barriers [kcal/mol]. <sup>d</sup> Enthalpy of activation at temperature *T* [kcal/mol]. <sup>e</sup> Entropy of activation at temperature *T* [cal/mol·K]. <sup>f</sup> Gibbs energy of activation at temperature *T* [kcal/mol]. <sup>g</sup> Experimental data. <sup>h</sup> Deviation from experimental data [kcal/mol]. <sup>i</sup> Mean value of a reported temperature interval. <sup>j</sup> Solvation term added to energy, enthalpy and Gibbs energy of activation.

**Table 2** Activation parameters for the torsional isomerization of biphenyls **1** – **8** calculated at the TPSS–D3/def2–TZVPP level,<sup>a</sup> and deviations from experimental data.

|                       | R <sup>1</sup>   | R <sup>2</sup>                    | R <sup>3</sup>                                | R <sup>4</sup>   | T <sup>b</sup>    | ΔE <sup>c</sup> | ΔH <sup>d</sup> | ΔS <sup>e</sup> | ΔG <sup>f</sup> | ΔG <sup>ref,f,g</sup> | ΔΔG <sup>h</sup> | Ref. |
|-----------------------|------------------|-----------------------------------|-----------------------------------------------|------------------|-------------------|-----------------|-----------------|-----------------|-----------------|-----------------------|------------------|------|
| <b>1a</b>             | <sup>i</sup> Pr  | CH <sub>3</sub>                   |                                               |                  | –120 <sup>i</sup> | 6.5             | 6.5             | –5.9            | 7.5             | 7.4                   | 0.1              | 2a   |
| <b>1b</b>             | <sup>i</sup> Pr  | C <sub>2</sub> H <sub>5</sub>     |                                               |                  | –95 <sup>i</sup>  | 7.3             | 7.3             | –5.6            | 8.3             | 8.7                   | –0.4             | 2a   |
| <b>1c</b>             | <sup>i</sup> Pr  | <sup>i</sup> Pr                   |                                               |                  | –45 <sup>i</sup>  | 9.7             | 9.6             | –8.0            | 11.4            | 11.1                  | 0.3              | 2a   |
| <b>1d</b>             | <sup>i</sup> Pr  | <sup>i</sup> Bu                   |                                               |                  | 38 <sup>i</sup>   | 13.2            | 13.0            | –10.1           | 16.2            | 15.4                  | 0.8              | 2a   |
| <b>1e</b>             | <sup>i</sup> Pr  | Cl                                |                                               |                  | –118 <sup>i</sup> | 6.4             | 6.2             | –6.2            | 7.2             | 7.7                   | –0.5             | 2a   |
| <b>1f</b>             | <sup>i</sup> Pr  | Br                                |                                               |                  | –95 <sup>i</sup>  | 7.4             | 7.1             | –5.6            | 8.1             | 8.8                   | –0.6             | 2a   |
| <b>1g</b>             | <sup>i</sup> Pr  | I                                 |                                               |                  | –70 <sup>i</sup>  | 8.6             | 8.2             | –6.5            | 9.5             | 9.9                   | –0.4             | 2a   |
| <b>1h</b>             | Si               | C≡CH                              |                                               |                  | –150              | 5.2             | 5.0             | –5.0            | 5.6             | 6.0                   | –0.4             | 3a   |
| <b>1i</b>             | Si               | N(CH <sub>3</sub> ) <sub>2</sub>  |                                               |                  | –133              | 7.1             | 6.6             | –10.3           | 8.0             | 6.9                   | 1.1              | 3b   |
| <b>2a</b>             | H                | CF <sub>3</sub>                   | CF <sub>3</sub>                               | H                | 64 <sup>i</sup>   | 22.3            | 21.9            | –9.0            | 24.9            | 26.2                  | –1.3             | 8c   |
| <b>2b</b>             | H                | CF <sub>3</sub>                   | CF <sub>3</sub>                               | H                | 78 <sup>i</sup>   | 23.3            | 23.0            | –10.6           | 26.7            | 26.8                  | –0.1             | 8c   |
| <b>2c</b>             | H                | <sup>i</sup> Pr                   | <sup>i</sup> Pr                               | H                | 83 <sup>i</sup>   | 24.5            | 24.2            | –11.1           | 28.1            | 27.4                  | 0.8              | 8c   |
| <b>2d</b>             | H                | <sup>i</sup> Bu                   | <sup>i</sup> Pr                               | H                | 160 <sup>i</sup>  | 29.2            | 28.8            | –9.1            | 32.7            | 32.7                  | 0.0              | 8c   |
| <b>2e</b>             | H                | OCH <sub>3</sub>                  | COOH                                          | NO <sub>2</sub>  | 24                | 19.3            | 18.5            | –8.0            | 20.9            | 21.9                  | –1.0             | 7    |
| <b>2f<sup>j</sup></b> | H                | N(CH <sub>3</sub> ) <sub>2</sub>  | N(CH <sub>3</sub> ) <sub>3</sub> <sup>+</sup> | H                | 90                | 26.6            | 26.0            | –4.3            | 27.5            | 28.9                  | –1.4             | 11a  |
| <b>2g<sup>j</sup></b> | OCH <sub>3</sub> | COO <sup>–</sup>                  | COO <sup>–</sup>                              | OCH <sub>3</sub> | 90                | 25.5            | 24.6            | –9.0            | 27.8            | 29.8                  | –2.0             | 11b  |
| <b>2h</b>             | OCH <sub>3</sub> | CONH <sub>2</sub>                 | CONH <sub>2</sub>                             | OCH <sub>3</sub> | 109               | 29.3            | 28.6            | –2.3            | 29.5            | 32.2                  | –3.4             | 11c  |
| <b>2i</b>             | OCH <sub>3</sub> | COOCH <sub>3</sub>                | COOCH <sub>3</sub>                            | OCH <sub>3</sub> | 100               | 27.6            | 27.2            | –6.9            | 29.8            | 30.4                  | –0.6             | 11c  |
| <b>3a</b>             | <sup>i</sup> Pr  | OCH <sub>3</sub>                  | H                                             | H                | 86                | 17.1            | 16.8            | –7.1            | 19.4            | 19.2                  | 0.2              | 5a   |
| <b>3b</b>             | <sup>i</sup> Pr  | OCH <sub>3</sub>                  | OCH <sub>3</sub>                              | OCH <sub>3</sub> | 61                | 15.8            | 15.7            | –7.2            | 18.1            | 17.9                  | 0.2              | 5a   |
| <b>3c</b>             | Br               | Br                                | COOH                                          | COOH             | –8 <sup>i</sup>   | 17.7            | 17.3            | –6.1            | 18.9            | 19.9                  | –1.0             | 11d  |
| <b>4a</b>             | CH <sub>3</sub>  | Br                                | H                                             |                  | 78 <sup>i</sup>   | 17.0            | 16.7            | –8.6            | 19.8            | 20.0                  | –0.3             | 5b   |
| <b>4b</b>             | CH <sub>3</sub>  | CF <sub>3</sub>                   | H                                             |                  | 134 <sup>i</sup>  | 18.9            | 18.6            | –10.2           | 22.8            | 23.3                  | –0.5             | 5b   |
| <b>4c</b>             | CH <sub>3</sub>  | Cl                                | H                                             |                  | 62 <sup>i</sup>   | 15.8            | 15.5            | –8.5            | 18.4            | 18.7                  | –0.3             | 5b   |
| <b>4d</b>             | CH <sub>3</sub>  | Cl                                | NO <sub>2</sub>                               |                  | 54 <sup>i</sup>   | 15.2            | 14.9            | –8.8            | 17.8            | 18.3                  | –0.5             | 5b   |
| <b>4e</b>             | CH <sub>3</sub>  | CN                                | H                                             |                  | –24 <sup>i</sup>  | 11.0            | 10.9            | –7.2            | 12.7            | 14.1                  | –1.3             | 5b   |
| <b>4f</b>             | CH <sub>3</sub>  | COCH <sub>3</sub>                 | H                                             |                  | 2 <sup>i</sup>    | 14.5            | 14.1            | –8.2            | 16.3            | 15.5                  | 0.8              | 5b   |
| <b>4g</b>             | CH <sub>3</sub>  | F                                 | H                                             |                  | –32 <sup>i</sup>  | 10.2            | 10.1            | –7.0            | 11.8            | 12.4                  | –0.6             | 5b   |
| <b>4h</b>             | CH <sub>3</sub>  | F                                 | NO <sub>2</sub>                               |                  | –45 <sup>i</sup>  | 9.8             | 9.7             | –6.4            | 11.1            | 11.6                  | –0.5             | 5b   |
| <b>4i</b>             | CH <sub>3</sub>  | I                                 | H                                             |                  | 112 <sup>i</sup>  | 18.5            | 18.1            | –8.4            | 21.3            | 21.5                  | –0.2             | 5b   |
| <b>4j</b>             | CH <sub>3</sub>  | I                                 | H                                             |                  | 39 <sup>i</sup>   | 14.3            | 13.8            | –6.3            | 15.8            | 16.7                  | –0.9             | 5b   |
| <b>4k</b>             | CH <sub>3</sub>  | <sup>i</sup> Pr                   | H                                             |                  | 165 <sup>i</sup>  | 20.0            | 19.8            | –11.8           | 25.0            | 24.1                  | 0.9              | 5b   |
| <b>4l</b>             | CH <sub>3</sub>  | NH <sub>2</sub>                   | H                                             |                  | 69 <sup>i</sup>   | 16.6            | 16.4            | –8.7            | 19.4            | 19.3                  | 0.1              | 5b   |
| <b>4m</b>             | CH <sub>3</sub>  | N(CH <sub>3</sub> ) <sub>2</sub>  | H                                             |                  | 46 <sup>i</sup>   | 15.3            | 15.0            | –8.9            | 17.8            | 17.1                  | 0.8              | 5b   |
| <b>4n</b>             | CH <sub>3</sub>  | NO <sub>2</sub>                   | H                                             |                  | 16 <sup>i</sup>   | 14.4            | 14.2            | –5.4            | 15.7            | 16.4                  | –0.7             | 5b   |
| <b>4o</b>             | CH <sub>3</sub>  | OCH <sub>3</sub>                  | H                                             |                  | –3 <sup>i</sup>   | 12.4            | 12.3            | –7.2            | 14.3            | 14.7                  | –0.4             | 5b   |
| <b>4p</b>             | CH <sub>3</sub>  | Ph                                | H                                             |                  | 29 <sup>i</sup>   | 14.5            | 14.3            | –6.0            | 16.1            | 16.9                  | –0.7             | 5b   |
| <b>4q</b>             | CH <sub>3</sub>  | SH                                | H                                             |                  | 68 <sup>i</sup>   | 17.0            | 16.7            | –8.3            | 19.6            | 19.4                  | 0.1              | 5b   |
| <b>4r</b>             | CH <sub>3</sub>  | Si(CH <sub>3</sub> ) <sub>3</sub> | H                                             |                  | 123 <sup>i</sup>  | 17.8            | 17.5            | –11.2           | 21.9            | 22.0                  | –0.1             | 5b   |
| <b>5a</b>             | H                |                                   |                                               |                  | 29 <sup>i</sup>   | 21.6            | 20.9            | –6.0            | 22.7            | 23.4                  | –0.7             | 11e  |
| <b>5b</b>             | I                |                                   |                                               |                  | 90 <sup>i</sup>   | 27.8            | 26.8            | –8.5            | 29.9            | 30.2                  | –0.3             | 11e  |
| <b>6<sup>j</sup></b>  |                  |                                   |                                               |                  | 81 <sup>i</sup>   | 21.6            | 20.7            | –9.3            | 24.0            | 27.2                  | –3.2             | 11f  |
| <b>7a</b>             | Cl               | H                                 | H                                             | Cl               | 300               | 39.8            | 38.3            | –9.9            | 44.0            | 44.0                  | 0.0              | 9b   |
| <b>7b</b>             | Cl               | Cl                                | Cl                                            | H                | 300               | 41.1            | 39.5            | –10.0           | 45.2            | 45.2                  | 0.1              | 9b   |
| <b>7c</b>             | Cl               | H                                 | Cl                                            | Cl               | 300               | 39.2            | 37.6            | –10.0           | 43.4            | 44.0                  | –0.6             | 9b   |
| <b>8</b>              |                  |                                   |                                               |                  | 44                | 17.0            | 16.4            | –2.5            | 17.2            | 16.1                  | 1.2              | 5c   |

<sup>a</sup> Both structure optimization and vibrational analysis were carried out at this level of theory. <sup>b</sup> in °C; enthalpies and Gibbs energies of activation are calculated at this temperature. <sup>c</sup> Electronic contribution to the torsional barriers [kcal/mol]. <sup>d</sup> Enthalpy of activation at temperature *T* [kcal/mol]. <sup>e</sup> Entropy of activation at temperature *T* [cal/mol·K]. <sup>f</sup> Gibbs energy of activation at temperature *T* [kcal/mol]. <sup>g</sup> Experimental data. <sup>h</sup> Deviation from experimental data [kcal/mol]. <sup>i</sup> Mean value of a reported temperature interval. <sup>j</sup> Solvation term added to energy, enthalpy and Gibbs energy of activation.

**Table 3a** Deviations from experimentally determined Gibbs energies of activation, calculated with dispersion-corrected and uncorrected GGAs, meta-GGAs and hybrids.

|           | BP86  |       |      | TPSS  |       |       | B3LYP |      |      |
|-----------|-------|-------|------|-------|-------|-------|-------|------|------|
|           |       | -D    | -D3  |       | -D    | -D3   |       | -D   | -D3  |
| <b>1a</b> | 0.1   | -0.8  | 0.6  | -0.3  | -1.0  | 0.1   | 0.9   | -0.1 | 1.3  |
| <b>1c</b> | 1.2   | -1.3  | 0.6  | 1.1   | -1.4  | 0.3   | 2.1   | -0.2 | 2.0  |
| <b>2a</b> | -1.6  | -1.6  | -1.0 | -2.1  | -1.6  | -1.3  | 0.4   | 0.7  | 0.8  |
| <b>2d</b> | -1.0  | -2.3  | 1.3  | -3.2  | -2.4  | 0.0   | 1.9   | 0.5  | 3.2  |
| <b>2i</b> | 1.2   | -3.8  | -2.3 | 1.7   | -3.4  | -0.6  | 4.9   | -1.1 | 0.7  |
| <b>3b</b> | -0.1  | -1.7  | 0.3  | -0.3  | -0.9  | 0.2   | 1.7   | 0.1  | 1.9  |
| <b>4a</b> | -0.7  | -1.9  | 0.3  | -1.0  | -2.2  | -0.3  | 1.2   | 0.0  | 2.0  |
| <b>4b</b> | -0.7  | -2.1  | 0.1  | -1.4  | -2.6  | -0.5  | 0.8   | -0.3 | 1.4  |
| <b>4e</b> | -1.5  | -2.4  | -0.8 | -1.8  | -2.6  | -1.3  | 0.4   | -0.8 | 0.9  |
| <b>4k</b> | 0.9   | -2.9  | 1.6  | 0.3   | -3.1  | 0.9   | 3.1   | -0.9 | 3.4  |
| <b>4r</b> | 0.1   | -3.7  | 0.7  | 0.4   | -4.3  | -0.1  | 2.6   | -1.1 | 3.4  |
| <b>7a</b> | -1.6  | -0.4  | -0.2 | -0.9  | 0.9   | 0.0   | 2.0   | 3.1  | 3.1  |
| <b>8</b>  | -0.2  | 1.0   | 1.7  | -0.1  | 1.0   | 1.2   | 1.0   | 2.1  | 2.5  |
| MD        | -0.31 | -2.08 | 0.10 | -0.64 | -2.05 | -0.21 | 1.83  | 0.00 | 2.00 |
| RMSD      | 0.30  | 0.30  | 0.30 | 0.40  | 0.39  | 0.18  | 0.38  | 0.33 | 0.30 |

**Table 3b** Deviations from experimentally determined Gibbs energies of activation, calculated with dispersion-corrected and uncorrected GGAs, hybrids and double hybrids.

|           | PBE0 |      | B97  |      | $\omega$ B97XD | BMK  | M06-2X | B2PLYP |       |      |
|-----------|------|------|------|------|----------------|------|--------|--------|-------|------|
|           |      | -D3  |      | -D   | -D3            |      |        |        | -D    | -D3  |
| <b>1a</b> | 0.6  | 0.8  | 0.1  | 1.4  | 1.8            | 2.1  | 1.3    | 0.7    | -0.1  | 0.9  |
| <b>1c</b> | 1.5  | 1.2  | 0.2  | 1.9  | 2.0            | 2.8  | 1.3    | 1.5    | -0.3  | 1.4  |
| <b>2a</b> | 0.0  | 0.5  | 1.2  | -0.2 | 1.9            | -2.9 | 0.9    | 0.0    | 0.1   | 0.1  |
| <b>2d</b> | 1.3  | 2.7  | 0.1  | 2.2  | 3.4            | 0.5  | 0.8    | 1.5    | 0.0   | 1.9  |
| <b>2i</b> | 5.0  | 0.8  | -0.6 | -0.4 | 5.5            | 2.6  | 1.8    | 0.1    | -3.6  | -2.7 |
| <b>3b</b> | 0.8  | 1.3  | 0.3  | 1.4  | 2.6            | 0.3  | 1.8    | 1.3    | -0.1  | 1.2  |
| <b>4a</b> | 0.7  | 1.2  | 0.0  | 1.4  | 2.8            | 1.0  | 2.0    | 0.7    | -0.2  | 1.2  |
| <b>4b</b> | 0.7  | 1.1  | 0.2  | 0.9  | 2.1            | -0.1 | 2.7    | 0.3    | -0.5  | 0.7  |
| <b>4e</b> | -0.5 | -0.2 | -0.8 | 0.5  | 1.6            | 1.0  | 1.0    | 0.1    | -0.8  | 0.4  |
| <b>4k</b> | 1.9  | 2.2  | -0.9 | 2.9  | 3.7            | 0.3  | 2.8    | 2.4    | -1.1  | 2.6  |
| <b>4r</b> | 1.1  | 1.3  | -0.9 | 2.8  | 2.8            | 1.3  | 2.5    | 1.5    | -1.2  | 2.2  |
| <b>7a</b> | 1.9  | 2.6  | 1.7  | 1.0  | 4.5            | 0.7  | 3.3    | 0.3    | 1.1   | 0.9  |
| <b>8</b>  | 0.9  | 1.9  | 1.9  | 2.4  | 2.2            | 1.8  | 2.6    | 1.4    | 2.1   | 2.4  |
| MD        | 1.24 | 1.30 | 0.04 | 1.32 | 2.89           | 0.79 | 1.85   | 0.86   | -0.55 | 0.91 |
| RMSD      | 0.40 | 0.25 | 0.23 | 0.30 | 0.35           | 0.43 | 0.24   | 0.21   | 0.32  | 0.39 |

**Table 4** Structures and Cartesian coordinates of ground and transition states of biphenyls **1** – **8**, optimized at the B3LYP–D level.<sup>a</sup> Energies obtained after optimization with the B3LYP–D hybrid (top value), B97–D GGA (middle value) and TPSS–D3 meta-GGA (bottom value).<sup>b</sup>

| Ground State                                                                                                                                           |          |          |          | Transition State |                                                                                                                                                         |          |          |          |          |
|--------------------------------------------------------------------------------------------------------------------------------------------------------|----------|----------|----------|------------------|---------------------------------------------------------------------------------------------------------------------------------------------------------|----------|----------|----------|----------|
| 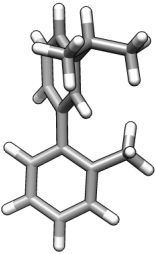 <p><b>1a</b><br/>-620.4223161<br/>-620.3234761<br/>-620.9195148</p>  | H        | 0.74674  | 1.20097  | -3.68552         |  <p><b>1a</b><br/>-620.4114782<br/>-620.3122976<br/>-620.9092183</p>  | H        | -0.00305 | 2.13579  | -3.53938 |
|                                                                                                                                                        | C        | 0.67438  | 1.13866  | -2.60631         |                                                                                                                                                         | C        | -0.00233 | 1.74834  | -2.52781 |
|                                                                                                                                                        | C        | 0.47763  | 0.97964  | 0.18033          |                                                                                                                                                         | C        | -0.00066 | 0.73208  | 0.13078  |
|                                                                                                                                                        | C        | 0.33384  | -0.07568 | -2.01390         |                                                                                                                                                         | C        | -0.00140 | 0.37823  | -2.30880 |
|                                                                                                                                                        | C        | 0.92028  | 2.26300  | -1.82302         |                                                                                                                                                         | C        | -0.00238 | 2.61089  | -1.43659 |
|                                                                                                                                                        | C        | 0.82485  | 2.18581  | -0.44017         |                                                                                                                                                         | C        | -0.00157 | 2.11708  | -0.14330 |
|                                                                                                                                                        | C        | 0.24054  | -0.13553 | -0.62404         |                                                                                                                                                         | C        | -0.00055 | -0.10156 | -0.99727 |
|                                                                                                                                                        | H        | 1.18097  | 3.20259  | -2.29340         |                                                                                                                                                         | H        | -0.00311 | 3.68233  | -1.59184 |
|                                                                                                                                                        | H        | 1.00442  | 3.06193  | 0.16903          |                                                                                                                                                         | H        | -0.00164 | 2.84308  | 0.65227  |
|                                                                                                                                                        | H        | -0.00927 | -1.07639 | -0.15356         |                                                                                                                                                         | H        | 0.00017  | -1.16592 | -0.89196 |
|                                                                                                                                                        | C        | 0.39864  | 0.89662  | 1.65925          |                                                                                                                                                         | C        | 0.00009  | 0.23180  | 1.54848  |
|                                                                                                                                                        | C        | 0.37126  | 0.80672  | 4.46282          |                                                                                                                                                         | C        | 0.00121  | -0.46990 | 4.31230  |
|                                                                                                                                                        | C        | 1.45031  | 1.43180  | 2.41344          |                                                                                                                                                         | C        | -0.00032 | 1.18733  | 2.58477  |
|                                                                                                                                                        | C        | -0.69501 | 0.31503  | 2.32946          |                                                                                                                                                         | C        | 0.00114  | -1.13269 | 1.95355  |
|                                                                                                                                                        | C        | -0.68436 | 0.28520  | 3.72559          |                                                                                                                                                         | C        | 0.00165  | -1.43640 | 3.32090  |
|                                                                                                                                                        | C        | 1.44697  | 1.38781  | 3.80057          |                                                                                                                                                         | C        | 0.00021  | 0.86302  | 3.93046  |
|                                                                                                                                                        | H        | 2.28867  | 1.87391  | 1.89077          |                                                                                                                                                         | H        | -0.00112 | 2.23750  | 2.34730  |
|                                                                                                                                                        | H        | -1.53378 | -0.14756 | 4.24073          |                                                                                                                                                         | H        | 0.00241  | -2.48037 | 3.60879  |
|                                                                                                                                                        | H        | 2.27738  | 1.80127  | 4.35803          |                                                                                                                                                         | H        | -0.00016 | 1.65319  | 4.66993  |
|                                                                                                                                                        | H        | 0.34937  | 0.76622  | 5.54419          |                                                                                                                                                         | H        | 0.00161  | -0.75474 | 5.35622  |
| C                                                                                                                                                      | 0.07239  | -1.30846 | -2.85281 | C                | -0.00095                                                                                                                                                | -0.59858 | -3.46692 |          |          |
| H                                                                                                                                                      | 0.18363  | -1.02085 | -3.90204 | H                | -0.00306                                                                                                                                                | -0.01097 | -4.38926 |          |          |
| C                                                                                                                                                      | 1.09145  | -2.41553 | -2.55210 | C                | 1.26017                                                                                                                                                 | -1.47274 | -3.46363 |          |          |
| H                                                                                                                                                      | 1.01030  | -2.73367 | -1.50996 | H                | 1.29600                                                                                                                                                 | -2.08502 | -2.55922 |          |          |
| H                                                                                                                                                      | 2.11207  | -2.06685 | -2.72023 | H                | 2.16356                                                                                                                                                 | -0.86077 | -3.49319 |          |          |
| H                                                                                                                                                      | 0.90945  | -3.28544 | -3.18768 | H                | 1.26281                                                                                                                                                 | -2.14341 | -4.32618 |          |          |
| C                                                                                                                                                      | -1.35696 | -1.82841 | -2.65024 | C                | -1.25864                                                                                                                                                | -1.47762 | -3.46102 |          |          |
| H                                                                                                                                                      | -1.50812 | -2.12999 | -1.61086 | H                | -1.29001                                                                                                                                                | -2.09049 | -2.55685 |          |          |
| H                                                                                                                                                      | -1.54130 | -2.69817 | -3.28524 | H                | -1.26065                                                                                                                                                | -2.14793 | -4.32386 |          |          |
| H                                                                                                                                                      | -2.09333 | -1.05875 | -2.88919 | H                | -2.16449                                                                                                                                                | -0.86919 | -3.48824 |          |          |
| C                                                                                                                                                      | -1.89315 | -0.24408 | 1.60229  | C                | 0.00180                                                                                                                                                 | -2.33690 | 1.03891  |          |          |
| H                                                                                                                                                      | -1.73191 | -1.28275 | 1.30049  | H                | 0.88577                                                                                                                                                 | -2.36614 | 0.39794  |          |          |
| H                                                                                                                                                      | -2.11090 | 0.32061  | 0.69558  | H                | -0.88252                                                                                                                                                | -2.36754 | 0.39851  |          |          |
| H                                                                                                                                                      | -2.77003 | -0.22389 | 2.25128  | H                | 0.00272                                                                                                                                                 | -3.24926 | 1.63562  |          |          |
|  <p><b>1b</b><br/>-659.7263740<br/>-659.6236733<br/>-660.2556184</p> | H        | 1.39722  | 0.98023  | -3.64721         |  <p><b>1b</b><br/>-659.7141359<br/>-659.6110411<br/>-660.2439795</p> | H        | -2.21993 | 3.62125  | 0.21160  |
|                                                                                                                                                        | C        | 1.22531  | 0.91293  | -2.57963         |                                                                                                                                                         | C        | -1.85625 | 2.60253  | 0.15385  |
|                                                                                                                                                        | C        | 0.76915  | 0.74516  | 0.17667          |                                                                                                                                                         | C        | -0.90079 | -0.07695 | 0.00787  |
|                                                                                                                                                        | C        | 0.63645  | -0.23482 | -2.05328         |                                                                                                                                                         | C        | -0.50146 | 2.35627  | -0.01755 |
|                                                                                                                                                        | C        | 1.59086  | 1.96534  | -1.74459         |                                                                                                                                                         | C        | -2.73295 | 1.52755  | 0.25339  |
|                                                                                                                                                        | C        | 1.36589  | 1.88412  | -0.37674         |                                                                                                                                                         | C        | -2.26891 | 0.22466  | 0.18290  |
|                                                                                                                                                        | C        | 0.42138  | -0.30122 | -0.67762         |                                                                                                                                                         | C        | -0.05396 | 1.03616  | -0.08606 |
|                                                                                                                                                        | H        | 2.04534  | 2.85418  | -2.16350         |                                                                                                                                                         | H        | -3.79269 | 1.70234  | 0.38922  |
|                                                                                                                                                        | H        | 1.63620  | 2.70793  | 0.27078          |                                                                                                                                                         | H        | -3.00616 | -0.55542 | 0.27028  |
|                                                                                                                                                        | H        | -0.01922 | -1.19356 | -0.25705         |                                                                                                                                                         | H        | 1.00028  | 0.91146  | -0.21163 |
|                                                                                                                                                        | C        | 0.54609  | 0.65540  | 1.64094          |                                                                                                                                                         | C        | -0.43224 | -1.50616 | -0.06379 |
|                                                                                                                                                        | C        | 0.27415  | 0.53149  | 4.43182          |                                                                                                                                                         | C        | 0.18539  | -4.29098 | -0.16281 |
|                                                                                                                                                        | C        | 1.61800  | 0.96151  | 2.49132          |                                                                                                                                                         | C        | -1.41008 | -2.51768 | 0.03300  |
|                                                                                                                                                        | C        | -0.69047 | 0.29363  | 2.20747          |                                                                                                                                                         | C        | 0.91130  | -1.94962 | -0.22702 |
|                                                                                                                                                        | C        | -0.79765 | 0.24052  | 3.60018          |                                                                                                                                                         | C        | 1.17168  | -3.32577 | -0.26899 |
|                                                                                                                                                        | C        | 1.49392  | 0.89835  | 3.87101          |                                                                                                                                                         | C        | -1.12747 | -3.87176 | -0.01154 |
|                                                                                                                                                        | H        | 2.56630  | 1.23675  | 2.04802          |                                                                                                                                                         | H        | -2.44718 | -2.25282 | 0.14735  |
|                                                                                                                                                        | H        | -1.75468 | -0.02452 | 4.03473          |                                                                                                                                                         | H        | 2.20036  | -3.64196 | -0.39274 |
|                                                                                                                                                        | H        | 2.34142  | 1.13049  | 4.50280          |                                                                                                                                                         | H        | -1.93452 | -4.58814 | 0.07002  |
|                                                                                                                                                        | H        | 0.15755  | 0.48046  | 5.50670          |                                                                                                                                                         | H        | 0.43862  | -5.34231 | -0.20224 |
| C                                                                                                                                                      | 0.23610  | -1.39153 | -2.94382 | C                | 0.49657                                                                                                                                                 | 3.49104  | -0.12295 |          |          |
| H                                                                                                                                                      | 0.46894  | -1.10915 | -3.97438 | H                | -0.06283                                                                                                                                                | 4.42737  | -0.04366 |          |          |
| C                                                                                                                                                      | 1.03288  | -2.65831 | -2.60471 | C                | 1.51615                                                                                                                                                 | 3.44585  | 1.02324  |          |          |
| H                                                                                                                                                      | 0.82428  | -2.97466 | -1.57986 | H                | 2.09947                                                                                                                                                 | 2.52307  | 0.97812  |          |          |
| H                                                                                                                                                      | 2.10671  | -2.48285 | -2.69203 | H                | 1.01824                                                                                                                                                 | 3.48254  | 1.99401  |          |          |
| H                                                                                                                                                      | 0.75593  | -3.47538 | -3.27523 | H                | 2.20835                                                                                                                                                 | 4.28829  | 0.95291  |          |          |
| C                                                                                                                                                      | -1.27069 | -1.66856 | -2.85313 | C                | 1.21731                                                                                                                                                 | 3.48107  | -1.47749 |          |          |
| H                                                                                                                                                      | -1.54395 | -1.95770 | -1.83543 | H                | 1.79838                                                                                                                                                 | 2.56272  | -1.59240 |          |          |
| H                                                                                                                                                      | -1.55057 | -2.48448 | -3.52367 | H                | 1.90470                                                                                                                                                 | 4.32720  | -1.55115 |          |          |
| H                                                                                                                                                      | -1.85017 | -0.78268 | -3.12001 | H                | 0.50535                                                                                                                                                 | 3.53549  | -2.30308 |          |          |
| C                                                                                                                                                      | -1.92752 | -0.01444 | 1.39491  | C                | 2.15231                                                                                                                                                 | -1.08402 | -0.32087 |          |          |
| H                                                                                                                                                      | -1.81138 | 0.34212  | 0.37280  | H                | 2.02206                                                                                                                                                 | -0.27459 | -1.03815 |          |          |
| H                                                                                                                                                      | -2.76848 | 0.53286  | 1.83009  | H                | 2.95837                                                                                                                                                 | -1.69794 | -0.72706 |          |          |
| C                                                                                                                                                      | -2.27700 | -1.50916 | 1.38674  | C                | 2.60701                                                                                                                                                 | -1.04991 | 1.04649  |          |          |
| H                                                                                                                                                      | -1.46940 | -2.10266 | 0.95419  | H                | 1.81548                                                                                                                                                 | 0.01261  | 1.54192  |          |          |
| H                                                                                                                                                      | -3.18491 | -1.69245 | 0.80775  | H                | 3.47890                                                                                                                                                 | 0.10028  | 0.94131  |          |          |
| H                                                                                                                                                      | -2.43958 | -1.87032 | 2.40430  | H                | 2.87746                                                                                                                                                 | -1.38512 | 1.69533  |          |          |

|                                                                                                                                                                                                                        |                                                                                                                                                                                                                                                                                                                                                                                                                                                                                                                                                                                                                                                                                                                                                                                                                                                                                                                                                                                                                                                                                                                                                                                                                                                                                                                                                                                                                                                                                                                                                                                                                                                                                                                                                                                                                                                                                                                                                                                                                                                                                                                                                                                                                                                                                                                                                                                                                                                                                                                                                                                                                                                                                                                                                                                                                                                                                                                                                                                                                                                                                                                                                    |          |          |         |          |   |         |         |          |   |         |         |         |   |         |          |          |   |         |         |          |   |         |         |          |   |         |          |          |   |         |         |          |   |         |         |         |   |         |          |          |   |         |         |         |   |         |         |         |   |         |         |         |   |          |         |         |   |          |         |         |   |         |         |         |   |         |         |         |   |          |          |         |   |         |          |         |   |         |         |         |   |         |          |          |   |         |          |          |   |         |          |          |   |         |          |          |   |         |          |          |   |         |          |          |   |          |          |          |   |          |          |          |   |          |          |          |   |          |          |          |   |          |         |         |   |          |         |         |   |          |         |         |   |          |         |         |   |          |         |         |   |          |          |         |   |          |          |          |   |          |          |         |   |          |          |         |   |          |          |         |                                                                                                                                                                                                                      |                                                                                                                                                                                                                                                                                                                                                                                                                                                                                                                                                                                                                                                                                                                                                                                                                                                                                                                                                                                                                                                                                                                                                                                                                                                                                                                                                                                                                                                                                                                                                                                                                                                                                                                                                                                                                                                                                                                                                                                                                                                                                                                                                                                                                                                                                                                                                                                                                                                                                                                                                                                                                                                                                                                                                                                                                                                                                                                                         |         |          |         |          |         |          |         |          |         |          |                                                                                                                                                                                                                        |                                                                                                                                                                                                                                                                                                                                                                                                                                                                                                                                                                                                                                                                                                                                                                                                                                                                                                                                                                                                                                                                                                                                                                                                                                                                                                                                                                                                                                                                                                                                                                                                                                                                                                                                                                                                                                                                                                                                                                                                                                                                                                                                                                                                                                                                                                                                                                                                                                                                                                                                                                                                                                                                                                                                                                                                                                                                                                                                                                                                                                                                                                                                                           |   |         |         |          |   |          |         |          |   |          |         |          |   |         |         |          |   |          |         |          |   |          |         |          |   |         |          |          |   |         |         |          |   |         |         |         |   |          |         |          |   |         |          |         |   |         |          |         |   |         |         |         |   |          |          |         |   |          |          |         |   |         |         |         |   |         |         |         |   |          |          |          |   |         |          |          |   |         |          |          |   |          |          |          |   |          |          |          |   |          |          |          |   |          |          |          |   |          |          |          |   |          |          |          |   |          |          |          |   |          |          |          |   |          |          |          |   |          |          |          |   |          |          |         |   |          |          |          |   |          |          |         |   |          |          |         |   |          |          |         |   |          |          |         |   |          |          |         |   |          |          |          |   |          |          |         |   |          |         |         |   |          |         |         |   |          |         |          |   |          |         |         |
|------------------------------------------------------------------------------------------------------------------------------------------------------------------------------------------------------------------------|----------------------------------------------------------------------------------------------------------------------------------------------------------------------------------------------------------------------------------------------------------------------------------------------------------------------------------------------------------------------------------------------------------------------------------------------------------------------------------------------------------------------------------------------------------------------------------------------------------------------------------------------------------------------------------------------------------------------------------------------------------------------------------------------------------------------------------------------------------------------------------------------------------------------------------------------------------------------------------------------------------------------------------------------------------------------------------------------------------------------------------------------------------------------------------------------------------------------------------------------------------------------------------------------------------------------------------------------------------------------------------------------------------------------------------------------------------------------------------------------------------------------------------------------------------------------------------------------------------------------------------------------------------------------------------------------------------------------------------------------------------------------------------------------------------------------------------------------------------------------------------------------------------------------------------------------------------------------------------------------------------------------------------------------------------------------------------------------------------------------------------------------------------------------------------------------------------------------------------------------------------------------------------------------------------------------------------------------------------------------------------------------------------------------------------------------------------------------------------------------------------------------------------------------------------------------------------------------------------------------------------------------------------------------------------------------------------------------------------------------------------------------------------------------------------------------------------------------------------------------------------------------------------------------------------------------------------------------------------------------------------------------------------------------------------------------------------------------------------------------------------------------------|----------|----------|---------|----------|---|---------|---------|----------|---|---------|---------|---------|---|---------|----------|----------|---|---------|---------|----------|---|---------|---------|----------|---|---------|----------|----------|---|---------|---------|----------|---|---------|---------|---------|---|---------|----------|----------|---|---------|---------|---------|---|---------|---------|---------|---|---------|---------|---------|---|----------|---------|---------|---|----------|---------|---------|---|---------|---------|---------|---|---------|---------|---------|---|----------|----------|---------|---|---------|----------|---------|---|---------|---------|---------|---|---------|----------|----------|---|---------|----------|----------|---|---------|----------|----------|---|---------|----------|----------|---|---------|----------|----------|---|---------|----------|----------|---|----------|----------|----------|---|----------|----------|----------|---|----------|----------|----------|---|----------|----------|----------|---|----------|---------|---------|---|----------|---------|---------|---|----------|---------|---------|---|----------|---------|---------|---|----------|---------|---------|---|----------|----------|---------|---|----------|----------|----------|---|----------|----------|---------|---|----------|----------|---------|---|----------|----------|---------|----------------------------------------------------------------------------------------------------------------------------------------------------------------------------------------------------------------------|-----------------------------------------------------------------------------------------------------------------------------------------------------------------------------------------------------------------------------------------------------------------------------------------------------------------------------------------------------------------------------------------------------------------------------------------------------------------------------------------------------------------------------------------------------------------------------------------------------------------------------------------------------------------------------------------------------------------------------------------------------------------------------------------------------------------------------------------------------------------------------------------------------------------------------------------------------------------------------------------------------------------------------------------------------------------------------------------------------------------------------------------------------------------------------------------------------------------------------------------------------------------------------------------------------------------------------------------------------------------------------------------------------------------------------------------------------------------------------------------------------------------------------------------------------------------------------------------------------------------------------------------------------------------------------------------------------------------------------------------------------------------------------------------------------------------------------------------------------------------------------------------------------------------------------------------------------------------------------------------------------------------------------------------------------------------------------------------------------------------------------------------------------------------------------------------------------------------------------------------------------------------------------------------------------------------------------------------------------------------------------------------------------------------------------------------------------------------------------------------------------------------------------------------------------------------------------------------------------------------------------------------------------------------------------------------------------------------------------------------------------------------------------------------------------------------------------------------------------------------------------------------------------------------------------------------|---------|----------|---------|----------|---------|----------|---------|----------|---------|----------|------------------------------------------------------------------------------------------------------------------------------------------------------------------------------------------------------------------------|-----------------------------------------------------------------------------------------------------------------------------------------------------------------------------------------------------------------------------------------------------------------------------------------------------------------------------------------------------------------------------------------------------------------------------------------------------------------------------------------------------------------------------------------------------------------------------------------------------------------------------------------------------------------------------------------------------------------------------------------------------------------------------------------------------------------------------------------------------------------------------------------------------------------------------------------------------------------------------------------------------------------------------------------------------------------------------------------------------------------------------------------------------------------------------------------------------------------------------------------------------------------------------------------------------------------------------------------------------------------------------------------------------------------------------------------------------------------------------------------------------------------------------------------------------------------------------------------------------------------------------------------------------------------------------------------------------------------------------------------------------------------------------------------------------------------------------------------------------------------------------------------------------------------------------------------------------------------------------------------------------------------------------------------------------------------------------------------------------------------------------------------------------------------------------------------------------------------------------------------------------------------------------------------------------------------------------------------------------------------------------------------------------------------------------------------------------------------------------------------------------------------------------------------------------------------------------------------------------------------------------------------------------------------------------------------------------------------------------------------------------------------------------------------------------------------------------------------------------------------------------------------------------------------------------------------------------------------------------------------------------------------------------------------------------------------------------------------------------------------------------------------------------------|---|---------|---------|----------|---|----------|---------|----------|---|----------|---------|----------|---|---------|---------|----------|---|----------|---------|----------|---|----------|---------|----------|---|---------|----------|----------|---|---------|---------|----------|---|---------|---------|---------|---|----------|---------|----------|---|---------|----------|---------|---|---------|----------|---------|---|---------|---------|---------|---|----------|----------|---------|---|----------|----------|---------|---|---------|---------|---------|---|---------|---------|---------|---|----------|----------|----------|---|---------|----------|----------|---|---------|----------|----------|---|----------|----------|----------|---|----------|----------|----------|---|----------|----------|----------|---|----------|----------|----------|---|----------|----------|----------|---|----------|----------|----------|---|----------|----------|----------|---|----------|----------|----------|---|----------|----------|----------|---|----------|----------|----------|---|----------|----------|---------|---|----------|----------|----------|---|----------|----------|---------|---|----------|----------|---------|---|----------|----------|---------|---|----------|----------|---------|---|----------|----------|---------|---|----------|----------|----------|---|----------|----------|---------|---|----------|---------|---------|---|----------|---------|---------|---|----------|---------|----------|---|----------|---------|---------|
| 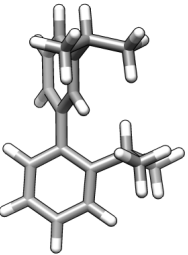 <p><b>1c</b><br/>                     -699.0312927<br/>                     -698.9246309<br/>                     -699.5922427</p>   | <table border="1"> <tbody> <tr><td>H</td><td>1.85312</td><td>1.01117</td><td>-3.50455</td></tr> <tr><td>C</td><td>1.61978</td><td>0.91598</td><td>-2.45085</td></tr> <tr><td>C</td><td>1.00530</td><td>0.67827</td><td>0.26799</td></tr> <tr><td>C</td><td>0.90415</td><td>-0.19451</td><td>-2.00734</td></tr> <tr><td>C</td><td>2.03251</td><td>1.89582</td><td>-1.55208</td></tr> <tr><td>C</td><td>1.72908</td><td>1.77969</td><td>-0.20163</td></tr> <tr><td>C</td><td>0.61219</td><td>-0.29748</td><td>-0.64851</td></tr> <tr><td>H</td><td>2.58607</td><td>2.75563</td><td>-1.90756</td></tr> <tr><td>H</td><td>2.03798</td><td>2.54722</td><td>0.49596</td></tr> <tr><td>H</td><td>0.06792</td><td>-1.15989</td><td>-0.28875</td></tr> <tr><td>C</td><td>0.70137</td><td>0.53740</td><td>1.71400</td></tr> <tr><td>C</td><td>0.30310</td><td>0.22441</td><td>4.47130</td></tr> <tr><td>C</td><td>1.76332</td><td>0.66134</td><td>2.62055</td></tr> <tr><td>C</td><td>-0.59242</td><td>0.27857</td><td>2.20554</td></tr> <tr><td>C</td><td>-0.75862</td><td>0.11848</td><td>3.58424</td></tr> <tr><td>C</td><td>1.57578</td><td>0.50759</td><td>3.98577</td></tr> <tr><td>H</td><td>2.75352</td><td>0.86071</td><td>2.23144</td></tr> <tr><td>H</td><td>-1.74965</td><td>-0.08401</td><td>3.96964</td></tr> <tr><td>H</td><td>2.41536</td><td>0.59780</td><td>4.66273</td></tr> <tr><td>H</td><td>0.13774</td><td>0.09231</td><td>5.53283</td></tr> <tr><td>C</td><td>0.44683</td><td>-1.27011</td><td>-2.96921</td></tr> <tr><td>H</td><td>0.76282</td><td>-0.97042</td><td>-3.97237</td></tr> <tr><td>C</td><td>1.09850</td><td>-2.62139</td><td>-2.64750</td></tr> <tr><td>H</td><td>0.80333</td><td>-2.95718</td><td>-1.65054</td></tr> <tr><td>H</td><td>2.18738</td><td>-2.54859</td><td>-2.67083</td></tr> <tr><td>H</td><td>0.78271</td><td>-3.37940</td><td>-3.36828</td></tr> <tr><td>C</td><td>-1.08232</td><td>-1.40133</td><td>-2.96911</td></tr> <tr><td>H</td><td>-1.43808</td><td>-1.70238</td><td>-1.98074</td></tr> <tr><td>H</td><td>-1.40159</td><td>-2.15854</td><td>-3.68913</td></tr> <tr><td>H</td><td>-1.55834</td><td>-0.45287</td><td>-3.22546</td></tr> <tr><td>C</td><td>-1.81844</td><td>0.19596</td><td>1.31206</td></tr> <tr><td>H</td><td>-1.53066</td><td>0.48978</td><td>0.30459</td></tr> <tr><td>C</td><td>-2.92079</td><td>1.16267</td><td>1.76670</td></tr> <tr><td>H</td><td>-3.29581</td><td>0.89729</td><td>2.75738</td></tr> <tr><td>H</td><td>-3.76067</td><td>1.12526</td><td>1.06894</td></tr> <tr><td>H</td><td>-2.54874</td><td>2.18797</td><td>1.80833</td></tr> <tr><td>C</td><td>-2.36273</td><td>-1.23744</td><td>1.24931</td></tr> <tr><td>H</td><td>-1.60391</td><td>-1.93647</td><td>0.89238</td></tr> <tr><td>H</td><td>-3.22534</td><td>-1.28998</td><td>0.58051</td></tr> <tr><td>H</td><td>-2.67915</td><td>-1.56780</td><td>2.24172</td></tr> </tbody> </table>                                                                                                                                                                                                                  | H        | 1.85312  | 1.01117 | -3.50455 | C | 1.61978 | 0.91598 | -2.45085 | C | 1.00530 | 0.67827 | 0.26799 | C | 0.90415 | -0.19451 | -2.00734 | C | 2.03251 | 1.89582 | -1.55208 | C | 1.72908 | 1.77969 | -0.20163 | C | 0.61219 | -0.29748 | -0.64851 | H | 2.58607 | 2.75563 | -1.90756 | H | 2.03798 | 2.54722 | 0.49596 | H | 0.06792 | -1.15989 | -0.28875 | C | 0.70137 | 0.53740 | 1.71400 | C | 0.30310 | 0.22441 | 4.47130 | C | 1.76332 | 0.66134 | 2.62055 | C | -0.59242 | 0.27857 | 2.20554 | C | -0.75862 | 0.11848 | 3.58424 | C | 1.57578 | 0.50759 | 3.98577 | H | 2.75352 | 0.86071 | 2.23144 | H | -1.74965 | -0.08401 | 3.96964 | H | 2.41536 | 0.59780  | 4.66273 | H | 0.13774 | 0.09231 | 5.53283 | C | 0.44683 | -1.27011 | -2.96921 | H | 0.76282 | -0.97042 | -3.97237 | C | 1.09850 | -2.62139 | -2.64750 | H | 0.80333 | -2.95718 | -1.65054 | H | 2.18738 | -2.54859 | -2.67083 | H | 0.78271 | -3.37940 | -3.36828 | C | -1.08232 | -1.40133 | -2.96911 | H | -1.43808 | -1.70238 | -1.98074 | H | -1.40159 | -2.15854 | -3.68913 | H | -1.55834 | -0.45287 | -3.22546 | C | -1.81844 | 0.19596 | 1.31206 | H | -1.53066 | 0.48978 | 0.30459 | C | -2.92079 | 1.16267 | 1.76670 | H | -3.29581 | 0.89729 | 2.75738 | H | -3.76067 | 1.12526 | 1.06894 | H | -2.54874 | 2.18797  | 1.80833 | C | -2.36273 | -1.23744 | 1.24931  | H | -1.60391 | -1.93647 | 0.89238 | H | -3.22534 | -1.28998 | 0.58051 | H | -2.67915 | -1.56780 | 2.24172 |  <p><b>1c</b><br/>                     -699.0153518<br/>                     -698.9081020<br/>                     -699.5767849</p> | <table border="1"> <tbody> <tr><td>H</td><td>-0.05430</td><td>2.09151</td><td>-3.93390</td></tr> <tr><td>C</td><td>-0.03110</td><td>1.81238</td><td>-2.88747</td></tr> <tr><td>C</td><td>0.02614</td><td>1.07726</td><td>-0.12849</td></tr> <tr><td>C</td><td>0.04585</td><td>0.47625</td><td>-2.52393</td></tr> <tr><td>C</td><td>-0.08577</td><td>2.77961</td><td>-1.88997</td></tr> <tr><td>C</td><td>-0.05961</td><td>2.42290</td><td>-0.55238</td></tr> <tr><td>C</td><td>0.07051</td><td>0.13822</td><td>-1.16979</td></tr> <tr><td>H</td><td>-0.15332</td><td>3.82773</td><td>-2.15266</td></tr> <tr><td>H</td><td>-0.11552</td><td>3.23052</td><td>0.15698</td></tr> <tr><td>H</td><td>0.11711</td><td>-0.90905</td><td>-0.96426</td></tr> <tr><td>C</td><td>0.05248</td><td>0.74117</td><td>1.34468</td></tr> <tr><td>C</td><td>0.03733</td><td>0.42919</td><td>4.18049</td></tr> <tr><td>C</td><td>0.03243</td><td>1.82718</td><td>2.24394</td></tr> <tr><td>C</td><td>0.09640</td><td>-0.55953</td><td>1.93556</td></tr> <tr><td>C</td><td>0.07990</td><td>-0.66429</td><td>3.33169</td></tr> <tr><td>C</td><td>0.02257</td><td>1.69547</td><td>3.62126</td></tr> <tr><td>H</td><td>0.02818</td><td>2.83552</td><td>1.86884</td></tr> <tr><td>H</td><td>0.10663</td><td>-1.64528</td><td>3.77972</td></tr> <tr><td>H</td><td>0.00535</td><td>2.58137</td><td>4.24265</td></tr> <tr><td>H</td><td>0.02585</td><td>0.28763</td><td>5.25341</td></tr> <tr><td>C</td><td>0.08903</td><td>-0.62144</td><td>-3.56721</td></tr> <tr><td>H</td><td>0.06954</td><td>-0.14054</td><td>-4.54921</td></tr> <tr><td>C</td><td>1.37981</td><td>-1.44487</td><td>-3.46697</td></tr> <tr><td>H</td><td>1.43319</td><td>-1.95356</td><td>-2.50123</td></tr> <tr><td>H</td><td>2.26170</td><td>-0.80874</td><td>-3.56246</td></tr> <tr><td>H</td><td>1.40971</td><td>-2.20528</td><td>-4.25097</td></tr> <tr><td>C</td><td>-1.13721</td><td>-1.53826</td><td>-3.46046</td></tr> <tr><td>H</td><td>-1.15496</td><td>-2.03875</td><td>-2.48930</td></tr> <tr><td>H</td><td>-1.11010</td><td>-2.30583</td><td>-4.23761</td></tr> <tr><td>H</td><td>-2.06329</td><td>-0.96948</td><td>-3.56286</td></tr> <tr><td>C</td><td>0.12074</td><td>-1.87395</td><td>1.16151</td></tr> <tr><td>H</td><td>0.81592</td><td>-1.75910</td><td>0.33302</td></tr> <tr><td>C</td><td>-1.28325</td><td>-2.20041</td><td>0.62268</td></tr> <tr><td>H</td><td>-1.94239</td><td>-2.43020</td><td>1.46313</td></tr> <tr><td>H</td><td>-1.25193</td><td>-3.07254</td><td>-0.03575</td></tr> <tr><td>H</td><td>-1.71630</td><td>-1.36564</td><td>0.07323</td></tr> <tr><td>C</td><td>0.64612</td><td>-3.08780</td><td>1.93995</td></tr> <tr><td>H</td><td>1.60577</td><td>-2.87741</td><td>2.41502</td></tr> <tr><td>H</td><td>0.77874</td><td>-3.91865</td><td>1.24411</td></tr> <tr><td>H</td><td>-0.05602</td><td>-3.41701</td><td>2.70865</td></tr> </tbody> </table> | H       | -0.05430 | 2.09151 | -3.93390 | C       | -0.03110 | 1.81238 | -2.88747 | C       | 0.02614  | 1.07726                                                                                                                                                                                                                | -0.12849                                                                                                                                                                                                                                                                                                                                                                                                                                                                                                                                                                                                                                                                                                                                                                                                                                                                                                                                                                                                                                                                                                                                                                                                                                                                                                                                                                                                                                                                                                                                                                                                                                                                                                                                                                                                                                                                                                                                                                                                                                                                                                                                                                                                                                                                                                                                                                                                                                                                                                                                                                                                                                                                                                                                                                                                                                                                                                                                                                                                                                                                                                                                                  | C | 0.04585 | 0.47625 | -2.52393 | C | -0.08577 | 2.77961 | -1.88997 | C | -0.05961 | 2.42290 | -0.55238 | C | 0.07051 | 0.13822 | -1.16979 | H | -0.15332 | 3.82773 | -2.15266 | H | -0.11552 | 3.23052 | 0.15698  | H | 0.11711 | -0.90905 | -0.96426 | C | 0.05248 | 0.74117 | 1.34468  | C | 0.03733 | 0.42919 | 4.18049 | C | 0.03243  | 1.82718 | 2.24394  | C | 0.09640 | -0.55953 | 1.93556 | C | 0.07990 | -0.66429 | 3.33169 | C | 0.02257 | 1.69547 | 3.62126 | H | 0.02818  | 2.83552  | 1.86884 | H | 0.10663  | -1.64528 | 3.77972 | H | 0.00535 | 2.58137 | 4.24265 | H | 0.02585 | 0.28763 | 5.25341 | C | 0.08903  | -0.62144 | -3.56721 | H | 0.06954 | -0.14054 | -4.54921 | C | 1.37981 | -1.44487 | -3.46697 | H | 1.43319  | -1.95356 | -2.50123 | H | 2.26170  | -0.80874 | -3.56246 | H | 1.40971  | -2.20528 | -4.25097 | C | -1.13721 | -1.53826 | -3.46046 | H | -1.15496 | -2.03875 | -2.48930 | H | -1.11010 | -2.30583 | -4.23761 | H | -2.06329 | -0.96948 | -3.56286 | C | 0.12074  | -1.87395 | 1.16151  | H | 0.81592  | -1.75910 | 0.33302  | C | -1.28325 | -2.20041 | 0.62268  | H | -1.94239 | -2.43020 | 1.46313 | H | -1.25193 | -3.07254 | -0.03575 | H | -1.71630 | -1.36564 | 0.07323 | C | 0.64612  | -3.08780 | 1.93995 | H | 1.60577  | -2.87741 | 2.41502 | H | 0.77874  | -3.91865 | 1.24411 | H | -0.05602 | -3.41701 | 2.70865 |   |          |          |          |   |          |          |         |   |          |         |         |   |          |         |         |   |          |         |          |   |          |         |         |
| H                                                                                                                                                                                                                      | 1.85312                                                                                                                                                                                                                                                                                                                                                                                                                                                                                                                                                                                                                                                                                                                                                                                                                                                                                                                                                                                                                                                                                                                                                                                                                                                                                                                                                                                                                                                                                                                                                                                                                                                                                                                                                                                                                                                                                                                                                                                                                                                                                                                                                                                                                                                                                                                                                                                                                                                                                                                                                                                                                                                                                                                                                                                                                                                                                                                                                                                                                                                                                                                                            | 1.01117  | -3.50455 |         |          |   |         |         |          |   |         |         |         |   |         |          |          |   |         |         |          |   |         |         |          |   |         |          |          |   |         |         |          |   |         |         |         |   |         |          |          |   |         |         |         |   |         |         |         |   |         |         |         |   |          |         |         |   |          |         |         |   |         |         |         |   |         |         |         |   |          |          |         |   |         |          |         |   |         |         |         |   |         |          |          |   |         |          |          |   |         |          |          |   |         |          |          |   |         |          |          |   |         |          |          |   |          |          |          |   |          |          |          |   |          |          |          |   |          |          |          |   |          |         |         |   |          |         |         |   |          |         |         |   |          |         |         |   |          |         |         |   |          |          |         |   |          |          |          |   |          |          |         |   |          |          |         |   |          |          |         |                                                                                                                                                                                                                      |                                                                                                                                                                                                                                                                                                                                                                                                                                                                                                                                                                                                                                                                                                                                                                                                                                                                                                                                                                                                                                                                                                                                                                                                                                                                                                                                                                                                                                                                                                                                                                                                                                                                                                                                                                                                                                                                                                                                                                                                                                                                                                                                                                                                                                                                                                                                                                                                                                                                                                                                                                                                                                                                                                                                                                                                                                                                                                                                         |         |          |         |          |         |          |         |          |         |          |                                                                                                                                                                                                                        |                                                                                                                                                                                                                                                                                                                                                                                                                                                                                                                                                                                                                                                                                                                                                                                                                                                                                                                                                                                                                                                                                                                                                                                                                                                                                                                                                                                                                                                                                                                                                                                                                                                                                                                                                                                                                                                                                                                                                                                                                                                                                                                                                                                                                                                                                                                                                                                                                                                                                                                                                                                                                                                                                                                                                                                                                                                                                                                                                                                                                                                                                                                                                           |   |         |         |          |   |          |         |          |   |          |         |          |   |         |         |          |   |          |         |          |   |          |         |          |   |         |          |          |   |         |         |          |   |         |         |         |   |          |         |          |   |         |          |         |   |         |          |         |   |         |         |         |   |          |          |         |   |          |          |         |   |         |         |         |   |         |         |         |   |          |          |          |   |         |          |          |   |         |          |          |   |          |          |          |   |          |          |          |   |          |          |          |   |          |          |          |   |          |          |          |   |          |          |          |   |          |          |          |   |          |          |          |   |          |          |          |   |          |          |          |   |          |          |         |   |          |          |          |   |          |          |         |   |          |          |         |   |          |          |         |   |          |          |         |   |          |          |         |   |          |          |          |   |          |          |         |   |          |         |         |   |          |         |         |   |          |         |          |   |          |         |         |
| C                                                                                                                                                                                                                      | 1.61978                                                                                                                                                                                                                                                                                                                                                                                                                                                                                                                                                                                                                                                                                                                                                                                                                                                                                                                                                                                                                                                                                                                                                                                                                                                                                                                                                                                                                                                                                                                                                                                                                                                                                                                                                                                                                                                                                                                                                                                                                                                                                                                                                                                                                                                                                                                                                                                                                                                                                                                                                                                                                                                                                                                                                                                                                                                                                                                                                                                                                                                                                                                                            | 0.91598  | -2.45085 |         |          |   |         |         |          |   |         |         |         |   |         |          |          |   |         |         |          |   |         |         |          |   |         |          |          |   |         |         |          |   |         |         |         |   |         |          |          |   |         |         |         |   |         |         |         |   |         |         |         |   |          |         |         |   |          |         |         |   |         |         |         |   |         |         |         |   |          |          |         |   |         |          |         |   |         |         |         |   |         |          |          |   |         |          |          |   |         |          |          |   |         |          |          |   |         |          |          |   |         |          |          |   |          |          |          |   |          |          |          |   |          |          |          |   |          |          |          |   |          |         |         |   |          |         |         |   |          |         |         |   |          |         |         |   |          |         |         |   |          |          |         |   |          |          |          |   |          |          |         |   |          |          |         |   |          |          |         |                                                                                                                                                                                                                      |                                                                                                                                                                                                                                                                                                                                                                                                                                                                                                                                                                                                                                                                                                                                                                                                                                                                                                                                                                                                                                                                                                                                                                                                                                                                                                                                                                                                                                                                                                                                                                                                                                                                                                                                                                                                                                                                                                                                                                                                                                                                                                                                                                                                                                                                                                                                                                                                                                                                                                                                                                                                                                                                                                                                                                                                                                                                                                                                         |         |          |         |          |         |          |         |          |         |          |                                                                                                                                                                                                                        |                                                                                                                                                                                                                                                                                                                                                                                                                                                                                                                                                                                                                                                                                                                                                                                                                                                                                                                                                                                                                                                                                                                                                                                                                                                                                                                                                                                                                                                                                                                                                                                                                                                                                                                                                                                                                                                                                                                                                                                                                                                                                                                                                                                                                                                                                                                                                                                                                                                                                                                                                                                                                                                                                                                                                                                                                                                                                                                                                                                                                                                                                                                                                           |   |         |         |          |   |          |         |          |   |          |         |          |   |         |         |          |   |          |         |          |   |          |         |          |   |         |          |          |   |         |         |          |   |         |         |         |   |          |         |          |   |         |          |         |   |         |          |         |   |         |         |         |   |          |          |         |   |          |          |         |   |         |         |         |   |         |         |         |   |          |          |          |   |         |          |          |   |         |          |          |   |          |          |          |   |          |          |          |   |          |          |          |   |          |          |          |   |          |          |          |   |          |          |          |   |          |          |          |   |          |          |          |   |          |          |          |   |          |          |          |   |          |          |         |   |          |          |          |   |          |          |         |   |          |          |         |   |          |          |         |   |          |          |         |   |          |          |         |   |          |          |          |   |          |          |         |   |          |         |         |   |          |         |         |   |          |         |          |   |          |         |         |
| C                                                                                                                                                                                                                      | 1.00530                                                                                                                                                                                                                                                                                                                                                                                                                                                                                                                                                                                                                                                                                                                                                                                                                                                                                                                                                                                                                                                                                                                                                                                                                                                                                                                                                                                                                                                                                                                                                                                                                                                                                                                                                                                                                                                                                                                                                                                                                                                                                                                                                                                                                                                                                                                                                                                                                                                                                                                                                                                                                                                                                                                                                                                                                                                                                                                                                                                                                                                                                                                                            | 0.67827  | 0.26799  |         |          |   |         |         |          |   |         |         |         |   |         |          |          |   |         |         |          |   |         |         |          |   |         |          |          |   |         |         |          |   |         |         |         |   |         |          |          |   |         |         |         |   |         |         |         |   |         |         |         |   |          |         |         |   |          |         |         |   |         |         |         |   |         |         |         |   |          |          |         |   |         |          |         |   |         |         |         |   |         |          |          |   |         |          |          |   |         |          |          |   |         |          |          |   |         |          |          |   |         |          |          |   |          |          |          |   |          |          |          |   |          |          |          |   |          |          |          |   |          |         |         |   |          |         |         |   |          |         |         |   |          |         |         |   |          |         |         |   |          |          |         |   |          |          |          |   |          |          |         |   |          |          |         |   |          |          |         |                                                                                                                                                                                                                      |                                                                                                                                                                                                                                                                                                                                                                                                                                                                                                                                                                                                                                                                                                                                                                                                                                                                                                                                                                                                                                                                                                                                                                                                                                                                                                                                                                                                                                                                                                                                                                                                                                                                                                                                                                                                                                                                                                                                                                                                                                                                                                                                                                                                                                                                                                                                                                                                                                                                                                                                                                                                                                                                                                                                                                                                                                                                                                                                         |         |          |         |          |         |          |         |          |         |          |                                                                                                                                                                                                                        |                                                                                                                                                                                                                                                                                                                                                                                                                                                                                                                                                                                                                                                                                                                                                                                                                                                                                                                                                                                                                                                                                                                                                                                                                                                                                                                                                                                                                                                                                                                                                                                                                                                                                                                                                                                                                                                                                                                                                                                                                                                                                                                                                                                                                                                                                                                                                                                                                                                                                                                                                                                                                                                                                                                                                                                                                                                                                                                                                                                                                                                                                                                                                           |   |         |         |          |   |          |         |          |   |          |         |          |   |         |         |          |   |          |         |          |   |          |         |          |   |         |          |          |   |         |         |          |   |         |         |         |   |          |         |          |   |         |          |         |   |         |          |         |   |         |         |         |   |          |          |         |   |          |          |         |   |         |         |         |   |         |         |         |   |          |          |          |   |         |          |          |   |         |          |          |   |          |          |          |   |          |          |          |   |          |          |          |   |          |          |          |   |          |          |          |   |          |          |          |   |          |          |          |   |          |          |          |   |          |          |          |   |          |          |          |   |          |          |         |   |          |          |          |   |          |          |         |   |          |          |         |   |          |          |         |   |          |          |         |   |          |          |         |   |          |          |          |   |          |          |         |   |          |         |         |   |          |         |         |   |          |         |          |   |          |         |         |
| C                                                                                                                                                                                                                      | 0.90415                                                                                                                                                                                                                                                                                                                                                                                                                                                                                                                                                                                                                                                                                                                                                                                                                                                                                                                                                                                                                                                                                                                                                                                                                                                                                                                                                                                                                                                                                                                                                                                                                                                                                                                                                                                                                                                                                                                                                                                                                                                                                                                                                                                                                                                                                                                                                                                                                                                                                                                                                                                                                                                                                                                                                                                                                                                                                                                                                                                                                                                                                                                                            | -0.19451 | -2.00734 |         |          |   |         |         |          |   |         |         |         |   |         |          |          |   |         |         |          |   |         |         |          |   |         |          |          |   |         |         |          |   |         |         |         |   |         |          |          |   |         |         |         |   |         |         |         |   |         |         |         |   |          |         |         |   |          |         |         |   |         |         |         |   |         |         |         |   |          |          |         |   |         |          |         |   |         |         |         |   |         |          |          |   |         |          |          |   |         |          |          |   |         |          |          |   |         |          |          |   |         |          |          |   |          |          |          |   |          |          |          |   |          |          |          |   |          |          |          |   |          |         |         |   |          |         |         |   |          |         |         |   |          |         |         |   |          |         |         |   |          |          |         |   |          |          |          |   |          |          |         |   |          |          |         |   |          |          |         |                                                                                                                                                                                                                      |                                                                                                                                                                                                                                                                                                                                                                                                                                                                                                                                                                                                                                                                                                                                                                                                                                                                                                                                                                                                                                                                                                                                                                                                                                                                                                                                                                                                                                                                                                                                                                                                                                                                                                                                                                                                                                                                                                                                                                                                                                                                                                                                                                                                                                                                                                                                                                                                                                                                                                                                                                                                                                                                                                                                                                                                                                                                                                                                         |         |          |         |          |         |          |         |          |         |          |                                                                                                                                                                                                                        |                                                                                                                                                                                                                                                                                                                                                                                                                                                                                                                                                                                                                                                                                                                                                                                                                                                                                                                                                                                                                                                                                                                                                                                                                                                                                                                                                                                                                                                                                                                                                                                                                                                                                                                                                                                                                                                                                                                                                                                                                                                                                                                                                                                                                                                                                                                                                                                                                                                                                                                                                                                                                                                                                                                                                                                                                                                                                                                                                                                                                                                                                                                                                           |   |         |         |          |   |          |         |          |   |          |         |          |   |         |         |          |   |          |         |          |   |          |         |          |   |         |          |          |   |         |         |          |   |         |         |         |   |          |         |          |   |         |          |         |   |         |          |         |   |         |         |         |   |          |          |         |   |          |          |         |   |         |         |         |   |         |         |         |   |          |          |          |   |         |          |          |   |         |          |          |   |          |          |          |   |          |          |          |   |          |          |          |   |          |          |          |   |          |          |          |   |          |          |          |   |          |          |          |   |          |          |          |   |          |          |          |   |          |          |          |   |          |          |         |   |          |          |          |   |          |          |         |   |          |          |         |   |          |          |         |   |          |          |         |   |          |          |         |   |          |          |          |   |          |          |         |   |          |         |         |   |          |         |         |   |          |         |          |   |          |         |         |
| C                                                                                                                                                                                                                      | 2.03251                                                                                                                                                                                                                                                                                                                                                                                                                                                                                                                                                                                                                                                                                                                                                                                                                                                                                                                                                                                                                                                                                                                                                                                                                                                                                                                                                                                                                                                                                                                                                                                                                                                                                                                                                                                                                                                                                                                                                                                                                                                                                                                                                                                                                                                                                                                                                                                                                                                                                                                                                                                                                                                                                                                                                                                                                                                                                                                                                                                                                                                                                                                                            | 1.89582  | -1.55208 |         |          |   |         |         |          |   |         |         |         |   |         |          |          |   |         |         |          |   |         |         |          |   |         |          |          |   |         |         |          |   |         |         |         |   |         |          |          |   |         |         |         |   |         |         |         |   |         |         |         |   |          |         |         |   |          |         |         |   |         |         |         |   |         |         |         |   |          |          |         |   |         |          |         |   |         |         |         |   |         |          |          |   |         |          |          |   |         |          |          |   |         |          |          |   |         |          |          |   |         |          |          |   |          |          |          |   |          |          |          |   |          |          |          |   |          |          |          |   |          |         |         |   |          |         |         |   |          |         |         |   |          |         |         |   |          |         |         |   |          |          |         |   |          |          |          |   |          |          |         |   |          |          |         |   |          |          |         |                                                                                                                                                                                                                      |                                                                                                                                                                                                                                                                                                                                                                                                                                                                                                                                                                                                                                                                                                                                                                                                                                                                                                                                                                                                                                                                                                                                                                                                                                                                                                                                                                                                                                                                                                                                                                                                                                                                                                                                                                                                                                                                                                                                                                                                                                                                                                                                                                                                                                                                                                                                                                                                                                                                                                                                                                                                                                                                                                                                                                                                                                                                                                                                         |         |          |         |          |         |          |         |          |         |          |                                                                                                                                                                                                                        |                                                                                                                                                                                                                                                                                                                                                                                                                                                                                                                                                                                                                                                                                                                                                                                                                                                                                                                                                                                                                                                                                                                                                                                                                                                                                                                                                                                                                                                                                                                                                                                                                                                                                                                                                                                                                                                                                                                                                                                                                                                                                                                                                                                                                                                                                                                                                                                                                                                                                                                                                                                                                                                                                                                                                                                                                                                                                                                                                                                                                                                                                                                                                           |   |         |         |          |   |          |         |          |   |          |         |          |   |         |         |          |   |          |         |          |   |          |         |          |   |         |          |          |   |         |         |          |   |         |         |         |   |          |         |          |   |         |          |         |   |         |          |         |   |         |         |         |   |          |          |         |   |          |          |         |   |         |         |         |   |         |         |         |   |          |          |          |   |         |          |          |   |         |          |          |   |          |          |          |   |          |          |          |   |          |          |          |   |          |          |          |   |          |          |          |   |          |          |          |   |          |          |          |   |          |          |          |   |          |          |          |   |          |          |          |   |          |          |         |   |          |          |          |   |          |          |         |   |          |          |         |   |          |          |         |   |          |          |         |   |          |          |         |   |          |          |          |   |          |          |         |   |          |         |         |   |          |         |         |   |          |         |          |   |          |         |         |
| C                                                                                                                                                                                                                      | 1.72908                                                                                                                                                                                                                                                                                                                                                                                                                                                                                                                                                                                                                                                                                                                                                                                                                                                                                                                                                                                                                                                                                                                                                                                                                                                                                                                                                                                                                                                                                                                                                                                                                                                                                                                                                                                                                                                                                                                                                                                                                                                                                                                                                                                                                                                                                                                                                                                                                                                                                                                                                                                                                                                                                                                                                                                                                                                                                                                                                                                                                                                                                                                                            | 1.77969  | -0.20163 |         |          |   |         |         |          |   |         |         |         |   |         |          |          |   |         |         |          |   |         |         |          |   |         |          |          |   |         |         |          |   |         |         |         |   |         |          |          |   |         |         |         |   |         |         |         |   |         |         |         |   |          |         |         |   |          |         |         |   |         |         |         |   |         |         |         |   |          |          |         |   |         |          |         |   |         |         |         |   |         |          |          |   |         |          |          |   |         |          |          |   |         |          |          |   |         |          |          |   |         |          |          |   |          |          |          |   |          |          |          |   |          |          |          |   |          |          |          |   |          |         |         |   |          |         |         |   |          |         |         |   |          |         |         |   |          |         |         |   |          |          |         |   |          |          |          |   |          |          |         |   |          |          |         |   |          |          |         |                                                                                                                                                                                                                      |                                                                                                                                                                                                                                                                                                                                                                                                                                                                                                                                                                                                                                                                                                                                                                                                                                                                                                                                                                                                                                                                                                                                                                                                                                                                                                                                                                                                                                                                                                                                                                                                                                                                                                                                                                                                                                                                                                                                                                                                                                                                                                                                                                                                                                                                                                                                                                                                                                                                                                                                                                                                                                                                                                                                                                                                                                                                                                                                         |         |          |         |          |         |          |         |          |         |          |                                                                                                                                                                                                                        |                                                                                                                                                                                                                                                                                                                                                                                                                                                                                                                                                                                                                                                                                                                                                                                                                                                                                                                                                                                                                                                                                                                                                                                                                                                                                                                                                                                                                                                                                                                                                                                                                                                                                                                                                                                                                                                                                                                                                                                                                                                                                                                                                                                                                                                                                                                                                                                                                                                                                                                                                                                                                                                                                                                                                                                                                                                                                                                                                                                                                                                                                                                                                           |   |         |         |          |   |          |         |          |   |          |         |          |   |         |         |          |   |          |         |          |   |          |         |          |   |         |          |          |   |         |         |          |   |         |         |         |   |          |         |          |   |         |          |         |   |         |          |         |   |         |         |         |   |          |          |         |   |          |          |         |   |         |         |         |   |         |         |         |   |          |          |          |   |         |          |          |   |         |          |          |   |          |          |          |   |          |          |          |   |          |          |          |   |          |          |          |   |          |          |          |   |          |          |          |   |          |          |          |   |          |          |          |   |          |          |          |   |          |          |          |   |          |          |         |   |          |          |          |   |          |          |         |   |          |          |         |   |          |          |         |   |          |          |         |   |          |          |         |   |          |          |          |   |          |          |         |   |          |         |         |   |          |         |         |   |          |         |          |   |          |         |         |
| C                                                                                                                                                                                                                      | 0.61219                                                                                                                                                                                                                                                                                                                                                                                                                                                                                                                                                                                                                                                                                                                                                                                                                                                                                                                                                                                                                                                                                                                                                                                                                                                                                                                                                                                                                                                                                                                                                                                                                                                                                                                                                                                                                                                                                                                                                                                                                                                                                                                                                                                                                                                                                                                                                                                                                                                                                                                                                                                                                                                                                                                                                                                                                                                                                                                                                                                                                                                                                                                                            | -0.29748 | -0.64851 |         |          |   |         |         |          |   |         |         |         |   |         |          |          |   |         |         |          |   |         |         |          |   |         |          |          |   |         |         |          |   |         |         |         |   |         |          |          |   |         |         |         |   |         |         |         |   |         |         |         |   |          |         |         |   |          |         |         |   |         |         |         |   |         |         |         |   |          |          |         |   |         |          |         |   |         |         |         |   |         |          |          |   |         |          |          |   |         |          |          |   |         |          |          |   |         |          |          |   |         |          |          |   |          |          |          |   |          |          |          |   |          |          |          |   |          |          |          |   |          |         |         |   |          |         |         |   |          |         |         |   |          |         |         |   |          |         |         |   |          |          |         |   |          |          |          |   |          |          |         |   |          |          |         |   |          |          |         |                                                                                                                                                                                                                      |                                                                                                                                                                                                                                                                                                                                                                                                                                                                                                                                                                                                                                                                                                                                                                                                                                                                                                                                                                                                                                                                                                                                                                                                                                                                                                                                                                                                                                                                                                                                                                                                                                                                                                                                                                                                                                                                                                                                                                                                                                                                                                                                                                                                                                                                                                                                                                                                                                                                                                                                                                                                                                                                                                                                                                                                                                                                                                                                         |         |          |         |          |         |          |         |          |         |          |                                                                                                                                                                                                                        |                                                                                                                                                                                                                                                                                                                                                                                                                                                                                                                                                                                                                                                                                                                                                                                                                                                                                                                                                                                                                                                                                                                                                                                                                                                                                                                                                                                                                                                                                                                                                                                                                                                                                                                                                                                                                                                                                                                                                                                                                                                                                                                                                                                                                                                                                                                                                                                                                                                                                                                                                                                                                                                                                                                                                                                                                                                                                                                                                                                                                                                                                                                                                           |   |         |         |          |   |          |         |          |   |          |         |          |   |         |         |          |   |          |         |          |   |          |         |          |   |         |          |          |   |         |         |          |   |         |         |         |   |          |         |          |   |         |          |         |   |         |          |         |   |         |         |         |   |          |          |         |   |          |          |         |   |         |         |         |   |         |         |         |   |          |          |          |   |         |          |          |   |         |          |          |   |          |          |          |   |          |          |          |   |          |          |          |   |          |          |          |   |          |          |          |   |          |          |          |   |          |          |          |   |          |          |          |   |          |          |          |   |          |          |          |   |          |          |         |   |          |          |          |   |          |          |         |   |          |          |         |   |          |          |         |   |          |          |         |   |          |          |         |   |          |          |          |   |          |          |         |   |          |         |         |   |          |         |         |   |          |         |          |   |          |         |         |
| H                                                                                                                                                                                                                      | 2.58607                                                                                                                                                                                                                                                                                                                                                                                                                                                                                                                                                                                                                                                                                                                                                                                                                                                                                                                                                                                                                                                                                                                                                                                                                                                                                                                                                                                                                                                                                                                                                                                                                                                                                                                                                                                                                                                                                                                                                                                                                                                                                                                                                                                                                                                                                                                                                                                                                                                                                                                                                                                                                                                                                                                                                                                                                                                                                                                                                                                                                                                                                                                                            | 2.75563  | -1.90756 |         |          |   |         |         |          |   |         |         |         |   |         |          |          |   |         |         |          |   |         |         |          |   |         |          |          |   |         |         |          |   |         |         |         |   |         |          |          |   |         |         |         |   |         |         |         |   |         |         |         |   |          |         |         |   |          |         |         |   |         |         |         |   |         |         |         |   |          |          |         |   |         |          |         |   |         |         |         |   |         |          |          |   |         |          |          |   |         |          |          |   |         |          |          |   |         |          |          |   |         |          |          |   |          |          |          |   |          |          |          |   |          |          |          |   |          |          |          |   |          |         |         |   |          |         |         |   |          |         |         |   |          |         |         |   |          |         |         |   |          |          |         |   |          |          |          |   |          |          |         |   |          |          |         |   |          |          |         |                                                                                                                                                                                                                      |                                                                                                                                                                                                                                                                                                                                                                                                                                                                                                                                                                                                                                                                                                                                                                                                                                                                                                                                                                                                                                                                                                                                                                                                                                                                                                                                                                                                                                                                                                                                                                                                                                                                                                                                                                                                                                                                                                                                                                                                                                                                                                                                                                                                                                                                                                                                                                                                                                                                                                                                                                                                                                                                                                                                                                                                                                                                                                                                         |         |          |         |          |         |          |         |          |         |          |                                                                                                                                                                                                                        |                                                                                                                                                                                                                                                                                                                                                                                                                                                                                                                                                                                                                                                                                                                                                                                                                                                                                                                                                                                                                                                                                                                                                                                                                                                                                                                                                                                                                                                                                                                                                                                                                                                                                                                                                                                                                                                                                                                                                                                                                                                                                                                                                                                                                                                                                                                                                                                                                                                                                                                                                                                                                                                                                                                                                                                                                                                                                                                                                                                                                                                                                                                                                           |   |         |         |          |   |          |         |          |   |          |         |          |   |         |         |          |   |          |         |          |   |          |         |          |   |         |          |          |   |         |         |          |   |         |         |         |   |          |         |          |   |         |          |         |   |         |          |         |   |         |         |         |   |          |          |         |   |          |          |         |   |         |         |         |   |         |         |         |   |          |          |          |   |         |          |          |   |         |          |          |   |          |          |          |   |          |          |          |   |          |          |          |   |          |          |          |   |          |          |          |   |          |          |          |   |          |          |          |   |          |          |          |   |          |          |          |   |          |          |          |   |          |          |         |   |          |          |          |   |          |          |         |   |          |          |         |   |          |          |         |   |          |          |         |   |          |          |         |   |          |          |          |   |          |          |         |   |          |         |         |   |          |         |         |   |          |         |          |   |          |         |         |
| H                                                                                                                                                                                                                      | 2.03798                                                                                                                                                                                                                                                                                                                                                                                                                                                                                                                                                                                                                                                                                                                                                                                                                                                                                                                                                                                                                                                                                                                                                                                                                                                                                                                                                                                                                                                                                                                                                                                                                                                                                                                                                                                                                                                                                                                                                                                                                                                                                                                                                                                                                                                                                                                                                                                                                                                                                                                                                                                                                                                                                                                                                                                                                                                                                                                                                                                                                                                                                                                                            | 2.54722  | 0.49596  |         |          |   |         |         |          |   |         |         |         |   |         |          |          |   |         |         |          |   |         |         |          |   |         |          |          |   |         |         |          |   |         |         |         |   |         |          |          |   |         |         |         |   |         |         |         |   |         |         |         |   |          |         |         |   |          |         |         |   |         |         |         |   |         |         |         |   |          |          |         |   |         |          |         |   |         |         |         |   |         |          |          |   |         |          |          |   |         |          |          |   |         |          |          |   |         |          |          |   |         |          |          |   |          |          |          |   |          |          |          |   |          |          |          |   |          |          |          |   |          |         |         |   |          |         |         |   |          |         |         |   |          |         |         |   |          |         |         |   |          |          |         |   |          |          |          |   |          |          |         |   |          |          |         |   |          |          |         |                                                                                                                                                                                                                      |                                                                                                                                                                                                                                                                                                                                                                                                                                                                                                                                                                                                                                                                                                                                                                                                                                                                                                                                                                                                                                                                                                                                                                                                                                                                                                                                                                                                                                                                                                                                                                                                                                                                                                                                                                                                                                                                                                                                                                                                                                                                                                                                                                                                                                                                                                                                                                                                                                                                                                                                                                                                                                                                                                                                                                                                                                                                                                                                         |         |          |         |          |         |          |         |          |         |          |                                                                                                                                                                                                                        |                                                                                                                                                                                                                                                                                                                                                                                                                                                                                                                                                                                                                                                                                                                                                                                                                                                                                                                                                                                                                                                                                                                                                                                                                                                                                                                                                                                                                                                                                                                                                                                                                                                                                                                                                                                                                                                                                                                                                                                                                                                                                                                                                                                                                                                                                                                                                                                                                                                                                                                                                                                                                                                                                                                                                                                                                                                                                                                                                                                                                                                                                                                                                           |   |         |         |          |   |          |         |          |   |          |         |          |   |         |         |          |   |          |         |          |   |          |         |          |   |         |          |          |   |         |         |          |   |         |         |         |   |          |         |          |   |         |          |         |   |         |          |         |   |         |         |         |   |          |          |         |   |          |          |         |   |         |         |         |   |         |         |         |   |          |          |          |   |         |          |          |   |         |          |          |   |          |          |          |   |          |          |          |   |          |          |          |   |          |          |          |   |          |          |          |   |          |          |          |   |          |          |          |   |          |          |          |   |          |          |          |   |          |          |          |   |          |          |         |   |          |          |          |   |          |          |         |   |          |          |         |   |          |          |         |   |          |          |         |   |          |          |         |   |          |          |          |   |          |          |         |   |          |         |         |   |          |         |         |   |          |         |          |   |          |         |         |
| H                                                                                                                                                                                                                      | 0.06792                                                                                                                                                                                                                                                                                                                                                                                                                                                                                                                                                                                                                                                                                                                                                                                                                                                                                                                                                                                                                                                                                                                                                                                                                                                                                                                                                                                                                                                                                                                                                                                                                                                                                                                                                                                                                                                                                                                                                                                                                                                                                                                                                                                                                                                                                                                                                                                                                                                                                                                                                                                                                                                                                                                                                                                                                                                                                                                                                                                                                                                                                                                                            | -1.15989 | -0.28875 |         |          |   |         |         |          |   |         |         |         |   |         |          |          |   |         |         |          |   |         |         |          |   |         |          |          |   |         |         |          |   |         |         |         |   |         |          |          |   |         |         |         |   |         |         |         |   |         |         |         |   |          |         |         |   |          |         |         |   |         |         |         |   |         |         |         |   |          |          |         |   |         |          |         |   |         |         |         |   |         |          |          |   |         |          |          |   |         |          |          |   |         |          |          |   |         |          |          |   |         |          |          |   |          |          |          |   |          |          |          |   |          |          |          |   |          |          |          |   |          |         |         |   |          |         |         |   |          |         |         |   |          |         |         |   |          |         |         |   |          |          |         |   |          |          |          |   |          |          |         |   |          |          |         |   |          |          |         |                                                                                                                                                                                                                      |                                                                                                                                                                                                                                                                                                                                                                                                                                                                                                                                                                                                                                                                                                                                                                                                                                                                                                                                                                                                                                                                                                                                                                                                                                                                                                                                                                                                                                                                                                                                                                                                                                                                                                                                                                                                                                                                                                                                                                                                                                                                                                                                                                                                                                                                                                                                                                                                                                                                                                                                                                                                                                                                                                                                                                                                                                                                                                                                         |         |          |         |          |         |          |         |          |         |          |                                                                                                                                                                                                                        |                                                                                                                                                                                                                                                                                                                                                                                                                                                                                                                                                                                                                                                                                                                                                                                                                                                                                                                                                                                                                                                                                                                                                                                                                                                                                                                                                                                                                                                                                                                                                                                                                                                                                                                                                                                                                                                                                                                                                                                                                                                                                                                                                                                                                                                                                                                                                                                                                                                                                                                                                                                                                                                                                                                                                                                                                                                                                                                                                                                                                                                                                                                                                           |   |         |         |          |   |          |         |          |   |          |         |          |   |         |         |          |   |          |         |          |   |          |         |          |   |         |          |          |   |         |         |          |   |         |         |         |   |          |         |          |   |         |          |         |   |         |          |         |   |         |         |         |   |          |          |         |   |          |          |         |   |         |         |         |   |         |         |         |   |          |          |          |   |         |          |          |   |         |          |          |   |          |          |          |   |          |          |          |   |          |          |          |   |          |          |          |   |          |          |          |   |          |          |          |   |          |          |          |   |          |          |          |   |          |          |          |   |          |          |          |   |          |          |         |   |          |          |          |   |          |          |         |   |          |          |         |   |          |          |         |   |          |          |         |   |          |          |         |   |          |          |          |   |          |          |         |   |          |         |         |   |          |         |         |   |          |         |          |   |          |         |         |
| C                                                                                                                                                                                                                      | 0.70137                                                                                                                                                                                                                                                                                                                                                                                                                                                                                                                                                                                                                                                                                                                                                                                                                                                                                                                                                                                                                                                                                                                                                                                                                                                                                                                                                                                                                                                                                                                                                                                                                                                                                                                                                                                                                                                                                                                                                                                                                                                                                                                                                                                                                                                                                                                                                                                                                                                                                                                                                                                                                                                                                                                                                                                                                                                                                                                                                                                                                                                                                                                                            | 0.53740  | 1.71400  |         |          |   |         |         |          |   |         |         |         |   |         |          |          |   |         |         |          |   |         |         |          |   |         |          |          |   |         |         |          |   |         |         |         |   |         |          |          |   |         |         |         |   |         |         |         |   |         |         |         |   |          |         |         |   |          |         |         |   |         |         |         |   |         |         |         |   |          |          |         |   |         |          |         |   |         |         |         |   |         |          |          |   |         |          |          |   |         |          |          |   |         |          |          |   |         |          |          |   |         |          |          |   |          |          |          |   |          |          |          |   |          |          |          |   |          |          |          |   |          |         |         |   |          |         |         |   |          |         |         |   |          |         |         |   |          |         |         |   |          |          |         |   |          |          |          |   |          |          |         |   |          |          |         |   |          |          |         |                                                                                                                                                                                                                      |                                                                                                                                                                                                                                                                                                                                                                                                                                                                                                                                                                                                                                                                                                                                                                                                                                                                                                                                                                                                                                                                                                                                                                                                                                                                                                                                                                                                                                                                                                                                                                                                                                                                                                                                                                                                                                                                                                                                                                                                                                                                                                                                                                                                                                                                                                                                                                                                                                                                                                                                                                                                                                                                                                                                                                                                                                                                                                                                         |         |          |         |          |         |          |         |          |         |          |                                                                                                                                                                                                                        |                                                                                                                                                                                                                                                                                                                                                                                                                                                                                                                                                                                                                                                                                                                                                                                                                                                                                                                                                                                                                                                                                                                                                                                                                                                                                                                                                                                                                                                                                                                                                                                                                                                                                                                                                                                                                                                                                                                                                                                                                                                                                                                                                                                                                                                                                                                                                                                                                                                                                                                                                                                                                                                                                                                                                                                                                                                                                                                                                                                                                                                                                                                                                           |   |         |         |          |   |          |         |          |   |          |         |          |   |         |         |          |   |          |         |          |   |          |         |          |   |         |          |          |   |         |         |          |   |         |         |         |   |          |         |          |   |         |          |         |   |         |          |         |   |         |         |         |   |          |          |         |   |          |          |         |   |         |         |         |   |         |         |         |   |          |          |          |   |         |          |          |   |         |          |          |   |          |          |          |   |          |          |          |   |          |          |          |   |          |          |          |   |          |          |          |   |          |          |          |   |          |          |          |   |          |          |          |   |          |          |          |   |          |          |          |   |          |          |         |   |          |          |          |   |          |          |         |   |          |          |         |   |          |          |         |   |          |          |         |   |          |          |         |   |          |          |          |   |          |          |         |   |          |         |         |   |          |         |         |   |          |         |          |   |          |         |         |
| C                                                                                                                                                                                                                      | 0.30310                                                                                                                                                                                                                                                                                                                                                                                                                                                                                                                                                                                                                                                                                                                                                                                                                                                                                                                                                                                                                                                                                                                                                                                                                                                                                                                                                                                                                                                                                                                                                                                                                                                                                                                                                                                                                                                                                                                                                                                                                                                                                                                                                                                                                                                                                                                                                                                                                                                                                                                                                                                                                                                                                                                                                                                                                                                                                                                                                                                                                                                                                                                                            | 0.22441  | 4.47130  |         |          |   |         |         |          |   |         |         |         |   |         |          |          |   |         |         |          |   |         |         |          |   |         |          |          |   |         |         |          |   |         |         |         |   |         |          |          |   |         |         |         |   |         |         |         |   |         |         |         |   |          |         |         |   |          |         |         |   |         |         |         |   |         |         |         |   |          |          |         |   |         |          |         |   |         |         |         |   |         |          |          |   |         |          |          |   |         |          |          |   |         |          |          |   |         |          |          |   |         |          |          |   |          |          |          |   |          |          |          |   |          |          |          |   |          |          |          |   |          |         |         |   |          |         |         |   |          |         |         |   |          |         |         |   |          |         |         |   |          |          |         |   |          |          |          |   |          |          |         |   |          |          |         |   |          |          |         |                                                                                                                                                                                                                      |                                                                                                                                                                                                                                                                                                                                                                                                                                                                                                                                                                                                                                                                                                                                                                                                                                                                                                                                                                                                                                                                                                                                                                                                                                                                                                                                                                                                                                                                                                                                                                                                                                                                                                                                                                                                                                                                                                                                                                                                                                                                                                                                                                                                                                                                                                                                                                                                                                                                                                                                                                                                                                                                                                                                                                                                                                                                                                                                         |         |          |         |          |         |          |         |          |         |          |                                                                                                                                                                                                                        |                                                                                                                                                                                                                                                                                                                                                                                                                                                                                                                                                                                                                                                                                                                                                                                                                                                                                                                                                                                                                                                                                                                                                                                                                                                                                                                                                                                                                                                                                                                                                                                                                                                                                                                                                                                                                                                                                                                                                                                                                                                                                                                                                                                                                                                                                                                                                                                                                                                                                                                                                                                                                                                                                                                                                                                                                                                                                                                                                                                                                                                                                                                                                           |   |         |         |          |   |          |         |          |   |          |         |          |   |         |         |          |   |          |         |          |   |          |         |          |   |         |          |          |   |         |         |          |   |         |         |         |   |          |         |          |   |         |          |         |   |         |          |         |   |         |         |         |   |          |          |         |   |          |          |         |   |         |         |         |   |         |         |         |   |          |          |          |   |         |          |          |   |         |          |          |   |          |          |          |   |          |          |          |   |          |          |          |   |          |          |          |   |          |          |          |   |          |          |          |   |          |          |          |   |          |          |          |   |          |          |          |   |          |          |          |   |          |          |         |   |          |          |          |   |          |          |         |   |          |          |         |   |          |          |         |   |          |          |         |   |          |          |         |   |          |          |          |   |          |          |         |   |          |         |         |   |          |         |         |   |          |         |          |   |          |         |         |
| C                                                                                                                                                                                                                      | 1.76332                                                                                                                                                                                                                                                                                                                                                                                                                                                                                                                                                                                                                                                                                                                                                                                                                                                                                                                                                                                                                                                                                                                                                                                                                                                                                                                                                                                                                                                                                                                                                                                                                                                                                                                                                                                                                                                                                                                                                                                                                                                                                                                                                                                                                                                                                                                                                                                                                                                                                                                                                                                                                                                                                                                                                                                                                                                                                                                                                                                                                                                                                                                                            | 0.66134  | 2.62055  |         |          |   |         |         |          |   |         |         |         |   |         |          |          |   |         |         |          |   |         |         |          |   |         |          |          |   |         |         |          |   |         |         |         |   |         |          |          |   |         |         |         |   |         |         |         |   |         |         |         |   |          |         |         |   |          |         |         |   |         |         |         |   |         |         |         |   |          |          |         |   |         |          |         |   |         |         |         |   |         |          |          |   |         |          |          |   |         |          |          |   |         |          |          |   |         |          |          |   |         |          |          |   |          |          |          |   |          |          |          |   |          |          |          |   |          |          |          |   |          |         |         |   |          |         |         |   |          |         |         |   |          |         |         |   |          |         |         |   |          |          |         |   |          |          |          |   |          |          |         |   |          |          |         |   |          |          |         |                                                                                                                                                                                                                      |                                                                                                                                                                                                                                                                                                                                                                                                                                                                                                                                                                                                                                                                                                                                                                                                                                                                                                                                                                                                                                                                                                                                                                                                                                                                                                                                                                                                                                                                                                                                                                                                                                                                                                                                                                                                                                                                                                                                                                                                                                                                                                                                                                                                                                                                                                                                                                                                                                                                                                                                                                                                                                                                                                                                                                                                                                                                                                                                         |         |          |         |          |         |          |         |          |         |          |                                                                                                                                                                                                                        |                                                                                                                                                                                                                                                                                                                                                                                                                                                                                                                                                                                                                                                                                                                                                                                                                                                                                                                                                                                                                                                                                                                                                                                                                                                                                                                                                                                                                                                                                                                                                                                                                                                                                                                                                                                                                                                                                                                                                                                                                                                                                                                                                                                                                                                                                                                                                                                                                                                                                                                                                                                                                                                                                                                                                                                                                                                                                                                                                                                                                                                                                                                                                           |   |         |         |          |   |          |         |          |   |          |         |          |   |         |         |          |   |          |         |          |   |          |         |          |   |         |          |          |   |         |         |          |   |         |         |         |   |          |         |          |   |         |          |         |   |         |          |         |   |         |         |         |   |          |          |         |   |          |          |         |   |         |         |         |   |         |         |         |   |          |          |          |   |         |          |          |   |         |          |          |   |          |          |          |   |          |          |          |   |          |          |          |   |          |          |          |   |          |          |          |   |          |          |          |   |          |          |          |   |          |          |          |   |          |          |          |   |          |          |          |   |          |          |         |   |          |          |          |   |          |          |         |   |          |          |         |   |          |          |         |   |          |          |         |   |          |          |         |   |          |          |          |   |          |          |         |   |          |         |         |   |          |         |         |   |          |         |          |   |          |         |         |
| C                                                                                                                                                                                                                      | -0.59242                                                                                                                                                                                                                                                                                                                                                                                                                                                                                                                                                                                                                                                                                                                                                                                                                                                                                                                                                                                                                                                                                                                                                                                                                                                                                                                                                                                                                                                                                                                                                                                                                                                                                                                                                                                                                                                                                                                                                                                                                                                                                                                                                                                                                                                                                                                                                                                                                                                                                                                                                                                                                                                                                                                                                                                                                                                                                                                                                                                                                                                                                                                                           | 0.27857  | 2.20554  |         |          |   |         |         |          |   |         |         |         |   |         |          |          |   |         |         |          |   |         |         |          |   |         |          |          |   |         |         |          |   |         |         |         |   |         |          |          |   |         |         |         |   |         |         |         |   |         |         |         |   |          |         |         |   |          |         |         |   |         |         |         |   |         |         |         |   |          |          |         |   |         |          |         |   |         |         |         |   |         |          |          |   |         |          |          |   |         |          |          |   |         |          |          |   |         |          |          |   |         |          |          |   |          |          |          |   |          |          |          |   |          |          |          |   |          |          |          |   |          |         |         |   |          |         |         |   |          |         |         |   |          |         |         |   |          |         |         |   |          |          |         |   |          |          |          |   |          |          |         |   |          |          |         |   |          |          |         |                                                                                                                                                                                                                      |                                                                                                                                                                                                                                                                                                                                                                                                                                                                                                                                                                                                                                                                                                                                                                                                                                                                                                                                                                                                                                                                                                                                                                                                                                                                                                                                                                                                                                                                                                                                                                                                                                                                                                                                                                                                                                                                                                                                                                                                                                                                                                                                                                                                                                                                                                                                                                                                                                                                                                                                                                                                                                                                                                                                                                                                                                                                                                                                         |         |          |         |          |         |          |         |          |         |          |                                                                                                                                                                                                                        |                                                                                                                                                                                                                                                                                                                                                                                                                                                                                                                                                                                                                                                                                                                                                                                                                                                                                                                                                                                                                                                                                                                                                                                                                                                                                                                                                                                                                                                                                                                                                                                                                                                                                                                                                                                                                                                                                                                                                                                                                                                                                                                                                                                                                                                                                                                                                                                                                                                                                                                                                                                                                                                                                                                                                                                                                                                                                                                                                                                                                                                                                                                                                           |   |         |         |          |   |          |         |          |   |          |         |          |   |         |         |          |   |          |         |          |   |          |         |          |   |         |          |          |   |         |         |          |   |         |         |         |   |          |         |          |   |         |          |         |   |         |          |         |   |         |         |         |   |          |          |         |   |          |          |         |   |         |         |         |   |         |         |         |   |          |          |          |   |         |          |          |   |         |          |          |   |          |          |          |   |          |          |          |   |          |          |          |   |          |          |          |   |          |          |          |   |          |          |          |   |          |          |          |   |          |          |          |   |          |          |          |   |          |          |          |   |          |          |         |   |          |          |          |   |          |          |         |   |          |          |         |   |          |          |         |   |          |          |         |   |          |          |         |   |          |          |          |   |          |          |         |   |          |         |         |   |          |         |         |   |          |         |          |   |          |         |         |
| C                                                                                                                                                                                                                      | -0.75862                                                                                                                                                                                                                                                                                                                                                                                                                                                                                                                                                                                                                                                                                                                                                                                                                                                                                                                                                                                                                                                                                                                                                                                                                                                                                                                                                                                                                                                                                                                                                                                                                                                                                                                                                                                                                                                                                                                                                                                                                                                                                                                                                                                                                                                                                                                                                                                                                                                                                                                                                                                                                                                                                                                                                                                                                                                                                                                                                                                                                                                                                                                                           | 0.11848  | 3.58424  |         |          |   |         |         |          |   |         |         |         |   |         |          |          |   |         |         |          |   |         |         |          |   |         |          |          |   |         |         |          |   |         |         |         |   |         |          |          |   |         |         |         |   |         |         |         |   |         |         |         |   |          |         |         |   |          |         |         |   |         |         |         |   |         |         |         |   |          |          |         |   |         |          |         |   |         |         |         |   |         |          |          |   |         |          |          |   |         |          |          |   |         |          |          |   |         |          |          |   |         |          |          |   |          |          |          |   |          |          |          |   |          |          |          |   |          |          |          |   |          |         |         |   |          |         |         |   |          |         |         |   |          |         |         |   |          |         |         |   |          |          |         |   |          |          |          |   |          |          |         |   |          |          |         |   |          |          |         |                                                                                                                                                                                                                      |                                                                                                                                                                                                                                                                                                                                                                                                                                                                                                                                                                                                                                                                                                                                                                                                                                                                                                                                                                                                                                                                                                                                                                                                                                                                                                                                                                                                                                                                                                                                                                                                                                                                                                                                                                                                                                                                                                                                                                                                                                                                                                                                                                                                                                                                                                                                                                                                                                                                                                                                                                                                                                                                                                                                                                                                                                                                                                                                         |         |          |         |          |         |          |         |          |         |          |                                                                                                                                                                                                                        |                                                                                                                                                                                                                                                                                                                                                                                                                                                                                                                                                                                                                                                                                                                                                                                                                                                                                                                                                                                                                                                                                                                                                                                                                                                                                                                                                                                                                                                                                                                                                                                                                                                                                                                                                                                                                                                                                                                                                                                                                                                                                                                                                                                                                                                                                                                                                                                                                                                                                                                                                                                                                                                                                                                                                                                                                                                                                                                                                                                                                                                                                                                                                           |   |         |         |          |   |          |         |          |   |          |         |          |   |         |         |          |   |          |         |          |   |          |         |          |   |         |          |          |   |         |         |          |   |         |         |         |   |          |         |          |   |         |          |         |   |         |          |         |   |         |         |         |   |          |          |         |   |          |          |         |   |         |         |         |   |         |         |         |   |          |          |          |   |         |          |          |   |         |          |          |   |          |          |          |   |          |          |          |   |          |          |          |   |          |          |          |   |          |          |          |   |          |          |          |   |          |          |          |   |          |          |          |   |          |          |          |   |          |          |          |   |          |          |         |   |          |          |          |   |          |          |         |   |          |          |         |   |          |          |         |   |          |          |         |   |          |          |         |   |          |          |          |   |          |          |         |   |          |         |         |   |          |         |         |   |          |         |          |   |          |         |         |
| C                                                                                                                                                                                                                      | 1.57578                                                                                                                                                                                                                                                                                                                                                                                                                                                                                                                                                                                                                                                                                                                                                                                                                                                                                                                                                                                                                                                                                                                                                                                                                                                                                                                                                                                                                                                                                                                                                                                                                                                                                                                                                                                                                                                                                                                                                                                                                                                                                                                                                                                                                                                                                                                                                                                                                                                                                                                                                                                                                                                                                                                                                                                                                                                                                                                                                                                                                                                                                                                                            | 0.50759  | 3.98577  |         |          |   |         |         |          |   |         |         |         |   |         |          |          |   |         |         |          |   |         |         |          |   |         |          |          |   |         |         |          |   |         |         |         |   |         |          |          |   |         |         |         |   |         |         |         |   |         |         |         |   |          |         |         |   |          |         |         |   |         |         |         |   |         |         |         |   |          |          |         |   |         |          |         |   |         |         |         |   |         |          |          |   |         |          |          |   |         |          |          |   |         |          |          |   |         |          |          |   |         |          |          |   |          |          |          |   |          |          |          |   |          |          |          |   |          |          |          |   |          |         |         |   |          |         |         |   |          |         |         |   |          |         |         |   |          |         |         |   |          |          |         |   |          |          |          |   |          |          |         |   |          |          |         |   |          |          |         |                                                                                                                                                                                                                      |                                                                                                                                                                                                                                                                                                                                                                                                                                                                                                                                                                                                                                                                                                                                                                                                                                                                                                                                                                                                                                                                                                                                                                                                                                                                                                                                                                                                                                                                                                                                                                                                                                                                                                                                                                                                                                                                                                                                                                                                                                                                                                                                                                                                                                                                                                                                                                                                                                                                                                                                                                                                                                                                                                                                                                                                                                                                                                                                         |         |          |         |          |         |          |         |          |         |          |                                                                                                                                                                                                                        |                                                                                                                                                                                                                                                                                                                                                                                                                                                                                                                                                                                                                                                                                                                                                                                                                                                                                                                                                                                                                                                                                                                                                                                                                                                                                                                                                                                                                                                                                                                                                                                                                                                                                                                                                                                                                                                                                                                                                                                                                                                                                                                                                                                                                                                                                                                                                                                                                                                                                                                                                                                                                                                                                                                                                                                                                                                                                                                                                                                                                                                                                                                                                           |   |         |         |          |   |          |         |          |   |          |         |          |   |         |         |          |   |          |         |          |   |          |         |          |   |         |          |          |   |         |         |          |   |         |         |         |   |          |         |          |   |         |          |         |   |         |          |         |   |         |         |         |   |          |          |         |   |          |          |         |   |         |         |         |   |         |         |         |   |          |          |          |   |         |          |          |   |         |          |          |   |          |          |          |   |          |          |          |   |          |          |          |   |          |          |          |   |          |          |          |   |          |          |          |   |          |          |          |   |          |          |          |   |          |          |          |   |          |          |          |   |          |          |         |   |          |          |          |   |          |          |         |   |          |          |         |   |          |          |         |   |          |          |         |   |          |          |         |   |          |          |          |   |          |          |         |   |          |         |         |   |          |         |         |   |          |         |          |   |          |         |         |
| H                                                                                                                                                                                                                      | 2.75352                                                                                                                                                                                                                                                                                                                                                                                                                                                                                                                                                                                                                                                                                                                                                                                                                                                                                                                                                                                                                                                                                                                                                                                                                                                                                                                                                                                                                                                                                                                                                                                                                                                                                                                                                                                                                                                                                                                                                                                                                                                                                                                                                                                                                                                                                                                                                                                                                                                                                                                                                                                                                                                                                                                                                                                                                                                                                                                                                                                                                                                                                                                                            | 0.86071  | 2.23144  |         |          |   |         |         |          |   |         |         |         |   |         |          |          |   |         |         |          |   |         |         |          |   |         |          |          |   |         |         |          |   |         |         |         |   |         |          |          |   |         |         |         |   |         |         |         |   |         |         |         |   |          |         |         |   |          |         |         |   |         |         |         |   |         |         |         |   |          |          |         |   |         |          |         |   |         |         |         |   |         |          |          |   |         |          |          |   |         |          |          |   |         |          |          |   |         |          |          |   |         |          |          |   |          |          |          |   |          |          |          |   |          |          |          |   |          |          |          |   |          |         |         |   |          |         |         |   |          |         |         |   |          |         |         |   |          |         |         |   |          |          |         |   |          |          |          |   |          |          |         |   |          |          |         |   |          |          |         |                                                                                                                                                                                                                      |                                                                                                                                                                                                                                                                                                                                                                                                                                                                                                                                                                                                                                                                                                                                                                                                                                                                                                                                                                                                                                                                                                                                                                                                                                                                                                                                                                                                                                                                                                                                                                                                                                                                                                                                                                                                                                                                                                                                                                                                                                                                                                                                                                                                                                                                                                                                                                                                                                                                                                                                                                                                                                                                                                                                                                                                                                                                                                                                         |         |          |         |          |         |          |         |          |         |          |                                                                                                                                                                                                                        |                                                                                                                                                                                                                                                                                                                                                                                                                                                                                                                                                                                                                                                                                                                                                                                                                                                                                                                                                                                                                                                                                                                                                                                                                                                                                                                                                                                                                                                                                                                                                                                                                                                                                                                                                                                                                                                                                                                                                                                                                                                                                                                                                                                                                                                                                                                                                                                                                                                                                                                                                                                                                                                                                                                                                                                                                                                                                                                                                                                                                                                                                                                                                           |   |         |         |          |   |          |         |          |   |          |         |          |   |         |         |          |   |          |         |          |   |          |         |          |   |         |          |          |   |         |         |          |   |         |         |         |   |          |         |          |   |         |          |         |   |         |          |         |   |         |         |         |   |          |          |         |   |          |          |         |   |         |         |         |   |         |         |         |   |          |          |          |   |         |          |          |   |         |          |          |   |          |          |          |   |          |          |          |   |          |          |          |   |          |          |          |   |          |          |          |   |          |          |          |   |          |          |          |   |          |          |          |   |          |          |          |   |          |          |          |   |          |          |         |   |          |          |          |   |          |          |         |   |          |          |         |   |          |          |         |   |          |          |         |   |          |          |         |   |          |          |          |   |          |          |         |   |          |         |         |   |          |         |         |   |          |         |          |   |          |         |         |
| H                                                                                                                                                                                                                      | -1.74965                                                                                                                                                                                                                                                                                                                                                                                                                                                                                                                                                                                                                                                                                                                                                                                                                                                                                                                                                                                                                                                                                                                                                                                                                                                                                                                                                                                                                                                                                                                                                                                                                                                                                                                                                                                                                                                                                                                                                                                                                                                                                                                                                                                                                                                                                                                                                                                                                                                                                                                                                                                                                                                                                                                                                                                                                                                                                                                                                                                                                                                                                                                                           | -0.08401 | 3.96964  |         |          |   |         |         |          |   |         |         |         |   |         |          |          |   |         |         |          |   |         |         |          |   |         |          |          |   |         |         |          |   |         |         |         |   |         |          |          |   |         |         |         |   |         |         |         |   |         |         |         |   |          |         |         |   |          |         |         |   |         |         |         |   |         |         |         |   |          |          |         |   |         |          |         |   |         |         |         |   |         |          |          |   |         |          |          |   |         |          |          |   |         |          |          |   |         |          |          |   |         |          |          |   |          |          |          |   |          |          |          |   |          |          |          |   |          |          |          |   |          |         |         |   |          |         |         |   |          |         |         |   |          |         |         |   |          |         |         |   |          |          |         |   |          |          |          |   |          |          |         |   |          |          |         |   |          |          |         |                                                                                                                                                                                                                      |                                                                                                                                                                                                                                                                                                                                                                                                                                                                                                                                                                                                                                                                                                                                                                                                                                                                                                                                                                                                                                                                                                                                                                                                                                                                                                                                                                                                                                                                                                                                                                                                                                                                                                                                                                                                                                                                                                                                                                                                                                                                                                                                                                                                                                                                                                                                                                                                                                                                                                                                                                                                                                                                                                                                                                                                                                                                                                                                         |         |          |         |          |         |          |         |          |         |          |                                                                                                                                                                                                                        |                                                                                                                                                                                                                                                                                                                                                                                                                                                                                                                                                                                                                                                                                                                                                                                                                                                                                                                                                                                                                                                                                                                                                                                                                                                                                                                                                                                                                                                                                                                                                                                                                                                                                                                                                                                                                                                                                                                                                                                                                                                                                                                                                                                                                                                                                                                                                                                                                                                                                                                                                                                                                                                                                                                                                                                                                                                                                                                                                                                                                                                                                                                                                           |   |         |         |          |   |          |         |          |   |          |         |          |   |         |         |          |   |          |         |          |   |          |         |          |   |         |          |          |   |         |         |          |   |         |         |         |   |          |         |          |   |         |          |         |   |         |          |         |   |         |         |         |   |          |          |         |   |          |          |         |   |         |         |         |   |         |         |         |   |          |          |          |   |         |          |          |   |         |          |          |   |          |          |          |   |          |          |          |   |          |          |          |   |          |          |          |   |          |          |          |   |          |          |          |   |          |          |          |   |          |          |          |   |          |          |          |   |          |          |          |   |          |          |         |   |          |          |          |   |          |          |         |   |          |          |         |   |          |          |         |   |          |          |         |   |          |          |         |   |          |          |          |   |          |          |         |   |          |         |         |   |          |         |         |   |          |         |          |   |          |         |         |
| H                                                                                                                                                                                                                      | 2.41536                                                                                                                                                                                                                                                                                                                                                                                                                                                                                                                                                                                                                                                                                                                                                                                                                                                                                                                                                                                                                                                                                                                                                                                                                                                                                                                                                                                                                                                                                                                                                                                                                                                                                                                                                                                                                                                                                                                                                                                                                                                                                                                                                                                                                                                                                                                                                                                                                                                                                                                                                                                                                                                                                                                                                                                                                                                                                                                                                                                                                                                                                                                                            | 0.59780  | 4.66273  |         |          |   |         |         |          |   |         |         |         |   |         |          |          |   |         |         |          |   |         |         |          |   |         |          |          |   |         |         |          |   |         |         |         |   |         |          |          |   |         |         |         |   |         |         |         |   |         |         |         |   |          |         |         |   |          |         |         |   |         |         |         |   |         |         |         |   |          |          |         |   |         |          |         |   |         |         |         |   |         |          |          |   |         |          |          |   |         |          |          |   |         |          |          |   |         |          |          |   |         |          |          |   |          |          |          |   |          |          |          |   |          |          |          |   |          |          |          |   |          |         |         |   |          |         |         |   |          |         |         |   |          |         |         |   |          |         |         |   |          |          |         |   |          |          |          |   |          |          |         |   |          |          |         |   |          |          |         |                                                                                                                                                                                                                      |                                                                                                                                                                                                                                                                                                                                                                                                                                                                                                                                                                                                                                                                                                                                                                                                                                                                                                                                                                                                                                                                                                                                                                                                                                                                                                                                                                                                                                                                                                                                                                                                                                                                                                                                                                                                                                                                                                                                                                                                                                                                                                                                                                                                                                                                                                                                                                                                                                                                                                                                                                                                                                                                                                                                                                                                                                                                                                                                         |         |          |         |          |         |          |         |          |         |          |                                                                                                                                                                                                                        |                                                                                                                                                                                                                                                                                                                                                                                                                                                                                                                                                                                                                                                                                                                                                                                                                                                                                                                                                                                                                                                                                                                                                                                                                                                                                                                                                                                                                                                                                                                                                                                                                                                                                                                                                                                                                                                                                                                                                                                                                                                                                                                                                                                                                                                                                                                                                                                                                                                                                                                                                                                                                                                                                                                                                                                                                                                                                                                                                                                                                                                                                                                                                           |   |         |         |          |   |          |         |          |   |          |         |          |   |         |         |          |   |          |         |          |   |          |         |          |   |         |          |          |   |         |         |          |   |         |         |         |   |          |         |          |   |         |          |         |   |         |          |         |   |         |         |         |   |          |          |         |   |          |          |         |   |         |         |         |   |         |         |         |   |          |          |          |   |         |          |          |   |         |          |          |   |          |          |          |   |          |          |          |   |          |          |          |   |          |          |          |   |          |          |          |   |          |          |          |   |          |          |          |   |          |          |          |   |          |          |          |   |          |          |          |   |          |          |         |   |          |          |          |   |          |          |         |   |          |          |         |   |          |          |         |   |          |          |         |   |          |          |         |   |          |          |          |   |          |          |         |   |          |         |         |   |          |         |         |   |          |         |          |   |          |         |         |
| H                                                                                                                                                                                                                      | 0.13774                                                                                                                                                                                                                                                                                                                                                                                                                                                                                                                                                                                                                                                                                                                                                                                                                                                                                                                                                                                                                                                                                                                                                                                                                                                                                                                                                                                                                                                                                                                                                                                                                                                                                                                                                                                                                                                                                                                                                                                                                                                                                                                                                                                                                                                                                                                                                                                                                                                                                                                                                                                                                                                                                                                                                                                                                                                                                                                                                                                                                                                                                                                                            | 0.09231  | 5.53283  |         |          |   |         |         |          |   |         |         |         |   |         |          |          |   |         |         |          |   |         |         |          |   |         |          |          |   |         |         |          |   |         |         |         |   |         |          |          |   |         |         |         |   |         |         |         |   |         |         |         |   |          |         |         |   |          |         |         |   |         |         |         |   |         |         |         |   |          |          |         |   |         |          |         |   |         |         |         |   |         |          |          |   |         |          |          |   |         |          |          |   |         |          |          |   |         |          |          |   |         |          |          |   |          |          |          |   |          |          |          |   |          |          |          |   |          |          |          |   |          |         |         |   |          |         |         |   |          |         |         |   |          |         |         |   |          |         |         |   |          |          |         |   |          |          |          |   |          |          |         |   |          |          |         |   |          |          |         |                                                                                                                                                                                                                      |                                                                                                                                                                                                                                                                                                                                                                                                                                                                                                                                                                                                                                                                                                                                                                                                                                                                                                                                                                                                                                                                                                                                                                                                                                                                                                                                                                                                                                                                                                                                                                                                                                                                                                                                                                                                                                                                                                                                                                                                                                                                                                                                                                                                                                                                                                                                                                                                                                                                                                                                                                                                                                                                                                                                                                                                                                                                                                                                         |         |          |         |          |         |          |         |          |         |          |                                                                                                                                                                                                                        |                                                                                                                                                                                                                                                                                                                                                                                                                                                                                                                                                                                                                                                                                                                                                                                                                                                                                                                                                                                                                                                                                                                                                                                                                                                                                                                                                                                                                                                                                                                                                                                                                                                                                                                                                                                                                                                                                                                                                                                                                                                                                                                                                                                                                                                                                                                                                                                                                                                                                                                                                                                                                                                                                                                                                                                                                                                                                                                                                                                                                                                                                                                                                           |   |         |         |          |   |          |         |          |   |          |         |          |   |         |         |          |   |          |         |          |   |          |         |          |   |         |          |          |   |         |         |          |   |         |         |         |   |          |         |          |   |         |          |         |   |         |          |         |   |         |         |         |   |          |          |         |   |          |          |         |   |         |         |         |   |         |         |         |   |          |          |          |   |         |          |          |   |         |          |          |   |          |          |          |   |          |          |          |   |          |          |          |   |          |          |          |   |          |          |          |   |          |          |          |   |          |          |          |   |          |          |          |   |          |          |          |   |          |          |          |   |          |          |         |   |          |          |          |   |          |          |         |   |          |          |         |   |          |          |         |   |          |          |         |   |          |          |         |   |          |          |          |   |          |          |         |   |          |         |         |   |          |         |         |   |          |         |          |   |          |         |         |
| C                                                                                                                                                                                                                      | 0.44683                                                                                                                                                                                                                                                                                                                                                                                                                                                                                                                                                                                                                                                                                                                                                                                                                                                                                                                                                                                                                                                                                                                                                                                                                                                                                                                                                                                                                                                                                                                                                                                                                                                                                                                                                                                                                                                                                                                                                                                                                                                                                                                                                                                                                                                                                                                                                                                                                                                                                                                                                                                                                                                                                                                                                                                                                                                                                                                                                                                                                                                                                                                                            | -1.27011 | -2.96921 |         |          |   |         |         |          |   |         |         |         |   |         |          |          |   |         |         |          |   |         |         |          |   |         |          |          |   |         |         |          |   |         |         |         |   |         |          |          |   |         |         |         |   |         |         |         |   |         |         |         |   |          |         |         |   |          |         |         |   |         |         |         |   |         |         |         |   |          |          |         |   |         |          |         |   |         |         |         |   |         |          |          |   |         |          |          |   |         |          |          |   |         |          |          |   |         |          |          |   |         |          |          |   |          |          |          |   |          |          |          |   |          |          |          |   |          |          |          |   |          |         |         |   |          |         |         |   |          |         |         |   |          |         |         |   |          |         |         |   |          |          |         |   |          |          |          |   |          |          |         |   |          |          |         |   |          |          |         |                                                                                                                                                                                                                      |                                                                                                                                                                                                                                                                                                                                                                                                                                                                                                                                                                                                                                                                                                                                                                                                                                                                                                                                                                                                                                                                                                                                                                                                                                                                                                                                                                                                                                                                                                                                                                                                                                                                                                                                                                                                                                                                                                                                                                                                                                                                                                                                                                                                                                                                                                                                                                                                                                                                                                                                                                                                                                                                                                                                                                                                                                                                                                                                         |         |          |         |          |         |          |         |          |         |          |                                                                                                                                                                                                                        |                                                                                                                                                                                                                                                                                                                                                                                                                                                                                                                                                                                                                                                                                                                                                                                                                                                                                                                                                                                                                                                                                                                                                                                                                                                                                                                                                                                                                                                                                                                                                                                                                                                                                                                                                                                                                                                                                                                                                                                                                                                                                                                                                                                                                                                                                                                                                                                                                                                                                                                                                                                                                                                                                                                                                                                                                                                                                                                                                                                                                                                                                                                                                           |   |         |         |          |   |          |         |          |   |          |         |          |   |         |         |          |   |          |         |          |   |          |         |          |   |         |          |          |   |         |         |          |   |         |         |         |   |          |         |          |   |         |          |         |   |         |          |         |   |         |         |         |   |          |          |         |   |          |          |         |   |         |         |         |   |         |         |         |   |          |          |          |   |         |          |          |   |         |          |          |   |          |          |          |   |          |          |          |   |          |          |          |   |          |          |          |   |          |          |          |   |          |          |          |   |          |          |          |   |          |          |          |   |          |          |          |   |          |          |          |   |          |          |         |   |          |          |          |   |          |          |         |   |          |          |         |   |          |          |         |   |          |          |         |   |          |          |         |   |          |          |          |   |          |          |         |   |          |         |         |   |          |         |         |   |          |         |          |   |          |         |         |
| H                                                                                                                                                                                                                      | 0.76282                                                                                                                                                                                                                                                                                                                                                                                                                                                                                                                                                                                                                                                                                                                                                                                                                                                                                                                                                                                                                                                                                                                                                                                                                                                                                                                                                                                                                                                                                                                                                                                                                                                                                                                                                                                                                                                                                                                                                                                                                                                                                                                                                                                                                                                                                                                                                                                                                                                                                                                                                                                                                                                                                                                                                                                                                                                                                                                                                                                                                                                                                                                                            | -0.97042 | -3.97237 |         |          |   |         |         |          |   |         |         |         |   |         |          |          |   |         |         |          |   |         |         |          |   |         |          |          |   |         |         |          |   |         |         |         |   |         |          |          |   |         |         |         |   |         |         |         |   |         |         |         |   |          |         |         |   |          |         |         |   |         |         |         |   |         |         |         |   |          |          |         |   |         |          |         |   |         |         |         |   |         |          |          |   |         |          |          |   |         |          |          |   |         |          |          |   |         |          |          |   |         |          |          |   |          |          |          |   |          |          |          |   |          |          |          |   |          |          |          |   |          |         |         |   |          |         |         |   |          |         |         |   |          |         |         |   |          |         |         |   |          |          |         |   |          |          |          |   |          |          |         |   |          |          |         |   |          |          |         |                                                                                                                                                                                                                      |                                                                                                                                                                                                                                                                                                                                                                                                                                                                                                                                                                                                                                                                                                                                                                                                                                                                                                                                                                                                                                                                                                                                                                                                                                                                                                                                                                                                                                                                                                                                                                                                                                                                                                                                                                                                                                                                                                                                                                                                                                                                                                                                                                                                                                                                                                                                                                                                                                                                                                                                                                                                                                                                                                                                                                                                                                                                                                                                         |         |          |         |          |         |          |         |          |         |          |                                                                                                                                                                                                                        |                                                                                                                                                                                                                                                                                                                                                                                                                                                                                                                                                                                                                                                                                                                                                                                                                                                                                                                                                                                                                                                                                                                                                                                                                                                                                                                                                                                                                                                                                                                                                                                                                                                                                                                                                                                                                                                                                                                                                                                                                                                                                                                                                                                                                                                                                                                                                                                                                                                                                                                                                                                                                                                                                                                                                                                                                                                                                                                                                                                                                                                                                                                                                           |   |         |         |          |   |          |         |          |   |          |         |          |   |         |         |          |   |          |         |          |   |          |         |          |   |         |          |          |   |         |         |          |   |         |         |         |   |          |         |          |   |         |          |         |   |         |          |         |   |         |         |         |   |          |          |         |   |          |          |         |   |         |         |         |   |         |         |         |   |          |          |          |   |         |          |          |   |         |          |          |   |          |          |          |   |          |          |          |   |          |          |          |   |          |          |          |   |          |          |          |   |          |          |          |   |          |          |          |   |          |          |          |   |          |          |          |   |          |          |          |   |          |          |         |   |          |          |          |   |          |          |         |   |          |          |         |   |          |          |         |   |          |          |         |   |          |          |         |   |          |          |          |   |          |          |         |   |          |         |         |   |          |         |         |   |          |         |          |   |          |         |         |
| C                                                                                                                                                                                                                      | 1.09850                                                                                                                                                                                                                                                                                                                                                                                                                                                                                                                                                                                                                                                                                                                                                                                                                                                                                                                                                                                                                                                                                                                                                                                                                                                                                                                                                                                                                                                                                                                                                                                                                                                                                                                                                                                                                                                                                                                                                                                                                                                                                                                                                                                                                                                                                                                                                                                                                                                                                                                                                                                                                                                                                                                                                                                                                                                                                                                                                                                                                                                                                                                                            | -2.62139 | -2.64750 |         |          |   |         |         |          |   |         |         |         |   |         |          |          |   |         |         |          |   |         |         |          |   |         |          |          |   |         |         |          |   |         |         |         |   |         |          |          |   |         |         |         |   |         |         |         |   |         |         |         |   |          |         |         |   |          |         |         |   |         |         |         |   |         |         |         |   |          |          |         |   |         |          |         |   |         |         |         |   |         |          |          |   |         |          |          |   |         |          |          |   |         |          |          |   |         |          |          |   |         |          |          |   |          |          |          |   |          |          |          |   |          |          |          |   |          |          |          |   |          |         |         |   |          |         |         |   |          |         |         |   |          |         |         |   |          |         |         |   |          |          |         |   |          |          |          |   |          |          |         |   |          |          |         |   |          |          |         |                                                                                                                                                                                                                      |                                                                                                                                                                                                                                                                                                                                                                                                                                                                                                                                                                                                                                                                                                                                                                                                                                                                                                                                                                                                                                                                                                                                                                                                                                                                                                                                                                                                                                                                                                                                                                                                                                                                                                                                                                                                                                                                                                                                                                                                                                                                                                                                                                                                                                                                                                                                                                                                                                                                                                                                                                                                                                                                                                                                                                                                                                                                                                                                         |         |          |         |          |         |          |         |          |         |          |                                                                                                                                                                                                                        |                                                                                                                                                                                                                                                                                                                                                                                                                                                                                                                                                                                                                                                                                                                                                                                                                                                                                                                                                                                                                                                                                                                                                                                                                                                                                                                                                                                                                                                                                                                                                                                                                                                                                                                                                                                                                                                                                                                                                                                                                                                                                                                                                                                                                                                                                                                                                                                                                                                                                                                                                                                                                                                                                                                                                                                                                                                                                                                                                                                                                                                                                                                                                           |   |         |         |          |   |          |         |          |   |          |         |          |   |         |         |          |   |          |         |          |   |          |         |          |   |         |          |          |   |         |         |          |   |         |         |         |   |          |         |          |   |         |          |         |   |         |          |         |   |         |         |         |   |          |          |         |   |          |          |         |   |         |         |         |   |         |         |         |   |          |          |          |   |         |          |          |   |         |          |          |   |          |          |          |   |          |          |          |   |          |          |          |   |          |          |          |   |          |          |          |   |          |          |          |   |          |          |          |   |          |          |          |   |          |          |          |   |          |          |          |   |          |          |         |   |          |          |          |   |          |          |         |   |          |          |         |   |          |          |         |   |          |          |         |   |          |          |         |   |          |          |          |   |          |          |         |   |          |         |         |   |          |         |         |   |          |         |          |   |          |         |         |
| H                                                                                                                                                                                                                      | 0.80333                                                                                                                                                                                                                                                                                                                                                                                                                                                                                                                                                                                                                                                                                                                                                                                                                                                                                                                                                                                                                                                                                                                                                                                                                                                                                                                                                                                                                                                                                                                                                                                                                                                                                                                                                                                                                                                                                                                                                                                                                                                                                                                                                                                                                                                                                                                                                                                                                                                                                                                                                                                                                                                                                                                                                                                                                                                                                                                                                                                                                                                                                                                                            | -2.95718 | -1.65054 |         |          |   |         |         |          |   |         |         |         |   |         |          |          |   |         |         |          |   |         |         |          |   |         |          |          |   |         |         |          |   |         |         |         |   |         |          |          |   |         |         |         |   |         |         |         |   |         |         |         |   |          |         |         |   |          |         |         |   |         |         |         |   |         |         |         |   |          |          |         |   |         |          |         |   |         |         |         |   |         |          |          |   |         |          |          |   |         |          |          |   |         |          |          |   |         |          |          |   |         |          |          |   |          |          |          |   |          |          |          |   |          |          |          |   |          |          |          |   |          |         |         |   |          |         |         |   |          |         |         |   |          |         |         |   |          |         |         |   |          |          |         |   |          |          |          |   |          |          |         |   |          |          |         |   |          |          |         |                                                                                                                                                                                                                      |                                                                                                                                                                                                                                                                                                                                                                                                                                                                                                                                                                                                                                                                                                                                                                                                                                                                                                                                                                                                                                                                                                                                                                                                                                                                                                                                                                                                                                                                                                                                                                                                                                                                                                                                                                                                                                                                                                                                                                                                                                                                                                                                                                                                                                                                                                                                                                                                                                                                                                                                                                                                                                                                                                                                                                                                                                                                                                                                         |         |          |         |          |         |          |         |          |         |          |                                                                                                                                                                                                                        |                                                                                                                                                                                                                                                                                                                                                                                                                                                                                                                                                                                                                                                                                                                                                                                                                                                                                                                                                                                                                                                                                                                                                                                                                                                                                                                                                                                                                                                                                                                                                                                                                                                                                                                                                                                                                                                                                                                                                                                                                                                                                                                                                                                                                                                                                                                                                                                                                                                                                                                                                                                                                                                                                                                                                                                                                                                                                                                                                                                                                                                                                                                                                           |   |         |         |          |   |          |         |          |   |          |         |          |   |         |         |          |   |          |         |          |   |          |         |          |   |         |          |          |   |         |         |          |   |         |         |         |   |          |         |          |   |         |          |         |   |         |          |         |   |         |         |         |   |          |          |         |   |          |          |         |   |         |         |         |   |         |         |         |   |          |          |          |   |         |          |          |   |         |          |          |   |          |          |          |   |          |          |          |   |          |          |          |   |          |          |          |   |          |          |          |   |          |          |          |   |          |          |          |   |          |          |          |   |          |          |          |   |          |          |          |   |          |          |         |   |          |          |          |   |          |          |         |   |          |          |         |   |          |          |         |   |          |          |         |   |          |          |         |   |          |          |          |   |          |          |         |   |          |         |         |   |          |         |         |   |          |         |          |   |          |         |         |
| H                                                                                                                                                                                                                      | 2.18738                                                                                                                                                                                                                                                                                                                                                                                                                                                                                                                                                                                                                                                                                                                                                                                                                                                                                                                                                                                                                                                                                                                                                                                                                                                                                                                                                                                                                                                                                                                                                                                                                                                                                                                                                                                                                                                                                                                                                                                                                                                                                                                                                                                                                                                                                                                                                                                                                                                                                                                                                                                                                                                                                                                                                                                                                                                                                                                                                                                                                                                                                                                                            | -2.54859 | -2.67083 |         |          |   |         |         |          |   |         |         |         |   |         |          |          |   |         |         |          |   |         |         |          |   |         |          |          |   |         |         |          |   |         |         |         |   |         |          |          |   |         |         |         |   |         |         |         |   |         |         |         |   |          |         |         |   |          |         |         |   |         |         |         |   |         |         |         |   |          |          |         |   |         |          |         |   |         |         |         |   |         |          |          |   |         |          |          |   |         |          |          |   |         |          |          |   |         |          |          |   |         |          |          |   |          |          |          |   |          |          |          |   |          |          |          |   |          |          |          |   |          |         |         |   |          |         |         |   |          |         |         |   |          |         |         |   |          |         |         |   |          |          |         |   |          |          |          |   |          |          |         |   |          |          |         |   |          |          |         |                                                                                                                                                                                                                      |                                                                                                                                                                                                                                                                                                                                                                                                                                                                                                                                                                                                                                                                                                                                                                                                                                                                                                                                                                                                                                                                                                                                                                                                                                                                                                                                                                                                                                                                                                                                                                                                                                                                                                                                                                                                                                                                                                                                                                                                                                                                                                                                                                                                                                                                                                                                                                                                                                                                                                                                                                                                                                                                                                                                                                                                                                                                                                                                         |         |          |         |          |         |          |         |          |         |          |                                                                                                                                                                                                                        |                                                                                                                                                                                                                                                                                                                                                                                                                                                                                                                                                                                                                                                                                                                                                                                                                                                                                                                                                                                                                                                                                                                                                                                                                                                                                                                                                                                                                                                                                                                                                                                                                                                                                                                                                                                                                                                                                                                                                                                                                                                                                                                                                                                                                                                                                                                                                                                                                                                                                                                                                                                                                                                                                                                                                                                                                                                                                                                                                                                                                                                                                                                                                           |   |         |         |          |   |          |         |          |   |          |         |          |   |         |         |          |   |          |         |          |   |          |         |          |   |         |          |          |   |         |         |          |   |         |         |         |   |          |         |          |   |         |          |         |   |         |          |         |   |         |         |         |   |          |          |         |   |          |          |         |   |         |         |         |   |         |         |         |   |          |          |          |   |         |          |          |   |         |          |          |   |          |          |          |   |          |          |          |   |          |          |          |   |          |          |          |   |          |          |          |   |          |          |          |   |          |          |          |   |          |          |          |   |          |          |          |   |          |          |          |   |          |          |         |   |          |          |          |   |          |          |         |   |          |          |         |   |          |          |         |   |          |          |         |   |          |          |         |   |          |          |          |   |          |          |         |   |          |         |         |   |          |         |         |   |          |         |          |   |          |         |         |
| H                                                                                                                                                                                                                      | 0.78271                                                                                                                                                                                                                                                                                                                                                                                                                                                                                                                                                                                                                                                                                                                                                                                                                                                                                                                                                                                                                                                                                                                                                                                                                                                                                                                                                                                                                                                                                                                                                                                                                                                                                                                                                                                                                                                                                                                                                                                                                                                                                                                                                                                                                                                                                                                                                                                                                                                                                                                                                                                                                                                                                                                                                                                                                                                                                                                                                                                                                                                                                                                                            | -3.37940 | -3.36828 |         |          |   |         |         |          |   |         |         |         |   |         |          |          |   |         |         |          |   |         |         |          |   |         |          |          |   |         |         |          |   |         |         |         |   |         |          |          |   |         |         |         |   |         |         |         |   |         |         |         |   |          |         |         |   |          |         |         |   |         |         |         |   |         |         |         |   |          |          |         |   |         |          |         |   |         |         |         |   |         |          |          |   |         |          |          |   |         |          |          |   |         |          |          |   |         |          |          |   |         |          |          |   |          |          |          |   |          |          |          |   |          |          |          |   |          |          |          |   |          |         |         |   |          |         |         |   |          |         |         |   |          |         |         |   |          |         |         |   |          |          |         |   |          |          |          |   |          |          |         |   |          |          |         |   |          |          |         |                                                                                                                                                                                                                      |                                                                                                                                                                                                                                                                                                                                                                                                                                                                                                                                                                                                                                                                                                                                                                                                                                                                                                                                                                                                                                                                                                                                                                                                                                                                                                                                                                                                                                                                                                                                                                                                                                                                                                                                                                                                                                                                                                                                                                                                                                                                                                                                                                                                                                                                                                                                                                                                                                                                                                                                                                                                                                                                                                                                                                                                                                                                                                                                         |         |          |         |          |         |          |         |          |         |          |                                                                                                                                                                                                                        |                                                                                                                                                                                                                                                                                                                                                                                                                                                                                                                                                                                                                                                                                                                                                                                                                                                                                                                                                                                                                                                                                                                                                                                                                                                                                                                                                                                                                                                                                                                                                                                                                                                                                                                                                                                                                                                                                                                                                                                                                                                                                                                                                                                                                                                                                                                                                                                                                                                                                                                                                                                                                                                                                                                                                                                                                                                                                                                                                                                                                                                                                                                                                           |   |         |         |          |   |          |         |          |   |          |         |          |   |         |         |          |   |          |         |          |   |          |         |          |   |         |          |          |   |         |         |          |   |         |         |         |   |          |         |          |   |         |          |         |   |         |          |         |   |         |         |         |   |          |          |         |   |          |          |         |   |         |         |         |   |         |         |         |   |          |          |          |   |         |          |          |   |         |          |          |   |          |          |          |   |          |          |          |   |          |          |          |   |          |          |          |   |          |          |          |   |          |          |          |   |          |          |          |   |          |          |          |   |          |          |          |   |          |          |          |   |          |          |         |   |          |          |          |   |          |          |         |   |          |          |         |   |          |          |         |   |          |          |         |   |          |          |         |   |          |          |          |   |          |          |         |   |          |         |         |   |          |         |         |   |          |         |          |   |          |         |         |
| C                                                                                                                                                                                                                      | -1.08232                                                                                                                                                                                                                                                                                                                                                                                                                                                                                                                                                                                                                                                                                                                                                                                                                                                                                                                                                                                                                                                                                                                                                                                                                                                                                                                                                                                                                                                                                                                                                                                                                                                                                                                                                                                                                                                                                                                                                                                                                                                                                                                                                                                                                                                                                                                                                                                                                                                                                                                                                                                                                                                                                                                                                                                                                                                                                                                                                                                                                                                                                                                                           | -1.40133 | -2.96911 |         |          |   |         |         |          |   |         |         |         |   |         |          |          |   |         |         |          |   |         |         |          |   |         |          |          |   |         |         |          |   |         |         |         |   |         |          |          |   |         |         |         |   |         |         |         |   |         |         |         |   |          |         |         |   |          |         |         |   |         |         |         |   |         |         |         |   |          |          |         |   |         |          |         |   |         |         |         |   |         |          |          |   |         |          |          |   |         |          |          |   |         |          |          |   |         |          |          |   |         |          |          |   |          |          |          |   |          |          |          |   |          |          |          |   |          |          |          |   |          |         |         |   |          |         |         |   |          |         |         |   |          |         |         |   |          |         |         |   |          |          |         |   |          |          |          |   |          |          |         |   |          |          |         |   |          |          |         |                                                                                                                                                                                                                      |                                                                                                                                                                                                                                                                                                                                                                                                                                                                                                                                                                                                                                                                                                                                                                                                                                                                                                                                                                                                                                                                                                                                                                                                                                                                                                                                                                                                                                                                                                                                                                                                                                                                                                                                                                                                                                                                                                                                                                                                                                                                                                                                                                                                                                                                                                                                                                                                                                                                                                                                                                                                                                                                                                                                                                                                                                                                                                                                         |         |          |         |          |         |          |         |          |         |          |                                                                                                                                                                                                                        |                                                                                                                                                                                                                                                                                                                                                                                                                                                                                                                                                                                                                                                                                                                                                                                                                                                                                                                                                                                                                                                                                                                                                                                                                                                                                                                                                                                                                                                                                                                                                                                                                                                                                                                                                                                                                                                                                                                                                                                                                                                                                                                                                                                                                                                                                                                                                                                                                                                                                                                                                                                                                                                                                                                                                                                                                                                                                                                                                                                                                                                                                                                                                           |   |         |         |          |   |          |         |          |   |          |         |          |   |         |         |          |   |          |         |          |   |          |         |          |   |         |          |          |   |         |         |          |   |         |         |         |   |          |         |          |   |         |          |         |   |         |          |         |   |         |         |         |   |          |          |         |   |          |          |         |   |         |         |         |   |         |         |         |   |          |          |          |   |         |          |          |   |         |          |          |   |          |          |          |   |          |          |          |   |          |          |          |   |          |          |          |   |          |          |          |   |          |          |          |   |          |          |          |   |          |          |          |   |          |          |          |   |          |          |          |   |          |          |         |   |          |          |          |   |          |          |         |   |          |          |         |   |          |          |         |   |          |          |         |   |          |          |         |   |          |          |          |   |          |          |         |   |          |         |         |   |          |         |         |   |          |         |          |   |          |         |         |
| H                                                                                                                                                                                                                      | -1.43808                                                                                                                                                                                                                                                                                                                                                                                                                                                                                                                                                                                                                                                                                                                                                                                                                                                                                                                                                                                                                                                                                                                                                                                                                                                                                                                                                                                                                                                                                                                                                                                                                                                                                                                                                                                                                                                                                                                                                                                                                                                                                                                                                                                                                                                                                                                                                                                                                                                                                                                                                                                                                                                                                                                                                                                                                                                                                                                                                                                                                                                                                                                                           | -1.70238 | -1.98074 |         |          |   |         |         |          |   |         |         |         |   |         |          |          |   |         |         |          |   |         |         |          |   |         |          |          |   |         |         |          |   |         |         |         |   |         |          |          |   |         |         |         |   |         |         |         |   |         |         |         |   |          |         |         |   |          |         |         |   |         |         |         |   |         |         |         |   |          |          |         |   |         |          |         |   |         |         |         |   |         |          |          |   |         |          |          |   |         |          |          |   |         |          |          |   |         |          |          |   |         |          |          |   |          |          |          |   |          |          |          |   |          |          |          |   |          |          |          |   |          |         |         |   |          |         |         |   |          |         |         |   |          |         |         |   |          |         |         |   |          |          |         |   |          |          |          |   |          |          |         |   |          |          |         |   |          |          |         |                                                                                                                                                                                                                      |                                                                                                                                                                                                                                                                                                                                                                                                                                                                                                                                                                                                                                                                                                                                                                                                                                                                                                                                                                                                                                                                                                                                                                                                                                                                                                                                                                                                                                                                                                                                                                                                                                                                                                                                                                                                                                                                                                                                                                                                                                                                                                                                                                                                                                                                                                                                                                                                                                                                                                                                                                                                                                                                                                                                                                                                                                                                                                                                         |         |          |         |          |         |          |         |          |         |          |                                                                                                                                                                                                                        |                                                                                                                                                                                                                                                                                                                                                                                                                                                                                                                                                                                                                                                                                                                                                                                                                                                                                                                                                                                                                                                                                                                                                                                                                                                                                                                                                                                                                                                                                                                                                                                                                                                                                                                                                                                                                                                                                                                                                                                                                                                                                                                                                                                                                                                                                                                                                                                                                                                                                                                                                                                                                                                                                                                                                                                                                                                                                                                                                                                                                                                                                                                                                           |   |         |         |          |   |          |         |          |   |          |         |          |   |         |         |          |   |          |         |          |   |          |         |          |   |         |          |          |   |         |         |          |   |         |         |         |   |          |         |          |   |         |          |         |   |         |          |         |   |         |         |         |   |          |          |         |   |          |          |         |   |         |         |         |   |         |         |         |   |          |          |          |   |         |          |          |   |         |          |          |   |          |          |          |   |          |          |          |   |          |          |          |   |          |          |          |   |          |          |          |   |          |          |          |   |          |          |          |   |          |          |          |   |          |          |          |   |          |          |          |   |          |          |         |   |          |          |          |   |          |          |         |   |          |          |         |   |          |          |         |   |          |          |         |   |          |          |         |   |          |          |          |   |          |          |         |   |          |         |         |   |          |         |         |   |          |         |          |   |          |         |         |
| H                                                                                                                                                                                                                      | -1.40159                                                                                                                                                                                                                                                                                                                                                                                                                                                                                                                                                                                                                                                                                                                                                                                                                                                                                                                                                                                                                                                                                                                                                                                                                                                                                                                                                                                                                                                                                                                                                                                                                                                                                                                                                                                                                                                                                                                                                                                                                                                                                                                                                                                                                                                                                                                                                                                                                                                                                                                                                                                                                                                                                                                                                                                                                                                                                                                                                                                                                                                                                                                                           | -2.15854 | -3.68913 |         |          |   |         |         |          |   |         |         |         |   |         |          |          |   |         |         |          |   |         |         |          |   |         |          |          |   |         |         |          |   |         |         |         |   |         |          |          |   |         |         |         |   |         |         |         |   |         |         |         |   |          |         |         |   |          |         |         |   |         |         |         |   |         |         |         |   |          |          |         |   |         |          |         |   |         |         |         |   |         |          |          |   |         |          |          |   |         |          |          |   |         |          |          |   |         |          |          |   |         |          |          |   |          |          |          |   |          |          |          |   |          |          |          |   |          |          |          |   |          |         |         |   |          |         |         |   |          |         |         |   |          |         |         |   |          |         |         |   |          |          |         |   |          |          |          |   |          |          |         |   |          |          |         |   |          |          |         |                                                                                                                                                                                                                      |                                                                                                                                                                                                                                                                                                                                                                                                                                                                                                                                                                                                                                                                                                                                                                                                                                                                                                                                                                                                                                                                                                                                                                                                                                                                                                                                                                                                                                                                                                                                                                                                                                                                                                                                                                                                                                                                                                                                                                                                                                                                                                                                                                                                                                                                                                                                                                                                                                                                                                                                                                                                                                                                                                                                                                                                                                                                                                                                         |         |          |         |          |         |          |         |          |         |          |                                                                                                                                                                                                                        |                                                                                                                                                                                                                                                                                                                                                                                                                                                                                                                                                                                                                                                                                                                                                                                                                                                                                                                                                                                                                                                                                                                                                                                                                                                                                                                                                                                                                                                                                                                                                                                                                                                                                                                                                                                                                                                                                                                                                                                                                                                                                                                                                                                                                                                                                                                                                                                                                                                                                                                                                                                                                                                                                                                                                                                                                                                                                                                                                                                                                                                                                                                                                           |   |         |         |          |   |          |         |          |   |          |         |          |   |         |         |          |   |          |         |          |   |          |         |          |   |         |          |          |   |         |         |          |   |         |         |         |   |          |         |          |   |         |          |         |   |         |          |         |   |         |         |         |   |          |          |         |   |          |          |         |   |         |         |         |   |         |         |         |   |          |          |          |   |         |          |          |   |         |          |          |   |          |          |          |   |          |          |          |   |          |          |          |   |          |          |          |   |          |          |          |   |          |          |          |   |          |          |          |   |          |          |          |   |          |          |          |   |          |          |          |   |          |          |         |   |          |          |          |   |          |          |         |   |          |          |         |   |          |          |         |   |          |          |         |   |          |          |         |   |          |          |          |   |          |          |         |   |          |         |         |   |          |         |         |   |          |         |          |   |          |         |         |
| H                                                                                                                                                                                                                      | -1.55834                                                                                                                                                                                                                                                                                                                                                                                                                                                                                                                                                                                                                                                                                                                                                                                                                                                                                                                                                                                                                                                                                                                                                                                                                                                                                                                                                                                                                                                                                                                                                                                                                                                                                                                                                                                                                                                                                                                                                                                                                                                                                                                                                                                                                                                                                                                                                                                                                                                                                                                                                                                                                                                                                                                                                                                                                                                                                                                                                                                                                                                                                                                                           | -0.45287 | -3.22546 |         |          |   |         |         |          |   |         |         |         |   |         |          |          |   |         |         |          |   |         |         |          |   |         |          |          |   |         |         |          |   |         |         |         |   |         |          |          |   |         |         |         |   |         |         |         |   |         |         |         |   |          |         |         |   |          |         |         |   |         |         |         |   |         |         |         |   |          |          |         |   |         |          |         |   |         |         |         |   |         |          |          |   |         |          |          |   |         |          |          |   |         |          |          |   |         |          |          |   |         |          |          |   |          |          |          |   |          |          |          |   |          |          |          |   |          |          |          |   |          |         |         |   |          |         |         |   |          |         |         |   |          |         |         |   |          |         |         |   |          |          |         |   |          |          |          |   |          |          |         |   |          |          |         |   |          |          |         |                                                                                                                                                                                                                      |                                                                                                                                                                                                                                                                                                                                                                                                                                                                                                                                                                                                                                                                                                                                                                                                                                                                                                                                                                                                                                                                                                                                                                                                                                                                                                                                                                                                                                                                                                                                                                                                                                                                                                                                                                                                                                                                                                                                                                                                                                                                                                                                                                                                                                                                                                                                                                                                                                                                                                                                                                                                                                                                                                                                                                                                                                                                                                                                         |         |          |         |          |         |          |         |          |         |          |                                                                                                                                                                                                                        |                                                                                                                                                                                                                                                                                                                                                                                                                                                                                                                                                                                                                                                                                                                                                                                                                                                                                                                                                                                                                                                                                                                                                                                                                                                                                                                                                                                                                                                                                                                                                                                                                                                                                                                                                                                                                                                                                                                                                                                                                                                                                                                                                                                                                                                                                                                                                                                                                                                                                                                                                                                                                                                                                                                                                                                                                                                                                                                                                                                                                                                                                                                                                           |   |         |         |          |   |          |         |          |   |          |         |          |   |         |         |          |   |          |         |          |   |          |         |          |   |         |          |          |   |         |         |          |   |         |         |         |   |          |         |          |   |         |          |         |   |         |          |         |   |         |         |         |   |          |          |         |   |          |          |         |   |         |         |         |   |         |         |         |   |          |          |          |   |         |          |          |   |         |          |          |   |          |          |          |   |          |          |          |   |          |          |          |   |          |          |          |   |          |          |          |   |          |          |          |   |          |          |          |   |          |          |          |   |          |          |          |   |          |          |          |   |          |          |         |   |          |          |          |   |          |          |         |   |          |          |         |   |          |          |         |   |          |          |         |   |          |          |         |   |          |          |          |   |          |          |         |   |          |         |         |   |          |         |         |   |          |         |          |   |          |         |         |
| C                                                                                                                                                                                                                      | -1.81844                                                                                                                                                                                                                                                                                                                                                                                                                                                                                                                                                                                                                                                                                                                                                                                                                                                                                                                                                                                                                                                                                                                                                                                                                                                                                                                                                                                                                                                                                                                                                                                                                                                                                                                                                                                                                                                                                                                                                                                                                                                                                                                                                                                                                                                                                                                                                                                                                                                                                                                                                                                                                                                                                                                                                                                                                                                                                                                                                                                                                                                                                                                                           | 0.19596  | 1.31206  |         |          |   |         |         |          |   |         |         |         |   |         |          |          |   |         |         |          |   |         |         |          |   |         |          |          |   |         |         |          |   |         |         |         |   |         |          |          |   |         |         |         |   |         |         |         |   |         |         |         |   |          |         |         |   |          |         |         |   |         |         |         |   |         |         |         |   |          |          |         |   |         |          |         |   |         |         |         |   |         |          |          |   |         |          |          |   |         |          |          |   |         |          |          |   |         |          |          |   |         |          |          |   |          |          |          |   |          |          |          |   |          |          |          |   |          |          |          |   |          |         |         |   |          |         |         |   |          |         |         |   |          |         |         |   |          |         |         |   |          |          |         |   |          |          |          |   |          |          |         |   |          |          |         |   |          |          |         |                                                                                                                                                                                                                      |                                                                                                                                                                                                                                                                                                                                                                                                                                                                                                                                                                                                                                                                                                                                                                                                                                                                                                                                                                                                                                                                                                                                                                                                                                                                                                                                                                                                                                                                                                                                                                                                                                                                                                                                                                                                                                                                                                                                                                                                                                                                                                                                                                                                                                                                                                                                                                                                                                                                                                                                                                                                                                                                                                                                                                                                                                                                                                                                         |         |          |         |          |         |          |         |          |         |          |                                                                                                                                                                                                                        |                                                                                                                                                                                                                                                                                                                                                                                                                                                                                                                                                                                                                                                                                                                                                                                                                                                                                                                                                                                                                                                                                                                                                                                                                                                                                                                                                                                                                                                                                                                                                                                                                                                                                                                                                                                                                                                                                                                                                                                                                                                                                                                                                                                                                                                                                                                                                                                                                                                                                                                                                                                                                                                                                                                                                                                                                                                                                                                                                                                                                                                                                                                                                           |   |         |         |          |   |          |         |          |   |          |         |          |   |         |         |          |   |          |         |          |   |          |         |          |   |         |          |          |   |         |         |          |   |         |         |         |   |          |         |          |   |         |          |         |   |         |          |         |   |         |         |         |   |          |          |         |   |          |          |         |   |         |         |         |   |         |         |         |   |          |          |          |   |         |          |          |   |         |          |          |   |          |          |          |   |          |          |          |   |          |          |          |   |          |          |          |   |          |          |          |   |          |          |          |   |          |          |          |   |          |          |          |   |          |          |          |   |          |          |          |   |          |          |         |   |          |          |          |   |          |          |         |   |          |          |         |   |          |          |         |   |          |          |         |   |          |          |         |   |          |          |          |   |          |          |         |   |          |         |         |   |          |         |         |   |          |         |          |   |          |         |         |
| H                                                                                                                                                                                                                      | -1.53066                                                                                                                                                                                                                                                                                                                                                                                                                                                                                                                                                                                                                                                                                                                                                                                                                                                                                                                                                                                                                                                                                                                                                                                                                                                                                                                                                                                                                                                                                                                                                                                                                                                                                                                                                                                                                                                                                                                                                                                                                                                                                                                                                                                                                                                                                                                                                                                                                                                                                                                                                                                                                                                                                                                                                                                                                                                                                                                                                                                                                                                                                                                                           | 0.48978  | 0.30459  |         |          |   |         |         |          |   |         |         |         |   |         |          |          |   |         |         |          |   |         |         |          |   |         |          |          |   |         |         |          |   |         |         |         |   |         |          |          |   |         |         |         |   |         |         |         |   |         |         |         |   |          |         |         |   |          |         |         |   |         |         |         |   |         |         |         |   |          |          |         |   |         |          |         |   |         |         |         |   |         |          |          |   |         |          |          |   |         |          |          |   |         |          |          |   |         |          |          |   |         |          |          |   |          |          |          |   |          |          |          |   |          |          |          |   |          |          |          |   |          |         |         |   |          |         |         |   |          |         |         |   |          |         |         |   |          |         |         |   |          |          |         |   |          |          |          |   |          |          |         |   |          |          |         |   |          |          |         |                                                                                                                                                                                                                      |                                                                                                                                                                                                                                                                                                                                                                                                                                                                                                                                                                                                                                                                                                                                                                                                                                                                                                                                                                                                                                                                                                                                                                                                                                                                                                                                                                                                                                                                                                                                                                                                                                                                                                                                                                                                                                                                                                                                                                                                                                                                                                                                                                                                                                                                                                                                                                                                                                                                                                                                                                                                                                                                                                                                                                                                                                                                                                                                         |         |          |         |          |         |          |         |          |         |          |                                                                                                                                                                                                                        |                                                                                                                                                                                                                                                                                                                                                                                                                                                                                                                                                                                                                                                                                                                                                                                                                                                                                                                                                                                                                                                                                                                                                                                                                                                                                                                                                                                                                                                                                                                                                                                                                                                                                                                                                                                                                                                                                                                                                                                                                                                                                                                                                                                                                                                                                                                                                                                                                                                                                                                                                                                                                                                                                                                                                                                                                                                                                                                                                                                                                                                                                                                                                           |   |         |         |          |   |          |         |          |   |          |         |          |   |         |         |          |   |          |         |          |   |          |         |          |   |         |          |          |   |         |         |          |   |         |         |         |   |          |         |          |   |         |          |         |   |         |          |         |   |         |         |         |   |          |          |         |   |          |          |         |   |         |         |         |   |         |         |         |   |          |          |          |   |         |          |          |   |         |          |          |   |          |          |          |   |          |          |          |   |          |          |          |   |          |          |          |   |          |          |          |   |          |          |          |   |          |          |          |   |          |          |          |   |          |          |          |   |          |          |          |   |          |          |         |   |          |          |          |   |          |          |         |   |          |          |         |   |          |          |         |   |          |          |         |   |          |          |         |   |          |          |          |   |          |          |         |   |          |         |         |   |          |         |         |   |          |         |          |   |          |         |         |
| C                                                                                                                                                                                                                      | -2.92079                                                                                                                                                                                                                                                                                                                                                                                                                                                                                                                                                                                                                                                                                                                                                                                                                                                                                                                                                                                                                                                                                                                                                                                                                                                                                                                                                                                                                                                                                                                                                                                                                                                                                                                                                                                                                                                                                                                                                                                                                                                                                                                                                                                                                                                                                                                                                                                                                                                                                                                                                                                                                                                                                                                                                                                                                                                                                                                                                                                                                                                                                                                                           | 1.16267  | 1.76670  |         |          |   |         |         |          |   |         |         |         |   |         |          |          |   |         |         |          |   |         |         |          |   |         |          |          |   |         |         |          |   |         |         |         |   |         |          |          |   |         |         |         |   |         |         |         |   |         |         |         |   |          |         |         |   |          |         |         |   |         |         |         |   |         |         |         |   |          |          |         |   |         |          |         |   |         |         |         |   |         |          |          |   |         |          |          |   |         |          |          |   |         |          |          |   |         |          |          |   |         |          |          |   |          |          |          |   |          |          |          |   |          |          |          |   |          |          |          |   |          |         |         |   |          |         |         |   |          |         |         |   |          |         |         |   |          |         |         |   |          |          |         |   |          |          |          |   |          |          |         |   |          |          |         |   |          |          |         |                                                                                                                                                                                                                      |                                                                                                                                                                                                                                                                                                                                                                                                                                                                                                                                                                                                                                                                                                                                                                                                                                                                                                                                                                                                                                                                                                                                                                                                                                                                                                                                                                                                                                                                                                                                                                                                                                                                                                                                                                                                                                                                                                                                                                                                                                                                                                                                                                                                                                                                                                                                                                                                                                                                                                                                                                                                                                                                                                                                                                                                                                                                                                                                         |         |          |         |          |         |          |         |          |         |          |                                                                                                                                                                                                                        |                                                                                                                                                                                                                                                                                                                                                                                                                                                                                                                                                                                                                                                                                                                                                                                                                                                                                                                                                                                                                                                                                                                                                                                                                                                                                                                                                                                                                                                                                                                                                                                                                                                                                                                                                                                                                                                                                                                                                                                                                                                                                                                                                                                                                                                                                                                                                                                                                                                                                                                                                                                                                                                                                                                                                                                                                                                                                                                                                                                                                                                                                                                                                           |   |         |         |          |   |          |         |          |   |          |         |          |   |         |         |          |   |          |         |          |   |          |         |          |   |         |          |          |   |         |         |          |   |         |         |         |   |          |         |          |   |         |          |         |   |         |          |         |   |         |         |         |   |          |          |         |   |          |          |         |   |         |         |         |   |         |         |         |   |          |          |          |   |         |          |          |   |         |          |          |   |          |          |          |   |          |          |          |   |          |          |          |   |          |          |          |   |          |          |          |   |          |          |          |   |          |          |          |   |          |          |          |   |          |          |          |   |          |          |          |   |          |          |         |   |          |          |          |   |          |          |         |   |          |          |         |   |          |          |         |   |          |          |         |   |          |          |         |   |          |          |          |   |          |          |         |   |          |         |         |   |          |         |         |   |          |         |          |   |          |         |         |
| H                                                                                                                                                                                                                      | -3.29581                                                                                                                                                                                                                                                                                                                                                                                                                                                                                                                                                                                                                                                                                                                                                                                                                                                                                                                                                                                                                                                                                                                                                                                                                                                                                                                                                                                                                                                                                                                                                                                                                                                                                                                                                                                                                                                                                                                                                                                                                                                                                                                                                                                                                                                                                                                                                                                                                                                                                                                                                                                                                                                                                                                                                                                                                                                                                                                                                                                                                                                                                                                                           | 0.89729  | 2.75738  |         |          |   |         |         |          |   |         |         |         |   |         |          |          |   |         |         |          |   |         |         |          |   |         |          |          |   |         |         |          |   |         |         |         |   |         |          |          |   |         |         |         |   |         |         |         |   |         |         |         |   |          |         |         |   |          |         |         |   |         |         |         |   |         |         |         |   |          |          |         |   |         |          |         |   |         |         |         |   |         |          |          |   |         |          |          |   |         |          |          |   |         |          |          |   |         |          |          |   |         |          |          |   |          |          |          |   |          |          |          |   |          |          |          |   |          |          |          |   |          |         |         |   |          |         |         |   |          |         |         |   |          |         |         |   |          |         |         |   |          |          |         |   |          |          |          |   |          |          |         |   |          |          |         |   |          |          |         |                                                                                                                                                                                                                      |                                                                                                                                                                                                                                                                                                                                                                                                                                                                                                                                                                                                                                                                                                                                                                                                                                                                                                                                                                                                                                                                                                                                                                                                                                                                                                                                                                                                                                                                                                                                                                                                                                                                                                                                                                                                                                                                                                                                                                                                                                                                                                                                                                                                                                                                                                                                                                                                                                                                                                                                                                                                                                                                                                                                                                                                                                                                                                                                         |         |          |         |          |         |          |         |          |         |          |                                                                                                                                                                                                                        |                                                                                                                                                                                                                                                                                                                                                                                                                                                                                                                                                                                                                                                                                                                                                                                                                                                                                                                                                                                                                                                                                                                                                                                                                                                                                                                                                                                                                                                                                                                                                                                                                                                                                                                                                                                                                                                                                                                                                                                                                                                                                                                                                                                                                                                                                                                                                                                                                                                                                                                                                                                                                                                                                                                                                                                                                                                                                                                                                                                                                                                                                                                                                           |   |         |         |          |   |          |         |          |   |          |         |          |   |         |         |          |   |          |         |          |   |          |         |          |   |         |          |          |   |         |         |          |   |         |         |         |   |          |         |          |   |         |          |         |   |         |          |         |   |         |         |         |   |          |          |         |   |          |          |         |   |         |         |         |   |         |         |         |   |          |          |          |   |         |          |          |   |         |          |          |   |          |          |          |   |          |          |          |   |          |          |          |   |          |          |          |   |          |          |          |   |          |          |          |   |          |          |          |   |          |          |          |   |          |          |          |   |          |          |          |   |          |          |         |   |          |          |          |   |          |          |         |   |          |          |         |   |          |          |         |   |          |          |         |   |          |          |         |   |          |          |          |   |          |          |         |   |          |         |         |   |          |         |         |   |          |         |          |   |          |         |         |
| H                                                                                                                                                                                                                      | -3.76067                                                                                                                                                                                                                                                                                                                                                                                                                                                                                                                                                                                                                                                                                                                                                                                                                                                                                                                                                                                                                                                                                                                                                                                                                                                                                                                                                                                                                                                                                                                                                                                                                                                                                                                                                                                                                                                                                                                                                                                                                                                                                                                                                                                                                                                                                                                                                                                                                                                                                                                                                                                                                                                                                                                                                                                                                                                                                                                                                                                                                                                                                                                                           | 1.12526  | 1.06894  |         |          |   |         |         |          |   |         |         |         |   |         |          |          |   |         |         |          |   |         |         |          |   |         |          |          |   |         |         |          |   |         |         |         |   |         |          |          |   |         |         |         |   |         |         |         |   |         |         |         |   |          |         |         |   |          |         |         |   |         |         |         |   |         |         |         |   |          |          |         |   |         |          |         |   |         |         |         |   |         |          |          |   |         |          |          |   |         |          |          |   |         |          |          |   |         |          |          |   |         |          |          |   |          |          |          |   |          |          |          |   |          |          |          |   |          |          |          |   |          |         |         |   |          |         |         |   |          |         |         |   |          |         |         |   |          |         |         |   |          |          |         |   |          |          |          |   |          |          |         |   |          |          |         |   |          |          |         |                                                                                                                                                                                                                      |                                                                                                                                                                                                                                                                                                                                                                                                                                                                                                                                                                                                                                                                                                                                                                                                                                                                                                                                                                                                                                                                                                                                                                                                                                                                                                                                                                                                                                                                                                                                                                                                                                                                                                                                                                                                                                                                                                                                                                                                                                                                                                                                                                                                                                                                                                                                                                                                                                                                                                                                                                                                                                                                                                                                                                                                                                                                                                                                         |         |          |         |          |         |          |         |          |         |          |                                                                                                                                                                                                                        |                                                                                                                                                                                                                                                                                                                                                                                                                                                                                                                                                                                                                                                                                                                                                                                                                                                                                                                                                                                                                                                                                                                                                                                                                                                                                                                                                                                                                                                                                                                                                                                                                                                                                                                                                                                                                                                                                                                                                                                                                                                                                                                                                                                                                                                                                                                                                                                                                                                                                                                                                                                                                                                                                                                                                                                                                                                                                                                                                                                                                                                                                                                                                           |   |         |         |          |   |          |         |          |   |          |         |          |   |         |         |          |   |          |         |          |   |          |         |          |   |         |          |          |   |         |         |          |   |         |         |         |   |          |         |          |   |         |          |         |   |         |          |         |   |         |         |         |   |          |          |         |   |          |          |         |   |         |         |         |   |         |         |         |   |          |          |          |   |         |          |          |   |         |          |          |   |          |          |          |   |          |          |          |   |          |          |          |   |          |          |          |   |          |          |          |   |          |          |          |   |          |          |          |   |          |          |          |   |          |          |          |   |          |          |          |   |          |          |         |   |          |          |          |   |          |          |         |   |          |          |         |   |          |          |         |   |          |          |         |   |          |          |         |   |          |          |          |   |          |          |         |   |          |         |         |   |          |         |         |   |          |         |          |   |          |         |         |
| H                                                                                                                                                                                                                      | -2.54874                                                                                                                                                                                                                                                                                                                                                                                                                                                                                                                                                                                                                                                                                                                                                                                                                                                                                                                                                                                                                                                                                                                                                                                                                                                                                                                                                                                                                                                                                                                                                                                                                                                                                                                                                                                                                                                                                                                                                                                                                                                                                                                                                                                                                                                                                                                                                                                                                                                                                                                                                                                                                                                                                                                                                                                                                                                                                                                                                                                                                                                                                                                                           | 2.18797  | 1.80833  |         |          |   |         |         |          |   |         |         |         |   |         |          |          |   |         |         |          |   |         |         |          |   |         |          |          |   |         |         |          |   |         |         |         |   |         |          |          |   |         |         |         |   |         |         |         |   |         |         |         |   |          |         |         |   |          |         |         |   |         |         |         |   |         |         |         |   |          |          |         |   |         |          |         |   |         |         |         |   |         |          |          |   |         |          |          |   |         |          |          |   |         |          |          |   |         |          |          |   |         |          |          |   |          |          |          |   |          |          |          |   |          |          |          |   |          |          |          |   |          |         |         |   |          |         |         |   |          |         |         |   |          |         |         |   |          |         |         |   |          |          |         |   |          |          |          |   |          |          |         |   |          |          |         |   |          |          |         |                                                                                                                                                                                                                      |                                                                                                                                                                                                                                                                                                                                                                                                                                                                                                                                                                                                                                                                                                                                                                                                                                                                                                                                                                                                                                                                                                                                                                                                                                                                                                                                                                                                                                                                                                                                                                                                                                                                                                                                                                                                                                                                                                                                                                                                                                                                                                                                                                                                                                                                                                                                                                                                                                                                                                                                                                                                                                                                                                                                                                                                                                                                                                                                         |         |          |         |          |         |          |         |          |         |          |                                                                                                                                                                                                                        |                                                                                                                                                                                                                                                                                                                                                                                                                                                                                                                                                                                                                                                                                                                                                                                                                                                                                                                                                                                                                                                                                                                                                                                                                                                                                                                                                                                                                                                                                                                                                                                                                                                                                                                                                                                                                                                                                                                                                                                                                                                                                                                                                                                                                                                                                                                                                                                                                                                                                                                                                                                                                                                                                                                                                                                                                                                                                                                                                                                                                                                                                                                                                           |   |         |         |          |   |          |         |          |   |          |         |          |   |         |         |          |   |          |         |          |   |          |         |          |   |         |          |          |   |         |         |          |   |         |         |         |   |          |         |          |   |         |          |         |   |         |          |         |   |         |         |         |   |          |          |         |   |          |          |         |   |         |         |         |   |         |         |         |   |          |          |          |   |         |          |          |   |         |          |          |   |          |          |          |   |          |          |          |   |          |          |          |   |          |          |          |   |          |          |          |   |          |          |          |   |          |          |          |   |          |          |          |   |          |          |          |   |          |          |          |   |          |          |         |   |          |          |          |   |          |          |         |   |          |          |         |   |          |          |         |   |          |          |         |   |          |          |         |   |          |          |          |   |          |          |         |   |          |         |         |   |          |         |         |   |          |         |          |   |          |         |         |
| C                                                                                                                                                                                                                      | -2.36273                                                                                                                                                                                                                                                                                                                                                                                                                                                                                                                                                                                                                                                                                                                                                                                                                                                                                                                                                                                                                                                                                                                                                                                                                                                                                                                                                                                                                                                                                                                                                                                                                                                                                                                                                                                                                                                                                                                                                                                                                                                                                                                                                                                                                                                                                                                                                                                                                                                                                                                                                                                                                                                                                                                                                                                                                                                                                                                                                                                                                                                                                                                                           | -1.23744 | 1.24931  |         |          |   |         |         |          |   |         |         |         |   |         |          |          |   |         |         |          |   |         |         |          |   |         |          |          |   |         |         |          |   |         |         |         |   |         |          |          |   |         |         |         |   |         |         |         |   |         |         |         |   |          |         |         |   |          |         |         |   |         |         |         |   |         |         |         |   |          |          |         |   |         |          |         |   |         |         |         |   |         |          |          |   |         |          |          |   |         |          |          |   |         |          |          |   |         |          |          |   |         |          |          |   |          |          |          |   |          |          |          |   |          |          |          |   |          |          |          |   |          |         |         |   |          |         |         |   |          |         |         |   |          |         |         |   |          |         |         |   |          |          |         |   |          |          |          |   |          |          |         |   |          |          |         |   |          |          |         |                                                                                                                                                                                                                      |                                                                                                                                                                                                                                                                                                                                                                                                                                                                                                                                                                                                                                                                                                                                                                                                                                                                                                                                                                                                                                                                                                                                                                                                                                                                                                                                                                                                                                                                                                                                                                                                                                                                                                                                                                                                                                                                                                                                                                                                                                                                                                                                                                                                                                                                                                                                                                                                                                                                                                                                                                                                                                                                                                                                                                                                                                                                                                                                         |         |          |         |          |         |          |         |          |         |          |                                                                                                                                                                                                                        |                                                                                                                                                                                                                                                                                                                                                                                                                                                                                                                                                                                                                                                                                                                                                                                                                                                                                                                                                                                                                                                                                                                                                                                                                                                                                                                                                                                                                                                                                                                                                                                                                                                                                                                                                                                                                                                                                                                                                                                                                                                                                                                                                                                                                                                                                                                                                                                                                                                                                                                                                                                                                                                                                                                                                                                                                                                                                                                                                                                                                                                                                                                                                           |   |         |         |          |   |          |         |          |   |          |         |          |   |         |         |          |   |          |         |          |   |          |         |          |   |         |          |          |   |         |         |          |   |         |         |         |   |          |         |          |   |         |          |         |   |         |          |         |   |         |         |         |   |          |          |         |   |          |          |         |   |         |         |         |   |         |         |         |   |          |          |          |   |         |          |          |   |         |          |          |   |          |          |          |   |          |          |          |   |          |          |          |   |          |          |          |   |          |          |          |   |          |          |          |   |          |          |          |   |          |          |          |   |          |          |          |   |          |          |          |   |          |          |         |   |          |          |          |   |          |          |         |   |          |          |         |   |          |          |         |   |          |          |         |   |          |          |         |   |          |          |          |   |          |          |         |   |          |         |         |   |          |         |         |   |          |         |          |   |          |         |         |
| H                                                                                                                                                                                                                      | -1.60391                                                                                                                                                                                                                                                                                                                                                                                                                                                                                                                                                                                                                                                                                                                                                                                                                                                                                                                                                                                                                                                                                                                                                                                                                                                                                                                                                                                                                                                                                                                                                                                                                                                                                                                                                                                                                                                                                                                                                                                                                                                                                                                                                                                                                                                                                                                                                                                                                                                                                                                                                                                                                                                                                                                                                                                                                                                                                                                                                                                                                                                                                                                                           | -1.93647 | 0.89238  |         |          |   |         |         |          |   |         |         |         |   |         |          |          |   |         |         |          |   |         |         |          |   |         |          |          |   |         |         |          |   |         |         |         |   |         |          |          |   |         |         |         |   |         |         |         |   |         |         |         |   |          |         |         |   |          |         |         |   |         |         |         |   |         |         |         |   |          |          |         |   |         |          |         |   |         |         |         |   |         |          |          |   |         |          |          |   |         |          |          |   |         |          |          |   |         |          |          |   |         |          |          |   |          |          |          |   |          |          |          |   |          |          |          |   |          |          |          |   |          |         |         |   |          |         |         |   |          |         |         |   |          |         |         |   |          |         |         |   |          |          |         |   |          |          |          |   |          |          |         |   |          |          |         |   |          |          |         |                                                                                                                                                                                                                      |                                                                                                                                                                                                                                                                                                                                                                                                                                                                                                                                                                                                                                                                                                                                                                                                                                                                                                                                                                                                                                                                                                                                                                                                                                                                                                                                                                                                                                                                                                                                                                                                                                                                                                                                                                                                                                                                                                                                                                                                                                                                                                                                                                                                                                                                                                                                                                                                                                                                                                                                                                                                                                                                                                                                                                                                                                                                                                                                         |         |          |         |          |         |          |         |          |         |          |                                                                                                                                                                                                                        |                                                                                                                                                                                                                                                                                                                                                                                                                                                                                                                                                                                                                                                                                                                                                                                                                                                                                                                                                                                                                                                                                                                                                                                                                                                                                                                                                                                                                                                                                                                                                                                                                                                                                                                                                                                                                                                                                                                                                                                                                                                                                                                                                                                                                                                                                                                                                                                                                                                                                                                                                                                                                                                                                                                                                                                                                                                                                                                                                                                                                                                                                                                                                           |   |         |         |          |   |          |         |          |   |          |         |          |   |         |         |          |   |          |         |          |   |          |         |          |   |         |          |          |   |         |         |          |   |         |         |         |   |          |         |          |   |         |          |         |   |         |          |         |   |         |         |         |   |          |          |         |   |          |          |         |   |         |         |         |   |         |         |         |   |          |          |          |   |         |          |          |   |         |          |          |   |          |          |          |   |          |          |          |   |          |          |          |   |          |          |          |   |          |          |          |   |          |          |          |   |          |          |          |   |          |          |          |   |          |          |          |   |          |          |          |   |          |          |         |   |          |          |          |   |          |          |         |   |          |          |         |   |          |          |         |   |          |          |         |   |          |          |         |   |          |          |          |   |          |          |         |   |          |         |         |   |          |         |         |   |          |         |          |   |          |         |         |
| H                                                                                                                                                                                                                      | -3.22534                                                                                                                                                                                                                                                                                                                                                                                                                                                                                                                                                                                                                                                                                                                                                                                                                                                                                                                                                                                                                                                                                                                                                                                                                                                                                                                                                                                                                                                                                                                                                                                                                                                                                                                                                                                                                                                                                                                                                                                                                                                                                                                                                                                                                                                                                                                                                                                                                                                                                                                                                                                                                                                                                                                                                                                                                                                                                                                                                                                                                                                                                                                                           | -1.28998 | 0.58051  |         |          |   |         |         |          |   |         |         |         |   |         |          |          |   |         |         |          |   |         |         |          |   |         |          |          |   |         |         |          |   |         |         |         |   |         |          |          |   |         |         |         |   |         |         |         |   |         |         |         |   |          |         |         |   |          |         |         |   |         |         |         |   |         |         |         |   |          |          |         |   |         |          |         |   |         |         |         |   |         |          |          |   |         |          |          |   |         |          |          |   |         |          |          |   |         |          |          |   |         |          |          |   |          |          |          |   |          |          |          |   |          |          |          |   |          |          |          |   |          |         |         |   |          |         |         |   |          |         |         |   |          |         |         |   |          |         |         |   |          |          |         |   |          |          |          |   |          |          |         |   |          |          |         |   |          |          |         |                                                                                                                                                                                                                      |                                                                                                                                                                                                                                                                                                                                                                                                                                                                                                                                                                                                                                                                                                                                                                                                                                                                                                                                                                                                                                                                                                                                                                                                                                                                                                                                                                                                                                                                                                                                                                                                                                                                                                                                                                                                                                                                                                                                                                                                                                                                                                                                                                                                                                                                                                                                                                                                                                                                                                                                                                                                                                                                                                                                                                                                                                                                                                                                         |         |          |         |          |         |          |         |          |         |          |                                                                                                                                                                                                                        |                                                                                                                                                                                                                                                                                                                                                                                                                                                                                                                                                                                                                                                                                                                                                                                                                                                                                                                                                                                                                                                                                                                                                                                                                                                                                                                                                                                                                                                                                                                                                                                                                                                                                                                                                                                                                                                                                                                                                                                                                                                                                                                                                                                                                                                                                                                                                                                                                                                                                                                                                                                                                                                                                                                                                                                                                                                                                                                                                                                                                                                                                                                                                           |   |         |         |          |   |          |         |          |   |          |         |          |   |         |         |          |   |          |         |          |   |          |         |          |   |         |          |          |   |         |         |          |   |         |         |         |   |          |         |          |   |         |          |         |   |         |          |         |   |         |         |         |   |          |          |         |   |          |          |         |   |         |         |         |   |         |         |         |   |          |          |          |   |         |          |          |   |         |          |          |   |          |          |          |   |          |          |          |   |          |          |          |   |          |          |          |   |          |          |          |   |          |          |          |   |          |          |          |   |          |          |          |   |          |          |          |   |          |          |          |   |          |          |         |   |          |          |          |   |          |          |         |   |          |          |         |   |          |          |         |   |          |          |         |   |          |          |         |   |          |          |          |   |          |          |         |   |          |         |         |   |          |         |         |   |          |         |          |   |          |         |         |
| H                                                                                                                                                                                                                      | -2.67915                                                                                                                                                                                                                                                                                                                                                                                                                                                                                                                                                                                                                                                                                                                                                                                                                                                                                                                                                                                                                                                                                                                                                                                                                                                                                                                                                                                                                                                                                                                                                                                                                                                                                                                                                                                                                                                                                                                                                                                                                                                                                                                                                                                                                                                                                                                                                                                                                                                                                                                                                                                                                                                                                                                                                                                                                                                                                                                                                                                                                                                                                                                                           | -1.56780 | 2.24172  |         |          |   |         |         |          |   |         |         |         |   |         |          |          |   |         |         |          |   |         |         |          |   |         |          |          |   |         |         |          |   |         |         |         |   |         |          |          |   |         |         |         |   |         |         |         |   |         |         |         |   |          |         |         |   |          |         |         |   |         |         |         |   |         |         |         |   |          |          |         |   |         |          |         |   |         |         |         |   |         |          |          |   |         |          |          |   |         |          |          |   |         |          |          |   |         |          |          |   |         |          |          |   |          |          |          |   |          |          |          |   |          |          |          |   |          |          |          |   |          |         |         |   |          |         |         |   |          |         |         |   |          |         |         |   |          |         |         |   |          |          |         |   |          |          |          |   |          |          |         |   |          |          |         |   |          |          |         |                                                                                                                                                                                                                      |                                                                                                                                                                                                                                                                                                                                                                                                                                                                                                                                                                                                                                                                                                                                                                                                                                                                                                                                                                                                                                                                                                                                                                                                                                                                                                                                                                                                                                                                                                                                                                                                                                                                                                                                                                                                                                                                                                                                                                                                                                                                                                                                                                                                                                                                                                                                                                                                                                                                                                                                                                                                                                                                                                                                                                                                                                                                                                                                         |         |          |         |          |         |          |         |          |         |          |                                                                                                                                                                                                                        |                                                                                                                                                                                                                                                                                                                                                                                                                                                                                                                                                                                                                                                                                                                                                                                                                                                                                                                                                                                                                                                                                                                                                                                                                                                                                                                                                                                                                                                                                                                                                                                                                                                                                                                                                                                                                                                                                                                                                                                                                                                                                                                                                                                                                                                                                                                                                                                                                                                                                                                                                                                                                                                                                                                                                                                                                                                                                                                                                                                                                                                                                                                                                           |   |         |         |          |   |          |         |          |   |          |         |          |   |         |         |          |   |          |         |          |   |          |         |          |   |         |          |          |   |         |         |          |   |         |         |         |   |          |         |          |   |         |          |         |   |         |          |         |   |         |         |         |   |          |          |         |   |          |          |         |   |         |         |         |   |         |         |         |   |          |          |          |   |         |          |          |   |         |          |          |   |          |          |          |   |          |          |          |   |          |          |          |   |          |          |          |   |          |          |          |   |          |          |          |   |          |          |          |   |          |          |          |   |          |          |          |   |          |          |          |   |          |          |         |   |          |          |          |   |          |          |         |   |          |          |         |   |          |          |         |   |          |          |         |   |          |          |         |   |          |          |          |   |          |          |         |   |          |         |         |   |          |         |         |   |          |         |          |   |          |         |         |
| H                                                                                                                                                                                                                      | -0.05430                                                                                                                                                                                                                                                                                                                                                                                                                                                                                                                                                                                                                                                                                                                                                                                                                                                                                                                                                                                                                                                                                                                                                                                                                                                                                                                                                                                                                                                                                                                                                                                                                                                                                                                                                                                                                                                                                                                                                                                                                                                                                                                                                                                                                                                                                                                                                                                                                                                                                                                                                                                                                                                                                                                                                                                                                                                                                                                                                                                                                                                                                                                                           | 2.09151  | -3.93390 |         |          |   |         |         |          |   |         |         |         |   |         |          |          |   |         |         |          |   |         |         |          |   |         |          |          |   |         |         |          |   |         |         |         |   |         |          |          |   |         |         |         |   |         |         |         |   |         |         |         |   |          |         |         |   |          |         |         |   |         |         |         |   |         |         |         |   |          |          |         |   |         |          |         |   |         |         |         |   |         |          |          |   |         |          |          |   |         |          |          |   |         |          |          |   |         |          |          |   |         |          |          |   |          |          |          |   |          |          |          |   |          |          |          |   |          |          |          |   |          |         |         |   |          |         |         |   |          |         |         |   |          |         |         |   |          |         |         |   |          |          |         |   |          |          |          |   |          |          |         |   |          |          |         |   |          |          |         |                                                                                                                                                                                                                      |                                                                                                                                                                                                                                                                                                                                                                                                                                                                                                                                                                                                                                                                                                                                                                                                                                                                                                                                                                                                                                                                                                                                                                                                                                                                                                                                                                                                                                                                                                                                                                                                                                                                                                                                                                                                                                                                                                                                                                                                                                                                                                                                                                                                                                                                                                                                                                                                                                                                                                                                                                                                                                                                                                                                                                                                                                                                                                                                         |         |          |         |          |         |          |         |          |         |          |                                                                                                                                                                                                                        |                                                                                                                                                                                                                                                                                                                                                                                                                                                                                                                                                                                                                                                                                                                                                                                                                                                                                                                                                                                                                                                                                                                                                                                                                                                                                                                                                                                                                                                                                                                                                                                                                                                                                                                                                                                                                                                                                                                                                                                                                                                                                                                                                                                                                                                                                                                                                                                                                                                                                                                                                                                                                                                                                                                                                                                                                                                                                                                                                                                                                                                                                                                                                           |   |         |         |          |   |          |         |          |   |          |         |          |   |         |         |          |   |          |         |          |   |          |         |          |   |         |          |          |   |         |         |          |   |         |         |         |   |          |         |          |   |         |          |         |   |         |          |         |   |         |         |         |   |          |          |         |   |          |          |         |   |         |         |         |   |         |         |         |   |          |          |          |   |         |          |          |   |         |          |          |   |          |          |          |   |          |          |          |   |          |          |          |   |          |          |          |   |          |          |          |   |          |          |          |   |          |          |          |   |          |          |          |   |          |          |          |   |          |          |          |   |          |          |         |   |          |          |          |   |          |          |         |   |          |          |         |   |          |          |         |   |          |          |         |   |          |          |         |   |          |          |          |   |          |          |         |   |          |         |         |   |          |         |         |   |          |         |          |   |          |         |         |
| C                                                                                                                                                                                                                      | -0.03110                                                                                                                                                                                                                                                                                                                                                                                                                                                                                                                                                                                                                                                                                                                                                                                                                                                                                                                                                                                                                                                                                                                                                                                                                                                                                                                                                                                                                                                                                                                                                                                                                                                                                                                                                                                                                                                                                                                                                                                                                                                                                                                                                                                                                                                                                                                                                                                                                                                                                                                                                                                                                                                                                                                                                                                                                                                                                                                                                                                                                                                                                                                                           | 1.81238  | -2.88747 |         |          |   |         |         |          |   |         |         |         |   |         |          |          |   |         |         |          |   |         |         |          |   |         |          |          |   |         |         |          |   |         |         |         |   |         |          |          |   |         |         |         |   |         |         |         |   |         |         |         |   |          |         |         |   |          |         |         |   |         |         |         |   |         |         |         |   |          |          |         |   |         |          |         |   |         |         |         |   |         |          |          |   |         |          |          |   |         |          |          |   |         |          |          |   |         |          |          |   |         |          |          |   |          |          |          |   |          |          |          |   |          |          |          |   |          |          |          |   |          |         |         |   |          |         |         |   |          |         |         |   |          |         |         |   |          |         |         |   |          |          |         |   |          |          |          |   |          |          |         |   |          |          |         |   |          |          |         |                                                                                                                                                                                                                      |                                                                                                                                                                                                                                                                                                                                                                                                                                                                                                                                                                                                                                                                                                                                                                                                                                                                                                                                                                                                                                                                                                                                                                                                                                                                                                                                                                                                                                                                                                                                                                                                                                                                                                                                                                                                                                                                                                                                                                                                                                                                                                                                                                                                                                                                                                                                                                                                                                                                                                                                                                                                                                                                                                                                                                                                                                                                                                                                         |         |          |         |          |         |          |         |          |         |          |                                                                                                                                                                                                                        |                                                                                                                                                                                                                                                                                                                                                                                                                                                                                                                                                                                                                                                                                                                                                                                                                                                                                                                                                                                                                                                                                                                                                                                                                                                                                                                                                                                                                                                                                                                                                                                                                                                                                                                                                                                                                                                                                                                                                                                                                                                                                                                                                                                                                                                                                                                                                                                                                                                                                                                                                                                                                                                                                                                                                                                                                                                                                                                                                                                                                                                                                                                                                           |   |         |         |          |   |          |         |          |   |          |         |          |   |         |         |          |   |          |         |          |   |          |         |          |   |         |          |          |   |         |         |          |   |         |         |         |   |          |         |          |   |         |          |         |   |         |          |         |   |         |         |         |   |          |          |         |   |          |          |         |   |         |         |         |   |         |         |         |   |          |          |          |   |         |          |          |   |         |          |          |   |          |          |          |   |          |          |          |   |          |          |          |   |          |          |          |   |          |          |          |   |          |          |          |   |          |          |          |   |          |          |          |   |          |          |          |   |          |          |          |   |          |          |         |   |          |          |          |   |          |          |         |   |          |          |         |   |          |          |         |   |          |          |         |   |          |          |         |   |          |          |          |   |          |          |         |   |          |         |         |   |          |         |         |   |          |         |          |   |          |         |         |
| C                                                                                                                                                                                                                      | 0.02614                                                                                                                                                                                                                                                                                                                                                                                                                                                                                                                                                                                                                                                                                                                                                                                                                                                                                                                                                                                                                                                                                                                                                                                                                                                                                                                                                                                                                                                                                                                                                                                                                                                                                                                                                                                                                                                                                                                                                                                                                                                                                                                                                                                                                                                                                                                                                                                                                                                                                                                                                                                                                                                                                                                                                                                                                                                                                                                                                                                                                                                                                                                                            | 1.07726  | -0.12849 |         |          |   |         |         |          |   |         |         |         |   |         |          |          |   |         |         |          |   |         |         |          |   |         |          |          |   |         |         |          |   |         |         |         |   |         |          |          |   |         |         |         |   |         |         |         |   |         |         |         |   |          |         |         |   |          |         |         |   |         |         |         |   |         |         |         |   |          |          |         |   |         |          |         |   |         |         |         |   |         |          |          |   |         |          |          |   |         |          |          |   |         |          |          |   |         |          |          |   |         |          |          |   |          |          |          |   |          |          |          |   |          |          |          |   |          |          |          |   |          |         |         |   |          |         |         |   |          |         |         |   |          |         |         |   |          |         |         |   |          |          |         |   |          |          |          |   |          |          |         |   |          |          |         |   |          |          |         |                                                                                                                                                                                                                      |                                                                                                                                                                                                                                                                                                                                                                                                                                                                                                                                                                                                                                                                                                                                                                                                                                                                                                                                                                                                                                                                                                                                                                                                                                                                                                                                                                                                                                                                                                                                                                                                                                                                                                                                                                                                                                                                                                                                                                                                                                                                                                                                                                                                                                                                                                                                                                                                                                                                                                                                                                                                                                                                                                                                                                                                                                                                                                                                         |         |          |         |          |         |          |         |          |         |          |                                                                                                                                                                                                                        |                                                                                                                                                                                                                                                                                                                                                                                                                                                                                                                                                                                                                                                                                                                                                                                                                                                                                                                                                                                                                                                                                                                                                                                                                                                                                                                                                                                                                                                                                                                                                                                                                                                                                                                                                                                                                                                                                                                                                                                                                                                                                                                                                                                                                                                                                                                                                                                                                                                                                                                                                                                                                                                                                                                                                                                                                                                                                                                                                                                                                                                                                                                                                           |   |         |         |          |   |          |         |          |   |          |         |          |   |         |         |          |   |          |         |          |   |          |         |          |   |         |          |          |   |         |         |          |   |         |         |         |   |          |         |          |   |         |          |         |   |         |          |         |   |         |         |         |   |          |          |         |   |          |          |         |   |         |         |         |   |         |         |         |   |          |          |          |   |         |          |          |   |         |          |          |   |          |          |          |   |          |          |          |   |          |          |          |   |          |          |          |   |          |          |          |   |          |          |          |   |          |          |          |   |          |          |          |   |          |          |          |   |          |          |          |   |          |          |         |   |          |          |          |   |          |          |         |   |          |          |         |   |          |          |         |   |          |          |         |   |          |          |         |   |          |          |          |   |          |          |         |   |          |         |         |   |          |         |         |   |          |         |          |   |          |         |         |
| C                                                                                                                                                                                                                      | 0.04585                                                                                                                                                                                                                                                                                                                                                                                                                                                                                                                                                                                                                                                                                                                                                                                                                                                                                                                                                                                                                                                                                                                                                                                                                                                                                                                                                                                                                                                                                                                                                                                                                                                                                                                                                                                                                                                                                                                                                                                                                                                                                                                                                                                                                                                                                                                                                                                                                                                                                                                                                                                                                                                                                                                                                                                                                                                                                                                                                                                                                                                                                                                                            | 0.47625  | -2.52393 |         |          |   |         |         |          |   |         |         |         |   |         |          |          |   |         |         |          |   |         |         |          |   |         |          |          |   |         |         |          |   |         |         |         |   |         |          |          |   |         |         |         |   |         |         |         |   |         |         |         |   |          |         |         |   |          |         |         |   |         |         |         |   |         |         |         |   |          |          |         |   |         |          |         |   |         |         |         |   |         |          |          |   |         |          |          |   |         |          |          |   |         |          |          |   |         |          |          |   |         |          |          |   |          |          |          |   |          |          |          |   |          |          |          |   |          |          |          |   |          |         |         |   |          |         |         |   |          |         |         |   |          |         |         |   |          |         |         |   |          |          |         |   |          |          |          |   |          |          |         |   |          |          |         |   |          |          |         |                                                                                                                                                                                                                      |                                                                                                                                                                                                                                                                                                                                                                                                                                                                                                                                                                                                                                                                                                                                                                                                                                                                                                                                                                                                                                                                                                                                                                                                                                                                                                                                                                                                                                                                                                                                                                                                                                                                                                                                                                                                                                                                                                                                                                                                                                                                                                                                                                                                                                                                                                                                                                                                                                                                                                                                                                                                                                                                                                                                                                                                                                                                                                                                         |         |          |         |          |         |          |         |          |         |          |                                                                                                                                                                                                                        |                                                                                                                                                                                                                                                                                                                                                                                                                                                                                                                                                                                                                                                                                                                                                                                                                                                                                                                                                                                                                                                                                                                                                                                                                                                                                                                                                                                                                                                                                                                                                                                                                                                                                                                                                                                                                                                                                                                                                                                                                                                                                                                                                                                                                                                                                                                                                                                                                                                                                                                                                                                                                                                                                                                                                                                                                                                                                                                                                                                                                                                                                                                                                           |   |         |         |          |   |          |         |          |   |          |         |          |   |         |         |          |   |          |         |          |   |          |         |          |   |         |          |          |   |         |         |          |   |         |         |         |   |          |         |          |   |         |          |         |   |         |          |         |   |         |         |         |   |          |          |         |   |          |          |         |   |         |         |         |   |         |         |         |   |          |          |          |   |         |          |          |   |         |          |          |   |          |          |          |   |          |          |          |   |          |          |          |   |          |          |          |   |          |          |          |   |          |          |          |   |          |          |          |   |          |          |          |   |          |          |          |   |          |          |          |   |          |          |         |   |          |          |          |   |          |          |         |   |          |          |         |   |          |          |         |   |          |          |         |   |          |          |         |   |          |          |          |   |          |          |         |   |          |         |         |   |          |         |         |   |          |         |          |   |          |         |         |
| C                                                                                                                                                                                                                      | -0.08577                                                                                                                                                                                                                                                                                                                                                                                                                                                                                                                                                                                                                                                                                                                                                                                                                                                                                                                                                                                                                                                                                                                                                                                                                                                                                                                                                                                                                                                                                                                                                                                                                                                                                                                                                                                                                                                                                                                                                                                                                                                                                                                                                                                                                                                                                                                                                                                                                                                                                                                                                                                                                                                                                                                                                                                                                                                                                                                                                                                                                                                                                                                                           | 2.77961  | -1.88997 |         |          |   |         |         |          |   |         |         |         |   |         |          |          |   |         |         |          |   |         |         |          |   |         |          |          |   |         |         |          |   |         |         |         |   |         |          |          |   |         |         |         |   |         |         |         |   |         |         |         |   |          |         |         |   |          |         |         |   |         |         |         |   |         |         |         |   |          |          |         |   |         |          |         |   |         |         |         |   |         |          |          |   |         |          |          |   |         |          |          |   |         |          |          |   |         |          |          |   |         |          |          |   |          |          |          |   |          |          |          |   |          |          |          |   |          |          |          |   |          |         |         |   |          |         |         |   |          |         |         |   |          |         |         |   |          |         |         |   |          |          |         |   |          |          |          |   |          |          |         |   |          |          |         |   |          |          |         |                                                                                                                                                                                                                      |                                                                                                                                                                                                                                                                                                                                                                                                                                                                                                                                                                                                                                                                                                                                                                                                                                                                                                                                                                                                                                                                                                                                                                                                                                                                                                                                                                                                                                                                                                                                                                                                                                                                                                                                                                                                                                                                                                                                                                                                                                                                                                                                                                                                                                                                                                                                                                                                                                                                                                                                                                                                                                                                                                                                                                                                                                                                                                                                         |         |          |         |          |         |          |         |          |         |          |                                                                                                                                                                                                                        |                                                                                                                                                                                                                                                                                                                                                                                                                                                                                                                                                                                                                                                                                                                                                                                                                                                                                                                                                                                                                                                                                                                                                                                                                                                                                                                                                                                                                                                                                                                                                                                                                                                                                                                                                                                                                                                                                                                                                                                                                                                                                                                                                                                                                                                                                                                                                                                                                                                                                                                                                                                                                                                                                                                                                                                                                                                                                                                                                                                                                                                                                                                                                           |   |         |         |          |   |          |         |          |   |          |         |          |   |         |         |          |   |          |         |          |   |          |         |          |   |         |          |          |   |         |         |          |   |         |         |         |   |          |         |          |   |         |          |         |   |         |          |         |   |         |         |         |   |          |          |         |   |          |          |         |   |         |         |         |   |         |         |         |   |          |          |          |   |         |          |          |   |         |          |          |   |          |          |          |   |          |          |          |   |          |          |          |   |          |          |          |   |          |          |          |   |          |          |          |   |          |          |          |   |          |          |          |   |          |          |          |   |          |          |          |   |          |          |         |   |          |          |          |   |          |          |         |   |          |          |         |   |          |          |         |   |          |          |         |   |          |          |         |   |          |          |          |   |          |          |         |   |          |         |         |   |          |         |         |   |          |         |          |   |          |         |         |
| C                                                                                                                                                                                                                      | -0.05961                                                                                                                                                                                                                                                                                                                                                                                                                                                                                                                                                                                                                                                                                                                                                                                                                                                                                                                                                                                                                                                                                                                                                                                                                                                                                                                                                                                                                                                                                                                                                                                                                                                                                                                                                                                                                                                                                                                                                                                                                                                                                                                                                                                                                                                                                                                                                                                                                                                                                                                                                                                                                                                                                                                                                                                                                                                                                                                                                                                                                                                                                                                                           | 2.42290  | -0.55238 |         |          |   |         |         |          |   |         |         |         |   |         |          |          |   |         |         |          |   |         |         |          |   |         |          |          |   |         |         |          |   |         |         |         |   |         |          |          |   |         |         |         |   |         |         |         |   |         |         |         |   |          |         |         |   |          |         |         |   |         |         |         |   |         |         |         |   |          |          |         |   |         |          |         |   |         |         |         |   |         |          |          |   |         |          |          |   |         |          |          |   |         |          |          |   |         |          |          |   |         |          |          |   |          |          |          |   |          |          |          |   |          |          |          |   |          |          |          |   |          |         |         |   |          |         |         |   |          |         |         |   |          |         |         |   |          |         |         |   |          |          |         |   |          |          |          |   |          |          |         |   |          |          |         |   |          |          |         |                                                                                                                                                                                                                      |                                                                                                                                                                                                                                                                                                                                                                                                                                                                                                                                                                                                                                                                                                                                                                                                                                                                                                                                                                                                                                                                                                                                                                                                                                                                                                                                                                                                                                                                                                                                                                                                                                                                                                                                                                                                                                                                                                                                                                                                                                                                                                                                                                                                                                                                                                                                                                                                                                                                                                                                                                                                                                                                                                                                                                                                                                                                                                                                         |         |          |         |          |         |          |         |          |         |          |                                                                                                                                                                                                                        |                                                                                                                                                                                                                                                                                                                                                                                                                                                                                                                                                                                                                                                                                                                                                                                                                                                                                                                                                                                                                                                                                                                                                                                                                                                                                                                                                                                                                                                                                                                                                                                                                                                                                                                                                                                                                                                                                                                                                                                                                                                                                                                                                                                                                                                                                                                                                                                                                                                                                                                                                                                                                                                                                                                                                                                                                                                                                                                                                                                                                                                                                                                                                           |   |         |         |          |   |          |         |          |   |          |         |          |   |         |         |          |   |          |         |          |   |          |         |          |   |         |          |          |   |         |         |          |   |         |         |         |   |          |         |          |   |         |          |         |   |         |          |         |   |         |         |         |   |          |          |         |   |          |          |         |   |         |         |         |   |         |         |         |   |          |          |          |   |         |          |          |   |         |          |          |   |          |          |          |   |          |          |          |   |          |          |          |   |          |          |          |   |          |          |          |   |          |          |          |   |          |          |          |   |          |          |          |   |          |          |          |   |          |          |          |   |          |          |         |   |          |          |          |   |          |          |         |   |          |          |         |   |          |          |         |   |          |          |         |   |          |          |         |   |          |          |          |   |          |          |         |   |          |         |         |   |          |         |         |   |          |         |          |   |          |         |         |
| C                                                                                                                                                                                                                      | 0.07051                                                                                                                                                                                                                                                                                                                                                                                                                                                                                                                                                                                                                                                                                                                                                                                                                                                                                                                                                                                                                                                                                                                                                                                                                                                                                                                                                                                                                                                                                                                                                                                                                                                                                                                                                                                                                                                                                                                                                                                                                                                                                                                                                                                                                                                                                                                                                                                                                                                                                                                                                                                                                                                                                                                                                                                                                                                                                                                                                                                                                                                                                                                                            | 0.13822  | -1.16979 |         |          |   |         |         |          |   |         |         |         |   |         |          |          |   |         |         |          |   |         |         |          |   |         |          |          |   |         |         |          |   |         |         |         |   |         |          |          |   |         |         |         |   |         |         |         |   |         |         |         |   |          |         |         |   |          |         |         |   |         |         |         |   |         |         |         |   |          |          |         |   |         |          |         |   |         |         |         |   |         |          |          |   |         |          |          |   |         |          |          |   |         |          |          |   |         |          |          |   |         |          |          |   |          |          |          |   |          |          |          |   |          |          |          |   |          |          |          |   |          |         |         |   |          |         |         |   |          |         |         |   |          |         |         |   |          |         |         |   |          |          |         |   |          |          |          |   |          |          |         |   |          |          |         |   |          |          |         |                                                                                                                                                                                                                      |                                                                                                                                                                                                                                                                                                                                                                                                                                                                                                                                                                                                                                                                                                                                                                                                                                                                                                                                                                                                                                                                                                                                                                                                                                                                                                                                                                                                                                                                                                                                                                                                                                                                                                                                                                                                                                                                                                                                                                                                                                                                                                                                                                                                                                                                                                                                                                                                                                                                                                                                                                                                                                                                                                                                                                                                                                                                                                                                         |         |          |         |          |         |          |         |          |         |          |                                                                                                                                                                                                                        |                                                                                                                                                                                                                                                                                                                                                                                                                                                                                                                                                                                                                                                                                                                                                                                                                                                                                                                                                                                                                                                                                                                                                                                                                                                                                                                                                                                                                                                                                                                                                                                                                                                                                                                                                                                                                                                                                                                                                                                                                                                                                                                                                                                                                                                                                                                                                                                                                                                                                                                                                                                                                                                                                                                                                                                                                                                                                                                                                                                                                                                                                                                                                           |   |         |         |          |   |          |         |          |   |          |         |          |   |         |         |          |   |          |         |          |   |          |         |          |   |         |          |          |   |         |         |          |   |         |         |         |   |          |         |          |   |         |          |         |   |         |          |         |   |         |         |         |   |          |          |         |   |          |          |         |   |         |         |         |   |         |         |         |   |          |          |          |   |         |          |          |   |         |          |          |   |          |          |          |   |          |          |          |   |          |          |          |   |          |          |          |   |          |          |          |   |          |          |          |   |          |          |          |   |          |          |          |   |          |          |          |   |          |          |          |   |          |          |         |   |          |          |          |   |          |          |         |   |          |          |         |   |          |          |         |   |          |          |         |   |          |          |         |   |          |          |          |   |          |          |         |   |          |         |         |   |          |         |         |   |          |         |          |   |          |         |         |
| H                                                                                                                                                                                                                      | -0.15332                                                                                                                                                                                                                                                                                                                                                                                                                                                                                                                                                                                                                                                                                                                                                                                                                                                                                                                                                                                                                                                                                                                                                                                                                                                                                                                                                                                                                                                                                                                                                                                                                                                                                                                                                                                                                                                                                                                                                                                                                                                                                                                                                                                                                                                                                                                                                                                                                                                                                                                                                                                                                                                                                                                                                                                                                                                                                                                                                                                                                                                                                                                                           | 3.82773  | -2.15266 |         |          |   |         |         |          |   |         |         |         |   |         |          |          |   |         |         |          |   |         |         |          |   |         |          |          |   |         |         |          |   |         |         |         |   |         |          |          |   |         |         |         |   |         |         |         |   |         |         |         |   |          |         |         |   |          |         |         |   |         |         |         |   |         |         |         |   |          |          |         |   |         |          |         |   |         |         |         |   |         |          |          |   |         |          |          |   |         |          |          |   |         |          |          |   |         |          |          |   |         |          |          |   |          |          |          |   |          |          |          |   |          |          |          |   |          |          |          |   |          |         |         |   |          |         |         |   |          |         |         |   |          |         |         |   |          |         |         |   |          |          |         |   |          |          |          |   |          |          |         |   |          |          |         |   |          |          |         |                                                                                                                                                                                                                      |                                                                                                                                                                                                                                                                                                                                                                                                                                                                                                                                                                                                                                                                                                                                                                                                                                                                                                                                                                                                                                                                                                                                                                                                                                                                                                                                                                                                                                                                                                                                                                                                                                                                                                                                                                                                                                                                                                                                                                                                                                                                                                                                                                                                                                                                                                                                                                                                                                                                                                                                                                                                                                                                                                                                                                                                                                                                                                                                         |         |          |         |          |         |          |         |          |         |          |                                                                                                                                                                                                                        |                                                                                                                                                                                                                                                                                                                                                                                                                                                                                                                                                                                                                                                                                                                                                                                                                                                                                                                                                                                                                                                                                                                                                                                                                                                                                                                                                                                                                                                                                                                                                                                                                                                                                                                                                                                                                                                                                                                                                                                                                                                                                                                                                                                                                                                                                                                                                                                                                                                                                                                                                                                                                                                                                                                                                                                                                                                                                                                                                                                                                                                                                                                                                           |   |         |         |          |   |          |         |          |   |          |         |          |   |         |         |          |   |          |         |          |   |          |         |          |   |         |          |          |   |         |         |          |   |         |         |         |   |          |         |          |   |         |          |         |   |         |          |         |   |         |         |         |   |          |          |         |   |          |          |         |   |         |         |         |   |         |         |         |   |          |          |          |   |         |          |          |   |         |          |          |   |          |          |          |   |          |          |          |   |          |          |          |   |          |          |          |   |          |          |          |   |          |          |          |   |          |          |          |   |          |          |          |   |          |          |          |   |          |          |          |   |          |          |         |   |          |          |          |   |          |          |         |   |          |          |         |   |          |          |         |   |          |          |         |   |          |          |         |   |          |          |          |   |          |          |         |   |          |         |         |   |          |         |         |   |          |         |          |   |          |         |         |
| H                                                                                                                                                                                                                      | -0.11552                                                                                                                                                                                                                                                                                                                                                                                                                                                                                                                                                                                                                                                                                                                                                                                                                                                                                                                                                                                                                                                                                                                                                                                                                                                                                                                                                                                                                                                                                                                                                                                                                                                                                                                                                                                                                                                                                                                                                                                                                                                                                                                                                                                                                                                                                                                                                                                                                                                                                                                                                                                                                                                                                                                                                                                                                                                                                                                                                                                                                                                                                                                                           | 3.23052  | 0.15698  |         |          |   |         |         |          |   |         |         |         |   |         |          |          |   |         |         |          |   |         |         |          |   |         |          |          |   |         |         |          |   |         |         |         |   |         |          |          |   |         |         |         |   |         |         |         |   |         |         |         |   |          |         |         |   |          |         |         |   |         |         |         |   |         |         |         |   |          |          |         |   |         |          |         |   |         |         |         |   |         |          |          |   |         |          |          |   |         |          |          |   |         |          |          |   |         |          |          |   |         |          |          |   |          |          |          |   |          |          |          |   |          |          |          |   |          |          |          |   |          |         |         |   |          |         |         |   |          |         |         |   |          |         |         |   |          |         |         |   |          |          |         |   |          |          |          |   |          |          |         |   |          |          |         |   |          |          |         |                                                                                                                                                                                                                      |                                                                                                                                                                                                                                                                                                                                                                                                                                                                                                                                                                                                                                                                                                                                                                                                                                                                                                                                                                                                                                                                                                                                                                                                                                                                                                                                                                                                                                                                                                                                                                                                                                                                                                                                                                                                                                                                                                                                                                                                                                                                                                                                                                                                                                                                                                                                                                                                                                                                                                                                                                                                                                                                                                                                                                                                                                                                                                                                         |         |          |         |          |         |          |         |          |         |          |                                                                                                                                                                                                                        |                                                                                                                                                                                                                                                                                                                                                                                                                                                                                                                                                                                                                                                                                                                                                                                                                                                                                                                                                                                                                                                                                                                                                                                                                                                                                                                                                                                                                                                                                                                                                                                                                                                                                                                                                                                                                                                                                                                                                                                                                                                                                                                                                                                                                                                                                                                                                                                                                                                                                                                                                                                                                                                                                                                                                                                                                                                                                                                                                                                                                                                                                                                                                           |   |         |         |          |   |          |         |          |   |          |         |          |   |         |         |          |   |          |         |          |   |          |         |          |   |         |          |          |   |         |         |          |   |         |         |         |   |          |         |          |   |         |          |         |   |         |          |         |   |         |         |         |   |          |          |         |   |          |          |         |   |         |         |         |   |         |         |         |   |          |          |          |   |         |          |          |   |         |          |          |   |          |          |          |   |          |          |          |   |          |          |          |   |          |          |          |   |          |          |          |   |          |          |          |   |          |          |          |   |          |          |          |   |          |          |          |   |          |          |          |   |          |          |         |   |          |          |          |   |          |          |         |   |          |          |         |   |          |          |         |   |          |          |         |   |          |          |         |   |          |          |          |   |          |          |         |   |          |         |         |   |          |         |         |   |          |         |          |   |          |         |         |
| H                                                                                                                                                                                                                      | 0.11711                                                                                                                                                                                                                                                                                                                                                                                                                                                                                                                                                                                                                                                                                                                                                                                                                                                                                                                                                                                                                                                                                                                                                                                                                                                                                                                                                                                                                                                                                                                                                                                                                                                                                                                                                                                                                                                                                                                                                                                                                                                                                                                                                                                                                                                                                                                                                                                                                                                                                                                                                                                                                                                                                                                                                                                                                                                                                                                                                                                                                                                                                                                                            | -0.90905 | -0.96426 |         |          |   |         |         |          |   |         |         |         |   |         |          |          |   |         |         |          |   |         |         |          |   |         |          |          |   |         |         |          |   |         |         |         |   |         |          |          |   |         |         |         |   |         |         |         |   |         |         |         |   |          |         |         |   |          |         |         |   |         |         |         |   |         |         |         |   |          |          |         |   |         |          |         |   |         |         |         |   |         |          |          |   |         |          |          |   |         |          |          |   |         |          |          |   |         |          |          |   |         |          |          |   |          |          |          |   |          |          |          |   |          |          |          |   |          |          |          |   |          |         |         |   |          |         |         |   |          |         |         |   |          |         |         |   |          |         |         |   |          |          |         |   |          |          |          |   |          |          |         |   |          |          |         |   |          |          |         |                                                                                                                                                                                                                      |                                                                                                                                                                                                                                                                                                                                                                                                                                                                                                                                                                                                                                                                                                                                                                                                                                                                                                                                                                                                                                                                                                                                                                                                                                                                                                                                                                                                                                                                                                                                                                                                                                                                                                                                                                                                                                                                                                                                                                                                                                                                                                                                                                                                                                                                                                                                                                                                                                                                                                                                                                                                                                                                                                                                                                                                                                                                                                                                         |         |          |         |          |         |          |         |          |         |          |                                                                                                                                                                                                                        |                                                                                                                                                                                                                                                                                                                                                                                                                                                                                                                                                                                                                                                                                                                                                                                                                                                                                                                                                                                                                                                                                                                                                                                                                                                                                                                                                                                                                                                                                                                                                                                                                                                                                                                                                                                                                                                                                                                                                                                                                                                                                                                                                                                                                                                                                                                                                                                                                                                                                                                                                                                                                                                                                                                                                                                                                                                                                                                                                                                                                                                                                                                                                           |   |         |         |          |   |          |         |          |   |          |         |          |   |         |         |          |   |          |         |          |   |          |         |          |   |         |          |          |   |         |         |          |   |         |         |         |   |          |         |          |   |         |          |         |   |         |          |         |   |         |         |         |   |          |          |         |   |          |          |         |   |         |         |         |   |         |         |         |   |          |          |          |   |         |          |          |   |         |          |          |   |          |          |          |   |          |          |          |   |          |          |          |   |          |          |          |   |          |          |          |   |          |          |          |   |          |          |          |   |          |          |          |   |          |          |          |   |          |          |          |   |          |          |         |   |          |          |          |   |          |          |         |   |          |          |         |   |          |          |         |   |          |          |         |   |          |          |         |   |          |          |          |   |          |          |         |   |          |         |         |   |          |         |         |   |          |         |          |   |          |         |         |
| C                                                                                                                                                                                                                      | 0.05248                                                                                                                                                                                                                                                                                                                                                                                                                                                                                                                                                                                                                                                                                                                                                                                                                                                                                                                                                                                                                                                                                                                                                                                                                                                                                                                                                                                                                                                                                                                                                                                                                                                                                                                                                                                                                                                                                                                                                                                                                                                                                                                                                                                                                                                                                                                                                                                                                                                                                                                                                                                                                                                                                                                                                                                                                                                                                                                                                                                                                                                                                                                                            | 0.74117  | 1.34468  |         |          |   |         |         |          |   |         |         |         |   |         |          |          |   |         |         |          |   |         |         |          |   |         |          |          |   |         |         |          |   |         |         |         |   |         |          |          |   |         |         |         |   |         |         |         |   |         |         |         |   |          |         |         |   |          |         |         |   |         |         |         |   |         |         |         |   |          |          |         |   |         |          |         |   |         |         |         |   |         |          |          |   |         |          |          |   |         |          |          |   |         |          |          |   |         |          |          |   |         |          |          |   |          |          |          |   |          |          |          |   |          |          |          |   |          |          |          |   |          |         |         |   |          |         |         |   |          |         |         |   |          |         |         |   |          |         |         |   |          |          |         |   |          |          |          |   |          |          |         |   |          |          |         |   |          |          |         |                                                                                                                                                                                                                      |                                                                                                                                                                                                                                                                                                                                                                                                                                                                                                                                                                                                                                                                                                                                                                                                                                                                                                                                                                                                                                                                                                                                                                                                                                                                                                                                                                                                                                                                                                                                                                                                                                                                                                                                                                                                                                                                                                                                                                                                                                                                                                                                                                                                                                                                                                                                                                                                                                                                                                                                                                                                                                                                                                                                                                                                                                                                                                                                         |         |          |         |          |         |          |         |          |         |          |                                                                                                                                                                                                                        |                                                                                                                                                                                                                                                                                                                                                                                                                                                                                                                                                                                                                                                                                                                                                                                                                                                                                                                                                                                                                                                                                                                                                                                                                                                                                                                                                                                                                                                                                                                                                                                                                                                                                                                                                                                                                                                                                                                                                                                                                                                                                                                                                                                                                                                                                                                                                                                                                                                                                                                                                                                                                                                                                                                                                                                                                                                                                                                                                                                                                                                                                                                                                           |   |         |         |          |   |          |         |          |   |          |         |          |   |         |         |          |   |          |         |          |   |          |         |          |   |         |          |          |   |         |         |          |   |         |         |         |   |          |         |          |   |         |          |         |   |         |          |         |   |         |         |         |   |          |          |         |   |          |          |         |   |         |         |         |   |         |         |         |   |          |          |          |   |         |          |          |   |         |          |          |   |          |          |          |   |          |          |          |   |          |          |          |   |          |          |          |   |          |          |          |   |          |          |          |   |          |          |          |   |          |          |          |   |          |          |          |   |          |          |          |   |          |          |         |   |          |          |          |   |          |          |         |   |          |          |         |   |          |          |         |   |          |          |         |   |          |          |         |   |          |          |          |   |          |          |         |   |          |         |         |   |          |         |         |   |          |         |          |   |          |         |         |
| C                                                                                                                                                                                                                      | 0.03733                                                                                                                                                                                                                                                                                                                                                                                                                                                                                                                                                                                                                                                                                                                                                                                                                                                                                                                                                                                                                                                                                                                                                                                                                                                                                                                                                                                                                                                                                                                                                                                                                                                                                                                                                                                                                                                                                                                                                                                                                                                                                                                                                                                                                                                                                                                                                                                                                                                                                                                                                                                                                                                                                                                                                                                                                                                                                                                                                                                                                                                                                                                                            | 0.42919  | 4.18049  |         |          |   |         |         |          |   |         |         |         |   |         |          |          |   |         |         |          |   |         |         |          |   |         |          |          |   |         |         |          |   |         |         |         |   |         |          |          |   |         |         |         |   |         |         |         |   |         |         |         |   |          |         |         |   |          |         |         |   |         |         |         |   |         |         |         |   |          |          |         |   |         |          |         |   |         |         |         |   |         |          |          |   |         |          |          |   |         |          |          |   |         |          |          |   |         |          |          |   |         |          |          |   |          |          |          |   |          |          |          |   |          |          |          |   |          |          |          |   |          |         |         |   |          |         |         |   |          |         |         |   |          |         |         |   |          |         |         |   |          |          |         |   |          |          |          |   |          |          |         |   |          |          |         |   |          |          |         |                                                                                                                                                                                                                      |                                                                                                                                                                                                                                                                                                                                                                                                                                                                                                                                                                                                                                                                                                                                                                                                                                                                                                                                                                                                                                                                                                                                                                                                                                                                                                                                                                                                                                                                                                                                                                                                                                                                                                                                                                                                                                                                                                                                                                                                                                                                                                                                                                                                                                                                                                                                                                                                                                                                                                                                                                                                                                                                                                                                                                                                                                                                                                                                         |         |          |         |          |         |          |         |          |         |          |                                                                                                                                                                                                                        |                                                                                                                                                                                                                                                                                                                                                                                                                                                                                                                                                                                                                                                                                                                                                                                                                                                                                                                                                                                                                                                                                                                                                                                                                                                                                                                                                                                                                                                                                                                                                                                                                                                                                                                                                                                                                                                                                                                                                                                                                                                                                                                                                                                                                                                                                                                                                                                                                                                                                                                                                                                                                                                                                                                                                                                                                                                                                                                                                                                                                                                                                                                                                           |   |         |         |          |   |          |         |          |   |          |         |          |   |         |         |          |   |          |         |          |   |          |         |          |   |         |          |          |   |         |         |          |   |         |         |         |   |          |         |          |   |         |          |         |   |         |          |         |   |         |         |         |   |          |          |         |   |          |          |         |   |         |         |         |   |         |         |         |   |          |          |          |   |         |          |          |   |         |          |          |   |          |          |          |   |          |          |          |   |          |          |          |   |          |          |          |   |          |          |          |   |          |          |          |   |          |          |          |   |          |          |          |   |          |          |          |   |          |          |          |   |          |          |         |   |          |          |          |   |          |          |         |   |          |          |         |   |          |          |         |   |          |          |         |   |          |          |         |   |          |          |          |   |          |          |         |   |          |         |         |   |          |         |         |   |          |         |          |   |          |         |         |
| C                                                                                                                                                                                                                      | 0.03243                                                                                                                                                                                                                                                                                                                                                                                                                                                                                                                                                                                                                                                                                                                                                                                                                                                                                                                                                                                                                                                                                                                                                                                                                                                                                                                                                                                                                                                                                                                                                                                                                                                                                                                                                                                                                                                                                                                                                                                                                                                                                                                                                                                                                                                                                                                                                                                                                                                                                                                                                                                                                                                                                                                                                                                                                                                                                                                                                                                                                                                                                                                                            | 1.82718  | 2.24394  |         |          |   |         |         |          |   |         |         |         |   |         |          |          |   |         |         |          |   |         |         |          |   |         |          |          |   |         |         |          |   |         |         |         |   |         |          |          |   |         |         |         |   |         |         |         |   |         |         |         |   |          |         |         |   |          |         |         |   |         |         |         |   |         |         |         |   |          |          |         |   |         |          |         |   |         |         |         |   |         |          |          |   |         |          |          |   |         |          |          |   |         |          |          |   |         |          |          |   |         |          |          |   |          |          |          |   |          |          |          |   |          |          |          |   |          |          |          |   |          |         |         |   |          |         |         |   |          |         |         |   |          |         |         |   |          |         |         |   |          |          |         |   |          |          |          |   |          |          |         |   |          |          |         |   |          |          |         |                                                                                                                                                                                                                      |                                                                                                                                                                                                                                                                                                                                                                                                                                                                                                                                                                                                                                                                                                                                                                                                                                                                                                                                                                                                                                                                                                                                                                                                                                                                                                                                                                                                                                                                                                                                                                                                                                                                                                                                                                                                                                                                                                                                                                                                                                                                                                                                                                                                                                                                                                                                                                                                                                                                                                                                                                                                                                                                                                                                                                                                                                                                                                                                         |         |          |         |          |         |          |         |          |         |          |                                                                                                                                                                                                                        |                                                                                                                                                                                                                                                                                                                                                                                                                                                                                                                                                                                                                                                                                                                                                                                                                                                                                                                                                                                                                                                                                                                                                                                                                                                                                                                                                                                                                                                                                                                                                                                                                                                                                                                                                                                                                                                                                                                                                                                                                                                                                                                                                                                                                                                                                                                                                                                                                                                                                                                                                                                                                                                                                                                                                                                                                                                                                                                                                                                                                                                                                                                                                           |   |         |         |          |   |          |         |          |   |          |         |          |   |         |         |          |   |          |         |          |   |          |         |          |   |         |          |          |   |         |         |          |   |         |         |         |   |          |         |          |   |         |          |         |   |         |          |         |   |         |         |         |   |          |          |         |   |          |          |         |   |         |         |         |   |         |         |         |   |          |          |          |   |         |          |          |   |         |          |          |   |          |          |          |   |          |          |          |   |          |          |          |   |          |          |          |   |          |          |          |   |          |          |          |   |          |          |          |   |          |          |          |   |          |          |          |   |          |          |          |   |          |          |         |   |          |          |          |   |          |          |         |   |          |          |         |   |          |          |         |   |          |          |         |   |          |          |         |   |          |          |          |   |          |          |         |   |          |         |         |   |          |         |         |   |          |         |          |   |          |         |         |
| C                                                                                                                                                                                                                      | 0.09640                                                                                                                                                                                                                                                                                                                                                                                                                                                                                                                                                                                                                                                                                                                                                                                                                                                                                                                                                                                                                                                                                                                                                                                                                                                                                                                                                                                                                                                                                                                                                                                                                                                                                                                                                                                                                                                                                                                                                                                                                                                                                                                                                                                                                                                                                                                                                                                                                                                                                                                                                                                                                                                                                                                                                                                                                                                                                                                                                                                                                                                                                                                                            | -0.55953 | 1.93556  |         |          |   |         |         |          |   |         |         |         |   |         |          |          |   |         |         |          |   |         |         |          |   |         |          |          |   |         |         |          |   |         |         |         |   |         |          |          |   |         |         |         |   |         |         |         |   |         |         |         |   |          |         |         |   |          |         |         |   |         |         |         |   |         |         |         |   |          |          |         |   |         |          |         |   |         |         |         |   |         |          |          |   |         |          |          |   |         |          |          |   |         |          |          |   |         |          |          |   |         |          |          |   |          |          |          |   |          |          |          |   |          |          |          |   |          |          |          |   |          |         |         |   |          |         |         |   |          |         |         |   |          |         |         |   |          |         |         |   |          |          |         |   |          |          |          |   |          |          |         |   |          |          |         |   |          |          |         |                                                                                                                                                                                                                      |                                                                                                                                                                                                                                                                                                                                                                                                                                                                                                                                                                                                                                                                                                                                                                                                                                                                                                                                                                                                                                                                                                                                                                                                                                                                                                                                                                                                                                                                                                                                                                                                                                                                                                                                                                                                                                                                                                                                                                                                                                                                                                                                                                                                                                                                                                                                                                                                                                                                                                                                                                                                                                                                                                                                                                                                                                                                                                                                         |         |          |         |          |         |          |         |          |         |          |                                                                                                                                                                                                                        |                                                                                                                                                                                                                                                                                                                                                                                                                                                                                                                                                                                                                                                                                                                                                                                                                                                                                                                                                                                                                                                                                                                                                                                                                                                                                                                                                                                                                                                                                                                                                                                                                                                                                                                                                                                                                                                                                                                                                                                                                                                                                                                                                                                                                                                                                                                                                                                                                                                                                                                                                                                                                                                                                                                                                                                                                                                                                                                                                                                                                                                                                                                                                           |   |         |         |          |   |          |         |          |   |          |         |          |   |         |         |          |   |          |         |          |   |          |         |          |   |         |          |          |   |         |         |          |   |         |         |         |   |          |         |          |   |         |          |         |   |         |          |         |   |         |         |         |   |          |          |         |   |          |          |         |   |         |         |         |   |         |         |         |   |          |          |          |   |         |          |          |   |         |          |          |   |          |          |          |   |          |          |          |   |          |          |          |   |          |          |          |   |          |          |          |   |          |          |          |   |          |          |          |   |          |          |          |   |          |          |          |   |          |          |          |   |          |          |         |   |          |          |          |   |          |          |         |   |          |          |         |   |          |          |         |   |          |          |         |   |          |          |         |   |          |          |          |   |          |          |         |   |          |         |         |   |          |         |         |   |          |         |          |   |          |         |         |
| C                                                                                                                                                                                                                      | 0.07990                                                                                                                                                                                                                                                                                                                                                                                                                                                                                                                                                                                                                                                                                                                                                                                                                                                                                                                                                                                                                                                                                                                                                                                                                                                                                                                                                                                                                                                                                                                                                                                                                                                                                                                                                                                                                                                                                                                                                                                                                                                                                                                                                                                                                                                                                                                                                                                                                                                                                                                                                                                                                                                                                                                                                                                                                                                                                                                                                                                                                                                                                                                                            | -0.66429 | 3.33169  |         |          |   |         |         |          |   |         |         |         |   |         |          |          |   |         |         |          |   |         |         |          |   |         |          |          |   |         |         |          |   |         |         |         |   |         |          |          |   |         |         |         |   |         |         |         |   |         |         |         |   |          |         |         |   |          |         |         |   |         |         |         |   |         |         |         |   |          |          |         |   |         |          |         |   |         |         |         |   |         |          |          |   |         |          |          |   |         |          |          |   |         |          |          |   |         |          |          |   |         |          |          |   |          |          |          |   |          |          |          |   |          |          |          |   |          |          |          |   |          |         |         |   |          |         |         |   |          |         |         |   |          |         |         |   |          |         |         |   |          |          |         |   |          |          |          |   |          |          |         |   |          |          |         |   |          |          |         |                                                                                                                                                                                                                      |                                                                                                                                                                                                                                                                                                                                                                                                                                                                                                                                                                                                                                                                                                                                                                                                                                                                                                                                                                                                                                                                                                                                                                                                                                                                                                                                                                                                                                                                                                                                                                                                                                                                                                                                                                                                                                                                                                                                                                                                                                                                                                                                                                                                                                                                                                                                                                                                                                                                                                                                                                                                                                                                                                                                                                                                                                                                                                                                         |         |          |         |          |         |          |         |          |         |          |                                                                                                                                                                                                                        |                                                                                                                                                                                                                                                                                                                                                                                                                                                                                                                                                                                                                                                                                                                                                                                                                                                                                                                                                                                                                                                                                                                                                                                                                                                                                                                                                                                                                                                                                                                                                                                                                                                                                                                                                                                                                                                                                                                                                                                                                                                                                                                                                                                                                                                                                                                                                                                                                                                                                                                                                                                                                                                                                                                                                                                                                                                                                                                                                                                                                                                                                                                                                           |   |         |         |          |   |          |         |          |   |          |         |          |   |         |         |          |   |          |         |          |   |          |         |          |   |         |          |          |   |         |         |          |   |         |         |         |   |          |         |          |   |         |          |         |   |         |          |         |   |         |         |         |   |          |          |         |   |          |          |         |   |         |         |         |   |         |         |         |   |          |          |          |   |         |          |          |   |         |          |          |   |          |          |          |   |          |          |          |   |          |          |          |   |          |          |          |   |          |          |          |   |          |          |          |   |          |          |          |   |          |          |          |   |          |          |          |   |          |          |          |   |          |          |         |   |          |          |          |   |          |          |         |   |          |          |         |   |          |          |         |   |          |          |         |   |          |          |         |   |          |          |          |   |          |          |         |   |          |         |         |   |          |         |         |   |          |         |          |   |          |         |         |
| C                                                                                                                                                                                                                      | 0.02257                                                                                                                                                                                                                                                                                                                                                                                                                                                                                                                                                                                                                                                                                                                                                                                                                                                                                                                                                                                                                                                                                                                                                                                                                                                                                                                                                                                                                                                                                                                                                                                                                                                                                                                                                                                                                                                                                                                                                                                                                                                                                                                                                                                                                                                                                                                                                                                                                                                                                                                                                                                                                                                                                                                                                                                                                                                                                                                                                                                                                                                                                                                                            | 1.69547  | 3.62126  |         |          |   |         |         |          |   |         |         |         |   |         |          |          |   |         |         |          |   |         |         |          |   |         |          |          |   |         |         |          |   |         |         |         |   |         |          |          |   |         |         |         |   |         |         |         |   |         |         |         |   |          |         |         |   |          |         |         |   |         |         |         |   |         |         |         |   |          |          |         |   |         |          |         |   |         |         |         |   |         |          |          |   |         |          |          |   |         |          |          |   |         |          |          |   |         |          |          |   |         |          |          |   |          |          |          |   |          |          |          |   |          |          |          |   |          |          |          |   |          |         |         |   |          |         |         |   |          |         |         |   |          |         |         |   |          |         |         |   |          |          |         |   |          |          |          |   |          |          |         |   |          |          |         |   |          |          |         |                                                                                                                                                                                                                      |                                                                                                                                                                                                                                                                                                                                                                                                                                                                                                                                                                                                                                                                                                                                                                                                                                                                                                                                                                                                                                                                                                                                                                                                                                                                                                                                                                                                                                                                                                                                                                                                                                                                                                                                                                                                                                                                                                                                                                                                                                                                                                                                                                                                                                                                                                                                                                                                                                                                                                                                                                                                                                                                                                                                                                                                                                                                                                                                         |         |          |         |          |         |          |         |          |         |          |                                                                                                                                                                                                                        |                                                                                                                                                                                                                                                                                                                                                                                                                                                                                                                                                                                                                                                                                                                                                                                                                                                                                                                                                                                                                                                                                                                                                                                                                                                                                                                                                                                                                                                                                                                                                                                                                                                                                                                                                                                                                                                                                                                                                                                                                                                                                                                                                                                                                                                                                                                                                                                                                                                                                                                                                                                                                                                                                                                                                                                                                                                                                                                                                                                                                                                                                                                                                           |   |         |         |          |   |          |         |          |   |          |         |          |   |         |         |          |   |          |         |          |   |          |         |          |   |         |          |          |   |         |         |          |   |         |         |         |   |          |         |          |   |         |          |         |   |         |          |         |   |         |         |         |   |          |          |         |   |          |          |         |   |         |         |         |   |         |         |         |   |          |          |          |   |         |          |          |   |         |          |          |   |          |          |          |   |          |          |          |   |          |          |          |   |          |          |          |   |          |          |          |   |          |          |          |   |          |          |          |   |          |          |          |   |          |          |          |   |          |          |          |   |          |          |         |   |          |          |          |   |          |          |         |   |          |          |         |   |          |          |         |   |          |          |         |   |          |          |         |   |          |          |          |   |          |          |         |   |          |         |         |   |          |         |         |   |          |         |          |   |          |         |         |
| H                                                                                                                                                                                                                      | 0.02818                                                                                                                                                                                                                                                                                                                                                                                                                                                                                                                                                                                                                                                                                                                                                                                                                                                                                                                                                                                                                                                                                                                                                                                                                                                                                                                                                                                                                                                                                                                                                                                                                                                                                                                                                                                                                                                                                                                                                                                                                                                                                                                                                                                                                                                                                                                                                                                                                                                                                                                                                                                                                                                                                                                                                                                                                                                                                                                                                                                                                                                                                                                                            | 2.83552  | 1.86884  |         |          |   |         |         |          |   |         |         |         |   |         |          |          |   |         |         |          |   |         |         |          |   |         |          |          |   |         |         |          |   |         |         |         |   |         |          |          |   |         |         |         |   |         |         |         |   |         |         |         |   |          |         |         |   |          |         |         |   |         |         |         |   |         |         |         |   |          |          |         |   |         |          |         |   |         |         |         |   |         |          |          |   |         |          |          |   |         |          |          |   |         |          |          |   |         |          |          |   |         |          |          |   |          |          |          |   |          |          |          |   |          |          |          |   |          |          |          |   |          |         |         |   |          |         |         |   |          |         |         |   |          |         |         |   |          |         |         |   |          |          |         |   |          |          |          |   |          |          |         |   |          |          |         |   |          |          |         |                                                                                                                                                                                                                      |                                                                                                                                                                                                                                                                                                                                                                                                                                                                                                                                                                                                                                                                                                                                                                                                                                                                                                                                                                                                                                                                                                                                                                                                                                                                                                                                                                                                                                                                                                                                                                                                                                                                                                                                                                                                                                                                                                                                                                                                                                                                                                                                                                                                                                                                                                                                                                                                                                                                                                                                                                                                                                                                                                                                                                                                                                                                                                                                         |         |          |         |          |         |          |         |          |         |          |                                                                                                                                                                                                                        |                                                                                                                                                                                                                                                                                                                                                                                                                                                                                                                                                                                                                                                                                                                                                                                                                                                                                                                                                                                                                                                                                                                                                                                                                                                                                                                                                                                                                                                                                                                                                                                                                                                                                                                                                                                                                                                                                                                                                                                                                                                                                                                                                                                                                                                                                                                                                                                                                                                                                                                                                                                                                                                                                                                                                                                                                                                                                                                                                                                                                                                                                                                                                           |   |         |         |          |   |          |         |          |   |          |         |          |   |         |         |          |   |          |         |          |   |          |         |          |   |         |          |          |   |         |         |          |   |         |         |         |   |          |         |          |   |         |          |         |   |         |          |         |   |         |         |         |   |          |          |         |   |          |          |         |   |         |         |         |   |         |         |         |   |          |          |          |   |         |          |          |   |         |          |          |   |          |          |          |   |          |          |          |   |          |          |          |   |          |          |          |   |          |          |          |   |          |          |          |   |          |          |          |   |          |          |          |   |          |          |          |   |          |          |          |   |          |          |         |   |          |          |          |   |          |          |         |   |          |          |         |   |          |          |         |   |          |          |         |   |          |          |         |   |          |          |          |   |          |          |         |   |          |         |         |   |          |         |         |   |          |         |          |   |          |         |         |
| H                                                                                                                                                                                                                      | 0.10663                                                                                                                                                                                                                                                                                                                                                                                                                                                                                                                                                                                                                                                                                                                                                                                                                                                                                                                                                                                                                                                                                                                                                                                                                                                                                                                                                                                                                                                                                                                                                                                                                                                                                                                                                                                                                                                                                                                                                                                                                                                                                                                                                                                                                                                                                                                                                                                                                                                                                                                                                                                                                                                                                                                                                                                                                                                                                                                                                                                                                                                                                                                                            | -1.64528 | 3.77972  |         |          |   |         |         |          |   |         |         |         |   |         |          |          |   |         |         |          |   |         |         |          |   |         |          |          |   |         |         |          |   |         |         |         |   |         |          |          |   |         |         |         |   |         |         |         |   |         |         |         |   |          |         |         |   |          |         |         |   |         |         |         |   |         |         |         |   |          |          |         |   |         |          |         |   |         |         |         |   |         |          |          |   |         |          |          |   |         |          |          |   |         |          |          |   |         |          |          |   |         |          |          |   |          |          |          |   |          |          |          |   |          |          |          |   |          |          |          |   |          |         |         |   |          |         |         |   |          |         |         |   |          |         |         |   |          |         |         |   |          |          |         |   |          |          |          |   |          |          |         |   |          |          |         |   |          |          |         |                                                                                                                                                                                                                      |                                                                                                                                                                                                                                                                                                                                                                                                                                                                                                                                                                                                                                                                                                                                                                                                                                                                                                                                                                                                                                                                                                                                                                                                                                                                                                                                                                                                                                                                                                                                                                                                                                                                                                                                                                                                                                                                                                                                                                                                                                                                                                                                                                                                                                                                                                                                                                                                                                                                                                                                                                                                                                                                                                                                                                                                                                                                                                                                         |         |          |         |          |         |          |         |          |         |          |                                                                                                                                                                                                                        |                                                                                                                                                                                                                                                                                                                                                                                                                                                                                                                                                                                                                                                                                                                                                                                                                                                                                                                                                                                                                                                                                                                                                                                                                                                                                                                                                                                                                                                                                                                                                                                                                                                                                                                                                                                                                                                                                                                                                                                                                                                                                                                                                                                                                                                                                                                                                                                                                                                                                                                                                                                                                                                                                                                                                                                                                                                                                                                                                                                                                                                                                                                                                           |   |         |         |          |   |          |         |          |   |          |         |          |   |         |         |          |   |          |         |          |   |          |         |          |   |         |          |          |   |         |         |          |   |         |         |         |   |          |         |          |   |         |          |         |   |         |          |         |   |         |         |         |   |          |          |         |   |          |          |         |   |         |         |         |   |         |         |         |   |          |          |          |   |         |          |          |   |         |          |          |   |          |          |          |   |          |          |          |   |          |          |          |   |          |          |          |   |          |          |          |   |          |          |          |   |          |          |          |   |          |          |          |   |          |          |          |   |          |          |          |   |          |          |         |   |          |          |          |   |          |          |         |   |          |          |         |   |          |          |         |   |          |          |         |   |          |          |         |   |          |          |          |   |          |          |         |   |          |         |         |   |          |         |         |   |          |         |          |   |          |         |         |
| H                                                                                                                                                                                                                      | 0.00535                                                                                                                                                                                                                                                                                                                                                                                                                                                                                                                                                                                                                                                                                                                                                                                                                                                                                                                                                                                                                                                                                                                                                                                                                                                                                                                                                                                                                                                                                                                                                                                                                                                                                                                                                                                                                                                                                                                                                                                                                                                                                                                                                                                                                                                                                                                                                                                                                                                                                                                                                                                                                                                                                                                                                                                                                                                                                                                                                                                                                                                                                                                                            | 2.58137  | 4.24265  |         |          |   |         |         |          |   |         |         |         |   |         |          |          |   |         |         |          |   |         |         |          |   |         |          |          |   |         |         |          |   |         |         |         |   |         |          |          |   |         |         |         |   |         |         |         |   |         |         |         |   |          |         |         |   |          |         |         |   |         |         |         |   |         |         |         |   |          |          |         |   |         |          |         |   |         |         |         |   |         |          |          |   |         |          |          |   |         |          |          |   |         |          |          |   |         |          |          |   |         |          |          |   |          |          |          |   |          |          |          |   |          |          |          |   |          |          |          |   |          |         |         |   |          |         |         |   |          |         |         |   |          |         |         |   |          |         |         |   |          |          |         |   |          |          |          |   |          |          |         |   |          |          |         |   |          |          |         |                                                                                                                                                                                                                      |                                                                                                                                                                                                                                                                                                                                                                                                                                                                                                                                                                                                                                                                                                                                                                                                                                                                                                                                                                                                                                                                                                                                                                                                                                                                                                                                                                                                                                                                                                                                                                                                                                                                                                                                                                                                                                                                                                                                                                                                                                                                                                                                                                                                                                                                                                                                                                                                                                                                                                                                                                                                                                                                                                                                                                                                                                                                                                                                         |         |          |         |          |         |          |         |          |         |          |                                                                                                                                                                                                                        |                                                                                                                                                                                                                                                                                                                                                                                                                                                                                                                                                                                                                                                                                                                                                                                                                                                                                                                                                                                                                                                                                                                                                                                                                                                                                                                                                                                                                                                                                                                                                                                                                                                                                                                                                                                                                                                                                                                                                                                                                                                                                                                                                                                                                                                                                                                                                                                                                                                                                                                                                                                                                                                                                                                                                                                                                                                                                                                                                                                                                                                                                                                                                           |   |         |         |          |   |          |         |          |   |          |         |          |   |         |         |          |   |          |         |          |   |          |         |          |   |         |          |          |   |         |         |          |   |         |         |         |   |          |         |          |   |         |          |         |   |         |          |         |   |         |         |         |   |          |          |         |   |          |          |         |   |         |         |         |   |         |         |         |   |          |          |          |   |         |          |          |   |         |          |          |   |          |          |          |   |          |          |          |   |          |          |          |   |          |          |          |   |          |          |          |   |          |          |          |   |          |          |          |   |          |          |          |   |          |          |          |   |          |          |          |   |          |          |         |   |          |          |          |   |          |          |         |   |          |          |         |   |          |          |         |   |          |          |         |   |          |          |         |   |          |          |          |   |          |          |         |   |          |         |         |   |          |         |         |   |          |         |          |   |          |         |         |
| H                                                                                                                                                                                                                      | 0.02585                                                                                                                                                                                                                                                                                                                                                                                                                                                                                                                                                                                                                                                                                                                                                                                                                                                                                                                                                                                                                                                                                                                                                                                                                                                                                                                                                                                                                                                                                                                                                                                                                                                                                                                                                                                                                                                                                                                                                                                                                                                                                                                                                                                                                                                                                                                                                                                                                                                                                                                                                                                                                                                                                                                                                                                                                                                                                                                                                                                                                                                                                                                                            | 0.28763  | 5.25341  |         |          |   |         |         |          |   |         |         |         |   |         |          |          |   |         |         |          |   |         |         |          |   |         |          |          |   |         |         |          |   |         |         |         |   |         |          |          |   |         |         |         |   |         |         |         |   |         |         |         |   |          |         |         |   |          |         |         |   |         |         |         |   |         |         |         |   |          |          |         |   |         |          |         |   |         |         |         |   |         |          |          |   |         |          |          |   |         |          |          |   |         |          |          |   |         |          |          |   |         |          |          |   |          |          |          |   |          |          |          |   |          |          |          |   |          |          |          |   |          |         |         |   |          |         |         |   |          |         |         |   |          |         |         |   |          |         |         |   |          |          |         |   |          |          |          |   |          |          |         |   |          |          |         |   |          |          |         |                                                                                                                                                                                                                      |                                                                                                                                                                                                                                                                                                                                                                                                                                                                                                                                                                                                                                                                                                                                                                                                                                                                                                                                                                                                                                                                                                                                                                                                                                                                                                                                                                                                                                                                                                                                                                                                                                                                                                                                                                                                                                                                                                                                                                                                                                                                                                                                                                                                                                                                                                                                                                                                                                                                                                                                                                                                                                                                                                                                                                                                                                                                                                                                         |         |          |         |          |         |          |         |          |         |          |                                                                                                                                                                                                                        |                                                                                                                                                                                                                                                                                                                                                                                                                                                                                                                                                                                                                                                                                                                                                                                                                                                                                                                                                                                                                                                                                                                                                                                                                                                                                                                                                                                                                                                                                                                                                                                                                                                                                                                                                                                                                                                                                                                                                                                                                                                                                                                                                                                                                                                                                                                                                                                                                                                                                                                                                                                                                                                                                                                                                                                                                                                                                                                                                                                                                                                                                                                                                           |   |         |         |          |   |          |         |          |   |          |         |          |   |         |         |          |   |          |         |          |   |          |         |          |   |         |          |          |   |         |         |          |   |         |         |         |   |          |         |          |   |         |          |         |   |         |          |         |   |         |         |         |   |          |          |         |   |          |          |         |   |         |         |         |   |         |         |         |   |          |          |          |   |         |          |          |   |         |          |          |   |          |          |          |   |          |          |          |   |          |          |          |   |          |          |          |   |          |          |          |   |          |          |          |   |          |          |          |   |          |          |          |   |          |          |          |   |          |          |          |   |          |          |         |   |          |          |          |   |          |          |         |   |          |          |         |   |          |          |         |   |          |          |         |   |          |          |         |   |          |          |          |   |          |          |         |   |          |         |         |   |          |         |         |   |          |         |          |   |          |         |         |
| C                                                                                                                                                                                                                      | 0.08903                                                                                                                                                                                                                                                                                                                                                                                                                                                                                                                                                                                                                                                                                                                                                                                                                                                                                                                                                                                                                                                                                                                                                                                                                                                                                                                                                                                                                                                                                                                                                                                                                                                                                                                                                                                                                                                                                                                                                                                                                                                                                                                                                                                                                                                                                                                                                                                                                                                                                                                                                                                                                                                                                                                                                                                                                                                                                                                                                                                                                                                                                                                                            | -0.62144 | -3.56721 |         |          |   |         |         |          |   |         |         |         |   |         |          |          |   |         |         |          |   |         |         |          |   |         |          |          |   |         |         |          |   |         |         |         |   |         |          |          |   |         |         |         |   |         |         |         |   |         |         |         |   |          |         |         |   |          |         |         |   |         |         |         |   |         |         |         |   |          |          |         |   |         |          |         |   |         |         |         |   |         |          |          |   |         |          |          |   |         |          |          |   |         |          |          |   |         |          |          |   |         |          |          |   |          |          |          |   |          |          |          |   |          |          |          |   |          |          |          |   |          |         |         |   |          |         |         |   |          |         |         |   |          |         |         |   |          |         |         |   |          |          |         |   |          |          |          |   |          |          |         |   |          |          |         |   |          |          |         |                                                                                                                                                                                                                      |                                                                                                                                                                                                                                                                                                                                                                                                                                                                                                                                                                                                                                                                                                                                                                                                                                                                                                                                                                                                                                                                                                                                                                                                                                                                                                                                                                                                                                                                                                                                                                                                                                                                                                                                                                                                                                                                                                                                                                                                                                                                                                                                                                                                                                                                                                                                                                                                                                                                                                                                                                                                                                                                                                                                                                                                                                                                                                                                         |         |          |         |          |         |          |         |          |         |          |                                                                                                                                                                                                                        |                                                                                                                                                                                                                                                                                                                                                                                                                                                                                                                                                                                                                                                                                                                                                                                                                                                                                                                                                                                                                                                                                                                                                                                                                                                                                                                                                                                                                                                                                                                                                                                                                                                                                                                                                                                                                                                                                                                                                                                                                                                                                                                                                                                                                                                                                                                                                                                                                                                                                                                                                                                                                                                                                                                                                                                                                                                                                                                                                                                                                                                                                                                                                           |   |         |         |          |   |          |         |          |   |          |         |          |   |         |         |          |   |          |         |          |   |          |         |          |   |         |          |          |   |         |         |          |   |         |         |         |   |          |         |          |   |         |          |         |   |         |          |         |   |         |         |         |   |          |          |         |   |          |          |         |   |         |         |         |   |         |         |         |   |          |          |          |   |         |          |          |   |         |          |          |   |          |          |          |   |          |          |          |   |          |          |          |   |          |          |          |   |          |          |          |   |          |          |          |   |          |          |          |   |          |          |          |   |          |          |          |   |          |          |          |   |          |          |         |   |          |          |          |   |          |          |         |   |          |          |         |   |          |          |         |   |          |          |         |   |          |          |         |   |          |          |          |   |          |          |         |   |          |         |         |   |          |         |         |   |          |         |          |   |          |         |         |
| H                                                                                                                                                                                                                      | 0.06954                                                                                                                                                                                                                                                                                                                                                                                                                                                                                                                                                                                                                                                                                                                                                                                                                                                                                                                                                                                                                                                                                                                                                                                                                                                                                                                                                                                                                                                                                                                                                                                                                                                                                                                                                                                                                                                                                                                                                                                                                                                                                                                                                                                                                                                                                                                                                                                                                                                                                                                                                                                                                                                                                                                                                                                                                                                                                                                                                                                                                                                                                                                                            | -0.14054 | -4.54921 |         |          |   |         |         |          |   |         |         |         |   |         |          |          |   |         |         |          |   |         |         |          |   |         |          |          |   |         |         |          |   |         |         |         |   |         |          |          |   |         |         |         |   |         |         |         |   |         |         |         |   |          |         |         |   |          |         |         |   |         |         |         |   |         |         |         |   |          |          |         |   |         |          |         |   |         |         |         |   |         |          |          |   |         |          |          |   |         |          |          |   |         |          |          |   |         |          |          |   |         |          |          |   |          |          |          |   |          |          |          |   |          |          |          |   |          |          |          |   |          |         |         |   |          |         |         |   |          |         |         |   |          |         |         |   |          |         |         |   |          |          |         |   |          |          |          |   |          |          |         |   |          |          |         |   |          |          |         |                                                                                                                                                                                                                      |                                                                                                                                                                                                                                                                                                                                                                                                                                                                                                                                                                                                                                                                                                                                                                                                                                                                                                                                                                                                                                                                                                                                                                                                                                                                                                                                                                                                                                                                                                                                                                                                                                                                                                                                                                                                                                                                                                                                                                                                                                                                                                                                                                                                                                                                                                                                                                                                                                                                                                                                                                                                                                                                                                                                                                                                                                                                                                                                         |         |          |         |          |         |          |         |          |         |          |                                                                                                                                                                                                                        |                                                                                                                                                                                                                                                                                                                                                                                                                                                                                                                                                                                                                                                                                                                                                                                                                                                                                                                                                                                                                                                                                                                                                                                                                                                                                                                                                                                                                                                                                                                                                                                                                                                                                                                                                                                                                                                                                                                                                                                                                                                                                                                                                                                                                                                                                                                                                                                                                                                                                                                                                                                                                                                                                                                                                                                                                                                                                                                                                                                                                                                                                                                                                           |   |         |         |          |   |          |         |          |   |          |         |          |   |         |         |          |   |          |         |          |   |          |         |          |   |         |          |          |   |         |         |          |   |         |         |         |   |          |         |          |   |         |          |         |   |         |          |         |   |         |         |         |   |          |          |         |   |          |          |         |   |         |         |         |   |         |         |         |   |          |          |          |   |         |          |          |   |         |          |          |   |          |          |          |   |          |          |          |   |          |          |          |   |          |          |          |   |          |          |          |   |          |          |          |   |          |          |          |   |          |          |          |   |          |          |          |   |          |          |          |   |          |          |         |   |          |          |          |   |          |          |         |   |          |          |         |   |          |          |         |   |          |          |         |   |          |          |         |   |          |          |          |   |          |          |         |   |          |         |         |   |          |         |         |   |          |         |          |   |          |         |         |
| C                                                                                                                                                                                                                      | 1.37981                                                                                                                                                                                                                                                                                                                                                                                                                                                                                                                                                                                                                                                                                                                                                                                                                                                                                                                                                                                                                                                                                                                                                                                                                                                                                                                                                                                                                                                                                                                                                                                                                                                                                                                                                                                                                                                                                                                                                                                                                                                                                                                                                                                                                                                                                                                                                                                                                                                                                                                                                                                                                                                                                                                                                                                                                                                                                                                                                                                                                                                                                                                                            | -1.44487 | -3.46697 |         |          |   |         |         |          |   |         |         |         |   |         |          |          |   |         |         |          |   |         |         |          |   |         |          |          |   |         |         |          |   |         |         |         |   |         |          |          |   |         |         |         |   |         |         |         |   |         |         |         |   |          |         |         |   |          |         |         |   |         |         |         |   |         |         |         |   |          |          |         |   |         |          |         |   |         |         |         |   |         |          |          |   |         |          |          |   |         |          |          |   |         |          |          |   |         |          |          |   |         |          |          |   |          |          |          |   |          |          |          |   |          |          |          |   |          |          |          |   |          |         |         |   |          |         |         |   |          |         |         |   |          |         |         |   |          |         |         |   |          |          |         |   |          |          |          |   |          |          |         |   |          |          |         |   |          |          |         |                                                                                                                                                                                                                      |                                                                                                                                                                                                                                                                                                                                                                                                                                                                                                                                                                                                                                                                                                                                                                                                                                                                                                                                                                                                                                                                                                                                                                                                                                                                                                                                                                                                                                                                                                                                                                                                                                                                                                                                                                                                                                                                                                                                                                                                                                                                                                                                                                                                                                                                                                                                                                                                                                                                                                                                                                                                                                                                                                                                                                                                                                                                                                                                         |         |          |         |          |         |          |         |          |         |          |                                                                                                                                                                                                                        |                                                                                                                                                                                                                                                                                                                                                                                                                                                                                                                                                                                                                                                                                                                                                                                                                                                                                                                                                                                                                                                                                                                                                                                                                                                                                                                                                                                                                                                                                                                                                                                                                                                                                                                                                                                                                                                                                                                                                                                                                                                                                                                                                                                                                                                                                                                                                                                                                                                                                                                                                                                                                                                                                                                                                                                                                                                                                                                                                                                                                                                                                                                                                           |   |         |         |          |   |          |         |          |   |          |         |          |   |         |         |          |   |          |         |          |   |          |         |          |   |         |          |          |   |         |         |          |   |         |         |         |   |          |         |          |   |         |          |         |   |         |          |         |   |         |         |         |   |          |          |         |   |          |          |         |   |         |         |         |   |         |         |         |   |          |          |          |   |         |          |          |   |         |          |          |   |          |          |          |   |          |          |          |   |          |          |          |   |          |          |          |   |          |          |          |   |          |          |          |   |          |          |          |   |          |          |          |   |          |          |          |   |          |          |          |   |          |          |         |   |          |          |          |   |          |          |         |   |          |          |         |   |          |          |         |   |          |          |         |   |          |          |         |   |          |          |          |   |          |          |         |   |          |         |         |   |          |         |         |   |          |         |          |   |          |         |         |
| H                                                                                                                                                                                                                      | 1.43319                                                                                                                                                                                                                                                                                                                                                                                                                                                                                                                                                                                                                                                                                                                                                                                                                                                                                                                                                                                                                                                                                                                                                                                                                                                                                                                                                                                                                                                                                                                                                                                                                                                                                                                                                                                                                                                                                                                                                                                                                                                                                                                                                                                                                                                                                                                                                                                                                                                                                                                                                                                                                                                                                                                                                                                                                                                                                                                                                                                                                                                                                                                                            | -1.95356 | -2.50123 |         |          |   |         |         |          |   |         |         |         |   |         |          |          |   |         |         |          |   |         |         |          |   |         |          |          |   |         |         |          |   |         |         |         |   |         |          |          |   |         |         |         |   |         |         |         |   |         |         |         |   |          |         |         |   |          |         |         |   |         |         |         |   |         |         |         |   |          |          |         |   |         |          |         |   |         |         |         |   |         |          |          |   |         |          |          |   |         |          |          |   |         |          |          |   |         |          |          |   |         |          |          |   |          |          |          |   |          |          |          |   |          |          |          |   |          |          |          |   |          |         |         |   |          |         |         |   |          |         |         |   |          |         |         |   |          |         |         |   |          |          |         |   |          |          |          |   |          |          |         |   |          |          |         |   |          |          |         |                                                                                                                                                                                                                      |                                                                                                                                                                                                                                                                                                                                                                                                                                                                                                                                                                                                                                                                                                                                                                                                                                                                                                                                                                                                                                                                                                                                                                                                                                                                                                                                                                                                                                                                                                                                                                                                                                                                                                                                                                                                                                                                                                                                                                                                                                                                                                                                                                                                                                                                                                                                                                                                                                                                                                                                                                                                                                                                                                                                                                                                                                                                                                                                         |         |          |         |          |         |          |         |          |         |          |                                                                                                                                                                                                                        |                                                                                                                                                                                                                                                                                                                                                                                                                                                                                                                                                                                                                                                                                                                                                                                                                                                                                                                                                                                                                                                                                                                                                                                                                                                                                                                                                                                                                                                                                                                                                                                                                                                                                                                                                                                                                                                                                                                                                                                                                                                                                                                                                                                                                                                                                                                                                                                                                                                                                                                                                                                                                                                                                                                                                                                                                                                                                                                                                                                                                                                                                                                                                           |   |         |         |          |   |          |         |          |   |          |         |          |   |         |         |          |   |          |         |          |   |          |         |          |   |         |          |          |   |         |         |          |   |         |         |         |   |          |         |          |   |         |          |         |   |         |          |         |   |         |         |         |   |          |          |         |   |          |          |         |   |         |         |         |   |         |         |         |   |          |          |          |   |         |          |          |   |         |          |          |   |          |          |          |   |          |          |          |   |          |          |          |   |          |          |          |   |          |          |          |   |          |          |          |   |          |          |          |   |          |          |          |   |          |          |          |   |          |          |          |   |          |          |         |   |          |          |          |   |          |          |         |   |          |          |         |   |          |          |         |   |          |          |         |   |          |          |         |   |          |          |          |   |          |          |         |   |          |         |         |   |          |         |         |   |          |         |          |   |          |         |         |
| H                                                                                                                                                                                                                      | 2.26170                                                                                                                                                                                                                                                                                                                                                                                                                                                                                                                                                                                                                                                                                                                                                                                                                                                                                                                                                                                                                                                                                                                                                                                                                                                                                                                                                                                                                                                                                                                                                                                                                                                                                                                                                                                                                                                                                                                                                                                                                                                                                                                                                                                                                                                                                                                                                                                                                                                                                                                                                                                                                                                                                                                                                                                                                                                                                                                                                                                                                                                                                                                                            | -0.80874 | -3.56246 |         |          |   |         |         |          |   |         |         |         |   |         |          |          |   |         |         |          |   |         |         |          |   |         |          |          |   |         |         |          |   |         |         |         |   |         |          |          |   |         |         |         |   |         |         |         |   |         |         |         |   |          |         |         |   |          |         |         |   |         |         |         |   |         |         |         |   |          |          |         |   |         |          |         |   |         |         |         |   |         |          |          |   |         |          |          |   |         |          |          |   |         |          |          |   |         |          |          |   |         |          |          |   |          |          |          |   |          |          |          |   |          |          |          |   |          |          |          |   |          |         |         |   |          |         |         |   |          |         |         |   |          |         |         |   |          |         |         |   |          |          |         |   |          |          |          |   |          |          |         |   |          |          |         |   |          |          |         |                                                                                                                                                                                                                      |                                                                                                                                                                                                                                                                                                                                                                                                                                                                                                                                                                                                                                                                                                                                                                                                                                                                                                                                                                                                                                                                                                                                                                                                                                                                                                                                                                                                                                                                                                                                                                                                                                                                                                                                                                                                                                                                                                                                                                                                                                                                                                                                                                                                                                                                                                                                                                                                                                                                                                                                                                                                                                                                                                                                                                                                                                                                                                                                         |         |          |         |          |         |          |         |          |         |          |                                                                                                                                                                                                                        |                                                                                                                                                                                                                                                                                                                                                                                                                                                                                                                                                                                                                                                                                                                                                                                                                                                                                                                                                                                                                                                                                                                                                                                                                                                                                                                                                                                                                                                                                                                                                                                                                                                                                                                                                                                                                                                                                                                                                                                                                                                                                                                                                                                                                                                                                                                                                                                                                                                                                                                                                                                                                                                                                                                                                                                                                                                                                                                                                                                                                                                                                                                                                           |   |         |         |          |   |          |         |          |   |          |         |          |   |         |         |          |   |          |         |          |   |          |         |          |   |         |          |          |   |         |         |          |   |         |         |         |   |          |         |          |   |         |          |         |   |         |          |         |   |         |         |         |   |          |          |         |   |          |          |         |   |         |         |         |   |         |         |         |   |          |          |          |   |         |          |          |   |         |          |          |   |          |          |          |   |          |          |          |   |          |          |          |   |          |          |          |   |          |          |          |   |          |          |          |   |          |          |          |   |          |          |          |   |          |          |          |   |          |          |          |   |          |          |         |   |          |          |          |   |          |          |         |   |          |          |         |   |          |          |         |   |          |          |         |   |          |          |         |   |          |          |          |   |          |          |         |   |          |         |         |   |          |         |         |   |          |         |          |   |          |         |         |
| H                                                                                                                                                                                                                      | 1.40971                                                                                                                                                                                                                                                                                                                                                                                                                                                                                                                                                                                                                                                                                                                                                                                                                                                                                                                                                                                                                                                                                                                                                                                                                                                                                                                                                                                                                                                                                                                                                                                                                                                                                                                                                                                                                                                                                                                                                                                                                                                                                                                                                                                                                                                                                                                                                                                                                                                                                                                                                                                                                                                                                                                                                                                                                                                                                                                                                                                                                                                                                                                                            | -2.20528 | -4.25097 |         |          |   |         |         |          |   |         |         |         |   |         |          |          |   |         |         |          |   |         |         |          |   |         |          |          |   |         |         |          |   |         |         |         |   |         |          |          |   |         |         |         |   |         |         |         |   |         |         |         |   |          |         |         |   |          |         |         |   |         |         |         |   |         |         |         |   |          |          |         |   |         |          |         |   |         |         |         |   |         |          |          |   |         |          |          |   |         |          |          |   |         |          |          |   |         |          |          |   |         |          |          |   |          |          |          |   |          |          |          |   |          |          |          |   |          |          |          |   |          |         |         |   |          |         |         |   |          |         |         |   |          |         |         |   |          |         |         |   |          |          |         |   |          |          |          |   |          |          |         |   |          |          |         |   |          |          |         |                                                                                                                                                                                                                      |                                                                                                                                                                                                                                                                                                                                                                                                                                                                                                                                                                                                                                                                                                                                                                                                                                                                                                                                                                                                                                                                                                                                                                                                                                                                                                                                                                                                                                                                                                                                                                                                                                                                                                                                                                                                                                                                                                                                                                                                                                                                                                                                                                                                                                                                                                                                                                                                                                                                                                                                                                                                                                                                                                                                                                                                                                                                                                                                         |         |          |         |          |         |          |         |          |         |          |                                                                                                                                                                                                                        |                                                                                                                                                                                                                                                                                                                                                                                                                                                                                                                                                                                                                                                                                                                                                                                                                                                                                                                                                                                                                                                                                                                                                                                                                                                                                                                                                                                                                                                                                                                                                                                                                                                                                                                                                                                                                                                                                                                                                                                                                                                                                                                                                                                                                                                                                                                                                                                                                                                                                                                                                                                                                                                                                                                                                                                                                                                                                                                                                                                                                                                                                                                                                           |   |         |         |          |   |          |         |          |   |          |         |          |   |         |         |          |   |          |         |          |   |          |         |          |   |         |          |          |   |         |         |          |   |         |         |         |   |          |         |          |   |         |          |         |   |         |          |         |   |         |         |         |   |          |          |         |   |          |          |         |   |         |         |         |   |         |         |         |   |          |          |          |   |         |          |          |   |         |          |          |   |          |          |          |   |          |          |          |   |          |          |          |   |          |          |          |   |          |          |          |   |          |          |          |   |          |          |          |   |          |          |          |   |          |          |          |   |          |          |          |   |          |          |         |   |          |          |          |   |          |          |         |   |          |          |         |   |          |          |         |   |          |          |         |   |          |          |         |   |          |          |          |   |          |          |         |   |          |         |         |   |          |         |         |   |          |         |          |   |          |         |         |
| C                                                                                                                                                                                                                      | -1.13721                                                                                                                                                                                                                                                                                                                                                                                                                                                                                                                                                                                                                                                                                                                                                                                                                                                                                                                                                                                                                                                                                                                                                                                                                                                                                                                                                                                                                                                                                                                                                                                                                                                                                                                                                                                                                                                                                                                                                                                                                                                                                                                                                                                                                                                                                                                                                                                                                                                                                                                                                                                                                                                                                                                                                                                                                                                                                                                                                                                                                                                                                                                                           | -1.53826 | -3.46046 |         |          |   |         |         |          |   |         |         |         |   |         |          |          |   |         |         |          |   |         |         |          |   |         |          |          |   |         |         |          |   |         |         |         |   |         |          |          |   |         |         |         |   |         |         |         |   |         |         |         |   |          |         |         |   |          |         |         |   |         |         |         |   |         |         |         |   |          |          |         |   |         |          |         |   |         |         |         |   |         |          |          |   |         |          |          |   |         |          |          |   |         |          |          |   |         |          |          |   |         |          |          |   |          |          |          |   |          |          |          |   |          |          |          |   |          |          |          |   |          |         |         |   |          |         |         |   |          |         |         |   |          |         |         |   |          |         |         |   |          |          |         |   |          |          |          |   |          |          |         |   |          |          |         |   |          |          |         |                                                                                                                                                                                                                      |                                                                                                                                                                                                                                                                                                                                                                                                                                                                                                                                                                                                                                                                                                                                                                                                                                                                                                                                                                                                                                                                                                                                                                                                                                                                                                                                                                                                                                                                                                                                                                                                                                                                                                                                                                                                                                                                                                                                                                                                                                                                                                                                                                                                                                                                                                                                                                                                                                                                                                                                                                                                                                                                                                                                                                                                                                                                                                                                         |         |          |         |          |         |          |         |          |         |          |                                                                                                                                                                                                                        |                                                                                                                                                                                                                                                                                                                                                                                                                                                                                                                                                                                                                                                                                                                                                                                                                                                                                                                                                                                                                                                                                                                                                                                                                                                                                                                                                                                                                                                                                                                                                                                                                                                                                                                                                                                                                                                                                                                                                                                                                                                                                                                                                                                                                                                                                                                                                                                                                                                                                                                                                                                                                                                                                                                                                                                                                                                                                                                                                                                                                                                                                                                                                           |   |         |         |          |   |          |         |          |   |          |         |          |   |         |         |          |   |          |         |          |   |          |         |          |   |         |          |          |   |         |         |          |   |         |         |         |   |          |         |          |   |         |          |         |   |         |          |         |   |         |         |         |   |          |          |         |   |          |          |         |   |         |         |         |   |         |         |         |   |          |          |          |   |         |          |          |   |         |          |          |   |          |          |          |   |          |          |          |   |          |          |          |   |          |          |          |   |          |          |          |   |          |          |          |   |          |          |          |   |          |          |          |   |          |          |          |   |          |          |          |   |          |          |         |   |          |          |          |   |          |          |         |   |          |          |         |   |          |          |         |   |          |          |         |   |          |          |         |   |          |          |          |   |          |          |         |   |          |         |         |   |          |         |         |   |          |         |          |   |          |         |         |
| H                                                                                                                                                                                                                      | -1.15496                                                                                                                                                                                                                                                                                                                                                                                                                                                                                                                                                                                                                                                                                                                                                                                                                                                                                                                                                                                                                                                                                                                                                                                                                                                                                                                                                                                                                                                                                                                                                                                                                                                                                                                                                                                                                                                                                                                                                                                                                                                                                                                                                                                                                                                                                                                                                                                                                                                                                                                                                                                                                                                                                                                                                                                                                                                                                                                                                                                                                                                                                                                                           | -2.03875 | -2.48930 |         |          |   |         |         |          |   |         |         |         |   |         |          |          |   |         |         |          |   |         |         |          |   |         |          |          |   |         |         |          |   |         |         |         |   |         |          |          |   |         |         |         |   |         |         |         |   |         |         |         |   |          |         |         |   |          |         |         |   |         |         |         |   |         |         |         |   |          |          |         |   |         |          |         |   |         |         |         |   |         |          |          |   |         |          |          |   |         |          |          |   |         |          |          |   |         |          |          |   |         |          |          |   |          |          |          |   |          |          |          |   |          |          |          |   |          |          |          |   |          |         |         |   |          |         |         |   |          |         |         |   |          |         |         |   |          |         |         |   |          |          |         |   |          |          |          |   |          |          |         |   |          |          |         |   |          |          |         |                                                                                                                                                                                                                      |                                                                                                                                                                                                                                                                                                                                                                                                                                                                                                                                                                                                                                                                                                                                                                                                                                                                                                                                                                                                                                                                                                                                                                                                                                                                                                                                                                                                                                                                                                                                                                                                                                                                                                                                                                                                                                                                                                                                                                                                                                                                                                                                                                                                                                                                                                                                                                                                                                                                                                                                                                                                                                                                                                                                                                                                                                                                                                                                         |         |          |         |          |         |          |         |          |         |          |                                                                                                                                                                                                                        |                                                                                                                                                                                                                                                                                                                                                                                                                                                                                                                                                                                                                                                                                                                                                                                                                                                                                                                                                                                                                                                                                                                                                                                                                                                                                                                                                                                                                                                                                                                                                                                                                                                                                                                                                                                                                                                                                                                                                                                                                                                                                                                                                                                                                                                                                                                                                                                                                                                                                                                                                                                                                                                                                                                                                                                                                                                                                                                                                                                                                                                                                                                                                           |   |         |         |          |   |          |         |          |   |          |         |          |   |         |         |          |   |          |         |          |   |          |         |          |   |         |          |          |   |         |         |          |   |         |         |         |   |          |         |          |   |         |          |         |   |         |          |         |   |         |         |         |   |          |          |         |   |          |          |         |   |         |         |         |   |         |         |         |   |          |          |          |   |         |          |          |   |         |          |          |   |          |          |          |   |          |          |          |   |          |          |          |   |          |          |          |   |          |          |          |   |          |          |          |   |          |          |          |   |          |          |          |   |          |          |          |   |          |          |          |   |          |          |         |   |          |          |          |   |          |          |         |   |          |          |         |   |          |          |         |   |          |          |         |   |          |          |         |   |          |          |          |   |          |          |         |   |          |         |         |   |          |         |         |   |          |         |          |   |          |         |         |
| H                                                                                                                                                                                                                      | -1.11010                                                                                                                                                                                                                                                                                                                                                                                                                                                                                                                                                                                                                                                                                                                                                                                                                                                                                                                                                                                                                                                                                                                                                                                                                                                                                                                                                                                                                                                                                                                                                                                                                                                                                                                                                                                                                                                                                                                                                                                                                                                                                                                                                                                                                                                                                                                                                                                                                                                                                                                                                                                                                                                                                                                                                                                                                                                                                                                                                                                                                                                                                                                                           | -2.30583 | -4.23761 |         |          |   |         |         |          |   |         |         |         |   |         |          |          |   |         |         |          |   |         |         |          |   |         |          |          |   |         |         |          |   |         |         |         |   |         |          |          |   |         |         |         |   |         |         |         |   |         |         |         |   |          |         |         |   |          |         |         |   |         |         |         |   |         |         |         |   |          |          |         |   |         |          |         |   |         |         |         |   |         |          |          |   |         |          |          |   |         |          |          |   |         |          |          |   |         |          |          |   |         |          |          |   |          |          |          |   |          |          |          |   |          |          |          |   |          |          |          |   |          |         |         |   |          |         |         |   |          |         |         |   |          |         |         |   |          |         |         |   |          |          |         |   |          |          |          |   |          |          |         |   |          |          |         |   |          |          |         |                                                                                                                                                                                                                      |                                                                                                                                                                                                                                                                                                                                                                                                                                                                                                                                                                                                                                                                                                                                                                                                                                                                                                                                                                                                                                                                                                                                                                                                                                                                                                                                                                                                                                                                                                                                                                                                                                                                                                                                                                                                                                                                                                                                                                                                                                                                                                                                                                                                                                                                                                                                                                                                                                                                                                                                                                                                                                                                                                                                                                                                                                                                                                                                         |         |          |         |          |         |          |         |          |         |          |                                                                                                                                                                                                                        |                                                                                                                                                                                                                                                                                                                                                                                                                                                                                                                                                                                                                                                                                                                                                                                                                                                                                                                                                                                                                                                                                                                                                                                                                                                                                                                                                                                                                                                                                                                                                                                                                                                                                                                                                                                                                                                                                                                                                                                                                                                                                                                                                                                                                                                                                                                                                                                                                                                                                                                                                                                                                                                                                                                                                                                                                                                                                                                                                                                                                                                                                                                                                           |   |         |         |          |   |          |         |          |   |          |         |          |   |         |         |          |   |          |         |          |   |          |         |          |   |         |          |          |   |         |         |          |   |         |         |         |   |          |         |          |   |         |          |         |   |         |          |         |   |         |         |         |   |          |          |         |   |          |          |         |   |         |         |         |   |         |         |         |   |          |          |          |   |         |          |          |   |         |          |          |   |          |          |          |   |          |          |          |   |          |          |          |   |          |          |          |   |          |          |          |   |          |          |          |   |          |          |          |   |          |          |          |   |          |          |          |   |          |          |          |   |          |          |         |   |          |          |          |   |          |          |         |   |          |          |         |   |          |          |         |   |          |          |         |   |          |          |         |   |          |          |          |   |          |          |         |   |          |         |         |   |          |         |         |   |          |         |          |   |          |         |         |
| H                                                                                                                                                                                                                      | -2.06329                                                                                                                                                                                                                                                                                                                                                                                                                                                                                                                                                                                                                                                                                                                                                                                                                                                                                                                                                                                                                                                                                                                                                                                                                                                                                                                                                                                                                                                                                                                                                                                                                                                                                                                                                                                                                                                                                                                                                                                                                                                                                                                                                                                                                                                                                                                                                                                                                                                                                                                                                                                                                                                                                                                                                                                                                                                                                                                                                                                                                                                                                                                                           | -0.96948 | -3.56286 |         |          |   |         |         |          |   |         |         |         |   |         |          |          |   |         |         |          |   |         |         |          |   |         |          |          |   |         |         |          |   |         |         |         |   |         |          |          |   |         |         |         |   |         |         |         |   |         |         |         |   |          |         |         |   |          |         |         |   |         |         |         |   |         |         |         |   |          |          |         |   |         |          |         |   |         |         |         |   |         |          |          |   |         |          |          |   |         |          |          |   |         |          |          |   |         |          |          |   |         |          |          |   |          |          |          |   |          |          |          |   |          |          |          |   |          |          |          |   |          |         |         |   |          |         |         |   |          |         |         |   |          |         |         |   |          |         |         |   |          |          |         |   |          |          |          |   |          |          |         |   |          |          |         |   |          |          |         |                                                                                                                                                                                                                      |                                                                                                                                                                                                                                                                                                                                                                                                                                                                                                                                                                                                                                                                                                                                                                                                                                                                                                                                                                                                                                                                                                                                                                                                                                                                                                                                                                                                                                                                                                                                                                                                                                                                                                                                                                                                                                                                                                                                                                                                                                                                                                                                                                                                                                                                                                                                                                                                                                                                                                                                                                                                                                                                                                                                                                                                                                                                                                                                         |         |          |         |          |         |          |         |          |         |          |                                                                                                                                                                                                                        |                                                                                                                                                                                                                                                                                                                                                                                                                                                                                                                                                                                                                                                                                                                                                                                                                                                                                                                                                                                                                                                                                                                                                                                                                                                                                                                                                                                                                                                                                                                                                                                                                                                                                                                                                                                                                                                                                                                                                                                                                                                                                                                                                                                                                                                                                                                                                                                                                                                                                                                                                                                                                                                                                                                                                                                                                                                                                                                                                                                                                                                                                                                                                           |   |         |         |          |   |          |         |          |   |          |         |          |   |         |         |          |   |          |         |          |   |          |         |          |   |         |          |          |   |         |         |          |   |         |         |         |   |          |         |          |   |         |          |         |   |         |          |         |   |         |         |         |   |          |          |         |   |          |          |         |   |         |         |         |   |         |         |         |   |          |          |          |   |         |          |          |   |         |          |          |   |          |          |          |   |          |          |          |   |          |          |          |   |          |          |          |   |          |          |          |   |          |          |          |   |          |          |          |   |          |          |          |   |          |          |          |   |          |          |          |   |          |          |         |   |          |          |          |   |          |          |         |   |          |          |         |   |          |          |         |   |          |          |         |   |          |          |         |   |          |          |          |   |          |          |         |   |          |         |         |   |          |         |         |   |          |         |          |   |          |         |         |
| C                                                                                                                                                                                                                      | 0.12074                                                                                                                                                                                                                                                                                                                                                                                                                                                                                                                                                                                                                                                                                                                                                                                                                                                                                                                                                                                                                                                                                                                                                                                                                                                                                                                                                                                                                                                                                                                                                                                                                                                                                                                                                                                                                                                                                                                                                                                                                                                                                                                                                                                                                                                                                                                                                                                                                                                                                                                                                                                                                                                                                                                                                                                                                                                                                                                                                                                                                                                                                                                                            | -1.87395 | 1.16151  |         |          |   |         |         |          |   |         |         |         |   |         |          |          |   |         |         |          |   |         |         |          |   |         |          |          |   |         |         |          |   |         |         |         |   |         |          |          |   |         |         |         |   |         |         |         |   |         |         |         |   |          |         |         |   |          |         |         |   |         |         |         |   |         |         |         |   |          |          |         |   |         |          |         |   |         |         |         |   |         |          |          |   |         |          |          |   |         |          |          |   |         |          |          |   |         |          |          |   |         |          |          |   |          |          |          |   |          |          |          |   |          |          |          |   |          |          |          |   |          |         |         |   |          |         |         |   |          |         |         |   |          |         |         |   |          |         |         |   |          |          |         |   |          |          |          |   |          |          |         |   |          |          |         |   |          |          |         |                                                                                                                                                                                                                      |                                                                                                                                                                                                                                                                                                                                                                                                                                                                                                                                                                                                                                                                                                                                                                                                                                                                                                                                                                                                                                                                                                                                                                                                                                                                                                                                                                                                                                                                                                                                                                                                                                                                                                                                                                                                                                                                                                                                                                                                                                                                                                                                                                                                                                                                                                                                                                                                                                                                                                                                                                                                                                                                                                                                                                                                                                                                                                                                         |         |          |         |          |         |          |         |          |         |          |                                                                                                                                                                                                                        |                                                                                                                                                                                                                                                                                                                                                                                                                                                                                                                                                                                                                                                                                                                                                                                                                                                                                                                                                                                                                                                                                                                                                                                                                                                                                                                                                                                                                                                                                                                                                                                                                                                                                                                                                                                                                                                                                                                                                                                                                                                                                                                                                                                                                                                                                                                                                                                                                                                                                                                                                                                                                                                                                                                                                                                                                                                                                                                                                                                                                                                                                                                                                           |   |         |         |          |   |          |         |          |   |          |         |          |   |         |         |          |   |          |         |          |   |          |         |          |   |         |          |          |   |         |         |          |   |         |         |         |   |          |         |          |   |         |          |         |   |         |          |         |   |         |         |         |   |          |          |         |   |          |          |         |   |         |         |         |   |         |         |         |   |          |          |          |   |         |          |          |   |         |          |          |   |          |          |          |   |          |          |          |   |          |          |          |   |          |          |          |   |          |          |          |   |          |          |          |   |          |          |          |   |          |          |          |   |          |          |          |   |          |          |          |   |          |          |         |   |          |          |          |   |          |          |         |   |          |          |         |   |          |          |         |   |          |          |         |   |          |          |         |   |          |          |          |   |          |          |         |   |          |         |         |   |          |         |         |   |          |         |          |   |          |         |         |
| H                                                                                                                                                                                                                      | 0.81592                                                                                                                                                                                                                                                                                                                                                                                                                                                                                                                                                                                                                                                                                                                                                                                                                                                                                                                                                                                                                                                                                                                                                                                                                                                                                                                                                                                                                                                                                                                                                                                                                                                                                                                                                                                                                                                                                                                                                                                                                                                                                                                                                                                                                                                                                                                                                                                                                                                                                                                                                                                                                                                                                                                                                                                                                                                                                                                                                                                                                                                                                                                                            | -1.75910 | 0.33302  |         |          |   |         |         |          |   |         |         |         |   |         |          |          |   |         |         |          |   |         |         |          |   |         |          |          |   |         |         |          |   |         |         |         |   |         |          |          |   |         |         |         |   |         |         |         |   |         |         |         |   |          |         |         |   |          |         |         |   |         |         |         |   |         |         |         |   |          |          |         |   |         |          |         |   |         |         |         |   |         |          |          |   |         |          |          |   |         |          |          |   |         |          |          |   |         |          |          |   |         |          |          |   |          |          |          |   |          |          |          |   |          |          |          |   |          |          |          |   |          |         |         |   |          |         |         |   |          |         |         |   |          |         |         |   |          |         |         |   |          |          |         |   |          |          |          |   |          |          |         |   |          |          |         |   |          |          |         |                                                                                                                                                                                                                      |                                                                                                                                                                                                                                                                                                                                                                                                                                                                                                                                                                                                                                                                                                                                                                                                                                                                                                                                                                                                                                                                                                                                                                                                                                                                                                                                                                                                                                                                                                                                                                                                                                                                                                                                                                                                                                                                                                                                                                                                                                                                                                                                                                                                                                                                                                                                                                                                                                                                                                                                                                                                                                                                                                                                                                                                                                                                                                                                         |         |          |         |          |         |          |         |          |         |          |                                                                                                                                                                                                                        |                                                                                                                                                                                                                                                                                                                                                                                                                                                                                                                                                                                                                                                                                                                                                                                                                                                                                                                                                                                                                                                                                                                                                                                                                                                                                                                                                                                                                                                                                                                                                                                                                                                                                                                                                                                                                                                                                                                                                                                                                                                                                                                                                                                                                                                                                                                                                                                                                                                                                                                                                                                                                                                                                                                                                                                                                                                                                                                                                                                                                                                                                                                                                           |   |         |         |          |   |          |         |          |   |          |         |          |   |         |         |          |   |          |         |          |   |          |         |          |   |         |          |          |   |         |         |          |   |         |         |         |   |          |         |          |   |         |          |         |   |         |          |         |   |         |         |         |   |          |          |         |   |          |          |         |   |         |         |         |   |         |         |         |   |          |          |          |   |         |          |          |   |         |          |          |   |          |          |          |   |          |          |          |   |          |          |          |   |          |          |          |   |          |          |          |   |          |          |          |   |          |          |          |   |          |          |          |   |          |          |          |   |          |          |          |   |          |          |         |   |          |          |          |   |          |          |         |   |          |          |         |   |          |          |         |   |          |          |         |   |          |          |         |   |          |          |          |   |          |          |         |   |          |         |         |   |          |         |         |   |          |         |          |   |          |         |         |
| C                                                                                                                                                                                                                      | -1.28325                                                                                                                                                                                                                                                                                                                                                                                                                                                                                                                                                                                                                                                                                                                                                                                                                                                                                                                                                                                                                                                                                                                                                                                                                                                                                                                                                                                                                                                                                                                                                                                                                                                                                                                                                                                                                                                                                                                                                                                                                                                                                                                                                                                                                                                                                                                                                                                                                                                                                                                                                                                                                                                                                                                                                                                                                                                                                                                                                                                                                                                                                                                                           | -2.20041 | 0.62268  |         |          |   |         |         |          |   |         |         |         |   |         |          |          |   |         |         |          |   |         |         |          |   |         |          |          |   |         |         |          |   |         |         |         |   |         |          |          |   |         |         |         |   |         |         |         |   |         |         |         |   |          |         |         |   |          |         |         |   |         |         |         |   |         |         |         |   |          |          |         |   |         |          |         |   |         |         |         |   |         |          |          |   |         |          |          |   |         |          |          |   |         |          |          |   |         |          |          |   |         |          |          |   |          |          |          |   |          |          |          |   |          |          |          |   |          |          |          |   |          |         |         |   |          |         |         |   |          |         |         |   |          |         |         |   |          |         |         |   |          |          |         |   |          |          |          |   |          |          |         |   |          |          |         |   |          |          |         |                                                                                                                                                                                                                      |                                                                                                                                                                                                                                                                                                                                                                                                                                                                                                                                                                                                                                                                                                                                                                                                                                                                                                                                                                                                                                                                                                                                                                                                                                                                                                                                                                                                                                                                                                                                                                                                                                                                                                                                                                                                                                                                                                                                                                                                                                                                                                                                                                                                                                                                                                                                                                                                                                                                                                                                                                                                                                                                                                                                                                                                                                                                                                                                         |         |          |         |          |         |          |         |          |         |          |                                                                                                                                                                                                                        |                                                                                                                                                                                                                                                                                                                                                                                                                                                                                                                                                                                                                                                                                                                                                                                                                                                                                                                                                                                                                                                                                                                                                                                                                                                                                                                                                                                                                                                                                                                                                                                                                                                                                                                                                                                                                                                                                                                                                                                                                                                                                                                                                                                                                                                                                                                                                                                                                                                                                                                                                                                                                                                                                                                                                                                                                                                                                                                                                                                                                                                                                                                                                           |   |         |         |          |   |          |         |          |   |          |         |          |   |         |         |          |   |          |         |          |   |          |         |          |   |         |          |          |   |         |         |          |   |         |         |         |   |          |         |          |   |         |          |         |   |         |          |         |   |         |         |         |   |          |          |         |   |          |          |         |   |         |         |         |   |         |         |         |   |          |          |          |   |         |          |          |   |         |          |          |   |          |          |          |   |          |          |          |   |          |          |          |   |          |          |          |   |          |          |          |   |          |          |          |   |          |          |          |   |          |          |          |   |          |          |          |   |          |          |          |   |          |          |         |   |          |          |          |   |          |          |         |   |          |          |         |   |          |          |         |   |          |          |         |   |          |          |         |   |          |          |          |   |          |          |         |   |          |         |         |   |          |         |         |   |          |         |          |   |          |         |         |
| H                                                                                                                                                                                                                      | -1.94239                                                                                                                                                                                                                                                                                                                                                                                                                                                                                                                                                                                                                                                                                                                                                                                                                                                                                                                                                                                                                                                                                                                                                                                                                                                                                                                                                                                                                                                                                                                                                                                                                                                                                                                                                                                                                                                                                                                                                                                                                                                                                                                                                                                                                                                                                                                                                                                                                                                                                                                                                                                                                                                                                                                                                                                                                                                                                                                                                                                                                                                                                                                                           | -2.43020 | 1.46313  |         |          |   |         |         |          |   |         |         |         |   |         |          |          |   |         |         |          |   |         |         |          |   |         |          |          |   |         |         |          |   |         |         |         |   |         |          |          |   |         |         |         |   |         |         |         |   |         |         |         |   |          |         |         |   |          |         |         |   |         |         |         |   |         |         |         |   |          |          |         |   |         |          |         |   |         |         |         |   |         |          |          |   |         |          |          |   |         |          |          |   |         |          |          |   |         |          |          |   |         |          |          |   |          |          |          |   |          |          |          |   |          |          |          |   |          |          |          |   |          |         |         |   |          |         |         |   |          |         |         |   |          |         |         |   |          |         |         |   |          |          |         |   |          |          |          |   |          |          |         |   |          |          |         |   |          |          |         |                                                                                                                                                                                                                      |                                                                                                                                                                                                                                                                                                                                                                                                                                                                                                                                                                                                                                                                                                                                                                                                                                                                                                                                                                                                                                                                                                                                                                                                                                                                                                                                                                                                                                                                                                                                                                                                                                                                                                                                                                                                                                                                                                                                                                                                                                                                                                                                                                                                                                                                                                                                                                                                                                                                                                                                                                                                                                                                                                                                                                                                                                                                                                                                         |         |          |         |          |         |          |         |          |         |          |                                                                                                                                                                                                                        |                                                                                                                                                                                                                                                                                                                                                                                                                                                                                                                                                                                                                                                                                                                                                                                                                                                                                                                                                                                                                                                                                                                                                                                                                                                                                                                                                                                                                                                                                                                                                                                                                                                                                                                                                                                                                                                                                                                                                                                                                                                                                                                                                                                                                                                                                                                                                                                                                                                                                                                                                                                                                                                                                                                                                                                                                                                                                                                                                                                                                                                                                                                                                           |   |         |         |          |   |          |         |          |   |          |         |          |   |         |         |          |   |          |         |          |   |          |         |          |   |         |          |          |   |         |         |          |   |         |         |         |   |          |         |          |   |         |          |         |   |         |          |         |   |         |         |         |   |          |          |         |   |          |          |         |   |         |         |         |   |         |         |         |   |          |          |          |   |         |          |          |   |         |          |          |   |          |          |          |   |          |          |          |   |          |          |          |   |          |          |          |   |          |          |          |   |          |          |          |   |          |          |          |   |          |          |          |   |          |          |          |   |          |          |          |   |          |          |         |   |          |          |          |   |          |          |         |   |          |          |         |   |          |          |         |   |          |          |         |   |          |          |         |   |          |          |          |   |          |          |         |   |          |         |         |   |          |         |         |   |          |         |          |   |          |         |         |
| H                                                                                                                                                                                                                      | -1.25193                                                                                                                                                                                                                                                                                                                                                                                                                                                                                                                                                                                                                                                                                                                                                                                                                                                                                                                                                                                                                                                                                                                                                                                                                                                                                                                                                                                                                                                                                                                                                                                                                                                                                                                                                                                                                                                                                                                                                                                                                                                                                                                                                                                                                                                                                                                                                                                                                                                                                                                                                                                                                                                                                                                                                                                                                                                                                                                                                                                                                                                                                                                                           | -3.07254 | -0.03575 |         |          |   |         |         |          |   |         |         |         |   |         |          |          |   |         |         |          |   |         |         |          |   |         |          |          |   |         |         |          |   |         |         |         |   |         |          |          |   |         |         |         |   |         |         |         |   |         |         |         |   |          |         |         |   |          |         |         |   |         |         |         |   |         |         |         |   |          |          |         |   |         |          |         |   |         |         |         |   |         |          |          |   |         |          |          |   |         |          |          |   |         |          |          |   |         |          |          |   |         |          |          |   |          |          |          |   |          |          |          |   |          |          |          |   |          |          |          |   |          |         |         |   |          |         |         |   |          |         |         |   |          |         |         |   |          |         |         |   |          |          |         |   |          |          |          |   |          |          |         |   |          |          |         |   |          |          |         |                                                                                                                                                                                                                      |                                                                                                                                                                                                                                                                                                                                                                                                                                                                                                                                                                                                                                                                                                                                                                                                                                                                                                                                                                                                                                                                                                                                                                                                                                                                                                                                                                                                                                                                                                                                                                                                                                                                                                                                                                                                                                                                                                                                                                                                                                                                                                                                                                                                                                                                                                                                                                                                                                                                                                                                                                                                                                                                                                                                                                                                                                                                                                                                         |         |          |         |          |         |          |         |          |         |          |                                                                                                                                                                                                                        |                                                                                                                                                                                                                                                                                                                                                                                                                                                                                                                                                                                                                                                                                                                                                                                                                                                                                                                                                                                                                                                                                                                                                                                                                                                                                                                                                                                                                                                                                                                                                                                                                                                                                                                                                                                                                                                                                                                                                                                                                                                                                                                                                                                                                                                                                                                                                                                                                                                                                                                                                                                                                                                                                                                                                                                                                                                                                                                                                                                                                                                                                                                                                           |   |         |         |          |   |          |         |          |   |          |         |          |   |         |         |          |   |          |         |          |   |          |         |          |   |         |          |          |   |         |         |          |   |         |         |         |   |          |         |          |   |         |          |         |   |         |          |         |   |         |         |         |   |          |          |         |   |          |          |         |   |         |         |         |   |         |         |         |   |          |          |          |   |         |          |          |   |         |          |          |   |          |          |          |   |          |          |          |   |          |          |          |   |          |          |          |   |          |          |          |   |          |          |          |   |          |          |          |   |          |          |          |   |          |          |          |   |          |          |          |   |          |          |         |   |          |          |          |   |          |          |         |   |          |          |         |   |          |          |         |   |          |          |         |   |          |          |         |   |          |          |          |   |          |          |         |   |          |         |         |   |          |         |         |   |          |         |          |   |          |         |         |
| H                                                                                                                                                                                                                      | -1.71630                                                                                                                                                                                                                                                                                                                                                                                                                                                                                                                                                                                                                                                                                                                                                                                                                                                                                                                                                                                                                                                                                                                                                                                                                                                                                                                                                                                                                                                                                                                                                                                                                                                                                                                                                                                                                                                                                                                                                                                                                                                                                                                                                                                                                                                                                                                                                                                                                                                                                                                                                                                                                                                                                                                                                                                                                                                                                                                                                                                                                                                                                                                                           | -1.36564 | 0.07323  |         |          |   |         |         |          |   |         |         |         |   |         |          |          |   |         |         |          |   |         |         |          |   |         |          |          |   |         |         |          |   |         |         |         |   |         |          |          |   |         |         |         |   |         |         |         |   |         |         |         |   |          |         |         |   |          |         |         |   |         |         |         |   |         |         |         |   |          |          |         |   |         |          |         |   |         |         |         |   |         |          |          |   |         |          |          |   |         |          |          |   |         |          |          |   |         |          |          |   |         |          |          |   |          |          |          |   |          |          |          |   |          |          |          |   |          |          |          |   |          |         |         |   |          |         |         |   |          |         |         |   |          |         |         |   |          |         |         |   |          |          |         |   |          |          |          |   |          |          |         |   |          |          |         |   |          |          |         |                                                                                                                                                                                                                      |                                                                                                                                                                                                                                                                                                                                                                                                                                                                                                                                                                                                                                                                                                                                                                                                                                                                                                                                                                                                                                                                                                                                                                                                                                                                                                                                                                                                                                                                                                                                                                                                                                                                                                                                                                                                                                                                                                                                                                                                                                                                                                                                                                                                                                                                                                                                                                                                                                                                                                                                                                                                                                                                                                                                                                                                                                                                                                                                         |         |          |         |          |         |          |         |          |         |          |                                                                                                                                                                                                                        |                                                                                                                                                                                                                                                                                                                                                                                                                                                                                                                                                                                                                                                                                                                                                                                                                                                                                                                                                                                                                                                                                                                                                                                                                                                                                                                                                                                                                                                                                                                                                                                                                                                                                                                                                                                                                                                                                                                                                                                                                                                                                                                                                                                                                                                                                                                                                                                                                                                                                                                                                                                                                                                                                                                                                                                                                                                                                                                                                                                                                                                                                                                                                           |   |         |         |          |   |          |         |          |   |          |         |          |   |         |         |          |   |          |         |          |   |          |         |          |   |         |          |          |   |         |         |          |   |         |         |         |   |          |         |          |   |         |          |         |   |         |          |         |   |         |         |         |   |          |          |         |   |          |          |         |   |         |         |         |   |         |         |         |   |          |          |          |   |         |          |          |   |         |          |          |   |          |          |          |   |          |          |          |   |          |          |          |   |          |          |          |   |          |          |          |   |          |          |          |   |          |          |          |   |          |          |          |   |          |          |          |   |          |          |          |   |          |          |         |   |          |          |          |   |          |          |         |   |          |          |         |   |          |          |         |   |          |          |         |   |          |          |         |   |          |          |          |   |          |          |         |   |          |         |         |   |          |         |         |   |          |         |          |   |          |         |         |
| C                                                                                                                                                                                                                      | 0.64612                                                                                                                                                                                                                                                                                                                                                                                                                                                                                                                                                                                                                                                                                                                                                                                                                                                                                                                                                                                                                                                                                                                                                                                                                                                                                                                                                                                                                                                                                                                                                                                                                                                                                                                                                                                                                                                                                                                                                                                                                                                                                                                                                                                                                                                                                                                                                                                                                                                                                                                                                                                                                                                                                                                                                                                                                                                                                                                                                                                                                                                                                                                                            | -3.08780 | 1.93995  |         |          |   |         |         |          |   |         |         |         |   |         |          |          |   |         |         |          |   |         |         |          |   |         |          |          |   |         |         |          |   |         |         |         |   |         |          |          |   |         |         |         |   |         |         |         |   |         |         |         |   |          |         |         |   |          |         |         |   |         |         |         |   |         |         |         |   |          |          |         |   |         |          |         |   |         |         |         |   |         |          |          |   |         |          |          |   |         |          |          |   |         |          |          |   |         |          |          |   |         |          |          |   |          |          |          |   |          |          |          |   |          |          |          |   |          |          |          |   |          |         |         |   |          |         |         |   |          |         |         |   |          |         |         |   |          |         |         |   |          |          |         |   |          |          |          |   |          |          |         |   |          |          |         |   |          |          |         |                                                                                                                                                                                                                      |                                                                                                                                                                                                                                                                                                                                                                                                                                                                                                                                                                                                                                                                                                                                                                                                                                                                                                                                                                                                                                                                                                                                                                                                                                                                                                                                                                                                                                                                                                                                                                                                                                                                                                                                                                                                                                                                                                                                                                                                                                                                                                                                                                                                                                                                                                                                                                                                                                                                                                                                                                                                                                                                                                                                                                                                                                                                                                                                         |         |          |         |          |         |          |         |          |         |          |                                                                                                                                                                                                                        |                                                                                                                                                                                                                                                                                                                                                                                                                                                                                                                                                                                                                                                                                                                                                                                                                                                                                                                                                                                                                                                                                                                                                                                                                                                                                                                                                                                                                                                                                                                                                                                                                                                                                                                                                                                                                                                                                                                                                                                                                                                                                                                                                                                                                                                                                                                                                                                                                                                                                                                                                                                                                                                                                                                                                                                                                                                                                                                                                                                                                                                                                                                                                           |   |         |         |          |   |          |         |          |   |          |         |          |   |         |         |          |   |          |         |          |   |          |         |          |   |         |          |          |   |         |         |          |   |         |         |         |   |          |         |          |   |         |          |         |   |         |          |         |   |         |         |         |   |          |          |         |   |          |          |         |   |         |         |         |   |         |         |         |   |          |          |          |   |         |          |          |   |         |          |          |   |          |          |          |   |          |          |          |   |          |          |          |   |          |          |          |   |          |          |          |   |          |          |          |   |          |          |          |   |          |          |          |   |          |          |          |   |          |          |          |   |          |          |         |   |          |          |          |   |          |          |         |   |          |          |         |   |          |          |         |   |          |          |         |   |          |          |         |   |          |          |          |   |          |          |         |   |          |         |         |   |          |         |         |   |          |         |          |   |          |         |         |
| H                                                                                                                                                                                                                      | 1.60577                                                                                                                                                                                                                                                                                                                                                                                                                                                                                                                                                                                                                                                                                                                                                                                                                                                                                                                                                                                                                                                                                                                                                                                                                                                                                                                                                                                                                                                                                                                                                                                                                                                                                                                                                                                                                                                                                                                                                                                                                                                                                                                                                                                                                                                                                                                                                                                                                                                                                                                                                                                                                                                                                                                                                                                                                                                                                                                                                                                                                                                                                                                                            | -2.87741 | 2.41502  |         |          |   |         |         |          |   |         |         |         |   |         |          |          |   |         |         |          |   |         |         |          |   |         |          |          |   |         |         |          |   |         |         |         |   |         |          |          |   |         |         |         |   |         |         |         |   |         |         |         |   |          |         |         |   |          |         |         |   |         |         |         |   |         |         |         |   |          |          |         |   |         |          |         |   |         |         |         |   |         |          |          |   |         |          |          |   |         |          |          |   |         |          |          |   |         |          |          |   |         |          |          |   |          |          |          |   |          |          |          |   |          |          |          |   |          |          |          |   |          |         |         |   |          |         |         |   |          |         |         |   |          |         |         |   |          |         |         |   |          |          |         |   |          |          |          |   |          |          |         |   |          |          |         |   |          |          |         |                                                                                                                                                                                                                      |                                                                                                                                                                                                                                                                                                                                                                                                                                                                                                                                                                                                                                                                                                                                                                                                                                                                                                                                                                                                                                                                                                                                                                                                                                                                                                                                                                                                                                                                                                                                                                                                                                                                                                                                                                                                                                                                                                                                                                                                                                                                                                                                                                                                                                                                                                                                                                                                                                                                                                                                                                                                                                                                                                                                                                                                                                                                                                                                         |         |          |         |          |         |          |         |          |         |          |                                                                                                                                                                                                                        |                                                                                                                                                                                                                                                                                                                                                                                                                                                                                                                                                                                                                                                                                                                                                                                                                                                                                                                                                                                                                                                                                                                                                                                                                                                                                                                                                                                                                                                                                                                                                                                                                                                                                                                                                                                                                                                                                                                                                                                                                                                                                                                                                                                                                                                                                                                                                                                                                                                                                                                                                                                                                                                                                                                                                                                                                                                                                                                                                                                                                                                                                                                                                           |   |         |         |          |   |          |         |          |   |          |         |          |   |         |         |          |   |          |         |          |   |          |         |          |   |         |          |          |   |         |         |          |   |         |         |         |   |          |         |          |   |         |          |         |   |         |          |         |   |         |         |         |   |          |          |         |   |          |          |         |   |         |         |         |   |         |         |         |   |          |          |          |   |         |          |          |   |         |          |          |   |          |          |          |   |          |          |          |   |          |          |          |   |          |          |          |   |          |          |          |   |          |          |          |   |          |          |          |   |          |          |          |   |          |          |          |   |          |          |          |   |          |          |         |   |          |          |          |   |          |          |         |   |          |          |         |   |          |          |         |   |          |          |         |   |          |          |         |   |          |          |          |   |          |          |         |   |          |         |         |   |          |         |         |   |          |         |          |   |          |         |         |
| H                                                                                                                                                                                                                      | 0.77874                                                                                                                                                                                                                                                                                                                                                                                                                                                                                                                                                                                                                                                                                                                                                                                                                                                                                                                                                                                                                                                                                                                                                                                                                                                                                                                                                                                                                                                                                                                                                                                                                                                                                                                                                                                                                                                                                                                                                                                                                                                                                                                                                                                                                                                                                                                                                                                                                                                                                                                                                                                                                                                                                                                                                                                                                                                                                                                                                                                                                                                                                                                                            | -3.91865 | 1.24411  |         |          |   |         |         |          |   |         |         |         |   |         |          |          |   |         |         |          |   |         |         |          |   |         |          |          |   |         |         |          |   |         |         |         |   |         |          |          |   |         |         |         |   |         |         |         |   |         |         |         |   |          |         |         |   |          |         |         |   |         |         |         |   |         |         |         |   |          |          |         |   |         |          |         |   |         |         |         |   |         |          |          |   |         |          |          |   |         |          |          |   |         |          |          |   |         |          |          |   |         |          |          |   |          |          |          |   |          |          |          |   |          |          |          |   |          |          |          |   |          |         |         |   |          |         |         |   |          |         |         |   |          |         |         |   |          |         |         |   |          |          |         |   |          |          |          |   |          |          |         |   |          |          |         |   |          |          |         |                                                                                                                                                                                                                      |                                                                                                                                                                                                                                                                                                                                                                                                                                                                                                                                                                                                                                                                                                                                                                                                                                                                                                                                                                                                                                                                                                                                                                                                                                                                                                                                                                                                                                                                                                                                                                                                                                                                                                                                                                                                                                                                                                                                                                                                                                                                                                                                                                                                                                                                                                                                                                                                                                                                                                                                                                                                                                                                                                                                                                                                                                                                                                                                         |         |          |         |          |         |          |         |          |         |          |                                                                                                                                                                                                                        |                                                                                                                                                                                                                                                                                                                                                                                                                                                                                                                                                                                                                                                                                                                                                                                                                                                                                                                                                                                                                                                                                                                                                                                                                                                                                                                                                                                                                                                                                                                                                                                                                                                                                                                                                                                                                                                                                                                                                                                                                                                                                                                                                                                                                                                                                                                                                                                                                                                                                                                                                                                                                                                                                                                                                                                                                                                                                                                                                                                                                                                                                                                                                           |   |         |         |          |   |          |         |          |   |          |         |          |   |         |         |          |   |          |         |          |   |          |         |          |   |         |          |          |   |         |         |          |   |         |         |         |   |          |         |          |   |         |          |         |   |         |          |         |   |         |         |         |   |          |          |         |   |          |          |         |   |         |         |         |   |         |         |         |   |          |          |          |   |         |          |          |   |         |          |          |   |          |          |          |   |          |          |          |   |          |          |          |   |          |          |          |   |          |          |          |   |          |          |          |   |          |          |          |   |          |          |          |   |          |          |          |   |          |          |          |   |          |          |         |   |          |          |          |   |          |          |         |   |          |          |         |   |          |          |         |   |          |          |         |   |          |          |         |   |          |          |          |   |          |          |         |   |          |         |         |   |          |         |         |   |          |         |          |   |          |         |         |
| H                                                                                                                                                                                                                      | -0.05602                                                                                                                                                                                                                                                                                                                                                                                                                                                                                                                                                                                                                                                                                                                                                                                                                                                                                                                                                                                                                                                                                                                                                                                                                                                                                                                                                                                                                                                                                                                                                                                                                                                                                                                                                                                                                                                                                                                                                                                                                                                                                                                                                                                                                                                                                                                                                                                                                                                                                                                                                                                                                                                                                                                                                                                                                                                                                                                                                                                                                                                                                                                                           | -3.41701 | 2.70865  |         |          |   |         |         |          |   |         |         |         |   |         |          |          |   |         |         |          |   |         |         |          |   |         |          |          |   |         |         |          |   |         |         |         |   |         |          |          |   |         |         |         |   |         |         |         |   |         |         |         |   |          |         |         |   |          |         |         |   |         |         |         |   |         |         |         |   |          |          |         |   |         |          |         |   |         |         |         |   |         |          |          |   |         |          |          |   |         |          |          |   |         |          |          |   |         |          |          |   |         |          |          |   |          |          |          |   |          |          |          |   |          |          |          |   |          |          |          |   |          |         |         |   |          |         |         |   |          |         |         |   |          |         |         |   |          |         |         |   |          |          |         |   |          |          |          |   |          |          |         |   |          |          |         |   |          |          |         |                                                                                                                                                                                                                      |                                                                                                                                                                                                                                                                                                                                                                                                                                                                                                                                                                                                                                                                                                                                                                                                                                                                                                                                                                                                                                                                                                                                                                                                                                                                                                                                                                                                                                                                                                                                                                                                                                                                                                                                                                                                                                                                                                                                                                                                                                                                                                                                                                                                                                                                                                                                                                                                                                                                                                                                                                                                                                                                                                                                                                                                                                                                                                                                         |         |          |         |          |         |          |         |          |         |          |                                                                                                                                                                                                                        |                                                                                                                                                                                                                                                                                                                                                                                                                                                                                                                                                                                                                                                                                                                                                                                                                                                                                                                                                                                                                                                                                                                                                                                                                                                                                                                                                                                                                                                                                                                                                                                                                                                                                                                                                                                                                                                                                                                                                                                                                                                                                                                                                                                                                                                                                                                                                                                                                                                                                                                                                                                                                                                                                                                                                                                                                                                                                                                                                                                                                                                                                                                                                           |   |         |         |          |   |          |         |          |   |          |         |          |   |         |         |          |   |          |         |          |   |          |         |          |   |         |          |          |   |         |         |          |   |         |         |         |   |          |         |          |   |         |          |         |   |         |          |         |   |         |         |         |   |          |          |         |   |          |          |         |   |         |         |         |   |         |         |         |   |          |          |          |   |         |          |          |   |         |          |          |   |          |          |          |   |          |          |          |   |          |          |          |   |          |          |          |   |          |          |          |   |          |          |          |   |          |          |          |   |          |          |          |   |          |          |          |   |          |          |          |   |          |          |         |   |          |          |          |   |          |          |         |   |          |          |         |   |          |          |         |   |          |          |         |   |          |          |         |   |          |          |          |   |          |          |         |   |          |         |         |   |          |         |         |   |          |         |          |   |          |         |         |
|  <p><b>1d</b><br/>                     -738.3282311<br/>                     -738.2173902<br/>                     -738.9201264</p> | <table border="1"> <tbody> <tr><td>H</td><td>1.82471</td><td>0.65778</td><td>-3.60744</td></tr> <tr><td>C</td><td>1.57840</td><td>0.60207</td><td>-2.55387</td></tr> <tr><td>C</td><td>0.92156</td><td>0.46493</td><td>0.15837</td></tr> <tr><td>C</td><td>1.11379</td><td>-0.59929</td><td>-2.02467</td></tr> <tr><td>C</td><td>1.73500</td><td>1.72060</td><td>-1.73933</td></tr> <tr><td>C</td><td>1.41347</td><td>1.65255</td><td>-0.39014</td></tr> <tr><td>C</td><td>0.80105</td><td>-0.65044</td><td>-0.66517</td></tr> <tr><td>H</td><td>2.10722</td><td>2.64670</td><td>-2.15866</td></tr> <tr><td>H</td><td>1.52727</td><td>2.52167</td><td>0.24428</td></tr> <tr><td>H</td><td>0.45065</td><td>-1.57978</td><td>-0.23606</td></tr> <tr><td>C</td><td>0.64855</td><td>0.36923</td><td>1.62421</td></tr> <tr><td>C</td><td>0.48075</td><td>0.12526</td><td>4.40453</td></tr> <tr><td>C</td><td>1.78634</td><td>0.15035</td><td>2.40924</td></tr> <tr><td>C</td><td>-0.61929</td><td>0.48203</td><td>2.24133</td></tr> <tr><td>C</td><td>-0.65506</td><td>0.35099</td><td>3.63648</td></tr> <tr><td>C</td><td>1.71862</td><td>0.02584</td><td>3.78924</td></tr> <tr><td>H</td><td>2.74385</td><td>0.07360</td><td>1.90982</td></tr> <tr><td>H</td><td>-1.59645</td><td>0.43174</td><td>4.15554</td></tr> <tr><td>H</td><td>2.61721</td><td>-0.14555</td><td>4.36749</td></tr> <tr><td>H</td><td>0.38945</td><td>0.03310</td><td>5.47924</td></tr> <tr><td>C</td><td>0.94239</td><td>-1.82530</td><td>-2.89536</td></tr> <tr><td>H</td><td>1.24605</td><td>-1.55246</td><td>-3.90992</td></tr> <tr><td>C</td><td>1.83725</td><td>-2.97881</td><td>-2.42374</td></tr> <tr><td>H</td><td>1.56184</td><td>-3.28476</td><td>-1.41173</td></tr> <tr><td>H</td><td>2.88787</td><td>-2.68273</td><td>-2.41352</td></tr> <tr><td>H</td><td>1.72379</td><td>-3.84357</td><td>-3.08181</td></tr> <tr><td>C</td><td>-0.52560</td><td>-2.27072</td><td>-2.94006</td></tr> <tr><td>H</td><td>-0.86815</td><td>-2.55226</td><td>-1.94143</td></tr> <tr><td>H</td><td>-0.64303</td><td>-3.13694</td><td>-3.59548</td></tr> <tr><td>H</td><td>-1.16947</td><td>-1.46759</td><td>-3.30356</td></tr> <tr><td>C</td><td>-1.93100</td><td>0.73734</td><td>1.47067</td></tr> <tr><td>C</td><td>-3.12170</td><td>0.96921</td><td>2.41744</td></tr> <tr><td>H</td><td>-3.33801</td><td>0.08708</td><td>3.02300</td></tr> <tr><td>H</td><td>-4.00580</td><td>1.18484</td><td>1.81537</td></tr> <tr><td>H</td><td>-2.94770</td><td>1.81635</td><td>3.08383</td></tr> <tr><td>C</td><td>-2.29354</td><td>-0.47732</td><td>0.59439</td></tr> <tr><td>H</td><td>-1.57531</td><td>-0.62466</td><td>-0.20676</td></tr> <tr><td>H</td><td>-3.27569</td><td>-0.31604</td><td>0.14207</td></tr> <tr><td>H</td><td>-2.33928</td><td>-1.38642</td><td>1.19837</td></tr> <tr><td>C</td><td>-1.82669</td><td>1.99095</td><td>0.58119</td></tr> <tr><td>H</td><td>-1.52775</td><td>2.85888</td><td>1.17334</td></tr> <tr><td>H</td><td>-2.80500</td><td>2.19813</td><td>0.14013</td></tr> <tr><td>H</td><td>-1.11433</td><td>1.86243</td><td>-0.22823</td></tr> </tbody> </table> | H        | 1.82471  | 0.65778 | -3.60744 | C | 1.57840 | 0.60207 | -2.55387 | C | 0.92156 | 0.46493 | 0.15837 | C | 1.11379 | -0.59929 | -2.02467 | C | 1.73500 | 1.72060 | -1.73933 | C | 1.41347 | 1.65255 | -0.39014 | C | 0.80105 | -0.65044 | -0.66517 | H | 2.10722 | 2.64670 | -2.15866 | H | 1.52727 | 2.52167 | 0.24428 | H | 0.45065 | -1.57978 | -0.23606 | C | 0.64855 | 0.36923 | 1.62421 | C | 0.48075 | 0.12526 | 4.40453 | C | 1.78634 | 0.15035 | 2.40924 | C | -0.61929 | 0.48203 | 2.24133 | C | -0.65506 | 0.35099 | 3.63648 | C | 1.71862 | 0.02584 | 3.78924 | H | 2.74385 | 0.07360 | 1.90982 | H | -1.59645 | 0.43174  | 4.15554 | H | 2.61721 | -0.14555 | 4.36749 | H | 0.38945 | 0.03310 | 5.47924 | C | 0.94239 | -1.82530 | -2.89536 | H | 1.24605 | -1.55246 | -3.90992 | C | 1.83725 | -2.97881 | -2.42374 | H | 1.56184 | -3.28476 | -1.41173 | H | 2.88787 | -2.68273 | -2.41352 | H | 1.72379 | -3.84357 | -3.08181 | C | -0.52560 | -2.27072 | -2.94006 | H | -0.86815 | -2.55226 | -1.94143 | H | -0.64303 | -3.13694 | -3.59548 | H | -1.16947 | -1.46759 | -3.30356 | C | -1.93100 | 0.73734 | 1.47067 | C | -3.12170 | 0.96921 | 2.41744 | H | -3.33801 | 0.08708 | 3.02300 | H | -4.00580 | 1.18484 | 1.81537 | H | -2.94770 | 1.81635 | 3.08383 | C | -2.29354 | -0.47732 | 0.59439 | H | -1.57531 | -0.62466 | -0.20676 | H | -3.27569 | -0.31604 | 0.14207 | H | -2.33928 | -1.38642 | 1.19837 | C | -1.82669 | 1.99095  | 0.58119 | H                                                                                                                                                                                                                    | -1.52775                                                                                                                                                                                                                                                                                                                                                                                                                                                                                                                                                                                                                                                                                                                                                                                                                                                                                                                                                                                                                                                                                                                                                                                                                                                                                                                                                                                                                                                                                                                                                                                                                                                                                                                                                                                                                                                                                                                                                                                                                                                                                                                                                                                                                                                                                                                                                                                                                                                                                                                                                                                                                                                                                                                                                                                                                                                                                                                                | 2.85888 | 1.17334  | H       | -2.80500 | 2.19813 | 0.14013  | H       | -1.11433 | 1.86243 | -0.22823 |  <p><b>1d</b><br/>                     -738.3067746<br/>                     -738.1952291<br/>                     -738.8991152</p> | <table border="1"> <tbody> <tr><td>H</td><td>2.14217</td><td>0.03088</td><td>-4.01763</td></tr> <tr><td>C</td><td>1.87377</td><td>0.02521</td><td>-2.96825</td></tr> <tr><td>C</td><td>1.16358</td><td>0.01063</td><td>-0.19283</td></tr> <tr><td>C</td><td>0.54103</td><td>0.01519</td><td>-2.58784</td></tr> <tr><td>C</td><td>2.85089</td><td>0.02796</td><td>-1.98013</td></tr> <tr><td>C</td><td>2.50693</td><td>0.02099</td><td>-0.36396</td></tr> <tr><td>C</td><td>0.21812</td><td>0.00809</td><td>-1.22945</td></tr> <tr><td>H</td><td>3.89902</td><td>0.03581</td><td>-2.25095</td></tr> <tr><td>H</td><td>3.33088</td><td>0.02411</td><td>0.05196</td></tr> <tr><td>H</td><td>-0.82713</td><td>0.00049</td><td>-1.02063</td></tr> <tr><td>C</td><td>0.85488</td><td>0.00394</td><td>1.29718</td></tr> <tr><td>C</td><td>0.70274</td><td>-0.00392</td><td>4.15429</td></tr> <tr><td>C</td><td>1.98212</td><td>0.00845</td><td>2.14581</td></tr> <tr><td>C</td><td>-0.42148</td><td>-0.00589</td><td>1.96202</td></tr> <tr><td>C</td><td>-0.43413</td><td>-0.00915</td><td>3.36344</td></tr> <tr><td>C</td><td>1.93370</td><td>0.00480</td><td>3.52804</td></tr> <tr><td>H</td><td>2.96994</td><td>0.01530</td><td>1.72341</td></tr> <tr><td>H</td><td>-1.38052</td><td>-0.01626</td><td>3.87609</td></tr> <tr><td>H</td><td>2.85548</td><td>0.00889</td><td>4.09495</td></tr> <tr><td>H</td><td>0.61538</td><td>-0.00687</td><td>5.23298</td></tr> <tr><td>C</td><td>-0.57018</td><td>0.01261</td><td>-3.61735</td></tr> <tr><td>H</td><td>-0.10096</td><td>0.01778</td><td>-4.60512</td></tr> <tr><td>C</td><td>-1.43320</td><td>-1.25145</td><td>-3.50663</td></tr> <tr><td>H</td><td>-1.92239</td><td>-1.29480</td><td>-2.53107</td></tr> <tr><td>H</td><td>-0.82716</td><td>-2.15238</td><td>-3.61955</td></tr> <tr><td>H</td><td>-2.20891</td><td>-1.25305</td><td>-4.27615</td></tr> <tr><td>C</td><td>-1.44502</td><td>1.26787</td><td>-3.49902</td></tr> <tr><td>H</td><td>-1.93422</td><td>1.30076</td><td>-2.52304</td></tr> <tr><td>H</td><td>-2.22092</td><td>1.26687</td><td>-4.26834</td></tr> <tr><td>H</td><td>-0.84740</td><td>2.17506</td><td>-3.60666</td></tr> <tr><td>C</td><td>-1.80128</td><td>-0.01370</td><td>1.27579</td></tr> <tr><td>C</td><td>-2.99676</td><td>-0.02488</td><td>2.25569</td></tr> <tr><td>H</td><td>-3.00392</td><td>-0.91533</td><td>2.88583</td></tr> <tr><td>H</td><td>-3.91322</td><td>-0.03013</td><td>1.66104</td></tr> <tr><td>H</td><td>-3.01699</td><td>0.86226</td><td>2.89019</td></tr> <tr><td>C</td><td>-1.97270</td><td>-1.33248</td><td>0.46920</td></tr> <tr><td>H</td><td>-1.05977</td><td>-1.68827</td><td>0.00217</td></tr> <tr><td>H</td><td>-2.73733</td><td>-1.21315</td><td>-0.30273</td></tr> <tr><td>H</td><td>-2.30402</td><td>-2.11896</td><td>1.14988</td></tr> <tr><td>C</td><td>-1.99155</td><td>1.30674</td><td>0.47603</td></tr> <tr><td>H</td><td>-2.33652</td><td>2.08428</td><td>1.16016</td></tr> <tr><td>H</td><td>-2.75252</td><td>1.17984</td><td>-0.29833</td></tr> <tr><td>H</td><td>-1.08322</td><td>1.67917</td><td>0.01300</td></tr> </tbody> </table> | H | 2.14217 | 0.03088 | -4.01763 | C | 1.87377  | 0.02521 | -2.96825 | C | 1.16358  | 0.01063 | -0.19283 | C | 0.54103 | 0.01519 | -2.58784 | C | 2.85089  | 0.02796 | -1.98013 | C | 2.50693  | 0.02099 | -0.36396 | C | 0.21812 | 0.00809  | -1.22945 | H | 3.89902 | 0.03581 | -2.25095 | H | 3.33088 | 0.02411 | 0.05196 | H | -0.82713 | 0.00049 | -1.02063 | C | 0.85488 | 0.00394  | 1.29718 | C | 0.70274 | -0.00392 | 4.15429 | C | 1.98212 | 0.00845 | 2.14581 | C | -0.42148 | -0.00589 | 1.96202 | C | -0.43413 | -0.00915 | 3.36344 | C | 1.93370 | 0.00480 | 3.52804 | H | 2.96994 | 0.01530 | 1.72341 | H | -1.38052 | -0.01626 | 3.87609  | H | 2.85548 | 0.00889  | 4.09495  | H | 0.61538 | -0.00687 | 5.23298  | C | -0.57018 | 0.01261  | -3.61735 | H | -0.10096 | 0.01778  | -4.60512 | C | -1.43320 | -1.25145 | -3.50663 | H | -1.92239 | -1.29480 | -2.53107 | H | -0.82716 | -2.15238 | -3.61955 | H | -2.20891 | -1.25305 | -4.27615 | C | -1.44502 | 1.26787  | -3.49902 | H | -1.93422 | 1.30076  | -2.52304 | H | -2.22092 | 1.26687  | -4.26834 | H | -0.84740 | 2.17506  | -3.60666 | C | -1.80128 | -0.01370 | 1.27579 | C | -2.99676 | -0.02488 | 2.25569  | H | -3.00392 | -0.91533 | 2.88583 | H | -3.91322 | -0.03013 | 1.66104 | H | -3.01699 | 0.86226  | 2.89019 | C | -1.97270 | -1.33248 | 0.46920 | H | -1.05977 | -1.68827 | 0.00217 | H | -2.73733 | -1.21315 | -0.30273 | H | -2.30402 | -2.11896 | 1.14988 | C | -1.99155 | 1.30674 | 0.47603 | H | -2.33652 | 2.08428 | 1.16016 | H | -2.75252 | 1.17984 | -0.29833 | H | -1.08322 | 1.67917 | 0.01300 |
| H                                                                                                                                                                                                                      | 1.82471                                                                                                                                                                                                                                                                                                                                                                                                                                                                                                                                                                                                                                                                                                                                                                                                                                                                                                                                                                                                                                                                                                                                                                                                                                                                                                                                                                                                                                                                                                                                                                                                                                                                                                                                                                                                                                                                                                                                                                                                                                                                                                                                                                                                                                                                                                                                                                                                                                                                                                                                                                                                                                                                                                                                                                                                                                                                                                                                                                                                                                                                                                                                            | 0.65778  | -3.60744 |         |          |   |         |         |          |   |         |         |         |   |         |          |          |   |         |         |          |   |         |         |          |   |         |          |          |   |         |         |          |   |         |         |         |   |         |          |          |   |         |         |         |   |         |         |         |   |         |         |         |   |          |         |         |   |          |         |         |   |         |         |         |   |         |         |         |   |          |          |         |   |         |          |         |   |         |         |         |   |         |          |          |   |         |          |          |   |         |          |          |   |         |          |          |   |         |          |          |   |         |          |          |   |          |          |          |   |          |          |          |   |          |          |          |   |          |          |          |   |          |         |         |   |          |         |         |   |          |         |         |   |          |         |         |   |          |         |         |   |          |          |         |   |          |          |          |   |          |          |         |   |          |          |         |   |          |          |         |                                                                                                                                                                                                                      |                                                                                                                                                                                                                                                                                                                                                                                                                                                                                                                                                                                                                                                                                                                                                                                                                                                                                                                                                                                                                                                                                                                                                                                                                                                                                                                                                                                                                                                                                                                                                                                                                                                                                                                                                                                                                                                                                                                                                                                                                                                                                                                                                                                                                                                                                                                                                                                                                                                                                                                                                                                                                                                                                                                                                                                                                                                                                                                                         |         |          |         |          |         |          |         |          |         |          |                                                                                                                                                                                                                        |                                                                                                                                                                                                                                                                                                                                                                                                                                                                                                                                                                                                                                                                                                                                                                                                                                                                                                                                                                                                                                                                                                                                                                                                                                                                                                                                                                                                                                                                                                                                                                                                                                                                                                                                                                                                                                                                                                                                                                                                                                                                                                                                                                                                                                                                                                                                                                                                                                                                                                                                                                                                                                                                                                                                                                                                                                                                                                                                                                                                                                                                                                                                                           |   |         |         |          |   |          |         |          |   |          |         |          |   |         |         |          |   |          |         |          |   |          |         |          |   |         |          |          |   |         |         |          |   |         |         |         |   |          |         |          |   |         |          |         |   |         |          |         |   |         |         |         |   |          |          |         |   |          |          |         |   |         |         |         |   |         |         |         |   |          |          |          |   |         |          |          |   |         |          |          |   |          |          |          |   |          |          |          |   |          |          |          |   |          |          |          |   |          |          |          |   |          |          |          |   |          |          |          |   |          |          |          |   |          |          |          |   |          |          |          |   |          |          |         |   |          |          |          |   |          |          |         |   |          |          |         |   |          |          |         |   |          |          |         |   |          |          |         |   |          |          |          |   |          |          |         |   |          |         |         |   |          |         |         |   |          |         |          |   |          |         |         |
| C                                                                                                                                                                                                                      | 1.57840                                                                                                                                                                                                                                                                                                                                                                                                                                                                                                                                                                                                                                                                                                                                                                                                                                                                                                                                                                                                                                                                                                                                                                                                                                                                                                                                                                                                                                                                                                                                                                                                                                                                                                                                                                                                                                                                                                                                                                                                                                                                                                                                                                                                                                                                                                                                                                                                                                                                                                                                                                                                                                                                                                                                                                                                                                                                                                                                                                                                                                                                                                                                            | 0.60207  | -2.55387 |         |          |   |         |         |          |   |         |         |         |   |         |          |          |   |         |         |          |   |         |         |          |   |         |          |          |   |         |         |          |   |         |         |         |   |         |          |          |   |         |         |         |   |         |         |         |   |         |         |         |   |          |         |         |   |          |         |         |   |         |         |         |   |         |         |         |   |          |          |         |   |         |          |         |   |         |         |         |   |         |          |          |   |         |          |          |   |         |          |          |   |         |          |          |   |         |          |          |   |         |          |          |   |          |          |          |   |          |          |          |   |          |          |          |   |          |          |          |   |          |         |         |   |          |         |         |   |          |         |         |   |          |         |         |   |          |         |         |   |          |          |         |   |          |          |          |   |          |          |         |   |          |          |         |   |          |          |         |                                                                                                                                                                                                                      |                                                                                                                                                                                                                                                                                                                                                                                                                                                                                                                                                                                                                                                                                                                                                                                                                                                                                                                                                                                                                                                                                                                                                                                                                                                                                                                                                                                                                                                                                                                                                                                                                                                                                                                                                                                                                                                                                                                                                                                                                                                                                                                                                                                                                                                                                                                                                                                                                                                                                                                                                                                                                                                                                                                                                                                                                                                                                                                                         |         |          |         |          |         |          |         |          |         |          |                                                                                                                                                                                                                        |                                                                                                                                                                                                                                                                                                                                                                                                                                                                                                                                                                                                                                                                                                                                                                                                                                                                                                                                                                                                                                                                                                                                                                                                                                                                                                                                                                                                                                                                                                                                                                                                                                                                                                                                                                                                                                                                                                                                                                                                                                                                                                                                                                                                                                                                                                                                                                                                                                                                                                                                                                                                                                                                                                                                                                                                                                                                                                                                                                                                                                                                                                                                                           |   |         |         |          |   |          |         |          |   |          |         |          |   |         |         |          |   |          |         |          |   |          |         |          |   |         |          |          |   |         |         |          |   |         |         |         |   |          |         |          |   |         |          |         |   |         |          |         |   |         |         |         |   |          |          |         |   |          |          |         |   |         |         |         |   |         |         |         |   |          |          |          |   |         |          |          |   |         |          |          |   |          |          |          |   |          |          |          |   |          |          |          |   |          |          |          |   |          |          |          |   |          |          |          |   |          |          |          |   |          |          |          |   |          |          |          |   |          |          |          |   |          |          |         |   |          |          |          |   |          |          |         |   |          |          |         |   |          |          |         |   |          |          |         |   |          |          |         |   |          |          |          |   |          |          |         |   |          |         |         |   |          |         |         |   |          |         |          |   |          |         |         |
| C                                                                                                                                                                                                                      | 0.92156                                                                                                                                                                                                                                                                                                                                                                                                                                                                                                                                                                                                                                                                                                                                                                                                                                                                                                                                                                                                                                                                                                                                                                                                                                                                                                                                                                                                                                                                                                                                                                                                                                                                                                                                                                                                                                                                                                                                                                                                                                                                                                                                                                                                                                                                                                                                                                                                                                                                                                                                                                                                                                                                                                                                                                                                                                                                                                                                                                                                                                                                                                                                            | 0.46493  | 0.15837  |         |          |   |         |         |          |   |         |         |         |   |         |          |          |   |         |         |          |   |         |         |          |   |         |          |          |   |         |         |          |   |         |         |         |   |         |          |          |   |         |         |         |   |         |         |         |   |         |         |         |   |          |         |         |   |          |         |         |   |         |         |         |   |         |         |         |   |          |          |         |   |         |          |         |   |         |         |         |   |         |          |          |   |         |          |          |   |         |          |          |   |         |          |          |   |         |          |          |   |         |          |          |   |          |          |          |   |          |          |          |   |          |          |          |   |          |          |          |   |          |         |         |   |          |         |         |   |          |         |         |   |          |         |         |   |          |         |         |   |          |          |         |   |          |          |          |   |          |          |         |   |          |          |         |   |          |          |         |                                                                                                                                                                                                                      |                                                                                                                                                                                                                                                                                                                                                                                                                                                                                                                                                                                                                                                                                                                                                                                                                                                                                                                                                                                                                                                                                                                                                                                                                                                                                                                                                                                                                                                                                                                                                                                                                                                                                                                                                                                                                                                                                                                                                                                                                                                                                                                                                                                                                                                                                                                                                                                                                                                                                                                                                                                                                                                                                                                                                                                                                                                                                                                                         |         |          |         |          |         |          |         |          |         |          |                                                                                                                                                                                                                        |                                                                                                                                                                                                                                                                                                                                                                                                                                                                                                                                                                                                                                                                                                                                                                                                                                                                                                                                                                                                                                                                                                                                                                                                                                                                                                                                                                                                                                                                                                                                                                                                                                                                                                                                                                                                                                                                                                                                                                                                                                                                                                                                                                                                                                                                                                                                                                                                                                                                                                                                                                                                                                                                                                                                                                                                                                                                                                                                                                                                                                                                                                                                                           |   |         |         |          |   |          |         |          |   |          |         |          |   |         |         |          |   |          |         |          |   |          |         |          |   |         |          |          |   |         |         |          |   |         |         |         |   |          |         |          |   |         |          |         |   |         |          |         |   |         |         |         |   |          |          |         |   |          |          |         |   |         |         |         |   |         |         |         |   |          |          |          |   |         |          |          |   |         |          |          |   |          |          |          |   |          |          |          |   |          |          |          |   |          |          |          |   |          |          |          |   |          |          |          |   |          |          |          |   |          |          |          |   |          |          |          |   |          |          |          |   |          |          |         |   |          |          |          |   |          |          |         |   |          |          |         |   |          |          |         |   |          |          |         |   |          |          |         |   |          |          |          |   |          |          |         |   |          |         |         |   |          |         |         |   |          |         |          |   |          |         |         |
| C                                                                                                                                                                                                                      | 1.11379                                                                                                                                                                                                                                                                                                                                                                                                                                                                                                                                                                                                                                                                                                                                                                                                                                                                                                                                                                                                                                                                                                                                                                                                                                                                                                                                                                                                                                                                                                                                                                                                                                                                                                                                                                                                                                                                                                                                                                                                                                                                                                                                                                                                                                                                                                                                                                                                                                                                                                                                                                                                                                                                                                                                                                                                                                                                                                                                                                                                                                                                                                                                            | -0.59929 | -2.02467 |         |          |   |         |         |          |   |         |         |         |   |         |          |          |   |         |         |          |   |         |         |          |   |         |          |          |   |         |         |          |   |         |         |         |   |         |          |          |   |         |         |         |   |         |         |         |   |         |         |         |   |          |         |         |   |          |         |         |   |         |         |         |   |         |         |         |   |          |          |         |   |         |          |         |   |         |         |         |   |         |          |          |   |         |          |          |   |         |          |          |   |         |          |          |   |         |          |          |   |         |          |          |   |          |          |          |   |          |          |          |   |          |          |          |   |          |          |          |   |          |         |         |   |          |         |         |   |          |         |         |   |          |         |         |   |          |         |         |   |          |          |         |   |          |          |          |   |          |          |         |   |          |          |         |   |          |          |         |                                                                                                                                                                                                                      |                                                                                                                                                                                                                                                                                                                                                                                                                                                                                                                                                                                                                                                                                                                                                                                                                                                                                                                                                                                                                                                                                                                                                                                                                                                                                                                                                                                                                                                                                                                                                                                                                                                                                                                                                                                                                                                                                                                                                                                                                                                                                                                                                                                                                                                                                                                                                                                                                                                                                                                                                                                                                                                                                                                                                                                                                                                                                                                                         |         |          |         |          |         |          |         |          |         |          |                                                                                                                                                                                                                        |                                                                                                                                                                                                                                                                                                                                                                                                                                                                                                                                                                                                                                                                                                                                                                                                                                                                                                                                                                                                                                                                                                                                                                                                                                                                                                                                                                                                                                                                                                                                                                                                                                                                                                                                                                                                                                                                                                                                                                                                                                                                                                                                                                                                                                                                                                                                                                                                                                                                                                                                                                                                                                                                                                                                                                                                                                                                                                                                                                                                                                                                                                                                                           |   |         |         |          |   |          |         |          |   |          |         |          |   |         |         |          |   |          |         |          |   |          |         |          |   |         |          |          |   |         |         |          |   |         |         |         |   |          |         |          |   |         |          |         |   |         |          |         |   |         |         |         |   |          |          |         |   |          |          |         |   |         |         |         |   |         |         |         |   |          |          |          |   |         |          |          |   |         |          |          |   |          |          |          |   |          |          |          |   |          |          |          |   |          |          |          |   |          |          |          |   |          |          |          |   |          |          |          |   |          |          |          |   |          |          |          |   |          |          |          |   |          |          |         |   |          |          |          |   |          |          |         |   |          |          |         |   |          |          |         |   |          |          |         |   |          |          |         |   |          |          |          |   |          |          |         |   |          |         |         |   |          |         |         |   |          |         |          |   |          |         |         |
| C                                                                                                                                                                                                                      | 1.73500                                                                                                                                                                                                                                                                                                                                                                                                                                                                                                                                                                                                                                                                                                                                                                                                                                                                                                                                                                                                                                                                                                                                                                                                                                                                                                                                                                                                                                                                                                                                                                                                                                                                                                                                                                                                                                                                                                                                                                                                                                                                                                                                                                                                                                                                                                                                                                                                                                                                                                                                                                                                                                                                                                                                                                                                                                                                                                                                                                                                                                                                                                                                            | 1.72060  | -1.73933 |         |          |   |         |         |          |   |         |         |         |   |         |          |          |   |         |         |          |   |         |         |          |   |         |          |          |   |         |         |          |   |         |         |         |   |         |          |          |   |         |         |         |   |         |         |         |   |         |         |         |   |          |         |         |   |          |         |         |   |         |         |         |   |         |         |         |   |          |          |         |   |         |          |         |   |         |         |         |   |         |          |          |   |         |          |          |   |         |          |          |   |         |          |          |   |         |          |          |   |         |          |          |   |          |          |          |   |          |          |          |   |          |          |          |   |          |          |          |   |          |         |         |   |          |         |         |   |          |         |         |   |          |         |         |   |          |         |         |   |          |          |         |   |          |          |          |   |          |          |         |   |          |          |         |   |          |          |         |                                                                                                                                                                                                                      |                                                                                                                                                                                                                                                                                                                                                                                                                                                                                                                                                                                                                                                                                                                                                                                                                                                                                                                                                                                                                                                                                                                                                                                                                                                                                                                                                                                                                                                                                                                                                                                                                                                                                                                                                                                                                                                                                                                                                                                                                                                                                                                                                                                                                                                                                                                                                                                                                                                                                                                                                                                                                                                                                                                                                                                                                                                                                                                                         |         |          |         |          |         |          |         |          |         |          |                                                                                                                                                                                                                        |                                                                                                                                                                                                                                                                                                                                                                                                                                                                                                                                                                                                                                                                                                                                                                                                                                                                                                                                                                                                                                                                                                                                                                                                                                                                                                                                                                                                                                                                                                                                                                                                                                                                                                                                                                                                                                                                                                                                                                                                                                                                                                                                                                                                                                                                                                                                                                                                                                                                                                                                                                                                                                                                                                                                                                                                                                                                                                                                                                                                                                                                                                                                                           |   |         |         |          |   |          |         |          |   |          |         |          |   |         |         |          |   |          |         |          |   |          |         |          |   |         |          |          |   |         |         |          |   |         |         |         |   |          |         |          |   |         |          |         |   |         |          |         |   |         |         |         |   |          |          |         |   |          |          |         |   |         |         |         |   |         |         |         |   |          |          |          |   |         |          |          |   |         |          |          |   |          |          |          |   |          |          |          |   |          |          |          |   |          |          |          |   |          |          |          |   |          |          |          |   |          |          |          |   |          |          |          |   |          |          |          |   |          |          |          |   |          |          |         |   |          |          |          |   |          |          |         |   |          |          |         |   |          |          |         |   |          |          |         |   |          |          |         |   |          |          |          |   |          |          |         |   |          |         |         |   |          |         |         |   |          |         |          |   |          |         |         |
| C                                                                                                                                                                                                                      | 1.41347                                                                                                                                                                                                                                                                                                                                                                                                                                                                                                                                                                                                                                                                                                                                                                                                                                                                                                                                                                                                                                                                                                                                                                                                                                                                                                                                                                                                                                                                                                                                                                                                                                                                                                                                                                                                                                                                                                                                                                                                                                                                                                                                                                                                                                                                                                                                                                                                                                                                                                                                                                                                                                                                                                                                                                                                                                                                                                                                                                                                                                                                                                                                            | 1.65255  | -0.39014 |         |          |   |         |         |          |   |         |         |         |   |         |          |          |   |         |         |          |   |         |         |          |   |         |          |          |   |         |         |          |   |         |         |         |   |         |          |          |   |         |         |         |   |         |         |         |   |         |         |         |   |          |         |         |   |          |         |         |   |         |         |         |   |         |         |         |   |          |          |         |   |         |          |         |   |         |         |         |   |         |          |          |   |         |          |          |   |         |          |          |   |         |          |          |   |         |          |          |   |         |          |          |   |          |          |          |   |          |          |          |   |          |          |          |   |          |          |          |   |          |         |         |   |          |         |         |   |          |         |         |   |          |         |         |   |          |         |         |   |          |          |         |   |          |          |          |   |          |          |         |   |          |          |         |   |          |          |         |                                                                                                                                                                                                                      |                                                                                                                                                                                                                                                                                                                                                                                                                                                                                                                                                                                                                                                                                                                                                                                                                                                                                                                                                                                                                                                                                                                                                                                                                                                                                                                                                                                                                                                                                                                                                                                                                                                                                                                                                                                                                                                                                                                                                                                                                                                                                                                                                                                                                                                                                                                                                                                                                                                                                                                                                                                                                                                                                                                                                                                                                                                                                                                                         |         |          |         |          |         |          |         |          |         |          |                                                                                                                                                                                                                        |                                                                                                                                                                                                                                                                                                                                                                                                                                                                                                                                                                                                                                                                                                                                                                                                                                                                                                                                                                                                                                                                                                                                                                                                                                                                                                                                                                                                                                                                                                                                                                                                                                                                                                                                                                                                                                                                                                                                                                                                                                                                                                                                                                                                                                                                                                                                                                                                                                                                                                                                                                                                                                                                                                                                                                                                                                                                                                                                                                                                                                                                                                                                                           |   |         |         |          |   |          |         |          |   |          |         |          |   |         |         |          |   |          |         |          |   |          |         |          |   |         |          |          |   |         |         |          |   |         |         |         |   |          |         |          |   |         |          |         |   |         |          |         |   |         |         |         |   |          |          |         |   |          |          |         |   |         |         |         |   |         |         |         |   |          |          |          |   |         |          |          |   |         |          |          |   |          |          |          |   |          |          |          |   |          |          |          |   |          |          |          |   |          |          |          |   |          |          |          |   |          |          |          |   |          |          |          |   |          |          |          |   |          |          |          |   |          |          |         |   |          |          |          |   |          |          |         |   |          |          |         |   |          |          |         |   |          |          |         |   |          |          |         |   |          |          |          |   |          |          |         |   |          |         |         |   |          |         |         |   |          |         |          |   |          |         |         |
| C                                                                                                                                                                                                                      | 0.80105                                                                                                                                                                                                                                                                                                                                                                                                                                                                                                                                                                                                                                                                                                                                                                                                                                                                                                                                                                                                                                                                                                                                                                                                                                                                                                                                                                                                                                                                                                                                                                                                                                                                                                                                                                                                                                                                                                                                                                                                                                                                                                                                                                                                                                                                                                                                                                                                                                                                                                                                                                                                                                                                                                                                                                                                                                                                                                                                                                                                                                                                                                                                            | -0.65044 | -0.66517 |         |          |   |         |         |          |   |         |         |         |   |         |          |          |   |         |         |          |   |         |         |          |   |         |          |          |   |         |         |          |   |         |         |         |   |         |          |          |   |         |         |         |   |         |         |         |   |         |         |         |   |          |         |         |   |          |         |         |   |         |         |         |   |         |         |         |   |          |          |         |   |         |          |         |   |         |         |         |   |         |          |          |   |         |          |          |   |         |          |          |   |         |          |          |   |         |          |          |   |         |          |          |   |          |          |          |   |          |          |          |   |          |          |          |   |          |          |          |   |          |         |         |   |          |         |         |   |          |         |         |   |          |         |         |   |          |         |         |   |          |          |         |   |          |          |          |   |          |          |         |   |          |          |         |   |          |          |         |                                                                                                                                                                                                                      |                                                                                                                                                                                                                                                                                                                                                                                                                                                                                                                                                                                                                                                                                                                                                                                                                                                                                                                                                                                                                                                                                                                                                                                                                                                                                                                                                                                                                                                                                                                                                                                                                                                                                                                                                                                                                                                                                                                                                                                                                                                                                                                                                                                                                                                                                                                                                                                                                                                                                                                                                                                                                                                                                                                                                                                                                                                                                                                                         |         |          |         |          |         |          |         |          |         |          |                                                                                                                                                                                                                        |                                                                                                                                                                                                                                                                                                                                                                                                                                                                                                                                                                                                                                                                                                                                                                                                                                                                                                                                                                                                                                                                                                                                                                                                                                                                                                                                                                                                                                                                                                                                                                                                                                                                                                                                                                                                                                                                                                                                                                                                                                                                                                                                                                                                                                                                                                                                                                                                                                                                                                                                                                                                                                                                                                                                                                                                                                                                                                                                                                                                                                                                                                                                                           |   |         |         |          |   |          |         |          |   |          |         |          |   |         |         |          |   |          |         |          |   |          |         |          |   |         |          |          |   |         |         |          |   |         |         |         |   |          |         |          |   |         |          |         |   |         |          |         |   |         |         |         |   |          |          |         |   |          |          |         |   |         |         |         |   |         |         |         |   |          |          |          |   |         |          |          |   |         |          |          |   |          |          |          |   |          |          |          |   |          |          |          |   |          |          |          |   |          |          |          |   |          |          |          |   |          |          |          |   |          |          |          |   |          |          |          |   |          |          |          |   |          |          |         |   |          |          |          |   |          |          |         |   |          |          |         |   |          |          |         |   |          |          |         |   |          |          |         |   |          |          |          |   |          |          |         |   |          |         |         |   |          |         |         |   |          |         |          |   |          |         |         |
| H                                                                                                                                                                                                                      | 2.10722                                                                                                                                                                                                                                                                                                                                                                                                                                                                                                                                                                                                                                                                                                                                                                                                                                                                                                                                                                                                                                                                                                                                                                                                                                                                                                                                                                                                                                                                                                                                                                                                                                                                                                                                                                                                                                                                                                                                                                                                                                                                                                                                                                                                                                                                                                                                                                                                                                                                                                                                                                                                                                                                                                                                                                                                                                                                                                                                                                                                                                                                                                                                            | 2.64670  | -2.15866 |         |          |   |         |         |          |   |         |         |         |   |         |          |          |   |         |         |          |   |         |         |          |   |         |          |          |   |         |         |          |   |         |         |         |   |         |          |          |   |         |         |         |   |         |         |         |   |         |         |         |   |          |         |         |   |          |         |         |   |         |         |         |   |         |         |         |   |          |          |         |   |         |          |         |   |         |         |         |   |         |          |          |   |         |          |          |   |         |          |          |   |         |          |          |   |         |          |          |   |         |          |          |   |          |          |          |   |          |          |          |   |          |          |          |   |          |          |          |   |          |         |         |   |          |         |         |   |          |         |         |   |          |         |         |   |          |         |         |   |          |          |         |   |          |          |          |   |          |          |         |   |          |          |         |   |          |          |         |                                                                                                                                                                                                                      |                                                                                                                                                                                                                                                                                                                                                                                                                                                                                                                                                                                                                                                                                                                                                                                                                                                                                                                                                                                                                                                                                                                                                                                                                                                                                                                                                                                                                                                                                                                                                                                                                                                                                                                                                                                                                                                                                                                                                                                                                                                                                                                                                                                                                                                                                                                                                                                                                                                                                                                                                                                                                                                                                                                                                                                                                                                                                                                                         |         |          |         |          |         |          |         |          |         |          |                                                                                                                                                                                                                        |                                                                                                                                                                                                                                                                                                                                                                                                                                                                                                                                                                                                                                                                                                                                                                                                                                                                                                                                                                                                                                                                                                                                                                                                                                                                                                                                                                                                                                                                                                                                                                                                                                                                                                                                                                                                                                                                                                                                                                                                                                                                                                                                                                                                                                                                                                                                                                                                                                                                                                                                                                                                                                                                                                                                                                                                                                                                                                                                                                                                                                                                                                                                                           |   |         |         |          |   |          |         |          |   |          |         |          |   |         |         |          |   |          |         |          |   |          |         |          |   |         |          |          |   |         |         |          |   |         |         |         |   |          |         |          |   |         |          |         |   |         |          |         |   |         |         |         |   |          |          |         |   |          |          |         |   |         |         |         |   |         |         |         |   |          |          |          |   |         |          |          |   |         |          |          |   |          |          |          |   |          |          |          |   |          |          |          |   |          |          |          |   |          |          |          |   |          |          |          |   |          |          |          |   |          |          |          |   |          |          |          |   |          |          |          |   |          |          |         |   |          |          |          |   |          |          |         |   |          |          |         |   |          |          |         |   |          |          |         |   |          |          |         |   |          |          |          |   |          |          |         |   |          |         |         |   |          |         |         |   |          |         |          |   |          |         |         |
| H                                                                                                                                                                                                                      | 1.52727                                                                                                                                                                                                                                                                                                                                                                                                                                                                                                                                                                                                                                                                                                                                                                                                                                                                                                                                                                                                                                                                                                                                                                                                                                                                                                                                                                                                                                                                                                                                                                                                                                                                                                                                                                                                                                                                                                                                                                                                                                                                                                                                                                                                                                                                                                                                                                                                                                                                                                                                                                                                                                                                                                                                                                                                                                                                                                                                                                                                                                                                                                                                            | 2.52167  | 0.24428  |         |          |   |         |         |          |   |         |         |         |   |         |          |          |   |         |         |          |   |         |         |          |   |         |          |          |   |         |         |          |   |         |         |         |   |         |          |          |   |         |         |         |   |         |         |         |   |         |         |         |   |          |         |         |   |          |         |         |   |         |         |         |   |         |         |         |   |          |          |         |   |         |          |         |   |         |         |         |   |         |          |          |   |         |          |          |   |         |          |          |   |         |          |          |   |         |          |          |   |         |          |          |   |          |          |          |   |          |          |          |   |          |          |          |   |          |          |          |   |          |         |         |   |          |         |         |   |          |         |         |   |          |         |         |   |          |         |         |   |          |          |         |   |          |          |          |   |          |          |         |   |          |          |         |   |          |          |         |                                                                                                                                                                                                                      |                                                                                                                                                                                                                                                                                                                                                                                                                                                                                                                                                                                                                                                                                                                                                                                                                                                                                                                                                                                                                                                                                                                                                                                                                                                                                                                                                                                                                                                                                                                                                                                                                                                                                                                                                                                                                                                                                                                                                                                                                                                                                                                                                                                                                                                                                                                                                                                                                                                                                                                                                                                                                                                                                                                                                                                                                                                                                                                                         |         |          |         |          |         |          |         |          |         |          |                                                                                                                                                                                                                        |                                                                                                                                                                                                                                                                                                                                                                                                                                                                                                                                                                                                                                                                                                                                                                                                                                                                                                                                                                                                                                                                                                                                                                                                                                                                                                                                                                                                                                                                                                                                                                                                                                                                                                                                                                                                                                                                                                                                                                                                                                                                                                                                                                                                                                                                                                                                                                                                                                                                                                                                                                                                                                                                                                                                                                                                                                                                                                                                                                                                                                                                                                                                                           |   |         |         |          |   |          |         |          |   |          |         |          |   |         |         |          |   |          |         |          |   |          |         |          |   |         |          |          |   |         |         |          |   |         |         |         |   |          |         |          |   |         |          |         |   |         |          |         |   |         |         |         |   |          |          |         |   |          |          |         |   |         |         |         |   |         |         |         |   |          |          |          |   |         |          |          |   |         |          |          |   |          |          |          |   |          |          |          |   |          |          |          |   |          |          |          |   |          |          |          |   |          |          |          |   |          |          |          |   |          |          |          |   |          |          |          |   |          |          |          |   |          |          |         |   |          |          |          |   |          |          |         |   |          |          |         |   |          |          |         |   |          |          |         |   |          |          |         |   |          |          |          |   |          |          |         |   |          |         |         |   |          |         |         |   |          |         |          |   |          |         |         |
| H                                                                                                                                                                                                                      | 0.45065                                                                                                                                                                                                                                                                                                                                                                                                                                                                                                                                                                                                                                                                                                                                                                                                                                                                                                                                                                                                                                                                                                                                                                                                                                                                                                                                                                                                                                                                                                                                                                                                                                                                                                                                                                                                                                                                                                                                                                                                                                                                                                                                                                                                                                                                                                                                                                                                                                                                                                                                                                                                                                                                                                                                                                                                                                                                                                                                                                                                                                                                                                                                            | -1.57978 | -0.23606 |         |          |   |         |         |          |   |         |         |         |   |         |          |          |   |         |         |          |   |         |         |          |   |         |          |          |   |         |         |          |   |         |         |         |   |         |          |          |   |         |         |         |   |         |         |         |   |         |         |         |   |          |         |         |   |          |         |         |   |         |         |         |   |         |         |         |   |          |          |         |   |         |          |         |   |         |         |         |   |         |          |          |   |         |          |          |   |         |          |          |   |         |          |          |   |         |          |          |   |         |          |          |   |          |          |          |   |          |          |          |   |          |          |          |   |          |          |          |   |          |         |         |   |          |         |         |   |          |         |         |   |          |         |         |   |          |         |         |   |          |          |         |   |          |          |          |   |          |          |         |   |          |          |         |   |          |          |         |                                                                                                                                                                                                                      |                                                                                                                                                                                                                                                                                                                                                                                                                                                                                                                                                                                                                                                                                                                                                                                                                                                                                                                                                                                                                                                                                                                                                                                                                                                                                                                                                                                                                                                                                                                                                                                                                                                                                                                                                                                                                                                                                                                                                                                                                                                                                                                                                                                                                                                                                                                                                                                                                                                                                                                                                                                                                                                                                                                                                                                                                                                                                                                                         |         |          |         |          |         |          |         |          |         |          |                                                                                                                                                                                                                        |                                                                                                                                                                                                                                                                                                                                                                                                                                                                                                                                                                                                                                                                                                                                                                                                                                                                                                                                                                                                                                                                                                                                                                                                                                                                                                                                                                                                                                                                                                                                                                                                                                                                                                                                                                                                                                                                                                                                                                                                                                                                                                                                                                                                                                                                                                                                                                                                                                                                                                                                                                                                                                                                                                                                                                                                                                                                                                                                                                                                                                                                                                                                                           |   |         |         |          |   |          |         |          |   |          |         |          |   |         |         |          |   |          |         |          |   |          |         |          |   |         |          |          |   |         |         |          |   |         |         |         |   |          |         |          |   |         |          |         |   |         |          |         |   |         |         |         |   |          |          |         |   |          |          |         |   |         |         |         |   |         |         |         |   |          |          |          |   |         |          |          |   |         |          |          |   |          |          |          |   |          |          |          |   |          |          |          |   |          |          |          |   |          |          |          |   |          |          |          |   |          |          |          |   |          |          |          |   |          |          |          |   |          |          |          |   |          |          |         |   |          |          |          |   |          |          |         |   |          |          |         |   |          |          |         |   |          |          |         |   |          |          |         |   |          |          |          |   |          |          |         |   |          |         |         |   |          |         |         |   |          |         |          |   |          |         |         |
| C                                                                                                                                                                                                                      | 0.64855                                                                                                                                                                                                                                                                                                                                                                                                                                                                                                                                                                                                                                                                                                                                                                                                                                                                                                                                                                                                                                                                                                                                                                                                                                                                                                                                                                                                                                                                                                                                                                                                                                                                                                                                                                                                                                                                                                                                                                                                                                                                                                                                                                                                                                                                                                                                                                                                                                                                                                                                                                                                                                                                                                                                                                                                                                                                                                                                                                                                                                                                                                                                            | 0.36923  | 1.62421  |         |          |   |         |         |          |   |         |         |         |   |         |          |          |   |         |         |          |   |         |         |          |   |         |          |          |   |         |         |          |   |         |         |         |   |         |          |          |   |         |         |         |   |         |         |         |   |         |         |         |   |          |         |         |   |          |         |         |   |         |         |         |   |         |         |         |   |          |          |         |   |         |          |         |   |         |         |         |   |         |          |          |   |         |          |          |   |         |          |          |   |         |          |          |   |         |          |          |   |         |          |          |   |          |          |          |   |          |          |          |   |          |          |          |   |          |          |          |   |          |         |         |   |          |         |         |   |          |         |         |   |          |         |         |   |          |         |         |   |          |          |         |   |          |          |          |   |          |          |         |   |          |          |         |   |          |          |         |                                                                                                                                                                                                                      |                                                                                                                                                                                                                                                                                                                                                                                                                                                                                                                                                                                                                                                                                                                                                                                                                                                                                                                                                                                                                                                                                                                                                                                                                                                                                                                                                                                                                                                                                                                                                                                                                                                                                                                                                                                                                                                                                                                                                                                                                                                                                                                                                                                                                                                                                                                                                                                                                                                                                                                                                                                                                                                                                                                                                                                                                                                                                                                                         |         |          |         |          |         |          |         |          |         |          |                                                                                                                                                                                                                        |                                                                                                                                                                                                                                                                                                                                                                                                                                                                                                                                                                                                                                                                                                                                                                                                                                                                                                                                                                                                                                                                                                                                                                                                                                                                                                                                                                                                                                                                                                                                                                                                                                                                                                                                                                                                                                                                                                                                                                                                                                                                                                                                                                                                                                                                                                                                                                                                                                                                                                                                                                                                                                                                                                                                                                                                                                                                                                                                                                                                                                                                                                                                                           |   |         |         |          |   |          |         |          |   |          |         |          |   |         |         |          |   |          |         |          |   |          |         |          |   |         |          |          |   |         |         |          |   |         |         |         |   |          |         |          |   |         |          |         |   |         |          |         |   |         |         |         |   |          |          |         |   |          |          |         |   |         |         |         |   |         |         |         |   |          |          |          |   |         |          |          |   |         |          |          |   |          |          |          |   |          |          |          |   |          |          |          |   |          |          |          |   |          |          |          |   |          |          |          |   |          |          |          |   |          |          |          |   |          |          |          |   |          |          |          |   |          |          |         |   |          |          |          |   |          |          |         |   |          |          |         |   |          |          |         |   |          |          |         |   |          |          |         |   |          |          |          |   |          |          |         |   |          |         |         |   |          |         |         |   |          |         |          |   |          |         |         |
| C                                                                                                                                                                                                                      | 0.48075                                                                                                                                                                                                                                                                                                                                                                                                                                                                                                                                                                                                                                                                                                                                                                                                                                                                                                                                                                                                                                                                                                                                                                                                                                                                                                                                                                                                                                                                                                                                                                                                                                                                                                                                                                                                                                                                                                                                                                                                                                                                                                                                                                                                                                                                                                                                                                                                                                                                                                                                                                                                                                                                                                                                                                                                                                                                                                                                                                                                                                                                                                                                            | 0.12526  | 4.40453  |         |          |   |         |         |          |   |         |         |         |   |         |          |          |   |         |         |          |   |         |         |          |   |         |          |          |   |         |         |          |   |         |         |         |   |         |          |          |   |         |         |         |   |         |         |         |   |         |         |         |   |          |         |         |   |          |         |         |   |         |         |         |   |         |         |         |   |          |          |         |   |         |          |         |   |         |         |         |   |         |          |          |   |         |          |          |   |         |          |          |   |         |          |          |   |         |          |          |   |         |          |          |   |          |          |          |   |          |          |          |   |          |          |          |   |          |          |          |   |          |         |         |   |          |         |         |   |          |         |         |   |          |         |         |   |          |         |         |   |          |          |         |   |          |          |          |   |          |          |         |   |          |          |         |   |          |          |         |                                                                                                                                                                                                                      |                                                                                                                                                                                                                                                                                                                                                                                                                                                                                                                                                                                                                                                                                                                                                                                                                                                                                                                                                                                                                                                                                                                                                                                                                                                                                                                                                                                                                                                                                                                                                                                                                                                                                                                                                                                                                                                                                                                                                                                                                                                                                                                                                                                                                                                                                                                                                                                                                                                                                                                                                                                                                                                                                                                                                                                                                                                                                                                                         |         |          |         |          |         |          |         |          |         |          |                                                                                                                                                                                                                        |                                                                                                                                                                                                                                                                                                                                                                                                                                                                                                                                                                                                                                                                                                                                                                                                                                                                                                                                                                                                                                                                                                                                                                                                                                                                                                                                                                                                                                                                                                                                                                                                                                                                                                                                                                                                                                                                                                                                                                                                                                                                                                                                                                                                                                                                                                                                                                                                                                                                                                                                                                                                                                                                                                                                                                                                                                                                                                                                                                                                                                                                                                                                                           |   |         |         |          |   |          |         |          |   |          |         |          |   |         |         |          |   |          |         |          |   |          |         |          |   |         |          |          |   |         |         |          |   |         |         |         |   |          |         |          |   |         |          |         |   |         |          |         |   |         |         |         |   |          |          |         |   |          |          |         |   |         |         |         |   |         |         |         |   |          |          |          |   |         |          |          |   |         |          |          |   |          |          |          |   |          |          |          |   |          |          |          |   |          |          |          |   |          |          |          |   |          |          |          |   |          |          |          |   |          |          |          |   |          |          |          |   |          |          |          |   |          |          |         |   |          |          |          |   |          |          |         |   |          |          |         |   |          |          |         |   |          |          |         |   |          |          |         |   |          |          |          |   |          |          |         |   |          |         |         |   |          |         |         |   |          |         |          |   |          |         |         |
| C                                                                                                                                                                                                                      | 1.78634                                                                                                                                                                                                                                                                                                                                                                                                                                                                                                                                                                                                                                                                                                                                                                                                                                                                                                                                                                                                                                                                                                                                                                                                                                                                                                                                                                                                                                                                                                                                                                                                                                                                                                                                                                                                                                                                                                                                                                                                                                                                                                                                                                                                                                                                                                                                                                                                                                                                                                                                                                                                                                                                                                                                                                                                                                                                                                                                                                                                                                                                                                                                            | 0.15035  | 2.40924  |         |          |   |         |         |          |   |         |         |         |   |         |          |          |   |         |         |          |   |         |         |          |   |         |          |          |   |         |         |          |   |         |         |         |   |         |          |          |   |         |         |         |   |         |         |         |   |         |         |         |   |          |         |         |   |          |         |         |   |         |         |         |   |         |         |         |   |          |          |         |   |         |          |         |   |         |         |         |   |         |          |          |   |         |          |          |   |         |          |          |   |         |          |          |   |         |          |          |   |         |          |          |   |          |          |          |   |          |          |          |   |          |          |          |   |          |          |          |   |          |         |         |   |          |         |         |   |          |         |         |   |          |         |         |   |          |         |         |   |          |          |         |   |          |          |          |   |          |          |         |   |          |          |         |   |          |          |         |                                                                                                                                                                                                                      |                                                                                                                                                                                                                                                                                                                                                                                                                                                                                                                                                                                                                                                                                                                                                                                                                                                                                                                                                                                                                                                                                                                                                                                                                                                                                                                                                                                                                                                                                                                                                                                                                                                                                                                                                                                                                                                                                                                                                                                                                                                                                                                                                                                                                                                                                                                                                                                                                                                                                                                                                                                                                                                                                                                                                                                                                                                                                                                                         |         |          |         |          |         |          |         |          |         |          |                                                                                                                                                                                                                        |                                                                                                                                                                                                                                                                                                                                                                                                                                                                                                                                                                                                                                                                                                                                                                                                                                                                                                                                                                                                                                                                                                                                                                                                                                                                                                                                                                                                                                                                                                                                                                                                                                                                                                                                                                                                                                                                                                                                                                                                                                                                                                                                                                                                                                                                                                                                                                                                                                                                                                                                                                                                                                                                                                                                                                                                                                                                                                                                                                                                                                                                                                                                                           |   |         |         |          |   |          |         |          |   |          |         |          |   |         |         |          |   |          |         |          |   |          |         |          |   |         |          |          |   |         |         |          |   |         |         |         |   |          |         |          |   |         |          |         |   |         |          |         |   |         |         |         |   |          |          |         |   |          |          |         |   |         |         |         |   |         |         |         |   |          |          |          |   |         |          |          |   |         |          |          |   |          |          |          |   |          |          |          |   |          |          |          |   |          |          |          |   |          |          |          |   |          |          |          |   |          |          |          |   |          |          |          |   |          |          |          |   |          |          |          |   |          |          |         |   |          |          |          |   |          |          |         |   |          |          |         |   |          |          |         |   |          |          |         |   |          |          |         |   |          |          |          |   |          |          |         |   |          |         |         |   |          |         |         |   |          |         |          |   |          |         |         |
| C                                                                                                                                                                                                                      | -0.61929                                                                                                                                                                                                                                                                                                                                                                                                                                                                                                                                                                                                                                                                                                                                                                                                                                                                                                                                                                                                                                                                                                                                                                                                                                                                                                                                                                                                                                                                                                                                                                                                                                                                                                                                                                                                                                                                                                                                                                                                                                                                                                                                                                                                                                                                                                                                                                                                                                                                                                                                                                                                                                                                                                                                                                                                                                                                                                                                                                                                                                                                                                                                           | 0.48203  | 2.24133  |         |          |   |         |         |          |   |         |         |         |   |         |          |          |   |         |         |          |   |         |         |          |   |         |          |          |   |         |         |          |   |         |         |         |   |         |          |          |   |         |         |         |   |         |         |         |   |         |         |         |   |          |         |         |   |          |         |         |   |         |         |         |   |         |         |         |   |          |          |         |   |         |          |         |   |         |         |         |   |         |          |          |   |         |          |          |   |         |          |          |   |         |          |          |   |         |          |          |   |         |          |          |   |          |          |          |   |          |          |          |   |          |          |          |   |          |          |          |   |          |         |         |   |          |         |         |   |          |         |         |   |          |         |         |   |          |         |         |   |          |          |         |   |          |          |          |   |          |          |         |   |          |          |         |   |          |          |         |                                                                                                                                                                                                                      |                                                                                                                                                                                                                                                                                                                                                                                                                                                                                                                                                                                                                                                                                                                                                                                                                                                                                                                                                                                                                                                                                                                                                                                                                                                                                                                                                                                                                                                                                                                                                                                                                                                                                                                                                                                                                                                                                                                                                                                                                                                                                                                                                                                                                                                                                                                                                                                                                                                                                                                                                                                                                                                                                                                                                                                                                                                                                                                                         |         |          |         |          |         |          |         |          |         |          |                                                                                                                                                                                                                        |                                                                                                                                                                                                                                                                                                                                                                                                                                                                                                                                                                                                                                                                                                                                                                                                                                                                                                                                                                                                                                                                                                                                                                                                                                                                                                                                                                                                                                                                                                                                                                                                                                                                                                                                                                                                                                                                                                                                                                                                                                                                                                                                                                                                                                                                                                                                                                                                                                                                                                                                                                                                                                                                                                                                                                                                                                                                                                                                                                                                                                                                                                                                                           |   |         |         |          |   |          |         |          |   |          |         |          |   |         |         |          |   |          |         |          |   |          |         |          |   |         |          |          |   |         |         |          |   |         |         |         |   |          |         |          |   |         |          |         |   |         |          |         |   |         |         |         |   |          |          |         |   |          |          |         |   |         |         |         |   |         |         |         |   |          |          |          |   |         |          |          |   |         |          |          |   |          |          |          |   |          |          |          |   |          |          |          |   |          |          |          |   |          |          |          |   |          |          |          |   |          |          |          |   |          |          |          |   |          |          |          |   |          |          |          |   |          |          |         |   |          |          |          |   |          |          |         |   |          |          |         |   |          |          |         |   |          |          |         |   |          |          |         |   |          |          |          |   |          |          |         |   |          |         |         |   |          |         |         |   |          |         |          |   |          |         |         |
| C                                                                                                                                                                                                                      | -0.65506                                                                                                                                                                                                                                                                                                                                                                                                                                                                                                                                                                                                                                                                                                                                                                                                                                                                                                                                                                                                                                                                                                                                                                                                                                                                                                                                                                                                                                                                                                                                                                                                                                                                                                                                                                                                                                                                                                                                                                                                                                                                                                                                                                                                                                                                                                                                                                                                                                                                                                                                                                                                                                                                                                                                                                                                                                                                                                                                                                                                                                                                                                                                           | 0.35099  | 3.63648  |         |          |   |         |         |          |   |         |         |         |   |         |          |          |   |         |         |          |   |         |         |          |   |         |          |          |   |         |         |          |   |         |         |         |   |         |          |          |   |         |         |         |   |         |         |         |   |         |         |         |   |          |         |         |   |          |         |         |   |         |         |         |   |         |         |         |   |          |          |         |   |         |          |         |   |         |         |         |   |         |          |          |   |         |          |          |   |         |          |          |   |         |          |          |   |         |          |          |   |         |          |          |   |          |          |          |   |          |          |          |   |          |          |          |   |          |          |          |   |          |         |         |   |          |         |         |   |          |         |         |   |          |         |         |   |          |         |         |   |          |          |         |   |          |          |          |   |          |          |         |   |          |          |         |   |          |          |         |                                                                                                                                                                                                                      |                                                                                                                                                                                                                                                                                                                                                                                                                                                                                                                                                                                                                                                                                                                                                                                                                                                                                                                                                                                                                                                                                                                                                                                                                                                                                                                                                                                                                                                                                                                                                                                                                                                                                                                                                                                                                                                                                                                                                                                                                                                                                                                                                                                                                                                                                                                                                                                                                                                                                                                                                                                                                                                                                                                                                                                                                                                                                                                                         |         |          |         |          |         |          |         |          |         |          |                                                                                                                                                                                                                        |                                                                                                                                                                                                                                                                                                                                                                                                                                                                                                                                                                                                                                                                                                                                                                                                                                                                                                                                                                                                                                                                                                                                                                                                                                                                                                                                                                                                                                                                                                                                                                                                                                                                                                                                                                                                                                                                                                                                                                                                                                                                                                                                                                                                                                                                                                                                                                                                                                                                                                                                                                                                                                                                                                                                                                                                                                                                                                                                                                                                                                                                                                                                                           |   |         |         |          |   |          |         |          |   |          |         |          |   |         |         |          |   |          |         |          |   |          |         |          |   |         |          |          |   |         |         |          |   |         |         |         |   |          |         |          |   |         |          |         |   |         |          |         |   |         |         |         |   |          |          |         |   |          |          |         |   |         |         |         |   |         |         |         |   |          |          |          |   |         |          |          |   |         |          |          |   |          |          |          |   |          |          |          |   |          |          |          |   |          |          |          |   |          |          |          |   |          |          |          |   |          |          |          |   |          |          |          |   |          |          |          |   |          |          |          |   |          |          |         |   |          |          |          |   |          |          |         |   |          |          |         |   |          |          |         |   |          |          |         |   |          |          |         |   |          |          |          |   |          |          |         |   |          |         |         |   |          |         |         |   |          |         |          |   |          |         |         |
| C                                                                                                                                                                                                                      | 1.71862                                                                                                                                                                                                                                                                                                                                                                                                                                                                                                                                                                                                                                                                                                                                                                                                                                                                                                                                                                                                                                                                                                                                                                                                                                                                                                                                                                                                                                                                                                                                                                                                                                                                                                                                                                                                                                                                                                                                                                                                                                                                                                                                                                                                                                                                                                                                                                                                                                                                                                                                                                                                                                                                                                                                                                                                                                                                                                                                                                                                                                                                                                                                            | 0.02584  | 3.78924  |         |          |   |         |         |          |   |         |         |         |   |         |          |          |   |         |         |          |   |         |         |          |   |         |          |          |   |         |         |          |   |         |         |         |   |         |          |          |   |         |         |         |   |         |         |         |   |         |         |         |   |          |         |         |   |          |         |         |   |         |         |         |   |         |         |         |   |          |          |         |   |         |          |         |   |         |         |         |   |         |          |          |   |         |          |          |   |         |          |          |   |         |          |          |   |         |          |          |   |         |          |          |   |          |          |          |   |          |          |          |   |          |          |          |   |          |          |          |   |          |         |         |   |          |         |         |   |          |         |         |   |          |         |         |   |          |         |         |   |          |          |         |   |          |          |          |   |          |          |         |   |          |          |         |   |          |          |         |                                                                                                                                                                                                                      |                                                                                                                                                                                                                                                                                                                                                                                                                                                                                                                                                                                                                                                                                                                                                                                                                                                                                                                                                                                                                                                                                                                                                                                                                                                                                                                                                                                                                                                                                                                                                                                                                                                                                                                                                                                                                                                                                                                                                                                                                                                                                                                                                                                                                                                                                                                                                                                                                                                                                                                                                                                                                                                                                                                                                                                                                                                                                                                                         |         |          |         |          |         |          |         |          |         |          |                                                                                                                                                                                                                        |                                                                                                                                                                                                                                                                                                                                                                                                                                                                                                                                                                                                                                                                                                                                                                                                                                                                                                                                                                                                                                                                                                                                                                                                                                                                                                                                                                                                                                                                                                                                                                                                                                                                                                                                                                                                                                                                                                                                                                                                                                                                                                                                                                                                                                                                                                                                                                                                                                                                                                                                                                                                                                                                                                                                                                                                                                                                                                                                                                                                                                                                                                                                                           |   |         |         |          |   |          |         |          |   |          |         |          |   |         |         |          |   |          |         |          |   |          |         |          |   |         |          |          |   |         |         |          |   |         |         |         |   |          |         |          |   |         |          |         |   |         |          |         |   |         |         |         |   |          |          |         |   |          |          |         |   |         |         |         |   |         |         |         |   |          |          |          |   |         |          |          |   |         |          |          |   |          |          |          |   |          |          |          |   |          |          |          |   |          |          |          |   |          |          |          |   |          |          |          |   |          |          |          |   |          |          |          |   |          |          |          |   |          |          |          |   |          |          |         |   |          |          |          |   |          |          |         |   |          |          |         |   |          |          |         |   |          |          |         |   |          |          |         |   |          |          |          |   |          |          |         |   |          |         |         |   |          |         |         |   |          |         |          |   |          |         |         |
| H                                                                                                                                                                                                                      | 2.74385                                                                                                                                                                                                                                                                                                                                                                                                                                                                                                                                                                                                                                                                                                                                                                                                                                                                                                                                                                                                                                                                                                                                                                                                                                                                                                                                                                                                                                                                                                                                                                                                                                                                                                                                                                                                                                                                                                                                                                                                                                                                                                                                                                                                                                                                                                                                                                                                                                                                                                                                                                                                                                                                                                                                                                                                                                                                                                                                                                                                                                                                                                                                            | 0.07360  | 1.90982  |         |          |   |         |         |          |   |         |         |         |   |         |          |          |   |         |         |          |   |         |         |          |   |         |          |          |   |         |         |          |   |         |         |         |   |         |          |          |   |         |         |         |   |         |         |         |   |         |         |         |   |          |         |         |   |          |         |         |   |         |         |         |   |         |         |         |   |          |          |         |   |         |          |         |   |         |         |         |   |         |          |          |   |         |          |          |   |         |          |          |   |         |          |          |   |         |          |          |   |         |          |          |   |          |          |          |   |          |          |          |   |          |          |          |   |          |          |          |   |          |         |         |   |          |         |         |   |          |         |         |   |          |         |         |   |          |         |         |   |          |          |         |   |          |          |          |   |          |          |         |   |          |          |         |   |          |          |         |                                                                                                                                                                                                                      |                                                                                                                                                                                                                                                                                                                                                                                                                                                                                                                                                                                                                                                                                                                                                                                                                                                                                                                                                                                                                                                                                                                                                                                                                                                                                                                                                                                                                                                                                                                                                                                                                                                                                                                                                                                                                                                                                                                                                                                                                                                                                                                                                                                                                                                                                                                                                                                                                                                                                                                                                                                                                                                                                                                                                                                                                                                                                                                                         |         |          |         |          |         |          |         |          |         |          |                                                                                                                                                                                                                        |                                                                                                                                                                                                                                                                                                                                                                                                                                                                                                                                                                                                                                                                                                                                                                                                                                                                                                                                                                                                                                                                                                                                                                                                                                                                                                                                                                                                                                                                                                                                                                                                                                                                                                                                                                                                                                                                                                                                                                                                                                                                                                                                                                                                                                                                                                                                                                                                                                                                                                                                                                                                                                                                                                                                                                                                                                                                                                                                                                                                                                                                                                                                                           |   |         |         |          |   |          |         |          |   |          |         |          |   |         |         |          |   |          |         |          |   |          |         |          |   |         |          |          |   |         |         |          |   |         |         |         |   |          |         |          |   |         |          |         |   |         |          |         |   |         |         |         |   |          |          |         |   |          |          |         |   |         |         |         |   |         |         |         |   |          |          |          |   |         |          |          |   |         |          |          |   |          |          |          |   |          |          |          |   |          |          |          |   |          |          |          |   |          |          |          |   |          |          |          |   |          |          |          |   |          |          |          |   |          |          |          |   |          |          |          |   |          |          |         |   |          |          |          |   |          |          |         |   |          |          |         |   |          |          |         |   |          |          |         |   |          |          |         |   |          |          |          |   |          |          |         |   |          |         |         |   |          |         |         |   |          |         |          |   |          |         |         |
| H                                                                                                                                                                                                                      | -1.59645                                                                                                                                                                                                                                                                                                                                                                                                                                                                                                                                                                                                                                                                                                                                                                                                                                                                                                                                                                                                                                                                                                                                                                                                                                                                                                                                                                                                                                                                                                                                                                                                                                                                                                                                                                                                                                                                                                                                                                                                                                                                                                                                                                                                                                                                                                                                                                                                                                                                                                                                                                                                                                                                                                                                                                                                                                                                                                                                                                                                                                                                                                                                           | 0.43174  | 4.15554  |         |          |   |         |         |          |   |         |         |         |   |         |          |          |   |         |         |          |   |         |         |          |   |         |          |          |   |         |         |          |   |         |         |         |   |         |          |          |   |         |         |         |   |         |         |         |   |         |         |         |   |          |         |         |   |          |         |         |   |         |         |         |   |         |         |         |   |          |          |         |   |         |          |         |   |         |         |         |   |         |          |          |   |         |          |          |   |         |          |          |   |         |          |          |   |         |          |          |   |         |          |          |   |          |          |          |   |          |          |          |   |          |          |          |   |          |          |          |   |          |         |         |   |          |         |         |   |          |         |         |   |          |         |         |   |          |         |         |   |          |          |         |   |          |          |          |   |          |          |         |   |          |          |         |   |          |          |         |                                                                                                                                                                                                                      |                                                                                                                                                                                                                                                                                                                                                                                                                                                                                                                                                                                                                                                                                                                                                                                                                                                                                                                                                                                                                                                                                                                                                                                                                                                                                                                                                                                                                                                                                                                                                                                                                                                                                                                                                                                                                                                                                                                                                                                                                                                                                                                                                                                                                                                                                                                                                                                                                                                                                                                                                                                                                                                                                                                                                                                                                                                                                                                                         |         |          |         |          |         |          |         |          |         |          |                                                                                                                                                                                                                        |                                                                                                                                                                                                                                                                                                                                                                                                                                                                                                                                                                                                                                                                                                                                                                                                                                                                                                                                                                                                                                                                                                                                                                                                                                                                                                                                                                                                                                                                                                                                                                                                                                                                                                                                                                                                                                                                                                                                                                                                                                                                                                                                                                                                                                                                                                                                                                                                                                                                                                                                                                                                                                                                                                                                                                                                                                                                                                                                                                                                                                                                                                                                                           |   |         |         |          |   |          |         |          |   |          |         |          |   |         |         |          |   |          |         |          |   |          |         |          |   |         |          |          |   |         |         |          |   |         |         |         |   |          |         |          |   |         |          |         |   |         |          |         |   |         |         |         |   |          |          |         |   |          |          |         |   |         |         |         |   |         |         |         |   |          |          |          |   |         |          |          |   |         |          |          |   |          |          |          |   |          |          |          |   |          |          |          |   |          |          |          |   |          |          |          |   |          |          |          |   |          |          |          |   |          |          |          |   |          |          |          |   |          |          |          |   |          |          |         |   |          |          |          |   |          |          |         |   |          |          |         |   |          |          |         |   |          |          |         |   |          |          |         |   |          |          |          |   |          |          |         |   |          |         |         |   |          |         |         |   |          |         |          |   |          |         |         |
| H                                                                                                                                                                                                                      | 2.61721                                                                                                                                                                                                                                                                                                                                                                                                                                                                                                                                                                                                                                                                                                                                                                                                                                                                                                                                                                                                                                                                                                                                                                                                                                                                                                                                                                                                                                                                                                                                                                                                                                                                                                                                                                                                                                                                                                                                                                                                                                                                                                                                                                                                                                                                                                                                                                                                                                                                                                                                                                                                                                                                                                                                                                                                                                                                                                                                                                                                                                                                                                                                            | -0.14555 | 4.36749  |         |          |   |         |         |          |   |         |         |         |   |         |          |          |   |         |         |          |   |         |         |          |   |         |          |          |   |         |         |          |   |         |         |         |   |         |          |          |   |         |         |         |   |         |         |         |   |         |         |         |   |          |         |         |   |          |         |         |   |         |         |         |   |         |         |         |   |          |          |         |   |         |          |         |   |         |         |         |   |         |          |          |   |         |          |          |   |         |          |          |   |         |          |          |   |         |          |          |   |         |          |          |   |          |          |          |   |          |          |          |   |          |          |          |   |          |          |          |   |          |         |         |   |          |         |         |   |          |         |         |   |          |         |         |   |          |         |         |   |          |          |         |   |          |          |          |   |          |          |         |   |          |          |         |   |          |          |         |                                                                                                                                                                                                                      |                                                                                                                                                                                                                                                                                                                                                                                                                                                                                                                                                                                                                                                                                                                                                                                                                                                                                                                                                                                                                                                                                                                                                                                                                                                                                                                                                                                                                                                                                                                                                                                                                                                                                                                                                                                                                                                                                                                                                                                                                                                                                                                                                                                                                                                                                                                                                                                                                                                                                                                                                                                                                                                                                                                                                                                                                                                                                                                                         |         |          |         |          |         |          |         |          |         |          |                                                                                                                                                                                                                        |                                                                                                                                                                                                                                                                                                                                                                                                                                                                                                                                                                                                                                                                                                                                                                                                                                                                                                                                                                                                                                                                                                                                                                                                                                                                                                                                                                                                                                                                                                                                                                                                                                                                                                                                                                                                                                                                                                                                                                                                                                                                                                                                                                                                                                                                                                                                                                                                                                                                                                                                                                                                                                                                                                                                                                                                                                                                                                                                                                                                                                                                                                                                                           |   |         |         |          |   |          |         |          |   |          |         |          |   |         |         |          |   |          |         |          |   |          |         |          |   |         |          |          |   |         |         |          |   |         |         |         |   |          |         |          |   |         |          |         |   |         |          |         |   |         |         |         |   |          |          |         |   |          |          |         |   |         |         |         |   |         |         |         |   |          |          |          |   |         |          |          |   |         |          |          |   |          |          |          |   |          |          |          |   |          |          |          |   |          |          |          |   |          |          |          |   |          |          |          |   |          |          |          |   |          |          |          |   |          |          |          |   |          |          |          |   |          |          |         |   |          |          |          |   |          |          |         |   |          |          |         |   |          |          |         |   |          |          |         |   |          |          |         |   |          |          |          |   |          |          |         |   |          |         |         |   |          |         |         |   |          |         |          |   |          |         |         |
| H                                                                                                                                                                                                                      | 0.38945                                                                                                                                                                                                                                                                                                                                                                                                                                                                                                                                                                                                                                                                                                                                                                                                                                                                                                                                                                                                                                                                                                                                                                                                                                                                                                                                                                                                                                                                                                                                                                                                                                                                                                                                                                                                                                                                                                                                                                                                                                                                                                                                                                                                                                                                                                                                                                                                                                                                                                                                                                                                                                                                                                                                                                                                                                                                                                                                                                                                                                                                                                                                            | 0.03310  | 5.47924  |         |          |   |         |         |          |   |         |         |         |   |         |          |          |   |         |         |          |   |         |         |          |   |         |          |          |   |         |         |          |   |         |         |         |   |         |          |          |   |         |         |         |   |         |         |         |   |         |         |         |   |          |         |         |   |          |         |         |   |         |         |         |   |         |         |         |   |          |          |         |   |         |          |         |   |         |         |         |   |         |          |          |   |         |          |          |   |         |          |          |   |         |          |          |   |         |          |          |   |         |          |          |   |          |          |          |   |          |          |          |   |          |          |          |   |          |          |          |   |          |         |         |   |          |         |         |   |          |         |         |   |          |         |         |   |          |         |         |   |          |          |         |   |          |          |          |   |          |          |         |   |          |          |         |   |          |          |         |                                                                                                                                                                                                                      |                                                                                                                                                                                                                                                                                                                                                                                                                                                                                                                                                                                                                                                                                                                                                                                                                                                                                                                                                                                                                                                                                                                                                                                                                                                                                                                                                                                                                                                                                                                                                                                                                                                                                                                                                                                                                                                                                                                                                                                                                                                                                                                                                                                                                                                                                                                                                                                                                                                                                                                                                                                                                                                                                                                                                                                                                                                                                                                                         |         |          |         |          |         |          |         |          |         |          |                                                                                                                                                                                                                        |                                                                                                                                                                                                                                                                                                                                                                                                                                                                                                                                                                                                                                                                                                                                                                                                                                                                                                                                                                                                                                                                                                                                                                                                                                                                                                                                                                                                                                                                                                                                                                                                                                                                                                                                                                                                                                                                                                                                                                                                                                                                                                                                                                                                                                                                                                                                                                                                                                                                                                                                                                                                                                                                                                                                                                                                                                                                                                                                                                                                                                                                                                                                                           |   |         |         |          |   |          |         |          |   |          |         |          |   |         |         |          |   |          |         |          |   |          |         |          |   |         |          |          |   |         |         |          |   |         |         |         |   |          |         |          |   |         |          |         |   |         |          |         |   |         |         |         |   |          |          |         |   |          |          |         |   |         |         |         |   |         |         |         |   |          |          |          |   |         |          |          |   |         |          |          |   |          |          |          |   |          |          |          |   |          |          |          |   |          |          |          |   |          |          |          |   |          |          |          |   |          |          |          |   |          |          |          |   |          |          |          |   |          |          |          |   |          |          |         |   |          |          |          |   |          |          |         |   |          |          |         |   |          |          |         |   |          |          |         |   |          |          |         |   |          |          |          |   |          |          |         |   |          |         |         |   |          |         |         |   |          |         |          |   |          |         |         |
| C                                                                                                                                                                                                                      | 0.94239                                                                                                                                                                                                                                                                                                                                                                                                                                                                                                                                                                                                                                                                                                                                                                                                                                                                                                                                                                                                                                                                                                                                                                                                                                                                                                                                                                                                                                                                                                                                                                                                                                                                                                                                                                                                                                                                                                                                                                                                                                                                                                                                                                                                                                                                                                                                                                                                                                                                                                                                                                                                                                                                                                                                                                                                                                                                                                                                                                                                                                                                                                                                            | -1.82530 | -2.89536 |         |          |   |         |         |          |   |         |         |         |   |         |          |          |   |         |         |          |   |         |         |          |   |         |          |          |   |         |         |          |   |         |         |         |   |         |          |          |   |         |         |         |   |         |         |         |   |         |         |         |   |          |         |         |   |          |         |         |   |         |         |         |   |         |         |         |   |          |          |         |   |         |          |         |   |         |         |         |   |         |          |          |   |         |          |          |   |         |          |          |   |         |          |          |   |         |          |          |   |         |          |          |   |          |          |          |   |          |          |          |   |          |          |          |   |          |          |          |   |          |         |         |   |          |         |         |   |          |         |         |   |          |         |         |   |          |         |         |   |          |          |         |   |          |          |          |   |          |          |         |   |          |          |         |   |          |          |         |                                                                                                                                                                                                                      |                                                                                                                                                                                                                                                                                                                                                                                                                                                                                                                                                                                                                                                                                                                                                                                                                                                                                                                                                                                                                                                                                                                                                                                                                                                                                                                                                                                                                                                                                                                                                                                                                                                                                                                                                                                                                                                                                                                                                                                                                                                                                                                                                                                                                                                                                                                                                                                                                                                                                                                                                                                                                                                                                                                                                                                                                                                                                                                                         |         |          |         |          |         |          |         |          |         |          |                                                                                                                                                                                                                        |                                                                                                                                                                                                                                                                                                                                                                                                                                                                                                                                                                                                                                                                                                                                                                                                                                                                                                                                                                                                                                                                                                                                                                                                                                                                                                                                                                                                                                                                                                                                                                                                                                                                                                                                                                                                                                                                                                                                                                                                                                                                                                                                                                                                                                                                                                                                                                                                                                                                                                                                                                                                                                                                                                                                                                                                                                                                                                                                                                                                                                                                                                                                                           |   |         |         |          |   |          |         |          |   |          |         |          |   |         |         |          |   |          |         |          |   |          |         |          |   |         |          |          |   |         |         |          |   |         |         |         |   |          |         |          |   |         |          |         |   |         |          |         |   |         |         |         |   |          |          |         |   |          |          |         |   |         |         |         |   |         |         |         |   |          |          |          |   |         |          |          |   |         |          |          |   |          |          |          |   |          |          |          |   |          |          |          |   |          |          |          |   |          |          |          |   |          |          |          |   |          |          |          |   |          |          |          |   |          |          |          |   |          |          |          |   |          |          |         |   |          |          |          |   |          |          |         |   |          |          |         |   |          |          |         |   |          |          |         |   |          |          |         |   |          |          |          |   |          |          |         |   |          |         |         |   |          |         |         |   |          |         |          |   |          |         |         |
| H                                                                                                                                                                                                                      | 1.24605                                                                                                                                                                                                                                                                                                                                                                                                                                                                                                                                                                                                                                                                                                                                                                                                                                                                                                                                                                                                                                                                                                                                                                                                                                                                                                                                                                                                                                                                                                                                                                                                                                                                                                                                                                                                                                                                                                                                                                                                                                                                                                                                                                                                                                                                                                                                                                                                                                                                                                                                                                                                                                                                                                                                                                                                                                                                                                                                                                                                                                                                                                                                            | -1.55246 | -3.90992 |         |          |   |         |         |          |   |         |         |         |   |         |          |          |   |         |         |          |   |         |         |          |   |         |          |          |   |         |         |          |   |         |         |         |   |         |          |          |   |         |         |         |   |         |         |         |   |         |         |         |   |          |         |         |   |          |         |         |   |         |         |         |   |         |         |         |   |          |          |         |   |         |          |         |   |         |         |         |   |         |          |          |   |         |          |          |   |         |          |          |   |         |          |          |   |         |          |          |   |         |          |          |   |          |          |          |   |          |          |          |   |          |          |          |   |          |          |          |   |          |         |         |   |          |         |         |   |          |         |         |   |          |         |         |   |          |         |         |   |          |          |         |   |          |          |          |   |          |          |         |   |          |          |         |   |          |          |         |                                                                                                                                                                                                                      |                                                                                                                                                                                                                                                                                                                                                                                                                                                                                                                                                                                                                                                                                                                                                                                                                                                                                                                                                                                                                                                                                                                                                                                                                                                                                                                                                                                                                                                                                                                                                                                                                                                                                                                                                                                                                                                                                                                                                                                                                                                                                                                                                                                                                                                                                                                                                                                                                                                                                                                                                                                                                                                                                                                                                                                                                                                                                                                                         |         |          |         |          |         |          |         |          |         |          |                                                                                                                                                                                                                        |                                                                                                                                                                                                                                                                                                                                                                                                                                                                                                                                                                                                                                                                                                                                                                                                                                                                                                                                                                                                                                                                                                                                                                                                                                                                                                                                                                                                                                                                                                                                                                                                                                                                                                                                                                                                                                                                                                                                                                                                                                                                                                                                                                                                                                                                                                                                                                                                                                                                                                                                                                                                                                                                                                                                                                                                                                                                                                                                                                                                                                                                                                                                                           |   |         |         |          |   |          |         |          |   |          |         |          |   |         |         |          |   |          |         |          |   |          |         |          |   |         |          |          |   |         |         |          |   |         |         |         |   |          |         |          |   |         |          |         |   |         |          |         |   |         |         |         |   |          |          |         |   |          |          |         |   |         |         |         |   |         |         |         |   |          |          |          |   |         |          |          |   |         |          |          |   |          |          |          |   |          |          |          |   |          |          |          |   |          |          |          |   |          |          |          |   |          |          |          |   |          |          |          |   |          |          |          |   |          |          |          |   |          |          |          |   |          |          |         |   |          |          |          |   |          |          |         |   |          |          |         |   |          |          |         |   |          |          |         |   |          |          |         |   |          |          |          |   |          |          |         |   |          |         |         |   |          |         |         |   |          |         |          |   |          |         |         |
| C                                                                                                                                                                                                                      | 1.83725                                                                                                                                                                                                                                                                                                                                                                                                                                                                                                                                                                                                                                                                                                                                                                                                                                                                                                                                                                                                                                                                                                                                                                                                                                                                                                                                                                                                                                                                                                                                                                                                                                                                                                                                                                                                                                                                                                                                                                                                                                                                                                                                                                                                                                                                                                                                                                                                                                                                                                                                                                                                                                                                                                                                                                                                                                                                                                                                                                                                                                                                                                                                            | -2.97881 | -2.42374 |         |          |   |         |         |          |   |         |         |         |   |         |          |          |   |         |         |          |   |         |         |          |   |         |          |          |   |         |         |          |   |         |         |         |   |         |          |          |   |         |         |         |   |         |         |         |   |         |         |         |   |          |         |         |   |          |         |         |   |         |         |         |   |         |         |         |   |          |          |         |   |         |          |         |   |         |         |         |   |         |          |          |   |         |          |          |   |         |          |          |   |         |          |          |   |         |          |          |   |         |          |          |   |          |          |          |   |          |          |          |   |          |          |          |   |          |          |          |   |          |         |         |   |          |         |         |   |          |         |         |   |          |         |         |   |          |         |         |   |          |          |         |   |          |          |          |   |          |          |         |   |          |          |         |   |          |          |         |                                                                                                                                                                                                                      |                                                                                                                                                                                                                                                                                                                                                                                                                                                                                                                                                                                                                                                                                                                                                                                                                                                                                                                                                                                                                                                                                                                                                                                                                                                                                                                                                                                                                                                                                                                                                                                                                                                                                                                                                                                                                                                                                                                                                                                                                                                                                                                                                                                                                                                                                                                                                                                                                                                                                                                                                                                                                                                                                                                                                                                                                                                                                                                                         |         |          |         |          |         |          |         |          |         |          |                                                                                                                                                                                                                        |                                                                                                                                                                                                                                                                                                                                                                                                                                                                                                                                                                                                                                                                                                                                                                                                                                                                                                                                                                                                                                                                                                                                                                                                                                                                                                                                                                                                                                                                                                                                                                                                                                                                                                                                                                                                                                                                                                                                                                                                                                                                                                                                                                                                                                                                                                                                                                                                                                                                                                                                                                                                                                                                                                                                                                                                                                                                                                                                                                                                                                                                                                                                                           |   |         |         |          |   |          |         |          |   |          |         |          |   |         |         |          |   |          |         |          |   |          |         |          |   |         |          |          |   |         |         |          |   |         |         |         |   |          |         |          |   |         |          |         |   |         |          |         |   |         |         |         |   |          |          |         |   |          |          |         |   |         |         |         |   |         |         |         |   |          |          |          |   |         |          |          |   |         |          |          |   |          |          |          |   |          |          |          |   |          |          |          |   |          |          |          |   |          |          |          |   |          |          |          |   |          |          |          |   |          |          |          |   |          |          |          |   |          |          |          |   |          |          |         |   |          |          |          |   |          |          |         |   |          |          |         |   |          |          |         |   |          |          |         |   |          |          |         |   |          |          |          |   |          |          |         |   |          |         |         |   |          |         |         |   |          |         |          |   |          |         |         |
| H                                                                                                                                                                                                                      | 1.56184                                                                                                                                                                                                                                                                                                                                                                                                                                                                                                                                                                                                                                                                                                                                                                                                                                                                                                                                                                                                                                                                                                                                                                                                                                                                                                                                                                                                                                                                                                                                                                                                                                                                                                                                                                                                                                                                                                                                                                                                                                                                                                                                                                                                                                                                                                                                                                                                                                                                                                                                                                                                                                                                                                                                                                                                                                                                                                                                                                                                                                                                                                                                            | -3.28476 | -1.41173 |         |          |   |         |         |          |   |         |         |         |   |         |          |          |   |         |         |          |   |         |         |          |   |         |          |          |   |         |         |          |   |         |         |         |   |         |          |          |   |         |         |         |   |         |         |         |   |         |         |         |   |          |         |         |   |          |         |         |   |         |         |         |   |         |         |         |   |          |          |         |   |         |          |         |   |         |         |         |   |         |          |          |   |         |          |          |   |         |          |          |   |         |          |          |   |         |          |          |   |         |          |          |   |          |          |          |   |          |          |          |   |          |          |          |   |          |          |          |   |          |         |         |   |          |         |         |   |          |         |         |   |          |         |         |   |          |         |         |   |          |          |         |   |          |          |          |   |          |          |         |   |          |          |         |   |          |          |         |                                                                                                                                                                                                                      |                                                                                                                                                                                                                                                                                                                                                                                                                                                                                                                                                                                                                                                                                                                                                                                                                                                                                                                                                                                                                                                                                                                                                                                                                                                                                                                                                                                                                                                                                                                                                                                                                                                                                                                                                                                                                                                                                                                                                                                                                                                                                                                                                                                                                                                                                                                                                                                                                                                                                                                                                                                                                                                                                                                                                                                                                                                                                                                                         |         |          |         |          |         |          |         |          |         |          |                                                                                                                                                                                                                        |                                                                                                                                                                                                                                                                                                                                                                                                                                                                                                                                                                                                                                                                                                                                                                                                                                                                                                                                                                                                                                                                                                                                                                                                                                                                                                                                                                                                                                                                                                                                                                                                                                                                                                                                                                                                                                                                                                                                                                                                                                                                                                                                                                                                                                                                                                                                                                                                                                                                                                                                                                                                                                                                                                                                                                                                                                                                                                                                                                                                                                                                                                                                                           |   |         |         |          |   |          |         |          |   |          |         |          |   |         |         |          |   |          |         |          |   |          |         |          |   |         |          |          |   |         |         |          |   |         |         |         |   |          |         |          |   |         |          |         |   |         |          |         |   |         |         |         |   |          |          |         |   |          |          |         |   |         |         |         |   |         |         |         |   |          |          |          |   |         |          |          |   |         |          |          |   |          |          |          |   |          |          |          |   |          |          |          |   |          |          |          |   |          |          |          |   |          |          |          |   |          |          |          |   |          |          |          |   |          |          |          |   |          |          |          |   |          |          |         |   |          |          |          |   |          |          |         |   |          |          |         |   |          |          |         |   |          |          |         |   |          |          |         |   |          |          |          |   |          |          |         |   |          |         |         |   |          |         |         |   |          |         |          |   |          |         |         |
| H                                                                                                                                                                                                                      | 2.88787                                                                                                                                                                                                                                                                                                                                                                                                                                                                                                                                                                                                                                                                                                                                                                                                                                                                                                                                                                                                                                                                                                                                                                                                                                                                                                                                                                                                                                                                                                                                                                                                                                                                                                                                                                                                                                                                                                                                                                                                                                                                                                                                                                                                                                                                                                                                                                                                                                                                                                                                                                                                                                                                                                                                                                                                                                                                                                                                                                                                                                                                                                                                            | -2.68273 | -2.41352 |         |          |   |         |         |          |   |         |         |         |   |         |          |          |   |         |         |          |   |         |         |          |   |         |          |          |   |         |         |          |   |         |         |         |   |         |          |          |   |         |         |         |   |         |         |         |   |         |         |         |   |          |         |         |   |          |         |         |   |         |         |         |   |         |         |         |   |          |          |         |   |         |          |         |   |         |         |         |   |         |          |          |   |         |          |          |   |         |          |          |   |         |          |          |   |         |          |          |   |         |          |          |   |          |          |          |   |          |          |          |   |          |          |          |   |          |          |          |   |          |         |         |   |          |         |         |   |          |         |         |   |          |         |         |   |          |         |         |   |          |          |         |   |          |          |          |   |          |          |         |   |          |          |         |   |          |          |         |                                                                                                                                                                                                                      |                                                                                                                                                                                                                                                                                                                                                                                                                                                                                                                                                                                                                                                                                                                                                                                                                                                                                                                                                                                                                                                                                                                                                                                                                                                                                                                                                                                                                                                                                                                                                                                                                                                                                                                                                                                                                                                                                                                                                                                                                                                                                                                                                                                                                                                                                                                                                                                                                                                                                                                                                                                                                                                                                                                                                                                                                                                                                                                                         |         |          |         |          |         |          |         |          |         |          |                                                                                                                                                                                                                        |                                                                                                                                                                                                                                                                                                                                                                                                                                                                                                                                                                                                                                                                                                                                                                                                                                                                                                                                                                                                                                                                                                                                                                                                                                                                                                                                                                                                                                                                                                                                                                                                                                                                                                                                                                                                                                                                                                                                                                                                                                                                                                                                                                                                                                                                                                                                                                                                                                                                                                                                                                                                                                                                                                                                                                                                                                                                                                                                                                                                                                                                                                                                                           |   |         |         |          |   |          |         |          |   |          |         |          |   |         |         |          |   |          |         |          |   |          |         |          |   |         |          |          |   |         |         |          |   |         |         |         |   |          |         |          |   |         |          |         |   |         |          |         |   |         |         |         |   |          |          |         |   |          |          |         |   |         |         |         |   |         |         |         |   |          |          |          |   |         |          |          |   |         |          |          |   |          |          |          |   |          |          |          |   |          |          |          |   |          |          |          |   |          |          |          |   |          |          |          |   |          |          |          |   |          |          |          |   |          |          |          |   |          |          |          |   |          |          |         |   |          |          |          |   |          |          |         |   |          |          |         |   |          |          |         |   |          |          |         |   |          |          |         |   |          |          |          |   |          |          |         |   |          |         |         |   |          |         |         |   |          |         |          |   |          |         |         |
| H                                                                                                                                                                                                                      | 1.72379                                                                                                                                                                                                                                                                                                                                                                                                                                                                                                                                                                                                                                                                                                                                                                                                                                                                                                                                                                                                                                                                                                                                                                                                                                                                                                                                                                                                                                                                                                                                                                                                                                                                                                                                                                                                                                                                                                                                                                                                                                                                                                                                                                                                                                                                                                                                                                                                                                                                                                                                                                                                                                                                                                                                                                                                                                                                                                                                                                                                                                                                                                                                            | -3.84357 | -3.08181 |         |          |   |         |         |          |   |         |         |         |   |         |          |          |   |         |         |          |   |         |         |          |   |         |          |          |   |         |         |          |   |         |         |         |   |         |          |          |   |         |         |         |   |         |         |         |   |         |         |         |   |          |         |         |   |          |         |         |   |         |         |         |   |         |         |         |   |          |          |         |   |         |          |         |   |         |         |         |   |         |          |          |   |         |          |          |   |         |          |          |   |         |          |          |   |         |          |          |   |         |          |          |   |          |          |          |   |          |          |          |   |          |          |          |   |          |          |          |   |          |         |         |   |          |         |         |   |          |         |         |   |          |         |         |   |          |         |         |   |          |          |         |   |          |          |          |   |          |          |         |   |          |          |         |   |          |          |         |                                                                                                                                                                                                                      |                                                                                                                                                                                                                                                                                                                                                                                                                                                                                                                                                                                                                                                                                                                                                                                                                                                                                                                                                                                                                                                                                                                                                                                                                                                                                                                                                                                                                                                                                                                                                                                                                                                                                                                                                                                                                                                                                                                                                                                                                                                                                                                                                                                                                                                                                                                                                                                                                                                                                                                                                                                                                                                                                                                                                                                                                                                                                                                                         |         |          |         |          |         |          |         |          |         |          |                                                                                                                                                                                                                        |                                                                                                                                                                                                                                                                                                                                                                                                                                                                                                                                                                                                                                                                                                                                                                                                                                                                                                                                                                                                                                                                                                                                                                                                                                                                                                                                                                                                                                                                                                                                                                                                                                                                                                                                                                                                                                                                                                                                                                                                                                                                                                                                                                                                                                                                                                                                                                                                                                                                                                                                                                                                                                                                                                                                                                                                                                                                                                                                                                                                                                                                                                                                                           |   |         |         |          |   |          |         |          |   |          |         |          |   |         |         |          |   |          |         |          |   |          |         |          |   |         |          |          |   |         |         |          |   |         |         |         |   |          |         |          |   |         |          |         |   |         |          |         |   |         |         |         |   |          |          |         |   |          |          |         |   |         |         |         |   |         |         |         |   |          |          |          |   |         |          |          |   |         |          |          |   |          |          |          |   |          |          |          |   |          |          |          |   |          |          |          |   |          |          |          |   |          |          |          |   |          |          |          |   |          |          |          |   |          |          |          |   |          |          |          |   |          |          |         |   |          |          |          |   |          |          |         |   |          |          |         |   |          |          |         |   |          |          |         |   |          |          |         |   |          |          |          |   |          |          |         |   |          |         |         |   |          |         |         |   |          |         |          |   |          |         |         |
| C                                                                                                                                                                                                                      | -0.52560                                                                                                                                                                                                                                                                                                                                                                                                                                                                                                                                                                                                                                                                                                                                                                                                                                                                                                                                                                                                                                                                                                                                                                                                                                                                                                                                                                                                                                                                                                                                                                                                                                                                                                                                                                                                                                                                                                                                                                                                                                                                                                                                                                                                                                                                                                                                                                                                                                                                                                                                                                                                                                                                                                                                                                                                                                                                                                                                                                                                                                                                                                                                           | -2.27072 | -2.94006 |         |          |   |         |         |          |   |         |         |         |   |         |          |          |   |         |         |          |   |         |         |          |   |         |          |          |   |         |         |          |   |         |         |         |   |         |          |          |   |         |         |         |   |         |         |         |   |         |         |         |   |          |         |         |   |          |         |         |   |         |         |         |   |         |         |         |   |          |          |         |   |         |          |         |   |         |         |         |   |         |          |          |   |         |          |          |   |         |          |          |   |         |          |          |   |         |          |          |   |         |          |          |   |          |          |          |   |          |          |          |   |          |          |          |   |          |          |          |   |          |         |         |   |          |         |         |   |          |         |         |   |          |         |         |   |          |         |         |   |          |          |         |   |          |          |          |   |          |          |         |   |          |          |         |   |          |          |         |                                                                                                                                                                                                                      |                                                                                                                                                                                                                                                                                                                                                                                                                                                                                                                                                                                                                                                                                                                                                                                                                                                                                                                                                                                                                                                                                                                                                                                                                                                                                                                                                                                                                                                                                                                                                                                                                                                                                                                                                                                                                                                                                                                                                                                                                                                                                                                                                                                                                                                                                                                                                                                                                                                                                                                                                                                                                                                                                                                                                                                                                                                                                                                                         |         |          |         |          |         |          |         |          |         |          |                                                                                                                                                                                                                        |                                                                                                                                                                                                                                                                                                                                                                                                                                                                                                                                                                                                                                                                                                                                                                                                                                                                                                                                                                                                                                                                                                                                                                                                                                                                                                                                                                                                                                                                                                                                                                                                                                                                                                                                                                                                                                                                                                                                                                                                                                                                                                                                                                                                                                                                                                                                                                                                                                                                                                                                                                                                                                                                                                                                                                                                                                                                                                                                                                                                                                                                                                                                                           |   |         |         |          |   |          |         |          |   |          |         |          |   |         |         |          |   |          |         |          |   |          |         |          |   |         |          |          |   |         |         |          |   |         |         |         |   |          |         |          |   |         |          |         |   |         |          |         |   |         |         |         |   |          |          |         |   |          |          |         |   |         |         |         |   |         |         |         |   |          |          |          |   |         |          |          |   |         |          |          |   |          |          |          |   |          |          |          |   |          |          |          |   |          |          |          |   |          |          |          |   |          |          |          |   |          |          |          |   |          |          |          |   |          |          |          |   |          |          |          |   |          |          |         |   |          |          |          |   |          |          |         |   |          |          |         |   |          |          |         |   |          |          |         |   |          |          |         |   |          |          |          |   |          |          |         |   |          |         |         |   |          |         |         |   |          |         |          |   |          |         |         |
| H                                                                                                                                                                                                                      | -0.86815                                                                                                                                                                                                                                                                                                                                                                                                                                                                                                                                                                                                                                                                                                                                                                                                                                                                                                                                                                                                                                                                                                                                                                                                                                                                                                                                                                                                                                                                                                                                                                                                                                                                                                                                                                                                                                                                                                                                                                                                                                                                                                                                                                                                                                                                                                                                                                                                                                                                                                                                                                                                                                                                                                                                                                                                                                                                                                                                                                                                                                                                                                                                           | -2.55226 | -1.94143 |         |          |   |         |         |          |   |         |         |         |   |         |          |          |   |         |         |          |   |         |         |          |   |         |          |          |   |         |         |          |   |         |         |         |   |         |          |          |   |         |         |         |   |         |         |         |   |         |         |         |   |          |         |         |   |          |         |         |   |         |         |         |   |         |         |         |   |          |          |         |   |         |          |         |   |         |         |         |   |         |          |          |   |         |          |          |   |         |          |          |   |         |          |          |   |         |          |          |   |         |          |          |   |          |          |          |   |          |          |          |   |          |          |          |   |          |          |          |   |          |         |         |   |          |         |         |   |          |         |         |   |          |         |         |   |          |         |         |   |          |          |         |   |          |          |          |   |          |          |         |   |          |          |         |   |          |          |         |                                                                                                                                                                                                                      |                                                                                                                                                                                                                                                                                                                                                                                                                                                                                                                                                                                                                                                                                                                                                                                                                                                                                                                                                                                                                                                                                                                                                                                                                                                                                                                                                                                                                                                                                                                                                                                                                                                                                                                                                                                                                                                                                                                                                                                                                                                                                                                                                                                                                                                                                                                                                                                                                                                                                                                                                                                                                                                                                                                                                                                                                                                                                                                                         |         |          |         |          |         |          |         |          |         |          |                                                                                                                                                                                                                        |                                                                                                                                                                                                                                                                                                                                                                                                                                                                                                                                                                                                                                                                                                                                                                                                                                                                                                                                                                                                                                                                                                                                                                                                                                                                                                                                                                                                                                                                                                                                                                                                                                                                                                                                                                                                                                                                                                                                                                                                                                                                                                                                                                                                                                                                                                                                                                                                                                                                                                                                                                                                                                                                                                                                                                                                                                                                                                                                                                                                                                                                                                                                                           |   |         |         |          |   |          |         |          |   |          |         |          |   |         |         |          |   |          |         |          |   |          |         |          |   |         |          |          |   |         |         |          |   |         |         |         |   |          |         |          |   |         |          |         |   |         |          |         |   |         |         |         |   |          |          |         |   |          |          |         |   |         |         |         |   |         |         |         |   |          |          |          |   |         |          |          |   |         |          |          |   |          |          |          |   |          |          |          |   |          |          |          |   |          |          |          |   |          |          |          |   |          |          |          |   |          |          |          |   |          |          |          |   |          |          |          |   |          |          |          |   |          |          |         |   |          |          |          |   |          |          |         |   |          |          |         |   |          |          |         |   |          |          |         |   |          |          |         |   |          |          |          |   |          |          |         |   |          |         |         |   |          |         |         |   |          |         |          |   |          |         |         |
| H                                                                                                                                                                                                                      | -0.64303                                                                                                                                                                                                                                                                                                                                                                                                                                                                                                                                                                                                                                                                                                                                                                                                                                                                                                                                                                                                                                                                                                                                                                                                                                                                                                                                                                                                                                                                                                                                                                                                                                                                                                                                                                                                                                                                                                                                                                                                                                                                                                                                                                                                                                                                                                                                                                                                                                                                                                                                                                                                                                                                                                                                                                                                                                                                                                                                                                                                                                                                                                                                           | -3.13694 | -3.59548 |         |          |   |         |         |          |   |         |         |         |   |         |          |          |   |         |         |          |   |         |         |          |   |         |          |          |   |         |         |          |   |         |         |         |   |         |          |          |   |         |         |         |   |         |         |         |   |         |         |         |   |          |         |         |   |          |         |         |   |         |         |         |   |         |         |         |   |          |          |         |   |         |          |         |   |         |         |         |   |         |          |          |   |         |          |          |   |         |          |          |   |         |          |          |   |         |          |          |   |         |          |          |   |          |          |          |   |          |          |          |   |          |          |          |   |          |          |          |   |          |         |         |   |          |         |         |   |          |         |         |   |          |         |         |   |          |         |         |   |          |          |         |   |          |          |          |   |          |          |         |   |          |          |         |   |          |          |         |                                                                                                                                                                                                                      |                                                                                                                                                                                                                                                                                                                                                                                                                                                                                                                                                                                                                                                                                                                                                                                                                                                                                                                                                                                                                                                                                                                                                                                                                                                                                                                                                                                                                                                                                                                                                                                                                                                                                                                                                                                                                                                                                                                                                                                                                                                                                                                                                                                                                                                                                                                                                                                                                                                                                                                                                                                                                                                                                                                                                                                                                                                                                                                                         |         |          |         |          |         |          |         |          |         |          |                                                                                                                                                                                                                        |                                                                                                                                                                                                                                                                                                                                                                                                                                                                                                                                                                                                                                                                                                                                                                                                                                                                                                                                                                                                                                                                                                                                                                                                                                                                                                                                                                                                                                                                                                                                                                                                                                                                                                                                                                                                                                                                                                                                                                                                                                                                                                                                                                                                                                                                                                                                                                                                                                                                                                                                                                                                                                                                                                                                                                                                                                                                                                                                                                                                                                                                                                                                                           |   |         |         |          |   |          |         |          |   |          |         |          |   |         |         |          |   |          |         |          |   |          |         |          |   |         |          |          |   |         |         |          |   |         |         |         |   |          |         |          |   |         |          |         |   |         |          |         |   |         |         |         |   |          |          |         |   |          |          |         |   |         |         |         |   |         |         |         |   |          |          |          |   |         |          |          |   |         |          |          |   |          |          |          |   |          |          |          |   |          |          |          |   |          |          |          |   |          |          |          |   |          |          |          |   |          |          |          |   |          |          |          |   |          |          |          |   |          |          |          |   |          |          |         |   |          |          |          |   |          |          |         |   |          |          |         |   |          |          |         |   |          |          |         |   |          |          |         |   |          |          |          |   |          |          |         |   |          |         |         |   |          |         |         |   |          |         |          |   |          |         |         |
| H                                                                                                                                                                                                                      | -1.16947                                                                                                                                                                                                                                                                                                                                                                                                                                                                                                                                                                                                                                                                                                                                                                                                                                                                                                                                                                                                                                                                                                                                                                                                                                                                                                                                                                                                                                                                                                                                                                                                                                                                                                                                                                                                                                                                                                                                                                                                                                                                                                                                                                                                                                                                                                                                                                                                                                                                                                                                                                                                                                                                                                                                                                                                                                                                                                                                                                                                                                                                                                                                           | -1.46759 | -3.30356 |         |          |   |         |         |          |   |         |         |         |   |         |          |          |   |         |         |          |   |         |         |          |   |         |          |          |   |         |         |          |   |         |         |         |   |         |          |          |   |         |         |         |   |         |         |         |   |         |         |         |   |          |         |         |   |          |         |         |   |         |         |         |   |         |         |         |   |          |          |         |   |         |          |         |   |         |         |         |   |         |          |          |   |         |          |          |   |         |          |          |   |         |          |          |   |         |          |          |   |         |          |          |   |          |          |          |   |          |          |          |   |          |          |          |   |          |          |          |   |          |         |         |   |          |         |         |   |          |         |         |   |          |         |         |   |          |         |         |   |          |          |         |   |          |          |          |   |          |          |         |   |          |          |         |   |          |          |         |                                                                                                                                                                                                                      |                                                                                                                                                                                                                                                                                                                                                                                                                                                                                                                                                                                                                                                                                                                                                                                                                                                                                                                                                                                                                                                                                                                                                                                                                                                                                                                                                                                                                                                                                                                                                                                                                                                                                                                                                                                                                                                                                                                                                                                                                                                                                                                                                                                                                                                                                                                                                                                                                                                                                                                                                                                                                                                                                                                                                                                                                                                                                                                                         |         |          |         |          |         |          |         |          |         |          |                                                                                                                                                                                                                        |                                                                                                                                                                                                                                                                                                                                                                                                                                                                                                                                                                                                                                                                                                                                                                                                                                                                                                                                                                                                                                                                                                                                                                                                                                                                                                                                                                                                                                                                                                                                                                                                                                                                                                                                                                                                                                                                                                                                                                                                                                                                                                                                                                                                                                                                                                                                                                                                                                                                                                                                                                                                                                                                                                                                                                                                                                                                                                                                                                                                                                                                                                                                                           |   |         |         |          |   |          |         |          |   |          |         |          |   |         |         |          |   |          |         |          |   |          |         |          |   |         |          |          |   |         |         |          |   |         |         |         |   |          |         |          |   |         |          |         |   |         |          |         |   |         |         |         |   |          |          |         |   |          |          |         |   |         |         |         |   |         |         |         |   |          |          |          |   |         |          |          |   |         |          |          |   |          |          |          |   |          |          |          |   |          |          |          |   |          |          |          |   |          |          |          |   |          |          |          |   |          |          |          |   |          |          |          |   |          |          |          |   |          |          |          |   |          |          |         |   |          |          |          |   |          |          |         |   |          |          |         |   |          |          |         |   |          |          |         |   |          |          |         |   |          |          |          |   |          |          |         |   |          |         |         |   |          |         |         |   |          |         |          |   |          |         |         |
| C                                                                                                                                                                                                                      | -1.93100                                                                                                                                                                                                                                                                                                                                                                                                                                                                                                                                                                                                                                                                                                                                                                                                                                                                                                                                                                                                                                                                                                                                                                                                                                                                                                                                                                                                                                                                                                                                                                                                                                                                                                                                                                                                                                                                                                                                                                                                                                                                                                                                                                                                                                                                                                                                                                                                                                                                                                                                                                                                                                                                                                                                                                                                                                                                                                                                                                                                                                                                                                                                           | 0.73734  | 1.47067  |         |          |   |         |         |          |   |         |         |         |   |         |          |          |   |         |         |          |   |         |         |          |   |         |          |          |   |         |         |          |   |         |         |         |   |         |          |          |   |         |         |         |   |         |         |         |   |         |         |         |   |          |         |         |   |          |         |         |   |         |         |         |   |         |         |         |   |          |          |         |   |         |          |         |   |         |         |         |   |         |          |          |   |         |          |          |   |         |          |          |   |         |          |          |   |         |          |          |   |         |          |          |   |          |          |          |   |          |          |          |   |          |          |          |   |          |          |          |   |          |         |         |   |          |         |         |   |          |         |         |   |          |         |         |   |          |         |         |   |          |          |         |   |          |          |          |   |          |          |         |   |          |          |         |   |          |          |         |                                                                                                                                                                                                                      |                                                                                                                                                                                                                                                                                                                                                                                                                                                                                                                                                                                                                                                                                                                                                                                                                                                                                                                                                                                                                                                                                                                                                                                                                                                                                                                                                                                                                                                                                                                                                                                                                                                                                                                                                                                                                                                                                                                                                                                                                                                                                                                                                                                                                                                                                                                                                                                                                                                                                                                                                                                                                                                                                                                                                                                                                                                                                                                                         |         |          |         |          |         |          |         |          |         |          |                                                                                                                                                                                                                        |                                                                                                                                                                                                                                                                                                                                                                                                                                                                                                                                                                                                                                                                                                                                                                                                                                                                                                                                                                                                                                                                                                                                                                                                                                                                                                                                                                                                                                                                                                                                                                                                                                                                                                                                                                                                                                                                                                                                                                                                                                                                                                                                                                                                                                                                                                                                                                                                                                                                                                                                                                                                                                                                                                                                                                                                                                                                                                                                                                                                                                                                                                                                                           |   |         |         |          |   |          |         |          |   |          |         |          |   |         |         |          |   |          |         |          |   |          |         |          |   |         |          |          |   |         |         |          |   |         |         |         |   |          |         |          |   |         |          |         |   |         |          |         |   |         |         |         |   |          |          |         |   |          |          |         |   |         |         |         |   |         |         |         |   |          |          |          |   |         |          |          |   |         |          |          |   |          |          |          |   |          |          |          |   |          |          |          |   |          |          |          |   |          |          |          |   |          |          |          |   |          |          |          |   |          |          |          |   |          |          |          |   |          |          |          |   |          |          |         |   |          |          |          |   |          |          |         |   |          |          |         |   |          |          |         |   |          |          |         |   |          |          |         |   |          |          |          |   |          |          |         |   |          |         |         |   |          |         |         |   |          |         |          |   |          |         |         |
| C                                                                                                                                                                                                                      | -3.12170                                                                                                                                                                                                                                                                                                                                                                                                                                                                                                                                                                                                                                                                                                                                                                                                                                                                                                                                                                                                                                                                                                                                                                                                                                                                                                                                                                                                                                                                                                                                                                                                                                                                                                                                                                                                                                                                                                                                                                                                                                                                                                                                                                                                                                                                                                                                                                                                                                                                                                                                                                                                                                                                                                                                                                                                                                                                                                                                                                                                                                                                                                                                           | 0.96921  | 2.41744  |         |          |   |         |         |          |   |         |         |         |   |         |          |          |   |         |         |          |   |         |         |          |   |         |          |          |   |         |         |          |   |         |         |         |   |         |          |          |   |         |         |         |   |         |         |         |   |         |         |         |   |          |         |         |   |          |         |         |   |         |         |         |   |         |         |         |   |          |          |         |   |         |          |         |   |         |         |         |   |         |          |          |   |         |          |          |   |         |          |          |   |         |          |          |   |         |          |          |   |         |          |          |   |          |          |          |   |          |          |          |   |          |          |          |   |          |          |          |   |          |         |         |   |          |         |         |   |          |         |         |   |          |         |         |   |          |         |         |   |          |          |         |   |          |          |          |   |          |          |         |   |          |          |         |   |          |          |         |                                                                                                                                                                                                                      |                                                                                                                                                                                                                                                                                                                                                                                                                                                                                                                                                                                                                                                                                                                                                                                                                                                                                                                                                                                                                                                                                                                                                                                                                                                                                                                                                                                                                                                                                                                                                                                                                                                                                                                                                                                                                                                                                                                                                                                                                                                                                                                                                                                                                                                                                                                                                                                                                                                                                                                                                                                                                                                                                                                                                                                                                                                                                                                                         |         |          |         |          |         |          |         |          |         |          |                                                                                                                                                                                                                        |                                                                                                                                                                                                                                                                                                                                                                                                                                                                                                                                                                                                                                                                                                                                                                                                                                                                                                                                                                                                                                                                                                                                                                                                                                                                                                                                                                                                                                                                                                                                                                                                                                                                                                                                                                                                                                                                                                                                                                                                                                                                                                                                                                                                                                                                                                                                                                                                                                                                                                                                                                                                                                                                                                                                                                                                                                                                                                                                                                                                                                                                                                                                                           |   |         |         |          |   |          |         |          |   |          |         |          |   |         |         |          |   |          |         |          |   |          |         |          |   |         |          |          |   |         |         |          |   |         |         |         |   |          |         |          |   |         |          |         |   |         |          |         |   |         |         |         |   |          |          |         |   |          |          |         |   |         |         |         |   |         |         |         |   |          |          |          |   |         |          |          |   |         |          |          |   |          |          |          |   |          |          |          |   |          |          |          |   |          |          |          |   |          |          |          |   |          |          |          |   |          |          |          |   |          |          |          |   |          |          |          |   |          |          |          |   |          |          |         |   |          |          |          |   |          |          |         |   |          |          |         |   |          |          |         |   |          |          |         |   |          |          |         |   |          |          |          |   |          |          |         |   |          |         |         |   |          |         |         |   |          |         |          |   |          |         |         |
| H                                                                                                                                                                                                                      | -3.33801                                                                                                                                                                                                                                                                                                                                                                                                                                                                                                                                                                                                                                                                                                                                                                                                                                                                                                                                                                                                                                                                                                                                                                                                                                                                                                                                                                                                                                                                                                                                                                                                                                                                                                                                                                                                                                                                                                                                                                                                                                                                                                                                                                                                                                                                                                                                                                                                                                                                                                                                                                                                                                                                                                                                                                                                                                                                                                                                                                                                                                                                                                                                           | 0.08708  | 3.02300  |         |          |   |         |         |          |   |         |         |         |   |         |          |          |   |         |         |          |   |         |         |          |   |         |          |          |   |         |         |          |   |         |         |         |   |         |          |          |   |         |         |         |   |         |         |         |   |         |         |         |   |          |         |         |   |          |         |         |   |         |         |         |   |         |         |         |   |          |          |         |   |         |          |         |   |         |         |         |   |         |          |          |   |         |          |          |   |         |          |          |   |         |          |          |   |         |          |          |   |         |          |          |   |          |          |          |   |          |          |          |   |          |          |          |   |          |          |          |   |          |         |         |   |          |         |         |   |          |         |         |   |          |         |         |   |          |         |         |   |          |          |         |   |          |          |          |   |          |          |         |   |          |          |         |   |          |          |         |                                                                                                                                                                                                                      |                                                                                                                                                                                                                                                                                                                                                                                                                                                                                                                                                                                                                                                                                                                                                                                                                                                                                                                                                                                                                                                                                                                                                                                                                                                                                                                                                                                                                                                                                                                                                                                                                                                                                                                                                                                                                                                                                                                                                                                                                                                                                                                                                                                                                                                                                                                                                                                                                                                                                                                                                                                                                                                                                                                                                                                                                                                                                                                                         |         |          |         |          |         |          |         |          |         |          |                                                                                                                                                                                                                        |                                                                                                                                                                                                                                                                                                                                                                                                                                                                                                                                                                                                                                                                                                                                                                                                                                                                                                                                                                                                                                                                                                                                                                                                                                                                                                                                                                                                                                                                                                                                                                                                                                                                                                                                                                                                                                                                                                                                                                                                                                                                                                                                                                                                                                                                                                                                                                                                                                                                                                                                                                                                                                                                                                                                                                                                                                                                                                                                                                                                                                                                                                                                                           |   |         |         |          |   |          |         |          |   |          |         |          |   |         |         |          |   |          |         |          |   |          |         |          |   |         |          |          |   |         |         |          |   |         |         |         |   |          |         |          |   |         |          |         |   |         |          |         |   |         |         |         |   |          |          |         |   |          |          |         |   |         |         |         |   |         |         |         |   |          |          |          |   |         |          |          |   |         |          |          |   |          |          |          |   |          |          |          |   |          |          |          |   |          |          |          |   |          |          |          |   |          |          |          |   |          |          |          |   |          |          |          |   |          |          |          |   |          |          |          |   |          |          |         |   |          |          |          |   |          |          |         |   |          |          |         |   |          |          |         |   |          |          |         |   |          |          |         |   |          |          |          |   |          |          |         |   |          |         |         |   |          |         |         |   |          |         |          |   |          |         |         |
| H                                                                                                                                                                                                                      | -4.00580                                                                                                                                                                                                                                                                                                                                                                                                                                                                                                                                                                                                                                                                                                                                                                                                                                                                                                                                                                                                                                                                                                                                                                                                                                                                                                                                                                                                                                                                                                                                                                                                                                                                                                                                                                                                                                                                                                                                                                                                                                                                                                                                                                                                                                                                                                                                                                                                                                                                                                                                                                                                                                                                                                                                                                                                                                                                                                                                                                                                                                                                                                                                           | 1.18484  | 1.81537  |         |          |   |         |         |          |   |         |         |         |   |         |          |          |   |         |         |          |   |         |         |          |   |         |          |          |   |         |         |          |   |         |         |         |   |         |          |          |   |         |         |         |   |         |         |         |   |         |         |         |   |          |         |         |   |          |         |         |   |         |         |         |   |         |         |         |   |          |          |         |   |         |          |         |   |         |         |         |   |         |          |          |   |         |          |          |   |         |          |          |   |         |          |          |   |         |          |          |   |         |          |          |   |          |          |          |   |          |          |          |   |          |          |          |   |          |          |          |   |          |         |         |   |          |         |         |   |          |         |         |   |          |         |         |   |          |         |         |   |          |          |         |   |          |          |          |   |          |          |         |   |          |          |         |   |          |          |         |                                                                                                                                                                                                                      |                                                                                                                                                                                                                                                                                                                                                                                                                                                                                                                                                                                                                                                                                                                                                                                                                                                                                                                                                                                                                                                                                                                                                                                                                                                                                                                                                                                                                                                                                                                                                                                                                                                                                                                                                                                                                                                                                                                                                                                                                                                                                                                                                                                                                                                                                                                                                                                                                                                                                                                                                                                                                                                                                                                                                                                                                                                                                                                                         |         |          |         |          |         |          |         |          |         |          |                                                                                                                                                                                                                        |                                                                                                                                                                                                                                                                                                                                                                                                                                                                                                                                                                                                                                                                                                                                                                                                                                                                                                                                                                                                                                                                                                                                                                                                                                                                                                                                                                                                                                                                                                                                                                                                                                                                                                                                                                                                                                                                                                                                                                                                                                                                                                                                                                                                                                                                                                                                                                                                                                                                                                                                                                                                                                                                                                                                                                                                                                                                                                                                                                                                                                                                                                                                                           |   |         |         |          |   |          |         |          |   |          |         |          |   |         |         |          |   |          |         |          |   |          |         |          |   |         |          |          |   |         |         |          |   |         |         |         |   |          |         |          |   |         |          |         |   |         |          |         |   |         |         |         |   |          |          |         |   |          |          |         |   |         |         |         |   |         |         |         |   |          |          |          |   |         |          |          |   |         |          |          |   |          |          |          |   |          |          |          |   |          |          |          |   |          |          |          |   |          |          |          |   |          |          |          |   |          |          |          |   |          |          |          |   |          |          |          |   |          |          |          |   |          |          |         |   |          |          |          |   |          |          |         |   |          |          |         |   |          |          |         |   |          |          |         |   |          |          |         |   |          |          |          |   |          |          |         |   |          |         |         |   |          |         |         |   |          |         |          |   |          |         |         |
| H                                                                                                                                                                                                                      | -2.94770                                                                                                                                                                                                                                                                                                                                                                                                                                                                                                                                                                                                                                                                                                                                                                                                                                                                                                                                                                                                                                                                                                                                                                                                                                                                                                                                                                                                                                                                                                                                                                                                                                                                                                                                                                                                                                                                                                                                                                                                                                                                                                                                                                                                                                                                                                                                                                                                                                                                                                                                                                                                                                                                                                                                                                                                                                                                                                                                                                                                                                                                                                                                           | 1.81635  | 3.08383  |         |          |   |         |         |          |   |         |         |         |   |         |          |          |   |         |         |          |   |         |         |          |   |         |          |          |   |         |         |          |   |         |         |         |   |         |          |          |   |         |         |         |   |         |         |         |   |         |         |         |   |          |         |         |   |          |         |         |   |         |         |         |   |         |         |         |   |          |          |         |   |         |          |         |   |         |         |         |   |         |          |          |   |         |          |          |   |         |          |          |   |         |          |          |   |         |          |          |   |         |          |          |   |          |          |          |   |          |          |          |   |          |          |          |   |          |          |          |   |          |         |         |   |          |         |         |   |          |         |         |   |          |         |         |   |          |         |         |   |          |          |         |   |          |          |          |   |          |          |         |   |          |          |         |   |          |          |         |                                                                                                                                                                                                                      |                                                                                                                                                                                                                                                                                                                                                                                                                                                                                                                                                                                                                                                                                                                                                                                                                                                                                                                                                                                                                                                                                                                                                                                                                                                                                                                                                                                                                                                                                                                                                                                                                                                                                                                                                                                                                                                                                                                                                                                                                                                                                                                                                                                                                                                                                                                                                                                                                                                                                                                                                                                                                                                                                                                                                                                                                                                                                                                                         |         |          |         |          |         |          |         |          |         |          |                                                                                                                                                                                                                        |                                                                                                                                                                                                                                                                                                                                                                                                                                                                                                                                                                                                                                                                                                                                                                                                                                                                                                                                                                                                                                                                                                                                                                                                                                                                                                                                                                                                                                                                                                                                                                                                                                                                                                                                                                                                                                                                                                                                                                                                                                                                                                                                                                                                                                                                                                                                                                                                                                                                                                                                                                                                                                                                                                                                                                                                                                                                                                                                                                                                                                                                                                                                                           |   |         |         |          |   |          |         |          |   |          |         |          |   |         |         |          |   |          |         |          |   |          |         |          |   |         |          |          |   |         |         |          |   |         |         |         |   |          |         |          |   |         |          |         |   |         |          |         |   |         |         |         |   |          |          |         |   |          |          |         |   |         |         |         |   |         |         |         |   |          |          |          |   |         |          |          |   |         |          |          |   |          |          |          |   |          |          |          |   |          |          |          |   |          |          |          |   |          |          |          |   |          |          |          |   |          |          |          |   |          |          |          |   |          |          |          |   |          |          |          |   |          |          |         |   |          |          |          |   |          |          |         |   |          |          |         |   |          |          |         |   |          |          |         |   |          |          |         |   |          |          |          |   |          |          |         |   |          |         |         |   |          |         |         |   |          |         |          |   |          |         |         |
| C                                                                                                                                                                                                                      | -2.29354                                                                                                                                                                                                                                                                                                                                                                                                                                                                                                                                                                                                                                                                                                                                                                                                                                                                                                                                                                                                                                                                                                                                                                                                                                                                                                                                                                                                                                                                                                                                                                                                                                                                                                                                                                                                                                                                                                                                                                                                                                                                                                                                                                                                                                                                                                                                                                                                                                                                                                                                                                                                                                                                                                                                                                                                                                                                                                                                                                                                                                                                                                                                           | -0.47732 | 0.59439  |         |          |   |         |         |          |   |         |         |         |   |         |          |          |   |         |         |          |   |         |         |          |   |         |          |          |   |         |         |          |   |         |         |         |   |         |          |          |   |         |         |         |   |         |         |         |   |         |         |         |   |          |         |         |   |          |         |         |   |         |         |         |   |         |         |         |   |          |          |         |   |         |          |         |   |         |         |         |   |         |          |          |   |         |          |          |   |         |          |          |   |         |          |          |   |         |          |          |   |         |          |          |   |          |          |          |   |          |          |          |   |          |          |          |   |          |          |          |   |          |         |         |   |          |         |         |   |          |         |         |   |          |         |         |   |          |         |         |   |          |          |         |   |          |          |          |   |          |          |         |   |          |          |         |   |          |          |         |                                                                                                                                                                                                                      |                                                                                                                                                                                                                                                                                                                                                                                                                                                                                                                                                                                                                                                                                                                                                                                                                                                                                                                                                                                                                                                                                                                                                                                                                                                                                                                                                                                                                                                                                                                                                                                                                                                                                                                                                                                                                                                                                                                                                                                                                                                                                                                                                                                                                                                                                                                                                                                                                                                                                                                                                                                                                                                                                                                                                                                                                                                                                                                                         |         |          |         |          |         |          |         |          |         |          |                                                                                                                                                                                                                        |                                                                                                                                                                                                                                                                                                                                                                                                                                                                                                                                                                                                                                                                                                                                                                                                                                                                                                                                                                                                                                                                                                                                                                                                                                                                                                                                                                                                                                                                                                                                                                                                                                                                                                                                                                                                                                                                                                                                                                                                                                                                                                                                                                                                                                                                                                                                                                                                                                                                                                                                                                                                                                                                                                                                                                                                                                                                                                                                                                                                                                                                                                                                                           |   |         |         |          |   |          |         |          |   |          |         |          |   |         |         |          |   |          |         |          |   |          |         |          |   |         |          |          |   |         |         |          |   |         |         |         |   |          |         |          |   |         |          |         |   |         |          |         |   |         |         |         |   |          |          |         |   |          |          |         |   |         |         |         |   |         |         |         |   |          |          |          |   |         |          |          |   |         |          |          |   |          |          |          |   |          |          |          |   |          |          |          |   |          |          |          |   |          |          |          |   |          |          |          |   |          |          |          |   |          |          |          |   |          |          |          |   |          |          |          |   |          |          |         |   |          |          |          |   |          |          |         |   |          |          |         |   |          |          |         |   |          |          |         |   |          |          |         |   |          |          |          |   |          |          |         |   |          |         |         |   |          |         |         |   |          |         |          |   |          |         |         |
| H                                                                                                                                                                                                                      | -1.57531                                                                                                                                                                                                                                                                                                                                                                                                                                                                                                                                                                                                                                                                                                                                                                                                                                                                                                                                                                                                                                                                                                                                                                                                                                                                                                                                                                                                                                                                                                                                                                                                                                                                                                                                                                                                                                                                                                                                                                                                                                                                                                                                                                                                                                                                                                                                                                                                                                                                                                                                                                                                                                                                                                                                                                                                                                                                                                                                                                                                                                                                                                                                           | -0.62466 | -0.20676 |         |          |   |         |         |          |   |         |         |         |   |         |          |          |   |         |         |          |   |         |         |          |   |         |          |          |   |         |         |          |   |         |         |         |   |         |          |          |   |         |         |         |   |         |         |         |   |         |         |         |   |          |         |         |   |          |         |         |   |         |         |         |   |         |         |         |   |          |          |         |   |         |          |         |   |         |         |         |   |         |          |          |   |         |          |          |   |         |          |          |   |         |          |          |   |         |          |          |   |         |          |          |   |          |          |          |   |          |          |          |   |          |          |          |   |          |          |          |   |          |         |         |   |          |         |         |   |          |         |         |   |          |         |         |   |          |         |         |   |          |          |         |   |          |          |          |   |          |          |         |   |          |          |         |   |          |          |         |                                                                                                                                                                                                                      |                                                                                                                                                                                                                                                                                                                                                                                                                                                                                                                                                                                                                                                                                                                                                                                                                                                                                                                                                                                                                                                                                                                                                                                                                                                                                                                                                                                                                                                                                                                                                                                                                                                                                                                                                                                                                                                                                                                                                                                                                                                                                                                                                                                                                                                                                                                                                                                                                                                                                                                                                                                                                                                                                                                                                                                                                                                                                                                                         |         |          |         |          |         |          |         |          |         |          |                                                                                                                                                                                                                        |                                                                                                                                                                                                                                                                                                                                                                                                                                                                                                                                                                                                                                                                                                                                                                                                                                                                                                                                                                                                                                                                                                                                                                                                                                                                                                                                                                                                                                                                                                                                                                                                                                                                                                                                                                                                                                                                                                                                                                                                                                                                                                                                                                                                                                                                                                                                                                                                                                                                                                                                                                                                                                                                                                                                                                                                                                                                                                                                                                                                                                                                                                                                                           |   |         |         |          |   |          |         |          |   |          |         |          |   |         |         |          |   |          |         |          |   |          |         |          |   |         |          |          |   |         |         |          |   |         |         |         |   |          |         |          |   |         |          |         |   |         |          |         |   |         |         |         |   |          |          |         |   |          |          |         |   |         |         |         |   |         |         |         |   |          |          |          |   |         |          |          |   |         |          |          |   |          |          |          |   |          |          |          |   |          |          |          |   |          |          |          |   |          |          |          |   |          |          |          |   |          |          |          |   |          |          |          |   |          |          |          |   |          |          |          |   |          |          |         |   |          |          |          |   |          |          |         |   |          |          |         |   |          |          |         |   |          |          |         |   |          |          |         |   |          |          |          |   |          |          |         |   |          |         |         |   |          |         |         |   |          |         |          |   |          |         |         |
| H                                                                                                                                                                                                                      | -3.27569                                                                                                                                                                                                                                                                                                                                                                                                                                                                                                                                                                                                                                                                                                                                                                                                                                                                                                                                                                                                                                                                                                                                                                                                                                                                                                                                                                                                                                                                                                                                                                                                                                                                                                                                                                                                                                                                                                                                                                                                                                                                                                                                                                                                                                                                                                                                                                                                                                                                                                                                                                                                                                                                                                                                                                                                                                                                                                                                                                                                                                                                                                                                           | -0.31604 | 0.14207  |         |          |   |         |         |          |   |         |         |         |   |         |          |          |   |         |         |          |   |         |         |          |   |         |          |          |   |         |         |          |   |         |         |         |   |         |          |          |   |         |         |         |   |         |         |         |   |         |         |         |   |          |         |         |   |          |         |         |   |         |         |         |   |         |         |         |   |          |          |         |   |         |          |         |   |         |         |         |   |         |          |          |   |         |          |          |   |         |          |          |   |         |          |          |   |         |          |          |   |         |          |          |   |          |          |          |   |          |          |          |   |          |          |          |   |          |          |          |   |          |         |         |   |          |         |         |   |          |         |         |   |          |         |         |   |          |         |         |   |          |          |         |   |          |          |          |   |          |          |         |   |          |          |         |   |          |          |         |                                                                                                                                                                                                                      |                                                                                                                                                                                                                                                                                                                                                                                                                                                                                                                                                                                                                                                                                                                                                                                                                                                                                                                                                                                                                                                                                                                                                                                                                                                                                                                                                                                                                                                                                                                                                                                                                                                                                                                                                                                                                                                                                                                                                                                                                                                                                                                                                                                                                                                                                                                                                                                                                                                                                                                                                                                                                                                                                                                                                                                                                                                                                                                                         |         |          |         |          |         |          |         |          |         |          |                                                                                                                                                                                                                        |                                                                                                                                                                                                                                                                                                                                                                                                                                                                                                                                                                                                                                                                                                                                                                                                                                                                                                                                                                                                                                                                                                                                                                                                                                                                                                                                                                                                                                                                                                                                                                                                                                                                                                                                                                                                                                                                                                                                                                                                                                                                                                                                                                                                                                                                                                                                                                                                                                                                                                                                                                                                                                                                                                                                                                                                                                                                                                                                                                                                                                                                                                                                                           |   |         |         |          |   |          |         |          |   |          |         |          |   |         |         |          |   |          |         |          |   |          |         |          |   |         |          |          |   |         |         |          |   |         |         |         |   |          |         |          |   |         |          |         |   |         |          |         |   |         |         |         |   |          |          |         |   |          |          |         |   |         |         |         |   |         |         |         |   |          |          |          |   |         |          |          |   |         |          |          |   |          |          |          |   |          |          |          |   |          |          |          |   |          |          |          |   |          |          |          |   |          |          |          |   |          |          |          |   |          |          |          |   |          |          |          |   |          |          |          |   |          |          |         |   |          |          |          |   |          |          |         |   |          |          |         |   |          |          |         |   |          |          |         |   |          |          |         |   |          |          |          |   |          |          |         |   |          |         |         |   |          |         |         |   |          |         |          |   |          |         |         |
| H                                                                                                                                                                                                                      | -2.33928                                                                                                                                                                                                                                                                                                                                                                                                                                                                                                                                                                                                                                                                                                                                                                                                                                                                                                                                                                                                                                                                                                                                                                                                                                                                                                                                                                                                                                                                                                                                                                                                                                                                                                                                                                                                                                                                                                                                                                                                                                                                                                                                                                                                                                                                                                                                                                                                                                                                                                                                                                                                                                                                                                                                                                                                                                                                                                                                                                                                                                                                                                                                           | -1.38642 | 1.19837  |         |          |   |         |         |          |   |         |         |         |   |         |          |          |   |         |         |          |   |         |         |          |   |         |          |          |   |         |         |          |   |         |         |         |   |         |          |          |   |         |         |         |   |         |         |         |   |         |         |         |   |          |         |         |   |          |         |         |   |         |         |         |   |         |         |         |   |          |          |         |   |         |          |         |   |         |         |         |   |         |          |          |   |         |          |          |   |         |          |          |   |         |          |          |   |         |          |          |   |         |          |          |   |          |          |          |   |          |          |          |   |          |          |          |   |          |          |          |   |          |         |         |   |          |         |         |   |          |         |         |   |          |         |         |   |          |         |         |   |          |          |         |   |          |          |          |   |          |          |         |   |          |          |         |   |          |          |         |                                                                                                                                                                                                                      |                                                                                                                                                                                                                                                                                                                                                                                                                                                                                                                                                                                                                                                                                                                                                                                                                                                                                                                                                                                                                                                                                                                                                                                                                                                                                                                                                                                                                                                                                                                                                                                                                                                                                                                                                                                                                                                                                                                                                                                                                                                                                                                                                                                                                                                                                                                                                                                                                                                                                                                                                                                                                                                                                                                                                                                                                                                                                                                                         |         |          |         |          |         |          |         |          |         |          |                                                                                                                                                                                                                        |                                                                                                                                                                                                                                                                                                                                                                                                                                                                                                                                                                                                                                                                                                                                                                                                                                                                                                                                                                                                                                                                                                                                                                                                                                                                                                                                                                                                                                                                                                                                                                                                                                                                                                                                                                                                                                                                                                                                                                                                                                                                                                                                                                                                                                                                                                                                                                                                                                                                                                                                                                                                                                                                                                                                                                                                                                                                                                                                                                                                                                                                                                                                                           |   |         |         |          |   |          |         |          |   |          |         |          |   |         |         |          |   |          |         |          |   |          |         |          |   |         |          |          |   |         |         |          |   |         |         |         |   |          |         |          |   |         |          |         |   |         |          |         |   |         |         |         |   |          |          |         |   |          |          |         |   |         |         |         |   |         |         |         |   |          |          |          |   |         |          |          |   |         |          |          |   |          |          |          |   |          |          |          |   |          |          |          |   |          |          |          |   |          |          |          |   |          |          |          |   |          |          |          |   |          |          |          |   |          |          |          |   |          |          |          |   |          |          |         |   |          |          |          |   |          |          |         |   |          |          |         |   |          |          |         |   |          |          |         |   |          |          |         |   |          |          |          |   |          |          |         |   |          |         |         |   |          |         |         |   |          |         |          |   |          |         |         |
| C                                                                                                                                                                                                                      | -1.82669                                                                                                                                                                                                                                                                                                                                                                                                                                                                                                                                                                                                                                                                                                                                                                                                                                                                                                                                                                                                                                                                                                                                                                                                                                                                                                                                                                                                                                                                                                                                                                                                                                                                                                                                                                                                                                                                                                                                                                                                                                                                                                                                                                                                                                                                                                                                                                                                                                                                                                                                                                                                                                                                                                                                                                                                                                                                                                                                                                                                                                                                                                                                           | 1.99095  | 0.58119  |         |          |   |         |         |          |   |         |         |         |   |         |          |          |   |         |         |          |   |         |         |          |   |         |          |          |   |         |         |          |   |         |         |         |   |         |          |          |   |         |         |         |   |         |         |         |   |         |         |         |   |          |         |         |   |          |         |         |   |         |         |         |   |         |         |         |   |          |          |         |   |         |          |         |   |         |         |         |   |         |          |          |   |         |          |          |   |         |          |          |   |         |          |          |   |         |          |          |   |         |          |          |   |          |          |          |   |          |          |          |   |          |          |          |   |          |          |          |   |          |         |         |   |          |         |         |   |          |         |         |   |          |         |         |   |          |         |         |   |          |          |         |   |          |          |          |   |          |          |         |   |          |          |         |   |          |          |         |                                                                                                                                                                                                                      |                                                                                                                                                                                                                                                                                                                                                                                                                                                                                                                                                                                                                                                                                                                                                                                                                                                                                                                                                                                                                                                                                                                                                                                                                                                                                                                                                                                                                                                                                                                                                                                                                                                                                                                                                                                                                                                                                                                                                                                                                                                                                                                                                                                                                                                                                                                                                                                                                                                                                                                                                                                                                                                                                                                                                                                                                                                                                                                                         |         |          |         |          |         |          |         |          |         |          |                                                                                                                                                                                                                        |                                                                                                                                                                                                                                                                                                                                                                                                                                                                                                                                                                                                                                                                                                                                                                                                                                                                                                                                                                                                                                                                                                                                                                                                                                                                                                                                                                                                                                                                                                                                                                                                                                                                                                                                                                                                                                                                                                                                                                                                                                                                                                                                                                                                                                                                                                                                                                                                                                                                                                                                                                                                                                                                                                                                                                                                                                                                                                                                                                                                                                                                                                                                                           |   |         |         |          |   |          |         |          |   |          |         |          |   |         |         |          |   |          |         |          |   |          |         |          |   |         |          |          |   |         |         |          |   |         |         |         |   |          |         |          |   |         |          |         |   |         |          |         |   |         |         |         |   |          |          |         |   |          |          |         |   |         |         |         |   |         |         |         |   |          |          |          |   |         |          |          |   |         |          |          |   |          |          |          |   |          |          |          |   |          |          |          |   |          |          |          |   |          |          |          |   |          |          |          |   |          |          |          |   |          |          |          |   |          |          |          |   |          |          |          |   |          |          |         |   |          |          |          |   |          |          |         |   |          |          |         |   |          |          |         |   |          |          |         |   |          |          |         |   |          |          |          |   |          |          |         |   |          |         |         |   |          |         |         |   |          |         |          |   |          |         |         |
| H                                                                                                                                                                                                                      | -1.52775                                                                                                                                                                                                                                                                                                                                                                                                                                                                                                                                                                                                                                                                                                                                                                                                                                                                                                                                                                                                                                                                                                                                                                                                                                                                                                                                                                                                                                                                                                                                                                                                                                                                                                                                                                                                                                                                                                                                                                                                                                                                                                                                                                                                                                                                                                                                                                                                                                                                                                                                                                                                                                                                                                                                                                                                                                                                                                                                                                                                                                                                                                                                           | 2.85888  | 1.17334  |         |          |   |         |         |          |   |         |         |         |   |         |          |          |   |         |         |          |   |         |         |          |   |         |          |          |   |         |         |          |   |         |         |         |   |         |          |          |   |         |         |         |   |         |         |         |   |         |         |         |   |          |         |         |   |          |         |         |   |         |         |         |   |         |         |         |   |          |          |         |   |         |          |         |   |         |         |         |   |         |          |          |   |         |          |          |   |         |          |          |   |         |          |          |   |         |          |          |   |         |          |          |   |          |          |          |   |          |          |          |   |          |          |          |   |          |          |          |   |          |         |         |   |          |         |         |   |          |         |         |   |          |         |         |   |          |         |         |   |          |          |         |   |          |          |          |   |          |          |         |   |          |          |         |   |          |          |         |                                                                                                                                                                                                                      |                                                                                                                                                                                                                                                                                                                                                                                                                                                                                                                                                                                                                                                                                                                                                                                                                                                                                                                                                                                                                                                                                                                                                                                                                                                                                                                                                                                                                                                                                                                                                                                                                                                                                                                                                                                                                                                                                                                                                                                                                                                                                                                                                                                                                                                                                                                                                                                                                                                                                                                                                                                                                                                                                                                                                                                                                                                                                                                                         |         |          |         |          |         |          |         |          |         |          |                                                                                                                                                                                                                        |                                                                                                                                                                                                                                                                                                                                                                                                                                                                                                                                                                                                                                                                                                                                                                                                                                                                                                                                                                                                                                                                                                                                                                                                                                                                                                                                                                                                                                                                                                                                                                                                                                                                                                                                                                                                                                                                                                                                                                                                                                                                                                                                                                                                                                                                                                                                                                                                                                                                                                                                                                                                                                                                                                                                                                                                                                                                                                                                                                                                                                                                                                                                                           |   |         |         |          |   |          |         |          |   |          |         |          |   |         |         |          |   |          |         |          |   |          |         |          |   |         |          |          |   |         |         |          |   |         |         |         |   |          |         |          |   |         |          |         |   |         |          |         |   |         |         |         |   |          |          |         |   |          |          |         |   |         |         |         |   |         |         |         |   |          |          |          |   |         |          |          |   |         |          |          |   |          |          |          |   |          |          |          |   |          |          |          |   |          |          |          |   |          |          |          |   |          |          |          |   |          |          |          |   |          |          |          |   |          |          |          |   |          |          |          |   |          |          |         |   |          |          |          |   |          |          |         |   |          |          |         |   |          |          |         |   |          |          |         |   |          |          |         |   |          |          |          |   |          |          |         |   |          |         |         |   |          |         |         |   |          |         |          |   |          |         |         |
| H                                                                                                                                                                                                                      | -2.80500                                                                                                                                                                                                                                                                                                                                                                                                                                                                                                                                                                                                                                                                                                                                                                                                                                                                                                                                                                                                                                                                                                                                                                                                                                                                                                                                                                                                                                                                                                                                                                                                                                                                                                                                                                                                                                                                                                                                                                                                                                                                                                                                                                                                                                                                                                                                                                                                                                                                                                                                                                                                                                                                                                                                                                                                                                                                                                                                                                                                                                                                                                                                           | 2.19813  | 0.14013  |         |          |   |         |         |          |   |         |         |         |   |         |          |          |   |         |         |          |   |         |         |          |   |         |          |          |   |         |         |          |   |         |         |         |   |         |          |          |   |         |         |         |   |         |         |         |   |         |         |         |   |          |         |         |   |          |         |         |   |         |         |         |   |         |         |         |   |          |          |         |   |         |          |         |   |         |         |         |   |         |          |          |   |         |          |          |   |         |          |          |   |         |          |          |   |         |          |          |   |         |          |          |   |          |          |          |   |          |          |          |   |          |          |          |   |          |          |          |   |          |         |         |   |          |         |         |   |          |         |         |   |          |         |         |   |          |         |         |   |          |          |         |   |          |          |          |   |          |          |         |   |          |          |         |   |          |          |         |                                                                                                                                                                                                                      |                                                                                                                                                                                                                                                                                                                                                                                                                                                                                                                                                                                                                                                                                                                                                                                                                                                                                                                                                                                                                                                                                                                                                                                                                                                                                                                                                                                                                                                                                                                                                                                                                                                                                                                                                                                                                                                                                                                                                                                                                                                                                                                                                                                                                                                                                                                                                                                                                                                                                                                                                                                                                                                                                                                                                                                                                                                                                                                                         |         |          |         |          |         |          |         |          |         |          |                                                                                                                                                                                                                        |                                                                                                                                                                                                                                                                                                                                                                                                                                                                                                                                                                                                                                                                                                                                                                                                                                                                                                                                                                                                                                                                                                                                                                                                                                                                                                                                                                                                                                                                                                                                                                                                                                                                                                                                                                                                                                                                                                                                                                                                                                                                                                                                                                                                                                                                                                                                                                                                                                                                                                                                                                                                                                                                                                                                                                                                                                                                                                                                                                                                                                                                                                                                                           |   |         |         |          |   |          |         |          |   |          |         |          |   |         |         |          |   |          |         |          |   |          |         |          |   |         |          |          |   |         |         |          |   |         |         |         |   |          |         |          |   |         |          |         |   |         |          |         |   |         |         |         |   |          |          |         |   |          |          |         |   |         |         |         |   |         |         |         |   |          |          |          |   |         |          |          |   |         |          |          |   |          |          |          |   |          |          |          |   |          |          |          |   |          |          |          |   |          |          |          |   |          |          |          |   |          |          |          |   |          |          |          |   |          |          |          |   |          |          |          |   |          |          |         |   |          |          |          |   |          |          |         |   |          |          |         |   |          |          |         |   |          |          |         |   |          |          |         |   |          |          |          |   |          |          |         |   |          |         |         |   |          |         |         |   |          |         |          |   |          |         |         |
| H                                                                                                                                                                                                                      | -1.11433                                                                                                                                                                                                                                                                                                                                                                                                                                                                                                                                                                                                                                                                                                                                                                                                                                                                                                                                                                                                                                                                                                                                                                                                                                                                                                                                                                                                                                                                                                                                                                                                                                                                                                                                                                                                                                                                                                                                                                                                                                                                                                                                                                                                                                                                                                                                                                                                                                                                                                                                                                                                                                                                                                                                                                                                                                                                                                                                                                                                                                                                                                                                           | 1.86243  | -0.22823 |         |          |   |         |         |          |   |         |         |         |   |         |          |          |   |         |         |          |   |         |         |          |   |         |          |          |   |         |         |          |   |         |         |         |   |         |          |          |   |         |         |         |   |         |         |         |   |         |         |         |   |          |         |         |   |          |         |         |   |         |         |         |   |         |         |         |   |          |          |         |   |         |          |         |   |         |         |         |   |         |          |          |   |         |          |          |   |         |          |          |   |         |          |          |   |         |          |          |   |         |          |          |   |          |          |          |   |          |          |          |   |          |          |          |   |          |          |          |   |          |         |         |   |          |         |         |   |          |         |         |   |          |         |         |   |          |         |         |   |          |          |         |   |          |          |          |   |          |          |         |   |          |          |         |   |          |          |         |                                                                                                                                                                                                                      |                                                                                                                                                                                                                                                                                                                                                                                                                                                                                                                                                                                                                                                                                                                                                                                                                                                                                                                                                                                                                                                                                                                                                                                                                                                                                                                                                                                                                                                                                                                                                                                                                                                                                                                                                                                                                                                                                                                                                                                                                                                                                                                                                                                                                                                                                                                                                                                                                                                                                                                                                                                                                                                                                                                                                                                                                                                                                                                                         |         |          |         |          |         |          |         |          |         |          |                                                                                                                                                                                                                        |                                                                                                                                                                                                                                                                                                                                                                                                                                                                                                                                                                                                                                                                                                                                                                                                                                                                                                                                                                                                                                                                                                                                                                                                                                                                                                                                                                                                                                                                                                                                                                                                                                                                                                                                                                                                                                                                                                                                                                                                                                                                                                                                                                                                                                                                                                                                                                                                                                                                                                                                                                                                                                                                                                                                                                                                                                                                                                                                                                                                                                                                                                                                                           |   |         |         |          |   |          |         |          |   |          |         |          |   |         |         |          |   |          |         |          |   |          |         |          |   |         |          |          |   |         |         |          |   |         |         |         |   |          |         |          |   |         |          |         |   |         |          |         |   |         |         |         |   |          |          |         |   |          |          |         |   |         |         |         |   |         |         |         |   |          |          |          |   |         |          |          |   |         |          |          |   |          |          |          |   |          |          |          |   |          |          |          |   |          |          |          |   |          |          |          |   |          |          |          |   |          |          |          |   |          |          |          |   |          |          |          |   |          |          |          |   |          |          |         |   |          |          |          |   |          |          |         |   |          |          |         |   |          |          |         |   |          |          |         |   |          |          |         |   |          |          |          |   |          |          |         |   |          |         |         |   |          |         |         |   |          |         |          |   |          |         |         |
| H                                                                                                                                                                                                                      | 2.14217                                                                                                                                                                                                                                                                                                                                                                                                                                                                                                                                                                                                                                                                                                                                                                                                                                                                                                                                                                                                                                                                                                                                                                                                                                                                                                                                                                                                                                                                                                                                                                                                                                                                                                                                                                                                                                                                                                                                                                                                                                                                                                                                                                                                                                                                                                                                                                                                                                                                                                                                                                                                                                                                                                                                                                                                                                                                                                                                                                                                                                                                                                                                            | 0.03088  | -4.01763 |         |          |   |         |         |          |   |         |         |         |   |         |          |          |   |         |         |          |   |         |         |          |   |         |          |          |   |         |         |          |   |         |         |         |   |         |          |          |   |         |         |         |   |         |         |         |   |         |         |         |   |          |         |         |   |          |         |         |   |         |         |         |   |         |         |         |   |          |          |         |   |         |          |         |   |         |         |         |   |         |          |          |   |         |          |          |   |         |          |          |   |         |          |          |   |         |          |          |   |         |          |          |   |          |          |          |   |          |          |          |   |          |          |          |   |          |          |          |   |          |         |         |   |          |         |         |   |          |         |         |   |          |         |         |   |          |         |         |   |          |          |         |   |          |          |          |   |          |          |         |   |          |          |         |   |          |          |         |                                                                                                                                                                                                                      |                                                                                                                                                                                                                                                                                                                                                                                                                                                                                                                                                                                                                                                                                                                                                                                                                                                                                                                                                                                                                                                                                                                                                                                                                                                                                                                                                                                                                                                                                                                                                                                                                                                                                                                                                                                                                                                                                                                                                                                                                                                                                                                                                                                                                                                                                                                                                                                                                                                                                                                                                                                                                                                                                                                                                                                                                                                                                                                                         |         |          |         |          |         |          |         |          |         |          |                                                                                                                                                                                                                        |                                                                                                                                                                                                                                                                                                                                                                                                                                                                                                                                                                                                                                                                                                                                                                                                                                                                                                                                                                                                                                                                                                                                                                                                                                                                                                                                                                                                                                                                                                                                                                                                                                                                                                                                                                                                                                                                                                                                                                                                                                                                                                                                                                                                                                                                                                                                                                                                                                                                                                                                                                                                                                                                                                                                                                                                                                                                                                                                                                                                                                                                                                                                                           |   |         |         |          |   |          |         |          |   |          |         |          |   |         |         |          |   |          |         |          |   |          |         |          |   |         |          |          |   |         |         |          |   |         |         |         |   |          |         |          |   |         |          |         |   |         |          |         |   |         |         |         |   |          |          |         |   |          |          |         |   |         |         |         |   |         |         |         |   |          |          |          |   |         |          |          |   |         |          |          |   |          |          |          |   |          |          |          |   |          |          |          |   |          |          |          |   |          |          |          |   |          |          |          |   |          |          |          |   |          |          |          |   |          |          |          |   |          |          |          |   |          |          |         |   |          |          |          |   |          |          |         |   |          |          |         |   |          |          |         |   |          |          |         |   |          |          |         |   |          |          |          |   |          |          |         |   |          |         |         |   |          |         |         |   |          |         |          |   |          |         |         |
| C                                                                                                                                                                                                                      | 1.87377                                                                                                                                                                                                                                                                                                                                                                                                                                                                                                                                                                                                                                                                                                                                                                                                                                                                                                                                                                                                                                                                                                                                                                                                                                                                                                                                                                                                                                                                                                                                                                                                                                                                                                                                                                                                                                                                                                                                                                                                                                                                                                                                                                                                                                                                                                                                                                                                                                                                                                                                                                                                                                                                                                                                                                                                                                                                                                                                                                                                                                                                                                                                            | 0.02521  | -2.96825 |         |          |   |         |         |          |   |         |         |         |   |         |          |          |   |         |         |          |   |         |         |          |   |         |          |          |   |         |         |          |   |         |         |         |   |         |          |          |   |         |         |         |   |         |         |         |   |         |         |         |   |          |         |         |   |          |         |         |   |         |         |         |   |         |         |         |   |          |          |         |   |         |          |         |   |         |         |         |   |         |          |          |   |         |          |          |   |         |          |          |   |         |          |          |   |         |          |          |   |         |          |          |   |          |          |          |   |          |          |          |   |          |          |          |   |          |          |          |   |          |         |         |   |          |         |         |   |          |         |         |   |          |         |         |   |          |         |         |   |          |          |         |   |          |          |          |   |          |          |         |   |          |          |         |   |          |          |         |                                                                                                                                                                                                                      |                                                                                                                                                                                                                                                                                                                                                                                                                                                                                                                                                                                                                                                                                                                                                                                                                                                                                                                                                                                                                                                                                                                                                                                                                                                                                                                                                                                                                                                                                                                                                                                                                                                                                                                                                                                                                                                                                                                                                                                                                                                                                                                                                                                                                                                                                                                                                                                                                                                                                                                                                                                                                                                                                                                                                                                                                                                                                                                                         |         |          |         |          |         |          |         |          |         |          |                                                                                                                                                                                                                        |                                                                                                                                                                                                                                                                                                                                                                                                                                                                                                                                                                                                                                                                                                                                                                                                                                                                                                                                                                                                                                                                                                                                                                                                                                                                                                                                                                                                                                                                                                                                                                                                                                                                                                                                                                                                                                                                                                                                                                                                                                                                                                                                                                                                                                                                                                                                                                                                                                                                                                                                                                                                                                                                                                                                                                                                                                                                                                                                                                                                                                                                                                                                                           |   |         |         |          |   |          |         |          |   |          |         |          |   |         |         |          |   |          |         |          |   |          |         |          |   |         |          |          |   |         |         |          |   |         |         |         |   |          |         |          |   |         |          |         |   |         |          |         |   |         |         |         |   |          |          |         |   |          |          |         |   |         |         |         |   |         |         |         |   |          |          |          |   |         |          |          |   |         |          |          |   |          |          |          |   |          |          |          |   |          |          |          |   |          |          |          |   |          |          |          |   |          |          |          |   |          |          |          |   |          |          |          |   |          |          |          |   |          |          |          |   |          |          |         |   |          |          |          |   |          |          |         |   |          |          |         |   |          |          |         |   |          |          |         |   |          |          |         |   |          |          |          |   |          |          |         |   |          |         |         |   |          |         |         |   |          |         |          |   |          |         |         |
| C                                                                                                                                                                                                                      | 1.16358                                                                                                                                                                                                                                                                                                                                                                                                                                                                                                                                                                                                                                                                                                                                                                                                                                                                                                                                                                                                                                                                                                                                                                                                                                                                                                                                                                                                                                                                                                                                                                                                                                                                                                                                                                                                                                                                                                                                                                                                                                                                                                                                                                                                                                                                                                                                                                                                                                                                                                                                                                                                                                                                                                                                                                                                                                                                                                                                                                                                                                                                                                                                            | 0.01063  | -0.19283 |         |          |   |         |         |          |   |         |         |         |   |         |          |          |   |         |         |          |   |         |         |          |   |         |          |          |   |         |         |          |   |         |         |         |   |         |          |          |   |         |         |         |   |         |         |         |   |         |         |         |   |          |         |         |   |          |         |         |   |         |         |         |   |         |         |         |   |          |          |         |   |         |          |         |   |         |         |         |   |         |          |          |   |         |          |          |   |         |          |          |   |         |          |          |   |         |          |          |   |         |          |          |   |          |          |          |   |          |          |          |   |          |          |          |   |          |          |          |   |          |         |         |   |          |         |         |   |          |         |         |   |          |         |         |   |          |         |         |   |          |          |         |   |          |          |          |   |          |          |         |   |          |          |         |   |          |          |         |                                                                                                                                                                                                                      |                                                                                                                                                                                                                                                                                                                                                                                                                                                                                                                                                                                                                                                                                                                                                                                                                                                                                                                                                                                                                                                                                                                                                                                                                                                                                                                                                                                                                                                                                                                                                                                                                                                                                                                                                                                                                                                                                                                                                                                                                                                                                                                                                                                                                                                                                                                                                                                                                                                                                                                                                                                                                                                                                                                                                                                                                                                                                                                                         |         |          |         |          |         |          |         |          |         |          |                                                                                                                                                                                                                        |                                                                                                                                                                                                                                                                                                                                                                                                                                                                                                                                                                                                                                                                                                                                                                                                                                                                                                                                                                                                                                                                                                                                                                                                                                                                                                                                                                                                                                                                                                                                                                                                                                                                                                                                                                                                                                                                                                                                                                                                                                                                                                                                                                                                                                                                                                                                                                                                                                                                                                                                                                                                                                                                                                                                                                                                                                                                                                                                                                                                                                                                                                                                                           |   |         |         |          |   |          |         |          |   |          |         |          |   |         |         |          |   |          |         |          |   |          |         |          |   |         |          |          |   |         |         |          |   |         |         |         |   |          |         |          |   |         |          |         |   |         |          |         |   |         |         |         |   |          |          |         |   |          |          |         |   |         |         |         |   |         |         |         |   |          |          |          |   |         |          |          |   |         |          |          |   |          |          |          |   |          |          |          |   |          |          |          |   |          |          |          |   |          |          |          |   |          |          |          |   |          |          |          |   |          |          |          |   |          |          |          |   |          |          |          |   |          |          |         |   |          |          |          |   |          |          |         |   |          |          |         |   |          |          |         |   |          |          |         |   |          |          |         |   |          |          |          |   |          |          |         |   |          |         |         |   |          |         |         |   |          |         |          |   |          |         |         |
| C                                                                                                                                                                                                                      | 0.54103                                                                                                                                                                                                                                                                                                                                                                                                                                                                                                                                                                                                                                                                                                                                                                                                                                                                                                                                                                                                                                                                                                                                                                                                                                                                                                                                                                                                                                                                                                                                                                                                                                                                                                                                                                                                                                                                                                                                                                                                                                                                                                                                                                                                                                                                                                                                                                                                                                                                                                                                                                                                                                                                                                                                                                                                                                                                                                                                                                                                                                                                                                                                            | 0.01519  | -2.58784 |         |          |   |         |         |          |   |         |         |         |   |         |          |          |   |         |         |          |   |         |         |          |   |         |          |          |   |         |         |          |   |         |         |         |   |         |          |          |   |         |         |         |   |         |         |         |   |         |         |         |   |          |         |         |   |          |         |         |   |         |         |         |   |         |         |         |   |          |          |         |   |         |          |         |   |         |         |         |   |         |          |          |   |         |          |          |   |         |          |          |   |         |          |          |   |         |          |          |   |         |          |          |   |          |          |          |   |          |          |          |   |          |          |          |   |          |          |          |   |          |         |         |   |          |         |         |   |          |         |         |   |          |         |         |   |          |         |         |   |          |          |         |   |          |          |          |   |          |          |         |   |          |          |         |   |          |          |         |                                                                                                                                                                                                                      |                                                                                                                                                                                                                                                                                                                                                                                                                                                                                                                                                                                                                                                                                                                                                                                                                                                                                                                                                                                                                                                                                                                                                                                                                                                                                                                                                                                                                                                                                                                                                                                                                                                                                                                                                                                                                                                                                                                                                                                                                                                                                                                                                                                                                                                                                                                                                                                                                                                                                                                                                                                                                                                                                                                                                                                                                                                                                                                                         |         |          |         |          |         |          |         |          |         |          |                                                                                                                                                                                                                        |                                                                                                                                                                                                                                                                                                                                                                                                                                                                                                                                                                                                                                                                                                                                                                                                                                                                                                                                                                                                                                                                                                                                                                                                                                                                                                                                                                                                                                                                                                                                                                                                                                                                                                                                                                                                                                                                                                                                                                                                                                                                                                                                                                                                                                                                                                                                                                                                                                                                                                                                                                                                                                                                                                                                                                                                                                                                                                                                                                                                                                                                                                                                                           |   |         |         |          |   |          |         |          |   |          |         |          |   |         |         |          |   |          |         |          |   |          |         |          |   |         |          |          |   |         |         |          |   |         |         |         |   |          |         |          |   |         |          |         |   |         |          |         |   |         |         |         |   |          |          |         |   |          |          |         |   |         |         |         |   |         |         |         |   |          |          |          |   |         |          |          |   |         |          |          |   |          |          |          |   |          |          |          |   |          |          |          |   |          |          |          |   |          |          |          |   |          |          |          |   |          |          |          |   |          |          |          |   |          |          |          |   |          |          |          |   |          |          |         |   |          |          |          |   |          |          |         |   |          |          |         |   |          |          |         |   |          |          |         |   |          |          |         |   |          |          |          |   |          |          |         |   |          |         |         |   |          |         |         |   |          |         |          |   |          |         |         |
| C                                                                                                                                                                                                                      | 2.85089                                                                                                                                                                                                                                                                                                                                                                                                                                                                                                                                                                                                                                                                                                                                                                                                                                                                                                                                                                                                                                                                                                                                                                                                                                                                                                                                                                                                                                                                                                                                                                                                                                                                                                                                                                                                                                                                                                                                                                                                                                                                                                                                                                                                                                                                                                                                                                                                                                                                                                                                                                                                                                                                                                                                                                                                                                                                                                                                                                                                                                                                                                                                            | 0.02796  | -1.98013 |         |          |   |         |         |          |   |         |         |         |   |         |          |          |   |         |         |          |   |         |         |          |   |         |          |          |   |         |         |          |   |         |         |         |   |         |          |          |   |         |         |         |   |         |         |         |   |         |         |         |   |          |         |         |   |          |         |         |   |         |         |         |   |         |         |         |   |          |          |         |   |         |          |         |   |         |         |         |   |         |          |          |   |         |          |          |   |         |          |          |   |         |          |          |   |         |          |          |   |         |          |          |   |          |          |          |   |          |          |          |   |          |          |          |   |          |          |          |   |          |         |         |   |          |         |         |   |          |         |         |   |          |         |         |   |          |         |         |   |          |          |         |   |          |          |          |   |          |          |         |   |          |          |         |   |          |          |         |                                                                                                                                                                                                                      |                                                                                                                                                                                                                                                                                                                                                                                                                                                                                                                                                                                                                                                                                                                                                                                                                                                                                                                                                                                                                                                                                                                                                                                                                                                                                                                                                                                                                                                                                                                                                                                                                                                                                                                                                                                                                                                                                                                                                                                                                                                                                                                                                                                                                                                                                                                                                                                                                                                                                                                                                                                                                                                                                                                                                                                                                                                                                                                                         |         |          |         |          |         |          |         |          |         |          |                                                                                                                                                                                                                        |                                                                                                                                                                                                                                                                                                                                                                                                                                                                                                                                                                                                                                                                                                                                                                                                                                                                                                                                                                                                                                                                                                                                                                                                                                                                                                                                                                                                                                                                                                                                                                                                                                                                                                                                                                                                                                                                                                                                                                                                                                                                                                                                                                                                                                                                                                                                                                                                                                                                                                                                                                                                                                                                                                                                                                                                                                                                                                                                                                                                                                                                                                                                                           |   |         |         |          |   |          |         |          |   |          |         |          |   |         |         |          |   |          |         |          |   |          |         |          |   |         |          |          |   |         |         |          |   |         |         |         |   |          |         |          |   |         |          |         |   |         |          |         |   |         |         |         |   |          |          |         |   |          |          |         |   |         |         |         |   |         |         |         |   |          |          |          |   |         |          |          |   |         |          |          |   |          |          |          |   |          |          |          |   |          |          |          |   |          |          |          |   |          |          |          |   |          |          |          |   |          |          |          |   |          |          |          |   |          |          |          |   |          |          |          |   |          |          |         |   |          |          |          |   |          |          |         |   |          |          |         |   |          |          |         |   |          |          |         |   |          |          |         |   |          |          |          |   |          |          |         |   |          |         |         |   |          |         |         |   |          |         |          |   |          |         |         |
| C                                                                                                                                                                                                                      | 2.50693                                                                                                                                                                                                                                                                                                                                                                                                                                                                                                                                                                                                                                                                                                                                                                                                                                                                                                                                                                                                                                                                                                                                                                                                                                                                                                                                                                                                                                                                                                                                                                                                                                                                                                                                                                                                                                                                                                                                                                                                                                                                                                                                                                                                                                                                                                                                                                                                                                                                                                                                                                                                                                                                                                                                                                                                                                                                                                                                                                                                                                                                                                                                            | 0.02099  | -0.36396 |         |          |   |         |         |          |   |         |         |         |   |         |          |          |   |         |         |          |   |         |         |          |   |         |          |          |   |         |         |          |   |         |         |         |   |         |          |          |   |         |         |         |   |         |         |         |   |         |         |         |   |          |         |         |   |          |         |         |   |         |         |         |   |         |         |         |   |          |          |         |   |         |          |         |   |         |         |         |   |         |          |          |   |         |          |          |   |         |          |          |   |         |          |          |   |         |          |          |   |         |          |          |   |          |          |          |   |          |          |          |   |          |          |          |   |          |          |          |   |          |         |         |   |          |         |         |   |          |         |         |   |          |         |         |   |          |         |         |   |          |          |         |   |          |          |          |   |          |          |         |   |          |          |         |   |          |          |         |                                                                                                                                                                                                                      |                                                                                                                                                                                                                                                                                                                                                                                                                                                                                                                                                                                                                                                                                                                                                                                                                                                                                                                                                                                                                                                                                                                                                                                                                                                                                                                                                                                                                                                                                                                                                                                                                                                                                                                                                                                                                                                                                                                                                                                                                                                                                                                                                                                                                                                                                                                                                                                                                                                                                                                                                                                                                                                                                                                                                                                                                                                                                                                                         |         |          |         |          |         |          |         |          |         |          |                                                                                                                                                                                                                        |                                                                                                                                                                                                                                                                                                                                                                                                                                                                                                                                                                                                                                                                                                                                                                                                                                                                                                                                                                                                                                                                                                                                                                                                                                                                                                                                                                                                                                                                                                                                                                                                                                                                                                                                                                                                                                                                                                                                                                                                                                                                                                                                                                                                                                                                                                                                                                                                                                                                                                                                                                                                                                                                                                                                                                                                                                                                                                                                                                                                                                                                                                                                                           |   |         |         |          |   |          |         |          |   |          |         |          |   |         |         |          |   |          |         |          |   |          |         |          |   |         |          |          |   |         |         |          |   |         |         |         |   |          |         |          |   |         |          |         |   |         |          |         |   |         |         |         |   |          |          |         |   |          |          |         |   |         |         |         |   |         |         |         |   |          |          |          |   |         |          |          |   |         |          |          |   |          |          |          |   |          |          |          |   |          |          |          |   |          |          |          |   |          |          |          |   |          |          |          |   |          |          |          |   |          |          |          |   |          |          |          |   |          |          |          |   |          |          |         |   |          |          |          |   |          |          |         |   |          |          |         |   |          |          |         |   |          |          |         |   |          |          |         |   |          |          |          |   |          |          |         |   |          |         |         |   |          |         |         |   |          |         |          |   |          |         |         |
| C                                                                                                                                                                                                                      | 0.21812                                                                                                                                                                                                                                                                                                                                                                                                                                                                                                                                                                                                                                                                                                                                                                                                                                                                                                                                                                                                                                                                                                                                                                                                                                                                                                                                                                                                                                                                                                                                                                                                                                                                                                                                                                                                                                                                                                                                                                                                                                                                                                                                                                                                                                                                                                                                                                                                                                                                                                                                                                                                                                                                                                                                                                                                                                                                                                                                                                                                                                                                                                                                            | 0.00809  | -1.22945 |         |          |   |         |         |          |   |         |         |         |   |         |          |          |   |         |         |          |   |         |         |          |   |         |          |          |   |         |         |          |   |         |         |         |   |         |          |          |   |         |         |         |   |         |         |         |   |         |         |         |   |          |         |         |   |          |         |         |   |         |         |         |   |         |         |         |   |          |          |         |   |         |          |         |   |         |         |         |   |         |          |          |   |         |          |          |   |         |          |          |   |         |          |          |   |         |          |          |   |         |          |          |   |          |          |          |   |          |          |          |   |          |          |          |   |          |          |          |   |          |         |         |   |          |         |         |   |          |         |         |   |          |         |         |   |          |         |         |   |          |          |         |   |          |          |          |   |          |          |         |   |          |          |         |   |          |          |         |                                                                                                                                                                                                                      |                                                                                                                                                                                                                                                                                                                                                                                                                                                                                                                                                                                                                                                                                                                                                                                                                                                                                                                                                                                                                                                                                                                                                                                                                                                                                                                                                                                                                                                                                                                                                                                                                                                                                                                                                                                                                                                                                                                                                                                                                                                                                                                                                                                                                                                                                                                                                                                                                                                                                                                                                                                                                                                                                                                                                                                                                                                                                                                                         |         |          |         |          |         |          |         |          |         |          |                                                                                                                                                                                                                        |                                                                                                                                                                                                                                                                                                                                                                                                                                                                                                                                                                                                                                                                                                                                                                                                                                                                                                                                                                                                                                                                                                                                                                                                                                                                                                                                                                                                                                                                                                                                                                                                                                                                                                                                                                                                                                                                                                                                                                                                                                                                                                                                                                                                                                                                                                                                                                                                                                                                                                                                                                                                                                                                                                                                                                                                                                                                                                                                                                                                                                                                                                                                                           |   |         |         |          |   |          |         |          |   |          |         |          |   |         |         |          |   |          |         |          |   |          |         |          |   |         |          |          |   |         |         |          |   |         |         |         |   |          |         |          |   |         |          |         |   |         |          |         |   |         |         |         |   |          |          |         |   |          |          |         |   |         |         |         |   |         |         |         |   |          |          |          |   |         |          |          |   |         |          |          |   |          |          |          |   |          |          |          |   |          |          |          |   |          |          |          |   |          |          |          |   |          |          |          |   |          |          |          |   |          |          |          |   |          |          |          |   |          |          |          |   |          |          |         |   |          |          |          |   |          |          |         |   |          |          |         |   |          |          |         |   |          |          |         |   |          |          |         |   |          |          |          |   |          |          |         |   |          |         |         |   |          |         |         |   |          |         |          |   |          |         |         |
| H                                                                                                                                                                                                                      | 3.89902                                                                                                                                                                                                                                                                                                                                                                                                                                                                                                                                                                                                                                                                                                                                                                                                                                                                                                                                                                                                                                                                                                                                                                                                                                                                                                                                                                                                                                                                                                                                                                                                                                                                                                                                                                                                                                                                                                                                                                                                                                                                                                                                                                                                                                                                                                                                                                                                                                                                                                                                                                                                                                                                                                                                                                                                                                                                                                                                                                                                                                                                                                                                            | 0.03581  | -2.25095 |         |          |   |         |         |          |   |         |         |         |   |         |          |          |   |         |         |          |   |         |         |          |   |         |          |          |   |         |         |          |   |         |         |         |   |         |          |          |   |         |         |         |   |         |         |         |   |         |         |         |   |          |         |         |   |          |         |         |   |         |         |         |   |         |         |         |   |          |          |         |   |         |          |         |   |         |         |         |   |         |          |          |   |         |          |          |   |         |          |          |   |         |          |          |   |         |          |          |   |         |          |          |   |          |          |          |   |          |          |          |   |          |          |          |   |          |          |          |   |          |         |         |   |          |         |         |   |          |         |         |   |          |         |         |   |          |         |         |   |          |          |         |   |          |          |          |   |          |          |         |   |          |          |         |   |          |          |         |                                                                                                                                                                                                                      |                                                                                                                                                                                                                                                                                                                                                                                                                                                                                                                                                                                                                                                                                                                                                                                                                                                                                                                                                                                                                                                                                                                                                                                                                                                                                                                                                                                                                                                                                                                                                                                                                                                                                                                                                                                                                                                                                                                                                                                                                                                                                                                                                                                                                                                                                                                                                                                                                                                                                                                                                                                                                                                                                                                                                                                                                                                                                                                                         |         |          |         |          |         |          |         |          |         |          |                                                                                                                                                                                                                        |                                                                                                                                                                                                                                                                                                                                                                                                                                                                                                                                                                                                                                                                                                                                                                                                                                                                                                                                                                                                                                                                                                                                                                                                                                                                                                                                                                                                                                                                                                                                                                                                                                                                                                                                                                                                                                                                                                                                                                                                                                                                                                                                                                                                                                                                                                                                                                                                                                                                                                                                                                                                                                                                                                                                                                                                                                                                                                                                                                                                                                                                                                                                                           |   |         |         |          |   |          |         |          |   |          |         |          |   |         |         |          |   |          |         |          |   |          |         |          |   |         |          |          |   |         |         |          |   |         |         |         |   |          |         |          |   |         |          |         |   |         |          |         |   |         |         |         |   |          |          |         |   |          |          |         |   |         |         |         |   |         |         |         |   |          |          |          |   |         |          |          |   |         |          |          |   |          |          |          |   |          |          |          |   |          |          |          |   |          |          |          |   |          |          |          |   |          |          |          |   |          |          |          |   |          |          |          |   |          |          |          |   |          |          |          |   |          |          |         |   |          |          |          |   |          |          |         |   |          |          |         |   |          |          |         |   |          |          |         |   |          |          |         |   |          |          |          |   |          |          |         |   |          |         |         |   |          |         |         |   |          |         |          |   |          |         |         |
| H                                                                                                                                                                                                                      | 3.33088                                                                                                                                                                                                                                                                                                                                                                                                                                                                                                                                                                                                                                                                                                                                                                                                                                                                                                                                                                                                                                                                                                                                                                                                                                                                                                                                                                                                                                                                                                                                                                                                                                                                                                                                                                                                                                                                                                                                                                                                                                                                                                                                                                                                                                                                                                                                                                                                                                                                                                                                                                                                                                                                                                                                                                                                                                                                                                                                                                                                                                                                                                                                            | 0.02411  | 0.05196  |         |          |   |         |         |          |   |         |         |         |   |         |          |          |   |         |         |          |   |         |         |          |   |         |          |          |   |         |         |          |   |         |         |         |   |         |          |          |   |         |         |         |   |         |         |         |   |         |         |         |   |          |         |         |   |          |         |         |   |         |         |         |   |         |         |         |   |          |          |         |   |         |          |         |   |         |         |         |   |         |          |          |   |         |          |          |   |         |          |          |   |         |          |          |   |         |          |          |   |         |          |          |   |          |          |          |   |          |          |          |   |          |          |          |   |          |          |          |   |          |         |         |   |          |         |         |   |          |         |         |   |          |         |         |   |          |         |         |   |          |          |         |   |          |          |          |   |          |          |         |   |          |          |         |   |          |          |         |                                                                                                                                                                                                                      |                                                                                                                                                                                                                                                                                                                                                                                                                                                                                                                                                                                                                                                                                                                                                                                                                                                                                                                                                                                                                                                                                                                                                                                                                                                                                                                                                                                                                                                                                                                                                                                                                                                                                                                                                                                                                                                                                                                                                                                                                                                                                                                                                                                                                                                                                                                                                                                                                                                                                                                                                                                                                                                                                                                                                                                                                                                                                                                                         |         |          |         |          |         |          |         |          |         |          |                                                                                                                                                                                                                        |                                                                                                                                                                                                                                                                                                                                                                                                                                                                                                                                                                                                                                                                                                                                                                                                                                                                                                                                                                                                                                                                                                                                                                                                                                                                                                                                                                                                                                                                                                                                                                                                                                                                                                                                                                                                                                                                                                                                                                                                                                                                                                                                                                                                                                                                                                                                                                                                                                                                                                                                                                                                                                                                                                                                                                                                                                                                                                                                                                                                                                                                                                                                                           |   |         |         |          |   |          |         |          |   |          |         |          |   |         |         |          |   |          |         |          |   |          |         |          |   |         |          |          |   |         |         |          |   |         |         |         |   |          |         |          |   |         |          |         |   |         |          |         |   |         |         |         |   |          |          |         |   |          |          |         |   |         |         |         |   |         |         |         |   |          |          |          |   |         |          |          |   |         |          |          |   |          |          |          |   |          |          |          |   |          |          |          |   |          |          |          |   |          |          |          |   |          |          |          |   |          |          |          |   |          |          |          |   |          |          |          |   |          |          |          |   |          |          |         |   |          |          |          |   |          |          |         |   |          |          |         |   |          |          |         |   |          |          |         |   |          |          |         |   |          |          |          |   |          |          |         |   |          |         |         |   |          |         |         |   |          |         |          |   |          |         |         |
| H                                                                                                                                                                                                                      | -0.82713                                                                                                                                                                                                                                                                                                                                                                                                                                                                                                                                                                                                                                                                                                                                                                                                                                                                                                                                                                                                                                                                                                                                                                                                                                                                                                                                                                                                                                                                                                                                                                                                                                                                                                                                                                                                                                                                                                                                                                                                                                                                                                                                                                                                                                                                                                                                                                                                                                                                                                                                                                                                                                                                                                                                                                                                                                                                                                                                                                                                                                                                                                                                           | 0.00049  | -1.02063 |         |          |   |         |         |          |   |         |         |         |   |         |          |          |   |         |         |          |   |         |         |          |   |         |          |          |   |         |         |          |   |         |         |         |   |         |          |          |   |         |         |         |   |         |         |         |   |         |         |         |   |          |         |         |   |          |         |         |   |         |         |         |   |         |         |         |   |          |          |         |   |         |          |         |   |         |         |         |   |         |          |          |   |         |          |          |   |         |          |          |   |         |          |          |   |         |          |          |   |         |          |          |   |          |          |          |   |          |          |          |   |          |          |          |   |          |          |          |   |          |         |         |   |          |         |         |   |          |         |         |   |          |         |         |   |          |         |         |   |          |          |         |   |          |          |          |   |          |          |         |   |          |          |         |   |          |          |         |                                                                                                                                                                                                                      |                                                                                                                                                                                                                                                                                                                                                                                                                                                                                                                                                                                                                                                                                                                                                                                                                                                                                                                                                                                                                                                                                                                                                                                                                                                                                                                                                                                                                                                                                                                                                                                                                                                                                                                                                                                                                                                                                                                                                                                                                                                                                                                                                                                                                                                                                                                                                                                                                                                                                                                                                                                                                                                                                                                                                                                                                                                                                                                                         |         |          |         |          |         |          |         |          |         |          |                                                                                                                                                                                                                        |                                                                                                                                                                                                                                                                                                                                                                                                                                                                                                                                                                                                                                                                                                                                                                                                                                                                                                                                                                                                                                                                                                                                                                                                                                                                                                                                                                                                                                                                                                                                                                                                                                                                                                                                                                                                                                                                                                                                                                                                                                                                                                                                                                                                                                                                                                                                                                                                                                                                                                                                                                                                                                                                                                                                                                                                                                                                                                                                                                                                                                                                                                                                                           |   |         |         |          |   |          |         |          |   |          |         |          |   |         |         |          |   |          |         |          |   |          |         |          |   |         |          |          |   |         |         |          |   |         |         |         |   |          |         |          |   |         |          |         |   |         |          |         |   |         |         |         |   |          |          |         |   |          |          |         |   |         |         |         |   |         |         |         |   |          |          |          |   |         |          |          |   |         |          |          |   |          |          |          |   |          |          |          |   |          |          |          |   |          |          |          |   |          |          |          |   |          |          |          |   |          |          |          |   |          |          |          |   |          |          |          |   |          |          |          |   |          |          |         |   |          |          |          |   |          |          |         |   |          |          |         |   |          |          |         |   |          |          |         |   |          |          |         |   |          |          |          |   |          |          |         |   |          |         |         |   |          |         |         |   |          |         |          |   |          |         |         |
| C                                                                                                                                                                                                                      | 0.85488                                                                                                                                                                                                                                                                                                                                                                                                                                                                                                                                                                                                                                                                                                                                                                                                                                                                                                                                                                                                                                                                                                                                                                                                                                                                                                                                                                                                                                                                                                                                                                                                                                                                                                                                                                                                                                                                                                                                                                                                                                                                                                                                                                                                                                                                                                                                                                                                                                                                                                                                                                                                                                                                                                                                                                                                                                                                                                                                                                                                                                                                                                                                            | 0.00394  | 1.29718  |         |          |   |         |         |          |   |         |         |         |   |         |          |          |   |         |         |          |   |         |         |          |   |         |          |          |   |         |         |          |   |         |         |         |   |         |          |          |   |         |         |         |   |         |         |         |   |         |         |         |   |          |         |         |   |          |         |         |   |         |         |         |   |         |         |         |   |          |          |         |   |         |          |         |   |         |         |         |   |         |          |          |   |         |          |          |   |         |          |          |   |         |          |          |   |         |          |          |   |         |          |          |   |          |          |          |   |          |          |          |   |          |          |          |   |          |          |          |   |          |         |         |   |          |         |         |   |          |         |         |   |          |         |         |   |          |         |         |   |          |          |         |   |          |          |          |   |          |          |         |   |          |          |         |   |          |          |         |                                                                                                                                                                                                                      |                                                                                                                                                                                                                                                                                                                                                                                                                                                                                                                                                                                                                                                                                                                                                                                                                                                                                                                                                                                                                                                                                                                                                                                                                                                                                                                                                                                                                                                                                                                                                                                                                                                                                                                                                                                                                                                                                                                                                                                                                                                                                                                                                                                                                                                                                                                                                                                                                                                                                                                                                                                                                                                                                                                                                                                                                                                                                                                                         |         |          |         |          |         |          |         |          |         |          |                                                                                                                                                                                                                        |                                                                                                                                                                                                                                                                                                                                                                                                                                                                                                                                                                                                                                                                                                                                                                                                                                                                                                                                                                                                                                                                                                                                                                                                                                                                                                                                                                                                                                                                                                                                                                                                                                                                                                                                                                                                                                                                                                                                                                                                                                                                                                                                                                                                                                                                                                                                                                                                                                                                                                                                                                                                                                                                                                                                                                                                                                                                                                                                                                                                                                                                                                                                                           |   |         |         |          |   |          |         |          |   |          |         |          |   |         |         |          |   |          |         |          |   |          |         |          |   |         |          |          |   |         |         |          |   |         |         |         |   |          |         |          |   |         |          |         |   |         |          |         |   |         |         |         |   |          |          |         |   |          |          |         |   |         |         |         |   |         |         |         |   |          |          |          |   |         |          |          |   |         |          |          |   |          |          |          |   |          |          |          |   |          |          |          |   |          |          |          |   |          |          |          |   |          |          |          |   |          |          |          |   |          |          |          |   |          |          |          |   |          |          |          |   |          |          |         |   |          |          |          |   |          |          |         |   |          |          |         |   |          |          |         |   |          |          |         |   |          |          |         |   |          |          |          |   |          |          |         |   |          |         |         |   |          |         |         |   |          |         |          |   |          |         |         |
| C                                                                                                                                                                                                                      | 0.70274                                                                                                                                                                                                                                                                                                                                                                                                                                                                                                                                                                                                                                                                                                                                                                                                                                                                                                                                                                                                                                                                                                                                                                                                                                                                                                                                                                                                                                                                                                                                                                                                                                                                                                                                                                                                                                                                                                                                                                                                                                                                                                                                                                                                                                                                                                                                                                                                                                                                                                                                                                                                                                                                                                                                                                                                                                                                                                                                                                                                                                                                                                                                            | -0.00392 | 4.15429  |         |          |   |         |         |          |   |         |         |         |   |         |          |          |   |         |         |          |   |         |         |          |   |         |          |          |   |         |         |          |   |         |         |         |   |         |          |          |   |         |         |         |   |         |         |         |   |         |         |         |   |          |         |         |   |          |         |         |   |         |         |         |   |         |         |         |   |          |          |         |   |         |          |         |   |         |         |         |   |         |          |          |   |         |          |          |   |         |          |          |   |         |          |          |   |         |          |          |   |         |          |          |   |          |          |          |   |          |          |          |   |          |          |          |   |          |          |          |   |          |         |         |   |          |         |         |   |          |         |         |   |          |         |         |   |          |         |         |   |          |          |         |   |          |          |          |   |          |          |         |   |          |          |         |   |          |          |         |                                                                                                                                                                                                                      |                                                                                                                                                                                                                                                                                                                                                                                                                                                                                                                                                                                                                                                                                                                                                                                                                                                                                                                                                                                                                                                                                                                                                                                                                                                                                                                                                                                                                                                                                                                                                                                                                                                                                                                                                                                                                                                                                                                                                                                                                                                                                                                                                                                                                                                                                                                                                                                                                                                                                                                                                                                                                                                                                                                                                                                                                                                                                                                                         |         |          |         |          |         |          |         |          |         |          |                                                                                                                                                                                                                        |                                                                                                                                                                                                                                                                                                                                                                                                                                                                                                                                                                                                                                                                                                                                                                                                                                                                                                                                                                                                                                                                                                                                                                                                                                                                                                                                                                                                                                                                                                                                                                                                                                                                                                                                                                                                                                                                                                                                                                                                                                                                                                                                                                                                                                                                                                                                                                                                                                                                                                                                                                                                                                                                                                                                                                                                                                                                                                                                                                                                                                                                                                                                                           |   |         |         |          |   |          |         |          |   |          |         |          |   |         |         |          |   |          |         |          |   |          |         |          |   |         |          |          |   |         |         |          |   |         |         |         |   |          |         |          |   |         |          |         |   |         |          |         |   |         |         |         |   |          |          |         |   |          |          |         |   |         |         |         |   |         |         |         |   |          |          |          |   |         |          |          |   |         |          |          |   |          |          |          |   |          |          |          |   |          |          |          |   |          |          |          |   |          |          |          |   |          |          |          |   |          |          |          |   |          |          |          |   |          |          |          |   |          |          |          |   |          |          |         |   |          |          |          |   |          |          |         |   |          |          |         |   |          |          |         |   |          |          |         |   |          |          |         |   |          |          |          |   |          |          |         |   |          |         |         |   |          |         |         |   |          |         |          |   |          |         |         |
| C                                                                                                                                                                                                                      | 1.98212                                                                                                                                                                                                                                                                                                                                                                                                                                                                                                                                                                                                                                                                                                                                                                                                                                                                                                                                                                                                                                                                                                                                                                                                                                                                                                                                                                                                                                                                                                                                                                                                                                                                                                                                                                                                                                                                                                                                                                                                                                                                                                                                                                                                                                                                                                                                                                                                                                                                                                                                                                                                                                                                                                                                                                                                                                                                                                                                                                                                                                                                                                                                            | 0.00845  | 2.14581  |         |          |   |         |         |          |   |         |         |         |   |         |          |          |   |         |         |          |   |         |         |          |   |         |          |          |   |         |         |          |   |         |         |         |   |         |          |          |   |         |         |         |   |         |         |         |   |         |         |         |   |          |         |         |   |          |         |         |   |         |         |         |   |         |         |         |   |          |          |         |   |         |          |         |   |         |         |         |   |         |          |          |   |         |          |          |   |         |          |          |   |         |          |          |   |         |          |          |   |         |          |          |   |          |          |          |   |          |          |          |   |          |          |          |   |          |          |          |   |          |         |         |   |          |         |         |   |          |         |         |   |          |         |         |   |          |         |         |   |          |          |         |   |          |          |          |   |          |          |         |   |          |          |         |   |          |          |         |                                                                                                                                                                                                                      |                                                                                                                                                                                                                                                                                                                                                                                                                                                                                                                                                                                                                                                                                                                                                                                                                                                                                                                                                                                                                                                                                                                                                                                                                                                                                                                                                                                                                                                                                                                                                                                                                                                                                                                                                                                                                                                                                                                                                                                                                                                                                                                                                                                                                                                                                                                                                                                                                                                                                                                                                                                                                                                                                                                                                                                                                                                                                                                                         |         |          |         |          |         |          |         |          |         |          |                                                                                                                                                                                                                        |                                                                                                                                                                                                                                                                                                                                                                                                                                                                                                                                                                                                                                                                                                                                                                                                                                                                                                                                                                                                                                                                                                                                                                                                                                                                                                                                                                                                                                                                                                                                                                                                                                                                                                                                                                                                                                                                                                                                                                                                                                                                                                                                                                                                                                                                                                                                                                                                                                                                                                                                                                                                                                                                                                                                                                                                                                                                                                                                                                                                                                                                                                                                                           |   |         |         |          |   |          |         |          |   |          |         |          |   |         |         |          |   |          |         |          |   |          |         |          |   |         |          |          |   |         |         |          |   |         |         |         |   |          |         |          |   |         |          |         |   |         |          |         |   |         |         |         |   |          |          |         |   |          |          |         |   |         |         |         |   |         |         |         |   |          |          |          |   |         |          |          |   |         |          |          |   |          |          |          |   |          |          |          |   |          |          |          |   |          |          |          |   |          |          |          |   |          |          |          |   |          |          |          |   |          |          |          |   |          |          |          |   |          |          |          |   |          |          |         |   |          |          |          |   |          |          |         |   |          |          |         |   |          |          |         |   |          |          |         |   |          |          |         |   |          |          |          |   |          |          |         |   |          |         |         |   |          |         |         |   |          |         |          |   |          |         |         |
| C                                                                                                                                                                                                                      | -0.42148                                                                                                                                                                                                                                                                                                                                                                                                                                                                                                                                                                                                                                                                                                                                                                                                                                                                                                                                                                                                                                                                                                                                                                                                                                                                                                                                                                                                                                                                                                                                                                                                                                                                                                                                                                                                                                                                                                                                                                                                                                                                                                                                                                                                                                                                                                                                                                                                                                                                                                                                                                                                                                                                                                                                                                                                                                                                                                                                                                                                                                                                                                                                           | -0.00589 | 1.96202  |         |          |   |         |         |          |   |         |         |         |   |         |          |          |   |         |         |          |   |         |         |          |   |         |          |          |   |         |         |          |   |         |         |         |   |         |          |          |   |         |         |         |   |         |         |         |   |         |         |         |   |          |         |         |   |          |         |         |   |         |         |         |   |         |         |         |   |          |          |         |   |         |          |         |   |         |         |         |   |         |          |          |   |         |          |          |   |         |          |          |   |         |          |          |   |         |          |          |   |         |          |          |   |          |          |          |   |          |          |          |   |          |          |          |   |          |          |          |   |          |         |         |   |          |         |         |   |          |         |         |   |          |         |         |   |          |         |         |   |          |          |         |   |          |          |          |   |          |          |         |   |          |          |         |   |          |          |         |                                                                                                                                                                                                                      |                                                                                                                                                                                                                                                                                                                                                                                                                                                                                                                                                                                                                                                                                                                                                                                                                                                                                                                                                                                                                                                                                                                                                                                                                                                                                                                                                                                                                                                                                                                                                                                                                                                                                                                                                                                                                                                                                                                                                                                                                                                                                                                                                                                                                                                                                                                                                                                                                                                                                                                                                                                                                                                                                                                                                                                                                                                                                                                                         |         |          |         |          |         |          |         |          |         |          |                                                                                                                                                                                                                        |                                                                                                                                                                                                                                                                                                                                                                                                                                                                                                                                                                                                                                                                                                                                                                                                                                                                                                                                                                                                                                                                                                                                                                                                                                                                                                                                                                                                                                                                                                                                                                                                                                                                                                                                                                                                                                                                                                                                                                                                                                                                                                                                                                                                                                                                                                                                                                                                                                                                                                                                                                                                                                                                                                                                                                                                                                                                                                                                                                                                                                                                                                                                                           |   |         |         |          |   |          |         |          |   |          |         |          |   |         |         |          |   |          |         |          |   |          |         |          |   |         |          |          |   |         |         |          |   |         |         |         |   |          |         |          |   |         |          |         |   |         |          |         |   |         |         |         |   |          |          |         |   |          |          |         |   |         |         |         |   |         |         |         |   |          |          |          |   |         |          |          |   |         |          |          |   |          |          |          |   |          |          |          |   |          |          |          |   |          |          |          |   |          |          |          |   |          |          |          |   |          |          |          |   |          |          |          |   |          |          |          |   |          |          |          |   |          |          |         |   |          |          |          |   |          |          |         |   |          |          |         |   |          |          |         |   |          |          |         |   |          |          |         |   |          |          |          |   |          |          |         |   |          |         |         |   |          |         |         |   |          |         |          |   |          |         |         |
| C                                                                                                                                                                                                                      | -0.43413                                                                                                                                                                                                                                                                                                                                                                                                                                                                                                                                                                                                                                                                                                                                                                                                                                                                                                                                                                                                                                                                                                                                                                                                                                                                                                                                                                                                                                                                                                                                                                                                                                                                                                                                                                                                                                                                                                                                                                                                                                                                                                                                                                                                                                                                                                                                                                                                                                                                                                                                                                                                                                                                                                                                                                                                                                                                                                                                                                                                                                                                                                                                           | -0.00915 | 3.36344  |         |          |   |         |         |          |   |         |         |         |   |         |          |          |   |         |         |          |   |         |         |          |   |         |          |          |   |         |         |          |   |         |         |         |   |         |          |          |   |         |         |         |   |         |         |         |   |         |         |         |   |          |         |         |   |          |         |         |   |         |         |         |   |         |         |         |   |          |          |         |   |         |          |         |   |         |         |         |   |         |          |          |   |         |          |          |   |         |          |          |   |         |          |          |   |         |          |          |   |         |          |          |   |          |          |          |   |          |          |          |   |          |          |          |   |          |          |          |   |          |         |         |   |          |         |         |   |          |         |         |   |          |         |         |   |          |         |         |   |          |          |         |   |          |          |          |   |          |          |         |   |          |          |         |   |          |          |         |                                                                                                                                                                                                                      |                                                                                                                                                                                                                                                                                                                                                                                                                                                                                                                                                                                                                                                                                                                                                                                                                                                                                                                                                                                                                                                                                                                                                                                                                                                                                                                                                                                                                                                                                                                                                                                                                                                                                                                                                                                                                                                                                                                                                                                                                                                                                                                                                                                                                                                                                                                                                                                                                                                                                                                                                                                                                                                                                                                                                                                                                                                                                                                                         |         |          |         |          |         |          |         |          |         |          |                                                                                                                                                                                                                        |                                                                                                                                                                                                                                                                                                                                                                                                                                                                                                                                                                                                                                                                                                                                                                                                                                                                                                                                                                                                                                                                                                                                                                                                                                                                                                                                                                                                                                                                                                                                                                                                                                                                                                                                                                                                                                                                                                                                                                                                                                                                                                                                                                                                                                                                                                                                                                                                                                                                                                                                                                                                                                                                                                                                                                                                                                                                                                                                                                                                                                                                                                                                                           |   |         |         |          |   |          |         |          |   |          |         |          |   |         |         |          |   |          |         |          |   |          |         |          |   |         |          |          |   |         |         |          |   |         |         |         |   |          |         |          |   |         |          |         |   |         |          |         |   |         |         |         |   |          |          |         |   |          |          |         |   |         |         |         |   |         |         |         |   |          |          |          |   |         |          |          |   |         |          |          |   |          |          |          |   |          |          |          |   |          |          |          |   |          |          |          |   |          |          |          |   |          |          |          |   |          |          |          |   |          |          |          |   |          |          |          |   |          |          |          |   |          |          |         |   |          |          |          |   |          |          |         |   |          |          |         |   |          |          |         |   |          |          |         |   |          |          |         |   |          |          |          |   |          |          |         |   |          |         |         |   |          |         |         |   |          |         |          |   |          |         |         |
| C                                                                                                                                                                                                                      | 1.93370                                                                                                                                                                                                                                                                                                                                                                                                                                                                                                                                                                                                                                                                                                                                                                                                                                                                                                                                                                                                                                                                                                                                                                                                                                                                                                                                                                                                                                                                                                                                                                                                                                                                                                                                                                                                                                                                                                                                                                                                                                                                                                                                                                                                                                                                                                                                                                                                                                                                                                                                                                                                                                                                                                                                                                                                                                                                                                                                                                                                                                                                                                                                            | 0.00480  | 3.52804  |         |          |   |         |         |          |   |         |         |         |   |         |          |          |   |         |         |          |   |         |         |          |   |         |          |          |   |         |         |          |   |         |         |         |   |         |          |          |   |         |         |         |   |         |         |         |   |         |         |         |   |          |         |         |   |          |         |         |   |         |         |         |   |         |         |         |   |          |          |         |   |         |          |         |   |         |         |         |   |         |          |          |   |         |          |          |   |         |          |          |   |         |          |          |   |         |          |          |   |         |          |          |   |          |          |          |   |          |          |          |   |          |          |          |   |          |          |          |   |          |         |         |   |          |         |         |   |          |         |         |   |          |         |         |   |          |         |         |   |          |          |         |   |          |          |          |   |          |          |         |   |          |          |         |   |          |          |         |                                                                                                                                                                                                                      |                                                                                                                                                                                                                                                                                                                                                                                                                                                                                                                                                                                                                                                                                                                                                                                                                                                                                                                                                                                                                                                                                                                                                                                                                                                                                                                                                                                                                                                                                                                                                                                                                                                                                                                                                                                                                                                                                                                                                                                                                                                                                                                                                                                                                                                                                                                                                                                                                                                                                                                                                                                                                                                                                                                                                                                                                                                                                                                                         |         |          |         |          |         |          |         |          |         |          |                                                                                                                                                                                                                        |                                                                                                                                                                                                                                                                                                                                                                                                                                                                                                                                                                                                                                                                                                                                                                                                                                                                                                                                                                                                                                                                                                                                                                                                                                                                                                                                                                                                                                                                                                                                                                                                                                                                                                                                                                                                                                                                                                                                                                                                                                                                                                                                                                                                                                                                                                                                                                                                                                                                                                                                                                                                                                                                                                                                                                                                                                                                                                                                                                                                                                                                                                                                                           |   |         |         |          |   |          |         |          |   |          |         |          |   |         |         |          |   |          |         |          |   |          |         |          |   |         |          |          |   |         |         |          |   |         |         |         |   |          |         |          |   |         |          |         |   |         |          |         |   |         |         |         |   |          |          |         |   |          |          |         |   |         |         |         |   |         |         |         |   |          |          |          |   |         |          |          |   |         |          |          |   |          |          |          |   |          |          |          |   |          |          |          |   |          |          |          |   |          |          |          |   |          |          |          |   |          |          |          |   |          |          |          |   |          |          |          |   |          |          |          |   |          |          |         |   |          |          |          |   |          |          |         |   |          |          |         |   |          |          |         |   |          |          |         |   |          |          |         |   |          |          |          |   |          |          |         |   |          |         |         |   |          |         |         |   |          |         |          |   |          |         |         |
| H                                                                                                                                                                                                                      | 2.96994                                                                                                                                                                                                                                                                                                                                                                                                                                                                                                                                                                                                                                                                                                                                                                                                                                                                                                                                                                                                                                                                                                                                                                                                                                                                                                                                                                                                                                                                                                                                                                                                                                                                                                                                                                                                                                                                                                                                                                                                                                                                                                                                                                                                                                                                                                                                                                                                                                                                                                                                                                                                                                                                                                                                                                                                                                                                                                                                                                                                                                                                                                                                            | 0.01530  | 1.72341  |         |          |   |         |         |          |   |         |         |         |   |         |          |          |   |         |         |          |   |         |         |          |   |         |          |          |   |         |         |          |   |         |         |         |   |         |          |          |   |         |         |         |   |         |         |         |   |         |         |         |   |          |         |         |   |          |         |         |   |         |         |         |   |         |         |         |   |          |          |         |   |         |          |         |   |         |         |         |   |         |          |          |   |         |          |          |   |         |          |          |   |         |          |          |   |         |          |          |   |         |          |          |   |          |          |          |   |          |          |          |   |          |          |          |   |          |          |          |   |          |         |         |   |          |         |         |   |          |         |         |   |          |         |         |   |          |         |         |   |          |          |         |   |          |          |          |   |          |          |         |   |          |          |         |   |          |          |         |                                                                                                                                                                                                                      |                                                                                                                                                                                                                                                                                                                                                                                                                                                                                                                                                                                                                                                                                                                                                                                                                                                                                                                                                                                                                                                                                                                                                                                                                                                                                                                                                                                                                                                                                                                                                                                                                                                                                                                                                                                                                                                                                                                                                                                                                                                                                                                                                                                                                                                                                                                                                                                                                                                                                                                                                                                                                                                                                                                                                                                                                                                                                                                                         |         |          |         |          |         |          |         |          |         |          |                                                                                                                                                                                                                        |                                                                                                                                                                                                                                                                                                                                                                                                                                                                                                                                                                                                                                                                                                                                                                                                                                                                                                                                                                                                                                                                                                                                                                                                                                                                                                                                                                                                                                                                                                                                                                                                                                                                                                                                                                                                                                                                                                                                                                                                                                                                                                                                                                                                                                                                                                                                                                                                                                                                                                                                                                                                                                                                                                                                                                                                                                                                                                                                                                                                                                                                                                                                                           |   |         |         |          |   |          |         |          |   |          |         |          |   |         |         |          |   |          |         |          |   |          |         |          |   |         |          |          |   |         |         |          |   |         |         |         |   |          |         |          |   |         |          |         |   |         |          |         |   |         |         |         |   |          |          |         |   |          |          |         |   |         |         |         |   |         |         |         |   |          |          |          |   |         |          |          |   |         |          |          |   |          |          |          |   |          |          |          |   |          |          |          |   |          |          |          |   |          |          |          |   |          |          |          |   |          |          |          |   |          |          |          |   |          |          |          |   |          |          |          |   |          |          |         |   |          |          |          |   |          |          |         |   |          |          |         |   |          |          |         |   |          |          |         |   |          |          |         |   |          |          |          |   |          |          |         |   |          |         |         |   |          |         |         |   |          |         |          |   |          |         |         |
| H                                                                                                                                                                                                                      | -1.38052                                                                                                                                                                                                                                                                                                                                                                                                                                                                                                                                                                                                                                                                                                                                                                                                                                                                                                                                                                                                                                                                                                                                                                                                                                                                                                                                                                                                                                                                                                                                                                                                                                                                                                                                                                                                                                                                                                                                                                                                                                                                                                                                                                                                                                                                                                                                                                                                                                                                                                                                                                                                                                                                                                                                                                                                                                                                                                                                                                                                                                                                                                                                           | -0.01626 | 3.87609  |         |          |   |         |         |          |   |         |         |         |   |         |          |          |   |         |         |          |   |         |         |          |   |         |          |          |   |         |         |          |   |         |         |         |   |         |          |          |   |         |         |         |   |         |         |         |   |         |         |         |   |          |         |         |   |          |         |         |   |         |         |         |   |         |         |         |   |          |          |         |   |         |          |         |   |         |         |         |   |         |          |          |   |         |          |          |   |         |          |          |   |         |          |          |   |         |          |          |   |         |          |          |   |          |          |          |   |          |          |          |   |          |          |          |   |          |          |          |   |          |         |         |   |          |         |         |   |          |         |         |   |          |         |         |   |          |         |         |   |          |          |         |   |          |          |          |   |          |          |         |   |          |          |         |   |          |          |         |                                                                                                                                                                                                                      |                                                                                                                                                                                                                                                                                                                                                                                                                                                                                                                                                                                                                                                                                                                                                                                                                                                                                                                                                                                                                                                                                                                                                                                                                                                                                                                                                                                                                                                                                                                                                                                                                                                                                                                                                                                                                                                                                                                                                                                                                                                                                                                                                                                                                                                                                                                                                                                                                                                                                                                                                                                                                                                                                                                                                                                                                                                                                                                                         |         |          |         |          |         |          |         |          |         |          |                                                                                                                                                                                                                        |                                                                                                                                                                                                                                                                                                                                                                                                                                                                                                                                                                                                                                                                                                                                                                                                                                                                                                                                                                                                                                                                                                                                                                                                                                                                                                                                                                                                                                                                                                                                                                                                                                                                                                                                                                                                                                                                                                                                                                                                                                                                                                                                                                                                                                                                                                                                                                                                                                                                                                                                                                                                                                                                                                                                                                                                                                                                                                                                                                                                                                                                                                                                                           |   |         |         |          |   |          |         |          |   |          |         |          |   |         |         |          |   |          |         |          |   |          |         |          |   |         |          |          |   |         |         |          |   |         |         |         |   |          |         |          |   |         |          |         |   |         |          |         |   |         |         |         |   |          |          |         |   |          |          |         |   |         |         |         |   |         |         |         |   |          |          |          |   |         |          |          |   |         |          |          |   |          |          |          |   |          |          |          |   |          |          |          |   |          |          |          |   |          |          |          |   |          |          |          |   |          |          |          |   |          |          |          |   |          |          |          |   |          |          |          |   |          |          |         |   |          |          |          |   |          |          |         |   |          |          |         |   |          |          |         |   |          |          |         |   |          |          |         |   |          |          |          |   |          |          |         |   |          |         |         |   |          |         |         |   |          |         |          |   |          |         |         |
| H                                                                                                                                                                                                                      | 2.85548                                                                                                                                                                                                                                                                                                                                                                                                                                                                                                                                                                                                                                                                                                                                                                                                                                                                                                                                                                                                                                                                                                                                                                                                                                                                                                                                                                                                                                                                                                                                                                                                                                                                                                                                                                                                                                                                                                                                                                                                                                                                                                                                                                                                                                                                                                                                                                                                                                                                                                                                                                                                                                                                                                                                                                                                                                                                                                                                                                                                                                                                                                                                            | 0.00889  | 4.09495  |         |          |   |         |         |          |   |         |         |         |   |         |          |          |   |         |         |          |   |         |         |          |   |         |          |          |   |         |         |          |   |         |         |         |   |         |          |          |   |         |         |         |   |         |         |         |   |         |         |         |   |          |         |         |   |          |         |         |   |         |         |         |   |         |         |         |   |          |          |         |   |         |          |         |   |         |         |         |   |         |          |          |   |         |          |          |   |         |          |          |   |         |          |          |   |         |          |          |   |         |          |          |   |          |          |          |   |          |          |          |   |          |          |          |   |          |          |          |   |          |         |         |   |          |         |         |   |          |         |         |   |          |         |         |   |          |         |         |   |          |          |         |   |          |          |          |   |          |          |         |   |          |          |         |   |          |          |         |                                                                                                                                                                                                                      |                                                                                                                                                                                                                                                                                                                                                                                                                                                                                                                                                                                                                                                                                                                                                                                                                                                                                                                                                                                                                                                                                                                                                                                                                                                                                                                                                                                                                                                                                                                                                                                                                                                                                                                                                                                                                                                                                                                                                                                                                                                                                                                                                                                                                                                                                                                                                                                                                                                                                                                                                                                                                                                                                                                                                                                                                                                                                                                                         |         |          |         |          |         |          |         |          |         |          |                                                                                                                                                                                                                        |                                                                                                                                                                                                                                                                                                                                                                                                                                                                                                                                                                                                                                                                                                                                                                                                                                                                                                                                                                                                                                                                                                                                                                                                                                                                                                                                                                                                                                                                                                                                                                                                                                                                                                                                                                                                                                                                                                                                                                                                                                                                                                                                                                                                                                                                                                                                                                                                                                                                                                                                                                                                                                                                                                                                                                                                                                                                                                                                                                                                                                                                                                                                                           |   |         |         |          |   |          |         |          |   |          |         |          |   |         |         |          |   |          |         |          |   |          |         |          |   |         |          |          |   |         |         |          |   |         |         |         |   |          |         |          |   |         |          |         |   |         |          |         |   |         |         |         |   |          |          |         |   |          |          |         |   |         |         |         |   |         |         |         |   |          |          |          |   |         |          |          |   |         |          |          |   |          |          |          |   |          |          |          |   |          |          |          |   |          |          |          |   |          |          |          |   |          |          |          |   |          |          |          |   |          |          |          |   |          |          |          |   |          |          |          |   |          |          |         |   |          |          |          |   |          |          |         |   |          |          |         |   |          |          |         |   |          |          |         |   |          |          |         |   |          |          |          |   |          |          |         |   |          |         |         |   |          |         |         |   |          |         |          |   |          |         |         |
| H                                                                                                                                                                                                                      | 0.61538                                                                                                                                                                                                                                                                                                                                                                                                                                                                                                                                                                                                                                                                                                                                                                                                                                                                                                                                                                                                                                                                                                                                                                                                                                                                                                                                                                                                                                                                                                                                                                                                                                                                                                                                                                                                                                                                                                                                                                                                                                                                                                                                                                                                                                                                                                                                                                                                                                                                                                                                                                                                                                                                                                                                                                                                                                                                                                                                                                                                                                                                                                                                            | -0.00687 | 5.23298  |         |          |   |         |         |          |   |         |         |         |   |         |          |          |   |         |         |          |   |         |         |          |   |         |          |          |   |         |         |          |   |         |         |         |   |         |          |          |   |         |         |         |   |         |         |         |   |         |         |         |   |          |         |         |   |          |         |         |   |         |         |         |   |         |         |         |   |          |          |         |   |         |          |         |   |         |         |         |   |         |          |          |   |         |          |          |   |         |          |          |   |         |          |          |   |         |          |          |   |         |          |          |   |          |          |          |   |          |          |          |   |          |          |          |   |          |          |          |   |          |         |         |   |          |         |         |   |          |         |         |   |          |         |         |   |          |         |         |   |          |          |         |   |          |          |          |   |          |          |         |   |          |          |         |   |          |          |         |                                                                                                                                                                                                                      |                                                                                                                                                                                                                                                                                                                                                                                                                                                                                                                                                                                                                                                                                                                                                                                                                                                                                                                                                                                                                                                                                                                                                                                                                                                                                                                                                                                                                                                                                                                                                                                                                                                                                                                                                                                                                                                                                                                                                                                                                                                                                                                                                                                                                                                                                                                                                                                                                                                                                                                                                                                                                                                                                                                                                                                                                                                                                                                                         |         |          |         |          |         |          |         |          |         |          |                                                                                                                                                                                                                        |                                                                                                                                                                                                                                                                                                                                                                                                                                                                                                                                                                                                                                                                                                                                                                                                                                                                                                                                                                                                                                                                                                                                                                                                                                                                                                                                                                                                                                                                                                                                                                                                                                                                                                                                                                                                                                                                                                                                                                                                                                                                                                                                                                                                                                                                                                                                                                                                                                                                                                                                                                                                                                                                                                                                                                                                                                                                                                                                                                                                                                                                                                                                                           |   |         |         |          |   |          |         |          |   |          |         |          |   |         |         |          |   |          |         |          |   |          |         |          |   |         |          |          |   |         |         |          |   |         |         |         |   |          |         |          |   |         |          |         |   |         |          |         |   |         |         |         |   |          |          |         |   |          |          |         |   |         |         |         |   |         |         |         |   |          |          |          |   |         |          |          |   |         |          |          |   |          |          |          |   |          |          |          |   |          |          |          |   |          |          |          |   |          |          |          |   |          |          |          |   |          |          |          |   |          |          |          |   |          |          |          |   |          |          |          |   |          |          |         |   |          |          |          |   |          |          |         |   |          |          |         |   |          |          |         |   |          |          |         |   |          |          |         |   |          |          |          |   |          |          |         |   |          |         |         |   |          |         |         |   |          |         |          |   |          |         |         |
| C                                                                                                                                                                                                                      | -0.57018                                                                                                                                                                                                                                                                                                                                                                                                                                                                                                                                                                                                                                                                                                                                                                                                                                                                                                                                                                                                                                                                                                                                                                                                                                                                                                                                                                                                                                                                                                                                                                                                                                                                                                                                                                                                                                                                                                                                                                                                                                                                                                                                                                                                                                                                                                                                                                                                                                                                                                                                                                                                                                                                                                                                                                                                                                                                                                                                                                                                                                                                                                                                           | 0.01261  | -3.61735 |         |          |   |         |         |          |   |         |         |         |   |         |          |          |   |         |         |          |   |         |         |          |   |         |          |          |   |         |         |          |   |         |         |         |   |         |          |          |   |         |         |         |   |         |         |         |   |         |         |         |   |          |         |         |   |          |         |         |   |         |         |         |   |         |         |         |   |          |          |         |   |         |          |         |   |         |         |         |   |         |          |          |   |         |          |          |   |         |          |          |   |         |          |          |   |         |          |          |   |         |          |          |   |          |          |          |   |          |          |          |   |          |          |          |   |          |          |          |   |          |         |         |   |          |         |         |   |          |         |         |   |          |         |         |   |          |         |         |   |          |          |         |   |          |          |          |   |          |          |         |   |          |          |         |   |          |          |         |                                                                                                                                                                                                                      |                                                                                                                                                                                                                                                                                                                                                                                                                                                                                                                                                                                                                                                                                                                                                                                                                                                                                                                                                                                                                                                                                                                                                                                                                                                                                                                                                                                                                                                                                                                                                                                                                                                                                                                                                                                                                                                                                                                                                                                                                                                                                                                                                                                                                                                                                                                                                                                                                                                                                                                                                                                                                                                                                                                                                                                                                                                                                                                                         |         |          |         |          |         |          |         |          |         |          |                                                                                                                                                                                                                        |                                                                                                                                                                                                                                                                                                                                                                                                                                                                                                                                                                                                                                                                                                                                                                                                                                                                                                                                                                                                                                                                                                                                                                                                                                                                                                                                                                                                                                                                                                                                                                                                                                                                                                                                                                                                                                                                                                                                                                                                                                                                                                                                                                                                                                                                                                                                                                                                                                                                                                                                                                                                                                                                                                                                                                                                                                                                                                                                                                                                                                                                                                                                                           |   |         |         |          |   |          |         |          |   |          |         |          |   |         |         |          |   |          |         |          |   |          |         |          |   |         |          |          |   |         |         |          |   |         |         |         |   |          |         |          |   |         |          |         |   |         |          |         |   |         |         |         |   |          |          |         |   |          |          |         |   |         |         |         |   |         |         |         |   |          |          |          |   |         |          |          |   |         |          |          |   |          |          |          |   |          |          |          |   |          |          |          |   |          |          |          |   |          |          |          |   |          |          |          |   |          |          |          |   |          |          |          |   |          |          |          |   |          |          |          |   |          |          |         |   |          |          |          |   |          |          |         |   |          |          |         |   |          |          |         |   |          |          |         |   |          |          |         |   |          |          |          |   |          |          |         |   |          |         |         |   |          |         |         |   |          |         |          |   |          |         |         |
| H                                                                                                                                                                                                                      | -0.10096                                                                                                                                                                                                                                                                                                                                                                                                                                                                                                                                                                                                                                                                                                                                                                                                                                                                                                                                                                                                                                                                                                                                                                                                                                                                                                                                                                                                                                                                                                                                                                                                                                                                                                                                                                                                                                                                                                                                                                                                                                                                                                                                                                                                                                                                                                                                                                                                                                                                                                                                                                                                                                                                                                                                                                                                                                                                                                                                                                                                                                                                                                                                           | 0.01778  | -4.60512 |         |          |   |         |         |          |   |         |         |         |   |         |          |          |   |         |         |          |   |         |         |          |   |         |          |          |   |         |         |          |   |         |         |         |   |         |          |          |   |         |         |         |   |         |         |         |   |         |         |         |   |          |         |         |   |          |         |         |   |         |         |         |   |         |         |         |   |          |          |         |   |         |          |         |   |         |         |         |   |         |          |          |   |         |          |          |   |         |          |          |   |         |          |          |   |         |          |          |   |         |          |          |   |          |          |          |   |          |          |          |   |          |          |          |   |          |          |          |   |          |         |         |   |          |         |         |   |          |         |         |   |          |         |         |   |          |         |         |   |          |          |         |   |          |          |          |   |          |          |         |   |          |          |         |   |          |          |         |                                                                                                                                                                                                                      |                                                                                                                                                                                                                                                                                                                                                                                                                                                                                                                                                                                                                                                                                                                                                                                                                                                                                                                                                                                                                                                                                                                                                                                                                                                                                                                                                                                                                                                                                                                                                                                                                                                                                                                                                                                                                                                                                                                                                                                                                                                                                                                                                                                                                                                                                                                                                                                                                                                                                                                                                                                                                                                                                                                                                                                                                                                                                                                                         |         |          |         |          |         |          |         |          |         |          |                                                                                                                                                                                                                        |                                                                                                                                                                                                                                                                                                                                                                                                                                                                                                                                                                                                                                                                                                                                                                                                                                                                                                                                                                                                                                                                                                                                                                                                                                                                                                                                                                                                                                                                                                                                                                                                                                                                                                                                                                                                                                                                                                                                                                                                                                                                                                                                                                                                                                                                                                                                                                                                                                                                                                                                                                                                                                                                                                                                                                                                                                                                                                                                                                                                                                                                                                                                                           |   |         |         |          |   |          |         |          |   |          |         |          |   |         |         |          |   |          |         |          |   |          |         |          |   |         |          |          |   |         |         |          |   |         |         |         |   |          |         |          |   |         |          |         |   |         |          |         |   |         |         |         |   |          |          |         |   |          |          |         |   |         |         |         |   |         |         |         |   |          |          |          |   |         |          |          |   |         |          |          |   |          |          |          |   |          |          |          |   |          |          |          |   |          |          |          |   |          |          |          |   |          |          |          |   |          |          |          |   |          |          |          |   |          |          |          |   |          |          |          |   |          |          |         |   |          |          |          |   |          |          |         |   |          |          |         |   |          |          |         |   |          |          |         |   |          |          |         |   |          |          |          |   |          |          |         |   |          |         |         |   |          |         |         |   |          |         |          |   |          |         |         |
| C                                                                                                                                                                                                                      | -1.43320                                                                                                                                                                                                                                                                                                                                                                                                                                                                                                                                                                                                                                                                                                                                                                                                                                                                                                                                                                                                                                                                                                                                                                                                                                                                                                                                                                                                                                                                                                                                                                                                                                                                                                                                                                                                                                                                                                                                                                                                                                                                                                                                                                                                                                                                                                                                                                                                                                                                                                                                                                                                                                                                                                                                                                                                                                                                                                                                                                                                                                                                                                                                           | -1.25145 | -3.50663 |         |          |   |         |         |          |   |         |         |         |   |         |          |          |   |         |         |          |   |         |         |          |   |         |          |          |   |         |         |          |   |         |         |         |   |         |          |          |   |         |         |         |   |         |         |         |   |         |         |         |   |          |         |         |   |          |         |         |   |         |         |         |   |         |         |         |   |          |          |         |   |         |          |         |   |         |         |         |   |         |          |          |   |         |          |          |   |         |          |          |   |         |          |          |   |         |          |          |   |         |          |          |   |          |          |          |   |          |          |          |   |          |          |          |   |          |          |          |   |          |         |         |   |          |         |         |   |          |         |         |   |          |         |         |   |          |         |         |   |          |          |         |   |          |          |          |   |          |          |         |   |          |          |         |   |          |          |         |                                                                                                                                                                                                                      |                                                                                                                                                                                                                                                                                                                                                                                                                                                                                                                                                                                                                                                                                                                                                                                                                                                                                                                                                                                                                                                                                                                                                                                                                                                                                                                                                                                                                                                                                                                                                                                                                                                                                                                                                                                                                                                                                                                                                                                                                                                                                                                                                                                                                                                                                                                                                                                                                                                                                                                                                                                                                                                                                                                                                                                                                                                                                                                                         |         |          |         |          |         |          |         |          |         |          |                                                                                                                                                                                                                        |                                                                                                                                                                                                                                                                                                                                                                                                                                                                                                                                                                                                                                                                                                                                                                                                                                                                                                                                                                                                                                                                                                                                                                                                                                                                                                                                                                                                                                                                                                                                                                                                                                                                                                                                                                                                                                                                                                                                                                                                                                                                                                                                                                                                                                                                                                                                                                                                                                                                                                                                                                                                                                                                                                                                                                                                                                                                                                                                                                                                                                                                                                                                                           |   |         |         |          |   |          |         |          |   |          |         |          |   |         |         |          |   |          |         |          |   |          |         |          |   |         |          |          |   |         |         |          |   |         |         |         |   |          |         |          |   |         |          |         |   |         |          |         |   |         |         |         |   |          |          |         |   |          |          |         |   |         |         |         |   |         |         |         |   |          |          |          |   |         |          |          |   |         |          |          |   |          |          |          |   |          |          |          |   |          |          |          |   |          |          |          |   |          |          |          |   |          |          |          |   |          |          |          |   |          |          |          |   |          |          |          |   |          |          |          |   |          |          |         |   |          |          |          |   |          |          |         |   |          |          |         |   |          |          |         |   |          |          |         |   |          |          |         |   |          |          |          |   |          |          |         |   |          |         |         |   |          |         |         |   |          |         |          |   |          |         |         |
| H                                                                                                                                                                                                                      | -1.92239                                                                                                                                                                                                                                                                                                                                                                                                                                                                                                                                                                                                                                                                                                                                                                                                                                                                                                                                                                                                                                                                                                                                                                                                                                                                                                                                                                                                                                                                                                                                                                                                                                                                                                                                                                                                                                                                                                                                                                                                                                                                                                                                                                                                                                                                                                                                                                                                                                                                                                                                                                                                                                                                                                                                                                                                                                                                                                                                                                                                                                                                                                                                           | -1.29480 | -2.53107 |         |          |   |         |         |          |   |         |         |         |   |         |          |          |   |         |         |          |   |         |         |          |   |         |          |          |   |         |         |          |   |         |         |         |   |         |          |          |   |         |         |         |   |         |         |         |   |         |         |         |   |          |         |         |   |          |         |         |   |         |         |         |   |         |         |         |   |          |          |         |   |         |          |         |   |         |         |         |   |         |          |          |   |         |          |          |   |         |          |          |   |         |          |          |   |         |          |          |   |         |          |          |   |          |          |          |   |          |          |          |   |          |          |          |   |          |          |          |   |          |         |         |   |          |         |         |   |          |         |         |   |          |         |         |   |          |         |         |   |          |          |         |   |          |          |          |   |          |          |         |   |          |          |         |   |          |          |         |                                                                                                                                                                                                                      |                                                                                                                                                                                                                                                                                                                                                                                                                                                                                                                                                                                                                                                                                                                                                                                                                                                                                                                                                                                                                                                                                                                                                                                                                                                                                                                                                                                                                                                                                                                                                                                                                                                                                                                                                                                                                                                                                                                                                                                                                                                                                                                                                                                                                                                                                                                                                                                                                                                                                                                                                                                                                                                                                                                                                                                                                                                                                                                                         |         |          |         |          |         |          |         |          |         |          |                                                                                                                                                                                                                        |                                                                                                                                                                                                                                                                                                                                                                                                                                                                                                                                                                                                                                                                                                                                                                                                                                                                                                                                                                                                                                                                                                                                                                                                                                                                                                                                                                                                                                                                                                                                                                                                                                                                                                                                                                                                                                                                                                                                                                                                                                                                                                                                                                                                                                                                                                                                                                                                                                                                                                                                                                                                                                                                                                                                                                                                                                                                                                                                                                                                                                                                                                                                                           |   |         |         |          |   |          |         |          |   |          |         |          |   |         |         |          |   |          |         |          |   |          |         |          |   |         |          |          |   |         |         |          |   |         |         |         |   |          |         |          |   |         |          |         |   |         |          |         |   |         |         |         |   |          |          |         |   |          |          |         |   |         |         |         |   |         |         |         |   |          |          |          |   |         |          |          |   |         |          |          |   |          |          |          |   |          |          |          |   |          |          |          |   |          |          |          |   |          |          |          |   |          |          |          |   |          |          |          |   |          |          |          |   |          |          |          |   |          |          |          |   |          |          |         |   |          |          |          |   |          |          |         |   |          |          |         |   |          |          |         |   |          |          |         |   |          |          |         |   |          |          |          |   |          |          |         |   |          |         |         |   |          |         |         |   |          |         |          |   |          |         |         |
| H                                                                                                                                                                                                                      | -0.82716                                                                                                                                                                                                                                                                                                                                                                                                                                                                                                                                                                                                                                                                                                                                                                                                                                                                                                                                                                                                                                                                                                                                                                                                                                                                                                                                                                                                                                                                                                                                                                                                                                                                                                                                                                                                                                                                                                                                                                                                                                                                                                                                                                                                                                                                                                                                                                                                                                                                                                                                                                                                                                                                                                                                                                                                                                                                                                                                                                                                                                                                                                                                           | -2.15238 | -3.61955 |         |          |   |         |         |          |   |         |         |         |   |         |          |          |   |         |         |          |   |         |         |          |   |         |          |          |   |         |         |          |   |         |         |         |   |         |          |          |   |         |         |         |   |         |         |         |   |         |         |         |   |          |         |         |   |          |         |         |   |         |         |         |   |         |         |         |   |          |          |         |   |         |          |         |   |         |         |         |   |         |          |          |   |         |          |          |   |         |          |          |   |         |          |          |   |         |          |          |   |         |          |          |   |          |          |          |   |          |          |          |   |          |          |          |   |          |          |          |   |          |         |         |   |          |         |         |   |          |         |         |   |          |         |         |   |          |         |         |   |          |          |         |   |          |          |          |   |          |          |         |   |          |          |         |   |          |          |         |                                                                                                                                                                                                                      |                                                                                                                                                                                                                                                                                                                                                                                                                                                                                                                                                                                                                                                                                                                                                                                                                                                                                                                                                                                                                                                                                                                                                                                                                                                                                                                                                                                                                                                                                                                                                                                                                                                                                                                                                                                                                                                                                                                                                                                                                                                                                                                                                                                                                                                                                                                                                                                                                                                                                                                                                                                                                                                                                                                                                                                                                                                                                                                                         |         |          |         |          |         |          |         |          |         |          |                                                                                                                                                                                                                        |                                                                                                                                                                                                                                                                                                                                                                                                                                                                                                                                                                                                                                                                                                                                                                                                                                                                                                                                                                                                                                                                                                                                                                                                                                                                                                                                                                                                                                                                                                                                                                                                                                                                                                                                                                                                                                                                                                                                                                                                                                                                                                                                                                                                                                                                                                                                                                                                                                                                                                                                                                                                                                                                                                                                                                                                                                                                                                                                                                                                                                                                                                                                                           |   |         |         |          |   |          |         |          |   |          |         |          |   |         |         |          |   |          |         |          |   |          |         |          |   |         |          |          |   |         |         |          |   |         |         |         |   |          |         |          |   |         |          |         |   |         |          |         |   |         |         |         |   |          |          |         |   |          |          |         |   |         |         |         |   |         |         |         |   |          |          |          |   |         |          |          |   |         |          |          |   |          |          |          |   |          |          |          |   |          |          |          |   |          |          |          |   |          |          |          |   |          |          |          |   |          |          |          |   |          |          |          |   |          |          |          |   |          |          |          |   |          |          |         |   |          |          |          |   |          |          |         |   |          |          |         |   |          |          |         |   |          |          |         |   |          |          |         |   |          |          |          |   |          |          |         |   |          |         |         |   |          |         |         |   |          |         |          |   |          |         |         |
| H                                                                                                                                                                                                                      | -2.20891                                                                                                                                                                                                                                                                                                                                                                                                                                                                                                                                                                                                                                                                                                                                                                                                                                                                                                                                                                                                                                                                                                                                                                                                                                                                                                                                                                                                                                                                                                                                                                                                                                                                                                                                                                                                                                                                                                                                                                                                                                                                                                                                                                                                                                                                                                                                                                                                                                                                                                                                                                                                                                                                                                                                                                                                                                                                                                                                                                                                                                                                                                                                           | -1.25305 | -4.27615 |         |          |   |         |         |          |   |         |         |         |   |         |          |          |   |         |         |          |   |         |         |          |   |         |          |          |   |         |         |          |   |         |         |         |   |         |          |          |   |         |         |         |   |         |         |         |   |         |         |         |   |          |         |         |   |          |         |         |   |         |         |         |   |         |         |         |   |          |          |         |   |         |          |         |   |         |         |         |   |         |          |          |   |         |          |          |   |         |          |          |   |         |          |          |   |         |          |          |   |         |          |          |   |          |          |          |   |          |          |          |   |          |          |          |   |          |          |          |   |          |         |         |   |          |         |         |   |          |         |         |   |          |         |         |   |          |         |         |   |          |          |         |   |          |          |          |   |          |          |         |   |          |          |         |   |          |          |         |                                                                                                                                                                                                                      |                                                                                                                                                                                                                                                                                                                                                                                                                                                                                                                                                                                                                                                                                                                                                                                                                                                                                                                                                                                                                                                                                                                                                                                                                                                                                                                                                                                                                                                                                                                                                                                                                                                                                                                                                                                                                                                                                                                                                                                                                                                                                                                                                                                                                                                                                                                                                                                                                                                                                                                                                                                                                                                                                                                                                                                                                                                                                                                                         |         |          |         |          |         |          |         |          |         |          |                                                                                                                                                                                                                        |                                                                                                                                                                                                                                                                                                                                                                                                                                                                                                                                                                                                                                                                                                                                                                                                                                                                                                                                                                                                                                                                                                                                                                                                                                                                                                                                                                                                                                                                                                                                                                                                                                                                                                                                                                                                                                                                                                                                                                                                                                                                                                                                                                                                                                                                                                                                                                                                                                                                                                                                                                                                                                                                                                                                                                                                                                                                                                                                                                                                                                                                                                                                                           |   |         |         |          |   |          |         |          |   |          |         |          |   |         |         |          |   |          |         |          |   |          |         |          |   |         |          |          |   |         |         |          |   |         |         |         |   |          |         |          |   |         |          |         |   |         |          |         |   |         |         |         |   |          |          |         |   |          |          |         |   |         |         |         |   |         |         |         |   |          |          |          |   |         |          |          |   |         |          |          |   |          |          |          |   |          |          |          |   |          |          |          |   |          |          |          |   |          |          |          |   |          |          |          |   |          |          |          |   |          |          |          |   |          |          |          |   |          |          |          |   |          |          |         |   |          |          |          |   |          |          |         |   |          |          |         |   |          |          |         |   |          |          |         |   |          |          |         |   |          |          |          |   |          |          |         |   |          |         |         |   |          |         |         |   |          |         |          |   |          |         |         |
| C                                                                                                                                                                                                                      | -1.44502                                                                                                                                                                                                                                                                                                                                                                                                                                                                                                                                                                                                                                                                                                                                                                                                                                                                                                                                                                                                                                                                                                                                                                                                                                                                                                                                                                                                                                                                                                                                                                                                                                                                                                                                                                                                                                                                                                                                                                                                                                                                                                                                                                                                                                                                                                                                                                                                                                                                                                                                                                                                                                                                                                                                                                                                                                                                                                                                                                                                                                                                                                                                           | 1.26787  | -3.49902 |         |          |   |         |         |          |   |         |         |         |   |         |          |          |   |         |         |          |   |         |         |          |   |         |          |          |   |         |         |          |   |         |         |         |   |         |          |          |   |         |         |         |   |         |         |         |   |         |         |         |   |          |         |         |   |          |         |         |   |         |         |         |   |         |         |         |   |          |          |         |   |         |          |         |   |         |         |         |   |         |          |          |   |         |          |          |   |         |          |          |   |         |          |          |   |         |          |          |   |         |          |          |   |          |          |          |   |          |          |          |   |          |          |          |   |          |          |          |   |          |         |         |   |          |         |         |   |          |         |         |   |          |         |         |   |          |         |         |   |          |          |         |   |          |          |          |   |          |          |         |   |          |          |         |   |          |          |         |                                                                                                                                                                                                                      |                                                                                                                                                                                                                                                                                                                                                                                                                                                                                                                                                                                                                                                                                                                                                                                                                                                                                                                                                                                                                                                                                                                                                                                                                                                                                                                                                                                                                                                                                                                                                                                                                                                                                                                                                                                                                                                                                                                                                                                                                                                                                                                                                                                                                                                                                                                                                                                                                                                                                                                                                                                                                                                                                                                                                                                                                                                                                                                                         |         |          |         |          |         |          |         |          |         |          |                                                                                                                                                                                                                        |                                                                                                                                                                                                                                                                                                                                                                                                                                                                                                                                                                                                                                                                                                                                                                                                                                                                                                                                                                                                                                                                                                                                                                                                                                                                                                                                                                                                                                                                                                                                                                                                                                                                                                                                                                                                                                                                                                                                                                                                                                                                                                                                                                                                                                                                                                                                                                                                                                                                                                                                                                                                                                                                                                                                                                                                                                                                                                                                                                                                                                                                                                                                                           |   |         |         |          |   |          |         |          |   |          |         |          |   |         |         |          |   |          |         |          |   |          |         |          |   |         |          |          |   |         |         |          |   |         |         |         |   |          |         |          |   |         |          |         |   |         |          |         |   |         |         |         |   |          |          |         |   |          |          |         |   |         |         |         |   |         |         |         |   |          |          |          |   |         |          |          |   |         |          |          |   |          |          |          |   |          |          |          |   |          |          |          |   |          |          |          |   |          |          |          |   |          |          |          |   |          |          |          |   |          |          |          |   |          |          |          |   |          |          |          |   |          |          |         |   |          |          |          |   |          |          |         |   |          |          |         |   |          |          |         |   |          |          |         |   |          |          |         |   |          |          |          |   |          |          |         |   |          |         |         |   |          |         |         |   |          |         |          |   |          |         |         |
| H                                                                                                                                                                                                                      | -1.93422                                                                                                                                                                                                                                                                                                                                                                                                                                                                                                                                                                                                                                                                                                                                                                                                                                                                                                                                                                                                                                                                                                                                                                                                                                                                                                                                                                                                                                                                                                                                                                                                                                                                                                                                                                                                                                                                                                                                                                                                                                                                                                                                                                                                                                                                                                                                                                                                                                                                                                                                                                                                                                                                                                                                                                                                                                                                                                                                                                                                                                                                                                                                           | 1.30076  | -2.52304 |         |          |   |         |         |          |   |         |         |         |   |         |          |          |   |         |         |          |   |         |         |          |   |         |          |          |   |         |         |          |   |         |         |         |   |         |          |          |   |         |         |         |   |         |         |         |   |         |         |         |   |          |         |         |   |          |         |         |   |         |         |         |   |         |         |         |   |          |          |         |   |         |          |         |   |         |         |         |   |         |          |          |   |         |          |          |   |         |          |          |   |         |          |          |   |         |          |          |   |         |          |          |   |          |          |          |   |          |          |          |   |          |          |          |   |          |          |          |   |          |         |         |   |          |         |         |   |          |         |         |   |          |         |         |   |          |         |         |   |          |          |         |   |          |          |          |   |          |          |         |   |          |          |         |   |          |          |         |                                                                                                                                                                                                                      |                                                                                                                                                                                                                                                                                                                                                                                                                                                                                                                                                                                                                                                                                                                                                                                                                                                                                                                                                                                                                                                                                                                                                                                                                                                                                                                                                                                                                                                                                                                                                                                                                                                                                                                                                                                                                                                                                                                                                                                                                                                                                                                                                                                                                                                                                                                                                                                                                                                                                                                                                                                                                                                                                                                                                                                                                                                                                                                                         |         |          |         |          |         |          |         |          |         |          |                                                                                                                                                                                                                        |                                                                                                                                                                                                                                                                                                                                                                                                                                                                                                                                                                                                                                                                                                                                                                                                                                                                                                                                                                                                                                                                                                                                                                                                                                                                                                                                                                                                                                                                                                                                                                                                                                                                                                                                                                                                                                                                                                                                                                                                                                                                                                                                                                                                                                                                                                                                                                                                                                                                                                                                                                                                                                                                                                                                                                                                                                                                                                                                                                                                                                                                                                                                                           |   |         |         |          |   |          |         |          |   |          |         |          |   |         |         |          |   |          |         |          |   |          |         |          |   |         |          |          |   |         |         |          |   |         |         |         |   |          |         |          |   |         |          |         |   |         |          |         |   |         |         |         |   |          |          |         |   |          |          |         |   |         |         |         |   |         |         |         |   |          |          |          |   |         |          |          |   |         |          |          |   |          |          |          |   |          |          |          |   |          |          |          |   |          |          |          |   |          |          |          |   |          |          |          |   |          |          |          |   |          |          |          |   |          |          |          |   |          |          |          |   |          |          |         |   |          |          |          |   |          |          |         |   |          |          |         |   |          |          |         |   |          |          |         |   |          |          |         |   |          |          |          |   |          |          |         |   |          |         |         |   |          |         |         |   |          |         |          |   |          |         |         |
| H                                                                                                                                                                                                                      | -2.22092                                                                                                                                                                                                                                                                                                                                                                                                                                                                                                                                                                                                                                                                                                                                                                                                                                                                                                                                                                                                                                                                                                                                                                                                                                                                                                                                                                                                                                                                                                                                                                                                                                                                                                                                                                                                                                                                                                                                                                                                                                                                                                                                                                                                                                                                                                                                                                                                                                                                                                                                                                                                                                                                                                                                                                                                                                                                                                                                                                                                                                                                                                                                           | 1.26687  | -4.26834 |         |          |   |         |         |          |   |         |         |         |   |         |          |          |   |         |         |          |   |         |         |          |   |         |          |          |   |         |         |          |   |         |         |         |   |         |          |          |   |         |         |         |   |         |         |         |   |         |         |         |   |          |         |         |   |          |         |         |   |         |         |         |   |         |         |         |   |          |          |         |   |         |          |         |   |         |         |         |   |         |          |          |   |         |          |          |   |         |          |          |   |         |          |          |   |         |          |          |   |         |          |          |   |          |          |          |   |          |          |          |   |          |          |          |   |          |          |          |   |          |         |         |   |          |         |         |   |          |         |         |   |          |         |         |   |          |         |         |   |          |          |         |   |          |          |          |   |          |          |         |   |          |          |         |   |          |          |         |                                                                                                                                                                                                                      |                                                                                                                                                                                                                                                                                                                                                                                                                                                                                                                                                                                                                                                                                                                                                                                                                                                                                                                                                                                                                                                                                                                                                                                                                                                                                                                                                                                                                                                                                                                                                                                                                                                                                                                                                                                                                                                                                                                                                                                                                                                                                                                                                                                                                                                                                                                                                                                                                                                                                                                                                                                                                                                                                                                                                                                                                                                                                                                                         |         |          |         |          |         |          |         |          |         |          |                                                                                                                                                                                                                        |                                                                                                                                                                                                                                                                                                                                                                                                                                                                                                                                                                                                                                                                                                                                                                                                                                                                                                                                                                                                                                                                                                                                                                                                                                                                                                                                                                                                                                                                                                                                                                                                                                                                                                                                                                                                                                                                                                                                                                                                                                                                                                                                                                                                                                                                                                                                                                                                                                                                                                                                                                                                                                                                                                                                                                                                                                                                                                                                                                                                                                                                                                                                                           |   |         |         |          |   |          |         |          |   |          |         |          |   |         |         |          |   |          |         |          |   |          |         |          |   |         |          |          |   |         |         |          |   |         |         |         |   |          |         |          |   |         |          |         |   |         |          |         |   |         |         |         |   |          |          |         |   |          |          |         |   |         |         |         |   |         |         |         |   |          |          |          |   |         |          |          |   |         |          |          |   |          |          |          |   |          |          |          |   |          |          |          |   |          |          |          |   |          |          |          |   |          |          |          |   |          |          |          |   |          |          |          |   |          |          |          |   |          |          |          |   |          |          |         |   |          |          |          |   |          |          |         |   |          |          |         |   |          |          |         |   |          |          |         |   |          |          |         |   |          |          |          |   |          |          |         |   |          |         |         |   |          |         |         |   |          |         |          |   |          |         |         |
| H                                                                                                                                                                                                                      | -0.84740                                                                                                                                                                                                                                                                                                                                                                                                                                                                                                                                                                                                                                                                                                                                                                                                                                                                                                                                                                                                                                                                                                                                                                                                                                                                                                                                                                                                                                                                                                                                                                                                                                                                                                                                                                                                                                                                                                                                                                                                                                                                                                                                                                                                                                                                                                                                                                                                                                                                                                                                                                                                                                                                                                                                                                                                                                                                                                                                                                                                                                                                                                                                           | 2.17506  | -3.60666 |         |          |   |         |         |          |   |         |         |         |   |         |          |          |   |         |         |          |   |         |         |          |   |         |          |          |   |         |         |          |   |         |         |         |   |         |          |          |   |         |         |         |   |         |         |         |   |         |         |         |   |          |         |         |   |          |         |         |   |         |         |         |   |         |         |         |   |          |          |         |   |         |          |         |   |         |         |         |   |         |          |          |   |         |          |          |   |         |          |          |   |         |          |          |   |         |          |          |   |         |          |          |   |          |          |          |   |          |          |          |   |          |          |          |   |          |          |          |   |          |         |         |   |          |         |         |   |          |         |         |   |          |         |         |   |          |         |         |   |          |          |         |   |          |          |          |   |          |          |         |   |          |          |         |   |          |          |         |                                                                                                                                                                                                                      |                                                                                                                                                                                                                                                                                                                                                                                                                                                                                                                                                                                                                                                                                                                                                                                                                                                                                                                                                                                                                                                                                                                                                                                                                                                                                                                                                                                                                                                                                                                                                                                                                                                                                                                                                                                                                                                                                                                                                                                                                                                                                                                                                                                                                                                                                                                                                                                                                                                                                                                                                                                                                                                                                                                                                                                                                                                                                                                                         |         |          |         |          |         |          |         |          |         |          |                                                                                                                                                                                                                        |                                                                                                                                                                                                                                                                                                                                                                                                                                                                                                                                                                                                                                                                                                                                                                                                                                                                                                                                                                                                                                                                                                                                                                                                                                                                                                                                                                                                                                                                                                                                                                                                                                                                                                                                                                                                                                                                                                                                                                                                                                                                                                                                                                                                                                                                                                                                                                                                                                                                                                                                                                                                                                                                                                                                                                                                                                                                                                                                                                                                                                                                                                                                                           |   |         |         |          |   |          |         |          |   |          |         |          |   |         |         |          |   |          |         |          |   |          |         |          |   |         |          |          |   |         |         |          |   |         |         |         |   |          |         |          |   |         |          |         |   |         |          |         |   |         |         |         |   |          |          |         |   |          |          |         |   |         |         |         |   |         |         |         |   |          |          |          |   |         |          |          |   |         |          |          |   |          |          |          |   |          |          |          |   |          |          |          |   |          |          |          |   |          |          |          |   |          |          |          |   |          |          |          |   |          |          |          |   |          |          |          |   |          |          |          |   |          |          |         |   |          |          |          |   |          |          |         |   |          |          |         |   |          |          |         |   |          |          |         |   |          |          |         |   |          |          |          |   |          |          |         |   |          |         |         |   |          |         |         |   |          |         |          |   |          |         |         |
| C                                                                                                                                                                                                                      | -1.80128                                                                                                                                                                                                                                                                                                                                                                                                                                                                                                                                                                                                                                                                                                                                                                                                                                                                                                                                                                                                                                                                                                                                                                                                                                                                                                                                                                                                                                                                                                                                                                                                                                                                                                                                                                                                                                                                                                                                                                                                                                                                                                                                                                                                                                                                                                                                                                                                                                                                                                                                                                                                                                                                                                                                                                                                                                                                                                                                                                                                                                                                                                                                           | -0.01370 | 1.27579  |         |          |   |         |         |          |   |         |         |         |   |         |          |          |   |         |         |          |   |         |         |          |   |         |          |          |   |         |         |          |   |         |         |         |   |         |          |          |   |         |         |         |   |         |         |         |   |         |         |         |   |          |         |         |   |          |         |         |   |         |         |         |   |         |         |         |   |          |          |         |   |         |          |         |   |         |         |         |   |         |          |          |   |         |          |          |   |         |          |          |   |         |          |          |   |         |          |          |   |         |          |          |   |          |          |          |   |          |          |          |   |          |          |          |   |          |          |          |   |          |         |         |   |          |         |         |   |          |         |         |   |          |         |         |   |          |         |         |   |          |          |         |   |          |          |          |   |          |          |         |   |          |          |         |   |          |          |         |                                                                                                                                                                                                                      |                                                                                                                                                                                                                                                                                                                                                                                                                                                                                                                                                                                                                                                                                                                                                                                                                                                                                                                                                                                                                                                                                                                                                                                                                                                                                                                                                                                                                                                                                                                                                                                                                                                                                                                                                                                                                                                                                                                                                                                                                                                                                                                                                                                                                                                                                                                                                                                                                                                                                                                                                                                                                                                                                                                                                                                                                                                                                                                                         |         |          |         |          |         |          |         |          |         |          |                                                                                                                                                                                                                        |                                                                                                                                                                                                                                                                                                                                                                                                                                                                                                                                                                                                                                                                                                                                                                                                                                                                                                                                                                                                                                                                                                                                                                                                                                                                                                                                                                                                                                                                                                                                                                                                                                                                                                                                                                                                                                                                                                                                                                                                                                                                                                                                                                                                                                                                                                                                                                                                                                                                                                                                                                                                                                                                                                                                                                                                                                                                                                                                                                                                                                                                                                                                                           |   |         |         |          |   |          |         |          |   |          |         |          |   |         |         |          |   |          |         |          |   |          |         |          |   |         |          |          |   |         |         |          |   |         |         |         |   |          |         |          |   |         |          |         |   |         |          |         |   |         |         |         |   |          |          |         |   |          |          |         |   |         |         |         |   |         |         |         |   |          |          |          |   |         |          |          |   |         |          |          |   |          |          |          |   |          |          |          |   |          |          |          |   |          |          |          |   |          |          |          |   |          |          |          |   |          |          |          |   |          |          |          |   |          |          |          |   |          |          |          |   |          |          |         |   |          |          |          |   |          |          |         |   |          |          |         |   |          |          |         |   |          |          |         |   |          |          |         |   |          |          |          |   |          |          |         |   |          |         |         |   |          |         |         |   |          |         |          |   |          |         |         |
| C                                                                                                                                                                                                                      | -2.99676                                                                                                                                                                                                                                                                                                                                                                                                                                                                                                                                                                                                                                                                                                                                                                                                                                                                                                                                                                                                                                                                                                                                                                                                                                                                                                                                                                                                                                                                                                                                                                                                                                                                                                                                                                                                                                                                                                                                                                                                                                                                                                                                                                                                                                                                                                                                                                                                                                                                                                                                                                                                                                                                                                                                                                                                                                                                                                                                                                                                                                                                                                                                           | -0.02488 | 2.25569  |         |          |   |         |         |          |   |         |         |         |   |         |          |          |   |         |         |          |   |         |         |          |   |         |          |          |   |         |         |          |   |         |         |         |   |         |          |          |   |         |         |         |   |         |         |         |   |         |         |         |   |          |         |         |   |          |         |         |   |         |         |         |   |         |         |         |   |          |          |         |   |         |          |         |   |         |         |         |   |         |          |          |   |         |          |          |   |         |          |          |   |         |          |          |   |         |          |          |   |         |          |          |   |          |          |          |   |          |          |          |   |          |          |          |   |          |          |          |   |          |         |         |   |          |         |         |   |          |         |         |   |          |         |         |   |          |         |         |   |          |          |         |   |          |          |          |   |          |          |         |   |          |          |         |   |          |          |         |                                                                                                                                                                                                                      |                                                                                                                                                                                                                                                                                                                                                                                                                                                                                                                                                                                                                                                                                                                                                                                                                                                                                                                                                                                                                                                                                                                                                                                                                                                                                                                                                                                                                                                                                                                                                                                                                                                                                                                                                                                                                                                                                                                                                                                                                                                                                                                                                                                                                                                                                                                                                                                                                                                                                                                                                                                                                                                                                                                                                                                                                                                                                                                                         |         |          |         |          |         |          |         |          |         |          |                                                                                                                                                                                                                        |                                                                                                                                                                                                                                                                                                                                                                                                                                                                                                                                                                                                                                                                                                                                                                                                                                                                                                                                                                                                                                                                                                                                                                                                                                                                                                                                                                                                                                                                                                                                                                                                                                                                                                                                                                                                                                                                                                                                                                                                                                                                                                                                                                                                                                                                                                                                                                                                                                                                                                                                                                                                                                                                                                                                                                                                                                                                                                                                                                                                                                                                                                                                                           |   |         |         |          |   |          |         |          |   |          |         |          |   |         |         |          |   |          |         |          |   |          |         |          |   |         |          |          |   |         |         |          |   |         |         |         |   |          |         |          |   |         |          |         |   |         |          |         |   |         |         |         |   |          |          |         |   |          |          |         |   |         |         |         |   |         |         |         |   |          |          |          |   |         |          |          |   |         |          |          |   |          |          |          |   |          |          |          |   |          |          |          |   |          |          |          |   |          |          |          |   |          |          |          |   |          |          |          |   |          |          |          |   |          |          |          |   |          |          |          |   |          |          |         |   |          |          |          |   |          |          |         |   |          |          |         |   |          |          |         |   |          |          |         |   |          |          |         |   |          |          |          |   |          |          |         |   |          |         |         |   |          |         |         |   |          |         |          |   |          |         |         |
| H                                                                                                                                                                                                                      | -3.00392                                                                                                                                                                                                                                                                                                                                                                                                                                                                                                                                                                                                                                                                                                                                                                                                                                                                                                                                                                                                                                                                                                                                                                                                                                                                                                                                                                                                                                                                                                                                                                                                                                                                                                                                                                                                                                                                                                                                                                                                                                                                                                                                                                                                                                                                                                                                                                                                                                                                                                                                                                                                                                                                                                                                                                                                                                                                                                                                                                                                                                                                                                                                           | -0.91533 | 2.88583  |         |          |   |         |         |          |   |         |         |         |   |         |          |          |   |         |         |          |   |         |         |          |   |         |          |          |   |         |         |          |   |         |         |         |   |         |          |          |   |         |         |         |   |         |         |         |   |         |         |         |   |          |         |         |   |          |         |         |   |         |         |         |   |         |         |         |   |          |          |         |   |         |          |         |   |         |         |         |   |         |          |          |   |         |          |          |   |         |          |          |   |         |          |          |   |         |          |          |   |         |          |          |   |          |          |          |   |          |          |          |   |          |          |          |   |          |          |          |   |          |         |         |   |          |         |         |   |          |         |         |   |          |         |         |   |          |         |         |   |          |          |         |   |          |          |          |   |          |          |         |   |          |          |         |   |          |          |         |                                                                                                                                                                                                                      |                                                                                                                                                                                                                                                                                                                                                                                                                                                                                                                                                                                                                                                                                                                                                                                                                                                                                                                                                                                                                                                                                                                                                                                                                                                                                                                                                                                                                                                                                                                                                                                                                                                                                                                                                                                                                                                                                                                                                                                                                                                                                                                                                                                                                                                                                                                                                                                                                                                                                                                                                                                                                                                                                                                                                                                                                                                                                                                                         |         |          |         |          |         |          |         |          |         |          |                                                                                                                                                                                                                        |                                                                                                                                                                                                                                                                                                                                                                                                                                                                                                                                                                                                                                                                                                                                                                                                                                                                                                                                                                                                                                                                                                                                                                                                                                                                                                                                                                                                                                                                                                                                                                                                                                                                                                                                                                                                                                                                                                                                                                                                                                                                                                                                                                                                                                                                                                                                                                                                                                                                                                                                                                                                                                                                                                                                                                                                                                                                                                                                                                                                                                                                                                                                                           |   |         |         |          |   |          |         |          |   |          |         |          |   |         |         |          |   |          |         |          |   |          |         |          |   |         |          |          |   |         |         |          |   |         |         |         |   |          |         |          |   |         |          |         |   |         |          |         |   |         |         |         |   |          |          |         |   |          |          |         |   |         |         |         |   |         |         |         |   |          |          |          |   |         |          |          |   |         |          |          |   |          |          |          |   |          |          |          |   |          |          |          |   |          |          |          |   |          |          |          |   |          |          |          |   |          |          |          |   |          |          |          |   |          |          |          |   |          |          |          |   |          |          |         |   |          |          |          |   |          |          |         |   |          |          |         |   |          |          |         |   |          |          |         |   |          |          |         |   |          |          |          |   |          |          |         |   |          |         |         |   |          |         |         |   |          |         |          |   |          |         |         |
| H                                                                                                                                                                                                                      | -3.91322                                                                                                                                                                                                                                                                                                                                                                                                                                                                                                                                                                                                                                                                                                                                                                                                                                                                                                                                                                                                                                                                                                                                                                                                                                                                                                                                                                                                                                                                                                                                                                                                                                                                                                                                                                                                                                                                                                                                                                                                                                                                                                                                                                                                                                                                                                                                                                                                                                                                                                                                                                                                                                                                                                                                                                                                                                                                                                                                                                                                                                                                                                                                           | -0.03013 | 1.66104  |         |          |   |         |         |          |   |         |         |         |   |         |          |          |   |         |         |          |   |         |         |          |   |         |          |          |   |         |         |          |   |         |         |         |   |         |          |          |   |         |         |         |   |         |         |         |   |         |         |         |   |          |         |         |   |          |         |         |   |         |         |         |   |         |         |         |   |          |          |         |   |         |          |         |   |         |         |         |   |         |          |          |   |         |          |          |   |         |          |          |   |         |          |          |   |         |          |          |   |         |          |          |   |          |          |          |   |          |          |          |   |          |          |          |   |          |          |          |   |          |         |         |   |          |         |         |   |          |         |         |   |          |         |         |   |          |         |         |   |          |          |         |   |          |          |          |   |          |          |         |   |          |          |         |   |          |          |         |                                                                                                                                                                                                                      |                                                                                                                                                                                                                                                                                                                                                                                                                                                                                                                                                                                                                                                                                                                                                                                                                                                                                                                                                                                                                                                                                                                                                                                                                                                                                                                                                                                                                                                                                                                                                                                                                                                                                                                                                                                                                                                                                                                                                                                                                                                                                                                                                                                                                                                                                                                                                                                                                                                                                                                                                                                                                                                                                                                                                                                                                                                                                                                                         |         |          |         |          |         |          |         |          |         |          |                                                                                                                                                                                                                        |                                                                                                                                                                                                                                                                                                                                                                                                                                                                                                                                                                                                                                                                                                                                                                                                                                                                                                                                                                                                                                                                                                                                                                                                                                                                                                                                                                                                                                                                                                                                                                                                                                                                                                                                                                                                                                                                                                                                                                                                                                                                                                                                                                                                                                                                                                                                                                                                                                                                                                                                                                                                                                                                                                                                                                                                                                                                                                                                                                                                                                                                                                                                                           |   |         |         |          |   |          |         |          |   |          |         |          |   |         |         |          |   |          |         |          |   |          |         |          |   |         |          |          |   |         |         |          |   |         |         |         |   |          |         |          |   |         |          |         |   |         |          |         |   |         |         |         |   |          |          |         |   |          |          |         |   |         |         |         |   |         |         |         |   |          |          |          |   |         |          |          |   |         |          |          |   |          |          |          |   |          |          |          |   |          |          |          |   |          |          |          |   |          |          |          |   |          |          |          |   |          |          |          |   |          |          |          |   |          |          |          |   |          |          |          |   |          |          |         |   |          |          |          |   |          |          |         |   |          |          |         |   |          |          |         |   |          |          |         |   |          |          |         |   |          |          |          |   |          |          |         |   |          |         |         |   |          |         |         |   |          |         |          |   |          |         |         |
| H                                                                                                                                                                                                                      | -3.01699                                                                                                                                                                                                                                                                                                                                                                                                                                                                                                                                                                                                                                                                                                                                                                                                                                                                                                                                                                                                                                                                                                                                                                                                                                                                                                                                                                                                                                                                                                                                                                                                                                                                                                                                                                                                                                                                                                                                                                                                                                                                                                                                                                                                                                                                                                                                                                                                                                                                                                                                                                                                                                                                                                                                                                                                                                                                                                                                                                                                                                                                                                                                           | 0.86226  | 2.89019  |         |          |   |         |         |          |   |         |         |         |   |         |          |          |   |         |         |          |   |         |         |          |   |         |          |          |   |         |         |          |   |         |         |         |   |         |          |          |   |         |         |         |   |         |         |         |   |         |         |         |   |          |         |         |   |          |         |         |   |         |         |         |   |         |         |         |   |          |          |         |   |         |          |         |   |         |         |         |   |         |          |          |   |         |          |          |   |         |          |          |   |         |          |          |   |         |          |          |   |         |          |          |   |          |          |          |   |          |          |          |   |          |          |          |   |          |          |          |   |          |         |         |   |          |         |         |   |          |         |         |   |          |         |         |   |          |         |         |   |          |          |         |   |          |          |          |   |          |          |         |   |          |          |         |   |          |          |         |                                                                                                                                                                                                                      |                                                                                                                                                                                                                                                                                                                                                                                                                                                                                                                                                                                                                                                                                                                                                                                                                                                                                                                                                                                                                                                                                                                                                                                                                                                                                                                                                                                                                                                                                                                                                                                                                                                                                                                                                                                                                                                                                                                                                                                                                                                                                                                                                                                                                                                                                                                                                                                                                                                                                                                                                                                                                                                                                                                                                                                                                                                                                                                                         |         |          |         |          |         |          |         |          |         |          |                                                                                                                                                                                                                        |                                                                                                                                                                                                                                                                                                                                                                                                                                                                                                                                                                                                                                                                                                                                                                                                                                                                                                                                                                                                                                                                                                                                                                                                                                                                                                                                                                                                                                                                                                                                                                                                                                                                                                                                                                                                                                                                                                                                                                                                                                                                                                                                                                                                                                                                                                                                                                                                                                                                                                                                                                                                                                                                                                                                                                                                                                                                                                                                                                                                                                                                                                                                                           |   |         |         |          |   |          |         |          |   |          |         |          |   |         |         |          |   |          |         |          |   |          |         |          |   |         |          |          |   |         |         |          |   |         |         |         |   |          |         |          |   |         |          |         |   |         |          |         |   |         |         |         |   |          |          |         |   |          |          |         |   |         |         |         |   |         |         |         |   |          |          |          |   |         |          |          |   |         |          |          |   |          |          |          |   |          |          |          |   |          |          |          |   |          |          |          |   |          |          |          |   |          |          |          |   |          |          |          |   |          |          |          |   |          |          |          |   |          |          |          |   |          |          |         |   |          |          |          |   |          |          |         |   |          |          |         |   |          |          |         |   |          |          |         |   |          |          |         |   |          |          |          |   |          |          |         |   |          |         |         |   |          |         |         |   |          |         |          |   |          |         |         |
| C                                                                                                                                                                                                                      | -1.97270                                                                                                                                                                                                                                                                                                                                                                                                                                                                                                                                                                                                                                                                                                                                                                                                                                                                                                                                                                                                                                                                                                                                                                                                                                                                                                                                                                                                                                                                                                                                                                                                                                                                                                                                                                                                                                                                                                                                                                                                                                                                                                                                                                                                                                                                                                                                                                                                                                                                                                                                                                                                                                                                                                                                                                                                                                                                                                                                                                                                                                                                                                                                           | -1.33248 | 0.46920  |         |          |   |         |         |          |   |         |         |         |   |         |          |          |   |         |         |          |   |         |         |          |   |         |          |          |   |         |         |          |   |         |         |         |   |         |          |          |   |         |         |         |   |         |         |         |   |         |         |         |   |          |         |         |   |          |         |         |   |         |         |         |   |         |         |         |   |          |          |         |   |         |          |         |   |         |         |         |   |         |          |          |   |         |          |          |   |         |          |          |   |         |          |          |   |         |          |          |   |         |          |          |   |          |          |          |   |          |          |          |   |          |          |          |   |          |          |          |   |          |         |         |   |          |         |         |   |          |         |         |   |          |         |         |   |          |         |         |   |          |          |         |   |          |          |          |   |          |          |         |   |          |          |         |   |          |          |         |                                                                                                                                                                                                                      |                                                                                                                                                                                                                                                                                                                                                                                                                                                                                                                                                                                                                                                                                                                                                                                                                                                                                                                                                                                                                                                                                                                                                                                                                                                                                                                                                                                                                                                                                                                                                                                                                                                                                                                                                                                                                                                                                                                                                                                                                                                                                                                                                                                                                                                                                                                                                                                                                                                                                                                                                                                                                                                                                                                                                                                                                                                                                                                                         |         |          |         |          |         |          |         |          |         |          |                                                                                                                                                                                                                        |                                                                                                                                                                                                                                                                                                                                                                                                                                                                                                                                                                                                                                                                                                                                                                                                                                                                                                                                                                                                                                                                                                                                                                                                                                                                                                                                                                                                                                                                                                                                                                                                                                                                                                                                                                                                                                                                                                                                                                                                                                                                                                                                                                                                                                                                                                                                                                                                                                                                                                                                                                                                                                                                                                                                                                                                                                                                                                                                                                                                                                                                                                                                                           |   |         |         |          |   |          |         |          |   |          |         |          |   |         |         |          |   |          |         |          |   |          |         |          |   |         |          |          |   |         |         |          |   |         |         |         |   |          |         |          |   |         |          |         |   |         |          |         |   |         |         |         |   |          |          |         |   |          |          |         |   |         |         |         |   |         |         |         |   |          |          |          |   |         |          |          |   |         |          |          |   |          |          |          |   |          |          |          |   |          |          |          |   |          |          |          |   |          |          |          |   |          |          |          |   |          |          |          |   |          |          |          |   |          |          |          |   |          |          |          |   |          |          |         |   |          |          |          |   |          |          |         |   |          |          |         |   |          |          |         |   |          |          |         |   |          |          |         |   |          |          |          |   |          |          |         |   |          |         |         |   |          |         |         |   |          |         |          |   |          |         |         |
| H                                                                                                                                                                                                                      | -1.05977                                                                                                                                                                                                                                                                                                                                                                                                                                                                                                                                                                                                                                                                                                                                                                                                                                                                                                                                                                                                                                                                                                                                                                                                                                                                                                                                                                                                                                                                                                                                                                                                                                                                                                                                                                                                                                                                                                                                                                                                                                                                                                                                                                                                                                                                                                                                                                                                                                                                                                                                                                                                                                                                                                                                                                                                                                                                                                                                                                                                                                                                                                                                           | -1.68827 | 0.00217  |         |          |   |         |         |          |   |         |         |         |   |         |          |          |   |         |         |          |   |         |         |          |   |         |          |          |   |         |         |          |   |         |         |         |   |         |          |          |   |         |         |         |   |         |         |         |   |         |         |         |   |          |         |         |   |          |         |         |   |         |         |         |   |         |         |         |   |          |          |         |   |         |          |         |   |         |         |         |   |         |          |          |   |         |          |          |   |         |          |          |   |         |          |          |   |         |          |          |   |         |          |          |   |          |          |          |   |          |          |          |   |          |          |          |   |          |          |          |   |          |         |         |   |          |         |         |   |          |         |         |   |          |         |         |   |          |         |         |   |          |          |         |   |          |          |          |   |          |          |         |   |          |          |         |   |          |          |         |                                                                                                                                                                                                                      |                                                                                                                                                                                                                                                                                                                                                                                                                                                                                                                                                                                                                                                                                                                                                                                                                                                                                                                                                                                                                                                                                                                                                                                                                                                                                                                                                                                                                                                                                                                                                                                                                                                                                                                                                                                                                                                                                                                                                                                                                                                                                                                                                                                                                                                                                                                                                                                                                                                                                                                                                                                                                                                                                                                                                                                                                                                                                                                                         |         |          |         |          |         |          |         |          |         |          |                                                                                                                                                                                                                        |                                                                                                                                                                                                                                                                                                                                                                                                                                                                                                                                                                                                                                                                                                                                                                                                                                                                                                                                                                                                                                                                                                                                                                                                                                                                                                                                                                                                                                                                                                                                                                                                                                                                                                                                                                                                                                                                                                                                                                                                                                                                                                                                                                                                                                                                                                                                                                                                                                                                                                                                                                                                                                                                                                                                                                                                                                                                                                                                                                                                                                                                                                                                                           |   |         |         |          |   |          |         |          |   |          |         |          |   |         |         |          |   |          |         |          |   |          |         |          |   |         |          |          |   |         |         |          |   |         |         |         |   |          |         |          |   |         |          |         |   |         |          |         |   |         |         |         |   |          |          |         |   |          |          |         |   |         |         |         |   |         |         |         |   |          |          |          |   |         |          |          |   |         |          |          |   |          |          |          |   |          |          |          |   |          |          |          |   |          |          |          |   |          |          |          |   |          |          |          |   |          |          |          |   |          |          |          |   |          |          |          |   |          |          |          |   |          |          |         |   |          |          |          |   |          |          |         |   |          |          |         |   |          |          |         |   |          |          |         |   |          |          |         |   |          |          |          |   |          |          |         |   |          |         |         |   |          |         |         |   |          |         |          |   |          |         |         |
| H                                                                                                                                                                                                                      | -2.73733                                                                                                                                                                                                                                                                                                                                                                                                                                                                                                                                                                                                                                                                                                                                                                                                                                                                                                                                                                                                                                                                                                                                                                                                                                                                                                                                                                                                                                                                                                                                                                                                                                                                                                                                                                                                                                                                                                                                                                                                                                                                                                                                                                                                                                                                                                                                                                                                                                                                                                                                                                                                                                                                                                                                                                                                                                                                                                                                                                                                                                                                                                                                           | -1.21315 | -0.30273 |         |          |   |         |         |          |   |         |         |         |   |         |          |          |   |         |         |          |   |         |         |          |   |         |          |          |   |         |         |          |   |         |         |         |   |         |          |          |   |         |         |         |   |         |         |         |   |         |         |         |   |          |         |         |   |          |         |         |   |         |         |         |   |         |         |         |   |          |          |         |   |         |          |         |   |         |         |         |   |         |          |          |   |         |          |          |   |         |          |          |   |         |          |          |   |         |          |          |   |         |          |          |   |          |          |          |   |          |          |          |   |          |          |          |   |          |          |          |   |          |         |         |   |          |         |         |   |          |         |         |   |          |         |         |   |          |         |         |   |          |          |         |   |          |          |          |   |          |          |         |   |          |          |         |   |          |          |         |                                                                                                                                                                                                                      |                                                                                                                                                                                                                                                                                                                                                                                                                                                                                                                                                                                                                                                                                                                                                                                                                                                                                                                                                                                                                                                                                                                                                                                                                                                                                                                                                                                                                                                                                                                                                                                                                                                                                                                                                                                                                                                                                                                                                                                                                                                                                                                                                                                                                                                                                                                                                                                                                                                                                                                                                                                                                                                                                                                                                                                                                                                                                                                                         |         |          |         |          |         |          |         |          |         |          |                                                                                                                                                                                                                        |                                                                                                                                                                                                                                                                                                                                                                                                                                                                                                                                                                                                                                                                                                                                                                                                                                                                                                                                                                                                                                                                                                                                                                                                                                                                                                                                                                                                                                                                                                                                                                                                                                                                                                                                                                                                                                                                                                                                                                                                                                                                                                                                                                                                                                                                                                                                                                                                                                                                                                                                                                                                                                                                                                                                                                                                                                                                                                                                                                                                                                                                                                                                                           |   |         |         |          |   |          |         |          |   |          |         |          |   |         |         |          |   |          |         |          |   |          |         |          |   |         |          |          |   |         |         |          |   |         |         |         |   |          |         |          |   |         |          |         |   |         |          |         |   |         |         |         |   |          |          |         |   |          |          |         |   |         |         |         |   |         |         |         |   |          |          |          |   |         |          |          |   |         |          |          |   |          |          |          |   |          |          |          |   |          |          |          |   |          |          |          |   |          |          |          |   |          |          |          |   |          |          |          |   |          |          |          |   |          |          |          |   |          |          |          |   |          |          |         |   |          |          |          |   |          |          |         |   |          |          |         |   |          |          |         |   |          |          |         |   |          |          |         |   |          |          |          |   |          |          |         |   |          |         |         |   |          |         |         |   |          |         |          |   |          |         |         |
| H                                                                                                                                                                                                                      | -2.30402                                                                                                                                                                                                                                                                                                                                                                                                                                                                                                                                                                                                                                                                                                                                                                                                                                                                                                                                                                                                                                                                                                                                                                                                                                                                                                                                                                                                                                                                                                                                                                                                                                                                                                                                                                                                                                                                                                                                                                                                                                                                                                                                                                                                                                                                                                                                                                                                                                                                                                                                                                                                                                                                                                                                                                                                                                                                                                                                                                                                                                                                                                                                           | -2.11896 | 1.14988  |         |          |   |         |         |          |   |         |         |         |   |         |          |          |   |         |         |          |   |         |         |          |   |         |          |          |   |         |         |          |   |         |         |         |   |         |          |          |   |         |         |         |   |         |         |         |   |         |         |         |   |          |         |         |   |          |         |         |   |         |         |         |   |         |         |         |   |          |          |         |   |         |          |         |   |         |         |         |   |         |          |          |   |         |          |          |   |         |          |          |   |         |          |          |   |         |          |          |   |         |          |          |   |          |          |          |   |          |          |          |   |          |          |          |   |          |          |          |   |          |         |         |   |          |         |         |   |          |         |         |   |          |         |         |   |          |         |         |   |          |          |         |   |          |          |          |   |          |          |         |   |          |          |         |   |          |          |         |                                                                                                                                                                                                                      |                                                                                                                                                                                                                                                                                                                                                                                                                                                                                                                                                                                                                                                                                                                                                                                                                                                                                                                                                                                                                                                                                                                                                                                                                                                                                                                                                                                                                                                                                                                                                                                                                                                                                                                                                                                                                                                                                                                                                                                                                                                                                                                                                                                                                                                                                                                                                                                                                                                                                                                                                                                                                                                                                                                                                                                                                                                                                                                                         |         |          |         |          |         |          |         |          |         |          |                                                                                                                                                                                                                        |                                                                                                                                                                                                                                                                                                                                                                                                                                                                                                                                                                                                                                                                                                                                                                                                                                                                                                                                                                                                                                                                                                                                                                                                                                                                                                                                                                                                                                                                                                                                                                                                                                                                                                                                                                                                                                                                                                                                                                                                                                                                                                                                                                                                                                                                                                                                                                                                                                                                                                                                                                                                                                                                                                                                                                                                                                                                                                                                                                                                                                                                                                                                                           |   |         |         |          |   |          |         |          |   |          |         |          |   |         |         |          |   |          |         |          |   |          |         |          |   |         |          |          |   |         |         |          |   |         |         |         |   |          |         |          |   |         |          |         |   |         |          |         |   |         |         |         |   |          |          |         |   |          |          |         |   |         |         |         |   |         |         |         |   |          |          |          |   |         |          |          |   |         |          |          |   |          |          |          |   |          |          |          |   |          |          |          |   |          |          |          |   |          |          |          |   |          |          |          |   |          |          |          |   |          |          |          |   |          |          |          |   |          |          |          |   |          |          |         |   |          |          |          |   |          |          |         |   |          |          |         |   |          |          |         |   |          |          |         |   |          |          |         |   |          |          |          |   |          |          |         |   |          |         |         |   |          |         |         |   |          |         |          |   |          |         |         |
| C                                                                                                                                                                                                                      | -1.99155                                                                                                                                                                                                                                                                                                                                                                                                                                                                                                                                                                                                                                                                                                                                                                                                                                                                                                                                                                                                                                                                                                                                                                                                                                                                                                                                                                                                                                                                                                                                                                                                                                                                                                                                                                                                                                                                                                                                                                                                                                                                                                                                                                                                                                                                                                                                                                                                                                                                                                                                                                                                                                                                                                                                                                                                                                                                                                                                                                                                                                                                                                                                           | 1.30674  | 0.47603  |         |          |   |         |         |          |   |         |         |         |   |         |          |          |   |         |         |          |   |         |         |          |   |         |          |          |   |         |         |          |   |         |         |         |   |         |          |          |   |         |         |         |   |         |         |         |   |         |         |         |   |          |         |         |   |          |         |         |   |         |         |         |   |         |         |         |   |          |          |         |   |         |          |         |   |         |         |         |   |         |          |          |   |         |          |          |   |         |          |          |   |         |          |          |   |         |          |          |   |         |          |          |   |          |          |          |   |          |          |          |   |          |          |          |   |          |          |          |   |          |         |         |   |          |         |         |   |          |         |         |   |          |         |         |   |          |         |         |   |          |          |         |   |          |          |          |   |          |          |         |   |          |          |         |   |          |          |         |                                                                                                                                                                                                                      |                                                                                                                                                                                                                                                                                                                                                                                                                                                                                                                                                                                                                                                                                                                                                                                                                                                                                                                                                                                                                                                                                                                                                                                                                                                                                                                                                                                                                                                                                                                                                                                                                                                                                                                                                                                                                                                                                                                                                                                                                                                                                                                                                                                                                                                                                                                                                                                                                                                                                                                                                                                                                                                                                                                                                                                                                                                                                                                                         |         |          |         |          |         |          |         |          |         |          |                                                                                                                                                                                                                        |                                                                                                                                                                                                                                                                                                                                                                                                                                                                                                                                                                                                                                                                                                                                                                                                                                                                                                                                                                                                                                                                                                                                                                                                                                                                                                                                                                                                                                                                                                                                                                                                                                                                                                                                                                                                                                                                                                                                                                                                                                                                                                                                                                                                                                                                                                                                                                                                                                                                                                                                                                                                                                                                                                                                                                                                                                                                                                                                                                                                                                                                                                                                                           |   |         |         |          |   |          |         |          |   |          |         |          |   |         |         |          |   |          |         |          |   |          |         |          |   |         |          |          |   |         |         |          |   |         |         |         |   |          |         |          |   |         |          |         |   |         |          |         |   |         |         |         |   |          |          |         |   |          |          |         |   |         |         |         |   |         |         |         |   |          |          |          |   |         |          |          |   |         |          |          |   |          |          |          |   |          |          |          |   |          |          |          |   |          |          |          |   |          |          |          |   |          |          |          |   |          |          |          |   |          |          |          |   |          |          |          |   |          |          |          |   |          |          |         |   |          |          |          |   |          |          |         |   |          |          |         |   |          |          |         |   |          |          |         |   |          |          |         |   |          |          |          |   |          |          |         |   |          |         |         |   |          |         |         |   |          |         |          |   |          |         |         |
| H                                                                                                                                                                                                                      | -2.33652                                                                                                                                                                                                                                                                                                                                                                                                                                                                                                                                                                                                                                                                                                                                                                                                                                                                                                                                                                                                                                                                                                                                                                                                                                                                                                                                                                                                                                                                                                                                                                                                                                                                                                                                                                                                                                                                                                                                                                                                                                                                                                                                                                                                                                                                                                                                                                                                                                                                                                                                                                                                                                                                                                                                                                                                                                                                                                                                                                                                                                                                                                                                           | 2.08428  | 1.16016  |         |          |   |         |         |          |   |         |         |         |   |         |          |          |   |         |         |          |   |         |         |          |   |         |          |          |   |         |         |          |   |         |         |         |   |         |          |          |   |         |         |         |   |         |         |         |   |         |         |         |   |          |         |         |   |          |         |         |   |         |         |         |   |         |         |         |   |          |          |         |   |         |          |         |   |         |         |         |   |         |          |          |   |         |          |          |   |         |          |          |   |         |          |          |   |         |          |          |   |         |          |          |   |          |          |          |   |          |          |          |   |          |          |          |   |          |          |          |   |          |         |         |   |          |         |         |   |          |         |         |   |          |         |         |   |          |         |         |   |          |          |         |   |          |          |          |   |          |          |         |   |          |          |         |   |          |          |         |                                                                                                                                                                                                                      |                                                                                                                                                                                                                                                                                                                                                                                                                                                                                                                                                                                                                                                                                                                                                                                                                                                                                                                                                                                                                                                                                                                                                                                                                                                                                                                                                                                                                                                                                                                                                                                                                                                                                                                                                                                                                                                                                                                                                                                                                                                                                                                                                                                                                                                                                                                                                                                                                                                                                                                                                                                                                                                                                                                                                                                                                                                                                                                                         |         |          |         |          |         |          |         |          |         |          |                                                                                                                                                                                                                        |                                                                                                                                                                                                                                                                                                                                                                                                                                                                                                                                                                                                                                                                                                                                                                                                                                                                                                                                                                                                                                                                                                                                                                                                                                                                                                                                                                                                                                                                                                                                                                                                                                                                                                                                                                                                                                                                                                                                                                                                                                                                                                                                                                                                                                                                                                                                                                                                                                                                                                                                                                                                                                                                                                                                                                                                                                                                                                                                                                                                                                                                                                                                                           |   |         |         |          |   |          |         |          |   |          |         |          |   |         |         |          |   |          |         |          |   |          |         |          |   |         |          |          |   |         |         |          |   |         |         |         |   |          |         |          |   |         |          |         |   |         |          |         |   |         |         |         |   |          |          |         |   |          |          |         |   |         |         |         |   |         |         |         |   |          |          |          |   |         |          |          |   |         |          |          |   |          |          |          |   |          |          |          |   |          |          |          |   |          |          |          |   |          |          |          |   |          |          |          |   |          |          |          |   |          |          |          |   |          |          |          |   |          |          |          |   |          |          |         |   |          |          |          |   |          |          |         |   |          |          |         |   |          |          |         |   |          |          |         |   |          |          |         |   |          |          |          |   |          |          |         |   |          |         |         |   |          |         |         |   |          |         |          |   |          |         |         |
| H                                                                                                                                                                                                                      | -2.75252                                                                                                                                                                                                                                                                                                                                                                                                                                                                                                                                                                                                                                                                                                                                                                                                                                                                                                                                                                                                                                                                                                                                                                                                                                                                                                                                                                                                                                                                                                                                                                                                                                                                                                                                                                                                                                                                                                                                                                                                                                                                                                                                                                                                                                                                                                                                                                                                                                                                                                                                                                                                                                                                                                                                                                                                                                                                                                                                                                                                                                                                                                                                           | 1.17984  | -0.29833 |         |          |   |         |         |          |   |         |         |         |   |         |          |          |   |         |         |          |   |         |         |          |   |         |          |          |   |         |         |          |   |         |         |         |   |         |          |          |   |         |         |         |   |         |         |         |   |         |         |         |   |          |         |         |   |          |         |         |   |         |         |         |   |         |         |         |   |          |          |         |   |         |          |         |   |         |         |         |   |         |          |          |   |         |          |          |   |         |          |          |   |         |          |          |   |         |          |          |   |         |          |          |   |          |          |          |   |          |          |          |   |          |          |          |   |          |          |          |   |          |         |         |   |          |         |         |   |          |         |         |   |          |         |         |   |          |         |         |   |          |          |         |   |          |          |          |   |          |          |         |   |          |          |         |   |          |          |         |                                                                                                                                                                                                                      |                                                                                                                                                                                                                                                                                                                                                                                                                                                                                                                                                                                                                                                                                                                                                                                                                                                                                                                                                                                                                                                                                                                                                                                                                                                                                                                                                                                                                                                                                                                                                                                                                                                                                                                                                                                                                                                                                                                                                                                                                                                                                                                                                                                                                                                                                                                                                                                                                                                                                                                                                                                                                                                                                                                                                                                                                                                                                                                                         |         |          |         |          |         |          |         |          |         |          |                                                                                                                                                                                                                        |                                                                                                                                                                                                                                                                                                                                                                                                                                                                                                                                                                                                                                                                                                                                                                                                                                                                                                                                                                                                                                                                                                                                                                                                                                                                                                                                                                                                                                                                                                                                                                                                                                                                                                                                                                                                                                                                                                                                                                                                                                                                                                                                                                                                                                                                                                                                                                                                                                                                                                                                                                                                                                                                                                                                                                                                                                                                                                                                                                                                                                                                                                                                                           |   |         |         |          |   |          |         |          |   |          |         |          |   |         |         |          |   |          |         |          |   |          |         |          |   |         |          |          |   |         |         |          |   |         |         |         |   |          |         |          |   |         |          |         |   |         |          |         |   |         |         |         |   |          |          |         |   |          |          |         |   |         |         |         |   |         |         |         |   |          |          |          |   |         |          |          |   |         |          |          |   |          |          |          |   |          |          |          |   |          |          |          |   |          |          |          |   |          |          |          |   |          |          |          |   |          |          |          |   |          |          |          |   |          |          |          |   |          |          |          |   |          |          |         |   |          |          |          |   |          |          |         |   |          |          |         |   |          |          |         |   |          |          |         |   |          |          |         |   |          |          |          |   |          |          |         |   |          |         |         |   |          |         |         |   |          |         |          |   |          |         |         |
| H                                                                                                                                                                                                                      | -1.08322                                                                                                                                                                                                                                                                                                                                                                                                                                                                                                                                                                                                                                                                                                                                                                                                                                                                                                                                                                                                                                                                                                                                                                                                                                                                                                                                                                                                                                                                                                                                                                                                                                                                                                                                                                                                                                                                                                                                                                                                                                                                                                                                                                                                                                                                                                                                                                                                                                                                                                                                                                                                                                                                                                                                                                                                                                                                                                                                                                                                                                                                                                                                           | 1.67917  | 0.01300  |         |          |   |         |         |          |   |         |         |         |   |         |          |          |   |         |         |          |   |         |         |          |   |         |          |          |   |         |         |          |   |         |         |         |   |         |          |          |   |         |         |         |   |         |         |         |   |         |         |         |   |          |         |         |   |          |         |         |   |         |         |         |   |         |         |         |   |          |          |         |   |         |          |         |   |         |         |         |   |         |          |          |   |         |          |          |   |         |          |          |   |         |          |          |   |         |          |          |   |         |          |          |   |          |          |          |   |          |          |          |   |          |          |          |   |          |          |          |   |          |         |         |   |          |         |         |   |          |         |         |   |          |         |         |   |          |         |         |   |          |          |         |   |          |          |          |   |          |          |         |   |          |          |         |   |          |          |         |                                                                                                                                                                                                                      |                                                                                                                                                                                                                                                                                                                                                                                                                                                                                                                                                                                                                                                                                                                                                                                                                                                                                                                                                                                                                                                                                                                                                                                                                                                                                                                                                                                                                                                                                                                                                                                                                                                                                                                                                                                                                                                                                                                                                                                                                                                                                                                                                                                                                                                                                                                                                                                                                                                                                                                                                                                                                                                                                                                                                                                                                                                                                                                                         |         |          |         |          |         |          |         |          |         |          |                                                                                                                                                                                                                        |                                                                                                                                                                                                                                                                                                                                                                                                                                                                                                                                                                                                                                                                                                                                                                                                                                                                                                                                                                                                                                                                                                                                                                                                                                                                                                                                                                                                                                                                                                                                                                                                                                                                                                                                                                                                                                                                                                                                                                                                                                                                                                                                                                                                                                                                                                                                                                                                                                                                                                                                                                                                                                                                                                                                                                                                                                                                                                                                                                                                                                                                                                                                                           |   |         |         |          |   |          |         |          |   |          |         |          |   |         |         |          |   |          |         |          |   |          |         |          |   |         |          |          |   |         |         |          |   |         |         |         |   |          |         |          |   |         |          |         |   |         |          |         |   |         |         |         |   |          |          |         |   |          |          |         |   |         |         |         |   |         |         |         |   |          |          |          |   |         |          |          |   |         |          |          |   |          |          |          |   |          |          |          |   |          |          |          |   |          |          |          |   |          |          |          |   |          |          |          |   |          |          |          |   |          |          |          |   |          |          |          |   |          |          |          |   |          |          |         |   |          |          |          |   |          |          |         |   |          |          |         |   |          |          |         |   |          |          |         |   |          |          |         |   |          |          |          |   |          |          |         |   |          |         |         |   |          |         |         |   |          |         |          |   |          |         |         |

|                                                                                                                                                         |                                                                                                                                                                                                                                                                                                                                                                                                                                                                                                                                                                                                                                                                                                                                                                                                                                                                                                                                                                                                                                                                                                                                                                                                                                                                                                                                                                                                                                                                                                                                                                                                                                                                                                                                                                                                                                                                                                                                                                                                                                                                                                                                                                                                                                                                                        |          |          |         |          |   |         |         |          |   |         |         |         |   |         |          |          |   |         |         |          |   |         |         |         |   |          |          |          |   |         |         |          |   |         |         |         |   |          |          |         |   |          |         |         |   |          |         |         |   |         |         |         |   |          |         |         |   |          |         |         |   |         |         |         |   |         |         |         |   |          |         |         |   |         |         |         |   |          |         |         |                                                                                                                                                          |                                                                                                                                                                                                                                                                                                                                                                                                                                                                                                                                                                                                                                                                                                                                                                                                                                                                                                                                                                                                                                                                                                                                                                                                                                                                                                                                                                                                                                                                                    |          |          |         |          |          |          |         |          |          |          |          |          |          |          |         |          |          |          |         |          |          |          |         |          |          |          |          |          |          |          |         |          |          |          |         |          |          |          |          |          |         |         |                                                                                                                                                         |                                                                                                                                                                                                                                                                                                                                                                                                                                                                                                                                                                                                                                                                                                                                                                                                                                                                                                                                                                                                                                                                                                                                                                                                                                                                                                                                                                                                                                                                                                                                                                                                                                                                                                                                                                                                                                                                                                                                                                                                                                                                                                                                                                                                                                                                                               |   |         |          |          |   |         |          |          |   |         |          |          |   |         |          |          |   |         |          |          |   |         |          |          |   |          |          |          |   |         |          |          |   |         |          |          |   |          |          |          |   |         |         |         |   |          |         |         |   |         |         |         |   |          |         |         |   |          |         |         |   |         |         |         |   |         |          |         |   |          |         |         |   |         |         |         |   |          |         |         |   |          |          |          |   |          |          |          |   |          |          |          |   |          |          |          |   |          |          |          |   |          |          |          |   |          |         |          |   |          |         |          |   |          |         |          |   |          |         |          |    |          |         |         |
|---------------------------------------------------------------------------------------------------------------------------------------------------------|----------------------------------------------------------------------------------------------------------------------------------------------------------------------------------------------------------------------------------------------------------------------------------------------------------------------------------------------------------------------------------------------------------------------------------------------------------------------------------------------------------------------------------------------------------------------------------------------------------------------------------------------------------------------------------------------------------------------------------------------------------------------------------------------------------------------------------------------------------------------------------------------------------------------------------------------------------------------------------------------------------------------------------------------------------------------------------------------------------------------------------------------------------------------------------------------------------------------------------------------------------------------------------------------------------------------------------------------------------------------------------------------------------------------------------------------------------------------------------------------------------------------------------------------------------------------------------------------------------------------------------------------------------------------------------------------------------------------------------------------------------------------------------------------------------------------------------------------------------------------------------------------------------------------------------------------------------------------------------------------------------------------------------------------------------------------------------------------------------------------------------------------------------------------------------------------------------------------------------------------------------------------------------------|----------|----------|---------|----------|---|---------|---------|----------|---|---------|---------|---------|---|---------|----------|----------|---|---------|---------|----------|---|---------|---------|---------|---|----------|----------|----------|---|---------|---------|----------|---|---------|---------|---------|---|----------|----------|---------|---|----------|---------|---------|---|----------|---------|---------|---|---------|---------|---------|---|----------|---------|---------|---|----------|---------|---------|---|---------|---------|---------|---|---------|---------|---------|---|----------|---------|---------|---|---------|---------|---------|---|----------|---------|---------|----------------------------------------------------------------------------------------------------------------------------------------------------------|------------------------------------------------------------------------------------------------------------------------------------------------------------------------------------------------------------------------------------------------------------------------------------------------------------------------------------------------------------------------------------------------------------------------------------------------------------------------------------------------------------------------------------------------------------------------------------------------------------------------------------------------------------------------------------------------------------------------------------------------------------------------------------------------------------------------------------------------------------------------------------------------------------------------------------------------------------------------------------------------------------------------------------------------------------------------------------------------------------------------------------------------------------------------------------------------------------------------------------------------------------------------------------------------------------------------------------------------------------------------------------------------------------------------------------------------------------------------------------|----------|----------|---------|----------|----------|----------|---------|----------|----------|----------|----------|----------|----------|----------|---------|----------|----------|----------|---------|----------|----------|----------|---------|----------|----------|----------|----------|----------|----------|----------|---------|----------|----------|----------|---------|----------|----------|----------|----------|----------|---------|---------|---------------------------------------------------------------------------------------------------------------------------------------------------------|-----------------------------------------------------------------------------------------------------------------------------------------------------------------------------------------------------------------------------------------------------------------------------------------------------------------------------------------------------------------------------------------------------------------------------------------------------------------------------------------------------------------------------------------------------------------------------------------------------------------------------------------------------------------------------------------------------------------------------------------------------------------------------------------------------------------------------------------------------------------------------------------------------------------------------------------------------------------------------------------------------------------------------------------------------------------------------------------------------------------------------------------------------------------------------------------------------------------------------------------------------------------------------------------------------------------------------------------------------------------------------------------------------------------------------------------------------------------------------------------------------------------------------------------------------------------------------------------------------------------------------------------------------------------------------------------------------------------------------------------------------------------------------------------------------------------------------------------------------------------------------------------------------------------------------------------------------------------------------------------------------------------------------------------------------------------------------------------------------------------------------------------------------------------------------------------------------------------------------------------------------------------------------------------------|---|---------|----------|----------|---|---------|----------|----------|---|---------|----------|----------|---|---------|----------|----------|---|---------|----------|----------|---|---------|----------|----------|---|----------|----------|----------|---|---------|----------|----------|---|---------|----------|----------|---|----------|----------|----------|---|---------|---------|---------|---|----------|---------|---------|---|---------|---------|---------|---|----------|---------|---------|---|----------|---------|---------|---|---------|---------|---------|---|---------|----------|---------|---|----------|---------|---------|---|---------|---------|---------|---|----------|---------|---------|---|----------|----------|----------|---|----------|----------|----------|---|----------|----------|----------|---|----------|----------|----------|---|----------|----------|----------|---|----------|----------|----------|---|----------|---------|----------|---|----------|---------|----------|---|----------|---------|----------|---|----------|---------|----------|----|----------|---------|---------|
| 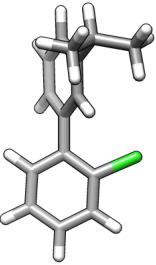 <p><b>1e</b><br/>-1040.677670<br/>-1040.657642<br/>-1041.215382</p>   | <table border="1"> <tbody> <tr><td>H</td><td>1.29501</td><td>0.80972</td><td>-3.05546</td></tr> <tr><td>C</td><td>0.99002</td><td>0.77591</td><td>-2.01645</td></tr> <tr><td>C</td><td>0.19367</td><td>0.69249</td><td>0.65739</td></tr> <tr><td>C</td><td>0.22148</td><td>-0.29628</td><td>-1.56652</td></tr> <tr><td>C</td><td>1.36421</td><td>1.79531</td><td>-1.14613</td></tr> <tr><td>C</td><td>0.97175</td><td>1.75473</td><td>0.18514</td></tr> <tr><td>C</td><td>-0.16742</td><td>-0.32215</td><td>-0.22831</td></tr> <tr><td>H</td><td>1.95828</td><td>2.62480</td><td>-1.50771</td></tr> <tr><td>H</td><td>1.25241</td><td>2.55065</td><td>0.86244</td></tr> <tr><td>H</td><td>-0.75915</td><td>-1.15092</td><td>0.13468</td></tr> <tr><td>C</td><td>-0.18567</td><td>0.63908</td><td>2.08932</td></tr> <tr><td>C</td><td>-0.76227</td><td>0.54892</td><td>4.84938</td></tr> <tr><td>C</td><td>0.81575</td><td>0.80287</td><td>3.05663</td></tr> <tr><td>C</td><td>-1.49252</td><td>0.44102</td><td>2.55688</td></tr> <tr><td>C</td><td>-1.78008</td><td>0.39362</td><td>3.91779</td></tr> <tr><td>C</td><td>0.54243</td><td>0.75937</td><td>4.41607</td></tr> <tr><td>H</td><td>1.83118</td><td>0.95125</td><td>2.71386</td></tr> <tr><td>H</td><td>-2.80183</td><td>0.24576</td><td>4.23759</td></tr> <tr><td>H</td><td>1.34423</td><td>0.88236</td><td>5.13191</td></tr> <tr><td>H</td><td>-0.99280</td><td>0.50897</td><td>5.90565</td></tr> <tr><td>C</td><td>-0.19254</td><td>-1.40970</td><td>-2.50478</td></tr> <tr><td>H</td><td>0.22925</td><td>-1.18376</td><td>-3.48822</td></tr> <tr><td>C</td><td>0.36310</td><td>-2.76513</td><td>-2.04860</td></tr> <tr><td>H</td><td>-0.04113</td><td>-3.03203</td><td>-1.06933</td></tr> <tr><td>H</td><td>1.45160</td><td>-2.73848</td><td>-1.96986</td></tr> <tr><td>H</td><td>0.08251</td><td>-3.54933</td><td>-2.75567</td></tr> <tr><td>C</td><td>-1.71948</td><td>-1.47614</td><td>-2.64335</td></tr> <tr><td>H</td><td>-2.17946</td><td>-1.69420</td><td>-1.67664</td></tr> <tr><td>H</td><td>-2.00550</td><td>-2.26526</td><td>-3.34289</td></tr> <tr><td>H</td><td>-2.12315</td><td>-0.52744</td><td>-3.00168</td></tr> <tr><td>Cl</td><td>-2.84704</td><td>0.29956</td><td>1.45339</td></tr> </tbody> </table>  | H        | 1.29501  | 0.80972 | -3.05546 | C | 0.99002 | 0.77591 | -2.01645 | C | 0.19367 | 0.69249 | 0.65739 | C | 0.22148 | -0.29628 | -1.56652 | C | 1.36421 | 1.79531 | -1.14613 | C | 0.97175 | 1.75473 | 0.18514 | C | -0.16742 | -0.32215 | -0.22831 | H | 1.95828 | 2.62480 | -1.50771 | H | 1.25241 | 2.55065 | 0.86244 | H | -0.75915 | -1.15092 | 0.13468 | C | -0.18567 | 0.63908 | 2.08932 | C | -0.76227 | 0.54892 | 4.84938 | C | 0.81575 | 0.80287 | 3.05663 | C | -1.49252 | 0.44102 | 2.55688 | C | -1.78008 | 0.39362 | 3.91779 | C | 0.54243 | 0.75937 | 4.41607 | H | 1.83118 | 0.95125 | 2.71386 | H | -2.80183 | 0.24576 | 4.23759 | H | 1.34423 | 0.88236 | 5.13191 | H | -0.99280 | 0.50897 | 5.90565 | C                                                                                                                                                        | -0.19254                                                                                                                                                                                                                                                                                                                                                                                                                                                                                                                                                                                                                                                                                                                                                                                                                                                                                                                                                                                                                                                                                                                                                                                                                                                                                                                                                                                                                                                                           | -1.40970 | -2.50478 | H       | 0.22925  | -1.18376 | -3.48822 | C       | 0.36310  | -2.76513 | -2.04860 | H        | -0.04113 | -3.03203 | -1.06933 | H       | 1.45160  | -2.73848 | -1.96986 | H       | 0.08251  | -3.54933 | -2.75567 | C       | -1.71948 | -1.47614 | -2.64335 | H        | -2.17946 | -1.69420 | -1.67664 | H       | -2.00550 | -2.26526 | -3.34289 | H       | -2.12315 | -0.52744 | -3.00168 | Cl       | -2.84704 | 0.29956 | 1.45339 |  <p><b>1e</b><br/>-1040.666360<br/>-1040.646045<br/>-1041.205174</p>  | <table border="1"> <tbody> <tr><td>H</td><td>2.19014</td><td>-0.00129</td><td>-3.73445</td></tr> <tr><td>C</td><td>1.85182</td><td>-0.00084</td><td>-2.70535</td></tr> <tr><td>C</td><td>0.96759</td><td>0.00030</td><td>-0.00850</td></tr> <tr><td>C</td><td>0.49298</td><td>-0.00038</td><td>-2.42201</td></tr> <tr><td>C</td><td>2.76788</td><td>-0.00067</td><td>-1.65869</td></tr> <tr><td>C</td><td>2.33851</td><td>-0.00012</td><td>-0.34238</td></tr> <tr><td>C</td><td>0.07694</td><td>0.00020</td><td>-1.08966</td></tr> <tr><td>H</td><td>3.83016</td><td>-0.00101</td><td>-1.86678</td></tr> <tr><td>H</td><td>3.10283</td><td>-0.00009</td><td>0.41654</td></tr> <tr><td>H</td><td>-0.97976</td><td>0.00055</td><td>-0.91184</td></tr> <tr><td>C</td><td>0.53568</td><td>0.00061</td><td>1.42968</td></tr> <tr><td>C</td><td>-0.02935</td><td>0.00056</td><td>4.24462</td></tr> <tr><td>C</td><td>1.53525</td><td>0.00039</td><td>2.42842</td></tr> <tr><td>C</td><td>-0.78341</td><td>0.00095</td><td>1.94277</td></tr> <tr><td>C</td><td>-1.05086</td><td>0.00088</td><td>3.31305</td></tr> <tr><td>C</td><td>1.28134</td><td>0.00037</td><td>3.78736</td></tr> <tr><td>H</td><td>2.57038</td><td>0.00013</td><td>2.13398</td></tr> <tr><td>H</td><td>-2.08157</td><td>0.00113</td><td>3.63757</td></tr> <tr><td>H</td><td>2.11033</td><td>0.00018</td><td>4.48238</td></tr> <tr><td>H</td><td>-0.25787</td><td>0.00057</td><td>5.30178</td></tr> <tr><td>C</td><td>-0.53944</td><td>-0.00010</td><td>-3.53002</td></tr> <tr><td>H</td><td>0.00104</td><td>-0.00218</td><td>-4.48085</td></tr> <tr><td>C</td><td>-1.41659</td><td>-1.25810</td><td>-3.47697</td></tr> <tr><td>H</td><td>-1.97724</td><td>-1.29109</td><td>-2.53988</td></tr> <tr><td>H</td><td>-0.81046</td><td>-2.16383</td><td>-3.54039</td></tr> <tr><td>H</td><td>-2.13316</td><td>-1.25809</td><td>-4.30173</td></tr> <tr><td>C</td><td>-1.41209</td><td>1.26118</td><td>-3.47991</td></tr> <tr><td>H</td><td>-1.97208</td><td>1.29862</td><td>-2.54258</td></tr> <tr><td>H</td><td>-2.12908</td><td>1.26158</td><td>-4.30430</td></tr> <tr><td>H</td><td>-0.80273</td><td>2.16455</td><td>-3.54602</td></tr> <tr><td>Cl</td><td>-2.26027</td><td>0.00152</td><td>0.98006</td></tr> </tbody> </table>     | H | 2.19014 | -0.00129 | -3.73445 | C | 1.85182 | -0.00084 | -2.70535 | C | 0.96759 | 0.00030  | -0.00850 | C | 0.49298 | -0.00038 | -2.42201 | C | 2.76788 | -0.00067 | -1.65869 | C | 2.33851 | -0.00012 | -0.34238 | C | 0.07694  | 0.00020  | -1.08966 | H | 3.83016 | -0.00101 | -1.86678 | H | 3.10283 | -0.00009 | 0.41654  | H | -0.97976 | 0.00055  | -0.91184 | C | 0.53568 | 0.00061 | 1.42968 | C | -0.02935 | 0.00056 | 4.24462 | C | 1.53525 | 0.00039 | 2.42842 | C | -0.78341 | 0.00095 | 1.94277 | C | -1.05086 | 0.00088 | 3.31305 | C | 1.28134 | 0.00037 | 3.78736 | H | 2.57038 | 0.00013  | 2.13398 | H | -2.08157 | 0.00113 | 3.63757 | H | 2.11033 | 0.00018 | 4.48238 | H | -0.25787 | 0.00057 | 5.30178 | C | -0.53944 | -0.00010 | -3.53002 | H | 0.00104  | -0.00218 | -4.48085 | C | -1.41659 | -1.25810 | -3.47697 | H | -1.97724 | -1.29109 | -2.53988 | H | -0.81046 | -2.16383 | -3.54039 | H | -2.13316 | -1.25809 | -4.30173 | C | -1.41209 | 1.26118 | -3.47991 | H | -1.97208 | 1.29862 | -2.54258 | H | -2.12908 | 1.26158 | -4.30430 | H | -0.80273 | 2.16455 | -3.54602 | Cl | -2.26027 | 0.00152 | 0.98006 |
| H                                                                                                                                                       | 1.29501                                                                                                                                                                                                                                                                                                                                                                                                                                                                                                                                                                                                                                                                                                                                                                                                                                                                                                                                                                                                                                                                                                                                                                                                                                                                                                                                                                                                                                                                                                                                                                                                                                                                                                                                                                                                                                                                                                                                                                                                                                                                                                                                                                                                                                                                                | 0.80972  | -3.05546 |         |          |   |         |         |          |   |         |         |         |   |         |          |          |   |         |         |          |   |         |         |         |   |          |          |          |   |         |         |          |   |         |         |         |   |          |          |         |   |          |         |         |   |          |         |         |   |         |         |         |   |          |         |         |   |          |         |         |   |         |         |         |   |         |         |         |   |          |         |         |   |         |         |         |   |          |         |         |                                                                                                                                                          |                                                                                                                                                                                                                                                                                                                                                                                                                                                                                                                                                                                                                                                                                                                                                                                                                                                                                                                                                                                                                                                                                                                                                                                                                                                                                                                                                                                                                                                                                    |          |          |         |          |          |          |         |          |          |          |          |          |          |          |         |          |          |          |         |          |          |          |         |          |          |          |          |          |          |          |         |          |          |          |         |          |          |          |          |          |         |         |                                                                                                                                                         |                                                                                                                                                                                                                                                                                                                                                                                                                                                                                                                                                                                                                                                                                                                                                                                                                                                                                                                                                                                                                                                                                                                                                                                                                                                                                                                                                                                                                                                                                                                                                                                                                                                                                                                                                                                                                                                                                                                                                                                                                                                                                                                                                                                                                                                                                               |   |         |          |          |   |         |          |          |   |         |          |          |   |         |          |          |   |         |          |          |   |         |          |          |   |          |          |          |   |         |          |          |   |         |          |          |   |          |          |          |   |         |         |         |   |          |         |         |   |         |         |         |   |          |         |         |   |          |         |         |   |         |         |         |   |         |          |         |   |          |         |         |   |         |         |         |   |          |         |         |   |          |          |          |   |          |          |          |   |          |          |          |   |          |          |          |   |          |          |          |   |          |          |          |   |          |         |          |   |          |         |          |   |          |         |          |   |          |         |          |    |          |         |         |
| C                                                                                                                                                       | 0.99002                                                                                                                                                                                                                                                                                                                                                                                                                                                                                                                                                                                                                                                                                                                                                                                                                                                                                                                                                                                                                                                                                                                                                                                                                                                                                                                                                                                                                                                                                                                                                                                                                                                                                                                                                                                                                                                                                                                                                                                                                                                                                                                                                                                                                                                                                | 0.77591  | -2.01645 |         |          |   |         |         |          |   |         |         |         |   |         |          |          |   |         |         |          |   |         |         |         |   |          |          |          |   |         |         |          |   |         |         |         |   |          |          |         |   |          |         |         |   |          |         |         |   |         |         |         |   |          |         |         |   |          |         |         |   |         |         |         |   |         |         |         |   |          |         |         |   |         |         |         |   |          |         |         |                                                                                                                                                          |                                                                                                                                                                                                                                                                                                                                                                                                                                                                                                                                                                                                                                                                                                                                                                                                                                                                                                                                                                                                                                                                                                                                                                                                                                                                                                                                                                                                                                                                                    |          |          |         |          |          |          |         |          |          |          |          |          |          |          |         |          |          |          |         |          |          |          |         |          |          |          |          |          |          |          |         |          |          |          |         |          |          |          |          |          |         |         |                                                                                                                                                         |                                                                                                                                                                                                                                                                                                                                                                                                                                                                                                                                                                                                                                                                                                                                                                                                                                                                                                                                                                                                                                                                                                                                                                                                                                                                                                                                                                                                                                                                                                                                                                                                                                                                                                                                                                                                                                                                                                                                                                                                                                                                                                                                                                                                                                                                                               |   |         |          |          |   |         |          |          |   |         |          |          |   |         |          |          |   |         |          |          |   |         |          |          |   |          |          |          |   |         |          |          |   |         |          |          |   |          |          |          |   |         |         |         |   |          |         |         |   |         |         |         |   |          |         |         |   |          |         |         |   |         |         |         |   |         |          |         |   |          |         |         |   |         |         |         |   |          |         |         |   |          |          |          |   |          |          |          |   |          |          |          |   |          |          |          |   |          |          |          |   |          |          |          |   |          |         |          |   |          |         |          |   |          |         |          |   |          |         |          |    |          |         |         |
| C                                                                                                                                                       | 0.19367                                                                                                                                                                                                                                                                                                                                                                                                                                                                                                                                                                                                                                                                                                                                                                                                                                                                                                                                                                                                                                                                                                                                                                                                                                                                                                                                                                                                                                                                                                                                                                                                                                                                                                                                                                                                                                                                                                                                                                                                                                                                                                                                                                                                                                                                                | 0.69249  | 0.65739  |         |          |   |         |         |          |   |         |         |         |   |         |          |          |   |         |         |          |   |         |         |         |   |          |          |          |   |         |         |          |   |         |         |         |   |          |          |         |   |          |         |         |   |          |         |         |   |         |         |         |   |          |         |         |   |          |         |         |   |         |         |         |   |         |         |         |   |          |         |         |   |         |         |         |   |          |         |         |                                                                                                                                                          |                                                                                                                                                                                                                                                                                                                                                                                                                                                                                                                                                                                                                                                                                                                                                                                                                                                                                                                                                                                                                                                                                                                                                                                                                                                                                                                                                                                                                                                                                    |          |          |         |          |          |          |         |          |          |          |          |          |          |          |         |          |          |          |         |          |          |          |         |          |          |          |          |          |          |          |         |          |          |          |         |          |          |          |          |          |         |         |                                                                                                                                                         |                                                                                                                                                                                                                                                                                                                                                                                                                                                                                                                                                                                                                                                                                                                                                                                                                                                                                                                                                                                                                                                                                                                                                                                                                                                                                                                                                                                                                                                                                                                                                                                                                                                                                                                                                                                                                                                                                                                                                                                                                                                                                                                                                                                                                                                                                               |   |         |          |          |   |         |          |          |   |         |          |          |   |         |          |          |   |         |          |          |   |         |          |          |   |          |          |          |   |         |          |          |   |         |          |          |   |          |          |          |   |         |         |         |   |          |         |         |   |         |         |         |   |          |         |         |   |          |         |         |   |         |         |         |   |         |          |         |   |          |         |         |   |         |         |         |   |          |         |         |   |          |          |          |   |          |          |          |   |          |          |          |   |          |          |          |   |          |          |          |   |          |          |          |   |          |         |          |   |          |         |          |   |          |         |          |   |          |         |          |    |          |         |         |
| C                                                                                                                                                       | 0.22148                                                                                                                                                                                                                                                                                                                                                                                                                                                                                                                                                                                                                                                                                                                                                                                                                                                                                                                                                                                                                                                                                                                                                                                                                                                                                                                                                                                                                                                                                                                                                                                                                                                                                                                                                                                                                                                                                                                                                                                                                                                                                                                                                                                                                                                                                | -0.29628 | -1.56652 |         |          |   |         |         |          |   |         |         |         |   |         |          |          |   |         |         |          |   |         |         |         |   |          |          |          |   |         |         |          |   |         |         |         |   |          |          |         |   |          |         |         |   |          |         |         |   |         |         |         |   |          |         |         |   |          |         |         |   |         |         |         |   |         |         |         |   |          |         |         |   |         |         |         |   |          |         |         |                                                                                                                                                          |                                                                                                                                                                                                                                                                                                                                                                                                                                                                                                                                                                                                                                                                                                                                                                                                                                                                                                                                                                                                                                                                                                                                                                                                                                                                                                                                                                                                                                                                                    |          |          |         |          |          |          |         |          |          |          |          |          |          |          |         |          |          |          |         |          |          |          |         |          |          |          |          |          |          |          |         |          |          |          |         |          |          |          |          |          |         |         |                                                                                                                                                         |                                                                                                                                                                                                                                                                                                                                                                                                                                                                                                                                                                                                                                                                                                                                                                                                                                                                                                                                                                                                                                                                                                                                                                                                                                                                                                                                                                                                                                                                                                                                                                                                                                                                                                                                                                                                                                                                                                                                                                                                                                                                                                                                                                                                                                                                                               |   |         |          |          |   |         |          |          |   |         |          |          |   |         |          |          |   |         |          |          |   |         |          |          |   |          |          |          |   |         |          |          |   |         |          |          |   |          |          |          |   |         |         |         |   |          |         |         |   |         |         |         |   |          |         |         |   |          |         |         |   |         |         |         |   |         |          |         |   |          |         |         |   |         |         |         |   |          |         |         |   |          |          |          |   |          |          |          |   |          |          |          |   |          |          |          |   |          |          |          |   |          |          |          |   |          |         |          |   |          |         |          |   |          |         |          |   |          |         |          |    |          |         |         |
| C                                                                                                                                                       | 1.36421                                                                                                                                                                                                                                                                                                                                                                                                                                                                                                                                                                                                                                                                                                                                                                                                                                                                                                                                                                                                                                                                                                                                                                                                                                                                                                                                                                                                                                                                                                                                                                                                                                                                                                                                                                                                                                                                                                                                                                                                                                                                                                                                                                                                                                                                                | 1.79531  | -1.14613 |         |          |   |         |         |          |   |         |         |         |   |         |          |          |   |         |         |          |   |         |         |         |   |          |          |          |   |         |         |          |   |         |         |         |   |          |          |         |   |          |         |         |   |          |         |         |   |         |         |         |   |          |         |         |   |          |         |         |   |         |         |         |   |         |         |         |   |          |         |         |   |         |         |         |   |          |         |         |                                                                                                                                                          |                                                                                                                                                                                                                                                                                                                                                                                                                                                                                                                                                                                                                                                                                                                                                                                                                                                                                                                                                                                                                                                                                                                                                                                                                                                                                                                                                                                                                                                                                    |          |          |         |          |          |          |         |          |          |          |          |          |          |          |         |          |          |          |         |          |          |          |         |          |          |          |          |          |          |          |         |          |          |          |         |          |          |          |          |          |         |         |                                                                                                                                                         |                                                                                                                                                                                                                                                                                                                                                                                                                                                                                                                                                                                                                                                                                                                                                                                                                                                                                                                                                                                                                                                                                                                                                                                                                                                                                                                                                                                                                                                                                                                                                                                                                                                                                                                                                                                                                                                                                                                                                                                                                                                                                                                                                                                                                                                                                               |   |         |          |          |   |         |          |          |   |         |          |          |   |         |          |          |   |         |          |          |   |         |          |          |   |          |          |          |   |         |          |          |   |         |          |          |   |          |          |          |   |         |         |         |   |          |         |         |   |         |         |         |   |          |         |         |   |          |         |         |   |         |         |         |   |         |          |         |   |          |         |         |   |         |         |         |   |          |         |         |   |          |          |          |   |          |          |          |   |          |          |          |   |          |          |          |   |          |          |          |   |          |          |          |   |          |         |          |   |          |         |          |   |          |         |          |   |          |         |          |    |          |         |         |
| C                                                                                                                                                       | 0.97175                                                                                                                                                                                                                                                                                                                                                                                                                                                                                                                                                                                                                                                                                                                                                                                                                                                                                                                                                                                                                                                                                                                                                                                                                                                                                                                                                                                                                                                                                                                                                                                                                                                                                                                                                                                                                                                                                                                                                                                                                                                                                                                                                                                                                                                                                | 1.75473  | 0.18514  |         |          |   |         |         |          |   |         |         |         |   |         |          |          |   |         |         |          |   |         |         |         |   |          |          |          |   |         |         |          |   |         |         |         |   |          |          |         |   |          |         |         |   |          |         |         |   |         |         |         |   |          |         |         |   |          |         |         |   |         |         |         |   |         |         |         |   |          |         |         |   |         |         |         |   |          |         |         |                                                                                                                                                          |                                                                                                                                                                                                                                                                                                                                                                                                                                                                                                                                                                                                                                                                                                                                                                                                                                                                                                                                                                                                                                                                                                                                                                                                                                                                                                                                                                                                                                                                                    |          |          |         |          |          |          |         |          |          |          |          |          |          |          |         |          |          |          |         |          |          |          |         |          |          |          |          |          |          |          |         |          |          |          |         |          |          |          |          |          |         |         |                                                                                                                                                         |                                                                                                                                                                                                                                                                                                                                                                                                                                                                                                                                                                                                                                                                                                                                                                                                                                                                                                                                                                                                                                                                                                                                                                                                                                                                                                                                                                                                                                                                                                                                                                                                                                                                                                                                                                                                                                                                                                                                                                                                                                                                                                                                                                                                                                                                                               |   |         |          |          |   |         |          |          |   |         |          |          |   |         |          |          |   |         |          |          |   |         |          |          |   |          |          |          |   |         |          |          |   |         |          |          |   |          |          |          |   |         |         |         |   |          |         |         |   |         |         |         |   |          |         |         |   |          |         |         |   |         |         |         |   |         |          |         |   |          |         |         |   |         |         |         |   |          |         |         |   |          |          |          |   |          |          |          |   |          |          |          |   |          |          |          |   |          |          |          |   |          |          |          |   |          |         |          |   |          |         |          |   |          |         |          |   |          |         |          |    |          |         |         |
| C                                                                                                                                                       | -0.16742                                                                                                                                                                                                                                                                                                                                                                                                                                                                                                                                                                                                                                                                                                                                                                                                                                                                                                                                                                                                                                                                                                                                                                                                                                                                                                                                                                                                                                                                                                                                                                                                                                                                                                                                                                                                                                                                                                                                                                                                                                                                                                                                                                                                                                                                               | -0.32215 | -0.22831 |         |          |   |         |         |          |   |         |         |         |   |         |          |          |   |         |         |          |   |         |         |         |   |          |          |          |   |         |         |          |   |         |         |         |   |          |          |         |   |          |         |         |   |          |         |         |   |         |         |         |   |          |         |         |   |          |         |         |   |         |         |         |   |         |         |         |   |          |         |         |   |         |         |         |   |          |         |         |                                                                                                                                                          |                                                                                                                                                                                                                                                                                                                                                                                                                                                                                                                                                                                                                                                                                                                                                                                                                                                                                                                                                                                                                                                                                                                                                                                                                                                                                                                                                                                                                                                                                    |          |          |         |          |          |          |         |          |          |          |          |          |          |          |         |          |          |          |         |          |          |          |         |          |          |          |          |          |          |          |         |          |          |          |         |          |          |          |          |          |         |         |                                                                                                                                                         |                                                                                                                                                                                                                                                                                                                                                                                                                                                                                                                                                                                                                                                                                                                                                                                                                                                                                                                                                                                                                                                                                                                                                                                                                                                                                                                                                                                                                                                                                                                                                                                                                                                                                                                                                                                                                                                                                                                                                                                                                                                                                                                                                                                                                                                                                               |   |         |          |          |   |         |          |          |   |         |          |          |   |         |          |          |   |         |          |          |   |         |          |          |   |          |          |          |   |         |          |          |   |         |          |          |   |          |          |          |   |         |         |         |   |          |         |         |   |         |         |         |   |          |         |         |   |          |         |         |   |         |         |         |   |         |          |         |   |          |         |         |   |         |         |         |   |          |         |         |   |          |          |          |   |          |          |          |   |          |          |          |   |          |          |          |   |          |          |          |   |          |          |          |   |          |         |          |   |          |         |          |   |          |         |          |   |          |         |          |    |          |         |         |
| H                                                                                                                                                       | 1.95828                                                                                                                                                                                                                                                                                                                                                                                                                                                                                                                                                                                                                                                                                                                                                                                                                                                                                                                                                                                                                                                                                                                                                                                                                                                                                                                                                                                                                                                                                                                                                                                                                                                                                                                                                                                                                                                                                                                                                                                                                                                                                                                                                                                                                                                                                | 2.62480  | -1.50771 |         |          |   |         |         |          |   |         |         |         |   |         |          |          |   |         |         |          |   |         |         |         |   |          |          |          |   |         |         |          |   |         |         |         |   |          |          |         |   |          |         |         |   |          |         |         |   |         |         |         |   |          |         |         |   |          |         |         |   |         |         |         |   |         |         |         |   |          |         |         |   |         |         |         |   |          |         |         |                                                                                                                                                          |                                                                                                                                                                                                                                                                                                                                                                                                                                                                                                                                                                                                                                                                                                                                                                                                                                                                                                                                                                                                                                                                                                                                                                                                                                                                                                                                                                                                                                                                                    |          |          |         |          |          |          |         |          |          |          |          |          |          |          |         |          |          |          |         |          |          |          |         |          |          |          |          |          |          |          |         |          |          |          |         |          |          |          |          |          |         |         |                                                                                                                                                         |                                                                                                                                                                                                                                                                                                                                                                                                                                                                                                                                                                                                                                                                                                                                                                                                                                                                                                                                                                                                                                                                                                                                                                                                                                                                                                                                                                                                                                                                                                                                                                                                                                                                                                                                                                                                                                                                                                                                                                                                                                                                                                                                                                                                                                                                                               |   |         |          |          |   |         |          |          |   |         |          |          |   |         |          |          |   |         |          |          |   |         |          |          |   |          |          |          |   |         |          |          |   |         |          |          |   |          |          |          |   |         |         |         |   |          |         |         |   |         |         |         |   |          |         |         |   |          |         |         |   |         |         |         |   |         |          |         |   |          |         |         |   |         |         |         |   |          |         |         |   |          |          |          |   |          |          |          |   |          |          |          |   |          |          |          |   |          |          |          |   |          |          |          |   |          |         |          |   |          |         |          |   |          |         |          |   |          |         |          |    |          |         |         |
| H                                                                                                                                                       | 1.25241                                                                                                                                                                                                                                                                                                                                                                                                                                                                                                                                                                                                                                                                                                                                                                                                                                                                                                                                                                                                                                                                                                                                                                                                                                                                                                                                                                                                                                                                                                                                                                                                                                                                                                                                                                                                                                                                                                                                                                                                                                                                                                                                                                                                                                                                                | 2.55065  | 0.86244  |         |          |   |         |         |          |   |         |         |         |   |         |          |          |   |         |         |          |   |         |         |         |   |          |          |          |   |         |         |          |   |         |         |         |   |          |          |         |   |          |         |         |   |          |         |         |   |         |         |         |   |          |         |         |   |          |         |         |   |         |         |         |   |         |         |         |   |          |         |         |   |         |         |         |   |          |         |         |                                                                                                                                                          |                                                                                                                                                                                                                                                                                                                                                                                                                                                                                                                                                                                                                                                                                                                                                                                                                                                                                                                                                                                                                                                                                                                                                                                                                                                                                                                                                                                                                                                                                    |          |          |         |          |          |          |         |          |          |          |          |          |          |          |         |          |          |          |         |          |          |          |         |          |          |          |          |          |          |          |         |          |          |          |         |          |          |          |          |          |         |         |                                                                                                                                                         |                                                                                                                                                                                                                                                                                                                                                                                                                                                                                                                                                                                                                                                                                                                                                                                                                                                                                                                                                                                                                                                                                                                                                                                                                                                                                                                                                                                                                                                                                                                                                                                                                                                                                                                                                                                                                                                                                                                                                                                                                                                                                                                                                                                                                                                                                               |   |         |          |          |   |         |          |          |   |         |          |          |   |         |          |          |   |         |          |          |   |         |          |          |   |          |          |          |   |         |          |          |   |         |          |          |   |          |          |          |   |         |         |         |   |          |         |         |   |         |         |         |   |          |         |         |   |          |         |         |   |         |         |         |   |         |          |         |   |          |         |         |   |         |         |         |   |          |         |         |   |          |          |          |   |          |          |          |   |          |          |          |   |          |          |          |   |          |          |          |   |          |          |          |   |          |         |          |   |          |         |          |   |          |         |          |   |          |         |          |    |          |         |         |
| H                                                                                                                                                       | -0.75915                                                                                                                                                                                                                                                                                                                                                                                                                                                                                                                                                                                                                                                                                                                                                                                                                                                                                                                                                                                                                                                                                                                                                                                                                                                                                                                                                                                                                                                                                                                                                                                                                                                                                                                                                                                                                                                                                                                                                                                                                                                                                                                                                                                                                                                                               | -1.15092 | 0.13468  |         |          |   |         |         |          |   |         |         |         |   |         |          |          |   |         |         |          |   |         |         |         |   |          |          |          |   |         |         |          |   |         |         |         |   |          |          |         |   |          |         |         |   |          |         |         |   |         |         |         |   |          |         |         |   |          |         |         |   |         |         |         |   |         |         |         |   |          |         |         |   |         |         |         |   |          |         |         |                                                                                                                                                          |                                                                                                                                                                                                                                                                                                                                                                                                                                                                                                                                                                                                                                                                                                                                                                                                                                                                                                                                                                                                                                                                                                                                                                                                                                                                                                                                                                                                                                                                                    |          |          |         |          |          |          |         |          |          |          |          |          |          |          |         |          |          |          |         |          |          |          |         |          |          |          |          |          |          |          |         |          |          |          |         |          |          |          |          |          |         |         |                                                                                                                                                         |                                                                                                                                                                                                                                                                                                                                                                                                                                                                                                                                                                                                                                                                                                                                                                                                                                                                                                                                                                                                                                                                                                                                                                                                                                                                                                                                                                                                                                                                                                                                                                                                                                                                                                                                                                                                                                                                                                                                                                                                                                                                                                                                                                                                                                                                                               |   |         |          |          |   |         |          |          |   |         |          |          |   |         |          |          |   |         |          |          |   |         |          |          |   |          |          |          |   |         |          |          |   |         |          |          |   |          |          |          |   |         |         |         |   |          |         |         |   |         |         |         |   |          |         |         |   |          |         |         |   |         |         |         |   |         |          |         |   |          |         |         |   |         |         |         |   |          |         |         |   |          |          |          |   |          |          |          |   |          |          |          |   |          |          |          |   |          |          |          |   |          |          |          |   |          |         |          |   |          |         |          |   |          |         |          |   |          |         |          |    |          |         |         |
| C                                                                                                                                                       | -0.18567                                                                                                                                                                                                                                                                                                                                                                                                                                                                                                                                                                                                                                                                                                                                                                                                                                                                                                                                                                                                                                                                                                                                                                                                                                                                                                                                                                                                                                                                                                                                                                                                                                                                                                                                                                                                                                                                                                                                                                                                                                                                                                                                                                                                                                                                               | 0.63908  | 2.08932  |         |          |   |         |         |          |   |         |         |         |   |         |          |          |   |         |         |          |   |         |         |         |   |          |          |          |   |         |         |          |   |         |         |         |   |          |          |         |   |          |         |         |   |          |         |         |   |         |         |         |   |          |         |         |   |          |         |         |   |         |         |         |   |         |         |         |   |          |         |         |   |         |         |         |   |          |         |         |                                                                                                                                                          |                                                                                                                                                                                                                                                                                                                                                                                                                                                                                                                                                                                                                                                                                                                                                                                                                                                                                                                                                                                                                                                                                                                                                                                                                                                                                                                                                                                                                                                                                    |          |          |         |          |          |          |         |          |          |          |          |          |          |          |         |          |          |          |         |          |          |          |         |          |          |          |          |          |          |          |         |          |          |          |         |          |          |          |          |          |         |         |                                                                                                                                                         |                                                                                                                                                                                                                                                                                                                                                                                                                                                                                                                                                                                                                                                                                                                                                                                                                                                                                                                                                                                                                                                                                                                                                                                                                                                                                                                                                                                                                                                                                                                                                                                                                                                                                                                                                                                                                                                                                                                                                                                                                                                                                                                                                                                                                                                                                               |   |         |          |          |   |         |          |          |   |         |          |          |   |         |          |          |   |         |          |          |   |         |          |          |   |          |          |          |   |         |          |          |   |         |          |          |   |          |          |          |   |         |         |         |   |          |         |         |   |         |         |         |   |          |         |         |   |          |         |         |   |         |         |         |   |         |          |         |   |          |         |         |   |         |         |         |   |          |         |         |   |          |          |          |   |          |          |          |   |          |          |          |   |          |          |          |   |          |          |          |   |          |          |          |   |          |         |          |   |          |         |          |   |          |         |          |   |          |         |          |    |          |         |         |
| C                                                                                                                                                       | -0.76227                                                                                                                                                                                                                                                                                                                                                                                                                                                                                                                                                                                                                                                                                                                                                                                                                                                                                                                                                                                                                                                                                                                                                                                                                                                                                                                                                                                                                                                                                                                                                                                                                                                                                                                                                                                                                                                                                                                                                                                                                                                                                                                                                                                                                                                                               | 0.54892  | 4.84938  |         |          |   |         |         |          |   |         |         |         |   |         |          |          |   |         |         |          |   |         |         |         |   |          |          |          |   |         |         |          |   |         |         |         |   |          |          |         |   |          |         |         |   |          |         |         |   |         |         |         |   |          |         |         |   |          |         |         |   |         |         |         |   |         |         |         |   |          |         |         |   |         |         |         |   |          |         |         |                                                                                                                                                          |                                                                                                                                                                                                                                                                                                                                                                                                                                                                                                                                                                                                                                                                                                                                                                                                                                                                                                                                                                                                                                                                                                                                                                                                                                                                                                                                                                                                                                                                                    |          |          |         |          |          |          |         |          |          |          |          |          |          |          |         |          |          |          |         |          |          |          |         |          |          |          |          |          |          |          |         |          |          |          |         |          |          |          |          |          |         |         |                                                                                                                                                         |                                                                                                                                                                                                                                                                                                                                                                                                                                                                                                                                                                                                                                                                                                                                                                                                                                                                                                                                                                                                                                                                                                                                                                                                                                                                                                                                                                                                                                                                                                                                                                                                                                                                                                                                                                                                                                                                                                                                                                                                                                                                                                                                                                                                                                                                                               |   |         |          |          |   |         |          |          |   |         |          |          |   |         |          |          |   |         |          |          |   |         |          |          |   |          |          |          |   |         |          |          |   |         |          |          |   |          |          |          |   |         |         |         |   |          |         |         |   |         |         |         |   |          |         |         |   |          |         |         |   |         |         |         |   |         |          |         |   |          |         |         |   |         |         |         |   |          |         |         |   |          |          |          |   |          |          |          |   |          |          |          |   |          |          |          |   |          |          |          |   |          |          |          |   |          |         |          |   |          |         |          |   |          |         |          |   |          |         |          |    |          |         |         |
| C                                                                                                                                                       | 0.81575                                                                                                                                                                                                                                                                                                                                                                                                                                                                                                                                                                                                                                                                                                                                                                                                                                                                                                                                                                                                                                                                                                                                                                                                                                                                                                                                                                                                                                                                                                                                                                                                                                                                                                                                                                                                                                                                                                                                                                                                                                                                                                                                                                                                                                                                                | 0.80287  | 3.05663  |         |          |   |         |         |          |   |         |         |         |   |         |          |          |   |         |         |          |   |         |         |         |   |          |          |          |   |         |         |          |   |         |         |         |   |          |          |         |   |          |         |         |   |          |         |         |   |         |         |         |   |          |         |         |   |          |         |         |   |         |         |         |   |         |         |         |   |          |         |         |   |         |         |         |   |          |         |         |                                                                                                                                                          |                                                                                                                                                                                                                                                                                                                                                                                                                                                                                                                                                                                                                                                                                                                                                                                                                                                                                                                                                                                                                                                                                                                                                                                                                                                                                                                                                                                                                                                                                    |          |          |         |          |          |          |         |          |          |          |          |          |          |          |         |          |          |          |         |          |          |          |         |          |          |          |          |          |          |          |         |          |          |          |         |          |          |          |          |          |         |         |                                                                                                                                                         |                                                                                                                                                                                                                                                                                                                                                                                                                                                                                                                                                                                                                                                                                                                                                                                                                                                                                                                                                                                                                                                                                                                                                                                                                                                                                                                                                                                                                                                                                                                                                                                                                                                                                                                                                                                                                                                                                                                                                                                                                                                                                                                                                                                                                                                                                               |   |         |          |          |   |         |          |          |   |         |          |          |   |         |          |          |   |         |          |          |   |         |          |          |   |          |          |          |   |         |          |          |   |         |          |          |   |          |          |          |   |         |         |         |   |          |         |         |   |         |         |         |   |          |         |         |   |          |         |         |   |         |         |         |   |         |          |         |   |          |         |         |   |         |         |         |   |          |         |         |   |          |          |          |   |          |          |          |   |          |          |          |   |          |          |          |   |          |          |          |   |          |          |          |   |          |         |          |   |          |         |          |   |          |         |          |   |          |         |          |    |          |         |         |
| C                                                                                                                                                       | -1.49252                                                                                                                                                                                                                                                                                                                                                                                                                                                                                                                                                                                                                                                                                                                                                                                                                                                                                                                                                                                                                                                                                                                                                                                                                                                                                                                                                                                                                                                                                                                                                                                                                                                                                                                                                                                                                                                                                                                                                                                                                                                                                                                                                                                                                                                                               | 0.44102  | 2.55688  |         |          |   |         |         |          |   |         |         |         |   |         |          |          |   |         |         |          |   |         |         |         |   |          |          |          |   |         |         |          |   |         |         |         |   |          |          |         |   |          |         |         |   |          |         |         |   |         |         |         |   |          |         |         |   |          |         |         |   |         |         |         |   |         |         |         |   |          |         |         |   |         |         |         |   |          |         |         |                                                                                                                                                          |                                                                                                                                                                                                                                                                                                                                                                                                                                                                                                                                                                                                                                                                                                                                                                                                                                                                                                                                                                                                                                                                                                                                                                                                                                                                                                                                                                                                                                                                                    |          |          |         |          |          |          |         |          |          |          |          |          |          |          |         |          |          |          |         |          |          |          |         |          |          |          |          |          |          |          |         |          |          |          |         |          |          |          |          |          |         |         |                                                                                                                                                         |                                                                                                                                                                                                                                                                                                                                                                                                                                                                                                                                                                                                                                                                                                                                                                                                                                                                                                                                                                                                                                                                                                                                                                                                                                                                                                                                                                                                                                                                                                                                                                                                                                                                                                                                                                                                                                                                                                                                                                                                                                                                                                                                                                                                                                                                                               |   |         |          |          |   |         |          |          |   |         |          |          |   |         |          |          |   |         |          |          |   |         |          |          |   |          |          |          |   |         |          |          |   |         |          |          |   |          |          |          |   |         |         |         |   |          |         |         |   |         |         |         |   |          |         |         |   |          |         |         |   |         |         |         |   |         |          |         |   |          |         |         |   |         |         |         |   |          |         |         |   |          |          |          |   |          |          |          |   |          |          |          |   |          |          |          |   |          |          |          |   |          |          |          |   |          |         |          |   |          |         |          |   |          |         |          |   |          |         |          |    |          |         |         |
| C                                                                                                                                                       | -1.78008                                                                                                                                                                                                                                                                                                                                                                                                                                                                                                                                                                                                                                                                                                                                                                                                                                                                                                                                                                                                                                                                                                                                                                                                                                                                                                                                                                                                                                                                                                                                                                                                                                                                                                                                                                                                                                                                                                                                                                                                                                                                                                                                                                                                                                                                               | 0.39362  | 3.91779  |         |          |   |         |         |          |   |         |         |         |   |         |          |          |   |         |         |          |   |         |         |         |   |          |          |          |   |         |         |          |   |         |         |         |   |          |          |         |   |          |         |         |   |          |         |         |   |         |         |         |   |          |         |         |   |          |         |         |   |         |         |         |   |         |         |         |   |          |         |         |   |         |         |         |   |          |         |         |                                                                                                                                                          |                                                                                                                                                                                                                                                                                                                                                                                                                                                                                                                                                                                                                                                                                                                                                                                                                                                                                                                                                                                                                                                                                                                                                                                                                                                                                                                                                                                                                                                                                    |          |          |         |          |          |          |         |          |          |          |          |          |          |          |         |          |          |          |         |          |          |          |         |          |          |          |          |          |          |          |         |          |          |          |         |          |          |          |          |          |         |         |                                                                                                                                                         |                                                                                                                                                                                                                                                                                                                                                                                                                                                                                                                                                                                                                                                                                                                                                                                                                                                                                                                                                                                                                                                                                                                                                                                                                                                                                                                                                                                                                                                                                                                                                                                                                                                                                                                                                                                                                                                                                                                                                                                                                                                                                                                                                                                                                                                                                               |   |         |          |          |   |         |          |          |   |         |          |          |   |         |          |          |   |         |          |          |   |         |          |          |   |          |          |          |   |         |          |          |   |         |          |          |   |          |          |          |   |         |         |         |   |          |         |         |   |         |         |         |   |          |         |         |   |          |         |         |   |         |         |         |   |         |          |         |   |          |         |         |   |         |         |         |   |          |         |         |   |          |          |          |   |          |          |          |   |          |          |          |   |          |          |          |   |          |          |          |   |          |          |          |   |          |         |          |   |          |         |          |   |          |         |          |   |          |         |          |    |          |         |         |
| C                                                                                                                                                       | 0.54243                                                                                                                                                                                                                                                                                                                                                                                                                                                                                                                                                                                                                                                                                                                                                                                                                                                                                                                                                                                                                                                                                                                                                                                                                                                                                                                                                                                                                                                                                                                                                                                                                                                                                                                                                                                                                                                                                                                                                                                                                                                                                                                                                                                                                                                                                | 0.75937  | 4.41607  |         |          |   |         |         |          |   |         |         |         |   |         |          |          |   |         |         |          |   |         |         |         |   |          |          |          |   |         |         |          |   |         |         |         |   |          |          |         |   |          |         |         |   |          |         |         |   |         |         |         |   |          |         |         |   |          |         |         |   |         |         |         |   |         |         |         |   |          |         |         |   |         |         |         |   |          |         |         |                                                                                                                                                          |                                                                                                                                                                                                                                                                                                                                                                                                                                                                                                                                                                                                                                                                                                                                                                                                                                                                                                                                                                                                                                                                                                                                                                                                                                                                                                                                                                                                                                                                                    |          |          |         |          |          |          |         |          |          |          |          |          |          |          |         |          |          |          |         |          |          |          |         |          |          |          |          |          |          |          |         |          |          |          |         |          |          |          |          |          |         |         |                                                                                                                                                         |                                                                                                                                                                                                                                                                                                                                                                                                                                                                                                                                                                                                                                                                                                                                                                                                                                                                                                                                                                                                                                                                                                                                                                                                                                                                                                                                                                                                                                                                                                                                                                                                                                                                                                                                                                                                                                                                                                                                                                                                                                                                                                                                                                                                                                                                                               |   |         |          |          |   |         |          |          |   |         |          |          |   |         |          |          |   |         |          |          |   |         |          |          |   |          |          |          |   |         |          |          |   |         |          |          |   |          |          |          |   |         |         |         |   |          |         |         |   |         |         |         |   |          |         |         |   |          |         |         |   |         |         |         |   |         |          |         |   |          |         |         |   |         |         |         |   |          |         |         |   |          |          |          |   |          |          |          |   |          |          |          |   |          |          |          |   |          |          |          |   |          |          |          |   |          |         |          |   |          |         |          |   |          |         |          |   |          |         |          |    |          |         |         |
| H                                                                                                                                                       | 1.83118                                                                                                                                                                                                                                                                                                                                                                                                                                                                                                                                                                                                                                                                                                                                                                                                                                                                                                                                                                                                                                                                                                                                                                                                                                                                                                                                                                                                                                                                                                                                                                                                                                                                                                                                                                                                                                                                                                                                                                                                                                                                                                                                                                                                                                                                                | 0.95125  | 2.71386  |         |          |   |         |         |          |   |         |         |         |   |         |          |          |   |         |         |          |   |         |         |         |   |          |          |          |   |         |         |          |   |         |         |         |   |          |          |         |   |          |         |         |   |          |         |         |   |         |         |         |   |          |         |         |   |          |         |         |   |         |         |         |   |         |         |         |   |          |         |         |   |         |         |         |   |          |         |         |                                                                                                                                                          |                                                                                                                                                                                                                                                                                                                                                                                                                                                                                                                                                                                                                                                                                                                                                                                                                                                                                                                                                                                                                                                                                                                                                                                                                                                                                                                                                                                                                                                                                    |          |          |         |          |          |          |         |          |          |          |          |          |          |          |         |          |          |          |         |          |          |          |         |          |          |          |          |          |          |          |         |          |          |          |         |          |          |          |          |          |         |         |                                                                                                                                                         |                                                                                                                                                                                                                                                                                                                                                                                                                                                                                                                                                                                                                                                                                                                                                                                                                                                                                                                                                                                                                                                                                                                                                                                                                                                                                                                                                                                                                                                                                                                                                                                                                                                                                                                                                                                                                                                                                                                                                                                                                                                                                                                                                                                                                                                                                               |   |         |          |          |   |         |          |          |   |         |          |          |   |         |          |          |   |         |          |          |   |         |          |          |   |          |          |          |   |         |          |          |   |         |          |          |   |          |          |          |   |         |         |         |   |          |         |         |   |         |         |         |   |          |         |         |   |          |         |         |   |         |         |         |   |         |          |         |   |          |         |         |   |         |         |         |   |          |         |         |   |          |          |          |   |          |          |          |   |          |          |          |   |          |          |          |   |          |          |          |   |          |          |          |   |          |         |          |   |          |         |          |   |          |         |          |   |          |         |          |    |          |         |         |
| H                                                                                                                                                       | -2.80183                                                                                                                                                                                                                                                                                                                                                                                                                                                                                                                                                                                                                                                                                                                                                                                                                                                                                                                                                                                                                                                                                                                                                                                                                                                                                                                                                                                                                                                                                                                                                                                                                                                                                                                                                                                                                                                                                                                                                                                                                                                                                                                                                                                                                                                                               | 0.24576  | 4.23759  |         |          |   |         |         |          |   |         |         |         |   |         |          |          |   |         |         |          |   |         |         |         |   |          |          |          |   |         |         |          |   |         |         |         |   |          |          |         |   |          |         |         |   |          |         |         |   |         |         |         |   |          |         |         |   |          |         |         |   |         |         |         |   |         |         |         |   |          |         |         |   |         |         |         |   |          |         |         |                                                                                                                                                          |                                                                                                                                                                                                                                                                                                                                                                                                                                                                                                                                                                                                                                                                                                                                                                                                                                                                                                                                                                                                                                                                                                                                                                                                                                                                                                                                                                                                                                                                                    |          |          |         |          |          |          |         |          |          |          |          |          |          |          |         |          |          |          |         |          |          |          |         |          |          |          |          |          |          |          |         |          |          |          |         |          |          |          |          |          |         |         |                                                                                                                                                         |                                                                                                                                                                                                                                                                                                                                                                                                                                                                                                                                                                                                                                                                                                                                                                                                                                                                                                                                                                                                                                                                                                                                                                                                                                                                                                                                                                                                                                                                                                                                                                                                                                                                                                                                                                                                                                                                                                                                                                                                                                                                                                                                                                                                                                                                                               |   |         |          |          |   |         |          |          |   |         |          |          |   |         |          |          |   |         |          |          |   |         |          |          |   |          |          |          |   |         |          |          |   |         |          |          |   |          |          |          |   |         |         |         |   |          |         |         |   |         |         |         |   |          |         |         |   |          |         |         |   |         |         |         |   |         |          |         |   |          |         |         |   |         |         |         |   |          |         |         |   |          |          |          |   |          |          |          |   |          |          |          |   |          |          |          |   |          |          |          |   |          |          |          |   |          |         |          |   |          |         |          |   |          |         |          |   |          |         |          |    |          |         |         |
| H                                                                                                                                                       | 1.34423                                                                                                                                                                                                                                                                                                                                                                                                                                                                                                                                                                                                                                                                                                                                                                                                                                                                                                                                                                                                                                                                                                                                                                                                                                                                                                                                                                                                                                                                                                                                                                                                                                                                                                                                                                                                                                                                                                                                                                                                                                                                                                                                                                                                                                                                                | 0.88236  | 5.13191  |         |          |   |         |         |          |   |         |         |         |   |         |          |          |   |         |         |          |   |         |         |         |   |          |          |          |   |         |         |          |   |         |         |         |   |          |          |         |   |          |         |         |   |          |         |         |   |         |         |         |   |          |         |         |   |          |         |         |   |         |         |         |   |         |         |         |   |          |         |         |   |         |         |         |   |          |         |         |                                                                                                                                                          |                                                                                                                                                                                                                                                                                                                                                                                                                                                                                                                                                                                                                                                                                                                                                                                                                                                                                                                                                                                                                                                                                                                                                                                                                                                                                                                                                                                                                                                                                    |          |          |         |          |          |          |         |          |          |          |          |          |          |          |         |          |          |          |         |          |          |          |         |          |          |          |          |          |          |          |         |          |          |          |         |          |          |          |          |          |         |         |                                                                                                                                                         |                                                                                                                                                                                                                                                                                                                                                                                                                                                                                                                                                                                                                                                                                                                                                                                                                                                                                                                                                                                                                                                                                                                                                                                                                                                                                                                                                                                                                                                                                                                                                                                                                                                                                                                                                                                                                                                                                                                                                                                                                                                                                                                                                                                                                                                                                               |   |         |          |          |   |         |          |          |   |         |          |          |   |         |          |          |   |         |          |          |   |         |          |          |   |          |          |          |   |         |          |          |   |         |          |          |   |          |          |          |   |         |         |         |   |          |         |         |   |         |         |         |   |          |         |         |   |          |         |         |   |         |         |         |   |         |          |         |   |          |         |         |   |         |         |         |   |          |         |         |   |          |          |          |   |          |          |          |   |          |          |          |   |          |          |          |   |          |          |          |   |          |          |          |   |          |         |          |   |          |         |          |   |          |         |          |   |          |         |          |    |          |         |         |
| H                                                                                                                                                       | -0.99280                                                                                                                                                                                                                                                                                                                                                                                                                                                                                                                                                                                                                                                                                                                                                                                                                                                                                                                                                                                                                                                                                                                                                                                                                                                                                                                                                                                                                                                                                                                                                                                                                                                                                                                                                                                                                                                                                                                                                                                                                                                                                                                                                                                                                                                                               | 0.50897  | 5.90565  |         |          |   |         |         |          |   |         |         |         |   |         |          |          |   |         |         |          |   |         |         |         |   |          |          |          |   |         |         |          |   |         |         |         |   |          |          |         |   |          |         |         |   |          |         |         |   |         |         |         |   |          |         |         |   |          |         |         |   |         |         |         |   |         |         |         |   |          |         |         |   |         |         |         |   |          |         |         |                                                                                                                                                          |                                                                                                                                                                                                                                                                                                                                                                                                                                                                                                                                                                                                                                                                                                                                                                                                                                                                                                                                                                                                                                                                                                                                                                                                                                                                                                                                                                                                                                                                                    |          |          |         |          |          |          |         |          |          |          |          |          |          |          |         |          |          |          |         |          |          |          |         |          |          |          |          |          |          |          |         |          |          |          |         |          |          |          |          |          |         |         |                                                                                                                                                         |                                                                                                                                                                                                                                                                                                                                                                                                                                                                                                                                                                                                                                                                                                                                                                                                                                                                                                                                                                                                                                                                                                                                                                                                                                                                                                                                                                                                                                                                                                                                                                                                                                                                                                                                                                                                                                                                                                                                                                                                                                                                                                                                                                                                                                                                                               |   |         |          |          |   |         |          |          |   |         |          |          |   |         |          |          |   |         |          |          |   |         |          |          |   |          |          |          |   |         |          |          |   |         |          |          |   |          |          |          |   |         |         |         |   |          |         |         |   |         |         |         |   |          |         |         |   |          |         |         |   |         |         |         |   |         |          |         |   |          |         |         |   |         |         |         |   |          |         |         |   |          |          |          |   |          |          |          |   |          |          |          |   |          |          |          |   |          |          |          |   |          |          |          |   |          |         |          |   |          |         |          |   |          |         |          |   |          |         |          |    |          |         |         |
| C                                                                                                                                                       | -0.19254                                                                                                                                                                                                                                                                                                                                                                                                                                                                                                                                                                                                                                                                                                                                                                                                                                                                                                                                                                                                                                                                                                                                                                                                                                                                                                                                                                                                                                                                                                                                                                                                                                                                                                                                                                                                                                                                                                                                                                                                                                                                                                                                                                                                                                                                               | -1.40970 | -2.50478 |         |          |   |         |         |          |   |         |         |         |   |         |          |          |   |         |         |          |   |         |         |         |   |          |          |          |   |         |         |          |   |         |         |         |   |          |          |         |   |          |         |         |   |          |         |         |   |         |         |         |   |          |         |         |   |          |         |         |   |         |         |         |   |         |         |         |   |          |         |         |   |         |         |         |   |          |         |         |                                                                                                                                                          |                                                                                                                                                                                                                                                                                                                                                                                                                                                                                                                                                                                                                                                                                                                                                                                                                                                                                                                                                                                                                                                                                                                                                                                                                                                                                                                                                                                                                                                                                    |          |          |         |          |          |          |         |          |          |          |          |          |          |          |         |          |          |          |         |          |          |          |         |          |          |          |          |          |          |          |         |          |          |          |         |          |          |          |          |          |         |         |                                                                                                                                                         |                                                                                                                                                                                                                                                                                                                                                                                                                                                                                                                                                                                                                                                                                                                                                                                                                                                                                                                                                                                                                                                                                                                                                                                                                                                                                                                                                                                                                                                                                                                                                                                                                                                                                                                                                                                                                                                                                                                                                                                                                                                                                                                                                                                                                                                                                               |   |         |          |          |   |         |          |          |   |         |          |          |   |         |          |          |   |         |          |          |   |         |          |          |   |          |          |          |   |         |          |          |   |         |          |          |   |          |          |          |   |         |         |         |   |          |         |         |   |         |         |         |   |          |         |         |   |          |         |         |   |         |         |         |   |         |          |         |   |          |         |         |   |         |         |         |   |          |         |         |   |          |          |          |   |          |          |          |   |          |          |          |   |          |          |          |   |          |          |          |   |          |          |          |   |          |         |          |   |          |         |          |   |          |         |          |   |          |         |          |    |          |         |         |
| H                                                                                                                                                       | 0.22925                                                                                                                                                                                                                                                                                                                                                                                                                                                                                                                                                                                                                                                                                                                                                                                                                                                                                                                                                                                                                                                                                                                                                                                                                                                                                                                                                                                                                                                                                                                                                                                                                                                                                                                                                                                                                                                                                                                                                                                                                                                                                                                                                                                                                                                                                | -1.18376 | -3.48822 |         |          |   |         |         |          |   |         |         |         |   |         |          |          |   |         |         |          |   |         |         |         |   |          |          |          |   |         |         |          |   |         |         |         |   |          |          |         |   |          |         |         |   |          |         |         |   |         |         |         |   |          |         |         |   |          |         |         |   |         |         |         |   |         |         |         |   |          |         |         |   |         |         |         |   |          |         |         |                                                                                                                                                          |                                                                                                                                                                                                                                                                                                                                                                                                                                                                                                                                                                                                                                                                                                                                                                                                                                                                                                                                                                                                                                                                                                                                                                                                                                                                                                                                                                                                                                                                                    |          |          |         |          |          |          |         |          |          |          |          |          |          |          |         |          |          |          |         |          |          |          |         |          |          |          |          |          |          |          |         |          |          |          |         |          |          |          |          |          |         |         |                                                                                                                                                         |                                                                                                                                                                                                                                                                                                                                                                                                                                                                                                                                                                                                                                                                                                                                                                                                                                                                                                                                                                                                                                                                                                                                                                                                                                                                                                                                                                                                                                                                                                                                                                                                                                                                                                                                                                                                                                                                                                                                                                                                                                                                                                                                                                                                                                                                                               |   |         |          |          |   |         |          |          |   |         |          |          |   |         |          |          |   |         |          |          |   |         |          |          |   |          |          |          |   |         |          |          |   |         |          |          |   |          |          |          |   |         |         |         |   |          |         |         |   |         |         |         |   |          |         |         |   |          |         |         |   |         |         |         |   |         |          |         |   |          |         |         |   |         |         |         |   |          |         |         |   |          |          |          |   |          |          |          |   |          |          |          |   |          |          |          |   |          |          |          |   |          |          |          |   |          |         |          |   |          |         |          |   |          |         |          |   |          |         |          |    |          |         |         |
| C                                                                                                                                                       | 0.36310                                                                                                                                                                                                                                                                                                                                                                                                                                                                                                                                                                                                                                                                                                                                                                                                                                                                                                                                                                                                                                                                                                                                                                                                                                                                                                                                                                                                                                                                                                                                                                                                                                                                                                                                                                                                                                                                                                                                                                                                                                                                                                                                                                                                                                                                                | -2.76513 | -2.04860 |         |          |   |         |         |          |   |         |         |         |   |         |          |          |   |         |         |          |   |         |         |         |   |          |          |          |   |         |         |          |   |         |         |         |   |          |          |         |   |          |         |         |   |          |         |         |   |         |         |         |   |          |         |         |   |          |         |         |   |         |         |         |   |         |         |         |   |          |         |         |   |         |         |         |   |          |         |         |                                                                                                                                                          |                                                                                                                                                                                                                                                                                                                                                                                                                                                                                                                                                                                                                                                                                                                                                                                                                                                                                                                                                                                                                                                                                                                                                                                                                                                                                                                                                                                                                                                                                    |          |          |         |          |          |          |         |          |          |          |          |          |          |          |         |          |          |          |         |          |          |          |         |          |          |          |          |          |          |          |         |          |          |          |         |          |          |          |          |          |         |         |                                                                                                                                                         |                                                                                                                                                                                                                                                                                                                                                                                                                                                                                                                                                                                                                                                                                                                                                                                                                                                                                                                                                                                                                                                                                                                                                                                                                                                                                                                                                                                                                                                                                                                                                                                                                                                                                                                                                                                                                                                                                                                                                                                                                                                                                                                                                                                                                                                                                               |   |         |          |          |   |         |          |          |   |         |          |          |   |         |          |          |   |         |          |          |   |         |          |          |   |          |          |          |   |         |          |          |   |         |          |          |   |          |          |          |   |         |         |         |   |          |         |         |   |         |         |         |   |          |         |         |   |          |         |         |   |         |         |         |   |         |          |         |   |          |         |         |   |         |         |         |   |          |         |         |   |          |          |          |   |          |          |          |   |          |          |          |   |          |          |          |   |          |          |          |   |          |          |          |   |          |         |          |   |          |         |          |   |          |         |          |   |          |         |          |    |          |         |         |
| H                                                                                                                                                       | -0.04113                                                                                                                                                                                                                                                                                                                                                                                                                                                                                                                                                                                                                                                                                                                                                                                                                                                                                                                                                                                                                                                                                                                                                                                                                                                                                                                                                                                                                                                                                                                                                                                                                                                                                                                                                                                                                                                                                                                                                                                                                                                                                                                                                                                                                                                                               | -3.03203 | -1.06933 |         |          |   |         |         |          |   |         |         |         |   |         |          |          |   |         |         |          |   |         |         |         |   |          |          |          |   |         |         |          |   |         |         |         |   |          |          |         |   |          |         |         |   |          |         |         |   |         |         |         |   |          |         |         |   |          |         |         |   |         |         |         |   |         |         |         |   |          |         |         |   |         |         |         |   |          |         |         |                                                                                                                                                          |                                                                                                                                                                                                                                                                                                                                                                                                                                                                                                                                                                                                                                                                                                                                                                                                                                                                                                                                                                                                                                                                                                                                                                                                                                                                                                                                                                                                                                                                                    |          |          |         |          |          |          |         |          |          |          |          |          |          |          |         |          |          |          |         |          |          |          |         |          |          |          |          |          |          |          |         |          |          |          |         |          |          |          |          |          |         |         |                                                                                                                                                         |                                                                                                                                                                                                                                                                                                                                                                                                                                                                                                                                                                                                                                                                                                                                                                                                                                                                                                                                                                                                                                                                                                                                                                                                                                                                                                                                                                                                                                                                                                                                                                                                                                                                                                                                                                                                                                                                                                                                                                                                                                                                                                                                                                                                                                                                                               |   |         |          |          |   |         |          |          |   |         |          |          |   |         |          |          |   |         |          |          |   |         |          |          |   |          |          |          |   |         |          |          |   |         |          |          |   |          |          |          |   |         |         |         |   |          |         |         |   |         |         |         |   |          |         |         |   |          |         |         |   |         |         |         |   |         |          |         |   |          |         |         |   |         |         |         |   |          |         |         |   |          |          |          |   |          |          |          |   |          |          |          |   |          |          |          |   |          |          |          |   |          |          |          |   |          |         |          |   |          |         |          |   |          |         |          |   |          |         |          |    |          |         |         |
| H                                                                                                                                                       | 1.45160                                                                                                                                                                                                                                                                                                                                                                                                                                                                                                                                                                                                                                                                                                                                                                                                                                                                                                                                                                                                                                                                                                                                                                                                                                                                                                                                                                                                                                                                                                                                                                                                                                                                                                                                                                                                                                                                                                                                                                                                                                                                                                                                                                                                                                                                                | -2.73848 | -1.96986 |         |          |   |         |         |          |   |         |         |         |   |         |          |          |   |         |         |          |   |         |         |         |   |          |          |          |   |         |         |          |   |         |         |         |   |          |          |         |   |          |         |         |   |          |         |         |   |         |         |         |   |          |         |         |   |          |         |         |   |         |         |         |   |         |         |         |   |          |         |         |   |         |         |         |   |          |         |         |                                                                                                                                                          |                                                                                                                                                                                                                                                                                                                                                                                                                                                                                                                                                                                                                                                                                                                                                                                                                                                                                                                                                                                                                                                                                                                                                                                                                                                                                                                                                                                                                                                                                    |          |          |         |          |          |          |         |          |          |          |          |          |          |          |         |          |          |          |         |          |          |          |         |          |          |          |          |          |          |          |         |          |          |          |         |          |          |          |          |          |         |         |                                                                                                                                                         |                                                                                                                                                                                                                                                                                                                                                                                                                                                                                                                                                                                                                                                                                                                                                                                                                                                                                                                                                                                                                                                                                                                                                                                                                                                                                                                                                                                                                                                                                                                                                                                                                                                                                                                                                                                                                                                                                                                                                                                                                                                                                                                                                                                                                                                                                               |   |         |          |          |   |         |          |          |   |         |          |          |   |         |          |          |   |         |          |          |   |         |          |          |   |          |          |          |   |         |          |          |   |         |          |          |   |          |          |          |   |         |         |         |   |          |         |         |   |         |         |         |   |          |         |         |   |          |         |         |   |         |         |         |   |         |          |         |   |          |         |         |   |         |         |         |   |          |         |         |   |          |          |          |   |          |          |          |   |          |          |          |   |          |          |          |   |          |          |          |   |          |          |          |   |          |         |          |   |          |         |          |   |          |         |          |   |          |         |          |    |          |         |         |
| H                                                                                                                                                       | 0.08251                                                                                                                                                                                                                                                                                                                                                                                                                                                                                                                                                                                                                                                                                                                                                                                                                                                                                                                                                                                                                                                                                                                                                                                                                                                                                                                                                                                                                                                                                                                                                                                                                                                                                                                                                                                                                                                                                                                                                                                                                                                                                                                                                                                                                                                                                | -3.54933 | -2.75567 |         |          |   |         |         |          |   |         |         |         |   |         |          |          |   |         |         |          |   |         |         |         |   |          |          |          |   |         |         |          |   |         |         |         |   |          |          |         |   |          |         |         |   |          |         |         |   |         |         |         |   |          |         |         |   |          |         |         |   |         |         |         |   |         |         |         |   |          |         |         |   |         |         |         |   |          |         |         |                                                                                                                                                          |                                                                                                                                                                                                                                                                                                                                                                                                                                                                                                                                                                                                                                                                                                                                                                                                                                                                                                                                                                                                                                                                                                                                                                                                                                                                                                                                                                                                                                                                                    |          |          |         |          |          |          |         |          |          |          |          |          |          |          |         |          |          |          |         |          |          |          |         |          |          |          |          |          |          |          |         |          |          |          |         |          |          |          |          |          |         |         |                                                                                                                                                         |                                                                                                                                                                                                                                                                                                                                                                                                                                                                                                                                                                                                                                                                                                                                                                                                                                                                                                                                                                                                                                                                                                                                                                                                                                                                                                                                                                                                                                                                                                                                                                                                                                                                                                                                                                                                                                                                                                                                                                                                                                                                                                                                                                                                                                                                                               |   |         |          |          |   |         |          |          |   |         |          |          |   |         |          |          |   |         |          |          |   |         |          |          |   |          |          |          |   |         |          |          |   |         |          |          |   |          |          |          |   |         |         |         |   |          |         |         |   |         |         |         |   |          |         |         |   |          |         |         |   |         |         |         |   |         |          |         |   |          |         |         |   |         |         |         |   |          |         |         |   |          |          |          |   |          |          |          |   |          |          |          |   |          |          |          |   |          |          |          |   |          |          |          |   |          |         |          |   |          |         |          |   |          |         |          |   |          |         |          |    |          |         |         |
| C                                                                                                                                                       | -1.71948                                                                                                                                                                                                                                                                                                                                                                                                                                                                                                                                                                                                                                                                                                                                                                                                                                                                                                                                                                                                                                                                                                                                                                                                                                                                                                                                                                                                                                                                                                                                                                                                                                                                                                                                                                                                                                                                                                                                                                                                                                                                                                                                                                                                                                                                               | -1.47614 | -2.64335 |         |          |   |         |         |          |   |         |         |         |   |         |          |          |   |         |         |          |   |         |         |         |   |          |          |          |   |         |         |          |   |         |         |         |   |          |          |         |   |          |         |         |   |          |         |         |   |         |         |         |   |          |         |         |   |          |         |         |   |         |         |         |   |         |         |         |   |          |         |         |   |         |         |         |   |          |         |         |                                                                                                                                                          |                                                                                                                                                                                                                                                                                                                                                                                                                                                                                                                                                                                                                                                                                                                                                                                                                                                                                                                                                                                                                                                                                                                                                                                                                                                                                                                                                                                                                                                                                    |          |          |         |          |          |          |         |          |          |          |          |          |          |          |         |          |          |          |         |          |          |          |         |          |          |          |          |          |          |          |         |          |          |          |         |          |          |          |          |          |         |         |                                                                                                                                                         |                                                                                                                                                                                                                                                                                                                                                                                                                                                                                                                                                                                                                                                                                                                                                                                                                                                                                                                                                                                                                                                                                                                                                                                                                                                                                                                                                                                                                                                                                                                                                                                                                                                                                                                                                                                                                                                                                                                                                                                                                                                                                                                                                                                                                                                                                               |   |         |          |          |   |         |          |          |   |         |          |          |   |         |          |          |   |         |          |          |   |         |          |          |   |          |          |          |   |         |          |          |   |         |          |          |   |          |          |          |   |         |         |         |   |          |         |         |   |         |         |         |   |          |         |         |   |          |         |         |   |         |         |         |   |         |          |         |   |          |         |         |   |         |         |         |   |          |         |         |   |          |          |          |   |          |          |          |   |          |          |          |   |          |          |          |   |          |          |          |   |          |          |          |   |          |         |          |   |          |         |          |   |          |         |          |   |          |         |          |    |          |         |         |
| H                                                                                                                                                       | -2.17946                                                                                                                                                                                                                                                                                                                                                                                                                                                                                                                                                                                                                                                                                                                                                                                                                                                                                                                                                                                                                                                                                                                                                                                                                                                                                                                                                                                                                                                                                                                                                                                                                                                                                                                                                                                                                                                                                                                                                                                                                                                                                                                                                                                                                                                                               | -1.69420 | -1.67664 |         |          |   |         |         |          |   |         |         |         |   |         |          |          |   |         |         |          |   |         |         |         |   |          |          |          |   |         |         |          |   |         |         |         |   |          |          |         |   |          |         |         |   |          |         |         |   |         |         |         |   |          |         |         |   |          |         |         |   |         |         |         |   |         |         |         |   |          |         |         |   |         |         |         |   |          |         |         |                                                                                                                                                          |                                                                                                                                                                                                                                                                                                                                                                                                                                                                                                                                                                                                                                                                                                                                                                                                                                                                                                                                                                                                                                                                                                                                                                                                                                                                                                                                                                                                                                                                                    |          |          |         |          |          |          |         |          |          |          |          |          |          |          |         |          |          |          |         |          |          |          |         |          |          |          |          |          |          |          |         |          |          |          |         |          |          |          |          |          |         |         |                                                                                                                                                         |                                                                                                                                                                                                                                                                                                                                                                                                                                                                                                                                                                                                                                                                                                                                                                                                                                                                                                                                                                                                                                                                                                                                                                                                                                                                                                                                                                                                                                                                                                                                                                                                                                                                                                                                                                                                                                                                                                                                                                                                                                                                                                                                                                                                                                                                                               |   |         |          |          |   |         |          |          |   |         |          |          |   |         |          |          |   |         |          |          |   |         |          |          |   |          |          |          |   |         |          |          |   |         |          |          |   |          |          |          |   |         |         |         |   |          |         |         |   |         |         |         |   |          |         |         |   |          |         |         |   |         |         |         |   |         |          |         |   |          |         |         |   |         |         |         |   |          |         |         |   |          |          |          |   |          |          |          |   |          |          |          |   |          |          |          |   |          |          |          |   |          |          |          |   |          |         |          |   |          |         |          |   |          |         |          |   |          |         |          |    |          |         |         |
| H                                                                                                                                                       | -2.00550                                                                                                                                                                                                                                                                                                                                                                                                                                                                                                                                                                                                                                                                                                                                                                                                                                                                                                                                                                                                                                                                                                                                                                                                                                                                                                                                                                                                                                                                                                                                                                                                                                                                                                                                                                                                                                                                                                                                                                                                                                                                                                                                                                                                                                                                               | -2.26526 | -3.34289 |         |          |   |         |         |          |   |         |         |         |   |         |          |          |   |         |         |          |   |         |         |         |   |          |          |          |   |         |         |          |   |         |         |         |   |          |          |         |   |          |         |         |   |          |         |         |   |         |         |         |   |          |         |         |   |          |         |         |   |         |         |         |   |         |         |         |   |          |         |         |   |         |         |         |   |          |         |         |                                                                                                                                                          |                                                                                                                                                                                                                                                                                                                                                                                                                                                                                                                                                                                                                                                                                                                                                                                                                                                                                                                                                                                                                                                                                                                                                                                                                                                                                                                                                                                                                                                                                    |          |          |         |          |          |          |         |          |          |          |          |          |          |          |         |          |          |          |         |          |          |          |         |          |          |          |          |          |          |          |         |          |          |          |         |          |          |          |          |          |         |         |                                                                                                                                                         |                                                                                                                                                                                                                                                                                                                                                                                                                                                                                                                                                                                                                                                                                                                                                                                                                                                                                                                                                                                                                                                                                                                                                                                                                                                                                                                                                                                                                                                                                                                                                                                                                                                                                                                                                                                                                                                                                                                                                                                                                                                                                                                                                                                                                                                                                               |   |         |          |          |   |         |          |          |   |         |          |          |   |         |          |          |   |         |          |          |   |         |          |          |   |          |          |          |   |         |          |          |   |         |          |          |   |          |          |          |   |         |         |         |   |          |         |         |   |         |         |         |   |          |         |         |   |          |         |         |   |         |         |         |   |         |          |         |   |          |         |         |   |         |         |         |   |          |         |         |   |          |          |          |   |          |          |          |   |          |          |          |   |          |          |          |   |          |          |          |   |          |          |          |   |          |         |          |   |          |         |          |   |          |         |          |   |          |         |          |    |          |         |         |
| H                                                                                                                                                       | -2.12315                                                                                                                                                                                                                                                                                                                                                                                                                                                                                                                                                                                                                                                                                                                                                                                                                                                                                                                                                                                                                                                                                                                                                                                                                                                                                                                                                                                                                                                                                                                                                                                                                                                                                                                                                                                                                                                                                                                                                                                                                                                                                                                                                                                                                                                                               | -0.52744 | -3.00168 |         |          |   |         |         |          |   |         |         |         |   |         |          |          |   |         |         |          |   |         |         |         |   |          |          |          |   |         |         |          |   |         |         |         |   |          |          |         |   |          |         |         |   |          |         |         |   |         |         |         |   |          |         |         |   |          |         |         |   |         |         |         |   |         |         |         |   |          |         |         |   |         |         |         |   |          |         |         |                                                                                                                                                          |                                                                                                                                                                                                                                                                                                                                                                                                                                                                                                                                                                                                                                                                                                                                                                                                                                                                                                                                                                                                                                                                                                                                                                                                                                                                                                                                                                                                                                                                                    |          |          |         |          |          |          |         |          |          |          |          |          |          |          |         |          |          |          |         |          |          |          |         |          |          |          |          |          |          |          |         |          |          |          |         |          |          |          |          |          |         |         |                                                                                                                                                         |                                                                                                                                                                                                                                                                                                                                                                                                                                                                                                                                                                                                                                                                                                                                                                                                                                                                                                                                                                                                                                                                                                                                                                                                                                                                                                                                                                                                                                                                                                                                                                                                                                                                                                                                                                                                                                                                                                                                                                                                                                                                                                                                                                                                                                                                                               |   |         |          |          |   |         |          |          |   |         |          |          |   |         |          |          |   |         |          |          |   |         |          |          |   |          |          |          |   |         |          |          |   |         |          |          |   |          |          |          |   |         |         |         |   |          |         |         |   |         |         |         |   |          |         |         |   |          |         |         |   |         |         |         |   |         |          |         |   |          |         |         |   |         |         |         |   |          |         |         |   |          |          |          |   |          |          |          |   |          |          |          |   |          |          |          |   |          |          |          |   |          |          |          |   |          |         |          |   |          |         |          |   |          |         |          |   |          |         |          |    |          |         |         |
| Cl                                                                                                                                                      | -2.84704                                                                                                                                                                                                                                                                                                                                                                                                                                                                                                                                                                                                                                                                                                                                                                                                                                                                                                                                                                                                                                                                                                                                                                                                                                                                                                                                                                                                                                                                                                                                                                                                                                                                                                                                                                                                                                                                                                                                                                                                                                                                                                                                                                                                                                                                               | 0.29956  | 1.45339  |         |          |   |         |         |          |   |         |         |         |   |         |          |          |   |         |         |          |   |         |         |         |   |          |          |          |   |         |         |          |   |         |         |         |   |          |          |         |   |          |         |         |   |          |         |         |   |         |         |         |   |          |         |         |   |          |         |         |   |         |         |         |   |         |         |         |   |          |         |         |   |         |         |         |   |          |         |         |                                                                                                                                                          |                                                                                                                                                                                                                                                                                                                                                                                                                                                                                                                                                                                                                                                                                                                                                                                                                                                                                                                                                                                                                                                                                                                                                                                                                                                                                                                                                                                                                                                                                    |          |          |         |          |          |          |         |          |          |          |          |          |          |          |         |          |          |          |         |          |          |          |         |          |          |          |          |          |          |          |         |          |          |          |         |          |          |          |          |          |         |         |                                                                                                                                                         |                                                                                                                                                                                                                                                                                                                                                                                                                                                                                                                                                                                                                                                                                                                                                                                                                                                                                                                                                                                                                                                                                                                                                                                                                                                                                                                                                                                                                                                                                                                                                                                                                                                                                                                                                                                                                                                                                                                                                                                                                                                                                                                                                                                                                                                                                               |   |         |          |          |   |         |          |          |   |         |          |          |   |         |          |          |   |         |          |          |   |         |          |          |   |          |          |          |   |         |          |          |   |         |          |          |   |          |          |          |   |         |         |         |   |          |         |         |   |         |         |         |   |          |         |         |   |          |         |         |   |         |         |         |   |         |          |         |   |          |         |         |   |         |         |         |   |          |         |         |   |          |          |          |   |          |          |          |   |          |          |          |   |          |          |          |   |          |          |          |   |          |          |          |   |          |         |          |   |          |         |          |   |          |         |          |   |          |         |          |    |          |         |         |
| H                                                                                                                                                       | 2.19014                                                                                                                                                                                                                                                                                                                                                                                                                                                                                                                                                                                                                                                                                                                                                                                                                                                                                                                                                                                                                                                                                                                                                                                                                                                                                                                                                                                                                                                                                                                                                                                                                                                                                                                                                                                                                                                                                                                                                                                                                                                                                                                                                                                                                                                                                | -0.00129 | -3.73445 |         |          |   |         |         |          |   |         |         |         |   |         |          |          |   |         |         |          |   |         |         |         |   |          |          |          |   |         |         |          |   |         |         |         |   |          |          |         |   |          |         |         |   |          |         |         |   |         |         |         |   |          |         |         |   |          |         |         |   |         |         |         |   |         |         |         |   |          |         |         |   |         |         |         |   |          |         |         |                                                                                                                                                          |                                                                                                                                                                                                                                                                                                                                                                                                                                                                                                                                                                                                                                                                                                                                                                                                                                                                                                                                                                                                                                                                                                                                                                                                                                                                                                                                                                                                                                                                                    |          |          |         |          |          |          |         |          |          |          |          |          |          |          |         |          |          |          |         |          |          |          |         |          |          |          |          |          |          |          |         |          |          |          |         |          |          |          |          |          |         |         |                                                                                                                                                         |                                                                                                                                                                                                                                                                                                                                                                                                                                                                                                                                                                                                                                                                                                                                                                                                                                                                                                                                                                                                                                                                                                                                                                                                                                                                                                                                                                                                                                                                                                                                                                                                                                                                                                                                                                                                                                                                                                                                                                                                                                                                                                                                                                                                                                                                                               |   |         |          |          |   |         |          |          |   |         |          |          |   |         |          |          |   |         |          |          |   |         |          |          |   |          |          |          |   |         |          |          |   |         |          |          |   |          |          |          |   |         |         |         |   |          |         |         |   |         |         |         |   |          |         |         |   |          |         |         |   |         |         |         |   |         |          |         |   |          |         |         |   |         |         |         |   |          |         |         |   |          |          |          |   |          |          |          |   |          |          |          |   |          |          |          |   |          |          |          |   |          |          |          |   |          |         |          |   |          |         |          |   |          |         |          |   |          |         |          |    |          |         |         |
| C                                                                                                                                                       | 1.85182                                                                                                                                                                                                                                                                                                                                                                                                                                                                                                                                                                                                                                                                                                                                                                                                                                                                                                                                                                                                                                                                                                                                                                                                                                                                                                                                                                                                                                                                                                                                                                                                                                                                                                                                                                                                                                                                                                                                                                                                                                                                                                                                                                                                                                                                                | -0.00084 | -2.70535 |         |          |   |         |         |          |   |         |         |         |   |         |          |          |   |         |         |          |   |         |         |         |   |          |          |          |   |         |         |          |   |         |         |         |   |          |          |         |   |          |         |         |   |          |         |         |   |         |         |         |   |          |         |         |   |          |         |         |   |         |         |         |   |         |         |         |   |          |         |         |   |         |         |         |   |          |         |         |                                                                                                                                                          |                                                                                                                                                                                                                                                                                                                                                                                                                                                                                                                                                                                                                                                                                                                                                                                                                                                                                                                                                                                                                                                                                                                                                                                                                                                                                                                                                                                                                                                                                    |          |          |         |          |          |          |         |          |          |          |          |          |          |          |         |          |          |          |         |          |          |          |         |          |          |          |          |          |          |          |         |          |          |          |         |          |          |          |          |          |         |         |                                                                                                                                                         |                                                                                                                                                                                                                                                                                                                                                                                                                                                                                                                                                                                                                                                                                                                                                                                                                                                                                                                                                                                                                                                                                                                                                                                                                                                                                                                                                                                                                                                                                                                                                                                                                                                                                                                                                                                                                                                                                                                                                                                                                                                                                                                                                                                                                                                                                               |   |         |          |          |   |         |          |          |   |         |          |          |   |         |          |          |   |         |          |          |   |         |          |          |   |          |          |          |   |         |          |          |   |         |          |          |   |          |          |          |   |         |         |         |   |          |         |         |   |         |         |         |   |          |         |         |   |          |         |         |   |         |         |         |   |         |          |         |   |          |         |         |   |         |         |         |   |          |         |         |   |          |          |          |   |          |          |          |   |          |          |          |   |          |          |          |   |          |          |          |   |          |          |          |   |          |         |          |   |          |         |          |   |          |         |          |   |          |         |          |    |          |         |         |
| C                                                                                                                                                       | 0.96759                                                                                                                                                                                                                                                                                                                                                                                                                                                                                                                                                                                                                                                                                                                                                                                                                                                                                                                                                                                                                                                                                                                                                                                                                                                                                                                                                                                                                                                                                                                                                                                                                                                                                                                                                                                                                                                                                                                                                                                                                                                                                                                                                                                                                                                                                | 0.00030  | -0.00850 |         |          |   |         |         |          |   |         |         |         |   |         |          |          |   |         |         |          |   |         |         |         |   |          |          |          |   |         |         |          |   |         |         |         |   |          |          |         |   |          |         |         |   |          |         |         |   |         |         |         |   |          |         |         |   |          |         |         |   |         |         |         |   |         |         |         |   |          |         |         |   |         |         |         |   |          |         |         |                                                                                                                                                          |                                                                                                                                                                                                                                                                                                                                                                                                                                                                                                                                                                                                                                                                                                                                                                                                                                                                                                                                                                                                                                                                                                                                                                                                                                                                                                                                                                                                                                                                                    |          |          |         |          |          |          |         |          |          |          |          |          |          |          |         |          |          |          |         |          |          |          |         |          |          |          |          |          |          |          |         |          |          |          |         |          |          |          |          |          |         |         |                                                                                                                                                         |                                                                                                                                                                                                                                                                                                                                                                                                                                                                                                                                                                                                                                                                                                                                                                                                                                                                                                                                                                                                                                                                                                                                                                                                                                                                                                                                                                                                                                                                                                                                                                                                                                                                                                                                                                                                                                                                                                                                                                                                                                                                                                                                                                                                                                                                                               |   |         |          |          |   |         |          |          |   |         |          |          |   |         |          |          |   |         |          |          |   |         |          |          |   |          |          |          |   |         |          |          |   |         |          |          |   |          |          |          |   |         |         |         |   |          |         |         |   |         |         |         |   |          |         |         |   |          |         |         |   |         |         |         |   |         |          |         |   |          |         |         |   |         |         |         |   |          |         |         |   |          |          |          |   |          |          |          |   |          |          |          |   |          |          |          |   |          |          |          |   |          |          |          |   |          |         |          |   |          |         |          |   |          |         |          |   |          |         |          |    |          |         |         |
| C                                                                                                                                                       | 0.49298                                                                                                                                                                                                                                                                                                                                                                                                                                                                                                                                                                                                                                                                                                                                                                                                                                                                                                                                                                                                                                                                                                                                                                                                                                                                                                                                                                                                                                                                                                                                                                                                                                                                                                                                                                                                                                                                                                                                                                                                                                                                                                                                                                                                                                                                                | -0.00038 | -2.42201 |         |          |   |         |         |          |   |         |         |         |   |         |          |          |   |         |         |          |   |         |         |         |   |          |          |          |   |         |         |          |   |         |         |         |   |          |          |         |   |          |         |         |   |          |         |         |   |         |         |         |   |          |         |         |   |          |         |         |   |         |         |         |   |         |         |         |   |          |         |         |   |         |         |         |   |          |         |         |                                                                                                                                                          |                                                                                                                                                                                                                                                                                                                                                                                                                                                                                                                                                                                                                                                                                                                                                                                                                                                                                                                                                                                                                                                                                                                                                                                                                                                                                                                                                                                                                                                                                    |          |          |         |          |          |          |         |          |          |          |          |          |          |          |         |          |          |          |         |          |          |          |         |          |          |          |          |          |          |          |         |          |          |          |         |          |          |          |          |          |         |         |                                                                                                                                                         |                                                                                                                                                                                                                                                                                                                                                                                                                                                                                                                                                                                                                                                                                                                                                                                                                                                                                                                                                                                                                                                                                                                                                                                                                                                                                                                                                                                                                                                                                                                                                                                                                                                                                                                                                                                                                                                                                                                                                                                                                                                                                                                                                                                                                                                                                               |   |         |          |          |   |         |          |          |   |         |          |          |   |         |          |          |   |         |          |          |   |         |          |          |   |          |          |          |   |         |          |          |   |         |          |          |   |          |          |          |   |         |         |         |   |          |         |         |   |         |         |         |   |          |         |         |   |          |         |         |   |         |         |         |   |         |          |         |   |          |         |         |   |         |         |         |   |          |         |         |   |          |          |          |   |          |          |          |   |          |          |          |   |          |          |          |   |          |          |          |   |          |          |          |   |          |         |          |   |          |         |          |   |          |         |          |   |          |         |          |    |          |         |         |
| C                                                                                                                                                       | 2.76788                                                                                                                                                                                                                                                                                                                                                                                                                                                                                                                                                                                                                                                                                                                                                                                                                                                                                                                                                                                                                                                                                                                                                                                                                                                                                                                                                                                                                                                                                                                                                                                                                                                                                                                                                                                                                                                                                                                                                                                                                                                                                                                                                                                                                                                                                | -0.00067 | -1.65869 |         |          |   |         |         |          |   |         |         |         |   |         |          |          |   |         |         |          |   |         |         |         |   |          |          |          |   |         |         |          |   |         |         |         |   |          |          |         |   |          |         |         |   |          |         |         |   |         |         |         |   |          |         |         |   |          |         |         |   |         |         |         |   |         |         |         |   |          |         |         |   |         |         |         |   |          |         |         |                                                                                                                                                          |                                                                                                                                                                                                                                                                                                                                                                                                                                                                                                                                                                                                                                                                                                                                                                                                                                                                                                                                                                                                                                                                                                                                                                                                                                                                                                                                                                                                                                                                                    |          |          |         |          |          |          |         |          |          |          |          |          |          |          |         |          |          |          |         |          |          |          |         |          |          |          |          |          |          |          |         |          |          |          |         |          |          |          |          |          |         |         |                                                                                                                                                         |                                                                                                                                                                                                                                                                                                                                                                                                                                                                                                                                                                                                                                                                                                                                                                                                                                                                                                                                                                                                                                                                                                                                                                                                                                                                                                                                                                                                                                                                                                                                                                                                                                                                                                                                                                                                                                                                                                                                                                                                                                                                                                                                                                                                                                                                                               |   |         |          |          |   |         |          |          |   |         |          |          |   |         |          |          |   |         |          |          |   |         |          |          |   |          |          |          |   |         |          |          |   |         |          |          |   |          |          |          |   |         |         |         |   |          |         |         |   |         |         |         |   |          |         |         |   |          |         |         |   |         |         |         |   |         |          |         |   |          |         |         |   |         |         |         |   |          |         |         |   |          |          |          |   |          |          |          |   |          |          |          |   |          |          |          |   |          |          |          |   |          |          |          |   |          |         |          |   |          |         |          |   |          |         |          |   |          |         |          |    |          |         |         |
| C                                                                                                                                                       | 2.33851                                                                                                                                                                                                                                                                                                                                                                                                                                                                                                                                                                                                                                                                                                                                                                                                                                                                                                                                                                                                                                                                                                                                                                                                                                                                                                                                                                                                                                                                                                                                                                                                                                                                                                                                                                                                                                                                                                                                                                                                                                                                                                                                                                                                                                                                                | -0.00012 | -0.34238 |         |          |   |         |         |          |   |         |         |         |   |         |          |          |   |         |         |          |   |         |         |         |   |          |          |          |   |         |         |          |   |         |         |         |   |          |          |         |   |          |         |         |   |          |         |         |   |         |         |         |   |          |         |         |   |          |         |         |   |         |         |         |   |         |         |         |   |          |         |         |   |         |         |         |   |          |         |         |                                                                                                                                                          |                                                                                                                                                                                                                                                                                                                                                                                                                                                                                                                                                                                                                                                                                                                                                                                                                                                                                                                                                                                                                                                                                                                                                                                                                                                                                                                                                                                                                                                                                    |          |          |         |          |          |          |         |          |          |          |          |          |          |          |         |          |          |          |         |          |          |          |         |          |          |          |          |          |          |          |         |          |          |          |         |          |          |          |          |          |         |         |                                                                                                                                                         |                                                                                                                                                                                                                                                                                                                                                                                                                                                                                                                                                                                                                                                                                                                                                                                                                                                                                                                                                                                                                                                                                                                                                                                                                                                                                                                                                                                                                                                                                                                                                                                                                                                                                                                                                                                                                                                                                                                                                                                                                                                                                                                                                                                                                                                                                               |   |         |          |          |   |         |          |          |   |         |          |          |   |         |          |          |   |         |          |          |   |         |          |          |   |          |          |          |   |         |          |          |   |         |          |          |   |          |          |          |   |         |         |         |   |          |         |         |   |         |         |         |   |          |         |         |   |          |         |         |   |         |         |         |   |         |          |         |   |          |         |         |   |         |         |         |   |          |         |         |   |          |          |          |   |          |          |          |   |          |          |          |   |          |          |          |   |          |          |          |   |          |          |          |   |          |         |          |   |          |         |          |   |          |         |          |   |          |         |          |    |          |         |         |
| C                                                                                                                                                       | 0.07694                                                                                                                                                                                                                                                                                                                                                                                                                                                                                                                                                                                                                                                                                                                                                                                                                                                                                                                                                                                                                                                                                                                                                                                                                                                                                                                                                                                                                                                                                                                                                                                                                                                                                                                                                                                                                                                                                                                                                                                                                                                                                                                                                                                                                                                                                | 0.00020  | -1.08966 |         |          |   |         |         |          |   |         |         |         |   |         |          |          |   |         |         |          |   |         |         |         |   |          |          |          |   |         |         |          |   |         |         |         |   |          |          |         |   |          |         |         |   |          |         |         |   |         |         |         |   |          |         |         |   |          |         |         |   |         |         |         |   |         |         |         |   |          |         |         |   |         |         |         |   |          |         |         |                                                                                                                                                          |                                                                                                                                                                                                                                                                                                                                                                                                                                                                                                                                                                                                                                                                                                                                                                                                                                                                                                                                                                                                                                                                                                                                                                                                                                                                                                                                                                                                                                                                                    |          |          |         |          |          |          |         |          |          |          |          |          |          |          |         |          |          |          |         |          |          |          |         |          |          |          |          |          |          |          |         |          |          |          |         |          |          |          |          |          |         |         |                                                                                                                                                         |                                                                                                                                                                                                                                                                                                                                                                                                                                                                                                                                                                                                                                                                                                                                                                                                                                                                                                                                                                                                                                                                                                                                                                                                                                                                                                                                                                                                                                                                                                                                                                                                                                                                                                                                                                                                                                                                                                                                                                                                                                                                                                                                                                                                                                                                                               |   |         |          |          |   |         |          |          |   |         |          |          |   |         |          |          |   |         |          |          |   |         |          |          |   |          |          |          |   |         |          |          |   |         |          |          |   |          |          |          |   |         |         |         |   |          |         |         |   |         |         |         |   |          |         |         |   |          |         |         |   |         |         |         |   |         |          |         |   |          |         |         |   |         |         |         |   |          |         |         |   |          |          |          |   |          |          |          |   |          |          |          |   |          |          |          |   |          |          |          |   |          |          |          |   |          |         |          |   |          |         |          |   |          |         |          |   |          |         |          |    |          |         |         |
| H                                                                                                                                                       | 3.83016                                                                                                                                                                                                                                                                                                                                                                                                                                                                                                                                                                                                                                                                                                                                                                                                                                                                                                                                                                                                                                                                                                                                                                                                                                                                                                                                                                                                                                                                                                                                                                                                                                                                                                                                                                                                                                                                                                                                                                                                                                                                                                                                                                                                                                                                                | -0.00101 | -1.86678 |         |          |   |         |         |          |   |         |         |         |   |         |          |          |   |         |         |          |   |         |         |         |   |          |          |          |   |         |         |          |   |         |         |         |   |          |          |         |   |          |         |         |   |          |         |         |   |         |         |         |   |          |         |         |   |          |         |         |   |         |         |         |   |         |         |         |   |          |         |         |   |         |         |         |   |          |         |         |                                                                                                                                                          |                                                                                                                                                                                                                                                                                                                                                                                                                                                                                                                                                                                                                                                                                                                                                                                                                                                                                                                                                                                                                                                                                                                                                                                                                                                                                                                                                                                                                                                                                    |          |          |         |          |          |          |         |          |          |          |          |          |          |          |         |          |          |          |         |          |          |          |         |          |          |          |          |          |          |          |         |          |          |          |         |          |          |          |          |          |         |         |                                                                                                                                                         |                                                                                                                                                                                                                                                                                                                                                                                                                                                                                                                                                                                                                                                                                                                                                                                                                                                                                                                                                                                                                                                                                                                                                                                                                                                                                                                                                                                                                                                                                                                                                                                                                                                                                                                                                                                                                                                                                                                                                                                                                                                                                                                                                                                                                                                                                               |   |         |          |          |   |         |          |          |   |         |          |          |   |         |          |          |   |         |          |          |   |         |          |          |   |          |          |          |   |         |          |          |   |         |          |          |   |          |          |          |   |         |         |         |   |          |         |         |   |         |         |         |   |          |         |         |   |          |         |         |   |         |         |         |   |         |          |         |   |          |         |         |   |         |         |         |   |          |         |         |   |          |          |          |   |          |          |          |   |          |          |          |   |          |          |          |   |          |          |          |   |          |          |          |   |          |         |          |   |          |         |          |   |          |         |          |   |          |         |          |    |          |         |         |
| H                                                                                                                                                       | 3.10283                                                                                                                                                                                                                                                                                                                                                                                                                                                                                                                                                                                                                                                                                                                                                                                                                                                                                                                                                                                                                                                                                                                                                                                                                                                                                                                                                                                                                                                                                                                                                                                                                                                                                                                                                                                                                                                                                                                                                                                                                                                                                                                                                                                                                                                                                | -0.00009 | 0.41654  |         |          |   |         |         |          |   |         |         |         |   |         |          |          |   |         |         |          |   |         |         |         |   |          |          |          |   |         |         |          |   |         |         |         |   |          |          |         |   |          |         |         |   |          |         |         |   |         |         |         |   |          |         |         |   |          |         |         |   |         |         |         |   |         |         |         |   |          |         |         |   |         |         |         |   |          |         |         |                                                                                                                                                          |                                                                                                                                                                                                                                                                                                                                                                                                                                                                                                                                                                                                                                                                                                                                                                                                                                                                                                                                                                                                                                                                                                                                                                                                                                                                                                                                                                                                                                                                                    |          |          |         |          |          |          |         |          |          |          |          |          |          |          |         |          |          |          |         |          |          |          |         |          |          |          |          |          |          |          |         |          |          |          |         |          |          |          |          |          |         |         |                                                                                                                                                         |                                                                                                                                                                                                                                                                                                                                                                                                                                                                                                                                                                                                                                                                                                                                                                                                                                                                                                                                                                                                                                                                                                                                                                                                                                                                                                                                                                                                                                                                                                                                                                                                                                                                                                                                                                                                                                                                                                                                                                                                                                                                                                                                                                                                                                                                                               |   |         |          |          |   |         |          |          |   |         |          |          |   |         |          |          |   |         |          |          |   |         |          |          |   |          |          |          |   |         |          |          |   |         |          |          |   |          |          |          |   |         |         |         |   |          |         |         |   |         |         |         |   |          |         |         |   |          |         |         |   |         |         |         |   |         |          |         |   |          |         |         |   |         |         |         |   |          |         |         |   |          |          |          |   |          |          |          |   |          |          |          |   |          |          |          |   |          |          |          |   |          |          |          |   |          |         |          |   |          |         |          |   |          |         |          |   |          |         |          |    |          |         |         |
| H                                                                                                                                                       | -0.97976                                                                                                                                                                                                                                                                                                                                                                                                                                                                                                                                                                                                                                                                                                                                                                                                                                                                                                                                                                                                                                                                                                                                                                                                                                                                                                                                                                                                                                                                                                                                                                                                                                                                                                                                                                                                                                                                                                                                                                                                                                                                                                                                                                                                                                                                               | 0.00055  | -0.91184 |         |          |   |         |         |          |   |         |         |         |   |         |          |          |   |         |         |          |   |         |         |         |   |          |          |          |   |         |         |          |   |         |         |         |   |          |          |         |   |          |         |         |   |          |         |         |   |         |         |         |   |          |         |         |   |          |         |         |   |         |         |         |   |         |         |         |   |          |         |         |   |         |         |         |   |          |         |         |                                                                                                                                                          |                                                                                                                                                                                                                                                                                                                                                                                                                                                                                                                                                                                                                                                                                                                                                                                                                                                                                                                                                                                                                                                                                                                                                                                                                                                                                                                                                                                                                                                                                    |          |          |         |          |          |          |         |          |          |          |          |          |          |          |         |          |          |          |         |          |          |          |         |          |          |          |          |          |          |          |         |          |          |          |         |          |          |          |          |          |         |         |                                                                                                                                                         |                                                                                                                                                                                                                                                                                                                                                                                                                                                                                                                                                                                                                                                                                                                                                                                                                                                                                                                                                                                                                                                                                                                                                                                                                                                                                                                                                                                                                                                                                                                                                                                                                                                                                                                                                                                                                                                                                                                                                                                                                                                                                                                                                                                                                                                                                               |   |         |          |          |   |         |          |          |   |         |          |          |   |         |          |          |   |         |          |          |   |         |          |          |   |          |          |          |   |         |          |          |   |         |          |          |   |          |          |          |   |         |         |         |   |          |         |         |   |         |         |         |   |          |         |         |   |          |         |         |   |         |         |         |   |         |          |         |   |          |         |         |   |         |         |         |   |          |         |         |   |          |          |          |   |          |          |          |   |          |          |          |   |          |          |          |   |          |          |          |   |          |          |          |   |          |         |          |   |          |         |          |   |          |         |          |   |          |         |          |    |          |         |         |
| C                                                                                                                                                       | 0.53568                                                                                                                                                                                                                                                                                                                                                                                                                                                                                                                                                                                                                                                                                                                                                                                                                                                                                                                                                                                                                                                                                                                                                                                                                                                                                                                                                                                                                                                                                                                                                                                                                                                                                                                                                                                                                                                                                                                                                                                                                                                                                                                                                                                                                                                                                | 0.00061  | 1.42968  |         |          |   |         |         |          |   |         |         |         |   |         |          |          |   |         |         |          |   |         |         |         |   |          |          |          |   |         |         |          |   |         |         |         |   |          |          |         |   |          |         |         |   |          |         |         |   |         |         |         |   |          |         |         |   |          |         |         |   |         |         |         |   |         |         |         |   |          |         |         |   |         |         |         |   |          |         |         |                                                                                                                                                          |                                                                                                                                                                                                                                                                                                                                                                                                                                                                                                                                                                                                                                                                                                                                                                                                                                                                                                                                                                                                                                                                                                                                                                                                                                                                                                                                                                                                                                                                                    |          |          |         |          |          |          |         |          |          |          |          |          |          |          |         |          |          |          |         |          |          |          |         |          |          |          |          |          |          |          |         |          |          |          |         |          |          |          |          |          |         |         |                                                                                                                                                         |                                                                                                                                                                                                                                                                                                                                                                                                                                                                                                                                                                                                                                                                                                                                                                                                                                                                                                                                                                                                                                                                                                                                                                                                                                                                                                                                                                                                                                                                                                                                                                                                                                                                                                                                                                                                                                                                                                                                                                                                                                                                                                                                                                                                                                                                                               |   |         |          |          |   |         |          |          |   |         |          |          |   |         |          |          |   |         |          |          |   |         |          |          |   |          |          |          |   |         |          |          |   |         |          |          |   |          |          |          |   |         |         |         |   |          |         |         |   |         |         |         |   |          |         |         |   |          |         |         |   |         |         |         |   |         |          |         |   |          |         |         |   |         |         |         |   |          |         |         |   |          |          |          |   |          |          |          |   |          |          |          |   |          |          |          |   |          |          |          |   |          |          |          |   |          |         |          |   |          |         |          |   |          |         |          |   |          |         |          |    |          |         |         |
| C                                                                                                                                                       | -0.02935                                                                                                                                                                                                                                                                                                                                                                                                                                                                                                                                                                                                                                                                                                                                                                                                                                                                                                                                                                                                                                                                                                                                                                                                                                                                                                                                                                                                                                                                                                                                                                                                                                                                                                                                                                                                                                                                                                                                                                                                                                                                                                                                                                                                                                                                               | 0.00056  | 4.24462  |         |          |   |         |         |          |   |         |         |         |   |         |          |          |   |         |         |          |   |         |         |         |   |          |          |          |   |         |         |          |   |         |         |         |   |          |          |         |   |          |         |         |   |          |         |         |   |         |         |         |   |          |         |         |   |          |         |         |   |         |         |         |   |         |         |         |   |          |         |         |   |         |         |         |   |          |         |         |                                                                                                                                                          |                                                                                                                                                                                                                                                                                                                                                                                                                                                                                                                                                                                                                                                                                                                                                                                                                                                                                                                                                                                                                                                                                                                                                                                                                                                                                                                                                                                                                                                                                    |          |          |         |          |          |          |         |          |          |          |          |          |          |          |         |          |          |          |         |          |          |          |         |          |          |          |          |          |          |          |         |          |          |          |         |          |          |          |          |          |         |         |                                                                                                                                                         |                                                                                                                                                                                                                                                                                                                                                                                                                                                                                                                                                                                                                                                                                                                                                                                                                                                                                                                                                                                                                                                                                                                                                                                                                                                                                                                                                                                                                                                                                                                                                                                                                                                                                                                                                                                                                                                                                                                                                                                                                                                                                                                                                                                                                                                                                               |   |         |          |          |   |         |          |          |   |         |          |          |   |         |          |          |   |         |          |          |   |         |          |          |   |          |          |          |   |         |          |          |   |         |          |          |   |          |          |          |   |         |         |         |   |          |         |         |   |         |         |         |   |          |         |         |   |          |         |         |   |         |         |         |   |         |          |         |   |          |         |         |   |         |         |         |   |          |         |         |   |          |          |          |   |          |          |          |   |          |          |          |   |          |          |          |   |          |          |          |   |          |          |          |   |          |         |          |   |          |         |          |   |          |         |          |   |          |         |          |    |          |         |         |
| C                                                                                                                                                       | 1.53525                                                                                                                                                                                                                                                                                                                                                                                                                                                                                                                                                                                                                                                                                                                                                                                                                                                                                                                                                                                                                                                                                                                                                                                                                                                                                                                                                                                                                                                                                                                                                                                                                                                                                                                                                                                                                                                                                                                                                                                                                                                                                                                                                                                                                                                                                | 0.00039  | 2.42842  |         |          |   |         |         |          |   |         |         |         |   |         |          |          |   |         |         |          |   |         |         |         |   |          |          |          |   |         |         |          |   |         |         |         |   |          |          |         |   |          |         |         |   |          |         |         |   |         |         |         |   |          |         |         |   |          |         |         |   |         |         |         |   |         |         |         |   |          |         |         |   |         |         |         |   |          |         |         |                                                                                                                                                          |                                                                                                                                                                                                                                                                                                                                                                                                                                                                                                                                                                                                                                                                                                                                                                                                                                                                                                                                                                                                                                                                                                                                                                                                                                                                                                                                                                                                                                                                                    |          |          |         |          |          |          |         |          |          |          |          |          |          |          |         |          |          |          |         |          |          |          |         |          |          |          |          |          |          |          |         |          |          |          |         |          |          |          |          |          |         |         |                                                                                                                                                         |                                                                                                                                                                                                                                                                                                                                                                                                                                                                                                                                                                                                                                                                                                                                                                                                                                                                                                                                                                                                                                                                                                                                                                                                                                                                                                                                                                                                                                                                                                                                                                                                                                                                                                                                                                                                                                                                                                                                                                                                                                                                                                                                                                                                                                                                                               |   |         |          |          |   |         |          |          |   |         |          |          |   |         |          |          |   |         |          |          |   |         |          |          |   |          |          |          |   |         |          |          |   |         |          |          |   |          |          |          |   |         |         |         |   |          |         |         |   |         |         |         |   |          |         |         |   |          |         |         |   |         |         |         |   |         |          |         |   |          |         |         |   |         |         |         |   |          |         |         |   |          |          |          |   |          |          |          |   |          |          |          |   |          |          |          |   |          |          |          |   |          |          |          |   |          |         |          |   |          |         |          |   |          |         |          |   |          |         |          |    |          |         |         |
| C                                                                                                                                                       | -0.78341                                                                                                                                                                                                                                                                                                                                                                                                                                                                                                                                                                                                                                                                                                                                                                                                                                                                                                                                                                                                                                                                                                                                                                                                                                                                                                                                                                                                                                                                                                                                                                                                                                                                                                                                                                                                                                                                                                                                                                                                                                                                                                                                                                                                                                                                               | 0.00095  | 1.94277  |         |          |   |         |         |          |   |         |         |         |   |         |          |          |   |         |         |          |   |         |         |         |   |          |          |          |   |         |         |          |   |         |         |         |   |          |          |         |   |          |         |         |   |          |         |         |   |         |         |         |   |          |         |         |   |          |         |         |   |         |         |         |   |         |         |         |   |          |         |         |   |         |         |         |   |          |         |         |                                                                                                                                                          |                                                                                                                                                                                                                                                                                                                                                                                                                                                                                                                                                                                                                                                                                                                                                                                                                                                                                                                                                                                                                                                                                                                                                                                                                                                                                                                                                                                                                                                                                    |          |          |         |          |          |          |         |          |          |          |          |          |          |          |         |          |          |          |         |          |          |          |         |          |          |          |          |          |          |          |         |          |          |          |         |          |          |          |          |          |         |         |                                                                                                                                                         |                                                                                                                                                                                                                                                                                                                                                                                                                                                                                                                                                                                                                                                                                                                                                                                                                                                                                                                                                                                                                                                                                                                                                                                                                                                                                                                                                                                                                                                                                                                                                                                                                                                                                                                                                                                                                                                                                                                                                                                                                                                                                                                                                                                                                                                                                               |   |         |          |          |   |         |          |          |   |         |          |          |   |         |          |          |   |         |          |          |   |         |          |          |   |          |          |          |   |         |          |          |   |         |          |          |   |          |          |          |   |         |         |         |   |          |         |         |   |         |         |         |   |          |         |         |   |          |         |         |   |         |         |         |   |         |          |         |   |          |         |         |   |         |         |         |   |          |         |         |   |          |          |          |   |          |          |          |   |          |          |          |   |          |          |          |   |          |          |          |   |          |          |          |   |          |         |          |   |          |         |          |   |          |         |          |   |          |         |          |    |          |         |         |
| C                                                                                                                                                       | -1.05086                                                                                                                                                                                                                                                                                                                                                                                                                                                                                                                                                                                                                                                                                                                                                                                                                                                                                                                                                                                                                                                                                                                                                                                                                                                                                                                                                                                                                                                                                                                                                                                                                                                                                                                                                                                                                                                                                                                                                                                                                                                                                                                                                                                                                                                                               | 0.00088  | 3.31305  |         |          |   |         |         |          |   |         |         |         |   |         |          |          |   |         |         |          |   |         |         |         |   |          |          |          |   |         |         |          |   |         |         |         |   |          |          |         |   |          |         |         |   |          |         |         |   |         |         |         |   |          |         |         |   |          |         |         |   |         |         |         |   |         |         |         |   |          |         |         |   |         |         |         |   |          |         |         |                                                                                                                                                          |                                                                                                                                                                                                                                                                                                                                                                                                                                                                                                                                                                                                                                                                                                                                                                                                                                                                                                                                                                                                                                                                                                                                                                                                                                                                                                                                                                                                                                                                                    |          |          |         |          |          |          |         |          |          |          |          |          |          |          |         |          |          |          |         |          |          |          |         |          |          |          |          |          |          |          |         |          |          |          |         |          |          |          |          |          |         |         |                                                                                                                                                         |                                                                                                                                                                                                                                                                                                                                                                                                                                                                                                                                                                                                                                                                                                                                                                                                                                                                                                                                                                                                                                                                                                                                                                                                                                                                                                                                                                                                                                                                                                                                                                                                                                                                                                                                                                                                                                                                                                                                                                                                                                                                                                                                                                                                                                                                                               |   |         |          |          |   |         |          |          |   |         |          |          |   |         |          |          |   |         |          |          |   |         |          |          |   |          |          |          |   |         |          |          |   |         |          |          |   |          |          |          |   |         |         |         |   |          |         |         |   |         |         |         |   |          |         |         |   |          |         |         |   |         |         |         |   |         |          |         |   |          |         |         |   |         |         |         |   |          |         |         |   |          |          |          |   |          |          |          |   |          |          |          |   |          |          |          |   |          |          |          |   |          |          |          |   |          |         |          |   |          |         |          |   |          |         |          |   |          |         |          |    |          |         |         |
| C                                                                                                                                                       | 1.28134                                                                                                                                                                                                                                                                                                                                                                                                                                                                                                                                                                                                                                                                                                                                                                                                                                                                                                                                                                                                                                                                                                                                                                                                                                                                                                                                                                                                                                                                                                                                                                                                                                                                                                                                                                                                                                                                                                                                                                                                                                                                                                                                                                                                                                                                                | 0.00037  | 3.78736  |         |          |   |         |         |          |   |         |         |         |   |         |          |          |   |         |         |          |   |         |         |         |   |          |          |          |   |         |         |          |   |         |         |         |   |          |          |         |   |          |         |         |   |          |         |         |   |         |         |         |   |          |         |         |   |          |         |         |   |         |         |         |   |         |         |         |   |          |         |         |   |         |         |         |   |          |         |         |                                                                                                                                                          |                                                                                                                                                                                                                                                                                                                                                                                                                                                                                                                                                                                                                                                                                                                                                                                                                                                                                                                                                                                                                                                                                                                                                                                                                                                                                                                                                                                                                                                                                    |          |          |         |          |          |          |         |          |          |          |          |          |          |          |         |          |          |          |         |          |          |          |         |          |          |          |          |          |          |          |         |          |          |          |         |          |          |          |          |          |         |         |                                                                                                                                                         |                                                                                                                                                                                                                                                                                                                                                                                                                                                                                                                                                                                                                                                                                                                                                                                                                                                                                                                                                                                                                                                                                                                                                                                                                                                                                                                                                                                                                                                                                                                                                                                                                                                                                                                                                                                                                                                                                                                                                                                                                                                                                                                                                                                                                                                                                               |   |         |          |          |   |         |          |          |   |         |          |          |   |         |          |          |   |         |          |          |   |         |          |          |   |          |          |          |   |         |          |          |   |         |          |          |   |          |          |          |   |         |         |         |   |          |         |         |   |         |         |         |   |          |         |         |   |          |         |         |   |         |         |         |   |         |          |         |   |          |         |         |   |         |         |         |   |          |         |         |   |          |          |          |   |          |          |          |   |          |          |          |   |          |          |          |   |          |          |          |   |          |          |          |   |          |         |          |   |          |         |          |   |          |         |          |   |          |         |          |    |          |         |         |
| H                                                                                                                                                       | 2.57038                                                                                                                                                                                                                                                                                                                                                                                                                                                                                                                                                                                                                                                                                                                                                                                                                                                                                                                                                                                                                                                                                                                                                                                                                                                                                                                                                                                                                                                                                                                                                                                                                                                                                                                                                                                                                                                                                                                                                                                                                                                                                                                                                                                                                                                                                | 0.00013  | 2.13398  |         |          |   |         |         |          |   |         |         |         |   |         |          |          |   |         |         |          |   |         |         |         |   |          |          |          |   |         |         |          |   |         |         |         |   |          |          |         |   |          |         |         |   |          |         |         |   |         |         |         |   |          |         |         |   |          |         |         |   |         |         |         |   |         |         |         |   |          |         |         |   |         |         |         |   |          |         |         |                                                                                                                                                          |                                                                                                                                                                                                                                                                                                                                                                                                                                                                                                                                                                                                                                                                                                                                                                                                                                                                                                                                                                                                                                                                                                                                                                                                                                                                                                                                                                                                                                                                                    |          |          |         |          |          |          |         |          |          |          |          |          |          |          |         |          |          |          |         |          |          |          |         |          |          |          |          |          |          |          |         |          |          |          |         |          |          |          |          |          |         |         |                                                                                                                                                         |                                                                                                                                                                                                                                                                                                                                                                                                                                                                                                                                                                                                                                                                                                                                                                                                                                                                                                                                                                                                                                                                                                                                                                                                                                                                                                                                                                                                                                                                                                                                                                                                                                                                                                                                                                                                                                                                                                                                                                                                                                                                                                                                                                                                                                                                                               |   |         |          |          |   |         |          |          |   |         |          |          |   |         |          |          |   |         |          |          |   |         |          |          |   |          |          |          |   |         |          |          |   |         |          |          |   |          |          |          |   |         |         |         |   |          |         |         |   |         |         |         |   |          |         |         |   |          |         |         |   |         |         |         |   |         |          |         |   |          |         |         |   |         |         |         |   |          |         |         |   |          |          |          |   |          |          |          |   |          |          |          |   |          |          |          |   |          |          |          |   |          |          |          |   |          |         |          |   |          |         |          |   |          |         |          |   |          |         |          |    |          |         |         |
| H                                                                                                                                                       | -2.08157                                                                                                                                                                                                                                                                                                                                                                                                                                                                                                                                                                                                                                                                                                                                                                                                                                                                                                                                                                                                                                                                                                                                                                                                                                                                                                                                                                                                                                                                                                                                                                                                                                                                                                                                                                                                                                                                                                                                                                                                                                                                                                                                                                                                                                                                               | 0.00113  | 3.63757  |         |          |   |         |         |          |   |         |         |         |   |         |          |          |   |         |         |          |   |         |         |         |   |          |          |          |   |         |         |          |   |         |         |         |   |          |          |         |   |          |         |         |   |          |         |         |   |         |         |         |   |          |         |         |   |          |         |         |   |         |         |         |   |         |         |         |   |          |         |         |   |         |         |         |   |          |         |         |                                                                                                                                                          |                                                                                                                                                                                                                                                                                                                                                                                                                                                                                                                                                                                                                                                                                                                                                                                                                                                                                                                                                                                                                                                                                                                                                                                                                                                                                                                                                                                                                                                                                    |          |          |         |          |          |          |         |          |          |          |          |          |          |          |         |          |          |          |         |          |          |          |         |          |          |          |          |          |          |          |         |          |          |          |         |          |          |          |          |          |         |         |                                                                                                                                                         |                                                                                                                                                                                                                                                                                                                                                                                                                                                                                                                                                                                                                                                                                                                                                                                                                                                                                                                                                                                                                                                                                                                                                                                                                                                                                                                                                                                                                                                                                                                                                                                                                                                                                                                                                                                                                                                                                                                                                                                                                                                                                                                                                                                                                                                                                               |   |         |          |          |   |         |          |          |   |         |          |          |   |         |          |          |   |         |          |          |   |         |          |          |   |          |          |          |   |         |          |          |   |         |          |          |   |          |          |          |   |         |         |         |   |          |         |         |   |         |         |         |   |          |         |         |   |          |         |         |   |         |         |         |   |         |          |         |   |          |         |         |   |         |         |         |   |          |         |         |   |          |          |          |   |          |          |          |   |          |          |          |   |          |          |          |   |          |          |          |   |          |          |          |   |          |         |          |   |          |         |          |   |          |         |          |   |          |         |          |    |          |         |         |
| H                                                                                                                                                       | 2.11033                                                                                                                                                                                                                                                                                                                                                                                                                                                                                                                                                                                                                                                                                                                                                                                                                                                                                                                                                                                                                                                                                                                                                                                                                                                                                                                                                                                                                                                                                                                                                                                                                                                                                                                                                                                                                                                                                                                                                                                                                                                                                                                                                                                                                                                                                | 0.00018  | 4.48238  |         |          |   |         |         |          |   |         |         |         |   |         |          |          |   |         |         |          |   |         |         |         |   |          |          |          |   |         |         |          |   |         |         |         |   |          |          |         |   |          |         |         |   |          |         |         |   |         |         |         |   |          |         |         |   |          |         |         |   |         |         |         |   |         |         |         |   |          |         |         |   |         |         |         |   |          |         |         |                                                                                                                                                          |                                                                                                                                                                                                                                                                                                                                                                                                                                                                                                                                                                                                                                                                                                                                                                                                                                                                                                                                                                                                                                                                                                                                                                                                                                                                                                                                                                                                                                                                                    |          |          |         |          |          |          |         |          |          |          |          |          |          |          |         |          |          |          |         |          |          |          |         |          |          |          |          |          |          |          |         |          |          |          |         |          |          |          |          |          |         |         |                                                                                                                                                         |                                                                                                                                                                                                                                                                                                                                                                                                                                                                                                                                                                                                                                                                                                                                                                                                                                                                                                                                                                                                                                                                                                                                                                                                                                                                                                                                                                                                                                                                                                                                                                                                                                                                                                                                                                                                                                                                                                                                                                                                                                                                                                                                                                                                                                                                                               |   |         |          |          |   |         |          |          |   |         |          |          |   |         |          |          |   |         |          |          |   |         |          |          |   |          |          |          |   |         |          |          |   |         |          |          |   |          |          |          |   |         |         |         |   |          |         |         |   |         |         |         |   |          |         |         |   |          |         |         |   |         |         |         |   |         |          |         |   |          |         |         |   |         |         |         |   |          |         |         |   |          |          |          |   |          |          |          |   |          |          |          |   |          |          |          |   |          |          |          |   |          |          |          |   |          |         |          |   |          |         |          |   |          |         |          |   |          |         |          |    |          |         |         |
| H                                                                                                                                                       | -0.25787                                                                                                                                                                                                                                                                                                                                                                                                                                                                                                                                                                                                                                                                                                                                                                                                                                                                                                                                                                                                                                                                                                                                                                                                                                                                                                                                                                                                                                                                                                                                                                                                                                                                                                                                                                                                                                                                                                                                                                                                                                                                                                                                                                                                                                                                               | 0.00057  | 5.30178  |         |          |   |         |         |          |   |         |         |         |   |         |          |          |   |         |         |          |   |         |         |         |   |          |          |          |   |         |         |          |   |         |         |         |   |          |          |         |   |          |         |         |   |          |         |         |   |         |         |         |   |          |         |         |   |          |         |         |   |         |         |         |   |         |         |         |   |          |         |         |   |         |         |         |   |          |         |         |                                                                                                                                                          |                                                                                                                                                                                                                                                                                                                                                                                                                                                                                                                                                                                                                                                                                                                                                                                                                                                                                                                                                                                                                                                                                                                                                                                                                                                                                                                                                                                                                                                                                    |          |          |         |          |          |          |         |          |          |          |          |          |          |          |         |          |          |          |         |          |          |          |         |          |          |          |          |          |          |          |         |          |          |          |         |          |          |          |          |          |         |         |                                                                                                                                                         |                                                                                                                                                                                                                                                                                                                                                                                                                                                                                                                                                                                                                                                                                                                                                                                                                                                                                                                                                                                                                                                                                                                                                                                                                                                                                                                                                                                                                                                                                                                                                                                                                                                                                                                                                                                                                                                                                                                                                                                                                                                                                                                                                                                                                                                                                               |   |         |          |          |   |         |          |          |   |         |          |          |   |         |          |          |   |         |          |          |   |         |          |          |   |          |          |          |   |         |          |          |   |         |          |          |   |          |          |          |   |         |         |         |   |          |         |         |   |         |         |         |   |          |         |         |   |          |         |         |   |         |         |         |   |         |          |         |   |          |         |         |   |         |         |         |   |          |         |         |   |          |          |          |   |          |          |          |   |          |          |          |   |          |          |          |   |          |          |          |   |          |          |          |   |          |         |          |   |          |         |          |   |          |         |          |   |          |         |          |    |          |         |         |
| C                                                                                                                                                       | -0.53944                                                                                                                                                                                                                                                                                                                                                                                                                                                                                                                                                                                                                                                                                                                                                                                                                                                                                                                                                                                                                                                                                                                                                                                                                                                                                                                                                                                                                                                                                                                                                                                                                                                                                                                                                                                                                                                                                                                                                                                                                                                                                                                                                                                                                                                                               | -0.00010 | -3.53002 |         |          |   |         |         |          |   |         |         |         |   |         |          |          |   |         |         |          |   |         |         |         |   |          |          |          |   |         |         |          |   |         |         |         |   |          |          |         |   |          |         |         |   |          |         |         |   |         |         |         |   |          |         |         |   |          |         |         |   |         |         |         |   |         |         |         |   |          |         |         |   |         |         |         |   |          |         |         |                                                                                                                                                          |                                                                                                                                                                                                                                                                                                                                                                                                                                                                                                                                                                                                                                                                                                                                                                                                                                                                                                                                                                                                                                                                                                                                                                                                                                                                                                                                                                                                                                                                                    |          |          |         |          |          |          |         |          |          |          |          |          |          |          |         |          |          |          |         |          |          |          |         |          |          |          |          |          |          |          |         |          |          |          |         |          |          |          |          |          |         |         |                                                                                                                                                         |                                                                                                                                                                                                                                                                                                                                                                                                                                                                                                                                                                                                                                                                                                                                                                                                                                                                                                                                                                                                                                                                                                                                                                                                                                                                                                                                                                                                                                                                                                                                                                                                                                                                                                                                                                                                                                                                                                                                                                                                                                                                                                                                                                                                                                                                                               |   |         |          |          |   |         |          |          |   |         |          |          |   |         |          |          |   |         |          |          |   |         |          |          |   |          |          |          |   |         |          |          |   |         |          |          |   |          |          |          |   |         |         |         |   |          |         |         |   |         |         |         |   |          |         |         |   |          |         |         |   |         |         |         |   |         |          |         |   |          |         |         |   |         |         |         |   |          |         |         |   |          |          |          |   |          |          |          |   |          |          |          |   |          |          |          |   |          |          |          |   |          |          |          |   |          |         |          |   |          |         |          |   |          |         |          |   |          |         |          |    |          |         |         |
| H                                                                                                                                                       | 0.00104                                                                                                                                                                                                                                                                                                                                                                                                                                                                                                                                                                                                                                                                                                                                                                                                                                                                                                                                                                                                                                                                                                                                                                                                                                                                                                                                                                                                                                                                                                                                                                                                                                                                                                                                                                                                                                                                                                                                                                                                                                                                                                                                                                                                                                                                                | -0.00218 | -4.48085 |         |          |   |         |         |          |   |         |         |         |   |         |          |          |   |         |         |          |   |         |         |         |   |          |          |          |   |         |         |          |   |         |         |         |   |          |          |         |   |          |         |         |   |          |         |         |   |         |         |         |   |          |         |         |   |          |         |         |   |         |         |         |   |         |         |         |   |          |         |         |   |         |         |         |   |          |         |         |                                                                                                                                                          |                                                                                                                                                                                                                                                                                                                                                                                                                                                                                                                                                                                                                                                                                                                                                                                                                                                                                                                                                                                                                                                                                                                                                                                                                                                                                                                                                                                                                                                                                    |          |          |         |          |          |          |         |          |          |          |          |          |          |          |         |          |          |          |         |          |          |          |         |          |          |          |          |          |          |          |         |          |          |          |         |          |          |          |          |          |         |         |                                                                                                                                                         |                                                                                                                                                                                                                                                                                                                                                                                                                                                                                                                                                                                                                                                                                                                                                                                                                                                                                                                                                                                                                                                                                                                                                                                                                                                                                                                                                                                                                                                                                                                                                                                                                                                                                                                                                                                                                                                                                                                                                                                                                                                                                                                                                                                                                                                                                               |   |         |          |          |   |         |          |          |   |         |          |          |   |         |          |          |   |         |          |          |   |         |          |          |   |          |          |          |   |         |          |          |   |         |          |          |   |          |          |          |   |         |         |         |   |          |         |         |   |         |         |         |   |          |         |         |   |          |         |         |   |         |         |         |   |         |          |         |   |          |         |         |   |         |         |         |   |          |         |         |   |          |          |          |   |          |          |          |   |          |          |          |   |          |          |          |   |          |          |          |   |          |          |          |   |          |         |          |   |          |         |          |   |          |         |          |   |          |         |          |    |          |         |         |
| C                                                                                                                                                       | -1.41659                                                                                                                                                                                                                                                                                                                                                                                                                                                                                                                                                                                                                                                                                                                                                                                                                                                                                                                                                                                                                                                                                                                                                                                                                                                                                                                                                                                                                                                                                                                                                                                                                                                                                                                                                                                                                                                                                                                                                                                                                                                                                                                                                                                                                                                                               | -1.25810 | -3.47697 |         |          |   |         |         |          |   |         |         |         |   |         |          |          |   |         |         |          |   |         |         |         |   |          |          |          |   |         |         |          |   |         |         |         |   |          |          |         |   |          |         |         |   |          |         |         |   |         |         |         |   |          |         |         |   |          |         |         |   |         |         |         |   |         |         |         |   |          |         |         |   |         |         |         |   |          |         |         |                                                                                                                                                          |                                                                                                                                                                                                                                                                                                                                                                                                                                                                                                                                                                                                                                                                                                                                                                                                                                                                                                                                                                                                                                                                                                                                                                                                                                                                                                                                                                                                                                                                                    |          |          |         |          |          |          |         |          |          |          |          |          |          |          |         |          |          |          |         |          |          |          |         |          |          |          |          |          |          |          |         |          |          |          |         |          |          |          |          |          |         |         |                                                                                                                                                         |                                                                                                                                                                                                                                                                                                                                                                                                                                                                                                                                                                                                                                                                                                                                                                                                                                                                                                                                                                                                                                                                                                                                                                                                                                                                                                                                                                                                                                                                                                                                                                                                                                                                                                                                                                                                                                                                                                                                                                                                                                                                                                                                                                                                                                                                                               |   |         |          |          |   |         |          |          |   |         |          |          |   |         |          |          |   |         |          |          |   |         |          |          |   |          |          |          |   |         |          |          |   |         |          |          |   |          |          |          |   |         |         |         |   |          |         |         |   |         |         |         |   |          |         |         |   |          |         |         |   |         |         |         |   |         |          |         |   |          |         |         |   |         |         |         |   |          |         |         |   |          |          |          |   |          |          |          |   |          |          |          |   |          |          |          |   |          |          |          |   |          |          |          |   |          |         |          |   |          |         |          |   |          |         |          |   |          |         |          |    |          |         |         |
| H                                                                                                                                                       | -1.97724                                                                                                                                                                                                                                                                                                                                                                                                                                                                                                                                                                                                                                                                                                                                                                                                                                                                                                                                                                                                                                                                                                                                                                                                                                                                                                                                                                                                                                                                                                                                                                                                                                                                                                                                                                                                                                                                                                                                                                                                                                                                                                                                                                                                                                                                               | -1.29109 | -2.53988 |         |          |   |         |         |          |   |         |         |         |   |         |          |          |   |         |         |          |   |         |         |         |   |          |          |          |   |         |         |          |   |         |         |         |   |          |          |         |   |          |         |         |   |          |         |         |   |         |         |         |   |          |         |         |   |          |         |         |   |         |         |         |   |         |         |         |   |          |         |         |   |         |         |         |   |          |         |         |                                                                                                                                                          |                                                                                                                                                                                                                                                                                                                                                                                                                                                                                                                                                                                                                                                                                                                                                                                                                                                                                                                                                                                                                                                                                                                                                                                                                                                                                                                                                                                                                                                                                    |          |          |         |          |          |          |         |          |          |          |          |          |          |          |         |          |          |          |         |          |          |          |         |          |          |          |          |          |          |          |         |          |          |          |         |          |          |          |          |          |         |         |                                                                                                                                                         |                                                                                                                                                                                                                                                                                                                                                                                                                                                                                                                                                                                                                                                                                                                                                                                                                                                                                                                                                                                                                                                                                                                                                                                                                                                                                                                                                                                                                                                                                                                                                                                                                                                                                                                                                                                                                                                                                                                                                                                                                                                                                                                                                                                                                                                                                               |   |         |          |          |   |         |          |          |   |         |          |          |   |         |          |          |   |         |          |          |   |         |          |          |   |          |          |          |   |         |          |          |   |         |          |          |   |          |          |          |   |         |         |         |   |          |         |         |   |         |         |         |   |          |         |         |   |          |         |         |   |         |         |         |   |         |          |         |   |          |         |         |   |         |         |         |   |          |         |         |   |          |          |          |   |          |          |          |   |          |          |          |   |          |          |          |   |          |          |          |   |          |          |          |   |          |         |          |   |          |         |          |   |          |         |          |   |          |         |          |    |          |         |         |
| H                                                                                                                                                       | -0.81046                                                                                                                                                                                                                                                                                                                                                                                                                                                                                                                                                                                                                                                                                                                                                                                                                                                                                                                                                                                                                                                                                                                                                                                                                                                                                                                                                                                                                                                                                                                                                                                                                                                                                                                                                                                                                                                                                                                                                                                                                                                                                                                                                                                                                                                                               | -2.16383 | -3.54039 |         |          |   |         |         |          |   |         |         |         |   |         |          |          |   |         |         |          |   |         |         |         |   |          |          |          |   |         |         |          |   |         |         |         |   |          |          |         |   |          |         |         |   |          |         |         |   |         |         |         |   |          |         |         |   |          |         |         |   |         |         |         |   |         |         |         |   |          |         |         |   |         |         |         |   |          |         |         |                                                                                                                                                          |                                                                                                                                                                                                                                                                                                                                                                                                                                                                                                                                                                                                                                                                                                                                                                                                                                                                                                                                                                                                                                                                                                                                                                                                                                                                                                                                                                                                                                                                                    |          |          |         |          |          |          |         |          |          |          |          |          |          |          |         |          |          |          |         |          |          |          |         |          |          |          |          |          |          |          |         |          |          |          |         |          |          |          |          |          |         |         |                                                                                                                                                         |                                                                                                                                                                                                                                                                                                                                                                                                                                                                                                                                                                                                                                                                                                                                                                                                                                                                                                                                                                                                                                                                                                                                                                                                                                                                                                                                                                                                                                                                                                                                                                                                                                                                                                                                                                                                                                                                                                                                                                                                                                                                                                                                                                                                                                                                                               |   |         |          |          |   |         |          |          |   |         |          |          |   |         |          |          |   |         |          |          |   |         |          |          |   |          |          |          |   |         |          |          |   |         |          |          |   |          |          |          |   |         |         |         |   |          |         |         |   |         |         |         |   |          |         |         |   |          |         |         |   |         |         |         |   |         |          |         |   |          |         |         |   |         |         |         |   |          |         |         |   |          |          |          |   |          |          |          |   |          |          |          |   |          |          |          |   |          |          |          |   |          |          |          |   |          |         |          |   |          |         |          |   |          |         |          |   |          |         |          |    |          |         |         |
| H                                                                                                                                                       | -2.13316                                                                                                                                                                                                                                                                                                                                                                                                                                                                                                                                                                                                                                                                                                                                                                                                                                                                                                                                                                                                                                                                                                                                                                                                                                                                                                                                                                                                                                                                                                                                                                                                                                                                                                                                                                                                                                                                                                                                                                                                                                                                                                                                                                                                                                                                               | -1.25809 | -4.30173 |         |          |   |         |         |          |   |         |         |         |   |         |          |          |   |         |         |          |   |         |         |         |   |          |          |          |   |         |         |          |   |         |         |         |   |          |          |         |   |          |         |         |   |          |         |         |   |         |         |         |   |          |         |         |   |          |         |         |   |         |         |         |   |         |         |         |   |          |         |         |   |         |         |         |   |          |         |         |                                                                                                                                                          |                                                                                                                                                                                                                                                                                                                                                                                                                                                                                                                                                                                                                                                                                                                                                                                                                                                                                                                                                                                                                                                                                                                                                                                                                                                                                                                                                                                                                                                                                    |          |          |         |          |          |          |         |          |          |          |          |          |          |          |         |          |          |          |         |          |          |          |         |          |          |          |          |          |          |          |         |          |          |          |         |          |          |          |          |          |         |         |                                                                                                                                                         |                                                                                                                                                                                                                                                                                                                                                                                                                                                                                                                                                                                                                                                                                                                                                                                                                                                                                                                                                                                                                                                                                                                                                                                                                                                                                                                                                                                                                                                                                                                                                                                                                                                                                                                                                                                                                                                                                                                                                                                                                                                                                                                                                                                                                                                                                               |   |         |          |          |   |         |          |          |   |         |          |          |   |         |          |          |   |         |          |          |   |         |          |          |   |          |          |          |   |         |          |          |   |         |          |          |   |          |          |          |   |         |         |         |   |          |         |         |   |         |         |         |   |          |         |         |   |          |         |         |   |         |         |         |   |         |          |         |   |          |         |         |   |         |         |         |   |          |         |         |   |          |          |          |   |          |          |          |   |          |          |          |   |          |          |          |   |          |          |          |   |          |          |          |   |          |         |          |   |          |         |          |   |          |         |          |   |          |         |          |    |          |         |         |
| C                                                                                                                                                       | -1.41209                                                                                                                                                                                                                                                                                                                                                                                                                                                                                                                                                                                                                                                                                                                                                                                                                                                                                                                                                                                                                                                                                                                                                                                                                                                                                                                                                                                                                                                                                                                                                                                                                                                                                                                                                                                                                                                                                                                                                                                                                                                                                                                                                                                                                                                                               | 1.26118  | -3.47991 |         |          |   |         |         |          |   |         |         |         |   |         |          |          |   |         |         |          |   |         |         |         |   |          |          |          |   |         |         |          |   |         |         |         |   |          |          |         |   |          |         |         |   |          |         |         |   |         |         |         |   |          |         |         |   |          |         |         |   |         |         |         |   |         |         |         |   |          |         |         |   |         |         |         |   |          |         |         |                                                                                                                                                          |                                                                                                                                                                                                                                                                                                                                                                                                                                                                                                                                                                                                                                                                                                                                                                                                                                                                                                                                                                                                                                                                                                                                                                                                                                                                                                                                                                                                                                                                                    |          |          |         |          |          |          |         |          |          |          |          |          |          |          |         |          |          |          |         |          |          |          |         |          |          |          |          |          |          |          |         |          |          |          |         |          |          |          |          |          |         |         |                                                                                                                                                         |                                                                                                                                                                                                                                                                                                                                                                                                                                                                                                                                                                                                                                                                                                                                                                                                                                                                                                                                                                                                                                                                                                                                                                                                                                                                                                                                                                                                                                                                                                                                                                                                                                                                                                                                                                                                                                                                                                                                                                                                                                                                                                                                                                                                                                                                                               |   |         |          |          |   |         |          |          |   |         |          |          |   |         |          |          |   |         |          |          |   |         |          |          |   |          |          |          |   |         |          |          |   |         |          |          |   |          |          |          |   |         |         |         |   |          |         |         |   |         |         |         |   |          |         |         |   |          |         |         |   |         |         |         |   |         |          |         |   |          |         |         |   |         |         |         |   |          |         |         |   |          |          |          |   |          |          |          |   |          |          |          |   |          |          |          |   |          |          |          |   |          |          |          |   |          |         |          |   |          |         |          |   |          |         |          |   |          |         |          |    |          |         |         |
| H                                                                                                                                                       | -1.97208                                                                                                                                                                                                                                                                                                                                                                                                                                                                                                                                                                                                                                                                                                                                                                                                                                                                                                                                                                                                                                                                                                                                                                                                                                                                                                                                                                                                                                                                                                                                                                                                                                                                                                                                                                                                                                                                                                                                                                                                                                                                                                                                                                                                                                                                               | 1.29862  | -2.54258 |         |          |   |         |         |          |   |         |         |         |   |         |          |          |   |         |         |          |   |         |         |         |   |          |          |          |   |         |         |          |   |         |         |         |   |          |          |         |   |          |         |         |   |          |         |         |   |         |         |         |   |          |         |         |   |          |         |         |   |         |         |         |   |         |         |         |   |          |         |         |   |         |         |         |   |          |         |         |                                                                                                                                                          |                                                                                                                                                                                                                                                                                                                                                                                                                                                                                                                                                                                                                                                                                                                                                                                                                                                                                                                                                                                                                                                                                                                                                                                                                                                                                                                                                                                                                                                                                    |          |          |         |          |          |          |         |          |          |          |          |          |          |          |         |          |          |          |         |          |          |          |         |          |          |          |          |          |          |          |         |          |          |          |         |          |          |          |          |          |         |         |                                                                                                                                                         |                                                                                                                                                                                                                                                                                                                                                                                                                                                                                                                                                                                                                                                                                                                                                                                                                                                                                                                                                                                                                                                                                                                                                                                                                                                                                                                                                                                                                                                                                                                                                                                                                                                                                                                                                                                                                                                                                                                                                                                                                                                                                                                                                                                                                                                                                               |   |         |          |          |   |         |          |          |   |         |          |          |   |         |          |          |   |         |          |          |   |         |          |          |   |          |          |          |   |         |          |          |   |         |          |          |   |          |          |          |   |         |         |         |   |          |         |         |   |         |         |         |   |          |         |         |   |          |         |         |   |         |         |         |   |         |          |         |   |          |         |         |   |         |         |         |   |          |         |         |   |          |          |          |   |          |          |          |   |          |          |          |   |          |          |          |   |          |          |          |   |          |          |          |   |          |         |          |   |          |         |          |   |          |         |          |   |          |         |          |    |          |         |         |
| H                                                                                                                                                       | -2.12908                                                                                                                                                                                                                                                                                                                                                                                                                                                                                                                                                                                                                                                                                                                                                                                                                                                                                                                                                                                                                                                                                                                                                                                                                                                                                                                                                                                                                                                                                                                                                                                                                                                                                                                                                                                                                                                                                                                                                                                                                                                                                                                                                                                                                                                                               | 1.26158  | -4.30430 |         |          |   |         |         |          |   |         |         |         |   |         |          |          |   |         |         |          |   |         |         |         |   |          |          |          |   |         |         |          |   |         |         |         |   |          |          |         |   |          |         |         |   |          |         |         |   |         |         |         |   |          |         |         |   |          |         |         |   |         |         |         |   |         |         |         |   |          |         |         |   |         |         |         |   |          |         |         |                                                                                                                                                          |                                                                                                                                                                                                                                                                                                                                                                                                                                                                                                                                                                                                                                                                                                                                                                                                                                                                                                                                                                                                                                                                                                                                                                                                                                                                                                                                                                                                                                                                                    |          |          |         |          |          |          |         |          |          |          |          |          |          |          |         |          |          |          |         |          |          |          |         |          |          |          |          |          |          |          |         |          |          |          |         |          |          |          |          |          |         |         |                                                                                                                                                         |                                                                                                                                                                                                                                                                                                                                                                                                                                                                                                                                                                                                                                                                                                                                                                                                                                                                                                                                                                                                                                                                                                                                                                                                                                                                                                                                                                                                                                                                                                                                                                                                                                                                                                                                                                                                                                                                                                                                                                                                                                                                                                                                                                                                                                                                                               |   |         |          |          |   |         |          |          |   |         |          |          |   |         |          |          |   |         |          |          |   |         |          |          |   |          |          |          |   |         |          |          |   |         |          |          |   |          |          |          |   |         |         |         |   |          |         |         |   |         |         |         |   |          |         |         |   |          |         |         |   |         |         |         |   |         |          |         |   |          |         |         |   |         |         |         |   |          |         |         |   |          |          |          |   |          |          |          |   |          |          |          |   |          |          |          |   |          |          |          |   |          |          |          |   |          |         |          |   |          |         |          |   |          |         |          |   |          |         |          |    |          |         |         |
| H                                                                                                                                                       | -0.80273                                                                                                                                                                                                                                                                                                                                                                                                                                                                                                                                                                                                                                                                                                                                                                                                                                                                                                                                                                                                                                                                                                                                                                                                                                                                                                                                                                                                                                                                                                                                                                                                                                                                                                                                                                                                                                                                                                                                                                                                                                                                                                                                                                                                                                                                               | 2.16455  | -3.54602 |         |          |   |         |         |          |   |         |         |         |   |         |          |          |   |         |         |          |   |         |         |         |   |          |          |          |   |         |         |          |   |         |         |         |   |          |          |         |   |          |         |         |   |          |         |         |   |         |         |         |   |          |         |         |   |          |         |         |   |         |         |         |   |         |         |         |   |          |         |         |   |         |         |         |   |          |         |         |                                                                                                                                                          |                                                                                                                                                                                                                                                                                                                                                                                                                                                                                                                                                                                                                                                                                                                                                                                                                                                                                                                                                                                                                                                                                                                                                                                                                                                                                                                                                                                                                                                                                    |          |          |         |          |          |          |         |          |          |          |          |          |          |          |         |          |          |          |         |          |          |          |         |          |          |          |          |          |          |          |         |          |          |          |         |          |          |          |          |          |         |         |                                                                                                                                                         |                                                                                                                                                                                                                                                                                                                                                                                                                                                                                                                                                                                                                                                                                                                                                                                                                                                                                                                                                                                                                                                                                                                                                                                                                                                                                                                                                                                                                                                                                                                                                                                                                                                                                                                                                                                                                                                                                                                                                                                                                                                                                                                                                                                                                                                                                               |   |         |          |          |   |         |          |          |   |         |          |          |   |         |          |          |   |         |          |          |   |         |          |          |   |          |          |          |   |         |          |          |   |         |          |          |   |          |          |          |   |         |         |         |   |          |         |         |   |         |         |         |   |          |         |         |   |          |         |         |   |         |         |         |   |         |          |         |   |          |         |         |   |         |         |         |   |          |         |         |   |          |          |          |   |          |          |          |   |          |          |          |   |          |          |          |   |          |          |          |   |          |          |          |   |          |         |          |   |          |         |          |   |          |         |          |   |          |         |          |    |          |         |         |
| Cl                                                                                                                                                      | -2.26027                                                                                                                                                                                                                                                                                                                                                                                                                                                                                                                                                                                                                                                                                                                                                                                                                                                                                                                                                                                                                                                                                                                                                                                                                                                                                                                                                                                                                                                                                                                                                                                                                                                                                                                                                                                                                                                                                                                                                                                                                                                                                                                                                                                                                                                                               | 0.00152  | 0.98006  |         |          |   |         |         |          |   |         |         |         |   |         |          |          |   |         |         |          |   |         |         |         |   |          |          |          |   |         |         |          |   |         |         |         |   |          |          |         |   |          |         |         |   |          |         |         |   |         |         |         |   |          |         |         |   |          |         |         |   |         |         |         |   |         |         |         |   |          |         |         |   |         |         |         |   |          |         |         |                                                                                                                                                          |                                                                                                                                                                                                                                                                                                                                                                                                                                                                                                                                                                                                                                                                                                                                                                                                                                                                                                                                                                                                                                                                                                                                                                                                                                                                                                                                                                                                                                                                                    |          |          |         |          |          |          |         |          |          |          |          |          |          |          |         |          |          |          |         |          |          |          |         |          |          |          |          |          |          |          |         |          |          |          |         |          |          |          |          |          |         |         |                                                                                                                                                         |                                                                                                                                                                                                                                                                                                                                                                                                                                                                                                                                                                                                                                                                                                                                                                                                                                                                                                                                                                                                                                                                                                                                                                                                                                                                                                                                                                                                                                                                                                                                                                                                                                                                                                                                                                                                                                                                                                                                                                                                                                                                                                                                                                                                                                                                                               |   |         |          |          |   |         |          |          |   |         |          |          |   |         |          |          |   |         |          |          |   |         |          |          |   |          |          |          |   |         |          |          |   |         |          |          |   |          |          |          |   |         |         |         |   |          |         |         |   |         |         |         |   |          |         |         |   |          |         |         |   |         |         |         |   |         |          |         |   |          |         |         |   |         |         |         |   |          |         |         |   |          |          |          |   |          |          |          |   |          |          |          |   |          |          |          |   |          |          |          |   |          |          |          |   |          |         |          |   |          |         |          |   |          |         |          |   |          |         |          |    |          |         |         |
|  <p><b>1f</b><br/>-3154.558247<br/>-3155.890169<br/>-3155.043911</p>  | <table border="1"> <tbody> <tr><td>H</td><td>1.54166</td><td>0.25908</td><td>-3.04118</td></tr> <tr><td>C</td><td>1.18916</td><td>0.39225</td><td>-2.02538</td></tr> <tr><td>C</td><td>0.26935</td><td>0.74118</td><td>0.58525</td></tr> <tr><td>C</td><td>0.30867</td><td>-0.54164</td><td>-1.48196</td></tr> <tr><td>C</td><td>1.61436</td><td>1.48621</td><td>-1.27756</td></tr> <tr><td>C</td><td>1.16041</td><td>1.66063</td><td>0.02317</td></tr> <tr><td>C</td><td>-0.13961</td><td>-0.35255</td><td>-0.17592</td></tr> <tr><td>H</td><td>2.29632</td><td>2.20620</td><td>-1.71144</td></tr> <tr><td>H</td><td>1.48055</td><td>2.51519</td><td>0.60477</td></tr> <tr><td>H</td><td>-0.81909</td><td>-1.07172</td><td>0.26006</td></tr> <tr><td>C</td><td>-0.18185</td><td>0.91515</td><td>1.98668</td></tr> <tr><td>C</td><td>-0.88187</td><td>1.23943</td><td>4.70012</td></tr> <tr><td>C</td><td>0.79038</td><td>1.07956</td><td>2.98397</td></tr> <tr><td>C</td><td>-1.52077</td><td>0.93383</td><td>2.39893</td></tr> <tr><td>C</td><td>-1.87122</td><td>1.09051</td><td>3.73650</td></tr> <tr><td>C</td><td>0.45584</td><td>1.23914</td><td>4.32068</td></tr> <tr><td>H</td><td>1.82992</td><td>1.06335</td><td>2.68438</td></tr> <tr><td>H</td><td>-2.91437</td><td>1.10691</td><td>4.01801</td></tr> <tr><td>H</td><td>1.23541</td><td>1.35603</td><td>5.06170</td></tr> <tr><td>H</td><td>-1.16095</td><td>1.35972</td><td>5.73851</td></tr> <tr><td>C</td><td>-0.16438</td><td>-1.73271</td><td>-2.28725</td></tr> <tr><td>H</td><td>0.32031</td><td>-1.68041</td><td>-3.26618</td></tr> <tr><td>C</td><td>0.24071</td><td>-3.05618</td><td>-1.62540</td></tr> <tr><td>H</td><td>-0.23059</td><td>-3.15105</td><td>-0.64432</td></tr> <tr><td>H</td><td>1.32227</td><td>-3.11368</td><td>-1.48867</td></tr> <tr><td>H</td><td>-0.07995</td><td>-3.90219</td><td>-2.23784</td></tr> <tr><td>C</td><td>-1.68323</td><td>-1.68395</td><td>-2.50182</td></tr> <tr><td>H</td><td>-2.20389</td><td>-1.72456</td><td>-1.54216</td></tr> <tr><td>H</td><td>-2.01134</td><td>-2.53416</td><td>-3.10459</td></tr> <tr><td>H</td><td>-1.97935</td><td>-0.76219</td><td>-3.00594</td></tr> <tr><td>Br</td><td>-2.96845</td><td>0.81870</td><td>1.14114</td></tr> </tbody> </table> | H        | 1.54166  | 0.25908 | -3.04118 | C | 1.18916 | 0.39225 | -2.02538 | C | 0.26935 | 0.74118 | 0.58525 | C | 0.30867 | -0.54164 | -1.48196 | C | 1.61436 | 1.48621 | -1.27756 | C | 1.16041 | 1.66063 | 0.02317 | C | -0.13961 | -0.35255 | -0.17592 | H | 2.29632 | 2.20620 | -1.71144 | H | 1.48055 | 2.51519 | 0.60477 | H | -0.81909 | -1.07172 | 0.26006 | C | -0.18185 | 0.91515 | 1.98668 | C | -0.88187 | 1.23943 | 4.70012 | C | 0.79038 | 1.07956 | 2.98397 | C | -1.52077 | 0.93383 | 2.39893 | C | -1.87122 | 1.09051 | 3.73650 | C | 0.45584 | 1.23914 | 4.32068 | H | 1.82992 | 1.06335 | 2.68438 | H | -2.91437 | 1.10691 | 4.01801 | H | 1.23541 | 1.35603 | 5.06170 | H | -1.16095 | 1.35972 | 5.73851 | C                                                                                                                                                        | -0.16438                                                                                                                                                                                                                                                                                                                                                                                                                                                                                                                                                                                                                                                                                                                                                                                                                                                                                                                                                                                                                                                                                                                                                                                                                                                                                                                                                                                                                                                                           | -1.73271 | -2.28725 | H       | 0.32031  | -1.68041 | -3.26618 | C       | 0.24071  | -3.05618 | -1.62540 | H        | -0.23059 | -3.15105 | -0.64432 | H       | 1.32227  | -3.11368 | -1.48867 | H       | -0.07995 | -3.90219 | -2.23784 | C       | -1.68323 | -1.68395 | -2.50182 | H        | -2.20389 | -1.72456 | -1.54216 | H       | -2.01134 | -2.53416 | -3.10459 | H       | -1.97935 | -0.76219 | -3.00594 | Br       | -2.96845 | 0.81870 | 1.14114 |  <p><b>1f</b><br/>-3154.545183<br/>-3155.876934<br/>-3155.032168</p> | <table border="1"> <tbody> <tr><td>H</td><td>2.13020</td><td>-0.00327</td><td>-4.16592</td></tr> <tr><td>C</td><td>1.91486</td><td>-0.00247</td><td>-3.10430</td></tr> <tr><td>C</td><td>1.35324</td><td>-0.00050</td><td>-0.32101</td></tr> <tr><td>C</td><td>0.59911</td><td>-0.00166</td><td>-2.66282</td></tr> <tr><td>C</td><td>2.94707</td><td>-0.00223</td><td>-2.17184</td></tr> <tr><td>C</td><td>2.67556</td><td>-0.00123</td><td>-0.81413</td></tr> <tr><td>C</td><td>0.34429</td><td>-0.00071</td><td>-1.29063</td></tr> <tr><td>H</td><td>3.97771</td><td>-0.00282</td><td>-2.50282</td></tr> <tr><td>H</td><td>3.52504</td><td>-0.00106</td><td>-0.15210</td></tr> <tr><td>H</td><td>-0.68469</td><td>-0.00008</td><td>-0.99204</td></tr> <tr><td>C</td><td>1.09058</td><td>0.00030</td><td>1.15872</td></tr> <tr><td>C</td><td>0.88549</td><td>0.00126</td><td>4.02413</td></tr> <tr><td>C</td><td>2.20705</td><td>0.00016</td><td>2.02635</td></tr> <tr><td>C</td><td>-0.15343</td><td>0.00112</td><td>1.83447</td></tr> <tr><td>C</td><td>-0.24536</td><td>0.00151</td><td>3.22792</td></tr> <tr><td>C</td><td>2.12751</td><td>0.00065</td><td>3.40599</td></tr> <tr><td>H</td><td>3.19694</td><td>-0.00029</td><td>1.60462</td></tr> <tr><td>H</td><td>-1.22232</td><td>0.00193</td><td>3.68875</td></tr> <tr><td>H</td><td>3.03800</td><td>0.00056</td><td>3.99029</td></tr> <tr><td>H</td><td>0.79018</td><td>0.00152</td><td>5.10155</td></tr> <tr><td>C</td><td>-0.55867</td><td>-0.00094</td><td>-3.63870</td></tr> <tr><td>H</td><td>-0.13694</td><td>-0.00463</td><td>-4.64783</td></tr> <tr><td>C</td><td>-1.42519</td><td>-1.25717</td><td>-3.47785</td></tr> <tr><td>H</td><td>-1.86910</td><td>-1.28690</td><td>-2.48001</td></tr> <tr><td>H</td><td>-0.83287</td><td>-2.16434</td><td>-3.61176</td></tr> <tr><td>H</td><td>-2.23575</td><td>-1.25726</td><td>-4.21048</td></tr> <tr><td>C</td><td>-1.41730</td><td>1.26150</td><td>-3.48377</td></tr> <tr><td>H</td><td>-1.86023</td><td>1.29886</td><td>-2.48574</td></tr> <tr><td>H</td><td>-2.22831</td><td>1.26303</td><td>-4.21591</td></tr> <tr><td>H</td><td>-0.81937</td><td>2.16424</td><td>-3.62254</td></tr> <tr><td>Br</td><td>-1.91588</td><td>0.00182</td><td>1.03173</td></tr> </tbody> </table> | H | 2.13020 | -0.00327 | -4.16592 | C | 1.91486 | -0.00247 | -3.10430 | C | 1.35324 | -0.00050 | -0.32101 | C | 0.59911 | -0.00166 | -2.66282 | C | 2.94707 | -0.00223 | -2.17184 | C | 2.67556 | -0.00123 | -0.81413 | C | 0.34429  | -0.00071 | -1.29063 | H | 3.97771 | -0.00282 | -2.50282 | H | 3.52504 | -0.00106 | -0.15210 | H | -0.68469 | -0.00008 | -0.99204 | C | 1.09058 | 0.00030 | 1.15872 | C | 0.88549  | 0.00126 | 4.02413 | C | 2.20705 | 0.00016 | 2.02635 | C | -0.15343 | 0.00112 | 1.83447 | C | -0.24536 | 0.00151 | 3.22792 | C | 2.12751 | 0.00065 | 3.40599 | H | 3.19694 | -0.00029 | 1.60462 | H | -1.22232 | 0.00193 | 3.68875 | H | 3.03800 | 0.00056 | 3.99029 | H | 0.79018  | 0.00152 | 5.10155 | C | -0.55867 | -0.00094 | -3.63870 | H | -0.13694 | -0.00463 | -4.64783 | C | -1.42519 | -1.25717 | -3.47785 | H | -1.86910 | -1.28690 | -2.48001 | H | -0.83287 | -2.16434 | -3.61176 | H | -2.23575 | -1.25726 | -4.21048 | C | -1.41730 | 1.26150 | -3.48377 | H | -1.86023 | 1.29886 | -2.48574 | H | -2.22831 | 1.26303 | -4.21591 | H | -0.81937 | 2.16424 | -3.62254 | Br | -1.91588 | 0.00182 | 1.03173 |
| H                                                                                                                                                       | 1.54166                                                                                                                                                                                                                                                                                                                                                                                                                                                                                                                                                                                                                                                                                                                                                                                                                                                                                                                                                                                                                                                                                                                                                                                                                                                                                                                                                                                                                                                                                                                                                                                                                                                                                                                                                                                                                                                                                                                                                                                                                                                                                                                                                                                                                                                                                | 0.25908  | -3.04118 |         |          |   |         |         |          |   |         |         |         |   |         |          |          |   |         |         |          |   |         |         |         |   |          |          |          |   |         |         |          |   |         |         |         |   |          |          |         |   |          |         |         |   |          |         |         |   |         |         |         |   |          |         |         |   |          |         |         |   |         |         |         |   |         |         |         |   |          |         |         |   |         |         |         |   |          |         |         |                                                                                                                                                          |                                                                                                                                                                                                                                                                                                                                                                                                                                                                                                                                                                                                                                                                                                                                                                                                                                                                                                                                                                                                                                                                                                                                                                                                                                                                                                                                                                                                                                                                                    |          |          |         |          |          |          |         |          |          |          |          |          |          |          |         |          |          |          |         |          |          |          |         |          |          |          |          |          |          |          |         |          |          |          |         |          |          |          |          |          |         |         |                                                                                                                                                         |                                                                                                                                                                                                                                                                                                                                                                                                                                                                                                                                                                                                                                                                                                                                                                                                                                                                                                                                                                                                                                                                                                                                                                                                                                                                                                                                                                                                                                                                                                                                                                                                                                                                                                                                                                                                                                                                                                                                                                                                                                                                                                                                                                                                                                                                                               |   |         |          |          |   |         |          |          |   |         |          |          |   |         |          |          |   |         |          |          |   |         |          |          |   |          |          |          |   |         |          |          |   |         |          |          |   |          |          |          |   |         |         |         |   |          |         |         |   |         |         |         |   |          |         |         |   |          |         |         |   |         |         |         |   |         |          |         |   |          |         |         |   |         |         |         |   |          |         |         |   |          |          |          |   |          |          |          |   |          |          |          |   |          |          |          |   |          |          |          |   |          |          |          |   |          |         |          |   |          |         |          |   |          |         |          |   |          |         |          |    |          |         |         |
| C                                                                                                                                                       | 1.18916                                                                                                                                                                                                                                                                                                                                                                                                                                                                                                                                                                                                                                                                                                                                                                                                                                                                                                                                                                                                                                                                                                                                                                                                                                                                                                                                                                                                                                                                                                                                                                                                                                                                                                                                                                                                                                                                                                                                                                                                                                                                                                                                                                                                                                                                                | 0.39225  | -2.02538 |         |          |   |         |         |          |   |         |         |         |   |         |          |          |   |         |         |          |   |         |         |         |   |          |          |          |   |         |         |          |   |         |         |         |   |          |          |         |   |          |         |         |   |          |         |         |   |         |         |         |   |          |         |         |   |          |         |         |   |         |         |         |   |         |         |         |   |          |         |         |   |         |         |         |   |          |         |         |                                                                                                                                                          |                                                                                                                                                                                                                                                                                                                                                                                                                                                                                                                                                                                                                                                                                                                                                                                                                                                                                                                                                                                                                                                                                                                                                                                                                                                                                                                                                                                                                                                                                    |          |          |         |          |          |          |         |          |          |          |          |          |          |          |         |          |          |          |         |          |          |          |         |          |          |          |          |          |          |          |         |          |          |          |         |          |          |          |          |          |         |         |                                                                                                                                                         |                                                                                                                                                                                                                                                                                                                                                                                                                                                                                                                                                                                                                                                                                                                                                                                                                                                                                                                                                                                                                                                                                                                                                                                                                                                                                                                                                                                                                                                                                                                                                                                                                                                                                                                                                                                                                                                                                                                                                                                                                                                                                                                                                                                                                                                                                               |   |         |          |          |   |         |          |          |   |         |          |          |   |         |          |          |   |         |          |          |   |         |          |          |   |          |          |          |   |         |          |          |   |         |          |          |   |          |          |          |   |         |         |         |   |          |         |         |   |         |         |         |   |          |         |         |   |          |         |         |   |         |         |         |   |         |          |         |   |          |         |         |   |         |         |         |   |          |         |         |   |          |          |          |   |          |          |          |   |          |          |          |   |          |          |          |   |          |          |          |   |          |          |          |   |          |         |          |   |          |         |          |   |          |         |          |   |          |         |          |    |          |         |         |
| C                                                                                                                                                       | 0.26935                                                                                                                                                                                                                                                                                                                                                                                                                                                                                                                                                                                                                                                                                                                                                                                                                                                                                                                                                                                                                                                                                                                                                                                                                                                                                                                                                                                                                                                                                                                                                                                                                                                                                                                                                                                                                                                                                                                                                                                                                                                                                                                                                                                                                                                                                | 0.74118  | 0.58525  |         |          |   |         |         |          |   |         |         |         |   |         |          |          |   |         |         |          |   |         |         |         |   |          |          |          |   |         |         |          |   |         |         |         |   |          |          |         |   |          |         |         |   |          |         |         |   |         |         |         |   |          |         |         |   |          |         |         |   |         |         |         |   |         |         |         |   |          |         |         |   |         |         |         |   |          |         |         |                                                                                                                                                          |                                                                                                                                                                                                                                                                                                                                                                                                                                                                                                                                                                                                                                                                                                                                                                                                                                                                                                                                                                                                                                                                                                                                                                                                                                                                                                                                                                                                                                                                                    |          |          |         |          |          |          |         |          |          |          |          |          |          |          |         |          |          |          |         |          |          |          |         |          |          |          |          |          |          |          |         |          |          |          |         |          |          |          |          |          |         |         |                                                                                                                                                         |                                                                                                                                                                                                                                                                                                                                                                                                                                                                                                                                                                                                                                                                                                                                                                                                                                                                                                                                                                                                                                                                                                                                                                                                                                                                                                                                                                                                                                                                                                                                                                                                                                                                                                                                                                                                                                                                                                                                                                                                                                                                                                                                                                                                                                                                                               |   |         |          |          |   |         |          |          |   |         |          |          |   |         |          |          |   |         |          |          |   |         |          |          |   |          |          |          |   |         |          |          |   |         |          |          |   |          |          |          |   |         |         |         |   |          |         |         |   |         |         |         |   |          |         |         |   |          |         |         |   |         |         |         |   |         |          |         |   |          |         |         |   |         |         |         |   |          |         |         |   |          |          |          |   |          |          |          |   |          |          |          |   |          |          |          |   |          |          |          |   |          |          |          |   |          |         |          |   |          |         |          |   |          |         |          |   |          |         |          |    |          |         |         |
| C                                                                                                                                                       | 0.30867                                                                                                                                                                                                                                                                                                                                                                                                                                                                                                                                                                                                                                                                                                                                                                                                                                                                                                                                                                                                                                                                                                                                                                                                                                                                                                                                                                                                                                                                                                                                                                                                                                                                                                                                                                                                                                                                                                                                                                                                                                                                                                                                                                                                                                                                                | -0.54164 | -1.48196 |         |          |   |         |         |          |   |         |         |         |   |         |          |          |   |         |         |          |   |         |         |         |   |          |          |          |   |         |         |          |   |         |         |         |   |          |          |         |   |          |         |         |   |          |         |         |   |         |         |         |   |          |         |         |   |          |         |         |   |         |         |         |   |         |         |         |   |          |         |         |   |         |         |         |   |          |         |         |                                                                                                                                                          |                                                                                                                                                                                                                                                                                                                                                                                                                                                                                                                                                                                                                                                                                                                                                                                                                                                                                                                                                                                                                                                                                                                                                                                                                                                                                                                                                                                                                                                                                    |          |          |         |          |          |          |         |          |          |          |          |          |          |          |         |          |          |          |         |          |          |          |         |          |          |          |          |          |          |          |         |          |          |          |         |          |          |          |          |          |         |         |                                                                                                                                                         |                                                                                                                                                                                                                                                                                                                                                                                                                                                                                                                                                                                                                                                                                                                                                                                                                                                                                                                                                                                                                                                                                                                                                                                                                                                                                                                                                                                                                                                                                                                                                                                                                                                                                                                                                                                                                                                                                                                                                                                                                                                                                                                                                                                                                                                                                               |   |         |          |          |   |         |          |          |   |         |          |          |   |         |          |          |   |         |          |          |   |         |          |          |   |          |          |          |   |         |          |          |   |         |          |          |   |          |          |          |   |         |         |         |   |          |         |         |   |         |         |         |   |          |         |         |   |          |         |         |   |         |         |         |   |         |          |         |   |          |         |         |   |         |         |         |   |          |         |         |   |          |          |          |   |          |          |          |   |          |          |          |   |          |          |          |   |          |          |          |   |          |          |          |   |          |         |          |   |          |         |          |   |          |         |          |   |          |         |          |    |          |         |         |
| C                                                                                                                                                       | 1.61436                                                                                                                                                                                                                                                                                                                                                                                                                                                                                                                                                                                                                                                                                                                                                                                                                                                                                                                                                                                                                                                                                                                                                                                                                                                                                                                                                                                                                                                                                                                                                                                                                                                                                                                                                                                                                                                                                                                                                                                                                                                                                                                                                                                                                                                                                | 1.48621  | -1.27756 |         |          |   |         |         |          |   |         |         |         |   |         |          |          |   |         |         |          |   |         |         |         |   |          |          |          |   |         |         |          |   |         |         |         |   |          |          |         |   |          |         |         |   |          |         |         |   |         |         |         |   |          |         |         |   |          |         |         |   |         |         |         |   |         |         |         |   |          |         |         |   |         |         |         |   |          |         |         |                                                                                                                                                          |                                                                                                                                                                                                                                                                                                                                                                                                                                                                                                                                                                                                                                                                                                                                                                                                                                                                                                                                                                                                                                                                                                                                                                                                                                                                                                                                                                                                                                                                                    |          |          |         |          |          |          |         |          |          |          |          |          |          |          |         |          |          |          |         |          |          |          |         |          |          |          |          |          |          |          |         |          |          |          |         |          |          |          |          |          |         |         |                                                                                                                                                         |                                                                                                                                                                                                                                                                                                                                                                                                                                                                                                                                                                                                                                                                                                                                                                                                                                                                                                                                                                                                                                                                                                                                                                                                                                                                                                                                                                                                                                                                                                                                                                                                                                                                                                                                                                                                                                                                                                                                                                                                                                                                                                                                                                                                                                                                                               |   |         |          |          |   |         |          |          |   |         |          |          |   |         |          |          |   |         |          |          |   |         |          |          |   |          |          |          |   |         |          |          |   |         |          |          |   |          |          |          |   |         |         |         |   |          |         |         |   |         |         |         |   |          |         |         |   |          |         |         |   |         |         |         |   |         |          |         |   |          |         |         |   |         |         |         |   |          |         |         |   |          |          |          |   |          |          |          |   |          |          |          |   |          |          |          |   |          |          |          |   |          |          |          |   |          |         |          |   |          |         |          |   |          |         |          |   |          |         |          |    |          |         |         |
| C                                                                                                                                                       | 1.16041                                                                                                                                                                                                                                                                                                                                                                                                                                                                                                                                                                                                                                                                                                                                                                                                                                                                                                                                                                                                                                                                                                                                                                                                                                                                                                                                                                                                                                                                                                                                                                                                                                                                                                                                                                                                                                                                                                                                                                                                                                                                                                                                                                                                                                                                                | 1.66063  | 0.02317  |         |          |   |         |         |          |   |         |         |         |   |         |          |          |   |         |         |          |   |         |         |         |   |          |          |          |   |         |         |          |   |         |         |         |   |          |          |         |   |          |         |         |   |          |         |         |   |         |         |         |   |          |         |         |   |          |         |         |   |         |         |         |   |         |         |         |   |          |         |         |   |         |         |         |   |          |         |         |                                                                                                                                                          |                                                                                                                                                                                                                                                                                                                                                                                                                                                                                                                                                                                                                                                                                                                                                                                                                                                                                                                                                                                                                                                                                                                                                                                                                                                                                                                                                                                                                                                                                    |          |          |         |          |          |          |         |          |          |          |          |          |          |          |         |          |          |          |         |          |          |          |         |          |          |          |          |          |          |          |         |          |          |          |         |          |          |          |          |          |         |         |                                                                                                                                                         |                                                                                                                                                                                                                                                                                                                                                                                                                                                                                                                                                                                                                                                                                                                                                                                                                                                                                                                                                                                                                                                                                                                                                                                                                                                                                                                                                                                                                                                                                                                                                                                                                                                                                                                                                                                                                                                                                                                                                                                                                                                                                                                                                                                                                                                                                               |   |         |          |          |   |         |          |          |   |         |          |          |   |         |          |          |   |         |          |          |   |         |          |          |   |          |          |          |   |         |          |          |   |         |          |          |   |          |          |          |   |         |         |         |   |          |         |         |   |         |         |         |   |          |         |         |   |          |         |         |   |         |         |         |   |         |          |         |   |          |         |         |   |         |         |         |   |          |         |         |   |          |          |          |   |          |          |          |   |          |          |          |   |          |          |          |   |          |          |          |   |          |          |          |   |          |         |          |   |          |         |          |   |          |         |          |   |          |         |          |    |          |         |         |
| C                                                                                                                                                       | -0.13961                                                                                                                                                                                                                                                                                                                                                                                                                                                                                                                                                                                                                                                                                                                                                                                                                                                                                                                                                                                                                                                                                                                                                                                                                                                                                                                                                                                                                                                                                                                                                                                                                                                                                                                                                                                                                                                                                                                                                                                                                                                                                                                                                                                                                                                                               | -0.35255 | -0.17592 |         |          |   |         |         |          |   |         |         |         |   |         |          |          |   |         |         |          |   |         |         |         |   |          |          |          |   |         |         |          |   |         |         |         |   |          |          |         |   |          |         |         |   |          |         |         |   |         |         |         |   |          |         |         |   |          |         |         |   |         |         |         |   |         |         |         |   |          |         |         |   |         |         |         |   |          |         |         |                                                                                                                                                          |                                                                                                                                                                                                                                                                                                                                                                                                                                                                                                                                                                                                                                                                                                                                                                                                                                                                                                                                                                                                                                                                                                                                                                                                                                                                                                                                                                                                                                                                                    |          |          |         |          |          |          |         |          |          |          |          |          |          |          |         |          |          |          |         |          |          |          |         |          |          |          |          |          |          |          |         |          |          |          |         |          |          |          |          |          |         |         |                                                                                                                                                         |                                                                                                                                                                                                                                                                                                                                                                                                                                                                                                                                                                                                                                                                                                                                                                                                                                                                                                                                                                                                                                                                                                                                                                                                                                                                                                                                                                                                                                                                                                                                                                                                                                                                                                                                                                                                                                                                                                                                                                                                                                                                                                                                                                                                                                                                                               |   |         |          |          |   |         |          |          |   |         |          |          |   |         |          |          |   |         |          |          |   |         |          |          |   |          |          |          |   |         |          |          |   |         |          |          |   |          |          |          |   |         |         |         |   |          |         |         |   |         |         |         |   |          |         |         |   |          |         |         |   |         |         |         |   |         |          |         |   |          |         |         |   |         |         |         |   |          |         |         |   |          |          |          |   |          |          |          |   |          |          |          |   |          |          |          |   |          |          |          |   |          |          |          |   |          |         |          |   |          |         |          |   |          |         |          |   |          |         |          |    |          |         |         |
| H                                                                                                                                                       | 2.29632                                                                                                                                                                                                                                                                                                                                                                                                                                                                                                                                                                                                                                                                                                                                                                                                                                                                                                                                                                                                                                                                                                                                                                                                                                                                                                                                                                                                                                                                                                                                                                                                                                                                                                                                                                                                                                                                                                                                                                                                                                                                                                                                                                                                                                                                                | 2.20620  | -1.71144 |         |          |   |         |         |          |   |         |         |         |   |         |          |          |   |         |         |          |   |         |         |         |   |          |          |          |   |         |         |          |   |         |         |         |   |          |          |         |   |          |         |         |   |          |         |         |   |         |         |         |   |          |         |         |   |          |         |         |   |         |         |         |   |         |         |         |   |          |         |         |   |         |         |         |   |          |         |         |                                                                                                                                                          |                                                                                                                                                                                                                                                                                                                                                                                                                                                                                                                                                                                                                                                                                                                                                                                                                                                                                                                                                                                                                                                                                                                                                                                                                                                                                                                                                                                                                                                                                    |          |          |         |          |          |          |         |          |          |          |          |          |          |          |         |          |          |          |         |          |          |          |         |          |          |          |          |          |          |          |         |          |          |          |         |          |          |          |          |          |         |         |                                                                                                                                                         |                                                                                                                                                                                                                                                                                                                                                                                                                                                                                                                                                                                                                                                                                                                                                                                                                                                                                                                                                                                                                                                                                                                                                                                                                                                                                                                                                                                                                                                                                                                                                                                                                                                                                                                                                                                                                                                                                                                                                                                                                                                                                                                                                                                                                                                                                               |   |         |          |          |   |         |          |          |   |         |          |          |   |         |          |          |   |         |          |          |   |         |          |          |   |          |          |          |   |         |          |          |   |         |          |          |   |          |          |          |   |         |         |         |   |          |         |         |   |         |         |         |   |          |         |         |   |          |         |         |   |         |         |         |   |         |          |         |   |          |         |         |   |         |         |         |   |          |         |         |   |          |          |          |   |          |          |          |   |          |          |          |   |          |          |          |   |          |          |          |   |          |          |          |   |          |         |          |   |          |         |          |   |          |         |          |   |          |         |          |    |          |         |         |
| H                                                                                                                                                       | 1.48055                                                                                                                                                                                                                                                                                                                                                                                                                                                                                                                                                                                                                                                                                                                                                                                                                                                                                                                                                                                                                                                                                                                                                                                                                                                                                                                                                                                                                                                                                                                                                                                                                                                                                                                                                                                                                                                                                                                                                                                                                                                                                                                                                                                                                                                                                | 2.51519  | 0.60477  |         |          |   |         |         |          |   |         |         |         |   |         |          |          |   |         |         |          |   |         |         |         |   |          |          |          |   |         |         |          |   |         |         |         |   |          |          |         |   |          |         |         |   |          |         |         |   |         |         |         |   |          |         |         |   |          |         |         |   |         |         |         |   |         |         |         |   |          |         |         |   |         |         |         |   |          |         |         |                                                                                                                                                          |                                                                                                                                                                                                                                                                                                                                                                                                                                                                                                                                                                                                                                                                                                                                                                                                                                                                                                                                                                                                                                                                                                                                                                                                                                                                                                                                                                                                                                                                                    |          |          |         |          |          |          |         |          |          |          |          |          |          |          |         |          |          |          |         |          |          |          |         |          |          |          |          |          |          |          |         |          |          |          |         |          |          |          |          |          |         |         |                                                                                                                                                         |                                                                                                                                                                                                                                                                                                                                                                                                                                                                                                                                                                                                                                                                                                                                                                                                                                                                                                                                                                                                                                                                                                                                                                                                                                                                                                                                                                                                                                                                                                                                                                                                                                                                                                                                                                                                                                                                                                                                                                                                                                                                                                                                                                                                                                                                                               |   |         |          |          |   |         |          |          |   |         |          |          |   |         |          |          |   |         |          |          |   |         |          |          |   |          |          |          |   |         |          |          |   |         |          |          |   |          |          |          |   |         |         |         |   |          |         |         |   |         |         |         |   |          |         |         |   |          |         |         |   |         |         |         |   |         |          |         |   |          |         |         |   |         |         |         |   |          |         |         |   |          |          |          |   |          |          |          |   |          |          |          |   |          |          |          |   |          |          |          |   |          |          |          |   |          |         |          |   |          |         |          |   |          |         |          |   |          |         |          |    |          |         |         |
| H                                                                                                                                                       | -0.81909                                                                                                                                                                                                                                                                                                                                                                                                                                                                                                                                                                                                                                                                                                                                                                                                                                                                                                                                                                                                                                                                                                                                                                                                                                                                                                                                                                                                                                                                                                                                                                                                                                                                                                                                                                                                                                                                                                                                                                                                                                                                                                                                                                                                                                                                               | -1.07172 | 0.26006  |         |          |   |         |         |          |   |         |         |         |   |         |          |          |   |         |         |          |   |         |         |         |   |          |          |          |   |         |         |          |   |         |         |         |   |          |          |         |   |          |         |         |   |          |         |         |   |         |         |         |   |          |         |         |   |          |         |         |   |         |         |         |   |         |         |         |   |          |         |         |   |         |         |         |   |          |         |         |                                                                                                                                                          |                                                                                                                                                                                                                                                                                                                                                                                                                                                                                                                                                                                                                                                                                                                                                                                                                                                                                                                                                                                                                                                                                                                                                                                                                                                                                                                                                                                                                                                                                    |          |          |         |          |          |          |         |          |          |          |          |          |          |          |         |          |          |          |         |          |          |          |         |          |          |          |          |          |          |          |         |          |          |          |         |          |          |          |          |          |         |         |                                                                                                                                                         |                                                                                                                                                                                                                                                                                                                                                                                                                                                                                                                                                                                                                                                                                                                                                                                                                                                                                                                                                                                                                                                                                                                                                                                                                                                                                                                                                                                                                                                                                                                                                                                                                                                                                                                                                                                                                                                                                                                                                                                                                                                                                                                                                                                                                                                                                               |   |         |          |          |   |         |          |          |   |         |          |          |   |         |          |          |   |         |          |          |   |         |          |          |   |          |          |          |   |         |          |          |   |         |          |          |   |          |          |          |   |         |         |         |   |          |         |         |   |         |         |         |   |          |         |         |   |          |         |         |   |         |         |         |   |         |          |         |   |          |         |         |   |         |         |         |   |          |         |         |   |          |          |          |   |          |          |          |   |          |          |          |   |          |          |          |   |          |          |          |   |          |          |          |   |          |         |          |   |          |         |          |   |          |         |          |   |          |         |          |    |          |         |         |
| C                                                                                                                                                       | -0.18185                                                                                                                                                                                                                                                                                                                                                                                                                                                                                                                                                                                                                                                                                                                                                                                                                                                                                                                                                                                                                                                                                                                                                                                                                                                                                                                                                                                                                                                                                                                                                                                                                                                                                                                                                                                                                                                                                                                                                                                                                                                                                                                                                                                                                                                                               | 0.91515  | 1.98668  |         |          |   |         |         |          |   |         |         |         |   |         |          |          |   |         |         |          |   |         |         |         |   |          |          |          |   |         |         |          |   |         |         |         |   |          |          |         |   |          |         |         |   |          |         |         |   |         |         |         |   |          |         |         |   |          |         |         |   |         |         |         |   |         |         |         |   |          |         |         |   |         |         |         |   |          |         |         |                                                                                                                                                          |                                                                                                                                                                                                                                                                                                                                                                                                                                                                                                                                                                                                                                                                                                                                                                                                                                                                                                                                                                                                                                                                                                                                                                                                                                                                                                                                                                                                                                                                                    |          |          |         |          |          |          |         |          |          |          |          |          |          |          |         |          |          |          |         |          |          |          |         |          |          |          |          |          |          |          |         |          |          |          |         |          |          |          |          |          |         |         |                                                                                                                                                         |                                                                                                                                                                                                                                                                                                                                                                                                                                                                                                                                                                                                                                                                                                                                                                                                                                                                                                                                                                                                                                                                                                                                                                                                                                                                                                                                                                                                                                                                                                                                                                                                                                                                                                                                                                                                                                                                                                                                                                                                                                                                                                                                                                                                                                                                                               |   |         |          |          |   |         |          |          |   |         |          |          |   |         |          |          |   |         |          |          |   |         |          |          |   |          |          |          |   |         |          |          |   |         |          |          |   |          |          |          |   |         |         |         |   |          |         |         |   |         |         |         |   |          |         |         |   |          |         |         |   |         |         |         |   |         |          |         |   |          |         |         |   |         |         |         |   |          |         |         |   |          |          |          |   |          |          |          |   |          |          |          |   |          |          |          |   |          |          |          |   |          |          |          |   |          |         |          |   |          |         |          |   |          |         |          |   |          |         |          |    |          |         |         |
| C                                                                                                                                                       | -0.88187                                                                                                                                                                                                                                                                                                                                                                                                                                                                                                                                                                                                                                                                                                                                                                                                                                                                                                                                                                                                                                                                                                                                                                                                                                                                                                                                                                                                                                                                                                                                                                                                                                                                                                                                                                                                                                                                                                                                                                                                                                                                                                                                                                                                                                                                               | 1.23943  | 4.70012  |         |          |   |         |         |          |   |         |         |         |   |         |          |          |   |         |         |          |   |         |         |         |   |          |          |          |   |         |         |          |   |         |         |         |   |          |          |         |   |          |         |         |   |          |         |         |   |         |         |         |   |          |         |         |   |          |         |         |   |         |         |         |   |         |         |         |   |          |         |         |   |         |         |         |   |          |         |         |                                                                                                                                                          |                                                                                                                                                                                                                                                                                                                                                                                                                                                                                                                                                                                                                                                                                                                                                                                                                                                                                                                                                                                                                                                                                                                                                                                                                                                                                                                                                                                                                                                                                    |          |          |         |          |          |          |         |          |          |          |          |          |          |          |         |          |          |          |         |          |          |          |         |          |          |          |          |          |          |          |         |          |          |          |         |          |          |          |          |          |         |         |                                                                                                                                                         |                                                                                                                                                                                                                                                                                                                                                                                                                                                                                                                                                                                                                                                                                                                                                                                                                                                                                                                                                                                                                                                                                                                                                                                                                                                                                                                                                                                                                                                                                                                                                                                                                                                                                                                                                                                                                                                                                                                                                                                                                                                                                                                                                                                                                                                                                               |   |         |          |          |   |         |          |          |   |         |          |          |   |         |          |          |   |         |          |          |   |         |          |          |   |          |          |          |   |         |          |          |   |         |          |          |   |          |          |          |   |         |         |         |   |          |         |         |   |         |         |         |   |          |         |         |   |          |         |         |   |         |         |         |   |         |          |         |   |          |         |         |   |         |         |         |   |          |         |         |   |          |          |          |   |          |          |          |   |          |          |          |   |          |          |          |   |          |          |          |   |          |          |          |   |          |         |          |   |          |         |          |   |          |         |          |   |          |         |          |    |          |         |         |
| C                                                                                                                                                       | 0.79038                                                                                                                                                                                                                                                                                                                                                                                                                                                                                                                                                                                                                                                                                                                                                                                                                                                                                                                                                                                                                                                                                                                                                                                                                                                                                                                                                                                                                                                                                                                                                                                                                                                                                                                                                                                                                                                                                                                                                                                                                                                                                                                                                                                                                                                                                | 1.07956  | 2.98397  |         |          |   |         |         |          |   |         |         |         |   |         |          |          |   |         |         |          |   |         |         |         |   |          |          |          |   |         |         |          |   |         |         |         |   |          |          |         |   |          |         |         |   |          |         |         |   |         |         |         |   |          |         |         |   |          |         |         |   |         |         |         |   |         |         |         |   |          |         |         |   |         |         |         |   |          |         |         |                                                                                                                                                          |                                                                                                                                                                                                                                                                                                                                                                                                                                                                                                                                                                                                                                                                                                                                                                                                                                                                                                                                                                                                                                                                                                                                                                                                                                                                                                                                                                                                                                                                                    |          |          |         |          |          |          |         |          |          |          |          |          |          |          |         |          |          |          |         |          |          |          |         |          |          |          |          |          |          |          |         |          |          |          |         |          |          |          |          |          |         |         |                                                                                                                                                         |                                                                                                                                                                                                                                                                                                                                                                                                                                                                                                                                                                                                                                                                                                                                                                                                                                                                                                                                                                                                                                                                                                                                                                                                                                                                                                                                                                                                                                                                                                                                                                                                                                                                                                                                                                                                                                                                                                                                                                                                                                                                                                                                                                                                                                                                                               |   |         |          |          |   |         |          |          |   |         |          |          |   |         |          |          |   |         |          |          |   |         |          |          |   |          |          |          |   |         |          |          |   |         |          |          |   |          |          |          |   |         |         |         |   |          |         |         |   |         |         |         |   |          |         |         |   |          |         |         |   |         |         |         |   |         |          |         |   |          |         |         |   |         |         |         |   |          |         |         |   |          |          |          |   |          |          |          |   |          |          |          |   |          |          |          |   |          |          |          |   |          |          |          |   |          |         |          |   |          |         |          |   |          |         |          |   |          |         |          |    |          |         |         |
| C                                                                                                                                                       | -1.52077                                                                                                                                                                                                                                                                                                                                                                                                                                                                                                                                                                                                                                                                                                                                                                                                                                                                                                                                                                                                                                                                                                                                                                                                                                                                                                                                                                                                                                                                                                                                                                                                                                                                                                                                                                                                                                                                                                                                                                                                                                                                                                                                                                                                                                                                               | 0.93383  | 2.39893  |         |          |   |         |         |          |   |         |         |         |   |         |          |          |   |         |         |          |   |         |         |         |   |          |          |          |   |         |         |          |   |         |         |         |   |          |          |         |   |          |         |         |   |          |         |         |   |         |         |         |   |          |         |         |   |          |         |         |   |         |         |         |   |         |         |         |   |          |         |         |   |         |         |         |   |          |         |         |                                                                                                                                                          |                                                                                                                                                                                                                                                                                                                                                                                                                                                                                                                                                                                                                                                                                                                                                                                                                                                                                                                                                                                                                                                                                                                                                                                                                                                                                                                                                                                                                                                                                    |          |          |         |          |          |          |         |          |          |          |          |          |          |          |         |          |          |          |         |          |          |          |         |          |          |          |          |          |          |          |         |          |          |          |         |          |          |          |          |          |         |         |                                                                                                                                                         |                                                                                                                                                                                                                                                                                                                                                                                                                                                                                                                                                                                                                                                                                                                                                                                                                                                                                                                                                                                                                                                                                                                                                                                                                                                                                                                                                                                                                                                                                                                                                                                                                                                                                                                                                                                                                                                                                                                                                                                                                                                                                                                                                                                                                                                                                               |   |         |          |          |   |         |          |          |   |         |          |          |   |         |          |          |   |         |          |          |   |         |          |          |   |          |          |          |   |         |          |          |   |         |          |          |   |          |          |          |   |         |         |         |   |          |         |         |   |         |         |         |   |          |         |         |   |          |         |         |   |         |         |         |   |         |          |         |   |          |         |         |   |         |         |         |   |          |         |         |   |          |          |          |   |          |          |          |   |          |          |          |   |          |          |          |   |          |          |          |   |          |          |          |   |          |         |          |   |          |         |          |   |          |         |          |   |          |         |          |    |          |         |         |
| C                                                                                                                                                       | -1.87122                                                                                                                                                                                                                                                                                                                                                                                                                                                                                                                                                                                                                                                                                                                                                                                                                                                                                                                                                                                                                                                                                                                                                                                                                                                                                                                                                                                                                                                                                                                                                                                                                                                                                                                                                                                                                                                                                                                                                                                                                                                                                                                                                                                                                                                                               | 1.09051  | 3.73650  |         |          |   |         |         |          |   |         |         |         |   |         |          |          |   |         |         |          |   |         |         |         |   |          |          |          |   |         |         |          |   |         |         |         |   |          |          |         |   |          |         |         |   |          |         |         |   |         |         |         |   |          |         |         |   |          |         |         |   |         |         |         |   |         |         |         |   |          |         |         |   |         |         |         |   |          |         |         |                                                                                                                                                          |                                                                                                                                                                                                                                                                                                                                                                                                                                                                                                                                                                                                                                                                                                                                                                                                                                                                                                                                                                                                                                                                                                                                                                                                                                                                                                                                                                                                                                                                                    |          |          |         |          |          |          |         |          |          |          |          |          |          |          |         |          |          |          |         |          |          |          |         |          |          |          |          |          |          |          |         |          |          |          |         |          |          |          |          |          |         |         |                                                                                                                                                         |                                                                                                                                                                                                                                                                                                                                                                                                                                                                                                                                                                                                                                                                                                                                                                                                                                                                                                                                                                                                                                                                                                                                                                                                                                                                                                                                                                                                                                                                                                                                                                                                                                                                                                                                                                                                                                                                                                                                                                                                                                                                                                                                                                                                                                                                                               |   |         |          |          |   |         |          |          |   |         |          |          |   |         |          |          |   |         |          |          |   |         |          |          |   |          |          |          |   |         |          |          |   |         |          |          |   |          |          |          |   |         |         |         |   |          |         |         |   |         |         |         |   |          |         |         |   |          |         |         |   |         |         |         |   |         |          |         |   |          |         |         |   |         |         |         |   |          |         |         |   |          |          |          |   |          |          |          |   |          |          |          |   |          |          |          |   |          |          |          |   |          |          |          |   |          |         |          |   |          |         |          |   |          |         |          |   |          |         |          |    |          |         |         |
| C                                                                                                                                                       | 0.45584                                                                                                                                                                                                                                                                                                                                                                                                                                                                                                                                                                                                                                                                                                                                                                                                                                                                                                                                                                                                                                                                                                                                                                                                                                                                                                                                                                                                                                                                                                                                                                                                                                                                                                                                                                                                                                                                                                                                                                                                                                                                                                                                                                                                                                                                                | 1.23914  | 4.32068  |         |          |   |         |         |          |   |         |         |         |   |         |          |          |   |         |         |          |   |         |         |         |   |          |          |          |   |         |         |          |   |         |         |         |   |          |          |         |   |          |         |         |   |          |         |         |   |         |         |         |   |          |         |         |   |          |         |         |   |         |         |         |   |         |         |         |   |          |         |         |   |         |         |         |   |          |         |         |                                                                                                                                                          |                                                                                                                                                                                                                                                                                                                                                                                                                                                                                                                                                                                                                                                                                                                                                                                                                                                                                                                                                                                                                                                                                                                                                                                                                                                                                                                                                                                                                                                                                    |          |          |         |          |          |          |         |          |          |          |          |          |          |          |         |          |          |          |         |          |          |          |         |          |          |          |          |          |          |          |         |          |          |          |         |          |          |          |          |          |         |         |                                                                                                                                                         |                                                                                                                                                                                                                                                                                                                                                                                                                                                                                                                                                                                                                                                                                                                                                                                                                                                                                                                                                                                                                                                                                                                                                                                                                                                                                                                                                                                                                                                                                                                                                                                                                                                                                                                                                                                                                                                                                                                                                                                                                                                                                                                                                                                                                                                                                               |   |         |          |          |   |         |          |          |   |         |          |          |   |         |          |          |   |         |          |          |   |         |          |          |   |          |          |          |   |         |          |          |   |         |          |          |   |          |          |          |   |         |         |         |   |          |         |         |   |         |         |         |   |          |         |         |   |          |         |         |   |         |         |         |   |         |          |         |   |          |         |         |   |         |         |         |   |          |         |         |   |          |          |          |   |          |          |          |   |          |          |          |   |          |          |          |   |          |          |          |   |          |          |          |   |          |         |          |   |          |         |          |   |          |         |          |   |          |         |          |    |          |         |         |
| H                                                                                                                                                       | 1.82992                                                                                                                                                                                                                                                                                                                                                                                                                                                                                                                                                                                                                                                                                                                                                                                                                                                                                                                                                                                                                                                                                                                                                                                                                                                                                                                                                                                                                                                                                                                                                                                                                                                                                                                                                                                                                                                                                                                                                                                                                                                                                                                                                                                                                                                                                | 1.06335  | 2.68438  |         |          |   |         |         |          |   |         |         |         |   |         |          |          |   |         |         |          |   |         |         |         |   |          |          |          |   |         |         |          |   |         |         |         |   |          |          |         |   |          |         |         |   |          |         |         |   |         |         |         |   |          |         |         |   |          |         |         |   |         |         |         |   |         |         |         |   |          |         |         |   |         |         |         |   |          |         |         |                                                                                                                                                          |                                                                                                                                                                                                                                                                                                                                                                                                                                                                                                                                                                                                                                                                                                                                                                                                                                                                                                                                                                                                                                                                                                                                                                                                                                                                                                                                                                                                                                                                                    |          |          |         |          |          |          |         |          |          |          |          |          |          |          |         |          |          |          |         |          |          |          |         |          |          |          |          |          |          |          |         |          |          |          |         |          |          |          |          |          |         |         |                                                                                                                                                         |                                                                                                                                                                                                                                                                                                                                                                                                                                                                                                                                                                                                                                                                                                                                                                                                                                                                                                                                                                                                                                                                                                                                                                                                                                                                                                                                                                                                                                                                                                                                                                                                                                                                                                                                                                                                                                                                                                                                                                                                                                                                                                                                                                                                                                                                                               |   |         |          |          |   |         |          |          |   |         |          |          |   |         |          |          |   |         |          |          |   |         |          |          |   |          |          |          |   |         |          |          |   |         |          |          |   |          |          |          |   |         |         |         |   |          |         |         |   |         |         |         |   |          |         |         |   |          |         |         |   |         |         |         |   |         |          |         |   |          |         |         |   |         |         |         |   |          |         |         |   |          |          |          |   |          |          |          |   |          |          |          |   |          |          |          |   |          |          |          |   |          |          |          |   |          |         |          |   |          |         |          |   |          |         |          |   |          |         |          |    |          |         |         |
| H                                                                                                                                                       | -2.91437                                                                                                                                                                                                                                                                                                                                                                                                                                                                                                                                                                                                                                                                                                                                                                                                                                                                                                                                                                                                                                                                                                                                                                                                                                                                                                                                                                                                                                                                                                                                                                                                                                                                                                                                                                                                                                                                                                                                                                                                                                                                                                                                                                                                                                                                               | 1.10691  | 4.01801  |         |          |   |         |         |          |   |         |         |         |   |         |          |          |   |         |         |          |   |         |         |         |   |          |          |          |   |         |         |          |   |         |         |         |   |          |          |         |   |          |         |         |   |          |         |         |   |         |         |         |   |          |         |         |   |          |         |         |   |         |         |         |   |         |         |         |   |          |         |         |   |         |         |         |   |          |         |         |                                                                                                                                                          |                                                                                                                                                                                                                                                                                                                                                                                                                                                                                                                                                                                                                                                                                                                                                                                                                                                                                                                                                                                                                                                                                                                                                                                                                                                                                                                                                                                                                                                                                    |          |          |         |          |          |          |         |          |          |          |          |          |          |          |         |          |          |          |         |          |          |          |         |          |          |          |          |          |          |          |         |          |          |          |         |          |          |          |          |          |         |         |                                                                                                                                                         |                                                                                                                                                                                                                                                                                                                                                                                                                                                                                                                                                                                                                                                                                                                                                                                                                                                                                                                                                                                                                                                                                                                                                                                                                                                                                                                                                                                                                                                                                                                                                                                                                                                                                                                                                                                                                                                                                                                                                                                                                                                                                                                                                                                                                                                                                               |   |         |          |          |   |         |          |          |   |         |          |          |   |         |          |          |   |         |          |          |   |         |          |          |   |          |          |          |   |         |          |          |   |         |          |          |   |          |          |          |   |         |         |         |   |          |         |         |   |         |         |         |   |          |         |         |   |          |         |         |   |         |         |         |   |         |          |         |   |          |         |         |   |         |         |         |   |          |         |         |   |          |          |          |   |          |          |          |   |          |          |          |   |          |          |          |   |          |          |          |   |          |          |          |   |          |         |          |   |          |         |          |   |          |         |          |   |          |         |          |    |          |         |         |
| H                                                                                                                                                       | 1.23541                                                                                                                                                                                                                                                                                                                                                                                                                                                                                                                                                                                                                                                                                                                                                                                                                                                                                                                                                                                                                                                                                                                                                                                                                                                                                                                                                                                                                                                                                                                                                                                                                                                                                                                                                                                                                                                                                                                                                                                                                                                                                                                                                                                                                                                                                | 1.35603  | 5.06170  |         |          |   |         |         |          |   |         |         |         |   |         |          |          |   |         |         |          |   |         |         |         |   |          |          |          |   |         |         |          |   |         |         |         |   |          |          |         |   |          |         |         |   |          |         |         |   |         |         |         |   |          |         |         |   |          |         |         |   |         |         |         |   |         |         |         |   |          |         |         |   |         |         |         |   |          |         |         |                                                                                                                                                          |                                                                                                                                                                                                                                                                                                                                                                                                                                                                                                                                                                                                                                                                                                                                                                                                                                                                                                                                                                                                                                                                                                                                                                                                                                                                                                                                                                                                                                                                                    |          |          |         |          |          |          |         |          |          |          |          |          |          |          |         |          |          |          |         |          |          |          |         |          |          |          |          |          |          |          |         |          |          |          |         |          |          |          |          |          |         |         |                                                                                                                                                         |                                                                                                                                                                                                                                                                                                                                                                                                                                                                                                                                                                                                                                                                                                                                                                                                                                                                                                                                                                                                                                                                                                                                                                                                                                                                                                                                                                                                                                                                                                                                                                                                                                                                                                                                                                                                                                                                                                                                                                                                                                                                                                                                                                                                                                                                                               |   |         |          |          |   |         |          |          |   |         |          |          |   |         |          |          |   |         |          |          |   |         |          |          |   |          |          |          |   |         |          |          |   |         |          |          |   |          |          |          |   |         |         |         |   |          |         |         |   |         |         |         |   |          |         |         |   |          |         |         |   |         |         |         |   |         |          |         |   |          |         |         |   |         |         |         |   |          |         |         |   |          |          |          |   |          |          |          |   |          |          |          |   |          |          |          |   |          |          |          |   |          |          |          |   |          |         |          |   |          |         |          |   |          |         |          |   |          |         |          |    |          |         |         |
| H                                                                                                                                                       | -1.16095                                                                                                                                                                                                                                                                                                                                                                                                                                                                                                                                                                                                                                                                                                                                                                                                                                                                                                                                                                                                                                                                                                                                                                                                                                                                                                                                                                                                                                                                                                                                                                                                                                                                                                                                                                                                                                                                                                                                                                                                                                                                                                                                                                                                                                                                               | 1.35972  | 5.73851  |         |          |   |         |         |          |   |         |         |         |   |         |          |          |   |         |         |          |   |         |         |         |   |          |          |          |   |         |         |          |   |         |         |         |   |          |          |         |   |          |         |         |   |          |         |         |   |         |         |         |   |          |         |         |   |          |         |         |   |         |         |         |   |         |         |         |   |          |         |         |   |         |         |         |   |          |         |         |                                                                                                                                                          |                                                                                                                                                                                                                                                                                                                                                                                                                                                                                                                                                                                                                                                                                                                                                                                                                                                                                                                                                                                                                                                                                                                                                                                                                                                                                                                                                                                                                                                                                    |          |          |         |          |          |          |         |          |          |          |          |          |          |          |         |          |          |          |         |          |          |          |         |          |          |          |          |          |          |          |         |          |          |          |         |          |          |          |          |          |         |         |                                                                                                                                                         |                                                                                                                                                                                                                                                                                                                                                                                                                                                                                                                                                                                                                                                                                                                                                                                                                                                                                                                                                                                                                                                                                                                                                                                                                                                                                                                                                                                                                                                                                                                                                                                                                                                                                                                                                                                                                                                                                                                                                                                                                                                                                                                                                                                                                                                                                               |   |         |          |          |   |         |          |          |   |         |          |          |   |         |          |          |   |         |          |          |   |         |          |          |   |          |          |          |   |         |          |          |   |         |          |          |   |          |          |          |   |         |         |         |   |          |         |         |   |         |         |         |   |          |         |         |   |          |         |         |   |         |         |         |   |         |          |         |   |          |         |         |   |         |         |         |   |          |         |         |   |          |          |          |   |          |          |          |   |          |          |          |   |          |          |          |   |          |          |          |   |          |          |          |   |          |         |          |   |          |         |          |   |          |         |          |   |          |         |          |    |          |         |         |
| C                                                                                                                                                       | -0.16438                                                                                                                                                                                                                                                                                                                                                                                                                                                                                                                                                                                                                                                                                                                                                                                                                                                                                                                                                                                                                                                                                                                                                                                                                                                                                                                                                                                                                                                                                                                                                                                                                                                                                                                                                                                                                                                                                                                                                                                                                                                                                                                                                                                                                                                                               | -1.73271 | -2.28725 |         |          |   |         |         |          |   |         |         |         |   |         |          |          |   |         |         |          |   |         |         |         |   |          |          |          |   |         |         |          |   |         |         |         |   |          |          |         |   |          |         |         |   |          |         |         |   |         |         |         |   |          |         |         |   |          |         |         |   |         |         |         |   |         |         |         |   |          |         |         |   |         |         |         |   |          |         |         |                                                                                                                                                          |                                                                                                                                                                                                                                                                                                                                                                                                                                                                                                                                                                                                                                                                                                                                                                                                                                                                                                                                                                                                                                                                                                                                                                                                                                                                                                                                                                                                                                                                                    |          |          |         |          |          |          |         |          |          |          |          |          |          |          |         |          |          |          |         |          |          |          |         |          |          |          |          |          |          |          |         |          |          |          |         |          |          |          |          |          |         |         |                                                                                                                                                         |                                                                                                                                                                                                                                                                                                                                                                                                                                                                                                                                                                                                                                                                                                                                                                                                                                                                                                                                                                                                                                                                                                                                                                                                                                                                                                                                                                                                                                                                                                                                                                                                                                                                                                                                                                                                                                                                                                                                                                                                                                                                                                                                                                                                                                                                                               |   |         |          |          |   |         |          |          |   |         |          |          |   |         |          |          |   |         |          |          |   |         |          |          |   |          |          |          |   |         |          |          |   |         |          |          |   |          |          |          |   |         |         |         |   |          |         |         |   |         |         |         |   |          |         |         |   |          |         |         |   |         |         |         |   |         |          |         |   |          |         |         |   |         |         |         |   |          |         |         |   |          |          |          |   |          |          |          |   |          |          |          |   |          |          |          |   |          |          |          |   |          |          |          |   |          |         |          |   |          |         |          |   |          |         |          |   |          |         |          |    |          |         |         |
| H                                                                                                                                                       | 0.32031                                                                                                                                                                                                                                                                                                                                                                                                                                                                                                                                                                                                                                                                                                                                                                                                                                                                                                                                                                                                                                                                                                                                                                                                                                                                                                                                                                                                                                                                                                                                                                                                                                                                                                                                                                                                                                                                                                                                                                                                                                                                                                                                                                                                                                                                                | -1.68041 | -3.26618 |         |          |   |         |         |          |   |         |         |         |   |         |          |          |   |         |         |          |   |         |         |         |   |          |          |          |   |         |         |          |   |         |         |         |   |          |          |         |   |          |         |         |   |          |         |         |   |         |         |         |   |          |         |         |   |          |         |         |   |         |         |         |   |         |         |         |   |          |         |         |   |         |         |         |   |          |         |         |                                                                                                                                                          |                                                                                                                                                                                                                                                                                                                                                                                                                                                                                                                                                                                                                                                                                                                                                                                                                                                                                                                                                                                                                                                                                                                                                                                                                                                                                                                                                                                                                                                                                    |          |          |         |          |          |          |         |          |          |          |          |          |          |          |         |          |          |          |         |          |          |          |         |          |          |          |          |          |          |          |         |          |          |          |         |          |          |          |          |          |         |         |                                                                                                                                                         |                                                                                                                                                                                                                                                                                                                                                                                                                                                                                                                                                                                                                                                                                                                                                                                                                                                                                                                                                                                                                                                                                                                                                                                                                                                                                                                                                                                                                                                                                                                                                                                                                                                                                                                                                                                                                                                                                                                                                                                                                                                                                                                                                                                                                                                                                               |   |         |          |          |   |         |          |          |   |         |          |          |   |         |          |          |   |         |          |          |   |         |          |          |   |          |          |          |   |         |          |          |   |         |          |          |   |          |          |          |   |         |         |         |   |          |         |         |   |         |         |         |   |          |         |         |   |          |         |         |   |         |         |         |   |         |          |         |   |          |         |         |   |         |         |         |   |          |         |         |   |          |          |          |   |          |          |          |   |          |          |          |   |          |          |          |   |          |          |          |   |          |          |          |   |          |         |          |   |          |         |          |   |          |         |          |   |          |         |          |    |          |         |         |
| C                                                                                                                                                       | 0.24071                                                                                                                                                                                                                                                                                                                                                                                                                                                                                                                                                                                                                                                                                                                                                                                                                                                                                                                                                                                                                                                                                                                                                                                                                                                                                                                                                                                                                                                                                                                                                                                                                                                                                                                                                                                                                                                                                                                                                                                                                                                                                                                                                                                                                                                                                | -3.05618 | -1.62540 |         |          |   |         |         |          |   |         |         |         |   |         |          |          |   |         |         |          |   |         |         |         |   |          |          |          |   |         |         |          |   |         |         |         |   |          |          |         |   |          |         |         |   |          |         |         |   |         |         |         |   |          |         |         |   |          |         |         |   |         |         |         |   |         |         |         |   |          |         |         |   |         |         |         |   |          |         |         |                                                                                                                                                          |                                                                                                                                                                                                                                                                                                                                                                                                                                                                                                                                                                                                                                                                                                                                                                                                                                                                                                                                                                                                                                                                                                                                                                                                                                                                                                                                                                                                                                                                                    |          |          |         |          |          |          |         |          |          |          |          |          |          |          |         |          |          |          |         |          |          |          |         |          |          |          |          |          |          |          |         |          |          |          |         |          |          |          |          |          |         |         |                                                                                                                                                         |                                                                                                                                                                                                                                                                                                                                                                                                                                                                                                                                                                                                                                                                                                                                                                                                                                                                                                                                                                                                                                                                                                                                                                                                                                                                                                                                                                                                                                                                                                                                                                                                                                                                                                                                                                                                                                                                                                                                                                                                                                                                                                                                                                                                                                                                                               |   |         |          |          |   |         |          |          |   |         |          |          |   |         |          |          |   |         |          |          |   |         |          |          |   |          |          |          |   |         |          |          |   |         |          |          |   |          |          |          |   |         |         |         |   |          |         |         |   |         |         |         |   |          |         |         |   |          |         |         |   |         |         |         |   |         |          |         |   |          |         |         |   |         |         |         |   |          |         |         |   |          |          |          |   |          |          |          |   |          |          |          |   |          |          |          |   |          |          |          |   |          |          |          |   |          |         |          |   |          |         |          |   |          |         |          |   |          |         |          |    |          |         |         |
| H                                                                                                                                                       | -0.23059                                                                                                                                                                                                                                                                                                                                                                                                                                                                                                                                                                                                                                                                                                                                                                                                                                                                                                                                                                                                                                                                                                                                                                                                                                                                                                                                                                                                                                                                                                                                                                                                                                                                                                                                                                                                                                                                                                                                                                                                                                                                                                                                                                                                                                                                               | -3.15105 | -0.64432 |         |          |   |         |         |          |   |         |         |         |   |         |          |          |   |         |         |          |   |         |         |         |   |          |          |          |   |         |         |          |   |         |         |         |   |          |          |         |   |          |         |         |   |          |         |         |   |         |         |         |   |          |         |         |   |          |         |         |   |         |         |         |   |         |         |         |   |          |         |         |   |         |         |         |   |          |         |         |                                                                                                                                                          |                                                                                                                                                                                                                                                                                                                                                                                                                                                                                                                                                                                                                                                                                                                                                                                                                                                                                                                                                                                                                                                                                                                                                                                                                                                                                                                                                                                                                                                                                    |          |          |         |          |          |          |         |          |          |          |          |          |          |          |         |          |          |          |         |          |          |          |         |          |          |          |          |          |          |          |         |          |          |          |         |          |          |          |          |          |         |         |                                                                                                                                                         |                                                                                                                                                                                                                                                                                                                                                                                                                                                                                                                                                                                                                                                                                                                                                                                                                                                                                                                                                                                                                                                                                                                                                                                                                                                                                                                                                                                                                                                                                                                                                                                                                                                                                                                                                                                                                                                                                                                                                                                                                                                                                                                                                                                                                                                                                               |   |         |          |          |   |         |          |          |   |         |          |          |   |         |          |          |   |         |          |          |   |         |          |          |   |          |          |          |   |         |          |          |   |         |          |          |   |          |          |          |   |         |         |         |   |          |         |         |   |         |         |         |   |          |         |         |   |          |         |         |   |         |         |         |   |         |          |         |   |          |         |         |   |         |         |         |   |          |         |         |   |          |          |          |   |          |          |          |   |          |          |          |   |          |          |          |   |          |          |          |   |          |          |          |   |          |         |          |   |          |         |          |   |          |         |          |   |          |         |          |    |          |         |         |
| H                                                                                                                                                       | 1.32227                                                                                                                                                                                                                                                                                                                                                                                                                                                                                                                                                                                                                                                                                                                                                                                                                                                                                                                                                                                                                                                                                                                                                                                                                                                                                                                                                                                                                                                                                                                                                                                                                                                                                                                                                                                                                                                                                                                                                                                                                                                                                                                                                                                                                                                                                | -3.11368 | -1.48867 |         |          |   |         |         |          |   |         |         |         |   |         |          |          |   |         |         |          |   |         |         |         |   |          |          |          |   |         |         |          |   |         |         |         |   |          |          |         |   |          |         |         |   |          |         |         |   |         |         |         |   |          |         |         |   |          |         |         |   |         |         |         |   |         |         |         |   |          |         |         |   |         |         |         |   |          |         |         |                                                                                                                                                          |                                                                                                                                                                                                                                                                                                                                                                                                                                                                                                                                                                                                                                                                                                                                                                                                                                                                                                                                                                                                                                                                                                                                                                                                                                                                                                                                                                                                                                                                                    |          |          |         |          |          |          |         |          |          |          |          |          |          |          |         |          |          |          |         |          |          |          |         |          |          |          |          |          |          |          |         |          |          |          |         |          |          |          |          |          |         |         |                                                                                                                                                         |                                                                                                                                                                                                                                                                                                                                                                                                                                                                                                                                                                                                                                                                                                                                                                                                                                                                                                                                                                                                                                                                                                                                                                                                                                                                                                                                                                                                                                                                                                                                                                                                                                                                                                                                                                                                                                                                                                                                                                                                                                                                                                                                                                                                                                                                                               |   |         |          |          |   |         |          |          |   |         |          |          |   |         |          |          |   |         |          |          |   |         |          |          |   |          |          |          |   |         |          |          |   |         |          |          |   |          |          |          |   |         |         |         |   |          |         |         |   |         |         |         |   |          |         |         |   |          |         |         |   |         |         |         |   |         |          |         |   |          |         |         |   |         |         |         |   |          |         |         |   |          |          |          |   |          |          |          |   |          |          |          |   |          |          |          |   |          |          |          |   |          |          |          |   |          |         |          |   |          |         |          |   |          |         |          |   |          |         |          |    |          |         |         |
| H                                                                                                                                                       | -0.07995                                                                                                                                                                                                                                                                                                                                                                                                                                                                                                                                                                                                                                                                                                                                                                                                                                                                                                                                                                                                                                                                                                                                                                                                                                                                                                                                                                                                                                                                                                                                                                                                                                                                                                                                                                                                                                                                                                                                                                                                                                                                                                                                                                                                                                                                               | -3.90219 | -2.23784 |         |          |   |         |         |          |   |         |         |         |   |         |          |          |   |         |         |          |   |         |         |         |   |          |          |          |   |         |         |          |   |         |         |         |   |          |          |         |   |          |         |         |   |          |         |         |   |         |         |         |   |          |         |         |   |          |         |         |   |         |         |         |   |         |         |         |   |          |         |         |   |         |         |         |   |          |         |         |                                                                                                                                                          |                                                                                                                                                                                                                                                                                                                                                                                                                                                                                                                                                                                                                                                                                                                                                                                                                                                                                                                                                                                                                                                                                                                                                                                                                                                                                                                                                                                                                                                                                    |          |          |         |          |          |          |         |          |          |          |          |          |          |          |         |          |          |          |         |          |          |          |         |          |          |          |          |          |          |          |         |          |          |          |         |          |          |          |          |          |         |         |                                                                                                                                                         |                                                                                                                                                                                                                                                                                                                                                                                                                                                                                                                                                                                                                                                                                                                                                                                                                                                                                                                                                                                                                                                                                                                                                                                                                                                                                                                                                                                                                                                                                                                                                                                                                                                                                                                                                                                                                                                                                                                                                                                                                                                                                                                                                                                                                                                                                               |   |         |          |          |   |         |          |          |   |         |          |          |   |         |          |          |   |         |          |          |   |         |          |          |   |          |          |          |   |         |          |          |   |         |          |          |   |          |          |          |   |         |         |         |   |          |         |         |   |         |         |         |   |          |         |         |   |          |         |         |   |         |         |         |   |         |          |         |   |          |         |         |   |         |         |         |   |          |         |         |   |          |          |          |   |          |          |          |   |          |          |          |   |          |          |          |   |          |          |          |   |          |          |          |   |          |         |          |   |          |         |          |   |          |         |          |   |          |         |          |    |          |         |         |
| C                                                                                                                                                       | -1.68323                                                                                                                                                                                                                                                                                                                                                                                                                                                                                                                                                                                                                                                                                                                                                                                                                                                                                                                                                                                                                                                                                                                                                                                                                                                                                                                                                                                                                                                                                                                                                                                                                                                                                                                                                                                                                                                                                                                                                                                                                                                                                                                                                                                                                                                                               | -1.68395 | -2.50182 |         |          |   |         |         |          |   |         |         |         |   |         |          |          |   |         |         |          |   |         |         |         |   |          |          |          |   |         |         |          |   |         |         |         |   |          |          |         |   |          |         |         |   |          |         |         |   |         |         |         |   |          |         |         |   |          |         |         |   |         |         |         |   |         |         |         |   |          |         |         |   |         |         |         |   |          |         |         |                                                                                                                                                          |                                                                                                                                                                                                                                                                                                                                                                                                                                                                                                                                                                                                                                                                                                                                                                                                                                                                                                                                                                                                                                                                                                                                                                                                                                                                                                                                                                                                                                                                                    |          |          |         |          |          |          |         |          |          |          |          |          |          |          |         |          |          |          |         |          |          |          |         |          |          |          |          |          |          |          |         |          |          |          |         |          |          |          |          |          |         |         |                                                                                                                                                         |                                                                                                                                                                                                                                                                                                                                                                                                                                                                                                                                                                                                                                                                                                                                                                                                                                                                                                                                                                                                                                                                                                                                                                                                                                                                                                                                                                                                                                                                                                                                                                                                                                                                                                                                                                                                                                                                                                                                                                                                                                                                                                                                                                                                                                                                                               |   |         |          |          |   |         |          |          |   |         |          |          |   |         |          |          |   |         |          |          |   |         |          |          |   |          |          |          |   |         |          |          |   |         |          |          |   |          |          |          |   |         |         |         |   |          |         |         |   |         |         |         |   |          |         |         |   |          |         |         |   |         |         |         |   |         |          |         |   |          |         |         |   |         |         |         |   |          |         |         |   |          |          |          |   |          |          |          |   |          |          |          |   |          |          |          |   |          |          |          |   |          |          |          |   |          |         |          |   |          |         |          |   |          |         |          |   |          |         |          |    |          |         |         |
| H                                                                                                                                                       | -2.20389                                                                                                                                                                                                                                                                                                                                                                                                                                                                                                                                                                                                                                                                                                                                                                                                                                                                                                                                                                                                                                                                                                                                                                                                                                                                                                                                                                                                                                                                                                                                                                                                                                                                                                                                                                                                                                                                                                                                                                                                                                                                                                                                                                                                                                                                               | -1.72456 | -1.54216 |         |          |   |         |         |          |   |         |         |         |   |         |          |          |   |         |         |          |   |         |         |         |   |          |          |          |   |         |         |          |   |         |         |         |   |          |          |         |   |          |         |         |   |          |         |         |   |         |         |         |   |          |         |         |   |          |         |         |   |         |         |         |   |         |         |         |   |          |         |         |   |         |         |         |   |          |         |         |                                                                                                                                                          |                                                                                                                                                                                                                                                                                                                                                                                                                                                                                                                                                                                                                                                                                                                                                                                                                                                                                                                                                                                                                                                                                                                                                                                                                                                                                                                                                                                                                                                                                    |          |          |         |          |          |          |         |          |          |          |          |          |          |          |         |          |          |          |         |          |          |          |         |          |          |          |          |          |          |          |         |          |          |          |         |          |          |          |          |          |         |         |                                                                                                                                                         |                                                                                                                                                                                                                                                                                                                                                                                                                                                                                                                                                                                                                                                                                                                                                                                                                                                                                                                                                                                                                                                                                                                                                                                                                                                                                                                                                                                                                                                                                                                                                                                                                                                                                                                                                                                                                                                                                                                                                                                                                                                                                                                                                                                                                                                                                               |   |         |          |          |   |         |          |          |   |         |          |          |   |         |          |          |   |         |          |          |   |         |          |          |   |          |          |          |   |         |          |          |   |         |          |          |   |          |          |          |   |         |         |         |   |          |         |         |   |         |         |         |   |          |         |         |   |          |         |         |   |         |         |         |   |         |          |         |   |          |         |         |   |         |         |         |   |          |         |         |   |          |          |          |   |          |          |          |   |          |          |          |   |          |          |          |   |          |          |          |   |          |          |          |   |          |         |          |   |          |         |          |   |          |         |          |   |          |         |          |    |          |         |         |
| H                                                                                                                                                       | -2.01134                                                                                                                                                                                                                                                                                                                                                                                                                                                                                                                                                                                                                                                                                                                                                                                                                                                                                                                                                                                                                                                                                                                                                                                                                                                                                                                                                                                                                                                                                                                                                                                                                                                                                                                                                                                                                                                                                                                                                                                                                                                                                                                                                                                                                                                                               | -2.53416 | -3.10459 |         |          |   |         |         |          |   |         |         |         |   |         |          |          |   |         |         |          |   |         |         |         |   |          |          |          |   |         |         |          |   |         |         |         |   |          |          |         |   |          |         |         |   |          |         |         |   |         |         |         |   |          |         |         |   |          |         |         |   |         |         |         |   |         |         |         |   |          |         |         |   |         |         |         |   |          |         |         |                                                                                                                                                          |                                                                                                                                                                                                                                                                                                                                                                                                                                                                                                                                                                                                                                                                                                                                                                                                                                                                                                                                                                                                                                                                                                                                                                                                                                                                                                                                                                                                                                                                                    |          |          |         |          |          |          |         |          |          |          |          |          |          |          |         |          |          |          |         |          |          |          |         |          |          |          |          |          |          |          |         |          |          |          |         |          |          |          |          |          |         |         |                                                                                                                                                         |                                                                                                                                                                                                                                                                                                                                                                                                                                                                                                                                                                                                                                                                                                                                                                                                                                                                                                                                                                                                                                                                                                                                                                                                                                                                                                                                                                                                                                                                                                                                                                                                                                                                                                                                                                                                                                                                                                                                                                                                                                                                                                                                                                                                                                                                                               |   |         |          |          |   |         |          |          |   |         |          |          |   |         |          |          |   |         |          |          |   |         |          |          |   |          |          |          |   |         |          |          |   |         |          |          |   |          |          |          |   |         |         |         |   |          |         |         |   |         |         |         |   |          |         |         |   |          |         |         |   |         |         |         |   |         |          |         |   |          |         |         |   |         |         |         |   |          |         |         |   |          |          |          |   |          |          |          |   |          |          |          |   |          |          |          |   |          |          |          |   |          |          |          |   |          |         |          |   |          |         |          |   |          |         |          |   |          |         |          |    |          |         |         |
| H                                                                                                                                                       | -1.97935                                                                                                                                                                                                                                                                                                                                                                                                                                                                                                                                                                                                                                                                                                                                                                                                                                                                                                                                                                                                                                                                                                                                                                                                                                                                                                                                                                                                                                                                                                                                                                                                                                                                                                                                                                                                                                                                                                                                                                                                                                                                                                                                                                                                                                                                               | -0.76219 | -3.00594 |         |          |   |         |         |          |   |         |         |         |   |         |          |          |   |         |         |          |   |         |         |         |   |          |          |          |   |         |         |          |   |         |         |         |   |          |          |         |   |          |         |         |   |          |         |         |   |         |         |         |   |          |         |         |   |          |         |         |   |         |         |         |   |         |         |         |   |          |         |         |   |         |         |         |   |          |         |         |                                                                                                                                                          |                                                                                                                                                                                                                                                                                                                                                                                                                                                                                                                                                                                                                                                                                                                                                                                                                                                                                                                                                                                                                                                                                                                                                                                                                                                                                                                                                                                                                                                                                    |          |          |         |          |          |          |         |          |          |          |          |          |          |          |         |          |          |          |         |          |          |          |         |          |          |          |          |          |          |          |         |          |          |          |         |          |          |          |          |          |         |         |                                                                                                                                                         |                                                                                                                                                                                                                                                                                                                                                                                                                                                                                                                                                                                                                                                                                                                                                                                                                                                                                                                                                                                                                                                                                                                                                                                                                                                                                                                                                                                                                                                                                                                                                                                                                                                                                                                                                                                                                                                                                                                                                                                                                                                                                                                                                                                                                                                                                               |   |         |          |          |   |         |          |          |   |         |          |          |   |         |          |          |   |         |          |          |   |         |          |          |   |          |          |          |   |         |          |          |   |         |          |          |   |          |          |          |   |         |         |         |   |          |         |         |   |         |         |         |   |          |         |         |   |          |         |         |   |         |         |         |   |         |          |         |   |          |         |         |   |         |         |         |   |          |         |         |   |          |          |          |   |          |          |          |   |          |          |          |   |          |          |          |   |          |          |          |   |          |          |          |   |          |         |          |   |          |         |          |   |          |         |          |   |          |         |          |    |          |         |         |
| Br                                                                                                                                                      | -2.96845                                                                                                                                                                                                                                                                                                                                                                                                                                                                                                                                                                                                                                                                                                                                                                                                                                                                                                                                                                                                                                                                                                                                                                                                                                                                                                                                                                                                                                                                                                                                                                                                                                                                                                                                                                                                                                                                                                                                                                                                                                                                                                                                                                                                                                                                               | 0.81870  | 1.14114  |         |          |   |         |         |          |   |         |         |         |   |         |          |          |   |         |         |          |   |         |         |         |   |          |          |          |   |         |         |          |   |         |         |         |   |          |          |         |   |          |         |         |   |          |         |         |   |         |         |         |   |          |         |         |   |          |         |         |   |         |         |         |   |         |         |         |   |          |         |         |   |         |         |         |   |          |         |         |                                                                                                                                                          |                                                                                                                                                                                                                                                                                                                                                                                                                                                                                                                                                                                                                                                                                                                                                                                                                                                                                                                                                                                                                                                                                                                                                                                                                                                                                                                                                                                                                                                                                    |          |          |         |          |          |          |         |          |          |          |          |          |          |          |         |          |          |          |         |          |          |          |         |          |          |          |          |          |          |          |         |          |          |          |         |          |          |          |          |          |         |         |                                                                                                                                                         |                                                                                                                                                                                                                                                                                                                                                                                                                                                                                                                                                                                                                                                                                                                                                                                                                                                                                                                                                                                                                                                                                                                                                                                                                                                                                                                                                                                                                                                                                                                                                                                                                                                                                                                                                                                                                                                                                                                                                                                                                                                                                                                                                                                                                                                                                               |   |         |          |          |   |         |          |          |   |         |          |          |   |         |          |          |   |         |          |          |   |         |          |          |   |          |          |          |   |         |          |          |   |         |          |          |   |          |          |          |   |         |         |         |   |          |         |         |   |         |         |         |   |          |         |         |   |          |         |         |   |         |         |         |   |         |          |         |   |          |         |         |   |         |         |         |   |          |         |         |   |          |          |          |   |          |          |          |   |          |          |          |   |          |          |          |   |          |          |          |   |          |          |          |   |          |         |          |   |          |         |          |   |          |         |          |   |          |         |          |    |          |         |         |
| H                                                                                                                                                       | 2.13020                                                                                                                                                                                                                                                                                                                                                                                                                                                                                                                                                                                                                                                                                                                                                                                                                                                                                                                                                                                                                                                                                                                                                                                                                                                                                                                                                                                                                                                                                                                                                                                                                                                                                                                                                                                                                                                                                                                                                                                                                                                                                                                                                                                                                                                                                | -0.00327 | -4.16592 |         |          |   |         |         |          |   |         |         |         |   |         |          |          |   |         |         |          |   |         |         |         |   |          |          |          |   |         |         |          |   |         |         |         |   |          |          |         |   |          |         |         |   |          |         |         |   |         |         |         |   |          |         |         |   |          |         |         |   |         |         |         |   |         |         |         |   |          |         |         |   |         |         |         |   |          |         |         |                                                                                                                                                          |                                                                                                                                                                                                                                                                                                                                                                                                                                                                                                                                                                                                                                                                                                                                                                                                                                                                                                                                                                                                                                                                                                                                                                                                                                                                                                                                                                                                                                                                                    |          |          |         |          |          |          |         |          |          |          |          |          |          |          |         |          |          |          |         |          |          |          |         |          |          |          |          |          |          |          |         |          |          |          |         |          |          |          |          |          |         |         |                                                                                                                                                         |                                                                                                                                                                                                                                                                                                                                                                                                                                                                                                                                                                                                                                                                                                                                                                                                                                                                                                                                                                                                                                                                                                                                                                                                                                                                                                                                                                                                                                                                                                                                                                                                                                                                                                                                                                                                                                                                                                                                                                                                                                                                                                                                                                                                                                                                                               |   |         |          |          |   |         |          |          |   |         |          |          |   |         |          |          |   |         |          |          |   |         |          |          |   |          |          |          |   |         |          |          |   |         |          |          |   |          |          |          |   |         |         |         |   |          |         |         |   |         |         |         |   |          |         |         |   |          |         |         |   |         |         |         |   |         |          |         |   |          |         |         |   |         |         |         |   |          |         |         |   |          |          |          |   |          |          |          |   |          |          |          |   |          |          |          |   |          |          |          |   |          |          |          |   |          |         |          |   |          |         |          |   |          |         |          |   |          |         |          |    |          |         |         |
| C                                                                                                                                                       | 1.91486                                                                                                                                                                                                                                                                                                                                                                                                                                                                                                                                                                                                                                                                                                                                                                                                                                                                                                                                                                                                                                                                                                                                                                                                                                                                                                                                                                                                                                                                                                                                                                                                                                                                                                                                                                                                                                                                                                                                                                                                                                                                                                                                                                                                                                                                                | -0.00247 | -3.10430 |         |          |   |         |         |          |   |         |         |         |   |         |          |          |   |         |         |          |   |         |         |         |   |          |          |          |   |         |         |          |   |         |         |         |   |          |          |         |   |          |         |         |   |          |         |         |   |         |         |         |   |          |         |         |   |          |         |         |   |         |         |         |   |         |         |         |   |          |         |         |   |         |         |         |   |          |         |         |                                                                                                                                                          |                                                                                                                                                                                                                                                                                                                                                                                                                                                                                                                                                                                                                                                                                                                                                                                                                                                                                                                                                                                                                                                                                                                                                                                                                                                                                                                                                                                                                                                                                    |          |          |         |          |          |          |         |          |          |          |          |          |          |          |         |          |          |          |         |          |          |          |         |          |          |          |          |          |          |          |         |          |          |          |         |          |          |          |          |          |         |         |                                                                                                                                                         |                                                                                                                                                                                                                                                                                                                                                                                                                                                                                                                                                                                                                                                                                                                                                                                                                                                                                                                                                                                                                                                                                                                                                                                                                                                                                                                                                                                                                                                                                                                                                                                                                                                                                                                                                                                                                                                                                                                                                                                                                                                                                                                                                                                                                                                                                               |   |         |          |          |   |         |          |          |   |         |          |          |   |         |          |          |   |         |          |          |   |         |          |          |   |          |          |          |   |         |          |          |   |         |          |          |   |          |          |          |   |         |         |         |   |          |         |         |   |         |         |         |   |          |         |         |   |          |         |         |   |         |         |         |   |         |          |         |   |          |         |         |   |         |         |         |   |          |         |         |   |          |          |          |   |          |          |          |   |          |          |          |   |          |          |          |   |          |          |          |   |          |          |          |   |          |         |          |   |          |         |          |   |          |         |          |   |          |         |          |    |          |         |         |
| C                                                                                                                                                       | 1.35324                                                                                                                                                                                                                                                                                                                                                                                                                                                                                                                                                                                                                                                                                                                                                                                                                                                                                                                                                                                                                                                                                                                                                                                                                                                                                                                                                                                                                                                                                                                                                                                                                                                                                                                                                                                                                                                                                                                                                                                                                                                                                                                                                                                                                                                                                | -0.00050 | -0.32101 |         |          |   |         |         |          |   |         |         |         |   |         |          |          |   |         |         |          |   |         |         |         |   |          |          |          |   |         |         |          |   |         |         |         |   |          |          |         |   |          |         |         |   |          |         |         |   |         |         |         |   |          |         |         |   |          |         |         |   |         |         |         |   |         |         |         |   |          |         |         |   |         |         |         |   |          |         |         |                                                                                                                                                          |                                                                                                                                                                                                                                                                                                                                                                                                                                                                                                                                                                                                                                                                                                                                                                                                                                                                                                                                                                                                                                                                                                                                                                                                                                                                                                                                                                                                                                                                                    |          |          |         |          |          |          |         |          |          |          |          |          |          |          |         |          |          |          |         |          |          |          |         |          |          |          |          |          |          |          |         |          |          |          |         |          |          |          |          |          |         |         |                                                                                                                                                         |                                                                                                                                                                                                                                                                                                                                                                                                                                                                                                                                                                                                                                                                                                                                                                                                                                                                                                                                                                                                                                                                                                                                                                                                                                                                                                                                                                                                                                                                                                                                                                                                                                                                                                                                                                                                                                                                                                                                                                                                                                                                                                                                                                                                                                                                                               |   |         |          |          |   |         |          |          |   |         |          |          |   |         |          |          |   |         |          |          |   |         |          |          |   |          |          |          |   |         |          |          |   |         |          |          |   |          |          |          |   |         |         |         |   |          |         |         |   |         |         |         |   |          |         |         |   |          |         |         |   |         |         |         |   |         |          |         |   |          |         |         |   |         |         |         |   |          |         |         |   |          |          |          |   |          |          |          |   |          |          |          |   |          |          |          |   |          |          |          |   |          |          |          |   |          |         |          |   |          |         |          |   |          |         |          |   |          |         |          |    |          |         |         |
| C                                                                                                                                                       | 0.59911                                                                                                                                                                                                                                                                                                                                                                                                                                                                                                                                                                                                                                                                                                                                                                                                                                                                                                                                                                                                                                                                                                                                                                                                                                                                                                                                                                                                                                                                                                                                                                                                                                                                                                                                                                                                                                                                                                                                                                                                                                                                                                                                                                                                                                                                                | -0.00166 | -2.66282 |         |          |   |         |         |          |   |         |         |         |   |         |          |          |   |         |         |          |   |         |         |         |   |          |          |          |   |         |         |          |   |         |         |         |   |          |          |         |   |          |         |         |   |          |         |         |   |         |         |         |   |          |         |         |   |          |         |         |   |         |         |         |   |         |         |         |   |          |         |         |   |         |         |         |   |          |         |         |                                                                                                                                                          |                                                                                                                                                                                                                                                                                                                                                                                                                                                                                                                                                                                                                                                                                                                                                                                                                                                                                                                                                                                                                                                                                                                                                                                                                                                                                                                                                                                                                                                                                    |          |          |         |          |          |          |         |          |          |          |          |          |          |          |         |          |          |          |         |          |          |          |         |          |          |          |          |          |          |          |         |          |          |          |         |          |          |          |          |          |         |         |                                                                                                                                                         |                                                                                                                                                                                                                                                                                                                                                                                                                                                                                                                                                                                                                                                                                                                                                                                                                                                                                                                                                                                                                                                                                                                                                                                                                                                                                                                                                                                                                                                                                                                                                                                                                                                                                                                                                                                                                                                                                                                                                                                                                                                                                                                                                                                                                                                                                               |   |         |          |          |   |         |          |          |   |         |          |          |   |         |          |          |   |         |          |          |   |         |          |          |   |          |          |          |   |         |          |          |   |         |          |          |   |          |          |          |   |         |         |         |   |          |         |         |   |         |         |         |   |          |         |         |   |          |         |         |   |         |         |         |   |         |          |         |   |          |         |         |   |         |         |         |   |          |         |         |   |          |          |          |   |          |          |          |   |          |          |          |   |          |          |          |   |          |          |          |   |          |          |          |   |          |         |          |   |          |         |          |   |          |         |          |   |          |         |          |    |          |         |         |
| C                                                                                                                                                       | 2.94707                                                                                                                                                                                                                                                                                                                                                                                                                                                                                                                                                                                                                                                                                                                                                                                                                                                                                                                                                                                                                                                                                                                                                                                                                                                                                                                                                                                                                                                                                                                                                                                                                                                                                                                                                                                                                                                                                                                                                                                                                                                                                                                                                                                                                                                                                | -0.00223 | -2.17184 |         |          |   |         |         |          |   |         |         |         |   |         |          |          |   |         |         |          |   |         |         |         |   |          |          |          |   |         |         |          |   |         |         |         |   |          |          |         |   |          |         |         |   |          |         |         |   |         |         |         |   |          |         |         |   |          |         |         |   |         |         |         |   |         |         |         |   |          |         |         |   |         |         |         |   |          |         |         |                                                                                                                                                          |                                                                                                                                                                                                                                                                                                                                                                                                                                                                                                                                                                                                                                                                                                                                                                                                                                                                                                                                                                                                                                                                                                                                                                                                                                                                                                                                                                                                                                                                                    |          |          |         |          |          |          |         |          |          |          |          |          |          |          |         |          |          |          |         |          |          |          |         |          |          |          |          |          |          |          |         |          |          |          |         |          |          |          |          |          |         |         |                                                                                                                                                         |                                                                                                                                                                                                                                                                                                                                                                                                                                                                                                                                                                                                                                                                                                                                                                                                                                                                                                                                                                                                                                                                                                                                                                                                                                                                                                                                                                                                                                                                                                                                                                                                                                                                                                                                                                                                                                                                                                                                                                                                                                                                                                                                                                                                                                                                                               |   |         |          |          |   |         |          |          |   |         |          |          |   |         |          |          |   |         |          |          |   |         |          |          |   |          |          |          |   |         |          |          |   |         |          |          |   |          |          |          |   |         |         |         |   |          |         |         |   |         |         |         |   |          |         |         |   |          |         |         |   |         |         |         |   |         |          |         |   |          |         |         |   |         |         |         |   |          |         |         |   |          |          |          |   |          |          |          |   |          |          |          |   |          |          |          |   |          |          |          |   |          |          |          |   |          |         |          |   |          |         |          |   |          |         |          |   |          |         |          |    |          |         |         |
| C                                                                                                                                                       | 2.67556                                                                                                                                                                                                                                                                                                                                                                                                                                                                                                                                                                                                                                                                                                                                                                                                                                                                                                                                                                                                                                                                                                                                                                                                                                                                                                                                                                                                                                                                                                                                                                                                                                                                                                                                                                                                                                                                                                                                                                                                                                                                                                                                                                                                                                                                                | -0.00123 | -0.81413 |         |          |   |         |         |          |   |         |         |         |   |         |          |          |   |         |         |          |   |         |         |         |   |          |          |          |   |         |         |          |   |         |         |         |   |          |          |         |   |          |         |         |   |          |         |         |   |         |         |         |   |          |         |         |   |          |         |         |   |         |         |         |   |         |         |         |   |          |         |         |   |         |         |         |   |          |         |         |                                                                                                                                                          |                                                                                                                                                                                                                                                                                                                                                                                                                                                                                                                                                                                                                                                                                                                                                                                                                                                                                                                                                                                                                                                                                                                                                                                                                                                                                                                                                                                                                                                                                    |          |          |         |          |          |          |         |          |          |          |          |          |          |          |         |          |          |          |         |          |          |          |         |          |          |          |          |          |          |          |         |          |          |          |         |          |          |          |          |          |         |         |                                                                                                                                                         |                                                                                                                                                                                                                                                                                                                                                                                                                                                                                                                                                                                                                                                                                                                                                                                                                                                                                                                                                                                                                                                                                                                                                                                                                                                                                                                                                                                                                                                                                                                                                                                                                                                                                                                                                                                                                                                                                                                                                                                                                                                                                                                                                                                                                                                                                               |   |         |          |          |   |         |          |          |   |         |          |          |   |         |          |          |   |         |          |          |   |         |          |          |   |          |          |          |   |         |          |          |   |         |          |          |   |          |          |          |   |         |         |         |   |          |         |         |   |         |         |         |   |          |         |         |   |          |         |         |   |         |         |         |   |         |          |         |   |          |         |         |   |         |         |         |   |          |         |         |   |          |          |          |   |          |          |          |   |          |          |          |   |          |          |          |   |          |          |          |   |          |          |          |   |          |         |          |   |          |         |          |   |          |         |          |   |          |         |          |    |          |         |         |
| C                                                                                                                                                       | 0.34429                                                                                                                                                                                                                                                                                                                                                                                                                                                                                                                                                                                                                                                                                                                                                                                                                                                                                                                                                                                                                                                                                                                                                                                                                                                                                                                                                                                                                                                                                                                                                                                                                                                                                                                                                                                                                                                                                                                                                                                                                                                                                                                                                                                                                                                                                | -0.00071 | -1.29063 |         |          |   |         |         |          |   |         |         |         |   |         |          |          |   |         |         |          |   |         |         |         |   |          |          |          |   |         |         |          |   |         |         |         |   |          |          |         |   |          |         |         |   |          |         |         |   |         |         |         |   |          |         |         |   |          |         |         |   |         |         |         |   |         |         |         |   |          |         |         |   |         |         |         |   |          |         |         |                                                                                                                                                          |                                                                                                                                                                                                                                                                                                                                                                                                                                                                                                                                                                                                                                                                                                                                                                                                                                                                                                                                                                                                                                                                                                                                                                                                                                                                                                                                                                                                                                                                                    |          |          |         |          |          |          |         |          |          |          |          |          |          |          |         |          |          |          |         |          |          |          |         |          |          |          |          |          |          |          |         |          |          |          |         |          |          |          |          |          |         |         |                                                                                                                                                         |                                                                                                                                                                                                                                                                                                                                                                                                                                                                                                                                                                                                                                                                                                                                                                                                                                                                                                                                                                                                                                                                                                                                                                                                                                                                                                                                                                                                                                                                                                                                                                                                                                                                                                                                                                                                                                                                                                                                                                                                                                                                                                                                                                                                                                                                                               |   |         |          |          |   |         |          |          |   |         |          |          |   |         |          |          |   |         |          |          |   |         |          |          |   |          |          |          |   |         |          |          |   |         |          |          |   |          |          |          |   |         |         |         |   |          |         |         |   |         |         |         |   |          |         |         |   |          |         |         |   |         |         |         |   |         |          |         |   |          |         |         |   |         |         |         |   |          |         |         |   |          |          |          |   |          |          |          |   |          |          |          |   |          |          |          |   |          |          |          |   |          |          |          |   |          |         |          |   |          |         |          |   |          |         |          |   |          |         |          |    |          |         |         |
| H                                                                                                                                                       | 3.97771                                                                                                                                                                                                                                                                                                                                                                                                                                                                                                                                                                                                                                                                                                                                                                                                                                                                                                                                                                                                                                                                                                                                                                                                                                                                                                                                                                                                                                                                                                                                                                                                                                                                                                                                                                                                                                                                                                                                                                                                                                                                                                                                                                                                                                                                                | -0.00282 | -2.50282 |         |          |   |         |         |          |   |         |         |         |   |         |          |          |   |         |         |          |   |         |         |         |   |          |          |          |   |         |         |          |   |         |         |         |   |          |          |         |   |          |         |         |   |          |         |         |   |         |         |         |   |          |         |         |   |          |         |         |   |         |         |         |   |         |         |         |   |          |         |         |   |         |         |         |   |          |         |         |                                                                                                                                                          |                                                                                                                                                                                                                                                                                                                                                                                                                                                                                                                                                                                                                                                                                                                                                                                                                                                                                                                                                                                                                                                                                                                                                                                                                                                                                                                                                                                                                                                                                    |          |          |         |          |          |          |         |          |          |          |          |          |          |          |         |          |          |          |         |          |          |          |         |          |          |          |          |          |          |          |         |          |          |          |         |          |          |          |          |          |         |         |                                                                                                                                                         |                                                                                                                                                                                                                                                                                                                                                                                                                                                                                                                                                                                                                                                                                                                                                                                                                                                                                                                                                                                                                                                                                                                                                                                                                                                                                                                                                                                                                                                                                                                                                                                                                                                                                                                                                                                                                                                                                                                                                                                                                                                                                                                                                                                                                                                                                               |   |         |          |          |   |         |          |          |   |         |          |          |   |         |          |          |   |         |          |          |   |         |          |          |   |          |          |          |   |         |          |          |   |         |          |          |   |          |          |          |   |         |         |         |   |          |         |         |   |         |         |         |   |          |         |         |   |          |         |         |   |         |         |         |   |         |          |         |   |          |         |         |   |         |         |         |   |          |         |         |   |          |          |          |   |          |          |          |   |          |          |          |   |          |          |          |   |          |          |          |   |          |          |          |   |          |         |          |   |          |         |          |   |          |         |          |   |          |         |          |    |          |         |         |
| H                                                                                                                                                       | 3.52504                                                                                                                                                                                                                                                                                                                                                                                                                                                                                                                                                                                                                                                                                                                                                                                                                                                                                                                                                                                                                                                                                                                                                                                                                                                                                                                                                                                                                                                                                                                                                                                                                                                                                                                                                                                                                                                                                                                                                                                                                                                                                                                                                                                                                                                                                | -0.00106 | -0.15210 |         |          |   |         |         |          |   |         |         |         |   |         |          |          |   |         |         |          |   |         |         |         |   |          |          |          |   |         |         |          |   |         |         |         |   |          |          |         |   |          |         |         |   |          |         |         |   |         |         |         |   |          |         |         |   |          |         |         |   |         |         |         |   |         |         |         |   |          |         |         |   |         |         |         |   |          |         |         |                                                                                                                                                          |                                                                                                                                                                                                                                                                                                                                                                                                                                                                                                                                                                                                                                                                                                                                                                                                                                                                                                                                                                                                                                                                                                                                                                                                                                                                                                                                                                                                                                                                                    |          |          |         |          |          |          |         |          |          |          |          |          |          |          |         |          |          |          |         |          |          |          |         |          |          |          |          |          |          |          |         |          |          |          |         |          |          |          |          |          |         |         |                                                                                                                                                         |                                                                                                                                                                                                                                                                                                                                                                                                                                                                                                                                                                                                                                                                                                                                                                                                                                                                                                                                                                                                                                                                                                                                                                                                                                                                                                                                                                                                                                                                                                                                                                                                                                                                                                                                                                                                                                                                                                                                                                                                                                                                                                                                                                                                                                                                                               |   |         |          |          |   |         |          |          |   |         |          |          |   |         |          |          |   |         |          |          |   |         |          |          |   |          |          |          |   |         |          |          |   |         |          |          |   |          |          |          |   |         |         |         |   |          |         |         |   |         |         |         |   |          |         |         |   |          |         |         |   |         |         |         |   |         |          |         |   |          |         |         |   |         |         |         |   |          |         |         |   |          |          |          |   |          |          |          |   |          |          |          |   |          |          |          |   |          |          |          |   |          |          |          |   |          |         |          |   |          |         |          |   |          |         |          |   |          |         |          |    |          |         |         |
| H                                                                                                                                                       | -0.68469                                                                                                                                                                                                                                                                                                                                                                                                                                                                                                                                                                                                                                                                                                                                                                                                                                                                                                                                                                                                                                                                                                                                                                                                                                                                                                                                                                                                                                                                                                                                                                                                                                                                                                                                                                                                                                                                                                                                                                                                                                                                                                                                                                                                                                                                               | -0.00008 | -0.99204 |         |          |   |         |         |          |   |         |         |         |   |         |          |          |   |         |         |          |   |         |         |         |   |          |          |          |   |         |         |          |   |         |         |         |   |          |          |         |   |          |         |         |   |          |         |         |   |         |         |         |   |          |         |         |   |          |         |         |   |         |         |         |   |         |         |         |   |          |         |         |   |         |         |         |   |          |         |         |                                                                                                                                                          |                                                                                                                                                                                                                                                                                                                                                                                                                                                                                                                                                                                                                                                                                                                                                                                                                                                                                                                                                                                                                                                                                                                                                                                                                                                                                                                                                                                                                                                                                    |          |          |         |          |          |          |         |          |          |          |          |          |          |          |         |          |          |          |         |          |          |          |         |          |          |          |          |          |          |          |         |          |          |          |         |          |          |          |          |          |         |         |                                                                                                                                                         |                                                                                                                                                                                                                                                                                                                                                                                                                                                                                                                                                                                                                                                                                                                                                                                                                                                                                                                                                                                                                                                                                                                                                                                                                                                                                                                                                                                                                                                                                                                                                                                                                                                                                                                                                                                                                                                                                                                                                                                                                                                                                                                                                                                                                                                                                               |   |         |          |          |   |         |          |          |   |         |          |          |   |         |          |          |   |         |          |          |   |         |          |          |   |          |          |          |   |         |          |          |   |         |          |          |   |          |          |          |   |         |         |         |   |          |         |         |   |         |         |         |   |          |         |         |   |          |         |         |   |         |         |         |   |         |          |         |   |          |         |         |   |         |         |         |   |          |         |         |   |          |          |          |   |          |          |          |   |          |          |          |   |          |          |          |   |          |          |          |   |          |          |          |   |          |         |          |   |          |         |          |   |          |         |          |   |          |         |          |    |          |         |         |
| C                                                                                                                                                       | 1.09058                                                                                                                                                                                                                                                                                                                                                                                                                                                                                                                                                                                                                                                                                                                                                                                                                                                                                                                                                                                                                                                                                                                                                                                                                                                                                                                                                                                                                                                                                                                                                                                                                                                                                                                                                                                                                                                                                                                                                                                                                                                                                                                                                                                                                                                                                | 0.00030  | 1.15872  |         |          |   |         |         |          |   |         |         |         |   |         |          |          |   |         |         |          |   |         |         |         |   |          |          |          |   |         |         |          |   |         |         |         |   |          |          |         |   |          |         |         |   |          |         |         |   |         |         |         |   |          |         |         |   |          |         |         |   |         |         |         |   |         |         |         |   |          |         |         |   |         |         |         |   |          |         |         |                                                                                                                                                          |                                                                                                                                                                                                                                                                                                                                                                                                                                                                                                                                                                                                                                                                                                                                                                                                                                                                                                                                                                                                                                                                                                                                                                                                                                                                                                                                                                                                                                                                                    |          |          |         |          |          |          |         |          |          |          |          |          |          |          |         |          |          |          |         |          |          |          |         |          |          |          |          |          |          |          |         |          |          |          |         |          |          |          |          |          |         |         |                                                                                                                                                         |                                                                                                                                                                                                                                                                                                                                                                                                                                                                                                                                                                                                                                                                                                                                                                                                                                                                                                                                                                                                                                                                                                                                                                                                                                                                                                                                                                                                                                                                                                                                                                                                                                                                                                                                                                                                                                                                                                                                                                                                                                                                                                                                                                                                                                                                                               |   |         |          |          |   |         |          |          |   |         |          |          |   |         |          |          |   |         |          |          |   |         |          |          |   |          |          |          |   |         |          |          |   |         |          |          |   |          |          |          |   |         |         |         |   |          |         |         |   |         |         |         |   |          |         |         |   |          |         |         |   |         |         |         |   |         |          |         |   |          |         |         |   |         |         |         |   |          |         |         |   |          |          |          |   |          |          |          |   |          |          |          |   |          |          |          |   |          |          |          |   |          |          |          |   |          |         |          |   |          |         |          |   |          |         |          |   |          |         |          |    |          |         |         |
| C                                                                                                                                                       | 0.88549                                                                                                                                                                                                                                                                                                                                                                                                                                                                                                                                                                                                                                                                                                                                                                                                                                                                                                                                                                                                                                                                                                                                                                                                                                                                                                                                                                                                                                                                                                                                                                                                                                                                                                                                                                                                                                                                                                                                                                                                                                                                                                                                                                                                                                                                                | 0.00126  | 4.02413  |         |          |   |         |         |          |   |         |         |         |   |         |          |          |   |         |         |          |   |         |         |         |   |          |          |          |   |         |         |          |   |         |         |         |   |          |          |         |   |          |         |         |   |          |         |         |   |         |         |         |   |          |         |         |   |          |         |         |   |         |         |         |   |         |         |         |   |          |         |         |   |         |         |         |   |          |         |         |                                                                                                                                                          |                                                                                                                                                                                                                                                                                                                                                                                                                                                                                                                                                                                                                                                                                                                                                                                                                                                                                                                                                                                                                                                                                                                                                                                                                                                                                                                                                                                                                                                                                    |          |          |         |          |          |          |         |          |          |          |          |          |          |          |         |          |          |          |         |          |          |          |         |          |          |          |          |          |          |          |         |          |          |          |         |          |          |          |          |          |         |         |                                                                                                                                                         |                                                                                                                                                                                                                                                                                                                                                                                                                                                                                                                                                                                                                                                                                                                                                                                                                                                                                                                                                                                                                                                                                                                                                                                                                                                                                                                                                                                                                                                                                                                                                                                                                                                                                                                                                                                                                                                                                                                                                                                                                                                                                                                                                                                                                                                                                               |   |         |          |          |   |         |          |          |   |         |          |          |   |         |          |          |   |         |          |          |   |         |          |          |   |          |          |          |   |         |          |          |   |         |          |          |   |          |          |          |   |         |         |         |   |          |         |         |   |         |         |         |   |          |         |         |   |          |         |         |   |         |         |         |   |         |          |         |   |          |         |         |   |         |         |         |   |          |         |         |   |          |          |          |   |          |          |          |   |          |          |          |   |          |          |          |   |          |          |          |   |          |          |          |   |          |         |          |   |          |         |          |   |          |         |          |   |          |         |          |    |          |         |         |
| C                                                                                                                                                       | 2.20705                                                                                                                                                                                                                                                                                                                                                                                                                                                                                                                                                                                                                                                                                                                                                                                                                                                                                                                                                                                                                                                                                                                                                                                                                                                                                                                                                                                                                                                                                                                                                                                                                                                                                                                                                                                                                                                                                                                                                                                                                                                                                                                                                                                                                                                                                | 0.00016  | 2.02635  |         |          |   |         |         |          |   |         |         |         |   |         |          |          |   |         |         |          |   |         |         |         |   |          |          |          |   |         |         |          |   |         |         |         |   |          |          |         |   |          |         |         |   |          |         |         |   |         |         |         |   |          |         |         |   |          |         |         |   |         |         |         |   |         |         |         |   |          |         |         |   |         |         |         |   |          |         |         |                                                                                                                                                          |                                                                                                                                                                                                                                                                                                                                                                                                                                                                                                                                                                                                                                                                                                                                                                                                                                                                                                                                                                                                                                                                                                                                                                                                                                                                                                                                                                                                                                                                                    |          |          |         |          |          |          |         |          |          |          |          |          |          |          |         |          |          |          |         |          |          |          |         |          |          |          |          |          |          |          |         |          |          |          |         |          |          |          |          |          |         |         |                                                                                                                                                         |                                                                                                                                                                                                                                                                                                                                                                                                                                                                                                                                                                                                                                                                                                                                                                                                                                                                                                                                                                                                                                                                                                                                                                                                                                                                                                                                                                                                                                                                                                                                                                                                                                                                                                                                                                                                                                                                                                                                                                                                                                                                                                                                                                                                                                                                                               |   |         |          |          |   |         |          |          |   |         |          |          |   |         |          |          |   |         |          |          |   |         |          |          |   |          |          |          |   |         |          |          |   |         |          |          |   |          |          |          |   |         |         |         |   |          |         |         |   |         |         |         |   |          |         |         |   |          |         |         |   |         |         |         |   |         |          |         |   |          |         |         |   |         |         |         |   |          |         |         |   |          |          |          |   |          |          |          |   |          |          |          |   |          |          |          |   |          |          |          |   |          |          |          |   |          |         |          |   |          |         |          |   |          |         |          |   |          |         |          |    |          |         |         |
| C                                                                                                                                                       | -0.15343                                                                                                                                                                                                                                                                                                                                                                                                                                                                                                                                                                                                                                                                                                                                                                                                                                                                                                                                                                                                                                                                                                                                                                                                                                                                                                                                                                                                                                                                                                                                                                                                                                                                                                                                                                                                                                                                                                                                                                                                                                                                                                                                                                                                                                                                               | 0.00112  | 1.83447  |         |          |   |         |         |          |   |         |         |         |   |         |          |          |   |         |         |          |   |         |         |         |   |          |          |          |   |         |         |          |   |         |         |         |   |          |          |         |   |          |         |         |   |          |         |         |   |         |         |         |   |          |         |         |   |          |         |         |   |         |         |         |   |         |         |         |   |          |         |         |   |         |         |         |   |          |         |         |                                                                                                                                                          |                                                                                                                                                                                                                                                                                                                                                                                                                                                                                                                                                                                                                                                                                                                                                                                                                                                                                                                                                                                                                                                                                                                                                                                                                                                                                                                                                                                                                                                                                    |          |          |         |          |          |          |         |          |          |          |          |          |          |          |         |          |          |          |         |          |          |          |         |          |          |          |          |          |          |          |         |          |          |          |         |          |          |          |          |          |         |         |                                                                                                                                                         |                                                                                                                                                                                                                                                                                                                                                                                                                                                                                                                                                                                                                                                                                                                                                                                                                                                                                                                                                                                                                                                                                                                                                                                                                                                                                                                                                                                                                                                                                                                                                                                                                                                                                                                                                                                                                                                                                                                                                                                                                                                                                                                                                                                                                                                                                               |   |         |          |          |   |         |          |          |   |         |          |          |   |         |          |          |   |         |          |          |   |         |          |          |   |          |          |          |   |         |          |          |   |         |          |          |   |          |          |          |   |         |         |         |   |          |         |         |   |         |         |         |   |          |         |         |   |          |         |         |   |         |         |         |   |         |          |         |   |          |         |         |   |         |         |         |   |          |         |         |   |          |          |          |   |          |          |          |   |          |          |          |   |          |          |          |   |          |          |          |   |          |          |          |   |          |         |          |   |          |         |          |   |          |         |          |   |          |         |          |    |          |         |         |
| C                                                                                                                                                       | -0.24536                                                                                                                                                                                                                                                                                                                                                                                                                                                                                                                                                                                                                                                                                                                                                                                                                                                                                                                                                                                                                                                                                                                                                                                                                                                                                                                                                                                                                                                                                                                                                                                                                                                                                                                                                                                                                                                                                                                                                                                                                                                                                                                                                                                                                                                                               | 0.00151  | 3.22792  |         |          |   |         |         |          |   |         |         |         |   |         |          |          |   |         |         |          |   |         |         |         |   |          |          |          |   |         |         |          |   |         |         |         |   |          |          |         |   |          |         |         |   |          |         |         |   |         |         |         |   |          |         |         |   |          |         |         |   |         |         |         |   |         |         |         |   |          |         |         |   |         |         |         |   |          |         |         |                                                                                                                                                          |                                                                                                                                                                                                                                                                                                                                                                                                                                                                                                                                                                                                                                                                                                                                                                                                                                                                                                                                                                                                                                                                                                                                                                                                                                                                                                                                                                                                                                                                                    |          |          |         |          |          |          |         |          |          |          |          |          |          |          |         |          |          |          |         |          |          |          |         |          |          |          |          |          |          |          |         |          |          |          |         |          |          |          |          |          |         |         |                                                                                                                                                         |                                                                                                                                                                                                                                                                                                                                                                                                                                                                                                                                                                                                                                                                                                                                                                                                                                                                                                                                                                                                                                                                                                                                                                                                                                                                                                                                                                                                                                                                                                                                                                                                                                                                                                                                                                                                                                                                                                                                                                                                                                                                                                                                                                                                                                                                                               |   |         |          |          |   |         |          |          |   |         |          |          |   |         |          |          |   |         |          |          |   |         |          |          |   |          |          |          |   |         |          |          |   |         |          |          |   |          |          |          |   |         |         |         |   |          |         |         |   |         |         |         |   |          |         |         |   |          |         |         |   |         |         |         |   |         |          |         |   |          |         |         |   |         |         |         |   |          |         |         |   |          |          |          |   |          |          |          |   |          |          |          |   |          |          |          |   |          |          |          |   |          |          |          |   |          |         |          |   |          |         |          |   |          |         |          |   |          |         |          |    |          |         |         |
| C                                                                                                                                                       | 2.12751                                                                                                                                                                                                                                                                                                                                                                                                                                                                                                                                                                                                                                                                                                                                                                                                                                                                                                                                                                                                                                                                                                                                                                                                                                                                                                                                                                                                                                                                                                                                                                                                                                                                                                                                                                                                                                                                                                                                                                                                                                                                                                                                                                                                                                                                                | 0.00065  | 3.40599  |         |          |   |         |         |          |   |         |         |         |   |         |          |          |   |         |         |          |   |         |         |         |   |          |          |          |   |         |         |          |   |         |         |         |   |          |          |         |   |          |         |         |   |          |         |         |   |         |         |         |   |          |         |         |   |          |         |         |   |         |         |         |   |         |         |         |   |          |         |         |   |         |         |         |   |          |         |         |                                                                                                                                                          |                                                                                                                                                                                                                                                                                                                                                                                                                                                                                                                                                                                                                                                                                                                                                                                                                                                                                                                                                                                                                                                                                                                                                                                                                                                                                                                                                                                                                                                                                    |          |          |         |          |          |          |         |          |          |          |          |          |          |          |         |          |          |          |         |          |          |          |         |          |          |          |          |          |          |          |         |          |          |          |         |          |          |          |          |          |         |         |                                                                                                                                                         |                                                                                                                                                                                                                                                                                                                                                                                                                                                                                                                                                                                                                                                                                                                                                                                                                                                                                                                                                                                                                                                                                                                                                                                                                                                                                                                                                                                                                                                                                                                                                                                                                                                                                                                                                                                                                                                                                                                                                                                                                                                                                                                                                                                                                                                                                               |   |         |          |          |   |         |          |          |   |         |          |          |   |         |          |          |   |         |          |          |   |         |          |          |   |          |          |          |   |         |          |          |   |         |          |          |   |          |          |          |   |         |         |         |   |          |         |         |   |         |         |         |   |          |         |         |   |          |         |         |   |         |         |         |   |         |          |         |   |          |         |         |   |         |         |         |   |          |         |         |   |          |          |          |   |          |          |          |   |          |          |          |   |          |          |          |   |          |          |          |   |          |          |          |   |          |         |          |   |          |         |          |   |          |         |          |   |          |         |          |    |          |         |         |
| H                                                                                                                                                       | 3.19694                                                                                                                                                                                                                                                                                                                                                                                                                                                                                                                                                                                                                                                                                                                                                                                                                                                                                                                                                                                                                                                                                                                                                                                                                                                                                                                                                                                                                                                                                                                                                                                                                                                                                                                                                                                                                                                                                                                                                                                                                                                                                                                                                                                                                                                                                | -0.00029 | 1.60462  |         |          |   |         |         |          |   |         |         |         |   |         |          |          |   |         |         |          |   |         |         |         |   |          |          |          |   |         |         |          |   |         |         |         |   |          |          |         |   |          |         |         |   |          |         |         |   |         |         |         |   |          |         |         |   |          |         |         |   |         |         |         |   |         |         |         |   |          |         |         |   |         |         |         |   |          |         |         |                                                                                                                                                          |                                                                                                                                                                                                                                                                                                                                                                                                                                                                                                                                                                                                                                                                                                                                                                                                                                                                                                                                                                                                                                                                                                                                                                                                                                                                                                                                                                                                                                                                                    |          |          |         |          |          |          |         |          |          |          |          |          |          |          |         |          |          |          |         |          |          |          |         |          |          |          |          |          |          |          |         |          |          |          |         |          |          |          |          |          |         |         |                                                                                                                                                         |                                                                                                                                                                                                                                                                                                                                                                                                                                                                                                                                                                                                                                                                                                                                                                                                                                                                                                                                                                                                                                                                                                                                                                                                                                                                                                                                                                                                                                                                                                                                                                                                                                                                                                                                                                                                                                                                                                                                                                                                                                                                                                                                                                                                                                                                                               |   |         |          |          |   |         |          |          |   |         |          |          |   |         |          |          |   |         |          |          |   |         |          |          |   |          |          |          |   |         |          |          |   |         |          |          |   |          |          |          |   |         |         |         |   |          |         |         |   |         |         |         |   |          |         |         |   |          |         |         |   |         |         |         |   |         |          |         |   |          |         |         |   |         |         |         |   |          |         |         |   |          |          |          |   |          |          |          |   |          |          |          |   |          |          |          |   |          |          |          |   |          |          |          |   |          |         |          |   |          |         |          |   |          |         |          |   |          |         |          |    |          |         |         |
| H                                                                                                                                                       | -1.22232                                                                                                                                                                                                                                                                                                                                                                                                                                                                                                                                                                                                                                                                                                                                                                                                                                                                                                                                                                                                                                                                                                                                                                                                                                                                                                                                                                                                                                                                                                                                                                                                                                                                                                                                                                                                                                                                                                                                                                                                                                                                                                                                                                                                                                                                               | 0.00193  | 3.68875  |         |          |   |         |         |          |   |         |         |         |   |         |          |          |   |         |         |          |   |         |         |         |   |          |          |          |   |         |         |          |   |         |         |         |   |          |          |         |   |          |         |         |   |          |         |         |   |         |         |         |   |          |         |         |   |          |         |         |   |         |         |         |   |         |         |         |   |          |         |         |   |         |         |         |   |          |         |         |                                                                                                                                                          |                                                                                                                                                                                                                                                                                                                                                                                                                                                                                                                                                                                                                                                                                                                                                                                                                                                                                                                                                                                                                                                                                                                                                                                                                                                                                                                                                                                                                                                                                    |          |          |         |          |          |          |         |          |          |          |          |          |          |          |         |          |          |          |         |          |          |          |         |          |          |          |          |          |          |          |         |          |          |          |         |          |          |          |          |          |         |         |                                                                                                                                                         |                                                                                                                                                                                                                                                                                                                                                                                                                                                                                                                                                                                                                                                                                                                                                                                                                                                                                                                                                                                                                                                                                                                                                                                                                                                                                                                                                                                                                                                                                                                                                                                                                                                                                                                                                                                                                                                                                                                                                                                                                                                                                                                                                                                                                                                                                               |   |         |          |          |   |         |          |          |   |         |          |          |   |         |          |          |   |         |          |          |   |         |          |          |   |          |          |          |   |         |          |          |   |         |          |          |   |          |          |          |   |         |         |         |   |          |         |         |   |         |         |         |   |          |         |         |   |          |         |         |   |         |         |         |   |         |          |         |   |          |         |         |   |         |         |         |   |          |         |         |   |          |          |          |   |          |          |          |   |          |          |          |   |          |          |          |   |          |          |          |   |          |          |          |   |          |         |          |   |          |         |          |   |          |         |          |   |          |         |          |    |          |         |         |
| H                                                                                                                                                       | 3.03800                                                                                                                                                                                                                                                                                                                                                                                                                                                                                                                                                                                                                                                                                                                                                                                                                                                                                                                                                                                                                                                                                                                                                                                                                                                                                                                                                                                                                                                                                                                                                                                                                                                                                                                                                                                                                                                                                                                                                                                                                                                                                                                                                                                                                                                                                | 0.00056  | 3.99029  |         |          |   |         |         |          |   |         |         |         |   |         |          |          |   |         |         |          |   |         |         |         |   |          |          |          |   |         |         |          |   |         |         |         |   |          |          |         |   |          |         |         |   |          |         |         |   |         |         |         |   |          |         |         |   |          |         |         |   |         |         |         |   |         |         |         |   |          |         |         |   |         |         |         |   |          |         |         |                                                                                                                                                          |                                                                                                                                                                                                                                                                                                                                                                                                                                                                                                                                                                                                                                                                                                                                                                                                                                                                                                                                                                                                                                                                                                                                                                                                                                                                                                                                                                                                                                                                                    |          |          |         |          |          |          |         |          |          |          |          |          |          |          |         |          |          |          |         |          |          |          |         |          |          |          |          |          |          |          |         |          |          |          |         |          |          |          |          |          |         |         |                                                                                                                                                         |                                                                                                                                                                                                                                                                                                                                                                                                                                                                                                                                                                                                                                                                                                                                                                                                                                                                                                                                                                                                                                                                                                                                                                                                                                                                                                                                                                                                                                                                                                                                                                                                                                                                                                                                                                                                                                                                                                                                                                                                                                                                                                                                                                                                                                                                                               |   |         |          |          |   |         |          |          |   |         |          |          |   |         |          |          |   |         |          |          |   |         |          |          |   |          |          |          |   |         |          |          |   |         |          |          |   |          |          |          |   |         |         |         |   |          |         |         |   |         |         |         |   |          |         |         |   |          |         |         |   |         |         |         |   |         |          |         |   |          |         |         |   |         |         |         |   |          |         |         |   |          |          |          |   |          |          |          |   |          |          |          |   |          |          |          |   |          |          |          |   |          |          |          |   |          |         |          |   |          |         |          |   |          |         |          |   |          |         |          |    |          |         |         |
| H                                                                                                                                                       | 0.79018                                                                                                                                                                                                                                                                                                                                                                                                                                                                                                                                                                                                                                                                                                                                                                                                                                                                                                                                                                                                                                                                                                                                                                                                                                                                                                                                                                                                                                                                                                                                                                                                                                                                                                                                                                                                                                                                                                                                                                                                                                                                                                                                                                                                                                                                                | 0.00152  | 5.10155  |         |          |   |         |         |          |   |         |         |         |   |         |          |          |   |         |         |          |   |         |         |         |   |          |          |          |   |         |         |          |   |         |         |         |   |          |          |         |   |          |         |         |   |          |         |         |   |         |         |         |   |          |         |         |   |          |         |         |   |         |         |         |   |         |         |         |   |          |         |         |   |         |         |         |   |          |         |         |                                                                                                                                                          |                                                                                                                                                                                                                                                                                                                                                                                                                                                                                                                                                                                                                                                                                                                                                                                                                                                                                                                                                                                                                                                                                                                                                                                                                                                                                                                                                                                                                                                                                    |          |          |         |          |          |          |         |          |          |          |          |          |          |          |         |          |          |          |         |          |          |          |         |          |          |          |          |          |          |          |         |          |          |          |         |          |          |          |          |          |         |         |                                                                                                                                                         |                                                                                                                                                                                                                                                                                                                                                                                                                                                                                                                                                                                                                                                                                                                                                                                                                                                                                                                                                                                                                                                                                                                                                                                                                                                                                                                                                                                                                                                                                                                                                                                                                                                                                                                                                                                                                                                                                                                                                                                                                                                                                                                                                                                                                                                                                               |   |         |          |          |   |         |          |          |   |         |          |          |   |         |          |          |   |         |          |          |   |         |          |          |   |          |          |          |   |         |          |          |   |         |          |          |   |          |          |          |   |         |         |         |   |          |         |         |   |         |         |         |   |          |         |         |   |          |         |         |   |         |         |         |   |         |          |         |   |          |         |         |   |         |         |         |   |          |         |         |   |          |          |          |   |          |          |          |   |          |          |          |   |          |          |          |   |          |          |          |   |          |          |          |   |          |         |          |   |          |         |          |   |          |         |          |   |          |         |          |    |          |         |         |
| C                                                                                                                                                       | -0.55867                                                                                                                                                                                                                                                                                                                                                                                                                                                                                                                                                                                                                                                                                                                                                                                                                                                                                                                                                                                                                                                                                                                                                                                                                                                                                                                                                                                                                                                                                                                                                                                                                                                                                                                                                                                                                                                                                                                                                                                                                                                                                                                                                                                                                                                                               | -0.00094 | -3.63870 |         |          |   |         |         |          |   |         |         |         |   |         |          |          |   |         |         |          |   |         |         |         |   |          |          |          |   |         |         |          |   |         |         |         |   |          |          |         |   |          |         |         |   |          |         |         |   |         |         |         |   |          |         |         |   |          |         |         |   |         |         |         |   |         |         |         |   |          |         |         |   |         |         |         |   |          |         |         |                                                                                                                                                          |                                                                                                                                                                                                                                                                                                                                                                                                                                                                                                                                                                                                                                                                                                                                                                                                                                                                                                                                                                                                                                                                                                                                                                                                                                                                                                                                                                                                                                                                                    |          |          |         |          |          |          |         |          |          |          |          |          |          |          |         |          |          |          |         |          |          |          |         |          |          |          |          |          |          |          |         |          |          |          |         |          |          |          |          |          |         |         |                                                                                                                                                         |                                                                                                                                                                                                                                                                                                                                                                                                                                                                                                                                                                                                                                                                                                                                                                                                                                                                                                                                                                                                                                                                                                                                                                                                                                                                                                                                                                                                                                                                                                                                                                                                                                                                                                                                                                                                                                                                                                                                                                                                                                                                                                                                                                                                                                                                                               |   |         |          |          |   |         |          |          |   |         |          |          |   |         |          |          |   |         |          |          |   |         |          |          |   |          |          |          |   |         |          |          |   |         |          |          |   |          |          |          |   |         |         |         |   |          |         |         |   |         |         |         |   |          |         |         |   |          |         |         |   |         |         |         |   |         |          |         |   |          |         |         |   |         |         |         |   |          |         |         |   |          |          |          |   |          |          |          |   |          |          |          |   |          |          |          |   |          |          |          |   |          |          |          |   |          |         |          |   |          |         |          |   |          |         |          |   |          |         |          |    |          |         |         |
| H                                                                                                                                                       | -0.13694                                                                                                                                                                                                                                                                                                                                                                                                                                                                                                                                                                                                                                                                                                                                                                                                                                                                                                                                                                                                                                                                                                                                                                                                                                                                                                                                                                                                                                                                                                                                                                                                                                                                                                                                                                                                                                                                                                                                                                                                                                                                                                                                                                                                                                                                               | -0.00463 | -4.64783 |         |          |   |         |         |          |   |         |         |         |   |         |          |          |   |         |         |          |   |         |         |         |   |          |          |          |   |         |         |          |   |         |         |         |   |          |          |         |   |          |         |         |   |          |         |         |   |         |         |         |   |          |         |         |   |          |         |         |   |         |         |         |   |         |         |         |   |          |         |         |   |         |         |         |   |          |         |         |                                                                                                                                                          |                                                                                                                                                                                                                                                                                                                                                                                                                                                                                                                                                                                                                                                                                                                                                                                                                                                                                                                                                                                                                                                                                                                                                                                                                                                                                                                                                                                                                                                                                    |          |          |         |          |          |          |         |          |          |          |          |          |          |          |         |          |          |          |         |          |          |          |         |          |          |          |          |          |          |          |         |          |          |          |         |          |          |          |          |          |         |         |                                                                                                                                                         |                                                                                                                                                                                                                                                                                                                                                                                                                                                                                                                                                                                                                                                                                                                                                                                                                                                                                                                                                                                                                                                                                                                                                                                                                                                                                                                                                                                                                                                                                                                                                                                                                                                                                                                                                                                                                                                                                                                                                                                                                                                                                                                                                                                                                                                                                               |   |         |          |          |   |         |          |          |   |         |          |          |   |         |          |          |   |         |          |          |   |         |          |          |   |          |          |          |   |         |          |          |   |         |          |          |   |          |          |          |   |         |         |         |   |          |         |         |   |         |         |         |   |          |         |         |   |          |         |         |   |         |         |         |   |         |          |         |   |          |         |         |   |         |         |         |   |          |         |         |   |          |          |          |   |          |          |          |   |          |          |          |   |          |          |          |   |          |          |          |   |          |          |          |   |          |         |          |   |          |         |          |   |          |         |          |   |          |         |          |    |          |         |         |
| C                                                                                                                                                       | -1.42519                                                                                                                                                                                                                                                                                                                                                                                                                                                                                                                                                                                                                                                                                                                                                                                                                                                                                                                                                                                                                                                                                                                                                                                                                                                                                                                                                                                                                                                                                                                                                                                                                                                                                                                                                                                                                                                                                                                                                                                                                                                                                                                                                                                                                                                                               | -1.25717 | -3.47785 |         |          |   |         |         |          |   |         |         |         |   |         |          |          |   |         |         |          |   |         |         |         |   |          |          |          |   |         |         |          |   |         |         |         |   |          |          |         |   |          |         |         |   |          |         |         |   |         |         |         |   |          |         |         |   |          |         |         |   |         |         |         |   |         |         |         |   |          |         |         |   |         |         |         |   |          |         |         |                                                                                                                                                          |                                                                                                                                                                                                                                                                                                                                                                                                                                                                                                                                                                                                                                                                                                                                                                                                                                                                                                                                                                                                                                                                                                                                                                                                                                                                                                                                                                                                                                                                                    |          |          |         |          |          |          |         |          |          |          |          |          |          |          |         |          |          |          |         |          |          |          |         |          |          |          |          |          |          |          |         |          |          |          |         |          |          |          |          |          |         |         |                                                                                                                                                         |                                                                                                                                                                                                                                                                                                                                                                                                                                                                                                                                                                                                                                                                                                                                                                                                                                                                                                                                                                                                                                                                                                                                                                                                                                                                                                                                                                                                                                                                                                                                                                                                                                                                                                                                                                                                                                                                                                                                                                                                                                                                                                                                                                                                                                                                                               |   |         |          |          |   |         |          |          |   |         |          |          |   |         |          |          |   |         |          |          |   |         |          |          |   |          |          |          |   |         |          |          |   |         |          |          |   |          |          |          |   |         |         |         |   |          |         |         |   |         |         |         |   |          |         |         |   |          |         |         |   |         |         |         |   |         |          |         |   |          |         |         |   |         |         |         |   |          |         |         |   |          |          |          |   |          |          |          |   |          |          |          |   |          |          |          |   |          |          |          |   |          |          |          |   |          |         |          |   |          |         |          |   |          |         |          |   |          |         |          |    |          |         |         |
| H                                                                                                                                                       | -1.86910                                                                                                                                                                                                                                                                                                                                                                                                                                                                                                                                                                                                                                                                                                                                                                                                                                                                                                                                                                                                                                                                                                                                                                                                                                                                                                                                                                                                                                                                                                                                                                                                                                                                                                                                                                                                                                                                                                                                                                                                                                                                                                                                                                                                                                                                               | -1.28690 | -2.48001 |         |          |   |         |         |          |   |         |         |         |   |         |          |          |   |         |         |          |   |         |         |         |   |          |          |          |   |         |         |          |   |         |         |         |   |          |          |         |   |          |         |         |   |          |         |         |   |         |         |         |   |          |         |         |   |          |         |         |   |         |         |         |   |         |         |         |   |          |         |         |   |         |         |         |   |          |         |         |                                                                                                                                                          |                                                                                                                                                                                                                                                                                                                                                                                                                                                                                                                                                                                                                                                                                                                                                                                                                                                                                                                                                                                                                                                                                                                                                                                                                                                                                                                                                                                                                                                                                    |          |          |         |          |          |          |         |          |          |          |          |          |          |          |         |          |          |          |         |          |          |          |         |          |          |          |          |          |          |          |         |          |          |          |         |          |          |          |          |          |         |         |                                                                                                                                                         |                                                                                                                                                                                                                                                                                                                                                                                                                                                                                                                                                                                                                                                                                                                                                                                                                                                                                                                                                                                                                                                                                                                                                                                                                                                                                                                                                                                                                                                                                                                                                                                                                                                                                                                                                                                                                                                                                                                                                                                                                                                                                                                                                                                                                                                                                               |   |         |          |          |   |         |          |          |   |         |          |          |   |         |          |          |   |         |          |          |   |         |          |          |   |          |          |          |   |         |          |          |   |         |          |          |   |          |          |          |   |         |         |         |   |          |         |         |   |         |         |         |   |          |         |         |   |          |         |         |   |         |         |         |   |         |          |         |   |          |         |         |   |         |         |         |   |          |         |         |   |          |          |          |   |          |          |          |   |          |          |          |   |          |          |          |   |          |          |          |   |          |          |          |   |          |         |          |   |          |         |          |   |          |         |          |   |          |         |          |    |          |         |         |
| H                                                                                                                                                       | -0.83287                                                                                                                                                                                                                                                                                                                                                                                                                                                                                                                                                                                                                                                                                                                                                                                                                                                                                                                                                                                                                                                                                                                                                                                                                                                                                                                                                                                                                                                                                                                                                                                                                                                                                                                                                                                                                                                                                                                                                                                                                                                                                                                                                                                                                                                                               | -2.16434 | -3.61176 |         |          |   |         |         |          |   |         |         |         |   |         |          |          |   |         |         |          |   |         |         |         |   |          |          |          |   |         |         |          |   |         |         |         |   |          |          |         |   |          |         |         |   |          |         |         |   |         |         |         |   |          |         |         |   |          |         |         |   |         |         |         |   |         |         |         |   |          |         |         |   |         |         |         |   |          |         |         |                                                                                                                                                          |                                                                                                                                                                                                                                                                                                                                                                                                                                                                                                                                                                                                                                                                                                                                                                                                                                                                                                                                                                                                                                                                                                                                                                                                                                                                                                                                                                                                                                                                                    |          |          |         |          |          |          |         |          |          |          |          |          |          |          |         |          |          |          |         |          |          |          |         |          |          |          |          |          |          |          |         |          |          |          |         |          |          |          |          |          |         |         |                                                                                                                                                         |                                                                                                                                                                                                                                                                                                                                                                                                                                                                                                                                                                                                                                                                                                                                                                                                                                                                                                                                                                                                                                                                                                                                                                                                                                                                                                                                                                                                                                                                                                                                                                                                                                                                                                                                                                                                                                                                                                                                                                                                                                                                                                                                                                                                                                                                                               |   |         |          |          |   |         |          |          |   |         |          |          |   |         |          |          |   |         |          |          |   |         |          |          |   |          |          |          |   |         |          |          |   |         |          |          |   |          |          |          |   |         |         |         |   |          |         |         |   |         |         |         |   |          |         |         |   |          |         |         |   |         |         |         |   |         |          |         |   |          |         |         |   |         |         |         |   |          |         |         |   |          |          |          |   |          |          |          |   |          |          |          |   |          |          |          |   |          |          |          |   |          |          |          |   |          |         |          |   |          |         |          |   |          |         |          |   |          |         |          |    |          |         |         |
| H                                                                                                                                                       | -2.23575                                                                                                                                                                                                                                                                                                                                                                                                                                                                                                                                                                                                                                                                                                                                                                                                                                                                                                                                                                                                                                                                                                                                                                                                                                                                                                                                                                                                                                                                                                                                                                                                                                                                                                                                                                                                                                                                                                                                                                                                                                                                                                                                                                                                                                                                               | -1.25726 | -4.21048 |         |          |   |         |         |          |   |         |         |         |   |         |          |          |   |         |         |          |   |         |         |         |   |          |          |          |   |         |         |          |   |         |         |         |   |          |          |         |   |          |         |         |   |          |         |         |   |         |         |         |   |          |         |         |   |          |         |         |   |         |         |         |   |         |         |         |   |          |         |         |   |         |         |         |   |          |         |         |                                                                                                                                                          |                                                                                                                                                                                                                                                                                                                                                                                                                                                                                                                                                                                                                                                                                                                                                                                                                                                                                                                                                                                                                                                                                                                                                                                                                                                                                                                                                                                                                                                                                    |          |          |         |          |          |          |         |          |          |          |          |          |          |          |         |          |          |          |         |          |          |          |         |          |          |          |          |          |          |          |         |          |          |          |         |          |          |          |          |          |         |         |                                                                                                                                                         |                                                                                                                                                                                                                                                                                                                                                                                                                                                                                                                                                                                                                                                                                                                                                                                                                                                                                                                                                                                                                                                                                                                                                                                                                                                                                                                                                                                                                                                                                                                                                                                                                                                                                                                                                                                                                                                                                                                                                                                                                                                                                                                                                                                                                                                                                               |   |         |          |          |   |         |          |          |   |         |          |          |   |         |          |          |   |         |          |          |   |         |          |          |   |          |          |          |   |         |          |          |   |         |          |          |   |          |          |          |   |         |         |         |   |          |         |         |   |         |         |         |   |          |         |         |   |          |         |         |   |         |         |         |   |         |          |         |   |          |         |         |   |         |         |         |   |          |         |         |   |          |          |          |   |          |          |          |   |          |          |          |   |          |          |          |   |          |          |          |   |          |          |          |   |          |         |          |   |          |         |          |   |          |         |          |   |          |         |          |    |          |         |         |
| C                                                                                                                                                       | -1.41730                                                                                                                                                                                                                                                                                                                                                                                                                                                                                                                                                                                                                                                                                                                                                                                                                                                                                                                                                                                                                                                                                                                                                                                                                                                                                                                                                                                                                                                                                                                                                                                                                                                                                                                                                                                                                                                                                                                                                                                                                                                                                                                                                                                                                                                                               | 1.26150  | -3.48377 |         |          |   |         |         |          |   |         |         |         |   |         |          |          |   |         |         |          |   |         |         |         |   |          |          |          |   |         |         |          |   |         |         |         |   |          |          |         |   |          |         |         |   |          |         |         |   |         |         |         |   |          |         |         |   |          |         |         |   |         |         |         |   |         |         |         |   |          |         |         |   |         |         |         |   |          |         |         |                                                                                                                                                          |                                                                                                                                                                                                                                                                                                                                                                                                                                                                                                                                                                                                                                                                                                                                                                                                                                                                                                                                                                                                                                                                                                                                                                                                                                                                                                                                                                                                                                                                                    |          |          |         |          |          |          |         |          |          |          |          |          |          |          |         |          |          |          |         |          |          |          |         |          |          |          |          |          |          |          |         |          |          |          |         |          |          |          |          |          |         |         |                                                                                                                                                         |                                                                                                                                                                                                                                                                                                                                                                                                                                                                                                                                                                                                                                                                                                                                                                                                                                                                                                                                                                                                                                                                                                                                                                                                                                                                                                                                                                                                                                                                                                                                                                                                                                                                                                                                                                                                                                                                                                                                                                                                                                                                                                                                                                                                                                                                                               |   |         |          |          |   |         |          |          |   |         |          |          |   |         |          |          |   |         |          |          |   |         |          |          |   |          |          |          |   |         |          |          |   |         |          |          |   |          |          |          |   |         |         |         |   |          |         |         |   |         |         |         |   |          |         |         |   |          |         |         |   |         |         |         |   |         |          |         |   |          |         |         |   |         |         |         |   |          |         |         |   |          |          |          |   |          |          |          |   |          |          |          |   |          |          |          |   |          |          |          |   |          |          |          |   |          |         |          |   |          |         |          |   |          |         |          |   |          |         |          |    |          |         |         |
| H                                                                                                                                                       | -1.86023                                                                                                                                                                                                                                                                                                                                                                                                                                                                                                                                                                                                                                                                                                                                                                                                                                                                                                                                                                                                                                                                                                                                                                                                                                                                                                                                                                                                                                                                                                                                                                                                                                                                                                                                                                                                                                                                                                                                                                                                                                                                                                                                                                                                                                                                               | 1.29886  | -2.48574 |         |          |   |         |         |          |   |         |         |         |   |         |          |          |   |         |         |          |   |         |         |         |   |          |          |          |   |         |         |          |   |         |         |         |   |          |          |         |   |          |         |         |   |          |         |         |   |         |         |         |   |          |         |         |   |          |         |         |   |         |         |         |   |         |         |         |   |          |         |         |   |         |         |         |   |          |         |         |                                                                                                                                                          |                                                                                                                                                                                                                                                                                                                                                                                                                                                                                                                                                                                                                                                                                                                                                                                                                                                                                                                                                                                                                                                                                                                                                                                                                                                                                                                                                                                                                                                                                    |          |          |         |          |          |          |         |          |          |          |          |          |          |          |         |          |          |          |         |          |          |          |         |          |          |          |          |          |          |          |         |          |          |          |         |          |          |          |          |          |         |         |                                                                                                                                                         |                                                                                                                                                                                                                                                                                                                                                                                                                                                                                                                                                                                                                                                                                                                                                                                                                                                                                                                                                                                                                                                                                                                                                                                                                                                                                                                                                                                                                                                                                                                                                                                                                                                                                                                                                                                                                                                                                                                                                                                                                                                                                                                                                                                                                                                                                               |   |         |          |          |   |         |          |          |   |         |          |          |   |         |          |          |   |         |          |          |   |         |          |          |   |          |          |          |   |         |          |          |   |         |          |          |   |          |          |          |   |         |         |         |   |          |         |         |   |         |         |         |   |          |         |         |   |          |         |         |   |         |         |         |   |         |          |         |   |          |         |         |   |         |         |         |   |          |         |         |   |          |          |          |   |          |          |          |   |          |          |          |   |          |          |          |   |          |          |          |   |          |          |          |   |          |         |          |   |          |         |          |   |          |         |          |   |          |         |          |    |          |         |         |
| H                                                                                                                                                       | -2.22831                                                                                                                                                                                                                                                                                                                                                                                                                                                                                                                                                                                                                                                                                                                                                                                                                                                                                                                                                                                                                                                                                                                                                                                                                                                                                                                                                                                                                                                                                                                                                                                                                                                                                                                                                                                                                                                                                                                                                                                                                                                                                                                                                                                                                                                                               | 1.26303  | -4.21591 |         |          |   |         |         |          |   |         |         |         |   |         |          |          |   |         |         |          |   |         |         |         |   |          |          |          |   |         |         |          |   |         |         |         |   |          |          |         |   |          |         |         |   |          |         |         |   |         |         |         |   |          |         |         |   |          |         |         |   |         |         |         |   |         |         |         |   |          |         |         |   |         |         |         |   |          |         |         |                                                                                                                                                          |                                                                                                                                                                                                                                                                                                                                                                                                                                                                                                                                                                                                                                                                                                                                                                                                                                                                                                                                                                                                                                                                                                                                                                                                                                                                                                                                                                                                                                                                                    |          |          |         |          |          |          |         |          |          |          |          |          |          |          |         |          |          |          |         |          |          |          |         |          |          |          |          |          |          |          |         |          |          |          |         |          |          |          |          |          |         |         |                                                                                                                                                         |                                                                                                                                                                                                                                                                                                                                                                                                                                                                                                                                                                                                                                                                                                                                                                                                                                                                                                                                                                                                                                                                                                                                                                                                                                                                                                                                                                                                                                                                                                                                                                                                                                                                                                                                                                                                                                                                                                                                                                                                                                                                                                                                                                                                                                                                                               |   |         |          |          |   |         |          |          |   |         |          |          |   |         |          |          |   |         |          |          |   |         |          |          |   |          |          |          |   |         |          |          |   |         |          |          |   |          |          |          |   |         |         |         |   |          |         |         |   |         |         |         |   |          |         |         |   |          |         |         |   |         |         |         |   |         |          |         |   |          |         |         |   |         |         |         |   |          |         |         |   |          |          |          |   |          |          |          |   |          |          |          |   |          |          |          |   |          |          |          |   |          |          |          |   |          |         |          |   |          |         |          |   |          |         |          |   |          |         |          |    |          |         |         |
| H                                                                                                                                                       | -0.81937                                                                                                                                                                                                                                                                                                                                                                                                                                                                                                                                                                                                                                                                                                                                                                                                                                                                                                                                                                                                                                                                                                                                                                                                                                                                                                                                                                                                                                                                                                                                                                                                                                                                                                                                                                                                                                                                                                                                                                                                                                                                                                                                                                                                                                                                               | 2.16424  | -3.62254 |         |          |   |         |         |          |   |         |         |         |   |         |          |          |   |         |         |          |   |         |         |         |   |          |          |          |   |         |         |          |   |         |         |         |   |          |          |         |   |          |         |         |   |          |         |         |   |         |         |         |   |          |         |         |   |          |         |         |   |         |         |         |   |         |         |         |   |          |         |         |   |         |         |         |   |          |         |         |                                                                                                                                                          |                                                                                                                                                                                                                                                                                                                                                                                                                                                                                                                                                                                                                                                                                                                                                                                                                                                                                                                                                                                                                                                                                                                                                                                                                                                                                                                                                                                                                                                                                    |          |          |         |          |          |          |         |          |          |          |          |          |          |          |         |          |          |          |         |          |          |          |         |          |          |          |          |          |          |          |         |          |          |          |         |          |          |          |          |          |         |         |                                                                                                                                                         |                                                                                                                                                                                                                                                                                                                                                                                                                                                                                                                                                                                                                                                                                                                                                                                                                                                                                                                                                                                                                                                                                                                                                                                                                                                                                                                                                                                                                                                                                                                                                                                                                                                                                                                                                                                                                                                                                                                                                                                                                                                                                                                                                                                                                                                                                               |   |         |          |          |   |         |          |          |   |         |          |          |   |         |          |          |   |         |          |          |   |         |          |          |   |          |          |          |   |         |          |          |   |         |          |          |   |          |          |          |   |         |         |         |   |          |         |         |   |         |         |         |   |          |         |         |   |          |         |         |   |         |         |         |   |         |          |         |   |          |         |         |   |         |         |         |   |          |         |         |   |          |          |          |   |          |          |          |   |          |          |          |   |          |          |          |   |          |          |          |   |          |          |          |   |          |         |          |   |          |         |          |   |          |         |          |   |          |         |          |    |          |         |         |
| Br                                                                                                                                                      | -1.91588                                                                                                                                                                                                                                                                                                                                                                                                                                                                                                                                                                                                                                                                                                                                                                                                                                                                                                                                                                                                                                                                                                                                                                                                                                                                                                                                                                                                                                                                                                                                                                                                                                                                                                                                                                                                                                                                                                                                                                                                                                                                                                                                                                                                                                                                               | 0.00182  | 1.03173  |         |          |   |         |         |          |   |         |         |         |   |         |          |          |   |         |         |          |   |         |         |         |   |          |          |          |   |         |         |          |   |         |         |         |   |          |          |         |   |          |         |         |   |          |         |         |   |         |         |         |   |          |         |         |   |          |         |         |   |         |         |         |   |         |         |         |   |          |         |         |   |         |         |         |   |          |         |         |                                                                                                                                                          |                                                                                                                                                                                                                                                                                                                                                                                                                                                                                                                                                                                                                                                                                                                                                                                                                                                                                                                                                                                                                                                                                                                                                                                                                                                                                                                                                                                                                                                                                    |          |          |         |          |          |          |         |          |          |          |          |          |          |          |         |          |          |          |         |          |          |          |         |          |          |          |          |          |          |          |         |          |          |          |         |          |          |          |          |          |         |         |                                                                                                                                                         |                                                                                                                                                                                                                                                                                                                                                                                                                                                                                                                                                                                                                                                                                                                                                                                                                                                                                                                                                                                                                                                                                                                                                                                                                                                                                                                                                                                                                                                                                                                                                                                                                                                                                                                                                                                                                                                                                                                                                                                                                                                                                                                                                                                                                                                                                               |   |         |          |          |   |         |          |          |   |         |          |          |   |         |          |          |   |         |          |          |   |         |          |          |   |          |          |          |   |         |          |          |   |         |          |          |   |          |          |          |   |         |         |         |   |          |         |         |   |         |         |         |   |          |         |         |   |          |         |         |   |         |         |         |   |         |          |         |   |          |         |         |   |         |         |         |   |          |         |         |   |          |          |          |   |          |          |          |   |          |          |          |   |          |          |          |   |          |          |          |   |          |          |          |   |          |         |          |   |          |         |          |   |          |         |          |   |          |         |          |    |          |         |         |
|  <p><b>1g</b><br/>-878.2216168<br/>-878.6392616<br/>-878.5762347</p> | <table border="1"> <tbody> <tr><td>H</td><td>1.52740</td><td>0.26900</td><td>-3.04889</td></tr> <tr><td>C</td><td>1.17913</td><td>0.40096</td><td>-2.03149</td></tr> <tr><td>C</td><td>0.26931</td><td>0.74834</td><td>0.58173</td></tr> <tr><td>C</td><td>0.31161</td><td>-0.54087</td><td>-1.48123</td></tr> <tr><td>C</td><td>1.59769</td><td>1.50100</td><td>-1.28864</td></tr> <tr><td>C</td><td>1.14871</td><td>1.67482</td><td>0.01408</td></tr> <tr><td>C</td><td>-0.13077</td><td>-0.35271</td><td>-0.17296</td></tr> <tr><td>H</td><td>2.27047</td><td>2.22619</td><td>-1.72812</td></tr> <tr><td>H</td><td>1.46302</td><td>2.53380</td><td>0.59237</td></tr> <tr><td>H</td><td>-0.79990</td><td>-1.07778</td><td>0.26998</td></tr> <tr><td>C</td><td>-0.18601</td><td>0.92169</td><td>1.98228</td></tr> <tr><td>C</td><td>-0.88257</td><td>1.22830</td><td>4.69573</td></tr> <tr><td>C</td><td>0.78924</td><td>1.03768</td><td>2.98339</td></tr> <tr><td>C</td><td>-1.52789</td><td>0.98129</td><td>2.38464</td></tr> <tr><td>C</td><td>-1.87345</td><td>1.12898</td><td>3.72655</td></tr> <tr><td>C</td><td>0.45556</td><td>1.18851</td><td>4.32129</td></tr> <tr><td>H</td><td>1.82865</td><td>0.99045</td><td>2.68612</td></tr> <tr><td>H</td><td>-2.91395</td><td>1.17838</td><td>4.01418</td></tr> <tr><td>H</td><td>1.23585</td><td>1.26806</td><td>5.06659</td></tr> <tr><td>H</td><td>-1.16175</td><td>1.34249</td><td>5.73489</td></tr> </tbody> </table>                                                                                                                                                                                                                                                                                                                                                                                                                                                                                                                                                                                                                                                                                                                                                                                                          | H        | 1.52740  | 0.26900 | -3.04889 | C | 1.17913 | 0.40096 | -2.03149 | C | 0.26931 | 0.74834 | 0.58173 | C | 0.31161 | -0.54087 | -1.48123 | C | 1.59769 | 1.50100 | -1.28864 | C | 1.14871 | 1.67482 | 0.01408 | C | -0.13077 | -0.35271 | -0.17296 | H | 2.27047 | 2.22619 | -1.72812 | H | 1.46302 | 2.53380 | 0.59237 | H | -0.79990 | -1.07778 | 0.26998 | C | -0.18601 | 0.92169 | 1.98228 | C | -0.88257 | 1.22830 | 4.69573 | C | 0.78924 | 1.03768 | 2.98339 | C | -1.52789 | 0.98129 | 2.38464 | C | -1.87345 | 1.12898 | 3.72655 | C | 0.45556 | 1.18851 | 4.32129 | H | 1.82865 | 0.99045 | 2.68612 | H | -2.91395 | 1.17838 | 4.01418 | H | 1.23585 | 1.26806 | 5.06659 | H | -1.16175 | 1.34249 | 5.73489 |  <p><b>1g</b><br/>-878.2064202<br/>-878.6240332<br/>-878.5625896</p> | <table border="1"> <tbody> <tr><td>H</td><td>1.69176</td><td>0.00544</td><td>-4.68808</td></tr> <tr><td>C</td><td>1.66914</td><td>0.00386</td><td>-3.60510</td></tr> <tr><td>C</td><td>1.61342</td><td>-0.00023</td><td>-0.76473</td></tr> <tr><td>C</td><td>0.45369</td><td>0.00004</td><td>-2.93557</td></tr> <tr><td>C</td><td>2.85085</td><td>0.00562</td><td>-2.87107</td></tr> <tr><td>C</td><td>2.82656</td><td>0.00363</td><td>-1.48654</td></tr> <tr><td>C</td><td>0.45071</td><td>-0.00191</td><td>-1.54006</td></tr> <tr><td>H</td><td>3.80601</td><td>0.00861</td><td>-3.38039</td></tr> <tr><td>H</td><td>3.78119</td><td>0.00524</td><td>-0.98830</td></tr> <tr><td>H</td><td>-0.51026</td><td>-0.00484</td><td>-1.06572</td></tr> <tr><td>C</td><td>1.61323</td><td>-0.00214</td><td>0.73946</td></tr> <tr><td>C</td><td>1.93925</td><td>-0.00430</td><td>3.59168</td></tr> <tr><td>C</td><td>2.87012</td><td>0.00000</td><td>1.38749</td></tr> <tr><td>C</td><td>0.50756</td><td>-0.00575</td><td>1.62739</td></tr> <tr><td>C</td><td>0.68116</td><td>-0.00669</td><td>3.01576</td></tr> <tr><td>C</td><td>3.04667</td><td>-0.00099</td><td>2.75775</td></tr> <tr><td>H</td><td>3.76574</td><td>0.00263</td><td>0.79131</td></tr> <tr><td>H</td><td>-0.18577</td><td>-0.00937</td><td>3.66001</td></tr> <tr><td>H</td><td>4.04920</td><td>0.00086</td><td>3.16449</td></tr> <tr><td>H</td><td>2.04116</td><td>-0.00508</td><td>4.66859</td></tr> </tbody> </table> | H        | 1.69176  | 0.00544 | -4.68808 | C        | 1.66914  | 0.00386 | -3.60510 | C        | 1.61342  | -0.00023 | -0.76473 | C        | 0.45369  | 0.00004 | -2.93557 | C        | 2.85085  | 0.00562 | -2.87107 | C        | 2.82656  | 0.00363 | -1.48654 | C        | 0.45071  | -0.00191 | -1.54006 | H        | 3.80601  | 0.00861 | -3.38039 | H        | 3.78119  | 0.00524 | -0.98830 | H        | -0.51026 | -0.00484 | -1.06572 | C       | 1.61323 | -0.00214                                                                                                                                                | 0.73946                                                                                                                                                                                                                                                                                                                                                                                                                                                                                                                                                                                                                                                                                                                                                                                                                                                                                                                                                                                                                                                                                                                                                                                                                                                                                                                                                                                                                                                                                                                                                                                                                                                                                                                                                                                                                                                                                                                                                                                                                                                                                                                                                                                                                                                                                       | C | 1.93925 | -0.00430 | 3.59168  | C | 2.87012 | 0.00000  | 1.38749  | C | 0.50756 | -0.00575 | 1.62739  | C | 0.68116 | -0.00669 | 3.01576  | C | 3.04667 | -0.00099 | 2.75775  | H | 3.76574 | 0.00263  | 0.79131  | H | -0.18577 | -0.00937 | 3.66001  | H | 4.04920 | 0.00086  | 3.16449  | H | 2.04116 | -0.00508 | 4.66859  |   |          |          |          |   |         |         |         |   |          |         |         |   |         |         |         |   |          |         |         |   |          |         |         |   |         |         |         |   |         |          |         |   |          |         |         |   |         |         |         |   |          |         |         |   |          |          |          |   |          |          |          |   |          |          |          |   |          |          |          |   |          |          |          |   |          |          |          |   |          |         |          |   |          |         |          |   |          |         |          |   |          |         |          |    |          |         |         |
| H                                                                                                                                                       | 1.52740                                                                                                                                                                                                                                                                                                                                                                                                                                                                                                                                                                                                                                                                                                                                                                                                                                                                                                                                                                                                                                                                                                                                                                                                                                                                                                                                                                                                                                                                                                                                                                                                                                                                                                                                                                                                                                                                                                                                                                                                                                                                                                                                                                                                                                                                                | 0.26900  | -3.04889 |         |          |   |         |         |          |   |         |         |         |   |         |          |          |   |         |         |          |   |         |         |         |   |          |          |          |   |         |         |          |   |         |         |         |   |          |          |         |   |          |         |         |   |          |         |         |   |         |         |         |   |          |         |         |   |          |         |         |   |         |         |         |   |         |         |         |   |          |         |         |   |         |         |         |   |          |         |         |                                                                                                                                                          |                                                                                                                                                                                                                                                                                                                                                                                                                                                                                                                                                                                                                                                                                                                                                                                                                                                                                                                                                                                                                                                                                                                                                                                                                                                                                                                                                                                                                                                                                    |          |          |         |          |          |          |         |          |          |          |          |          |          |          |         |          |          |          |         |          |          |          |         |          |          |          |          |          |          |          |         |          |          |          |         |          |          |          |          |          |         |         |                                                                                                                                                         |                                                                                                                                                                                                                                                                                                                                                                                                                                                                                                                                                                                                                                                                                                                                                                                                                                                                                                                                                                                                                                                                                                                                                                                                                                                                                                                                                                                                                                                                                                                                                                                                                                                                                                                                                                                                                                                                                                                                                                                                                                                                                                                                                                                                                                                                                               |   |         |          |          |   |         |          |          |   |         |          |          |   |         |          |          |   |         |          |          |   |         |          |          |   |          |          |          |   |         |          |          |   |         |          |          |   |          |          |          |   |         |         |         |   |          |         |         |   |         |         |         |   |          |         |         |   |          |         |         |   |         |         |         |   |         |          |         |   |          |         |         |   |         |         |         |   |          |         |         |   |          |          |          |   |          |          |          |   |          |          |          |   |          |          |          |   |          |          |          |   |          |          |          |   |          |         |          |   |          |         |          |   |          |         |          |   |          |         |          |    |          |         |         |
| C                                                                                                                                                       | 1.17913                                                                                                                                                                                                                                                                                                                                                                                                                                                                                                                                                                                                                                                                                                                                                                                                                                                                                                                                                                                                                                                                                                                                                                                                                                                                                                                                                                                                                                                                                                                                                                                                                                                                                                                                                                                                                                                                                                                                                                                                                                                                                                                                                                                                                                                                                | 0.40096  | -2.03149 |         |          |   |         |         |          |   |         |         |         |   |         |          |          |   |         |         |          |   |         |         |         |   |          |          |          |   |         |         |          |   |         |         |         |   |          |          |         |   |          |         |         |   |          |         |         |   |         |         |         |   |          |         |         |   |          |         |         |   |         |         |         |   |         |         |         |   |          |         |         |   |         |         |         |   |          |         |         |                                                                                                                                                          |                                                                                                                                                                                                                                                                                                                                                                                                                                                                                                                                                                                                                                                                                                                                                                                                                                                                                                                                                                                                                                                                                                                                                                                                                                                                                                                                                                                                                                                                                    |          |          |         |          |          |          |         |          |          |          |          |          |          |          |         |          |          |          |         |          |          |          |         |          |          |          |          |          |          |          |         |          |          |          |         |          |          |          |          |          |         |         |                                                                                                                                                         |                                                                                                                                                                                                                                                                                                                                                                                                                                                                                                                                                                                                                                                                                                                                                                                                                                                                                                                                                                                                                                                                                                                                                                                                                                                                                                                                                                                                                                                                                                                                                                                                                                                                                                                                                                                                                                                                                                                                                                                                                                                                                                                                                                                                                                                                                               |   |         |          |          |   |         |          |          |   |         |          |          |   |         |          |          |   |         |          |          |   |         |          |          |   |          |          |          |   |         |          |          |   |         |          |          |   |          |          |          |   |         |         |         |   |          |         |         |   |         |         |         |   |          |         |         |   |          |         |         |   |         |         |         |   |         |          |         |   |          |         |         |   |         |         |         |   |          |         |         |   |          |          |          |   |          |          |          |   |          |          |          |   |          |          |          |   |          |          |          |   |          |          |          |   |          |         |          |   |          |         |          |   |          |         |          |   |          |         |          |    |          |         |         |
| C                                                                                                                                                       | 0.26931                                                                                                                                                                                                                                                                                                                                                                                                                                                                                                                                                                                                                                                                                                                                                                                                                                                                                                                                                                                                                                                                                                                                                                                                                                                                                                                                                                                                                                                                                                                                                                                                                                                                                                                                                                                                                                                                                                                                                                                                                                                                                                                                                                                                                                                                                | 0.74834  | 0.58173  |         |          |   |         |         |          |   |         |         |         |   |         |          |          |   |         |         |          |   |         |         |         |   |          |          |          |   |         |         |          |   |         |         |         |   |          |          |         |   |          |         |         |   |          |         |         |   |         |         |         |   |          |         |         |   |          |         |         |   |         |         |         |   |         |         |         |   |          |         |         |   |         |         |         |   |          |         |         |                                                                                                                                                          |                                                                                                                                                                                                                                                                                                                                                                                                                                                                                                                                                                                                                                                                                                                                                                                                                                                                                                                                                                                                                                                                                                                                                                                                                                                                                                                                                                                                                                                                                    |          |          |         |          |          |          |         |          |          |          |          |          |          |          |         |          |          |          |         |          |          |          |         |          |          |          |          |          |          |          |         |          |          |          |         |          |          |          |          |          |         |         |                                                                                                                                                         |                                                                                                                                                                                                                                                                                                                                                                                                                                                                                                                                                                                                                                                                                                                                                                                                                                                                                                                                                                                                                                                                                                                                                                                                                                                                                                                                                                                                                                                                                                                                                                                                                                                                                                                                                                                                                                                                                                                                                                                                                                                                                                                                                                                                                                                                                               |   |         |          |          |   |         |          |          |   |         |          |          |   |         |          |          |   |         |          |          |   |         |          |          |   |          |          |          |   |         |          |          |   |         |          |          |   |          |          |          |   |         |         |         |   |          |         |         |   |         |         |         |   |          |         |         |   |          |         |         |   |         |         |         |   |         |          |         |   |          |         |         |   |         |         |         |   |          |         |         |   |          |          |          |   |          |          |          |   |          |          |          |   |          |          |          |   |          |          |          |   |          |          |          |   |          |         |          |   |          |         |          |   |          |         |          |   |          |         |          |    |          |         |         |
| C                                                                                                                                                       | 0.31161                                                                                                                                                                                                                                                                                                                                                                                                                                                                                                                                                                                                                                                                                                                                                                                                                                                                                                                                                                                                                                                                                                                                                                                                                                                                                                                                                                                                                                                                                                                                                                                                                                                                                                                                                                                                                                                                                                                                                                                                                                                                                                                                                                                                                                                                                | -0.54087 | -1.48123 |         |          |   |         |         |          |   |         |         |         |   |         |          |          |   |         |         |          |   |         |         |         |   |          |          |          |   |         |         |          |   |         |         |         |   |          |          |         |   |          |         |         |   |          |         |         |   |         |         |         |   |          |         |         |   |          |         |         |   |         |         |         |   |         |         |         |   |          |         |         |   |         |         |         |   |          |         |         |                                                                                                                                                          |                                                                                                                                                                                                                                                                                                                                                                                                                                                                                                                                                                                                                                                                                                                                                                                                                                                                                                                                                                                                                                                                                                                                                                                                                                                                                                                                                                                                                                                                                    |          |          |         |          |          |          |         |          |          |          |          |          |          |          |         |          |          |          |         |          |          |          |         |          |          |          |          |          |          |          |         |          |          |          |         |          |          |          |          |          |         |         |                                                                                                                                                         |                                                                                                                                                                                                                                                                                                                                                                                                                                                                                                                                                                                                                                                                                                                                                                                                                                                                                                                                                                                                                                                                                                                                                                                                                                                                                                                                                                                                                                                                                                                                                                                                                                                                                                                                                                                                                                                                                                                                                                                                                                                                                                                                                                                                                                                                                               |   |         |          |          |   |         |          |          |   |         |          |          |   |         |          |          |   |         |          |          |   |         |          |          |   |          |          |          |   |         |          |          |   |         |          |          |   |          |          |          |   |         |         |         |   |          |         |         |   |         |         |         |   |          |         |         |   |          |         |         |   |         |         |         |   |         |          |         |   |          |         |         |   |         |         |         |   |          |         |         |   |          |          |          |   |          |          |          |   |          |          |          |   |          |          |          |   |          |          |          |   |          |          |          |   |          |         |          |   |          |         |          |   |          |         |          |   |          |         |          |    |          |         |         |
| C                                                                                                                                                       | 1.59769                                                                                                                                                                                                                                                                                                                                                                                                                                                                                                                                                                                                                                                                                                                                                                                                                                                                                                                                                                                                                                                                                                                                                                                                                                                                                                                                                                                                                                                                                                                                                                                                                                                                                                                                                                                                                                                                                                                                                                                                                                                                                                                                                                                                                                                                                | 1.50100  | -1.28864 |         |          |   |         |         |          |   |         |         |         |   |         |          |          |   |         |         |          |   |         |         |         |   |          |          |          |   |         |         |          |   |         |         |         |   |          |          |         |   |          |         |         |   |          |         |         |   |         |         |         |   |          |         |         |   |          |         |         |   |         |         |         |   |         |         |         |   |          |         |         |   |         |         |         |   |          |         |         |                                                                                                                                                          |                                                                                                                                                                                                                                                                                                                                                                                                                                                                                                                                                                                                                                                                                                                                                                                                                                                                                                                                                                                                                                                                                                                                                                                                                                                                                                                                                                                                                                                                                    |          |          |         |          |          |          |         |          |          |          |          |          |          |          |         |          |          |          |         |          |          |          |         |          |          |          |          |          |          |          |         |          |          |          |         |          |          |          |          |          |         |         |                                                                                                                                                         |                                                                                                                                                                                                                                                                                                                                                                                                                                                                                                                                                                                                                                                                                                                                                                                                                                                                                                                                                                                                                                                                                                                                                                                                                                                                                                                                                                                                                                                                                                                                                                                                                                                                                                                                                                                                                                                                                                                                                                                                                                                                                                                                                                                                                                                                                               |   |         |          |          |   |         |          |          |   |         |          |          |   |         |          |          |   |         |          |          |   |         |          |          |   |          |          |          |   |         |          |          |   |         |          |          |   |          |          |          |   |         |         |         |   |          |         |         |   |         |         |         |   |          |         |         |   |          |         |         |   |         |         |         |   |         |          |         |   |          |         |         |   |         |         |         |   |          |         |         |   |          |          |          |   |          |          |          |   |          |          |          |   |          |          |          |   |          |          |          |   |          |          |          |   |          |         |          |   |          |         |          |   |          |         |          |   |          |         |          |    |          |         |         |
| C                                                                                                                                                       | 1.14871                                                                                                                                                                                                                                                                                                                                                                                                                                                                                                                                                                                                                                                                                                                                                                                                                                                                                                                                                                                                                                                                                                                                                                                                                                                                                                                                                                                                                                                                                                                                                                                                                                                                                                                                                                                                                                                                                                                                                                                                                                                                                                                                                                                                                                                                                | 1.67482  | 0.01408  |         |          |   |         |         |          |   |         |         |         |   |         |          |          |   |         |         |          |   |         |         |         |   |          |          |          |   |         |         |          |   |         |         |         |   |          |          |         |   |          |         |         |   |          |         |         |   |         |         |         |   |          |         |         |   |          |         |         |   |         |         |         |   |         |         |         |   |          |         |         |   |         |         |         |   |          |         |         |                                                                                                                                                          |                                                                                                                                                                                                                                                                                                                                                                                                                                                                                                                                                                                                                                                                                                                                                                                                                                                                                                                                                                                                                                                                                                                                                                                                                                                                                                                                                                                                                                                                                    |          |          |         |          |          |          |         |          |          |          |          |          |          |          |         |          |          |          |         |          |          |          |         |          |          |          |          |          |          |          |         |          |          |          |         |          |          |          |          |          |         |         |                                                                                                                                                         |                                                                                                                                                                                                                                                                                                                                                                                                                                                                                                                                                                                                                                                                                                                                                                                                                                                                                                                                                                                                                                                                                                                                                                                                                                                                                                                                                                                                                                                                                                                                                                                                                                                                                                                                                                                                                                                                                                                                                                                                                                                                                                                                                                                                                                                                                               |   |         |          |          |   |         |          |          |   |         |          |          |   |         |          |          |   |         |          |          |   |         |          |          |   |          |          |          |   |         |          |          |   |         |          |          |   |          |          |          |   |         |         |         |   |          |         |         |   |         |         |         |   |          |         |         |   |          |         |         |   |         |         |         |   |         |          |         |   |          |         |         |   |         |         |         |   |          |         |         |   |          |          |          |   |          |          |          |   |          |          |          |   |          |          |          |   |          |          |          |   |          |          |          |   |          |         |          |   |          |         |          |   |          |         |          |   |          |         |          |    |          |         |         |
| C                                                                                                                                                       | -0.13077                                                                                                                                                                                                                                                                                                                                                                                                                                                                                                                                                                                                                                                                                                                                                                                                                                                                                                                                                                                                                                                                                                                                                                                                                                                                                                                                                                                                                                                                                                                                                                                                                                                                                                                                                                                                                                                                                                                                                                                                                                                                                                                                                                                                                                                                               | -0.35271 | -0.17296 |         |          |   |         |         |          |   |         |         |         |   |         |          |          |   |         |         |          |   |         |         |         |   |          |          |          |   |         |         |          |   |         |         |         |   |          |          |         |   |          |         |         |   |          |         |         |   |         |         |         |   |          |         |         |   |          |         |         |   |         |         |         |   |         |         |         |   |          |         |         |   |         |         |         |   |          |         |         |                                                                                                                                                          |                                                                                                                                                                                                                                                                                                                                                                                                                                                                                                                                                                                                                                                                                                                                                                                                                                                                                                                                                                                                                                                                                                                                                                                                                                                                                                                                                                                                                                                                                    |          |          |         |          |          |          |         |          |          |          |          |          |          |          |         |          |          |          |         |          |          |          |         |          |          |          |          |          |          |          |         |          |          |          |         |          |          |          |          |          |         |         |                                                                                                                                                         |                                                                                                                                                                                                                                                                                                                                                                                                                                                                                                                                                                                                                                                                                                                                                                                                                                                                                                                                                                                                                                                                                                                                                                                                                                                                                                                                                                                                                                                                                                                                                                                                                                                                                                                                                                                                                                                                                                                                                                                                                                                                                                                                                                                                                                                                                               |   |         |          |          |   |         |          |          |   |         |          |          |   |         |          |          |   |         |          |          |   |         |          |          |   |          |          |          |   |         |          |          |   |         |          |          |   |          |          |          |   |         |         |         |   |          |         |         |   |         |         |         |   |          |         |         |   |          |         |         |   |         |         |         |   |         |          |         |   |          |         |         |   |         |         |         |   |          |         |         |   |          |          |          |   |          |          |          |   |          |          |          |   |          |          |          |   |          |          |          |   |          |          |          |   |          |         |          |   |          |         |          |   |          |         |          |   |          |         |          |    |          |         |         |
| H                                                                                                                                                       | 2.27047                                                                                                                                                                                                                                                                                                                                                                                                                                                                                                                                                                                                                                                                                                                                                                                                                                                                                                                                                                                                                                                                                                                                                                                                                                                                                                                                                                                                                                                                                                                                                                                                                                                                                                                                                                                                                                                                                                                                                                                                                                                                                                                                                                                                                                                                                | 2.22619  | -1.72812 |         |          |   |         |         |          |   |         |         |         |   |         |          |          |   |         |         |          |   |         |         |         |   |          |          |          |   |         |         |          |   |         |         |         |   |          |          |         |   |          |         |         |   |          |         |         |   |         |         |         |   |          |         |         |   |          |         |         |   |         |         |         |   |         |         |         |   |          |         |         |   |         |         |         |   |          |         |         |                                                                                                                                                          |                                                                                                                                                                                                                                                                                                                                                                                                                                                                                                                                                                                                                                                                                                                                                                                                                                                                                                                                                                                                                                                                                                                                                                                                                                                                                                                                                                                                                                                                                    |          |          |         |          |          |          |         |          |          |          |          |          |          |          |         |          |          |          |         |          |          |          |         |          |          |          |          |          |          |          |         |          |          |          |         |          |          |          |          |          |         |         |                                                                                                                                                         |                                                                                                                                                                                                                                                                                                                                                                                                                                                                                                                                                                                                                                                                                                                                                                                                                                                                                                                                                                                                                                                                                                                                                                                                                                                                                                                                                                                                                                                                                                                                                                                                                                                                                                                                                                                                                                                                                                                                                                                                                                                                                                                                                                                                                                                                                               |   |         |          |          |   |         |          |          |   |         |          |          |   |         |          |          |   |         |          |          |   |         |          |          |   |          |          |          |   |         |          |          |   |         |          |          |   |          |          |          |   |         |         |         |   |          |         |         |   |         |         |         |   |          |         |         |   |          |         |         |   |         |         |         |   |         |          |         |   |          |         |         |   |         |         |         |   |          |         |         |   |          |          |          |   |          |          |          |   |          |          |          |   |          |          |          |   |          |          |          |   |          |          |          |   |          |         |          |   |          |         |          |   |          |         |          |   |          |         |          |    |          |         |         |
| H                                                                                                                                                       | 1.46302                                                                                                                                                                                                                                                                                                                                                                                                                                                                                                                                                                                                                                                                                                                                                                                                                                                                                                                                                                                                                                                                                                                                                                                                                                                                                                                                                                                                                                                                                                                                                                                                                                                                                                                                                                                                                                                                                                                                                                                                                                                                                                                                                                                                                                                                                | 2.53380  | 0.59237  |         |          |   |         |         |          |   |         |         |         |   |         |          |          |   |         |         |          |   |         |         |         |   |          |          |          |   |         |         |          |   |         |         |         |   |          |          |         |   |          |         |         |   |          |         |         |   |         |         |         |   |          |         |         |   |          |         |         |   |         |         |         |   |         |         |         |   |          |         |         |   |         |         |         |   |          |         |         |                                                                                                                                                          |                                                                                                                                                                                                                                                                                                                                                                                                                                                                                                                                                                                                                                                                                                                                                                                                                                                                                                                                                                                                                                                                                                                                                                                                                                                                                                                                                                                                                                                                                    |          |          |         |          |          |          |         |          |          |          |          |          |          |          |         |          |          |          |         |          |          |          |         |          |          |          |          |          |          |          |         |          |          |          |         |          |          |          |          |          |         |         |                                                                                                                                                         |                                                                                                                                                                                                                                                                                                                                                                                                                                                                                                                                                                                                                                                                                                                                                                                                                                                                                                                                                                                                                                                                                                                                                                                                                                                                                                                                                                                                                                                                                                                                                                                                                                                                                                                                                                                                                                                                                                                                                                                                                                                                                                                                                                                                                                                                                               |   |         |          |          |   |         |          |          |   |         |          |          |   |         |          |          |   |         |          |          |   |         |          |          |   |          |          |          |   |         |          |          |   |         |          |          |   |          |          |          |   |         |         |         |   |          |         |         |   |         |         |         |   |          |         |         |   |          |         |         |   |         |         |         |   |         |          |         |   |          |         |         |   |         |         |         |   |          |         |         |   |          |          |          |   |          |          |          |   |          |          |          |   |          |          |          |   |          |          |          |   |          |          |          |   |          |         |          |   |          |         |          |   |          |         |          |   |          |         |          |    |          |         |         |
| H                                                                                                                                                       | -0.79990                                                                                                                                                                                                                                                                                                                                                                                                                                                                                                                                                                                                                                                                                                                                                                                                                                                                                                                                                                                                                                                                                                                                                                                                                                                                                                                                                                                                                                                                                                                                                                                                                                                                                                                                                                                                                                                                                                                                                                                                                                                                                                                                                                                                                                                                               | -1.07778 | 0.26998  |         |          |   |         |         |          |   |         |         |         |   |         |          |          |   |         |         |          |   |         |         |         |   |          |          |          |   |         |         |          |   |         |         |         |   |          |          |         |   |          |         |         |   |          |         |         |   |         |         |         |   |          |         |         |   |          |         |         |   |         |         |         |   |         |         |         |   |          |         |         |   |         |         |         |   |          |         |         |                                                                                                                                                          |                                                                                                                                                                                                                                                                                                                                                                                                                                                                                                                                                                                                                                                                                                                                                                                                                                                                                                                                                                                                                                                                                                                                                                                                                                                                                                                                                                                                                                                                                    |          |          |         |          |          |          |         |          |          |          |          |          |          |          |         |          |          |          |         |          |          |          |         |          |          |          |          |          |          |          |         |          |          |          |         |          |          |          |          |          |         |         |                                                                                                                                                         |                                                                                                                                                                                                                                                                                                                                                                                                                                                                                                                                                                                                                                                                                                                                                                                                                                                                                                                                                                                                                                                                                                                                                                                                                                                                                                                                                                                                                                                                                                                                                                                                                                                                                                                                                                                                                                                                                                                                                                                                                                                                                                                                                                                                                                                                                               |   |         |          |          |   |         |          |          |   |         |          |          |   |         |          |          |   |         |          |          |   |         |          |          |   |          |          |          |   |         |          |          |   |         |          |          |   |          |          |          |   |         |         |         |   |          |         |         |   |         |         |         |   |          |         |         |   |          |         |         |   |         |         |         |   |         |          |         |   |          |         |         |   |         |         |         |   |          |         |         |   |          |          |          |   |          |          |          |   |          |          |          |   |          |          |          |   |          |          |          |   |          |          |          |   |          |         |          |   |          |         |          |   |          |         |          |   |          |         |          |    |          |         |         |
| C                                                                                                                                                       | -0.18601                                                                                                                                                                                                                                                                                                                                                                                                                                                                                                                                                                                                                                                                                                                                                                                                                                                                                                                                                                                                                                                                                                                                                                                                                                                                                                                                                                                                                                                                                                                                                                                                                                                                                                                                                                                                                                                                                                                                                                                                                                                                                                                                                                                                                                                                               | 0.92169  | 1.98228  |         |          |   |         |         |          |   |         |         |         |   |         |          |          |   |         |         |          |   |         |         |         |   |          |          |          |   |         |         |          |   |         |         |         |   |          |          |         |   |          |         |         |   |          |         |         |   |         |         |         |   |          |         |         |   |          |         |         |   |         |         |         |   |         |         |         |   |          |         |         |   |         |         |         |   |          |         |         |                                                                                                                                                          |                                                                                                                                                                                                                                                                                                                                                                                                                                                                                                                                                                                                                                                                                                                                                                                                                                                                                                                                                                                                                                                                                                                                                                                                                                                                                                                                                                                                                                                                                    |          |          |         |          |          |          |         |          |          |          |          |          |          |          |         |          |          |          |         |          |          |          |         |          |          |          |          |          |          |          |         |          |          |          |         |          |          |          |          |          |         |         |                                                                                                                                                         |                                                                                                                                                                                                                                                                                                                                                                                                                                                                                                                                                                                                                                                                                                                                                                                                                                                                                                                                                                                                                                                                                                                                                                                                                                                                                                                                                                                                                                                                                                                                                                                                                                                                                                                                                                                                                                                                                                                                                                                                                                                                                                                                                                                                                                                                                               |   |         |          |          |   |         |          |          |   |         |          |          |   |         |          |          |   |         |          |          |   |         |          |          |   |          |          |          |   |         |          |          |   |         |          |          |   |          |          |          |   |         |         |         |   |          |         |         |   |         |         |         |   |          |         |         |   |          |         |         |   |         |         |         |   |         |          |         |   |          |         |         |   |         |         |         |   |          |         |         |   |          |          |          |   |          |          |          |   |          |          |          |   |          |          |          |   |          |          |          |   |          |          |          |   |          |         |          |   |          |         |          |   |          |         |          |   |          |         |          |    |          |         |         |
| C                                                                                                                                                       | -0.88257                                                                                                                                                                                                                                                                                                                                                                                                                                                                                                                                                                                                                                                                                                                                                                                                                                                                                                                                                                                                                                                                                                                                                                                                                                                                                                                                                                                                                                                                                                                                                                                                                                                                                                                                                                                                                                                                                                                                                                                                                                                                                                                                                                                                                                                                               | 1.22830  | 4.69573  |         |          |   |         |         |          |   |         |         |         |   |         |          |          |   |         |         |          |   |         |         |         |   |          |          |          |   |         |         |          |   |         |         |         |   |          |          |         |   |          |         |         |   |          |         |         |   |         |         |         |   |          |         |         |   |          |         |         |   |         |         |         |   |         |         |         |   |          |         |         |   |         |         |         |   |          |         |         |                                                                                                                                                          |                                                                                                                                                                                                                                                                                                                                                                                                                                                                                                                                                                                                                                                                                                                                                                                                                                                                                                                                                                                                                                                                                                                                                                                                                                                                                                                                                                                                                                                                                    |          |          |         |          |          |          |         |          |          |          |          |          |          |          |         |          |          |          |         |          |          |          |         |          |          |          |          |          |          |          |         |          |          |          |         |          |          |          |          |          |         |         |                                                                                                                                                         |                                                                                                                                                                                                                                                                                                                                                                                                                                                                                                                                                                                                                                                                                                                                                                                                                                                                                                                                                                                                                                                                                                                                                                                                                                                                                                                                                                                                                                                                                                                                                                                                                                                                                                                                                                                                                                                                                                                                                                                                                                                                                                                                                                                                                                                                                               |   |         |          |          |   |         |          |          |   |         |          |          |   |         |          |          |   |         |          |          |   |         |          |          |   |          |          |          |   |         |          |          |   |         |          |          |   |          |          |          |   |         |         |         |   |          |         |         |   |         |         |         |   |          |         |         |   |          |         |         |   |         |         |         |   |         |          |         |   |          |         |         |   |         |         |         |   |          |         |         |   |          |          |          |   |          |          |          |   |          |          |          |   |          |          |          |   |          |          |          |   |          |          |          |   |          |         |          |   |          |         |          |   |          |         |          |   |          |         |          |    |          |         |         |
| C                                                                                                                                                       | 0.78924                                                                                                                                                                                                                                                                                                                                                                                                                                                                                                                                                                                                                                                                                                                                                                                                                                                                                                                                                                                                                                                                                                                                                                                                                                                                                                                                                                                                                                                                                                                                                                                                                                                                                                                                                                                                                                                                                                                                                                                                                                                                                                                                                                                                                                                                                | 1.03768  | 2.98339  |         |          |   |         |         |          |   |         |         |         |   |         |          |          |   |         |         |          |   |         |         |         |   |          |          |          |   |         |         |          |   |         |         |         |   |          |          |         |   |          |         |         |   |          |         |         |   |         |         |         |   |          |         |         |   |          |         |         |   |         |         |         |   |         |         |         |   |          |         |         |   |         |         |         |   |          |         |         |                                                                                                                                                          |                                                                                                                                                                                                                                                                                                                                                                                                                                                                                                                                                                                                                                                                                                                                                                                                                                                                                                                                                                                                                                                                                                                                                                                                                                                                                                                                                                                                                                                                                    |          |          |         |          |          |          |         |          |          |          |          |          |          |          |         |          |          |          |         |          |          |          |         |          |          |          |          |          |          |          |         |          |          |          |         |          |          |          |          |          |         |         |                                                                                                                                                         |                                                                                                                                                                                                                                                                                                                                                                                                                                                                                                                                                                                                                                                                                                                                                                                                                                                                                                                                                                                                                                                                                                                                                                                                                                                                                                                                                                                                                                                                                                                                                                                                                                                                                                                                                                                                                                                                                                                                                                                                                                                                                                                                                                                                                                                                                               |   |         |          |          |   |         |          |          |   |         |          |          |   |         |          |          |   |         |          |          |   |         |          |          |   |          |          |          |   |         |          |          |   |         |          |          |   |          |          |          |   |         |         |         |   |          |         |         |   |         |         |         |   |          |         |         |   |          |         |         |   |         |         |         |   |         |          |         |   |          |         |         |   |         |         |         |   |          |         |         |   |          |          |          |   |          |          |          |   |          |          |          |   |          |          |          |   |          |          |          |   |          |          |          |   |          |         |          |   |          |         |          |   |          |         |          |   |          |         |          |    |          |         |         |
| C                                                                                                                                                       | -1.52789                                                                                                                                                                                                                                                                                                                                                                                                                                                                                                                                                                                                                                                                                                                                                                                                                                                                                                                                                                                                                                                                                                                                                                                                                                                                                                                                                                                                                                                                                                                                                                                                                                                                                                                                                                                                                                                                                                                                                                                                                                                                                                                                                                                                                                                                               | 0.98129  | 2.38464  |         |          |   |         |         |          |   |         |         |         |   |         |          |          |   |         |         |          |   |         |         |         |   |          |          |          |   |         |         |          |   |         |         |         |   |          |          |         |   |          |         |         |   |          |         |         |   |         |         |         |   |          |         |         |   |          |         |         |   |         |         |         |   |         |         |         |   |          |         |         |   |         |         |         |   |          |         |         |                                                                                                                                                          |                                                                                                                                                                                                                                                                                                                                                                                                                                                                                                                                                                                                                                                                                                                                                                                                                                                                                                                                                                                                                                                                                                                                                                                                                                                                                                                                                                                                                                                                                    |          |          |         |          |          |          |         |          |          |          |          |          |          |          |         |          |          |          |         |          |          |          |         |          |          |          |          |          |          |          |         |          |          |          |         |          |          |          |          |          |         |         |                                                                                                                                                         |                                                                                                                                                                                                                                                                                                                                                                                                                                                                                                                                                                                                                                                                                                                                                                                                                                                                                                                                                                                                                                                                                                                                                                                                                                                                                                                                                                                                                                                                                                                                                                                                                                                                                                                                                                                                                                                                                                                                                                                                                                                                                                                                                                                                                                                                                               |   |         |          |          |   |         |          |          |   |         |          |          |   |         |          |          |   |         |          |          |   |         |          |          |   |          |          |          |   |         |          |          |   |         |          |          |   |          |          |          |   |         |         |         |   |          |         |         |   |         |         |         |   |          |         |         |   |          |         |         |   |         |         |         |   |         |          |         |   |          |         |         |   |         |         |         |   |          |         |         |   |          |          |          |   |          |          |          |   |          |          |          |   |          |          |          |   |          |          |          |   |          |          |          |   |          |         |          |   |          |         |          |   |          |         |          |   |          |         |          |    |          |         |         |
| C                                                                                                                                                       | -1.87345                                                                                                                                                                                                                                                                                                                                                                                                                                                                                                                                                                                                                                                                                                                                                                                                                                                                                                                                                                                                                                                                                                                                                                                                                                                                                                                                                                                                                                                                                                                                                                                                                                                                                                                                                                                                                                                                                                                                                                                                                                                                                                                                                                                                                                                                               | 1.12898  | 3.72655  |         |          |   |         |         |          |   |         |         |         |   |         |          |          |   |         |         |          |   |         |         |         |   |          |          |          |   |         |         |          |   |         |         |         |   |          |          |         |   |          |         |         |   |          |         |         |   |         |         |         |   |          |         |         |   |          |         |         |   |         |         |         |   |         |         |         |   |          |         |         |   |         |         |         |   |          |         |         |                                                                                                                                                          |                                                                                                                                                                                                                                                                                                                                                                                                                                                                                                                                                                                                                                                                                                                                                                                                                                                                                                                                                                                                                                                                                                                                                                                                                                                                                                                                                                                                                                                                                    |          |          |         |          |          |          |         |          |          |          |          |          |          |          |         |          |          |          |         |          |          |          |         |          |          |          |          |          |          |          |         |          |          |          |         |          |          |          |          |          |         |         |                                                                                                                                                         |                                                                                                                                                                                                                                                                                                                                                                                                                                                                                                                                                                                                                                                                                                                                                                                                                                                                                                                                                                                                                                                                                                                                                                                                                                                                                                                                                                                                                                                                                                                                                                                                                                                                                                                                                                                                                                                                                                                                                                                                                                                                                                                                                                                                                                                                                               |   |         |          |          |   |         |          |          |   |         |          |          |   |         |          |          |   |         |          |          |   |         |          |          |   |          |          |          |   |         |          |          |   |         |          |          |   |          |          |          |   |         |         |         |   |          |         |         |   |         |         |         |   |          |         |         |   |          |         |         |   |         |         |         |   |         |          |         |   |          |         |         |   |         |         |         |   |          |         |         |   |          |          |          |   |          |          |          |   |          |          |          |   |          |          |          |   |          |          |          |   |          |          |          |   |          |         |          |   |          |         |          |   |          |         |          |   |          |         |          |    |          |         |         |
| C                                                                                                                                                       | 0.45556                                                                                                                                                                                                                                                                                                                                                                                                                                                                                                                                                                                                                                                                                                                                                                                                                                                                                                                                                                                                                                                                                                                                                                                                                                                                                                                                                                                                                                                                                                                                                                                                                                                                                                                                                                                                                                                                                                                                                                                                                                                                                                                                                                                                                                                                                | 1.18851  | 4.32129  |         |          |   |         |         |          |   |         |         |         |   |         |          |          |   |         |         |          |   |         |         |         |   |          |          |          |   |         |         |          |   |         |         |         |   |          |          |         |   |          |         |         |   |          |         |         |   |         |         |         |   |          |         |         |   |          |         |         |   |         |         |         |   |         |         |         |   |          |         |         |   |         |         |         |   |          |         |         |                                                                                                                                                          |                                                                                                                                                                                                                                                                                                                                                                                                                                                                                                                                                                                                                                                                                                                                                                                                                                                                                                                                                                                                                                                                                                                                                                                                                                                                                                                                                                                                                                                                                    |          |          |         |          |          |          |         |          |          |          |          |          |          |          |         |          |          |          |         |          |          |          |         |          |          |          |          |          |          |          |         |          |          |          |         |          |          |          |          |          |         |         |                                                                                                                                                         |                                                                                                                                                                                                                                                                                                                                                                                                                                                                                                                                                                                                                                                                                                                                                                                                                                                                                                                                                                                                                                                                                                                                                                                                                                                                                                                                                                                                                                                                                                                                                                                                                                                                                                                                                                                                                                                                                                                                                                                                                                                                                                                                                                                                                                                                                               |   |         |          |          |   |         |          |          |   |         |          |          |   |         |          |          |   |         |          |          |   |         |          |          |   |          |          |          |   |         |          |          |   |         |          |          |   |          |          |          |   |         |         |         |   |          |         |         |   |         |         |         |   |          |         |         |   |          |         |         |   |         |         |         |   |         |          |         |   |          |         |         |   |         |         |         |   |          |         |         |   |          |          |          |   |          |          |          |   |          |          |          |   |          |          |          |   |          |          |          |   |          |          |          |   |          |         |          |   |          |         |          |   |          |         |          |   |          |         |          |    |          |         |         |
| H                                                                                                                                                       | 1.82865                                                                                                                                                                                                                                                                                                                                                                                                                                                                                                                                                                                                                                                                                                                                                                                                                                                                                                                                                                                                                                                                                                                                                                                                                                                                                                                                                                                                                                                                                                                                                                                                                                                                                                                                                                                                                                                                                                                                                                                                                                                                                                                                                                                                                                                                                | 0.99045  | 2.68612  |         |          |   |         |         |          |   |         |         |         |   |         |          |          |   |         |         |          |   |         |         |         |   |          |          |          |   |         |         |          |   |         |         |         |   |          |          |         |   |          |         |         |   |          |         |         |   |         |         |         |   |          |         |         |   |          |         |         |   |         |         |         |   |         |         |         |   |          |         |         |   |         |         |         |   |          |         |         |                                                                                                                                                          |                                                                                                                                                                                                                                                                                                                                                                                                                                                                                                                                                                                                                                                                                                                                                                                                                                                                                                                                                                                                                                                                                                                                                                                                                                                                                                                                                                                                                                                                                    |          |          |         |          |          |          |         |          |          |          |          |          |          |          |         |          |          |          |         |          |          |          |         |          |          |          |          |          |          |          |         |          |          |          |         |          |          |          |          |          |         |         |                                                                                                                                                         |                                                                                                                                                                                                                                                                                                                                                                                                                                                                                                                                                                                                                                                                                                                                                                                                                                                                                                                                                                                                                                                                                                                                                                                                                                                                                                                                                                                                                                                                                                                                                                                                                                                                                                                                                                                                                                                                                                                                                                                                                                                                                                                                                                                                                                                                                               |   |         |          |          |   |         |          |          |   |         |          |          |   |         |          |          |   |         |          |          |   |         |          |          |   |          |          |          |   |         |          |          |   |         |          |          |   |          |          |          |   |         |         |         |   |          |         |         |   |         |         |         |   |          |         |         |   |          |         |         |   |         |         |         |   |         |          |         |   |          |         |         |   |         |         |         |   |          |         |         |   |          |          |          |   |          |          |          |   |          |          |          |   |          |          |          |   |          |          |          |   |          |          |          |   |          |         |          |   |          |         |          |   |          |         |          |   |          |         |          |    |          |         |         |
| H                                                                                                                                                       | -2.91395                                                                                                                                                                                                                                                                                                                                                                                                                                                                                                                                                                                                                                                                                                                                                                                                                                                                                                                                                                                                                                                                                                                                                                                                                                                                                                                                                                                                                                                                                                                                                                                                                                                                                                                                                                                                                                                                                                                                                                                                                                                                                                                                                                                                                                                                               | 1.17838  | 4.01418  |         |          |   |         |         |          |   |         |         |         |   |         |          |          |   |         |         |          |   |         |         |         |   |          |          |          |   |         |         |          |   |         |         |         |   |          |          |         |   |          |         |         |   |          |         |         |   |         |         |         |   |          |         |         |   |          |         |         |   |         |         |         |   |         |         |         |   |          |         |         |   |         |         |         |   |          |         |         |                                                                                                                                                          |                                                                                                                                                                                                                                                                                                                                                                                                                                                                                                                                                                                                                                                                                                                                                                                                                                                                                                                                                                                                                                                                                                                                                                                                                                                                                                                                                                                                                                                                                    |          |          |         |          |          |          |         |          |          |          |          |          |          |          |         |          |          |          |         |          |          |          |         |          |          |          |          |          |          |          |         |          |          |          |         |          |          |          |          |          |         |         |                                                                                                                                                         |                                                                                                                                                                                                                                                                                                                                                                                                                                                                                                                                                                                                                                                                                                                                                                                                                                                                                                                                                                                                                                                                                                                                                                                                                                                                                                                                                                                                                                                                                                                                                                                                                                                                                                                                                                                                                                                                                                                                                                                                                                                                                                                                                                                                                                                                                               |   |         |          |          |   |         |          |          |   |         |          |          |   |         |          |          |   |         |          |          |   |         |          |          |   |          |          |          |   |         |          |          |   |         |          |          |   |          |          |          |   |         |         |         |   |          |         |         |   |         |         |         |   |          |         |         |   |          |         |         |   |         |         |         |   |         |          |         |   |          |         |         |   |         |         |         |   |          |         |         |   |          |          |          |   |          |          |          |   |          |          |          |   |          |          |          |   |          |          |          |   |          |          |          |   |          |         |          |   |          |         |          |   |          |         |          |   |          |         |          |    |          |         |         |
| H                                                                                                                                                       | 1.23585                                                                                                                                                                                                                                                                                                                                                                                                                                                                                                                                                                                                                                                                                                                                                                                                                                                                                                                                                                                                                                                                                                                                                                                                                                                                                                                                                                                                                                                                                                                                                                                                                                                                                                                                                                                                                                                                                                                                                                                                                                                                                                                                                                                                                                                                                | 1.26806  | 5.06659  |         |          |   |         |         |          |   |         |         |         |   |         |          |          |   |         |         |          |   |         |         |         |   |          |          |          |   |         |         |          |   |         |         |         |   |          |          |         |   |          |         |         |   |          |         |         |   |         |         |         |   |          |         |         |   |          |         |         |   |         |         |         |   |         |         |         |   |          |         |         |   |         |         |         |   |          |         |         |                                                                                                                                                          |                                                                                                                                                                                                                                                                                                                                                                                                                                                                                                                                                                                                                                                                                                                                                                                                                                                                                                                                                                                                                                                                                                                                                                                                                                                                                                                                                                                                                                                                                    |          |          |         |          |          |          |         |          |          |          |          |          |          |          |         |          |          |          |         |          |          |          |         |          |          |          |          |          |          |          |         |          |          |          |         |          |          |          |          |          |         |         |                                                                                                                                                         |                                                                                                                                                                                                                                                                                                                                                                                                                                                                                                                                                                                                                                                                                                                                                                                                                                                                                                                                                                                                                                                                                                                                                                                                                                                                                                                                                                                                                                                                                                                                                                                                                                                                                                                                                                                                                                                                                                                                                                                                                                                                                                                                                                                                                                                                                               |   |         |          |          |   |         |          |          |   |         |          |          |   |         |          |          |   |         |          |          |   |         |          |          |   |          |          |          |   |         |          |          |   |         |          |          |   |          |          |          |   |         |         |         |   |          |         |         |   |         |         |         |   |          |         |         |   |          |         |         |   |         |         |         |   |         |          |         |   |          |         |         |   |         |         |         |   |          |         |         |   |          |          |          |   |          |          |          |   |          |          |          |   |          |          |          |   |          |          |          |   |          |          |          |   |          |         |          |   |          |         |          |   |          |         |          |   |          |         |          |    |          |         |         |
| H                                                                                                                                                       | -1.16175                                                                                                                                                                                                                                                                                                                                                                                                                                                                                                                                                                                                                                                                                                                                                                                                                                                                                                                                                                                                                                                                                                                                                                                                                                                                                                                                                                                                                                                                                                                                                                                                                                                                                                                                                                                                                                                                                                                                                                                                                                                                                                                                                                                                                                                                               | 1.34249  | 5.73489  |         |          |   |         |         |          |   |         |         |         |   |         |          |          |   |         |         |          |   |         |         |         |   |          |          |          |   |         |         |          |   |         |         |         |   |          |          |         |   |          |         |         |   |          |         |         |   |         |         |         |   |          |         |         |   |          |         |         |   |         |         |         |   |         |         |         |   |          |         |         |   |         |         |         |   |          |         |         |                                                                                                                                                          |                                                                                                                                                                                                                                                                                                                                                                                                                                                                                                                                                                                                                                                                                                                                                                                                                                                                                                                                                                                                                                                                                                                                                                                                                                                                                                                                                                                                                                                                                    |          |          |         |          |          |          |         |          |          |          |          |          |          |          |         |          |          |          |         |          |          |          |         |          |          |          |          |          |          |          |         |          |          |          |         |          |          |          |          |          |         |         |                                                                                                                                                         |                                                                                                                                                                                                                                                                                                                                                                                                                                                                                                                                                                                                                                                                                                                                                                                                                                                                                                                                                                                                                                                                                                                                                                                                                                                                                                                                                                                                                                                                                                                                                                                                                                                                                                                                                                                                                                                                                                                                                                                                                                                                                                                                                                                                                                                                                               |   |         |          |          |   |         |          |          |   |         |          |          |   |         |          |          |   |         |          |          |   |         |          |          |   |          |          |          |   |         |          |          |   |         |          |          |   |          |          |          |   |         |         |         |   |          |         |         |   |         |         |         |   |          |         |         |   |          |         |         |   |         |         |         |   |         |          |         |   |          |         |         |   |         |         |         |   |          |         |         |   |          |          |          |   |          |          |          |   |          |          |          |   |          |          |          |   |          |          |          |   |          |          |          |   |          |         |          |   |          |         |          |   |          |         |          |   |          |         |          |    |          |         |         |
| H                                                                                                                                                       | 1.69176                                                                                                                                                                                                                                                                                                                                                                                                                                                                                                                                                                                                                                                                                                                                                                                                                                                                                                                                                                                                                                                                                                                                                                                                                                                                                                                                                                                                                                                                                                                                                                                                                                                                                                                                                                                                                                                                                                                                                                                                                                                                                                                                                                                                                                                                                | 0.00544  | -4.68808 |         |          |   |         |         |          |   |         |         |         |   |         |          |          |   |         |         |          |   |         |         |         |   |          |          |          |   |         |         |          |   |         |         |         |   |          |          |         |   |          |         |         |   |          |         |         |   |         |         |         |   |          |         |         |   |          |         |         |   |         |         |         |   |         |         |         |   |          |         |         |   |         |         |         |   |          |         |         |                                                                                                                                                          |                                                                                                                                                                                                                                                                                                                                                                                                                                                                                                                                                                                                                                                                                                                                                                                                                                                                                                                                                                                                                                                                                                                                                                                                                                                                                                                                                                                                                                                                                    |          |          |         |          |          |          |         |          |          |          |          |          |          |          |         |          |          |          |         |          |          |          |         |          |          |          |          |          |          |          |         |          |          |          |         |          |          |          |          |          |         |         |                                                                                                                                                         |                                                                                                                                                                                                                                                                                                                                                                                                                                                                                                                                                                                                                                                                                                                                                                                                                                                                                                                                                                                                                                                                                                                                                                                                                                                                                                                                                                                                                                                                                                                                                                                                                                                                                                                                                                                                                                                                                                                                                                                                                                                                                                                                                                                                                                                                                               |   |         |          |          |   |         |          |          |   |         |          |          |   |         |          |          |   |         |          |          |   |         |          |          |   |          |          |          |   |         |          |          |   |         |          |          |   |          |          |          |   |         |         |         |   |          |         |         |   |         |         |         |   |          |         |         |   |          |         |         |   |         |         |         |   |         |          |         |   |          |         |         |   |         |         |         |   |          |         |         |   |          |          |          |   |          |          |          |   |          |          |          |   |          |          |          |   |          |          |          |   |          |          |          |   |          |         |          |   |          |         |          |   |          |         |          |   |          |         |          |    |          |         |         |
| C                                                                                                                                                       | 1.66914                                                                                                                                                                                                                                                                                                                                                                                                                                                                                                                                                                                                                                                                                                                                                                                                                                                                                                                                                                                                                                                                                                                                                                                                                                                                                                                                                                                                                                                                                                                                                                                                                                                                                                                                                                                                                                                                                                                                                                                                                                                                                                                                                                                                                                                                                | 0.00386  | -3.60510 |         |          |   |         |         |          |   |         |         |         |   |         |          |          |   |         |         |          |   |         |         |         |   |          |          |          |   |         |         |          |   |         |         |         |   |          |          |         |   |          |         |         |   |          |         |         |   |         |         |         |   |          |         |         |   |          |         |         |   |         |         |         |   |         |         |         |   |          |         |         |   |         |         |         |   |          |         |         |                                                                                                                                                          |                                                                                                                                                                                                                                                                                                                                                                                                                                                                                                                                                                                                                                                                                                                                                                                                                                                                                                                                                                                                                                                                                                                                                                                                                                                                                                                                                                                                                                                                                    |          |          |         |          |          |          |         |          |          |          |          |          |          |          |         |          |          |          |         |          |          |          |         |          |          |          |          |          |          |          |         |          |          |          |         |          |          |          |          |          |         |         |                                                                                                                                                         |                                                                                                                                                                                                                                                                                                                                                                                                                                                                                                                                                                                                                                                                                                                                                                                                                                                                                                                                                                                                                                                                                                                                                                                                                                                                                                                                                                                                                                                                                                                                                                                                                                                                                                                                                                                                                                                                                                                                                                                                                                                                                                                                                                                                                                                                                               |   |         |          |          |   |         |          |          |   |         |          |          |   |         |          |          |   |         |          |          |   |         |          |          |   |          |          |          |   |         |          |          |   |         |          |          |   |          |          |          |   |         |         |         |   |          |         |         |   |         |         |         |   |          |         |         |   |          |         |         |   |         |         |         |   |         |          |         |   |          |         |         |   |         |         |         |   |          |         |         |   |          |          |          |   |          |          |          |   |          |          |          |   |          |          |          |   |          |          |          |   |          |          |          |   |          |         |          |   |          |         |          |   |          |         |          |   |          |         |          |    |          |         |         |
| C                                                                                                                                                       | 1.61342                                                                                                                                                                                                                                                                                                                                                                                                                                                                                                                                                                                                                                                                                                                                                                                                                                                                                                                                                                                                                                                                                                                                                                                                                                                                                                                                                                                                                                                                                                                                                                                                                                                                                                                                                                                                                                                                                                                                                                                                                                                                                                                                                                                                                                                                                | -0.00023 | -0.76473 |         |          |   |         |         |          |   |         |         |         |   |         |          |          |   |         |         |          |   |         |         |         |   |          |          |          |   |         |         |          |   |         |         |         |   |          |          |         |   |          |         |         |   |          |         |         |   |         |         |         |   |          |         |         |   |          |         |         |   |         |         |         |   |         |         |         |   |          |         |         |   |         |         |         |   |          |         |         |                                                                                                                                                          |                                                                                                                                                                                                                                                                                                                                                                                                                                                                                                                                                                                                                                                                                                                                                                                                                                                                                                                                                                                                                                                                                                                                                                                                                                                                                                                                                                                                                                                                                    |          |          |         |          |          |          |         |          |          |          |          |          |          |          |         |          |          |          |         |          |          |          |         |          |          |          |          |          |          |          |         |          |          |          |         |          |          |          |          |          |         |         |                                                                                                                                                         |                                                                                                                                                                                                                                                                                                                                                                                                                                                                                                                                                                                                                                                                                                                                                                                                                                                                                                                                                                                                                                                                                                                                                                                                                                                                                                                                                                                                                                                                                                                                                                                                                                                                                                                                                                                                                                                                                                                                                                                                                                                                                                                                                                                                                                                                                               |   |         |          |          |   |         |          |          |   |         |          |          |   |         |          |          |   |         |          |          |   |         |          |          |   |          |          |          |   |         |          |          |   |         |          |          |   |          |          |          |   |         |         |         |   |          |         |         |   |         |         |         |   |          |         |         |   |          |         |         |   |         |         |         |   |         |          |         |   |          |         |         |   |         |         |         |   |          |         |         |   |          |          |          |   |          |          |          |   |          |          |          |   |          |          |          |   |          |          |          |   |          |          |          |   |          |         |          |   |          |         |          |   |          |         |          |   |          |         |          |    |          |         |         |
| C                                                                                                                                                       | 0.45369                                                                                                                                                                                                                                                                                                                                                                                                                                                                                                                                                                                                                                                                                                                                                                                                                                                                                                                                                                                                                                                                                                                                                                                                                                                                                                                                                                                                                                                                                                                                                                                                                                                                                                                                                                                                                                                                                                                                                                                                                                                                                                                                                                                                                                                                                | 0.00004  | -2.93557 |         |          |   |         |         |          |   |         |         |         |   |         |          |          |   |         |         |          |   |         |         |         |   |          |          |          |   |         |         |          |   |         |         |         |   |          |          |         |   |          |         |         |   |          |         |         |   |         |         |         |   |          |         |         |   |          |         |         |   |         |         |         |   |         |         |         |   |          |         |         |   |         |         |         |   |          |         |         |                                                                                                                                                          |                                                                                                                                                                                                                                                                                                                                                                                                                                                                                                                                                                                                                                                                                                                                                                                                                                                                                                                                                                                                                                                                                                                                                                                                                                                                                                                                                                                                                                                                                    |          |          |         |          |          |          |         |          |          |          |          |          |          |          |         |          |          |          |         |          |          |          |         |          |          |          |          |          |          |          |         |          |          |          |         |          |          |          |          |          |         |         |                                                                                                                                                         |                                                                                                                                                                                                                                                                                                                                                                                                                                                                                                                                                                                                                                                                                                                                                                                                                                                                                                                                                                                                                                                                                                                                                                                                                                                                                                                                                                                                                                                                                                                                                                                                                                                                                                                                                                                                                                                                                                                                                                                                                                                                                                                                                                                                                                                                                               |   |         |          |          |   |         |          |          |   |         |          |          |   |         |          |          |   |         |          |          |   |         |          |          |   |          |          |          |   |         |          |          |   |         |          |          |   |          |          |          |   |         |         |         |   |          |         |         |   |         |         |         |   |          |         |         |   |          |         |         |   |         |         |         |   |         |          |         |   |          |         |         |   |         |         |         |   |          |         |         |   |          |          |          |   |          |          |          |   |          |          |          |   |          |          |          |   |          |          |          |   |          |          |          |   |          |         |          |   |          |         |          |   |          |         |          |   |          |         |          |    |          |         |         |
| C                                                                                                                                                       | 2.85085                                                                                                                                                                                                                                                                                                                                                                                                                                                                                                                                                                                                                                                                                                                                                                                                                                                                                                                                                                                                                                                                                                                                                                                                                                                                                                                                                                                                                                                                                                                                                                                                                                                                                                                                                                                                                                                                                                                                                                                                                                                                                                                                                                                                                                                                                | 0.00562  | -2.87107 |         |          |   |         |         |          |   |         |         |         |   |         |          |          |   |         |         |          |   |         |         |         |   |          |          |          |   |         |         |          |   |         |         |         |   |          |          |         |   |          |         |         |   |          |         |         |   |         |         |         |   |          |         |         |   |          |         |         |   |         |         |         |   |         |         |         |   |          |         |         |   |         |         |         |   |          |         |         |                                                                                                                                                          |                                                                                                                                                                                                                                                                                                                                                                                                                                                                                                                                                                                                                                                                                                                                                                                                                                                                                                                                                                                                                                                                                                                                                                                                                                                                                                                                                                                                                                                                                    |          |          |         |          |          |          |         |          |          |          |          |          |          |          |         |          |          |          |         |          |          |          |         |          |          |          |          |          |          |          |         |          |          |          |         |          |          |          |          |          |         |         |                                                                                                                                                         |                                                                                                                                                                                                                                                                                                                                                                                                                                                                                                                                                                                                                                                                                                                                                                                                                                                                                                                                                                                                                                                                                                                                                                                                                                                                                                                                                                                                                                                                                                                                                                                                                                                                                                                                                                                                                                                                                                                                                                                                                                                                                                                                                                                                                                                                                               |   |         |          |          |   |         |          |          |   |         |          |          |   |         |          |          |   |         |          |          |   |         |          |          |   |          |          |          |   |         |          |          |   |         |          |          |   |          |          |          |   |         |         |         |   |          |         |         |   |         |         |         |   |          |         |         |   |          |         |         |   |         |         |         |   |         |          |         |   |          |         |         |   |         |         |         |   |          |         |         |   |          |          |          |   |          |          |          |   |          |          |          |   |          |          |          |   |          |          |          |   |          |          |          |   |          |         |          |   |          |         |          |   |          |         |          |   |          |         |          |    |          |         |         |
| C                                                                                                                                                       | 2.82656                                                                                                                                                                                                                                                                                                                                                                                                                                                                                                                                                                                                                                                                                                                                                                                                                                                                                                                                                                                                                                                                                                                                                                                                                                                                                                                                                                                                                                                                                                                                                                                                                                                                                                                                                                                                                                                                                                                                                                                                                                                                                                                                                                                                                                                                                | 0.00363  | -1.48654 |         |          |   |         |         |          |   |         |         |         |   |         |          |          |   |         |         |          |   |         |         |         |   |          |          |          |   |         |         |          |   |         |         |         |   |          |          |         |   |          |         |         |   |          |         |         |   |         |         |         |   |          |         |         |   |          |         |         |   |         |         |         |   |         |         |         |   |          |         |         |   |         |         |         |   |          |         |         |                                                                                                                                                          |                                                                                                                                                                                                                                                                                                                                                                                                                                                                                                                                                                                                                                                                                                                                                                                                                                                                                                                                                                                                                                                                                                                                                                                                                                                                                                                                                                                                                                                                                    |          |          |         |          |          |          |         |          |          |          |          |          |          |          |         |          |          |          |         |          |          |          |         |          |          |          |          |          |          |          |         |          |          |          |         |          |          |          |          |          |         |         |                                                                                                                                                         |                                                                                                                                                                                                                                                                                                                                                                                                                                                                                                                                                                                                                                                                                                                                                                                                                                                                                                                                                                                                                                                                                                                                                                                                                                                                                                                                                                                                                                                                                                                                                                                                                                                                                                                                                                                                                                                                                                                                                                                                                                                                                                                                                                                                                                                                                               |   |         |          |          |   |         |          |          |   |         |          |          |   |         |          |          |   |         |          |          |   |         |          |          |   |          |          |          |   |         |          |          |   |         |          |          |   |          |          |          |   |         |         |         |   |          |         |         |   |         |         |         |   |          |         |         |   |          |         |         |   |         |         |         |   |         |          |         |   |          |         |         |   |         |         |         |   |          |         |         |   |          |          |          |   |          |          |          |   |          |          |          |   |          |          |          |   |          |          |          |   |          |          |          |   |          |         |          |   |          |         |          |   |          |         |          |   |          |         |          |    |          |         |         |
| C                                                                                                                                                       | 0.45071                                                                                                                                                                                                                                                                                                                                                                                                                                                                                                                                                                                                                                                                                                                                                                                                                                                                                                                                                                                                                                                                                                                                                                                                                                                                                                                                                                                                                                                                                                                                                                                                                                                                                                                                                                                                                                                                                                                                                                                                                                                                                                                                                                                                                                                                                | -0.00191 | -1.54006 |         |          |   |         |         |          |   |         |         |         |   |         |          |          |   |         |         |          |   |         |         |         |   |          |          |          |   |         |         |          |   |         |         |         |   |          |          |         |   |          |         |         |   |          |         |         |   |         |         |         |   |          |         |         |   |          |         |         |   |         |         |         |   |         |         |         |   |          |         |         |   |         |         |         |   |          |         |         |                                                                                                                                                          |                                                                                                                                                                                                                                                                                                                                                                                                                                                                                                                                                                                                                                                                                                                                                                                                                                                                                                                                                                                                                                                                                                                                                                                                                                                                                                                                                                                                                                                                                    |          |          |         |          |          |          |         |          |          |          |          |          |          |          |         |          |          |          |         |          |          |          |         |          |          |          |          |          |          |          |         |          |          |          |         |          |          |          |          |          |         |         |                                                                                                                                                         |                                                                                                                                                                                                                                                                                                                                                                                                                                                                                                                                                                                                                                                                                                                                                                                                                                                                                                                                                                                                                                                                                                                                                                                                                                                                                                                                                                                                                                                                                                                                                                                                                                                                                                                                                                                                                                                                                                                                                                                                                                                                                                                                                                                                                                                                                               |   |         |          |          |   |         |          |          |   |         |          |          |   |         |          |          |   |         |          |          |   |         |          |          |   |          |          |          |   |         |          |          |   |         |          |          |   |          |          |          |   |         |         |         |   |          |         |         |   |         |         |         |   |          |         |         |   |          |         |         |   |         |         |         |   |         |          |         |   |          |         |         |   |         |         |         |   |          |         |         |   |          |          |          |   |          |          |          |   |          |          |          |   |          |          |          |   |          |          |          |   |          |          |          |   |          |         |          |   |          |         |          |   |          |         |          |   |          |         |          |    |          |         |         |
| H                                                                                                                                                       | 3.80601                                                                                                                                                                                                                                                                                                                                                                                                                                                                                                                                                                                                                                                                                                                                                                                                                                                                                                                                                                                                                                                                                                                                                                                                                                                                                                                                                                                                                                                                                                                                                                                                                                                                                                                                                                                                                                                                                                                                                                                                                                                                                                                                                                                                                                                                                | 0.00861  | -3.38039 |         |          |   |         |         |          |   |         |         |         |   |         |          |          |   |         |         |          |   |         |         |         |   |          |          |          |   |         |         |          |   |         |         |         |   |          |          |         |   |          |         |         |   |          |         |         |   |         |         |         |   |          |         |         |   |          |         |         |   |         |         |         |   |         |         |         |   |          |         |         |   |         |         |         |   |          |         |         |                                                                                                                                                          |                                                                                                                                                                                                                                                                                                                                                                                                                                                                                                                                                                                                                                                                                                                                                                                                                                                                                                                                                                                                                                                                                                                                                                                                                                                                                                                                                                                                                                                                                    |          |          |         |          |          |          |         |          |          |          |          |          |          |          |         |          |          |          |         |          |          |          |         |          |          |          |          |          |          |          |         |          |          |          |         |          |          |          |          |          |         |         |                                                                                                                                                         |                                                                                                                                                                                                                                                                                                                                                                                                                                                                                                                                                                                                                                                                                                                                                                                                                                                                                                                                                                                                                                                                                                                                                                                                                                                                                                                                                                                                                                                                                                                                                                                                                                                                                                                                                                                                                                                                                                                                                                                                                                                                                                                                                                                                                                                                                               |   |         |          |          |   |         |          |          |   |         |          |          |   |         |          |          |   |         |          |          |   |         |          |          |   |          |          |          |   |         |          |          |   |         |          |          |   |          |          |          |   |         |         |         |   |          |         |         |   |         |         |         |   |          |         |         |   |          |         |         |   |         |         |         |   |         |          |         |   |          |         |         |   |         |         |         |   |          |         |         |   |          |          |          |   |          |          |          |   |          |          |          |   |          |          |          |   |          |          |          |   |          |          |          |   |          |         |          |   |          |         |          |   |          |         |          |   |          |         |          |    |          |         |         |
| H                                                                                                                                                       | 3.78119                                                                                                                                                                                                                                                                                                                                                                                                                                                                                                                                                                                                                                                                                                                                                                                                                                                                                                                                                                                                                                                                                                                                                                                                                                                                                                                                                                                                                                                                                                                                                                                                                                                                                                                                                                                                                                                                                                                                                                                                                                                                                                                                                                                                                                                                                | 0.00524  | -0.98830 |         |          |   |         |         |          |   |         |         |         |   |         |          |          |   |         |         |          |   |         |         |         |   |          |          |          |   |         |         |          |   |         |         |         |   |          |          |         |   |          |         |         |   |          |         |         |   |         |         |         |   |          |         |         |   |          |         |         |   |         |         |         |   |         |         |         |   |          |         |         |   |         |         |         |   |          |         |         |                                                                                                                                                          |                                                                                                                                                                                                                                                                                                                                                                                                                                                                                                                                                                                                                                                                                                                                                                                                                                                                                                                                                                                                                                                                                                                                                                                                                                                                                                                                                                                                                                                                                    |          |          |         |          |          |          |         |          |          |          |          |          |          |          |         |          |          |          |         |          |          |          |         |          |          |          |          |          |          |          |         |          |          |          |         |          |          |          |          |          |         |         |                                                                                                                                                         |                                                                                                                                                                                                                                                                                                                                                                                                                                                                                                                                                                                                                                                                                                                                                                                                                                                                                                                                                                                                                                                                                                                                                                                                                                                                                                                                                                                                                                                                                                                                                                                                                                                                                                                                                                                                                                                                                                                                                                                                                                                                                                                                                                                                                                                                                               |   |         |          |          |   |         |          |          |   |         |          |          |   |         |          |          |   |         |          |          |   |         |          |          |   |          |          |          |   |         |          |          |   |         |          |          |   |          |          |          |   |         |         |         |   |          |         |         |   |         |         |         |   |          |         |         |   |          |         |         |   |         |         |         |   |         |          |         |   |          |         |         |   |         |         |         |   |          |         |         |   |          |          |          |   |          |          |          |   |          |          |          |   |          |          |          |   |          |          |          |   |          |          |          |   |          |         |          |   |          |         |          |   |          |         |          |   |          |         |          |    |          |         |         |
| H                                                                                                                                                       | -0.51026                                                                                                                                                                                                                                                                                                                                                                                                                                                                                                                                                                                                                                                                                                                                                                                                                                                                                                                                                                                                                                                                                                                                                                                                                                                                                                                                                                                                                                                                                                                                                                                                                                                                                                                                                                                                                                                                                                                                                                                                                                                                                                                                                                                                                                                                               | -0.00484 | -1.06572 |         |          |   |         |         |          |   |         |         |         |   |         |          |          |   |         |         |          |   |         |         |         |   |          |          |          |   |         |         |          |   |         |         |         |   |          |          |         |   |          |         |         |   |          |         |         |   |         |         |         |   |          |         |         |   |          |         |         |   |         |         |         |   |         |         |         |   |          |         |         |   |         |         |         |   |          |         |         |                                                                                                                                                          |                                                                                                                                                                                                                                                                                                                                                                                                                                                                                                                                                                                                                                                                                                                                                                                                                                                                                                                                                                                                                                                                                                                                                                                                                                                                                                                                                                                                                                                                                    |          |          |         |          |          |          |         |          |          |          |          |          |          |          |         |          |          |          |         |          |          |          |         |          |          |          |          |          |          |          |         |          |          |          |         |          |          |          |          |          |         |         |                                                                                                                                                         |                                                                                                                                                                                                                                                                                                                                                                                                                                                                                                                                                                                                                                                                                                                                                                                                                                                                                                                                                                                                                                                                                                                                                                                                                                                                                                                                                                                                                                                                                                                                                                                                                                                                                                                                                                                                                                                                                                                                                                                                                                                                                                                                                                                                                                                                                               |   |         |          |          |   |         |          |          |   |         |          |          |   |         |          |          |   |         |          |          |   |         |          |          |   |          |          |          |   |         |          |          |   |         |          |          |   |          |          |          |   |         |         |         |   |          |         |         |   |         |         |         |   |          |         |         |   |          |         |         |   |         |         |         |   |         |          |         |   |          |         |         |   |         |         |         |   |          |         |         |   |          |          |          |   |          |          |          |   |          |          |          |   |          |          |          |   |          |          |          |   |          |          |          |   |          |         |          |   |          |         |          |   |          |         |          |   |          |         |          |    |          |         |         |
| C                                                                                                                                                       | 1.61323                                                                                                                                                                                                                                                                                                                                                                                                                                                                                                                                                                                                                                                                                                                                                                                                                                                                                                                                                                                                                                                                                                                                                                                                                                                                                                                                                                                                                                                                                                                                                                                                                                                                                                                                                                                                                                                                                                                                                                                                                                                                                                                                                                                                                                                                                | -0.00214 | 0.73946  |         |          |   |         |         |          |   |         |         |         |   |         |          |          |   |         |         |          |   |         |         |         |   |          |          |          |   |         |         |          |   |         |         |         |   |          |          |         |   |          |         |         |   |          |         |         |   |         |         |         |   |          |         |         |   |          |         |         |   |         |         |         |   |         |         |         |   |          |         |         |   |         |         |         |   |          |         |         |                                                                                                                                                          |                                                                                                                                                                                                                                                                                                                                                                                                                                                                                                                                                                                                                                                                                                                                                                                                                                                                                                                                                                                                                                                                                                                                                                                                                                                                                                                                                                                                                                                                                    |          |          |         |          |          |          |         |          |          |          |          |          |          |          |         |          |          |          |         |          |          |          |         |          |          |          |          |          |          |          |         |          |          |          |         |          |          |          |          |          |         |         |                                                                                                                                                         |                                                                                                                                                                                                                                                                                                                                                                                                                                                                                                                                                                                                                                                                                                                                                                                                                                                                                                                                                                                                                                                                                                                                                                                                                                                                                                                                                                                                                                                                                                                                                                                                                                                                                                                                                                                                                                                                                                                                                                                                                                                                                                                                                                                                                                                                                               |   |         |          |          |   |         |          |          |   |         |          |          |   |         |          |          |   |         |          |          |   |         |          |          |   |          |          |          |   |         |          |          |   |         |          |          |   |          |          |          |   |         |         |         |   |          |         |         |   |         |         |         |   |          |         |         |   |          |         |         |   |         |         |         |   |         |          |         |   |          |         |         |   |         |         |         |   |          |         |         |   |          |          |          |   |          |          |          |   |          |          |          |   |          |          |          |   |          |          |          |   |          |          |          |   |          |         |          |   |          |         |          |   |          |         |          |   |          |         |          |    |          |         |         |
| C                                                                                                                                                       | 1.93925                                                                                                                                                                                                                                                                                                                                                                                                                                                                                                                                                                                                                                                                                                                                                                                                                                                                                                                                                                                                                                                                                                                                                                                                                                                                                                                                                                                                                                                                                                                                                                                                                                                                                                                                                                                                                                                                                                                                                                                                                                                                                                                                                                                                                                                                                | -0.00430 | 3.59168  |         |          |   |         |         |          |   |         |         |         |   |         |          |          |   |         |         |          |   |         |         |         |   |          |          |          |   |         |         |          |   |         |         |         |   |          |          |         |   |          |         |         |   |          |         |         |   |         |         |         |   |          |         |         |   |          |         |         |   |         |         |         |   |         |         |         |   |          |         |         |   |         |         |         |   |          |         |         |                                                                                                                                                          |                                                                                                                                                                                                                                                                                                                                                                                                                                                                                                                                                                                                                                                                                                                                                                                                                                                                                                                                                                                                                                                                                                                                                                                                                                                                                                                                                                                                                                                                                    |          |          |         |          |          |          |         |          |          |          |          |          |          |          |         |          |          |          |         |          |          |          |         |          |          |          |          |          |          |          |         |          |          |          |         |          |          |          |          |          |         |         |                                                                                                                                                         |                                                                                                                                                                                                                                                                                                                                                                                                                                                                                                                                                                                                                                                                                                                                                                                                                                                                                                                                                                                                                                                                                                                                                                                                                                                                                                                                                                                                                                                                                                                                                                                                                                                                                                                                                                                                                                                                                                                                                                                                                                                                                                                                                                                                                                                                                               |   |         |          |          |   |         |          |          |   |         |          |          |   |         |          |          |   |         |          |          |   |         |          |          |   |          |          |          |   |         |          |          |   |         |          |          |   |          |          |          |   |         |         |         |   |          |         |         |   |         |         |         |   |          |         |         |   |          |         |         |   |         |         |         |   |         |          |         |   |          |         |         |   |         |         |         |   |          |         |         |   |          |          |          |   |          |          |          |   |          |          |          |   |          |          |          |   |          |          |          |   |          |          |          |   |          |         |          |   |          |         |          |   |          |         |          |   |          |         |          |    |          |         |         |
| C                                                                                                                                                       | 2.87012                                                                                                                                                                                                                                                                                                                                                                                                                                                                                                                                                                                                                                                                                                                                                                                                                                                                                                                                                                                                                                                                                                                                                                                                                                                                                                                                                                                                                                                                                                                                                                                                                                                                                                                                                                                                                                                                                                                                                                                                                                                                                                                                                                                                                                                                                | 0.00000  | 1.38749  |         |          |   |         |         |          |   |         |         |         |   |         |          |          |   |         |         |          |   |         |         |         |   |          |          |          |   |         |         |          |   |         |         |         |   |          |          |         |   |          |         |         |   |          |         |         |   |         |         |         |   |          |         |         |   |          |         |         |   |         |         |         |   |         |         |         |   |          |         |         |   |         |         |         |   |          |         |         |                                                                                                                                                          |                                                                                                                                                                                                                                                                                                                                                                                                                                                                                                                                                                                                                                                                                                                                                                                                                                                                                                                                                                                                                                                                                                                                                                                                                                                                                                                                                                                                                                                                                    |          |          |         |          |          |          |         |          |          |          |          |          |          |          |         |          |          |          |         |          |          |          |         |          |          |          |          |          |          |          |         |          |          |          |         |          |          |          |          |          |         |         |                                                                                                                                                         |                                                                                                                                                                                                                                                                                                                                                                                                                                                                                                                                                                                                                                                                                                                                                                                                                                                                                                                                                                                                                                                                                                                                                                                                                                                                                                                                                                                                                                                                                                                                                                                                                                                                                                                                                                                                                                                                                                                                                                                                                                                                                                                                                                                                                                                                                               |   |         |          |          |   |         |          |          |   |         |          |          |   |         |          |          |   |         |          |          |   |         |          |          |   |          |          |          |   |         |          |          |   |         |          |          |   |          |          |          |   |         |         |         |   |          |         |         |   |         |         |         |   |          |         |         |   |          |         |         |   |         |         |         |   |         |          |         |   |          |         |         |   |         |         |         |   |          |         |         |   |          |          |          |   |          |          |          |   |          |          |          |   |          |          |          |   |          |          |          |   |          |          |          |   |          |         |          |   |          |         |          |   |          |         |          |   |          |         |          |    |          |         |         |
| C                                                                                                                                                       | 0.50756                                                                                                                                                                                                                                                                                                                                                                                                                                                                                                                                                                                                                                                                                                                                                                                                                                                                                                                                                                                                                                                                                                                                                                                                                                                                                                                                                                                                                                                                                                                                                                                                                                                                                                                                                                                                                                                                                                                                                                                                                                                                                                                                                                                                                                                                                | -0.00575 | 1.62739  |         |          |   |         |         |          |   |         |         |         |   |         |          |          |   |         |         |          |   |         |         |         |   |          |          |          |   |         |         |          |   |         |         |         |   |          |          |         |   |          |         |         |   |          |         |         |   |         |         |         |   |          |         |         |   |          |         |         |   |         |         |         |   |         |         |         |   |          |         |         |   |         |         |         |   |          |         |         |                                                                                                                                                          |                                                                                                                                                                                                                                                                                                                                                                                                                                                                                                                                                                                                                                                                                                                                                                                                                                                                                                                                                                                                                                                                                                                                                                                                                                                                                                                                                                                                                                                                                    |          |          |         |          |          |          |         |          |          |          |          |          |          |          |         |          |          |          |         |          |          |          |         |          |          |          |          |          |          |          |         |          |          |          |         |          |          |          |          |          |         |         |                                                                                                                                                         |                                                                                                                                                                                                                                                                                                                                                                                                                                                                                                                                                                                                                                                                                                                                                                                                                                                                                                                                                                                                                                                                                                                                                                                                                                                                                                                                                                                                                                                                                                                                                                                                                                                                                                                                                                                                                                                                                                                                                                                                                                                                                                                                                                                                                                                                                               |   |         |          |          |   |         |          |          |   |         |          |          |   |         |          |          |   |         |          |          |   |         |          |          |   |          |          |          |   |         |          |          |   |         |          |          |   |          |          |          |   |         |         |         |   |          |         |         |   |         |         |         |   |          |         |         |   |          |         |         |   |         |         |         |   |         |          |         |   |          |         |         |   |         |         |         |   |          |         |         |   |          |          |          |   |          |          |          |   |          |          |          |   |          |          |          |   |          |          |          |   |          |          |          |   |          |         |          |   |          |         |          |   |          |         |          |   |          |         |          |    |          |         |         |
| C                                                                                                                                                       | 0.68116                                                                                                                                                                                                                                                                                                                                                                                                                                                                                                                                                                                                                                                                                                                                                                                                                                                                                                                                                                                                                                                                                                                                                                                                                                                                                                                                                                                                                                                                                                                                                                                                                                                                                                                                                                                                                                                                                                                                                                                                                                                                                                                                                                                                                                                                                | -0.00669 | 3.01576  |         |          |   |         |         |          |   |         |         |         |   |         |          |          |   |         |         |          |   |         |         |         |   |          |          |          |   |         |         |          |   |         |         |         |   |          |          |         |   |          |         |         |   |          |         |         |   |         |         |         |   |          |         |         |   |          |         |         |   |         |         |         |   |         |         |         |   |          |         |         |   |         |         |         |   |          |         |         |                                                                                                                                                          |                                                                                                                                                                                                                                                                                                                                                                                                                                                                                                                                                                                                                                                                                                                                                                                                                                                                                                                                                                                                                                                                                                                                                                                                                                                                                                                                                                                                                                                                                    |          |          |         |          |          |          |         |          |          |          |          |          |          |          |         |          |          |          |         |          |          |          |         |          |          |          |          |          |          |          |         |          |          |          |         |          |          |          |          |          |         |         |                                                                                                                                                         |                                                                                                                                                                                                                                                                                                                                                                                                                                                                                                                                                                                                                                                                                                                                                                                                                                                                                                                                                                                                                                                                                                                                                                                                                                                                                                                                                                                                                                                                                                                                                                                                                                                                                                                                                                                                                                                                                                                                                                                                                                                                                                                                                                                                                                                                                               |   |         |          |          |   |         |          |          |   |         |          |          |   |         |          |          |   |         |          |          |   |         |          |          |   |          |          |          |   |         |          |          |   |         |          |          |   |          |          |          |   |         |         |         |   |          |         |         |   |         |         |         |   |          |         |         |   |          |         |         |   |         |         |         |   |         |          |         |   |          |         |         |   |         |         |         |   |          |         |         |   |          |          |          |   |          |          |          |   |          |          |          |   |          |          |          |   |          |          |          |   |          |          |          |   |          |         |          |   |          |         |          |   |          |         |          |   |          |         |          |    |          |         |         |
| C                                                                                                                                                       | 3.04667                                                                                                                                                                                                                                                                                                                                                                                                                                                                                                                                                                                                                                                                                                                                                                                                                                                                                                                                                                                                                                                                                                                                                                                                                                                                                                                                                                                                                                                                                                                                                                                                                                                                                                                                                                                                                                                                                                                                                                                                                                                                                                                                                                                                                                                                                | -0.00099 | 2.75775  |         |          |   |         |         |          |   |         |         |         |   |         |          |          |   |         |         |          |   |         |         |         |   |          |          |          |   |         |         |          |   |         |         |         |   |          |          |         |   |          |         |         |   |          |         |         |   |         |         |         |   |          |         |         |   |          |         |         |   |         |         |         |   |         |         |         |   |          |         |         |   |         |         |         |   |          |         |         |                                                                                                                                                          |                                                                                                                                                                                                                                                                                                                                                                                                                                                                                                                                                                                                                                                                                                                                                                                                                                                                                                                                                                                                                                                                                                                                                                                                                                                                                                                                                                                                                                                                                    |          |          |         |          |          |          |         |          |          |          |          |          |          |          |         |          |          |          |         |          |          |          |         |          |          |          |          |          |          |          |         |          |          |          |         |          |          |          |          |          |         |         |                                                                                                                                                         |                                                                                                                                                                                                                                                                                                                                                                                                                                                                                                                                                                                                                                                                                                                                                                                                                                                                                                                                                                                                                                                                                                                                                                                                                                                                                                                                                                                                                                                                                                                                                                                                                                                                                                                                                                                                                                                                                                                                                                                                                                                                                                                                                                                                                                                                                               |   |         |          |          |   |         |          |          |   |         |          |          |   |         |          |          |   |         |          |          |   |         |          |          |   |          |          |          |   |         |          |          |   |         |          |          |   |          |          |          |   |         |         |         |   |          |         |         |   |         |         |         |   |          |         |         |   |          |         |         |   |         |         |         |   |         |          |         |   |          |         |         |   |         |         |         |   |          |         |         |   |          |          |          |   |          |          |          |   |          |          |          |   |          |          |          |   |          |          |          |   |          |          |          |   |          |         |          |   |          |         |          |   |          |         |          |   |          |         |          |    |          |         |         |
| H                                                                                                                                                       | 3.76574                                                                                                                                                                                                                                                                                                                                                                                                                                                                                                                                                                                                                                                                                                                                                                                                                                                                                                                                                                                                                                                                                                                                                                                                                                                                                                                                                                                                                                                                                                                                                                                                                                                                                                                                                                                                                                                                                                                                                                                                                                                                                                                                                                                                                                                                                | 0.00263  | 0.79131  |         |          |   |         |         |          |   |         |         |         |   |         |          |          |   |         |         |          |   |         |         |         |   |          |          |          |   |         |         |          |   |         |         |         |   |          |          |         |   |          |         |         |   |          |         |         |   |         |         |         |   |          |         |         |   |          |         |         |   |         |         |         |   |         |         |         |   |          |         |         |   |         |         |         |   |          |         |         |                                                                                                                                                          |                                                                                                                                                                                                                                                                                                                                                                                                                                                                                                                                                                                                                                                                                                                                                                                                                                                                                                                                                                                                                                                                                                                                                                                                                                                                                                                                                                                                                                                                                    |          |          |         |          |          |          |         |          |          |          |          |          |          |          |         |          |          |          |         |          |          |          |         |          |          |          |          |          |          |          |         |          |          |          |         |          |          |          |          |          |         |         |                                                                                                                                                         |                                                                                                                                                                                                                                                                                                                                                                                                                                                                                                                                                                                                                                                                                                                                                                                                                                                                                                                                                                                                                                                                                                                                                                                                                                                                                                                                                                                                                                                                                                                                                                                                                                                                                                                                                                                                                                                                                                                                                                                                                                                                                                                                                                                                                                                                                               |   |         |          |          |   |         |          |          |   |         |          |          |   |         |          |          |   |         |          |          |   |         |          |          |   |          |          |          |   |         |          |          |   |         |          |          |   |          |          |          |   |         |         |         |   |          |         |         |   |         |         |         |   |          |         |         |   |          |         |         |   |         |         |         |   |         |          |         |   |          |         |         |   |         |         |         |   |          |         |         |   |          |          |          |   |          |          |          |   |          |          |          |   |          |          |          |   |          |          |          |   |          |          |          |   |          |         |          |   |          |         |          |   |          |         |          |   |          |         |          |    |          |         |         |
| H                                                                                                                                                       | -0.18577                                                                                                                                                                                                                                                                                                                                                                                                                                                                                                                                                                                                                                                                                                                                                                                                                                                                                                                                                                                                                                                                                                                                                                                                                                                                                                                                                                                                                                                                                                                                                                                                                                                                                                                                                                                                                                                                                                                                                                                                                                                                                                                                                                                                                                                                               | -0.00937 | 3.66001  |         |          |   |         |         |          |   |         |         |         |   |         |          |          |   |         |         |          |   |         |         |         |   |          |          |          |   |         |         |          |   |         |         |         |   |          |          |         |   |          |         |         |   |          |         |         |   |         |         |         |   |          |         |         |   |          |         |         |   |         |         |         |   |         |         |         |   |          |         |         |   |         |         |         |   |          |         |         |                                                                                                                                                          |                                                                                                                                                                                                                                                                                                                                                                                                                                                                                                                                                                                                                                                                                                                                                                                                                                                                                                                                                                                                                                                                                                                                                                                                                                                                                                                                                                                                                                                                                    |          |          |         |          |          |          |         |          |          |          |          |          |          |          |         |          |          |          |         |          |          |          |         |          |          |          |          |          |          |          |         |          |          |          |         |          |          |          |          |          |         |         |                                                                                                                                                         |                                                                                                                                                                                                                                                                                                                                                                                                                                                                                                                                                                                                                                                                                                                                                                                                                                                                                                                                                                                                                                                                                                                                                                                                                                                                                                                                                                                                                                                                                                                                                                                                                                                                                                                                                                                                                                                                                                                                                                                                                                                                                                                                                                                                                                                                                               |   |         |          |          |   |         |          |          |   |         |          |          |   |         |          |          |   |         |          |          |   |         |          |          |   |          |          |          |   |         |          |          |   |         |          |          |   |          |          |          |   |         |         |         |   |          |         |         |   |         |         |         |   |          |         |         |   |          |         |         |   |         |         |         |   |         |          |         |   |          |         |         |   |         |         |         |   |          |         |         |   |          |          |          |   |          |          |          |   |          |          |          |   |          |          |          |   |          |          |          |   |          |          |          |   |          |         |          |   |          |         |          |   |          |         |          |   |          |         |          |    |          |         |         |
| H                                                                                                                                                       | 4.04920                                                                                                                                                                                                                                                                                                                                                                                                                                                                                                                                                                                                                                                                                                                                                                                                                                                                                                                                                                                                                                                                                                                                                                                                                                                                                                                                                                                                                                                                                                                                                                                                                                                                                                                                                                                                                                                                                                                                                                                                                                                                                                                                                                                                                                                                                | 0.00086  | 3.16449  |         |          |   |         |         |          |   |         |         |         |   |         |          |          |   |         |         |          |   |         |         |         |   |          |          |          |   |         |         |          |   |         |         |         |   |          |          |         |   |          |         |         |   |          |         |         |   |         |         |         |   |          |         |         |   |          |         |         |   |         |         |         |   |         |         |         |   |          |         |         |   |         |         |         |   |          |         |         |                                                                                                                                                          |                                                                                                                                                                                                                                                                                                                                                                                                                                                                                                                                                                                                                                                                                                                                                                                                                                                                                                                                                                                                                                                                                                                                                                                                                                                                                                                                                                                                                                                                                    |          |          |         |          |          |          |         |          |          |          |          |          |          |          |         |          |          |          |         |          |          |          |         |          |          |          |          |          |          |          |         |          |          |          |         |          |          |          |          |          |         |         |                                                                                                                                                         |                                                                                                                                                                                                                                                                                                                                                                                                                                                                                                                                                                                                                                                                                                                                                                                                                                                                                                                                                                                                                                                                                                                                                                                                                                                                                                                                                                                                                                                                                                                                                                                                                                                                                                                                                                                                                                                                                                                                                                                                                                                                                                                                                                                                                                                                                               |   |         |          |          |   |         |          |          |   |         |          |          |   |         |          |          |   |         |          |          |   |         |          |          |   |          |          |          |   |         |          |          |   |         |          |          |   |          |          |          |   |         |         |         |   |          |         |         |   |         |         |         |   |          |         |         |   |          |         |         |   |         |         |         |   |         |          |         |   |          |         |         |   |         |         |         |   |          |         |         |   |          |          |          |   |          |          |          |   |          |          |          |   |          |          |          |   |          |          |          |   |          |          |          |   |          |         |          |   |          |         |          |   |          |         |          |   |          |         |          |    |          |         |         |
| H                                                                                                                                                       | 2.04116                                                                                                                                                                                                                                                                                                                                                                                                                                                                                                                                                                                                                                                                                                                                                                                                                                                                                                                                                                                                                                                                                                                                                                                                                                                                                                                                                                                                                                                                                                                                                                                                                                                                                                                                                                                                                                                                                                                                                                                                                                                                                                                                                                                                                                                                                | -0.00508 | 4.66859  |         |          |   |         |         |          |   |         |         |         |   |         |          |          |   |         |         |          |   |         |         |         |   |          |          |          |   |         |         |          |   |         |         |         |   |          |          |         |   |          |         |         |   |          |         |         |   |         |         |         |   |          |         |         |   |          |         |         |   |         |         |         |   |         |         |         |   |          |         |         |   |         |         |         |   |          |         |         |                                                                                                                                                          |                                                                                                                                                                                                                                                                                                                                                                                                                                                                                                                                                                                                                                                                                                                                                                                                                                                                                                                                                                                                                                                                                                                                                                                                                                                                                                                                                                                                                                                                                    |          |          |         |          |          |          |         |          |          |          |          |          |          |          |         |          |          |          |         |          |          |          |         |          |          |          |          |          |          |          |         |          |          |          |         |          |          |          |          |          |         |         |                                                                                                                                                         |                                                                                                                                                                                                                                                                                                                                                                                                                                                                                                                                                                                                                                                                                                                                                                                                                                                                                                                                                                                                                                                                                                                                                                                                                                                                                                                                                                                                                                                                                                                                                                                                                                                                                                                                                                                                                                                                                                                                                                                                                                                                                                                                                                                                                                                                                               |   |         |          |          |   |         |          |          |   |         |          |          |   |         |          |          |   |         |          |          |   |         |          |          |   |          |          |          |   |         |          |          |   |         |          |          |   |          |          |          |   |         |         |         |   |          |         |         |   |         |         |         |   |          |         |         |   |          |         |         |   |         |         |         |   |         |          |         |   |          |         |         |   |         |         |         |   |          |         |         |   |          |          |          |   |          |          |          |   |          |          |          |   |          |          |          |   |          |          |          |   |          |          |          |   |          |         |          |   |          |         |          |   |          |         |          |   |          |         |          |    |          |         |         |

|                                                                                                                                                                                                                        |                                                                                                                                                                                                                                                                                                                                                                                                                                                                                                                                                                                                                                                                                                                                                                                                                                                                                                                                                                                                                                                                                                                                                                                                                                                                                                                                |                                                                                                                                                                                                                         |                                                                                                                                                                                                                                                                                                                                                                                                                                                                                                                                                                                                                                                                                                                                                                                                                                                                                                                                                                                                                                                                                                                                                                                                                                                                                                                           |
|------------------------------------------------------------------------------------------------------------------------------------------------------------------------------------------------------------------------|--------------------------------------------------------------------------------------------------------------------------------------------------------------------------------------------------------------------------------------------------------------------------------------------------------------------------------------------------------------------------------------------------------------------------------------------------------------------------------------------------------------------------------------------------------------------------------------------------------------------------------------------------------------------------------------------------------------------------------------------------------------------------------------------------------------------------------------------------------------------------------------------------------------------------------------------------------------------------------------------------------------------------------------------------------------------------------------------------------------------------------------------------------------------------------------------------------------------------------------------------------------------------------------------------------------------------------|-------------------------------------------------------------------------------------------------------------------------------------------------------------------------------------------------------------------------|---------------------------------------------------------------------------------------------------------------------------------------------------------------------------------------------------------------------------------------------------------------------------------------------------------------------------------------------------------------------------------------------------------------------------------------------------------------------------------------------------------------------------------------------------------------------------------------------------------------------------------------------------------------------------------------------------------------------------------------------------------------------------------------------------------------------------------------------------------------------------------------------------------------------------------------------------------------------------------------------------------------------------------------------------------------------------------------------------------------------------------------------------------------------------------------------------------------------------------------------------------------------------------------------------------------------------|
|                                                                                                                                                                                                                        | C -0.15698 -1.73674 -2.28172<br>H 0.32692 -1.68632 -3.26114<br>C 0.25226 -3.05669 -1.61561<br>H -0.21867 -3.15027 -0.63425<br>H 1.33401 -3.11042 -1.47885<br>H -0.06585 -3.90555 -2.22540<br>C -1.67621 -1.69238 -2.49510<br>H -2.19600 -1.72735 -1.53476<br>H -2.00321 -2.54682 -3.09249<br>H -1.97448 -0.77414 -3.00434<br>I -3.13681 0.95079 0.99279                                                                                                                                                                                                                                                                                                                                                                                                                                                                                                                                                                                                                                                                                                                                                                                                                                                                                                                                                                        |                                                                                                                                                                                                                         | C -0.86149 -0.00221 -3.68553<br>H -0.62975 0.00049 -4.75439<br>C -1.67758 -1.26428 -3.37490<br>H -1.93337 -1.29832 -2.31332<br>H -1.11416 -2.16752 -3.61664<br>H -2.60724 -1.26767 -3.94897<br>C -1.68488 1.25392 -3.37012<br>H -1.94106 1.28238 -2.30847<br>H -2.61444 1.25417 -3.94434<br>H -1.12665 2.16133 -3.60825<br>I -1.59403 -0.01073 1.17237                                                                                                                                                                                                                                                                                                                                                                                                                                                                                                                                                                                                                                                                                                                                                                                                                                                                                                                                                                    |
| 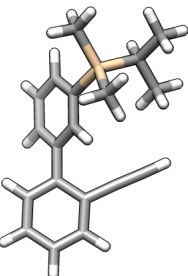 <p><b>1h</b><br/>                     -1026.562753<br/>                     -1026.471046<br/>                     -1027.209784</p>   | H 3.20848 0.03920 -0.74996<br>C 2.41908 0.26487 -0.04243<br>C 0.41130 0.86959 1.80795<br>C 2.69957 1.08237 1.04695<br>C 1.13778 -0.27002 -0.23116<br>C 0.15252 0.04578 0.70859<br>C 1.70243 1.38237 1.96714<br>H 3.69347 1.49113 1.17855<br>H -0.84224 -0.36232 0.59548<br>H 1.91663 2.02956 2.80786<br>C -0.63631 1.17139 2.80953<br>C -2.55506 1.71132 4.80079<br>C -1.95077 1.55264 2.45315<br>C -0.32083 1.08280 4.16912<br>C -1.25981 1.34659 5.15673<br>C -2.89281 1.81438 3.46087<br>H 0.68046 0.78115 4.44640<br>H -0.98381 1.25967 6.19950<br>H -3.89150 2.11051 3.17034<br>H -3.29633 1.91635 5.56168<br>Si 0.72909 -1.31707 -1.73794<br>C 2.21291 -2.38300 -2.18646<br>H 2.00214 -2.99628 -3.06655<br>H 2.48333 -3.05269 -1.36598<br>H 3.08720 -1.76715 -2.41532<br>C -0.77373 -2.38300 -1.36110<br>H -1.63958 -1.76774 -1.10353<br>H -0.58318 -3.05733 -0.52219<br>H -1.04616 -2.99245 -2.22689<br>C 0.32092 -0.15993 -3.18187<br>H 1.20858 0.46369 -3.34381<br>C 0.03603 -0.93773 -4.47505<br>H -0.83940 -1.58253 -4.35376<br>H 0.87874 -1.56886 -4.76651<br>H -0.17446 -0.25299 -5.30275<br>C -0.85439 0.76568 -2.83663<br>H -1.76604 0.18316 -2.67297<br>H -1.05251 1.46451 -3.65595<br>H -0.66281 1.34282 -1.93030<br>C -2.35572 1.72819 1.09627<br>C -2.73386 1.89954 -0.03264<br>H -3.04324 2.03916 -1.03874 |  <p><b>1h</b><br/>                     -1026.554229<br/>                     -1026.462320<br/>                     -1027.201545</p>   | H -0.43487 3.11865 2.08001<br>C -0.32306 2.54350 1.16799<br>C -0.05482 1.08017 -1.24289<br>C -0.41581 3.18470 -0.06130<br>C -0.08857 1.16738 1.22251<br>C 0.03802 0.46976 0.01664<br>C -0.28303 2.46889 -1.24187<br>H -0.59418 4.25168 -0.10770<br>H 0.20969 -0.58877 0.06790<br>H -0.36330 3.02349 -2.16299<br>C 0.07535 0.31940 -2.52474<br>C 0.30088 -0.95899 -5.07029<br>C 0.31931 -1.08001 -2.63175<br>C -0.04903 1.01235 -3.74288<br>C 0.05804 0.40653 -4.98293<br>C 0.42722 -1.68260 -3.90096<br>H -0.23986 2.07238 -3.73618<br>H -0.04944 1.00529 -5.87790<br>H 0.61401 -2.74694 -3.94040<br>H 0.38863 -1.45123 -6.02947<br>Si 0.09500 0.27226 2.86810<br>C 1.79217 0.64372 3.59479<br>H 1.91117 0.18286 4.57927<br>H 1.94311 1.72081 3.70814<br>H 2.58646 0.26476 2.94567<br>C -1.23844 0.87526 4.05179<br>H -2.23688 0.66882 3.65856<br>H -1.16270 1.95356 4.21654<br>H -1.15011 0.38597 5.02586<br>C -0.08359 -1.58903 2.58203<br>H 0.65455 -1.86233 1.81898<br>C 0.23497 -2.38458 3.85718<br>H -0.46429 -2.13022 4.65931<br>H 1.24609 -2.18719 4.21965<br>H 0.14411 -3.46047 3.67635<br>C -1.47635 -1.95888 2.05234<br>H -2.24682 -1.70435 2.78556<br>H -1.54652 -3.03465 1.86216<br>H -1.70961 -1.43836 1.12236<br>C 0.47267 -2.00667 -1.55476<br>C 0.61420 -2.89792 -0.75768<br>H 0.72600 -3.65274 -0.01926 |
|  <p><b>1i</b><br/>                     -1084.373776<br/>                     -1084.282482<br/>                     -1085.064690</p> | H 3.28129 0.02207 -0.55908<br>C 2.46466 0.23972 0.11862<br>C 0.37322 0.84717 1.87620<br>C 2.70220 1.02659 1.24069<br>C 1.18596 -0.27312 -0.14134<br>C 0.16310 0.03532 0.75892<br>C 1.66175 1.33358 2.11145<br>H 3.69557 1.41259 1.43264<br>H -0.83567 -0.34202 0.59166<br>H 1.84006 1.96694 2.97128<br>C -0.74394 1.16830 2.79642<br>C -2.83301 1.56687 4.62282<br>C -2.00723 1.61299 2.33323<br>C -0.55731 0.98065 4.16636<br>C -1.58434 1.17434 5.08358<br>C -3.03626 1.79148 3.26529<br>H 0.40989 0.63388 4.50723<br>H -1.41294 1.00189 6.13770<br>H -4.00601 2.12832 2.92951<br>H -3.65177 1.71362 5.31559<br>Si 0.79570 -1.27146 -1.68396<br>C 2.39958 -1.75127 -2.54129<br>H 2.20129 -2.36902 -3.42075<br>H 3.05244 -2.31958 -1.87343<br>H 2.95082 -0.86760 -2.87519<br>C -0.18884 -2.80259 -1.20678<br>H -1.08554 -2.53097 -0.64402<br>H 0.40456 -3.47363 -0.58051<br>H -0.50695 -3.36037 -2.09213                                                                                                                                                                                                                                                                                                                                                                                                                      |  <p><b>1i</b><br/>                     -1084.362122<br/>                     -1084.270534<br/>                     -1085.053352</p> | H -3.11447 2.44437 -0.19278<br>C -2.60280 1.49090 -0.14188<br>C -1.29883 -1.03283 -0.01296<br>C -3.31904 -0.31110 -0.31110<br>C -1.22847 1.43590 0.09205<br>C -0.61359 0.17977 0.16027<br>C -2.68194 -0.91898 -0.26215<br>H -4.38405 0.34453 -0.51055<br>H 0.44562 0.14312 0.31618<br>H -3.28873 -1.79200 -0.44175<br>Si -0.16718 2.97145 0.29734<br>C -1.27411 4.49141 0.35170<br>H -0.68745 5.39590 0.53044<br>H -2.01727 4.41211 1.14964<br>H -1.81036 4.62503 -0.59212<br>C 0.82617 2.81789 1.89086<br>H 1.40230 1.88925 1.89857<br>H 0.16970 2.80595 2.76476<br>H 1.52744 3.64905 2.00578<br>C 1.05200 3.12190 -1.14953<br>H 0.45505 3.11765 -2.06922<br>C 1.82125 4.45098 -1.08379<br>H 2.41961 4.50847 -0.16950<br>H 1.15102 5.31312 -1.09953<br>H 2.50929 4.54201 -1.93031<br>C 2.03724 1.94446 -1.21621<br>H 2.63240 1.88669 -0.29958<br>H 2.73458 2.07490 -2.05014<br>H 1.53003 0.98788 -1.34426                                                                                                                                                                                                                                                                                                                                                                                                                |



|                                                                                                                                                                                                                        |                                                                                                                                                                                                                                                                                                                                                                                                                                                                                                                                                                                                                                                                                                                                                                                                                                                                                                                                                                                                                                                                   |                                                                                                                                                                                                                         |                                                                                                                                                                                                                                                                                                                                                                                                                                                                                                                                                                                                                                                                                                                                                                                                                                                                                                                                                                                                                                                                          |
|------------------------------------------------------------------------------------------------------------------------------------------------------------------------------------------------------------------------|-------------------------------------------------------------------------------------------------------------------------------------------------------------------------------------------------------------------------------------------------------------------------------------------------------------------------------------------------------------------------------------------------------------------------------------------------------------------------------------------------------------------------------------------------------------------------------------------------------------------------------------------------------------------------------------------------------------------------------------------------------------------------------------------------------------------------------------------------------------------------------------------------------------------------------------------------------------------------------------------------------------------------------------------------------------------|-------------------------------------------------------------------------------------------------------------------------------------------------------------------------------------------------------------------------|--------------------------------------------------------------------------------------------------------------------------------------------------------------------------------------------------------------------------------------------------------------------------------------------------------------------------------------------------------------------------------------------------------------------------------------------------------------------------------------------------------------------------------------------------------------------------------------------------------------------------------------------------------------------------------------------------------------------------------------------------------------------------------------------------------------------------------------------------------------------------------------------------------------------------------------------------------------------------------------------------------------------------------------------------------------------------|
|                                                                                                                                                                                                                        | C -0.25791 -0.20955 -2.85155<br>H 0.30190 0.71871 -3.01804<br>C -0.45915 -0.89877 -4.20984<br>H -0.99602 -1.84447 -4.08885<br>H 0.49082 -1.11399 -4.70395<br>H -1.05371 -0.26979 -4.88015<br>C -1.61638 0.15618 -2.23395<br>H -2.21477 -0.74341 -2.06246<br>H -2.18521 0.80114 -2.91222<br>H -1.51257 0.67143 -1.27839<br>N -2.21510 1.85860 0.95675<br>C -1.41532 2.93126 0.37365<br>H -1.45799 2.85599 -0.71473<br>H -1.79772 3.92027 0.67076<br>H -0.37651 2.85099 0.68143<br>C -3.58607 1.90867 0.48882<br>H -3.57857 1.86812 -0.60183<br>H -4.14247 1.05142 0.86814<br>H -4.11195 2.82850 0.79283                                                                                                                                                                                                                                                                                                                                                                                                                                                            |                                                                                                                                                                                                                         | C -0.62922 -2.37474 -0.00957<br>C 0.77737 -2.59856 0.03238<br>C -1.42926 -3.52670 -0.12904<br>C 1.28215 -3.89068 -0.15533<br>C -0.91718 -4.80425 -0.28632<br>H -2.50278 -3.43297 -0.11041<br>C 0.45721 -4.98977 -0.32901<br>H 2.35272 -4.03573 -0.14017<br>H -1.59322 -5.64343 -0.38363<br>H 0.88360 -5.97498 -0.46651<br>N 1.69683 -1.54521 0.29552<br>C 1.78380 -1.20713 1.71253<br>H 2.32371 -0.26379 1.82787<br>H 0.78539 -1.08578 2.13023<br>H 2.31325 -1.98645 2.28186<br>C 3.01134 -1.63145 -0.31396<br>H 2.91474 -1.90696 -1.36366<br>H 3.48406 -0.64892 -0.25117<br>H 3.67638 -2.35770 0.18072                                                                                                                                                                                                                                                                                                                                                                                                                                                                  |
| 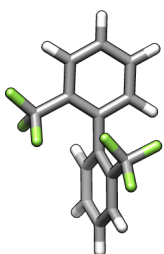 <p><b>2a</b><br/>                     -1137.347954<br/>                     -1137.152161<br/>                     -1138.008888</p>   | C -1.01905 -1.47297 -1.03292<br>C -0.35903 0.19861 1.11953<br>C -1.28544 -1.87447 0.27010<br>C -0.42697 -0.23859 -1.26476<br>C -0.10319 0.58655 -0.19465<br>C -0.96108 -1.04887 1.34329<br>H -1.75471 -2.82923 0.45540<br>H 0.34928 1.55166 -0.37237<br>C 0.04701 1.11253 2.22630<br>C 0.93848 2.79772 4.28270<br>C 1.18874 0.80266 2.96355<br>C -0.65240 2.28780 2.53952<br>C -0.20392 3.12065 3.56120<br>C 1.63554 1.63496 3.98255<br>H -0.75524 4.01878 3.79680<br>H 2.52459 1.37134 4.53996<br>H -0.21822 0.08629 -2.27545<br>H -1.27788 -2.12149 -1.85889<br>H 1.27588 3.45085 5.07603<br>H 1.72401 -0.10752 2.73381<br>C -1.26035 -1.52116 2.74640<br>C -1.89374 2.67588 1.77167<br>F -0.12677 -1.86210 3.41037<br>F -1.87659 -0.58013 3.48834<br>F -2.05339 -2.61142 2.76388<br>F -2.75850 1.65192 1.63340<br>F -1.59159 3.10409 0.51958<br>F -2.57122 3.68005 2.36370                                                                                                                                                                                     |  <p><b>2a</b><br/>                     -1137.308736<br/>                     -1137.112204<br/>                     -1137.973303</p>   | C -0.15590 -1.99862 -2.97998<br>C 0.03906 -0.43751 -0.57978<br>C -0.21455 -2.59254 -1.72986<br>C 0.15022 -0.65381 -3.03872<br>C 0.24906 0.07999 -1.86721<br>C -0.06485 -1.87225 -0.54203<br>H -0.33837 -3.66230 -1.67858<br>C -0.03762 0.51564 0.59091<br>C 0.15513 2.07689 2.99124<br>C 0.06594 1.95040 0.55322<br>C -0.24790 -0.00197 1.87826<br>C -0.15021 0.73189 3.04981<br>C 0.21450 2.67077 1.74114<br>H -0.30982 0.23364 3.99665<br>H 0.33804 3.74057 1.68993<br>H 0.30952 -0.15562 -3.98564<br>H -0.28416 -2.59389 -3.87343<br>H 0.28236 2.67229 3.88475<br>H 0.52060 1.10242 -1.99102<br>H -0.51889 -1.02456 2.00196<br>C 0.11274 -2.78323 0.66822<br>C -0.11059 2.86135 -0.65722<br>F -0.99653 -2.88261 1.45010<br>F 1.13929 -2.39519 1.45417<br>F 0.40004 -4.05294 0.31336<br>F 0.99932 2.96023 -1.43825<br>F -1.13671 2.47366 -1.44391<br>F -0.39773 4.13120 -0.30270                                                                                                                                                                                       |
|  <p><b>2b</b><br/>                     -918.1896707<br/>                     -918.0382527<br/>                     -918.8004974</p> | C -1.66513 -1.83415 -0.68132<br>C -0.59207 -0.01558 1.17198<br>C -1.87644 -2.01710 0.67977<br>C -0.92267 -0.74572 -1.12104<br>C -0.39412 0.15040 -0.19869<br>C -1.34675 -1.11772 1.60222<br>H -2.45498 -2.86003 1.02766<br>H 0.18667 0.99831 -0.53639<br>C 0.00149 0.98906 2.10251<br>C 1.07001 2.97093 3.74431<br>C 1.28039 0.81060 2.64841<br>C -0.72653 2.14599 2.38571<br>C -0.20095 3.13622 3.20417<br>C 1.79538 1.82034 3.46454<br>H -0.77874 4.02530 3.41979<br>H 2.78263 1.70086 3.89039<br>H -0.75315 -0.59249 -2.17885<br>H -2.08056 -2.53794 -1.38984<br>H 1.49439 3.73426 4.38380<br>C -1.58714 -1.34057 3.07596<br>F -0.42925 -1.51708 3.75542<br>F -2.22191 -0.29776 3.65155<br>F -2.34161 -2.43339 3.31716<br>H -1.71703 2.25877 1.96452<br>C 2.11487 -0.41390 2.32615<br>H 1.44762 -1.18217 1.93578<br>C 2.81404 -1.00091 3.55606<br>H 3.32824 -1.92498 3.28296<br>H 2.09456 -1.22198 4.34505<br>H 3.56206 -0.31195 3.95417<br>C 3.13591 -0.08145 1.22847<br>H 3.72349 -0.96649 0.97202<br>H 3.82040 0.69823 1.57187<br>H 2.63714 0.27741 0.32605 |  <p><b>2b</b><br/>                     -918.1499168<br/>                     -917.9985133<br/>                     -918.7633223</p> | C 0.12541 -2.50885 -2.60392<br>C 0.12838 -0.71569 -0.38380<br>C 0.02386 -2.96678 -1.30201<br>C 0.38468 -1.16289 -2.79762<br>C 0.38803 -0.31169 -1.70740<br>C 0.09670 -2.13631 -0.17775<br>H -0.07779 -4.03079 -1.14526<br>C -0.05983 0.34183 0.67714<br>C -0.05633 2.15393 2.91137<br>C -0.04644 1.76913 0.49794<br>C -0.30349 -0.04871 2.00762<br>C -0.29496 0.80597 3.09837<br>C 0.01667 2.61670 1.60841<br>H -0.47376 0.40165 4.08615<br>H 0.07908 3.68123 1.44755<br>H 0.57668 -0.76275 -3.78416<br>H 0.06175 -3.19865 -3.43523<br>H 0.00250 2.84406 3.74154<br>H 0.62862 0.70572 -1.91821<br>H -0.52908 -1.06942 2.21819<br>C 0.23362 -2.89896 1.14424<br>C -0.24654 2.53586 -0.80505<br>F 0.88549 2.66924 -1.54793<br>F -1.19393 1.98195 -1.58843<br>F -0.66621 3.80241 -0.58718<br>H 0.69362 -2.24428 1.87672<br>C -1.12707 -3.39005 1.66221<br>H -1.01686 -3.88592 2.62979<br>H -1.54237 -4.11127 0.95453<br>H -1.85101 -2.57955 1.76474<br>C 1.20397 -4.09136 1.05330<br>H 2.14750 -3.79641 0.59189<br>H 0.78971 -4.92535 0.48550<br>H 1.40857 -4.45440 2.06304 |

|                                                                                                                                                                                                                        |                                                                                                                                                                                                                                                                                                                                                                                                                                                                                                                                                                                                                                                                                                                                                                                                                                                                                                                                                                                                                                                                                                                                                                                                                                                                                                                                                                                                                                                                                                                                                                                                                                                                                                                                                                                                                                                                                                                                                                                                                                                                                                                                                                                                                                                                                                                                                                                                                                                                                                                                                                                                                                                                                                                                                                                                                                                                                                                                                                                                                                                                                                                                                                |          |          |          |          |   |          |          |          |   |          |          |          |   |          |          |          |   |          |         |          |   |          |          |          |   |          |          |          |   |          |         |          |   |          |         |          |   |         |         |         |   |         |         |         |   |          |         |          |   |          |         |         |   |         |         |         |   |          |         |         |   |         |         |         |   |          |          |          |   |          |          |          |   |         |         |         |   |          |          |         |   |          |         |          |   |         |          |         |   |         |          |          |   |         |          |          |   |         |          |          |   |         |          |          |   |         |          |         |   |         |          |         |   |         |          |         |   |         |         |         |   |          |          |         |   |          |          |         |   |          |          |         |   |          |          |         |   |          |          |         |   |          |          |         |   |          |          |         |   |          |          |         |   |          |          |         |   |          |          |          |                                                                                                                                                                                                                       |                                                                                                                                                                                                                                                                                                                                                                                                                                                                                                                                                                                                                                                                                                                                                                                                                                                                                                                                                                                                                                                                                                                                                                                                                                                                                                                                                                                                                                                                                                                                                                                                                                                                                                                                                                                                                                                                                                                                                                                                                                                                                                                                                                                                                                                                                                                                                                                                                                                                                                                                                                                                                                                                                                                                                                                                                                                                                                                                         |          |          |          |          |         |         |          |          |         |          |                                                                                                                                                                                                                         |                                                                                                                                                                                                                                                                                                                                                                                                                                                                                                                                                                                                                                                                                                                                                                                                                                                                                                                                                                                                                                                                                                                                                                                                                                                                                                                                                                                                                                                                                                                                                                                                                                                                                                                                                                                                                                                                                                                                                                                                                                                                                                                                                                                                                                                                                                                                                                                                                                                                                                                                                                                                                                                                                                                                                                                                                                                                                                                                                                                                                                                                                                                                                             |   |          |          |          |   |          |          |          |   |          |          |          |   |          |          |          |   |          |          |          |   |          |          |          |   |          |          |          |   |          |         |         |   |          |         |         |   |         |         |         |   |          |         |         |   |          |         |         |   |         |          |          |   |          |          |          |   |         |         |         |   |         |          |          |   |          |          |          |   |          |         |          |   |          |          |          |   |          |          |         |   |          |          |         |   |          |          |          |   |         |          |         |   |         |          |         |   |         |          |          |   |          |          |         |   |          |          |          |   |          |          |          |   |          |          |          |   |          |          |          |   |          |         |          |   |          |         |          |   |          |         |          |   |          |         |          |   |          |         |          |   |         |          |          |   |         |          |          |   |         |         |          |   |         |         |          |   |          |          |         |   |          |          |         |   |          |          |         |   |          |          |         |
|------------------------------------------------------------------------------------------------------------------------------------------------------------------------------------------------------------------------|----------------------------------------------------------------------------------------------------------------------------------------------------------------------------------------------------------------------------------------------------------------------------------------------------------------------------------------------------------------------------------------------------------------------------------------------------------------------------------------------------------------------------------------------------------------------------------------------------------------------------------------------------------------------------------------------------------------------------------------------------------------------------------------------------------------------------------------------------------------------------------------------------------------------------------------------------------------------------------------------------------------------------------------------------------------------------------------------------------------------------------------------------------------------------------------------------------------------------------------------------------------------------------------------------------------------------------------------------------------------------------------------------------------------------------------------------------------------------------------------------------------------------------------------------------------------------------------------------------------------------------------------------------------------------------------------------------------------------------------------------------------------------------------------------------------------------------------------------------------------------------------------------------------------------------------------------------------------------------------------------------------------------------------------------------------------------------------------------------------------------------------------------------------------------------------------------------------------------------------------------------------------------------------------------------------------------------------------------------------------------------------------------------------------------------------------------------------------------------------------------------------------------------------------------------------------------------------------------------------------------------------------------------------------------------------------------------------------------------------------------------------------------------------------------------------------------------------------------------------------------------------------------------------------------------------------------------------------------------------------------------------------------------------------------------------------------------------------------------------------------------------------------------------|----------|----------|----------|----------|---|----------|----------|----------|---|----------|----------|----------|---|----------|----------|----------|---|----------|---------|----------|---|----------|----------|----------|---|----------|----------|----------|---|----------|---------|----------|---|----------|---------|----------|---|---------|---------|---------|---|---------|---------|---------|---|----------|---------|----------|---|----------|---------|---------|---|---------|---------|---------|---|----------|---------|---------|---|---------|---------|---------|---|----------|----------|----------|---|----------|----------|----------|---|---------|---------|---------|---|----------|----------|---------|---|----------|---------|----------|---|---------|----------|---------|---|---------|----------|----------|---|---------|----------|----------|---|---------|----------|----------|---|---------|----------|----------|---|---------|----------|---------|---|---------|----------|---------|---|---------|----------|---------|---|---------|---------|---------|---|----------|----------|---------|---|----------|----------|---------|---|----------|----------|---------|---|----------|----------|---------|---|----------|----------|---------|---|----------|----------|---------|---|----------|----------|---------|---|----------|----------|---------|---|----------|----------|---------|---|----------|----------|----------|-----------------------------------------------------------------------------------------------------------------------------------------------------------------------------------------------------------------------|-----------------------------------------------------------------------------------------------------------------------------------------------------------------------------------------------------------------------------------------------------------------------------------------------------------------------------------------------------------------------------------------------------------------------------------------------------------------------------------------------------------------------------------------------------------------------------------------------------------------------------------------------------------------------------------------------------------------------------------------------------------------------------------------------------------------------------------------------------------------------------------------------------------------------------------------------------------------------------------------------------------------------------------------------------------------------------------------------------------------------------------------------------------------------------------------------------------------------------------------------------------------------------------------------------------------------------------------------------------------------------------------------------------------------------------------------------------------------------------------------------------------------------------------------------------------------------------------------------------------------------------------------------------------------------------------------------------------------------------------------------------------------------------------------------------------------------------------------------------------------------------------------------------------------------------------------------------------------------------------------------------------------------------------------------------------------------------------------------------------------------------------------------------------------------------------------------------------------------------------------------------------------------------------------------------------------------------------------------------------------------------------------------------------------------------------------------------------------------------------------------------------------------------------------------------------------------------------------------------------------------------------------------------------------------------------------------------------------------------------------------------------------------------------------------------------------------------------------------------------------------------------------------------------------------------------|----------|----------|----------|----------|---------|---------|----------|----------|---------|----------|-------------------------------------------------------------------------------------------------------------------------------------------------------------------------------------------------------------------------|-------------------------------------------------------------------------------------------------------------------------------------------------------------------------------------------------------------------------------------------------------------------------------------------------------------------------------------------------------------------------------------------------------------------------------------------------------------------------------------------------------------------------------------------------------------------------------------------------------------------------------------------------------------------------------------------------------------------------------------------------------------------------------------------------------------------------------------------------------------------------------------------------------------------------------------------------------------------------------------------------------------------------------------------------------------------------------------------------------------------------------------------------------------------------------------------------------------------------------------------------------------------------------------------------------------------------------------------------------------------------------------------------------------------------------------------------------------------------------------------------------------------------------------------------------------------------------------------------------------------------------------------------------------------------------------------------------------------------------------------------------------------------------------------------------------------------------------------------------------------------------------------------------------------------------------------------------------------------------------------------------------------------------------------------------------------------------------------------------------------------------------------------------------------------------------------------------------------------------------------------------------------------------------------------------------------------------------------------------------------------------------------------------------------------------------------------------------------------------------------------------------------------------------------------------------------------------------------------------------------------------------------------------------------------------------------------------------------------------------------------------------------------------------------------------------------------------------------------------------------------------------------------------------------------------------------------------------------------------------------------------------------------------------------------------------------------------------------------------------------------------------------------------------|---|----------|----------|----------|---|----------|----------|----------|---|----------|----------|----------|---|----------|----------|----------|---|----------|----------|----------|---|----------|----------|----------|---|----------|----------|----------|---|----------|---------|---------|---|----------|---------|---------|---|---------|---------|---------|---|----------|---------|---------|---|----------|---------|---------|---|---------|----------|----------|---|----------|----------|----------|---|---------|---------|---------|---|---------|----------|----------|---|----------|----------|----------|---|----------|---------|----------|---|----------|----------|----------|---|----------|----------|---------|---|----------|----------|---------|---|----------|----------|----------|---|---------|----------|---------|---|---------|----------|---------|---|---------|----------|----------|---|----------|----------|---------|---|----------|----------|----------|---|----------|----------|----------|---|----------|----------|----------|---|----------|----------|----------|---|----------|---------|----------|---|----------|---------|----------|---|----------|---------|----------|---|----------|---------|----------|---|----------|---------|----------|---|---------|----------|----------|---|---------|----------|----------|---|---------|---------|----------|---|---------|---------|----------|---|----------|----------|---------|---|----------|----------|---------|---|----------|----------|---------|---|----------|----------|---------|
| 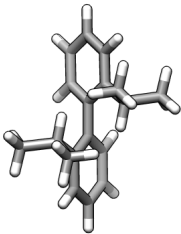 <p><b>2c</b><br/>                     -699.0317483<br/>                     -698.9248952<br/>                     -699.5920175</p>   | <table border="1"> <tbody> <tr><td>C</td><td>-1.57601</td><td>-1.88694</td><td>-0.92257</td></tr> <tr><td>C</td><td>-0.66838</td><td>-0.08937</td><td>1.02340</td></tr> <tr><td>C</td><td>-1.65643</td><td>-2.20331</td><td>0.42690</td></tr> <tr><td>C</td><td>-1.04320</td><td>-0.66192</td><td>-1.30964</td></tr> <tr><td>C</td><td>-0.59850</td><td>0.22481</td><td>-0.33841</td></tr> <tr><td>C</td><td>-1.20816</td><td>-1.32547</td><td>1.41679</td></tr> <tr><td>H</td><td>-2.08330</td><td>-3.15276</td><td>0.72376</td></tr> <tr><td>H</td><td>-0.18046</td><td>1.18029</td><td>-0.62873</td></tr> <tr><td>C</td><td>-0.19624</td><td>0.93356</td><td>1.99970</td></tr> <tr><td>C</td><td>0.61068</td><td>2.97160</td><td>3.74255</td></tr> <tr><td>C</td><td>0.93736</td><td>0.74797</td><td>2.80881</td></tr> <tr><td>C</td><td>-0.90132</td><td>2.13990</td><td>2.07562</td></tr> <tr><td>C</td><td>-0.51004</td><td>3.15394</td><td>2.93933</td></tr> <tr><td>C</td><td>1.32080</td><td>1.78093</td><td>3.66753</td></tr> <tr><td>H</td><td>-1.07517</td><td>4.07580</td><td>2.98542</td></tr> <tr><td>H</td><td>2.19961</td><td>1.64849</td><td>4.28553</td></tr> <tr><td>H</td><td>-0.97304</td><td>-0.39940</td><td>-2.35724</td></tr> <tr><td>H</td><td>-1.92928</td><td>-2.59011</td><td>-1.66584</td></tr> <tr><td>H</td><td>0.93145</td><td>3.75193</td><td>4.42069</td></tr> <tr><td>C</td><td>-1.37028</td><td>-1.70865</td><td>2.87556</td></tr> <tr><td>H</td><td>-1.77307</td><td>2.27081</td><td>1.44721</td></tr> <tr><td>C</td><td>1.78411</td><td>-0.50871</td><td>2.73740</td></tr> <tr><td>H</td><td>1.26302</td><td>-1.23660</td><td>2.11822</td></tr> <tr><td>C</td><td>2.00526</td><td>-1.14050</td><td>4.11640</td></tr> <tr><td>H</td><td>2.56701</td><td>-2.07201</td><td>4.01668</td></tr> <tr><td>H</td><td>1.05612</td><td>-1.36281</td><td>4.60559</td></tr> <tr><td>H</td><td>2.57586</td><td>-0.47302</td><td>4.76547</td></tr> <tr><td>C</td><td>3.12919</td><td>-0.20854</td><td>2.06080</td></tr> <tr><td>H</td><td>3.72878</td><td>-1.11886</td><td>1.98289</td></tr> <tr><td>H</td><td>3.69318</td><td>0.52474</td><td>2.64241</td></tr> <tr><td>H</td><td>2.97873</td><td>0.19599</td><td>1.05819</td></tr> <tr><td>H</td><td>-0.85502</td><td>-0.96642</td><td>3.48250</td></tr> <tr><td>C</td><td>-0.75631</td><td>-3.07749</td><td>3.18977</td></tr> <tr><td>H</td><td>0.29893</td><td>-3.10896</td><td>2.91588</td></tr> <tr><td>H</td><td>-1.27359</td><td>-3.87203</td><td>2.64796</td></tr> <tr><td>H</td><td>-0.84069</td><td>-3.29036</td><td>4.25786</td></tr> <tr><td>C</td><td>-2.85277</td><td>-1.67943</td><td>3.27369</td></tr> <tr><td>H</td><td>-3.41909</td><td>-2.40756</td><td>2.68795</td></tr> <tr><td>H</td><td>-3.28389</td><td>-0.69223</td><td>3.09730</td></tr> <tr><td>H</td><td>-2.96851</td><td>-1.92609</td><td>4.33202</td></tr> </tbody> </table>                                                                                                                                                                                                                           | C        | -1.57601 | -1.88694 | -0.92257 | C | -0.66838 | -0.08937 | 1.02340  | C | -1.65643 | -2.20331 | 0.42690  | C | -1.04320 | -0.66192 | -1.30964 | C | -0.59850 | 0.22481 | -0.33841 | C | -1.20816 | -1.32547 | 1.41679  | H | -2.08330 | -3.15276 | 0.72376  | H | -0.18046 | 1.18029 | -0.62873 | C | -0.19624 | 0.93356 | 1.99970  | C | 0.61068 | 2.97160 | 3.74255 | C | 0.93736 | 0.74797 | 2.80881 | C | -0.90132 | 2.13990 | 2.07562  | C | -0.51004 | 3.15394 | 2.93933 | C | 1.32080 | 1.78093 | 3.66753 | H | -1.07517 | 4.07580 | 2.98542 | H | 2.19961 | 1.64849 | 4.28553 | H | -0.97304 | -0.39940 | -2.35724 | H | -1.92928 | -2.59011 | -1.66584 | H | 0.93145 | 3.75193 | 4.42069 | C | -1.37028 | -1.70865 | 2.87556 | H | -1.77307 | 2.27081 | 1.44721  | C | 1.78411 | -0.50871 | 2.73740 | H | 1.26302 | -1.23660 | 2.11822  | C | 2.00526 | -1.14050 | 4.11640  | H | 2.56701 | -2.07201 | 4.01668  | H | 1.05612 | -1.36281 | 4.60559  | H | 2.57586 | -0.47302 | 4.76547 | C | 3.12919 | -0.20854 | 2.06080 | H | 3.72878 | -1.11886 | 1.98289 | H | 3.69318 | 0.52474 | 2.64241 | H | 2.97873  | 0.19599  | 1.05819 | H | -0.85502 | -0.96642 | 3.48250 | C | -0.75631 | -3.07749 | 3.18977 | H | 0.29893  | -3.10896 | 2.91588 | H | -1.27359 | -3.87203 | 2.64796 | H | -0.84069 | -3.29036 | 4.25786 | C | -2.85277 | -1.67943 | 3.27369 | H | -3.41909 | -2.40756 | 2.68795 | H | -3.28389 | -0.69223 | 3.09730 | H | -2.96851 | -1.92609 | 4.33202  |  <p><b>2c</b><br/>                     -698.9907467<br/>                     -698.8844798<br/>                     -699.5529723</p> | <table border="1"> <tbody> <tr><td>C</td><td>0.09409</td><td>-2.60939</td><td>-2.52548</td></tr> <tr><td>C</td><td>0.10921</td><td>-0.59489</td><td>-0.49398</td></tr> <tr><td>C</td><td>-0.01768</td><td>-2.92844</td><td>-1.18364</td></tr> <tr><td>C</td><td>0.38217</td><td>-1.29436</td><td>-2.85106</td></tr> <tr><td>C</td><td>0.39252</td><td>-0.33586</td><td>-1.85237</td></tr> <tr><td>C</td><td>0.06601</td><td>-1.98690</td><td>-0.15059</td></tr> <tr><td>H</td><td>-0.13268</td><td>-3.96920</td><td>-0.91563</td></tr> <tr><td>C</td><td>-0.07681</td><td>0.56386</td><td>0.45743</td></tr> <tr><td>C</td><td>-0.05556</td><td>2.57798</td><td>2.48912</td></tr> <tr><td>C</td><td>-0.03227</td><td>1.95583</td><td>0.11412</td></tr> <tr><td>C</td><td>-0.35903</td><td>0.30509</td><td>1.81609</td></tr> <tr><td>C</td><td>-0.34563</td><td>1.26344</td><td>2.81490</td></tr> <tr><td>C</td><td>0.05442</td><td>2.89710</td><td>1.14715</td></tr> <tr><td>H</td><td>-0.55829</td><td>0.97187</td><td>3.83519</td></tr> <tr><td>H</td><td>0.17126</td><td>3.93767</td><td>0.87914</td></tr> <tr><td>H</td><td>0.59562</td><td>-1.00256</td><td>-3.87112</td></tr> <tr><td>H</td><td>0.02251</td><td>-3.37878</td><td>-3.28300</td></tr> <tr><td>H</td><td>0.01871</td><td>3.34707</td><td>3.24669</td></tr> <tr><td>H</td><td>0.66208</td><td>0.65237</td><td>-2.15473</td></tr> <tr><td>H</td><td>-0.62938</td><td>-0.68283</td><td>2.11866</td></tr> <tr><td>C</td><td>-0.18612</td><td>2.57871</td><td>-1.27705</td></tr> <tr><td>C</td><td>-1.12203</td><td>-3.09821</td><td>1.80435</td></tr> <tr><td>H</td><td>-0.99507</td><td>-3.49877</td><td>2.81323</td></tr> <tr><td>H</td><td>-1.51395</td><td>-3.89524</td><td>1.16796</td></tr> <tr><td>H</td><td>-1.87130</td><td>-2.30508</td><td>1.83521</td></tr> <tr><td>C</td><td>1.23597</td><td>-3.76647</td><td>1.26073</td></tr> <tr><td>H</td><td>2.17327</td><td>-3.47363</td><td>0.78507</td></tr> <tr><td>H</td><td>0.86150</td><td>-4.65946</td><td>0.75847</td></tr> <tr><td>H</td><td>1.44226</td><td>-4.03681</td><td>2.29898</td></tr> <tr><td>H</td><td>-0.61384</td><td>1.83821</td><td>-1.94366</td></tr> <tr><td>C</td><td>-1.20249</td><td>3.73539</td><td>-1.29667</td></tr> <tr><td>H</td><td>-0.83063</td><td>4.62707</td><td>-0.79018</td></tr> <tr><td>H</td><td>-2.14114</td><td>3.44008</td><td>-0.82523</td></tr> <tr><td>H</td><td>-1.40545</td><td>4.00890</td><td>-2.33477</td></tr> <tr><td>C</td><td>1.15653</td><td>3.06861</td><td>-1.83901</td></tr> <tr><td>H</td><td>1.54715</td><td>3.86603</td><td>-1.20229</td></tr> <tr><td>H</td><td>1.03063</td><td>3.46884</td><td>-2.84815</td></tr> <tr><td>H</td><td>1.90627</td><td>2.27585</td><td>-1.86866</td></tr> <tr><td>C</td><td>0.22024</td><td>-2.60915</td><td>1.24085</td></tr> <tr><td>H</td><td>0.64887</td><td>-1.86825</td><td>1.90652</td></tr> </tbody> </table> | C        | 0.09409  | -2.60939 | -2.52548 | C       | 0.10921 | -0.59489 | -0.49398 | C       | -0.01768 | -2.92844                                                                                                                                                                                                                | -1.18364                                                                                                                                                                                                                                                                                                                                                                                                                                                                                                                                                                                                                                                                                                                                                                                                                                                                                                                                                                                                                                                                                                                                                                                                                                                                                                                                                                                                                                                                                                                                                                                                                                                                                                                                                                                                                                                                                                                                                                                                                                                                                                                                                                                                                                                                                                                                                                                                                                                                                                                                                                                                                                                                                                                                                                                                                                                                                                                                                                                                                                                                                                                                                    | C | 0.38217  | -1.29436 | -2.85106 | C | 0.39252  | -0.33586 | -1.85237 | C | 0.06601  | -1.98690 | -0.15059 | H | -0.13268 | -3.96920 | -0.91563 | C | -0.07681 | 0.56386  | 0.45743  | C | -0.05556 | 2.57798  | 2.48912  | C | -0.03227 | 1.95583  | 0.11412  | C | -0.35903 | 0.30509 | 1.81609 | C | -0.34563 | 1.26344 | 2.81490 | C | 0.05442 | 2.89710 | 1.14715 | H | -0.55829 | 0.97187 | 3.83519 | H | 0.17126  | 3.93767 | 0.87914 | H | 0.59562 | -1.00256 | -3.87112 | H | 0.02251  | -3.37878 | -3.28300 | H | 0.01871 | 3.34707 | 3.24669 | H | 0.66208 | 0.65237  | -2.15473 | H | -0.62938 | -0.68283 | 2.11866  | C | -0.18612 | 2.57871 | -1.27705 | C | -1.12203 | -3.09821 | 1.80435  | H | -0.99507 | -3.49877 | 2.81323 | H | -1.51395 | -3.89524 | 1.16796 | H | -1.87130 | -2.30508 | 1.83521  | C | 1.23597 | -3.76647 | 1.26073 | H | 2.17327 | -3.47363 | 0.78507 | H | 0.86150 | -4.65946 | 0.75847  | H | 1.44226  | -4.03681 | 2.29898 | H | -0.61384 | 1.83821  | -1.94366 | C | -1.20249 | 3.73539  | -1.29667 | H | -0.83063 | 4.62707  | -0.79018 | H | -2.14114 | 3.44008  | -0.82523 | H | -1.40545 | 4.00890 | -2.33477 | C | 1.15653  | 3.06861 | -1.83901 | H | 1.54715  | 3.86603 | -1.20229 | H | 1.03063  | 3.46884 | -2.84815 | H | 1.90627  | 2.27585 | -1.86866 | C | 0.22024 | -2.60915 | 1.24085  | H | 0.64887 | -1.86825 | 1.90652  |   |         |         |          |   |         |         |          |   |          |          |         |   |          |          |         |   |          |          |         |   |          |          |         |
| C                                                                                                                                                                                                                      | -1.57601                                                                                                                                                                                                                                                                                                                                                                                                                                                                                                                                                                                                                                                                                                                                                                                                                                                                                                                                                                                                                                                                                                                                                                                                                                                                                                                                                                                                                                                                                                                                                                                                                                                                                                                                                                                                                                                                                                                                                                                                                                                                                                                                                                                                                                                                                                                                                                                                                                                                                                                                                                                                                                                                                                                                                                                                                                                                                                                                                                                                                                                                                                                                                       | -1.88694 | -0.92257 |          |          |   |          |          |          |   |          |          |          |   |          |          |          |   |          |         |          |   |          |          |          |   |          |          |          |   |          |         |          |   |          |         |          |   |         |         |         |   |         |         |         |   |          |         |          |   |          |         |         |   |         |         |         |   |          |         |         |   |         |         |         |   |          |          |          |   |          |          |          |   |         |         |         |   |          |          |         |   |          |         |          |   |         |          |         |   |         |          |          |   |         |          |          |   |         |          |          |   |         |          |          |   |         |          |         |   |         |          |         |   |         |          |         |   |         |         |         |   |          |          |         |   |          |          |         |   |          |          |         |   |          |          |         |   |          |          |         |   |          |          |         |   |          |          |         |   |          |          |         |   |          |          |         |   |          |          |          |                                                                                                                                                                                                                       |                                                                                                                                                                                                                                                                                                                                                                                                                                                                                                                                                                                                                                                                                                                                                                                                                                                                                                                                                                                                                                                                                                                                                                                                                                                                                                                                                                                                                                                                                                                                                                                                                                                                                                                                                                                                                                                                                                                                                                                                                                                                                                                                                                                                                                                                                                                                                                                                                                                                                                                                                                                                                                                                                                                                                                                                                                                                                                                                         |          |          |          |          |         |         |          |          |         |          |                                                                                                                                                                                                                         |                                                                                                                                                                                                                                                                                                                                                                                                                                                                                                                                                                                                                                                                                                                                                                                                                                                                                                                                                                                                                                                                                                                                                                                                                                                                                                                                                                                                                                                                                                                                                                                                                                                                                                                                                                                                                                                                                                                                                                                                                                                                                                                                                                                                                                                                                                                                                                                                                                                                                                                                                                                                                                                                                                                                                                                                                                                                                                                                                                                                                                                                                                                                                             |   |          |          |          |   |          |          |          |   |          |          |          |   |          |          |          |   |          |          |          |   |          |          |          |   |          |          |          |   |          |         |         |   |          |         |         |   |         |         |         |   |          |         |         |   |          |         |         |   |         |          |          |   |          |          |          |   |         |         |         |   |         |          |          |   |          |          |          |   |          |         |          |   |          |          |          |   |          |          |         |   |          |          |         |   |          |          |          |   |         |          |         |   |         |          |         |   |         |          |          |   |          |          |         |   |          |          |          |   |          |          |          |   |          |          |          |   |          |          |          |   |          |         |          |   |          |         |          |   |          |         |          |   |          |         |          |   |          |         |          |   |         |          |          |   |         |          |          |   |         |         |          |   |         |         |          |   |          |          |         |   |          |          |         |   |          |          |         |   |          |          |         |
| C                                                                                                                                                                                                                      | -0.66838                                                                                                                                                                                                                                                                                                                                                                                                                                                                                                                                                                                                                                                                                                                                                                                                                                                                                                                                                                                                                                                                                                                                                                                                                                                                                                                                                                                                                                                                                                                                                                                                                                                                                                                                                                                                                                                                                                                                                                                                                                                                                                                                                                                                                                                                                                                                                                                                                                                                                                                                                                                                                                                                                                                                                                                                                                                                                                                                                                                                                                                                                                                                                       | -0.08937 | 1.02340  |          |          |   |          |          |          |   |          |          |          |   |          |          |          |   |          |         |          |   |          |          |          |   |          |          |          |   |          |         |          |   |          |         |          |   |         |         |         |   |         |         |         |   |          |         |          |   |          |         |         |   |         |         |         |   |          |         |         |   |         |         |         |   |          |          |          |   |          |          |          |   |         |         |         |   |          |          |         |   |          |         |          |   |         |          |         |   |         |          |          |   |         |          |          |   |         |          |          |   |         |          |          |   |         |          |         |   |         |          |         |   |         |          |         |   |         |         |         |   |          |          |         |   |          |          |         |   |          |          |         |   |          |          |         |   |          |          |         |   |          |          |         |   |          |          |         |   |          |          |         |   |          |          |         |   |          |          |          |                                                                                                                                                                                                                       |                                                                                                                                                                                                                                                                                                                                                                                                                                                                                                                                                                                                                                                                                                                                                                                                                                                                                                                                                                                                                                                                                                                                                                                                                                                                                                                                                                                                                                                                                                                                                                                                                                                                                                                                                                                                                                                                                                                                                                                                                                                                                                                                                                                                                                                                                                                                                                                                                                                                                                                                                                                                                                                                                                                                                                                                                                                                                                                                         |          |          |          |          |         |         |          |          |         |          |                                                                                                                                                                                                                         |                                                                                                                                                                                                                                                                                                                                                                                                                                                                                                                                                                                                                                                                                                                                                                                                                                                                                                                                                                                                                                                                                                                                                                                                                                                                                                                                                                                                                                                                                                                                                                                                                                                                                                                                                                                                                                                                                                                                                                                                                                                                                                                                                                                                                                                                                                                                                                                                                                                                                                                                                                                                                                                                                                                                                                                                                                                                                                                                                                                                                                                                                                                                                             |   |          |          |          |   |          |          |          |   |          |          |          |   |          |          |          |   |          |          |          |   |          |          |          |   |          |          |          |   |          |         |         |   |          |         |         |   |         |         |         |   |          |         |         |   |          |         |         |   |         |          |          |   |          |          |          |   |         |         |         |   |         |          |          |   |          |          |          |   |          |         |          |   |          |          |          |   |          |          |         |   |          |          |         |   |          |          |          |   |         |          |         |   |         |          |         |   |         |          |          |   |          |          |         |   |          |          |          |   |          |          |          |   |          |          |          |   |          |          |          |   |          |         |          |   |          |         |          |   |          |         |          |   |          |         |          |   |          |         |          |   |         |          |          |   |         |          |          |   |         |         |          |   |         |         |          |   |          |          |         |   |          |          |         |   |          |          |         |   |          |          |         |
| C                                                                                                                                                                                                                      | -1.65643                                                                                                                                                                                                                                                                                                                                                                                                                                                                                                                                                                                                                                                                                                                                                                                                                                                                                                                                                                                                                                                                                                                                                                                                                                                                                                                                                                                                                                                                                                                                                                                                                                                                                                                                                                                                                                                                                                                                                                                                                                                                                                                                                                                                                                                                                                                                                                                                                                                                                                                                                                                                                                                                                                                                                                                                                                                                                                                                                                                                                                                                                                                                                       | -2.20331 | 0.42690  |          |          |   |          |          |          |   |          |          |          |   |          |          |          |   |          |         |          |   |          |          |          |   |          |          |          |   |          |         |          |   |          |         |          |   |         |         |         |   |         |         |         |   |          |         |          |   |          |         |         |   |         |         |         |   |          |         |         |   |         |         |         |   |          |          |          |   |          |          |          |   |         |         |         |   |          |          |         |   |          |         |          |   |         |          |         |   |         |          |          |   |         |          |          |   |         |          |          |   |         |          |          |   |         |          |         |   |         |          |         |   |         |          |         |   |         |         |         |   |          |          |         |   |          |          |         |   |          |          |         |   |          |          |         |   |          |          |         |   |          |          |         |   |          |          |         |   |          |          |         |   |          |          |         |   |          |          |          |                                                                                                                                                                                                                       |                                                                                                                                                                                                                                                                                                                                                                                                                                                                                                                                                                                                                                                                                                                                                                                                                                                                                                                                                                                                                                                                                                                                                                                                                                                                                                                                                                                                                                                                                                                                                                                                                                                                                                                                                                                                                                                                                                                                                                                                                                                                                                                                                                                                                                                                                                                                                                                                                                                                                                                                                                                                                                                                                                                                                                                                                                                                                                                                         |          |          |          |          |         |         |          |          |         |          |                                                                                                                                                                                                                         |                                                                                                                                                                                                                                                                                                                                                                                                                                                                                                                                                                                                                                                                                                                                                                                                                                                                                                                                                                                                                                                                                                                                                                                                                                                                                                                                                                                                                                                                                                                                                                                                                                                                                                                                                                                                                                                                                                                                                                                                                                                                                                                                                                                                                                                                                                                                                                                                                                                                                                                                                                                                                                                                                                                                                                                                                                                                                                                                                                                                                                                                                                                                                             |   |          |          |          |   |          |          |          |   |          |          |          |   |          |          |          |   |          |          |          |   |          |          |          |   |          |          |          |   |          |         |         |   |          |         |         |   |         |         |         |   |          |         |         |   |          |         |         |   |         |          |          |   |          |          |          |   |         |         |         |   |         |          |          |   |          |          |          |   |          |         |          |   |          |          |          |   |          |          |         |   |          |          |         |   |          |          |          |   |         |          |         |   |         |          |         |   |         |          |          |   |          |          |         |   |          |          |          |   |          |          |          |   |          |          |          |   |          |          |          |   |          |         |          |   |          |         |          |   |          |         |          |   |          |         |          |   |          |         |          |   |         |          |          |   |         |          |          |   |         |         |          |   |         |         |          |   |          |          |         |   |          |          |         |   |          |          |         |   |          |          |         |
| C                                                                                                                                                                                                                      | -1.04320                                                                                                                                                                                                                                                                                                                                                                                                                                                                                                                                                                                                                                                                                                                                                                                                                                                                                                                                                                                                                                                                                                                                                                                                                                                                                                                                                                                                                                                                                                                                                                                                                                                                                                                                                                                                                                                                                                                                                                                                                                                                                                                                                                                                                                                                                                                                                                                                                                                                                                                                                                                                                                                                                                                                                                                                                                                                                                                                                                                                                                                                                                                                                       | -0.66192 | -1.30964 |          |          |   |          |          |          |   |          |          |          |   |          |          |          |   |          |         |          |   |          |          |          |   |          |          |          |   |          |         |          |   |          |         |          |   |         |         |         |   |         |         |         |   |          |         |          |   |          |         |         |   |         |         |         |   |          |         |         |   |         |         |         |   |          |          |          |   |          |          |          |   |         |         |         |   |          |          |         |   |          |         |          |   |         |          |         |   |         |          |          |   |         |          |          |   |         |          |          |   |         |          |          |   |         |          |         |   |         |          |         |   |         |          |         |   |         |         |         |   |          |          |         |   |          |          |         |   |          |          |         |   |          |          |         |   |          |          |         |   |          |          |         |   |          |          |         |   |          |          |         |   |          |          |         |   |          |          |          |                                                                                                                                                                                                                       |                                                                                                                                                                                                                                                                                                                                                                                                                                                                                                                                                                                                                                                                                                                                                                                                                                                                                                                                                                                                                                                                                                                                                                                                                                                                                                                                                                                                                                                                                                                                                                                                                                                                                                                                                                                                                                                                                                                                                                                                                                                                                                                                                                                                                                                                                                                                                                                                                                                                                                                                                                                                                                                                                                                                                                                                                                                                                                                                         |          |          |          |          |         |         |          |          |         |          |                                                                                                                                                                                                                         |                                                                                                                                                                                                                                                                                                                                                                                                                                                                                                                                                                                                                                                                                                                                                                                                                                                                                                                                                                                                                                                                                                                                                                                                                                                                                                                                                                                                                                                                                                                                                                                                                                                                                                                                                                                                                                                                                                                                                                                                                                                                                                                                                                                                                                                                                                                                                                                                                                                                                                                                                                                                                                                                                                                                                                                                                                                                                                                                                                                                                                                                                                                                                             |   |          |          |          |   |          |          |          |   |          |          |          |   |          |          |          |   |          |          |          |   |          |          |          |   |          |          |          |   |          |         |         |   |          |         |         |   |         |         |         |   |          |         |         |   |          |         |         |   |         |          |          |   |          |          |          |   |         |         |         |   |         |          |          |   |          |          |          |   |          |         |          |   |          |          |          |   |          |          |         |   |          |          |         |   |          |          |          |   |         |          |         |   |         |          |         |   |         |          |          |   |          |          |         |   |          |          |          |   |          |          |          |   |          |          |          |   |          |          |          |   |          |         |          |   |          |         |          |   |          |         |          |   |          |         |          |   |          |         |          |   |         |          |          |   |         |          |          |   |         |         |          |   |         |         |          |   |          |          |         |   |          |          |         |   |          |          |         |   |          |          |         |
| C                                                                                                                                                                                                                      | -0.59850                                                                                                                                                                                                                                                                                                                                                                                                                                                                                                                                                                                                                                                                                                                                                                                                                                                                                                                                                                                                                                                                                                                                                                                                                                                                                                                                                                                                                                                                                                                                                                                                                                                                                                                                                                                                                                                                                                                                                                                                                                                                                                                                                                                                                                                                                                                                                                                                                                                                                                                                                                                                                                                                                                                                                                                                                                                                                                                                                                                                                                                                                                                                                       | 0.22481  | -0.33841 |          |          |   |          |          |          |   |          |          |          |   |          |          |          |   |          |         |          |   |          |          |          |   |          |          |          |   |          |         |          |   |          |         |          |   |         |         |         |   |         |         |         |   |          |         |          |   |          |         |         |   |         |         |         |   |          |         |         |   |         |         |         |   |          |          |          |   |          |          |          |   |         |         |         |   |          |          |         |   |          |         |          |   |         |          |         |   |         |          |          |   |         |          |          |   |         |          |          |   |         |          |          |   |         |          |         |   |         |          |         |   |         |          |         |   |         |         |         |   |          |          |         |   |          |          |         |   |          |          |         |   |          |          |         |   |          |          |         |   |          |          |         |   |          |          |         |   |          |          |         |   |          |          |         |   |          |          |          |                                                                                                                                                                                                                       |                                                                                                                                                                                                                                                                                                                                                                                                                                                                                                                                                                                                                                                                                                                                                                                                                                                                                                                                                                                                                                                                                                                                                                                                                                                                                                                                                                                                                                                                                                                                                                                                                                                                                                                                                                                                                                                                                                                                                                                                                                                                                                                                                                                                                                                                                                                                                                                                                                                                                                                                                                                                                                                                                                                                                                                                                                                                                                                                         |          |          |          |          |         |         |          |          |         |          |                                                                                                                                                                                                                         |                                                                                                                                                                                                                                                                                                                                                                                                                                                                                                                                                                                                                                                                                                                                                                                                                                                                                                                                                                                                                                                                                                                                                                                                                                                                                                                                                                                                                                                                                                                                                                                                                                                                                                                                                                                                                                                                                                                                                                                                                                                                                                                                                                                                                                                                                                                                                                                                                                                                                                                                                                                                                                                                                                                                                                                                                                                                                                                                                                                                                                                                                                                                                             |   |          |          |          |   |          |          |          |   |          |          |          |   |          |          |          |   |          |          |          |   |          |          |          |   |          |          |          |   |          |         |         |   |          |         |         |   |         |         |         |   |          |         |         |   |          |         |         |   |         |          |          |   |          |          |          |   |         |         |         |   |         |          |          |   |          |          |          |   |          |         |          |   |          |          |          |   |          |          |         |   |          |          |         |   |          |          |          |   |         |          |         |   |         |          |         |   |         |          |          |   |          |          |         |   |          |          |          |   |          |          |          |   |          |          |          |   |          |          |          |   |          |         |          |   |          |         |          |   |          |         |          |   |          |         |          |   |          |         |          |   |         |          |          |   |         |          |          |   |         |         |          |   |         |         |          |   |          |          |         |   |          |          |         |   |          |          |         |   |          |          |         |
| C                                                                                                                                                                                                                      | -1.20816                                                                                                                                                                                                                                                                                                                                                                                                                                                                                                                                                                                                                                                                                                                                                                                                                                                                                                                                                                                                                                                                                                                                                                                                                                                                                                                                                                                                                                                                                                                                                                                                                                                                                                                                                                                                                                                                                                                                                                                                                                                                                                                                                                                                                                                                                                                                                                                                                                                                                                                                                                                                                                                                                                                                                                                                                                                                                                                                                                                                                                                                                                                                                       | -1.32547 | 1.41679  |          |          |   |          |          |          |   |          |          |          |   |          |          |          |   |          |         |          |   |          |          |          |   |          |          |          |   |          |         |          |   |          |         |          |   |         |         |         |   |         |         |         |   |          |         |          |   |          |         |         |   |         |         |         |   |          |         |         |   |         |         |         |   |          |          |          |   |          |          |          |   |         |         |         |   |          |          |         |   |          |         |          |   |         |          |         |   |         |          |          |   |         |          |          |   |         |          |          |   |         |          |          |   |         |          |         |   |         |          |         |   |         |          |         |   |         |         |         |   |          |          |         |   |          |          |         |   |          |          |         |   |          |          |         |   |          |          |         |   |          |          |         |   |          |          |         |   |          |          |         |   |          |          |         |   |          |          |          |                                                                                                                                                                                                                       |                                                                                                                                                                                                                                                                                                                                                                                                                                                                                                                                                                                                                                                                                                                                                                                                                                                                                                                                                                                                                                                                                                                                                                                                                                                                                                                                                                                                                                                                                                                                                                                                                                                                                                                                                                                                                                                                                                                                                                                                                                                                                                                                                                                                                                                                                                                                                                                                                                                                                                                                                                                                                                                                                                                                                                                                                                                                                                                                         |          |          |          |          |         |         |          |          |         |          |                                                                                                                                                                                                                         |                                                                                                                                                                                                                                                                                                                                                                                                                                                                                                                                                                                                                                                                                                                                                                                                                                                                                                                                                                                                                                                                                                                                                                                                                                                                                                                                                                                                                                                                                                                                                                                                                                                                                                                                                                                                                                                                                                                                                                                                                                                                                                                                                                                                                                                                                                                                                                                                                                                                                                                                                                                                                                                                                                                                                                                                                                                                                                                                                                                                                                                                                                                                                             |   |          |          |          |   |          |          |          |   |          |          |          |   |          |          |          |   |          |          |          |   |          |          |          |   |          |          |          |   |          |         |         |   |          |         |         |   |         |         |         |   |          |         |         |   |          |         |         |   |         |          |          |   |          |          |          |   |         |         |         |   |         |          |          |   |          |          |          |   |          |         |          |   |          |          |          |   |          |          |         |   |          |          |         |   |          |          |          |   |         |          |         |   |         |          |         |   |         |          |          |   |          |          |         |   |          |          |          |   |          |          |          |   |          |          |          |   |          |          |          |   |          |         |          |   |          |         |          |   |          |         |          |   |          |         |          |   |          |         |          |   |         |          |          |   |         |          |          |   |         |         |          |   |         |         |          |   |          |          |         |   |          |          |         |   |          |          |         |   |          |          |         |
| H                                                                                                                                                                                                                      | -2.08330                                                                                                                                                                                                                                                                                                                                                                                                                                                                                                                                                                                                                                                                                                                                                                                                                                                                                                                                                                                                                                                                                                                                                                                                                                                                                                                                                                                                                                                                                                                                                                                                                                                                                                                                                                                                                                                                                                                                                                                                                                                                                                                                                                                                                                                                                                                                                                                                                                                                                                                                                                                                                                                                                                                                                                                                                                                                                                                                                                                                                                                                                                                                                       | -3.15276 | 0.72376  |          |          |   |          |          |          |   |          |          |          |   |          |          |          |   |          |         |          |   |          |          |          |   |          |          |          |   |          |         |          |   |          |         |          |   |         |         |         |   |         |         |         |   |          |         |          |   |          |         |         |   |         |         |         |   |          |         |         |   |         |         |         |   |          |          |          |   |          |          |          |   |         |         |         |   |          |          |         |   |          |         |          |   |         |          |         |   |         |          |          |   |         |          |          |   |         |          |          |   |         |          |          |   |         |          |         |   |         |          |         |   |         |          |         |   |         |         |         |   |          |          |         |   |          |          |         |   |          |          |         |   |          |          |         |   |          |          |         |   |          |          |         |   |          |          |         |   |          |          |         |   |          |          |         |   |          |          |          |                                                                                                                                                                                                                       |                                                                                                                                                                                                                                                                                                                                                                                                                                                                                                                                                                                                                                                                                                                                                                                                                                                                                                                                                                                                                                                                                                                                                                                                                                                                                                                                                                                                                                                                                                                                                                                                                                                                                                                                                                                                                                                                                                                                                                                                                                                                                                                                                                                                                                                                                                                                                                                                                                                                                                                                                                                                                                                                                                                                                                                                                                                                                                                                         |          |          |          |          |         |         |          |          |         |          |                                                                                                                                                                                                                         |                                                                                                                                                                                                                                                                                                                                                                                                                                                                                                                                                                                                                                                                                                                                                                                                                                                                                                                                                                                                                                                                                                                                                                                                                                                                                                                                                                                                                                                                                                                                                                                                                                                                                                                                                                                                                                                                                                                                                                                                                                                                                                                                                                                                                                                                                                                                                                                                                                                                                                                                                                                                                                                                                                                                                                                                                                                                                                                                                                                                                                                                                                                                                             |   |          |          |          |   |          |          |          |   |          |          |          |   |          |          |          |   |          |          |          |   |          |          |          |   |          |          |          |   |          |         |         |   |          |         |         |   |         |         |         |   |          |         |         |   |          |         |         |   |         |          |          |   |          |          |          |   |         |         |         |   |         |          |          |   |          |          |          |   |          |         |          |   |          |          |          |   |          |          |         |   |          |          |         |   |          |          |          |   |         |          |         |   |         |          |         |   |         |          |          |   |          |          |         |   |          |          |          |   |          |          |          |   |          |          |          |   |          |          |          |   |          |         |          |   |          |         |          |   |          |         |          |   |          |         |          |   |          |         |          |   |         |          |          |   |         |          |          |   |         |         |          |   |         |         |          |   |          |          |         |   |          |          |         |   |          |          |         |   |          |          |         |
| H                                                                                                                                                                                                                      | -0.18046                                                                                                                                                                                                                                                                                                                                                                                                                                                                                                                                                                                                                                                                                                                                                                                                                                                                                                                                                                                                                                                                                                                                                                                                                                                                                                                                                                                                                                                                                                                                                                                                                                                                                                                                                                                                                                                                                                                                                                                                                                                                                                                                                                                                                                                                                                                                                                                                                                                                                                                                                                                                                                                                                                                                                                                                                                                                                                                                                                                                                                                                                                                                                       | 1.18029  | -0.62873 |          |          |   |          |          |          |   |          |          |          |   |          |          |          |   |          |         |          |   |          |          |          |   |          |          |          |   |          |         |          |   |          |         |          |   |         |         |         |   |         |         |         |   |          |         |          |   |          |         |         |   |         |         |         |   |          |         |         |   |         |         |         |   |          |          |          |   |          |          |          |   |         |         |         |   |          |          |         |   |          |         |          |   |         |          |         |   |         |          |          |   |         |          |          |   |         |          |          |   |         |          |          |   |         |          |         |   |         |          |         |   |         |          |         |   |         |         |         |   |          |          |         |   |          |          |         |   |          |          |         |   |          |          |         |   |          |          |         |   |          |          |         |   |          |          |         |   |          |          |         |   |          |          |         |   |          |          |          |                                                                                                                                                                                                                       |                                                                                                                                                                                                                                                                                                                                                                                                                                                                                                                                                                                                                                                                                                                                                                                                                                                                                                                                                                                                                                                                                                                                                                                                                                                                                                                                                                                                                                                                                                                                                                                                                                                                                                                                                                                                                                                                                                                                                                                                                                                                                                                                                                                                                                                                                                                                                                                                                                                                                                                                                                                                                                                                                                                                                                                                                                                                                                                                         |          |          |          |          |         |         |          |          |         |          |                                                                                                                                                                                                                         |                                                                                                                                                                                                                                                                                                                                                                                                                                                                                                                                                                                                                                                                                                                                                                                                                                                                                                                                                                                                                                                                                                                                                                                                                                                                                                                                                                                                                                                                                                                                                                                                                                                                                                                                                                                                                                                                                                                                                                                                                                                                                                                                                                                                                                                                                                                                                                                                                                                                                                                                                                                                                                                                                                                                                                                                                                                                                                                                                                                                                                                                                                                                                             |   |          |          |          |   |          |          |          |   |          |          |          |   |          |          |          |   |          |          |          |   |          |          |          |   |          |          |          |   |          |         |         |   |          |         |         |   |         |         |         |   |          |         |         |   |          |         |         |   |         |          |          |   |          |          |          |   |         |         |         |   |         |          |          |   |          |          |          |   |          |         |          |   |          |          |          |   |          |          |         |   |          |          |         |   |          |          |          |   |         |          |         |   |         |          |         |   |         |          |          |   |          |          |         |   |          |          |          |   |          |          |          |   |          |          |          |   |          |          |          |   |          |         |          |   |          |         |          |   |          |         |          |   |          |         |          |   |          |         |          |   |         |          |          |   |         |          |          |   |         |         |          |   |         |         |          |   |          |          |         |   |          |          |         |   |          |          |         |   |          |          |         |
| C                                                                                                                                                                                                                      | -0.19624                                                                                                                                                                                                                                                                                                                                                                                                                                                                                                                                                                                                                                                                                                                                                                                                                                                                                                                                                                                                                                                                                                                                                                                                                                                                                                                                                                                                                                                                                                                                                                                                                                                                                                                                                                                                                                                                                                                                                                                                                                                                                                                                                                                                                                                                                                                                                                                                                                                                                                                                                                                                                                                                                                                                                                                                                                                                                                                                                                                                                                                                                                                                                       | 0.93356  | 1.99970  |          |          |   |          |          |          |   |          |          |          |   |          |          |          |   |          |         |          |   |          |          |          |   |          |          |          |   |          |         |          |   |          |         |          |   |         |         |         |   |         |         |         |   |          |         |          |   |          |         |         |   |         |         |         |   |          |         |         |   |         |         |         |   |          |          |          |   |          |          |          |   |         |         |         |   |          |          |         |   |          |         |          |   |         |          |         |   |         |          |          |   |         |          |          |   |         |          |          |   |         |          |          |   |         |          |         |   |         |          |         |   |         |          |         |   |         |         |         |   |          |          |         |   |          |          |         |   |          |          |         |   |          |          |         |   |          |          |         |   |          |          |         |   |          |          |         |   |          |          |         |   |          |          |         |   |          |          |          |                                                                                                                                                                                                                       |                                                                                                                                                                                                                                                                                                                                                                                                                                                                                                                                                                                                                                                                                                                                                                                                                                                                                                                                                                                                                                                                                                                                                                                                                                                                                                                                                                                                                                                                                                                                                                                                                                                                                                                                                                                                                                                                                                                                                                                                                                                                                                                                                                                                                                                                                                                                                                                                                                                                                                                                                                                                                                                                                                                                                                                                                                                                                                                                         |          |          |          |          |         |         |          |          |         |          |                                                                                                                                                                                                                         |                                                                                                                                                                                                                                                                                                                                                                                                                                                                                                                                                                                                                                                                                                                                                                                                                                                                                                                                                                                                                                                                                                                                                                                                                                                                                                                                                                                                                                                                                                                                                                                                                                                                                                                                                                                                                                                                                                                                                                                                                                                                                                                                                                                                                                                                                                                                                                                                                                                                                                                                                                                                                                                                                                                                                                                                                                                                                                                                                                                                                                                                                                                                                             |   |          |          |          |   |          |          |          |   |          |          |          |   |          |          |          |   |          |          |          |   |          |          |          |   |          |          |          |   |          |         |         |   |          |         |         |   |         |         |         |   |          |         |         |   |          |         |         |   |         |          |          |   |          |          |          |   |         |         |         |   |         |          |          |   |          |          |          |   |          |         |          |   |          |          |          |   |          |          |         |   |          |          |         |   |          |          |          |   |         |          |         |   |         |          |         |   |         |          |          |   |          |          |         |   |          |          |          |   |          |          |          |   |          |          |          |   |          |          |          |   |          |         |          |   |          |         |          |   |          |         |          |   |          |         |          |   |          |         |          |   |         |          |          |   |         |          |          |   |         |         |          |   |         |         |          |   |          |          |         |   |          |          |         |   |          |          |         |   |          |          |         |
| C                                                                                                                                                                                                                      | 0.61068                                                                                                                                                                                                                                                                                                                                                                                                                                                                                                                                                                                                                                                                                                                                                                                                                                                                                                                                                                                                                                                                                                                                                                                                                                                                                                                                                                                                                                                                                                                                                                                                                                                                                                                                                                                                                                                                                                                                                                                                                                                                                                                                                                                                                                                                                                                                                                                                                                                                                                                                                                                                                                                                                                                                                                                                                                                                                                                                                                                                                                                                                                                                                        | 2.97160  | 3.74255  |          |          |   |          |          |          |   |          |          |          |   |          |          |          |   |          |         |          |   |          |          |          |   |          |          |          |   |          |         |          |   |          |         |          |   |         |         |         |   |         |         |         |   |          |         |          |   |          |         |         |   |         |         |         |   |          |         |         |   |         |         |         |   |          |          |          |   |          |          |          |   |         |         |         |   |          |          |         |   |          |         |          |   |         |          |         |   |         |          |          |   |         |          |          |   |         |          |          |   |         |          |          |   |         |          |         |   |         |          |         |   |         |          |         |   |         |         |         |   |          |          |         |   |          |          |         |   |          |          |         |   |          |          |         |   |          |          |         |   |          |          |         |   |          |          |         |   |          |          |         |   |          |          |         |   |          |          |          |                                                                                                                                                                                                                       |                                                                                                                                                                                                                                                                                                                                                                                                                                                                                                                                                                                                                                                                                                                                                                                                                                                                                                                                                                                                                                                                                                                                                                                                                                                                                                                                                                                                                                                                                                                                                                                                                                                                                                                                                                                                                                                                                                                                                                                                                                                                                                                                                                                                                                                                                                                                                                                                                                                                                                                                                                                                                                                                                                                                                                                                                                                                                                                                         |          |          |          |          |         |         |          |          |         |          |                                                                                                                                                                                                                         |                                                                                                                                                                                                                                                                                                                                                                                                                                                                                                                                                                                                                                                                                                                                                                                                                                                                                                                                                                                                                                                                                                                                                                                                                                                                                                                                                                                                                                                                                                                                                                                                                                                                                                                                                                                                                                                                                                                                                                                                                                                                                                                                                                                                                                                                                                                                                                                                                                                                                                                                                                                                                                                                                                                                                                                                                                                                                                                                                                                                                                                                                                                                                             |   |          |          |          |   |          |          |          |   |          |          |          |   |          |          |          |   |          |          |          |   |          |          |          |   |          |          |          |   |          |         |         |   |          |         |         |   |         |         |         |   |          |         |         |   |          |         |         |   |         |          |          |   |          |          |          |   |         |         |         |   |         |          |          |   |          |          |          |   |          |         |          |   |          |          |          |   |          |          |         |   |          |          |         |   |          |          |          |   |         |          |         |   |         |          |         |   |         |          |          |   |          |          |         |   |          |          |          |   |          |          |          |   |          |          |          |   |          |          |          |   |          |         |          |   |          |         |          |   |          |         |          |   |          |         |          |   |          |         |          |   |         |          |          |   |         |          |          |   |         |         |          |   |         |         |          |   |          |          |         |   |          |          |         |   |          |          |         |   |          |          |         |
| C                                                                                                                                                                                                                      | 0.93736                                                                                                                                                                                                                                                                                                                                                                                                                                                                                                                                                                                                                                                                                                                                                                                                                                                                                                                                                                                                                                                                                                                                                                                                                                                                                                                                                                                                                                                                                                                                                                                                                                                                                                                                                                                                                                                                                                                                                                                                                                                                                                                                                                                                                                                                                                                                                                                                                                                                                                                                                                                                                                                                                                                                                                                                                                                                                                                                                                                                                                                                                                                                                        | 0.74797  | 2.80881  |          |          |   |          |          |          |   |          |          |          |   |          |          |          |   |          |         |          |   |          |          |          |   |          |          |          |   |          |         |          |   |          |         |          |   |         |         |         |   |         |         |         |   |          |         |          |   |          |         |         |   |         |         |         |   |          |         |         |   |         |         |         |   |          |          |          |   |          |          |          |   |         |         |         |   |          |          |         |   |          |         |          |   |         |          |         |   |         |          |          |   |         |          |          |   |         |          |          |   |         |          |          |   |         |          |         |   |         |          |         |   |         |          |         |   |         |         |         |   |          |          |         |   |          |          |         |   |          |          |         |   |          |          |         |   |          |          |         |   |          |          |         |   |          |          |         |   |          |          |         |   |          |          |         |   |          |          |          |                                                                                                                                                                                                                       |                                                                                                                                                                                                                                                                                                                                                                                                                                                                                                                                                                                                                                                                                                                                                                                                                                                                                                                                                                                                                                                                                                                                                                                                                                                                                                                                                                                                                                                                                                                                                                                                                                                                                                                                                                                                                                                                                                                                                                                                                                                                                                                                                                                                                                                                                                                                                                                                                                                                                                                                                                                                                                                                                                                                                                                                                                                                                                                                         |          |          |          |          |         |         |          |          |         |          |                                                                                                                                                                                                                         |                                                                                                                                                                                                                                                                                                                                                                                                                                                                                                                                                                                                                                                                                                                                                                                                                                                                                                                                                                                                                                                                                                                                                                                                                                                                                                                                                                                                                                                                                                                                                                                                                                                                                                                                                                                                                                                                                                                                                                                                                                                                                                                                                                                                                                                                                                                                                                                                                                                                                                                                                                                                                                                                                                                                                                                                                                                                                                                                                                                                                                                                                                                                                             |   |          |          |          |   |          |          |          |   |          |          |          |   |          |          |          |   |          |          |          |   |          |          |          |   |          |          |          |   |          |         |         |   |          |         |         |   |         |         |         |   |          |         |         |   |          |         |         |   |         |          |          |   |          |          |          |   |         |         |         |   |         |          |          |   |          |          |          |   |          |         |          |   |          |          |          |   |          |          |         |   |          |          |         |   |          |          |          |   |         |          |         |   |         |          |         |   |         |          |          |   |          |          |         |   |          |          |          |   |          |          |          |   |          |          |          |   |          |          |          |   |          |         |          |   |          |         |          |   |          |         |          |   |          |         |          |   |          |         |          |   |         |          |          |   |         |          |          |   |         |         |          |   |         |         |          |   |          |          |         |   |          |          |         |   |          |          |         |   |          |          |         |
| C                                                                                                                                                                                                                      | -0.90132                                                                                                                                                                                                                                                                                                                                                                                                                                                                                                                                                                                                                                                                                                                                                                                                                                                                                                                                                                                                                                                                                                                                                                                                                                                                                                                                                                                                                                                                                                                                                                                                                                                                                                                                                                                                                                                                                                                                                                                                                                                                                                                                                                                                                                                                                                                                                                                                                                                                                                                                                                                                                                                                                                                                                                                                                                                                                                                                                                                                                                                                                                                                                       | 2.13990  | 2.07562  |          |          |   |          |          |          |   |          |          |          |   |          |          |          |   |          |         |          |   |          |          |          |   |          |          |          |   |          |         |          |   |          |         |          |   |         |         |         |   |         |         |         |   |          |         |          |   |          |         |         |   |         |         |         |   |          |         |         |   |         |         |         |   |          |          |          |   |          |          |          |   |         |         |         |   |          |          |         |   |          |         |          |   |         |          |         |   |         |          |          |   |         |          |          |   |         |          |          |   |         |          |          |   |         |          |         |   |         |          |         |   |         |          |         |   |         |         |         |   |          |          |         |   |          |          |         |   |          |          |         |   |          |          |         |   |          |          |         |   |          |          |         |   |          |          |         |   |          |          |         |   |          |          |         |   |          |          |          |                                                                                                                                                                                                                       |                                                                                                                                                                                                                                                                                                                                                                                                                                                                                                                                                                                                                                                                                                                                                                                                                                                                                                                                                                                                                                                                                                                                                                                                                                                                                                                                                                                                                                                                                                                                                                                                                                                                                                                                                                                                                                                                                                                                                                                                                                                                                                                                                                                                                                                                                                                                                                                                                                                                                                                                                                                                                                                                                                                                                                                                                                                                                                                                         |          |          |          |          |         |         |          |          |         |          |                                                                                                                                                                                                                         |                                                                                                                                                                                                                                                                                                                                                                                                                                                                                                                                                                                                                                                                                                                                                                                                                                                                                                                                                                                                                                                                                                                                                                                                                                                                                                                                                                                                                                                                                                                                                                                                                                                                                                                                                                                                                                                                                                                                                                                                                                                                                                                                                                                                                                                                                                                                                                                                                                                                                                                                                                                                                                                                                                                                                                                                                                                                                                                                                                                                                                                                                                                                                             |   |          |          |          |   |          |          |          |   |          |          |          |   |          |          |          |   |          |          |          |   |          |          |          |   |          |          |          |   |          |         |         |   |          |         |         |   |         |         |         |   |          |         |         |   |          |         |         |   |         |          |          |   |          |          |          |   |         |         |         |   |         |          |          |   |          |          |          |   |          |         |          |   |          |          |          |   |          |          |         |   |          |          |         |   |          |          |          |   |         |          |         |   |         |          |         |   |         |          |          |   |          |          |         |   |          |          |          |   |          |          |          |   |          |          |          |   |          |          |          |   |          |         |          |   |          |         |          |   |          |         |          |   |          |         |          |   |          |         |          |   |         |          |          |   |         |          |          |   |         |         |          |   |         |         |          |   |          |          |         |   |          |          |         |   |          |          |         |   |          |          |         |
| C                                                                                                                                                                                                                      | -0.51004                                                                                                                                                                                                                                                                                                                                                                                                                                                                                                                                                                                                                                                                                                                                                                                                                                                                                                                                                                                                                                                                                                                                                                                                                                                                                                                                                                                                                                                                                                                                                                                                                                                                                                                                                                                                                                                                                                                                                                                                                                                                                                                                                                                                                                                                                                                                                                                                                                                                                                                                                                                                                                                                                                                                                                                                                                                                                                                                                                                                                                                                                                                                                       | 3.15394  | 2.93933  |          |          |   |          |          |          |   |          |          |          |   |          |          |          |   |          |         |          |   |          |          |          |   |          |          |          |   |          |         |          |   |          |         |          |   |         |         |         |   |         |         |         |   |          |         |          |   |          |         |         |   |         |         |         |   |          |         |         |   |         |         |         |   |          |          |          |   |          |          |          |   |         |         |         |   |          |          |         |   |          |         |          |   |         |          |         |   |         |          |          |   |         |          |          |   |         |          |          |   |         |          |          |   |         |          |         |   |         |          |         |   |         |          |         |   |         |         |         |   |          |          |         |   |          |          |         |   |          |          |         |   |          |          |         |   |          |          |         |   |          |          |         |   |          |          |         |   |          |          |         |   |          |          |         |   |          |          |          |                                                                                                                                                                                                                       |                                                                                                                                                                                                                                                                                                                                                                                                                                                                                                                                                                                                                                                                                                                                                                                                                                                                                                                                                                                                                                                                                                                                                                                                                                                                                                                                                                                                                                                                                                                                                                                                                                                                                                                                                                                                                                                                                                                                                                                                                                                                                                                                                                                                                                                                                                                                                                                                                                                                                                                                                                                                                                                                                                                                                                                                                                                                                                                                         |          |          |          |          |         |         |          |          |         |          |                                                                                                                                                                                                                         |                                                                                                                                                                                                                                                                                                                                                                                                                                                                                                                                                                                                                                                                                                                                                                                                                                                                                                                                                                                                                                                                                                                                                                                                                                                                                                                                                                                                                                                                                                                                                                                                                                                                                                                                                                                                                                                                                                                                                                                                                                                                                                                                                                                                                                                                                                                                                                                                                                                                                                                                                                                                                                                                                                                                                                                                                                                                                                                                                                                                                                                                                                                                                             |   |          |          |          |   |          |          |          |   |          |          |          |   |          |          |          |   |          |          |          |   |          |          |          |   |          |          |          |   |          |         |         |   |          |         |         |   |         |         |         |   |          |         |         |   |          |         |         |   |         |          |          |   |          |          |          |   |         |         |         |   |         |          |          |   |          |          |          |   |          |         |          |   |          |          |          |   |          |          |         |   |          |          |         |   |          |          |          |   |         |          |         |   |         |          |         |   |         |          |          |   |          |          |         |   |          |          |          |   |          |          |          |   |          |          |          |   |          |          |          |   |          |         |          |   |          |         |          |   |          |         |          |   |          |         |          |   |          |         |          |   |         |          |          |   |         |          |          |   |         |         |          |   |         |         |          |   |          |          |         |   |          |          |         |   |          |          |         |   |          |          |         |
| C                                                                                                                                                                                                                      | 1.32080                                                                                                                                                                                                                                                                                                                                                                                                                                                                                                                                                                                                                                                                                                                                                                                                                                                                                                                                                                                                                                                                                                                                                                                                                                                                                                                                                                                                                                                                                                                                                                                                                                                                                                                                                                                                                                                                                                                                                                                                                                                                                                                                                                                                                                                                                                                                                                                                                                                                                                                                                                                                                                                                                                                                                                                                                                                                                                                                                                                                                                                                                                                                                        | 1.78093  | 3.66753  |          |          |   |          |          |          |   |          |          |          |   |          |          |          |   |          |         |          |   |          |          |          |   |          |          |          |   |          |         |          |   |          |         |          |   |         |         |         |   |         |         |         |   |          |         |          |   |          |         |         |   |         |         |         |   |          |         |         |   |         |         |         |   |          |          |          |   |          |          |          |   |         |         |         |   |          |          |         |   |          |         |          |   |         |          |         |   |         |          |          |   |         |          |          |   |         |          |          |   |         |          |          |   |         |          |         |   |         |          |         |   |         |          |         |   |         |         |         |   |          |          |         |   |          |          |         |   |          |          |         |   |          |          |         |   |          |          |         |   |          |          |         |   |          |          |         |   |          |          |         |   |          |          |         |   |          |          |          |                                                                                                                                                                                                                       |                                                                                                                                                                                                                                                                                                                                                                                                                                                                                                                                                                                                                                                                                                                                                                                                                                                                                                                                                                                                                                                                                                                                                                                                                                                                                                                                                                                                                                                                                                                                                                                                                                                                                                                                                                                                                                                                                                                                                                                                                                                                                                                                                                                                                                                                                                                                                                                                                                                                                                                                                                                                                                                                                                                                                                                                                                                                                                                                         |          |          |          |          |         |         |          |          |         |          |                                                                                                                                                                                                                         |                                                                                                                                                                                                                                                                                                                                                                                                                                                                                                                                                                                                                                                                                                                                                                                                                                                                                                                                                                                                                                                                                                                                                                                                                                                                                                                                                                                                                                                                                                                                                                                                                                                                                                                                                                                                                                                                                                                                                                                                                                                                                                                                                                                                                                                                                                                                                                                                                                                                                                                                                                                                                                                                                                                                                                                                                                                                                                                                                                                                                                                                                                                                                             |   |          |          |          |   |          |          |          |   |          |          |          |   |          |          |          |   |          |          |          |   |          |          |          |   |          |          |          |   |          |         |         |   |          |         |         |   |         |         |         |   |          |         |         |   |          |         |         |   |         |          |          |   |          |          |          |   |         |         |         |   |         |          |          |   |          |          |          |   |          |         |          |   |          |          |          |   |          |          |         |   |          |          |         |   |          |          |          |   |         |          |         |   |         |          |         |   |         |          |          |   |          |          |         |   |          |          |          |   |          |          |          |   |          |          |          |   |          |          |          |   |          |         |          |   |          |         |          |   |          |         |          |   |          |         |          |   |          |         |          |   |         |          |          |   |         |          |          |   |         |         |          |   |         |         |          |   |          |          |         |   |          |          |         |   |          |          |         |   |          |          |         |
| H                                                                                                                                                                                                                      | -1.07517                                                                                                                                                                                                                                                                                                                                                                                                                                                                                                                                                                                                                                                                                                                                                                                                                                                                                                                                                                                                                                                                                                                                                                                                                                                                                                                                                                                                                                                                                                                                                                                                                                                                                                                                                                                                                                                                                                                                                                                                                                                                                                                                                                                                                                                                                                                                                                                                                                                                                                                                                                                                                                                                                                                                                                                                                                                                                                                                                                                                                                                                                                                                                       | 4.07580  | 2.98542  |          |          |   |          |          |          |   |          |          |          |   |          |          |          |   |          |         |          |   |          |          |          |   |          |          |          |   |          |         |          |   |          |         |          |   |         |         |         |   |         |         |         |   |          |         |          |   |          |         |         |   |         |         |         |   |          |         |         |   |         |         |         |   |          |          |          |   |          |          |          |   |         |         |         |   |          |          |         |   |          |         |          |   |         |          |         |   |         |          |          |   |         |          |          |   |         |          |          |   |         |          |          |   |         |          |         |   |         |          |         |   |         |          |         |   |         |         |         |   |          |          |         |   |          |          |         |   |          |          |         |   |          |          |         |   |          |          |         |   |          |          |         |   |          |          |         |   |          |          |         |   |          |          |         |   |          |          |          |                                                                                                                                                                                                                       |                                                                                                                                                                                                                                                                                                                                                                                                                                                                                                                                                                                                                                                                                                                                                                                                                                                                                                                                                                                                                                                                                                                                                                                                                                                                                                                                                                                                                                                                                                                                                                                                                                                                                                                                                                                                                                                                                                                                                                                                                                                                                                                                                                                                                                                                                                                                                                                                                                                                                                                                                                                                                                                                                                                                                                                                                                                                                                                                         |          |          |          |          |         |         |          |          |         |          |                                                                                                                                                                                                                         |                                                                                                                                                                                                                                                                                                                                                                                                                                                                                                                                                                                                                                                                                                                                                                                                                                                                                                                                                                                                                                                                                                                                                                                                                                                                                                                                                                                                                                                                                                                                                                                                                                                                                                                                                                                                                                                                                                                                                                                                                                                                                                                                                                                                                                                                                                                                                                                                                                                                                                                                                                                                                                                                                                                                                                                                                                                                                                                                                                                                                                                                                                                                                             |   |          |          |          |   |          |          |          |   |          |          |          |   |          |          |          |   |          |          |          |   |          |          |          |   |          |          |          |   |          |         |         |   |          |         |         |   |         |         |         |   |          |         |         |   |          |         |         |   |         |          |          |   |          |          |          |   |         |         |         |   |         |          |          |   |          |          |          |   |          |         |          |   |          |          |          |   |          |          |         |   |          |          |         |   |          |          |          |   |         |          |         |   |         |          |         |   |         |          |          |   |          |          |         |   |          |          |          |   |          |          |          |   |          |          |          |   |          |          |          |   |          |         |          |   |          |         |          |   |          |         |          |   |          |         |          |   |          |         |          |   |         |          |          |   |         |          |          |   |         |         |          |   |         |         |          |   |          |          |         |   |          |          |         |   |          |          |         |   |          |          |         |
| H                                                                                                                                                                                                                      | 2.19961                                                                                                                                                                                                                                                                                                                                                                                                                                                                                                                                                                                                                                                                                                                                                                                                                                                                                                                                                                                                                                                                                                                                                                                                                                                                                                                                                                                                                                                                                                                                                                                                                                                                                                                                                                                                                                                                                                                                                                                                                                                                                                                                                                                                                                                                                                                                                                                                                                                                                                                                                                                                                                                                                                                                                                                                                                                                                                                                                                                                                                                                                                                                                        | 1.64849  | 4.28553  |          |          |   |          |          |          |   |          |          |          |   |          |          |          |   |          |         |          |   |          |          |          |   |          |          |          |   |          |         |          |   |          |         |          |   |         |         |         |   |         |         |         |   |          |         |          |   |          |         |         |   |         |         |         |   |          |         |         |   |         |         |         |   |          |          |          |   |          |          |          |   |         |         |         |   |          |          |         |   |          |         |          |   |         |          |         |   |         |          |          |   |         |          |          |   |         |          |          |   |         |          |          |   |         |          |         |   |         |          |         |   |         |          |         |   |         |         |         |   |          |          |         |   |          |          |         |   |          |          |         |   |          |          |         |   |          |          |         |   |          |          |         |   |          |          |         |   |          |          |         |   |          |          |         |   |          |          |          |                                                                                                                                                                                                                       |                                                                                                                                                                                                                                                                                                                                                                                                                                                                                                                                                                                                                                                                                                                                                                                                                                                                                                                                                                                                                                                                                                                                                                                                                                                                                                                                                                                                                                                                                                                                                                                                                                                                                                                                                                                                                                                                                                                                                                                                                                                                                                                                                                                                                                                                                                                                                                                                                                                                                                                                                                                                                                                                                                                                                                                                                                                                                                                                         |          |          |          |          |         |         |          |          |         |          |                                                                                                                                                                                                                         |                                                                                                                                                                                                                                                                                                                                                                                                                                                                                                                                                                                                                                                                                                                                                                                                                                                                                                                                                                                                                                                                                                                                                                                                                                                                                                                                                                                                                                                                                                                                                                                                                                                                                                                                                                                                                                                                                                                                                                                                                                                                                                                                                                                                                                                                                                                                                                                                                                                                                                                                                                                                                                                                                                                                                                                                                                                                                                                                                                                                                                                                                                                                                             |   |          |          |          |   |          |          |          |   |          |          |          |   |          |          |          |   |          |          |          |   |          |          |          |   |          |          |          |   |          |         |         |   |          |         |         |   |         |         |         |   |          |         |         |   |          |         |         |   |         |          |          |   |          |          |          |   |         |         |         |   |         |          |          |   |          |          |          |   |          |         |          |   |          |          |          |   |          |          |         |   |          |          |         |   |          |          |          |   |         |          |         |   |         |          |         |   |         |          |          |   |          |          |         |   |          |          |          |   |          |          |          |   |          |          |          |   |          |          |          |   |          |         |          |   |          |         |          |   |          |         |          |   |          |         |          |   |          |         |          |   |         |          |          |   |         |          |          |   |         |         |          |   |         |         |          |   |          |          |         |   |          |          |         |   |          |          |         |   |          |          |         |
| H                                                                                                                                                                                                                      | -0.97304                                                                                                                                                                                                                                                                                                                                                                                                                                                                                                                                                                                                                                                                                                                                                                                                                                                                                                                                                                                                                                                                                                                                                                                                                                                                                                                                                                                                                                                                                                                                                                                                                                                                                                                                                                                                                                                                                                                                                                                                                                                                                                                                                                                                                                                                                                                                                                                                                                                                                                                                                                                                                                                                                                                                                                                                                                                                                                                                                                                                                                                                                                                                                       | -0.39940 | -2.35724 |          |          |   |          |          |          |   |          |          |          |   |          |          |          |   |          |         |          |   |          |          |          |   |          |          |          |   |          |         |          |   |          |         |          |   |         |         |         |   |         |         |         |   |          |         |          |   |          |         |         |   |         |         |         |   |          |         |         |   |         |         |         |   |          |          |          |   |          |          |          |   |         |         |         |   |          |          |         |   |          |         |          |   |         |          |         |   |         |          |          |   |         |          |          |   |         |          |          |   |         |          |          |   |         |          |         |   |         |          |         |   |         |          |         |   |         |         |         |   |          |          |         |   |          |          |         |   |          |          |         |   |          |          |         |   |          |          |         |   |          |          |         |   |          |          |         |   |          |          |         |   |          |          |         |   |          |          |          |                                                                                                                                                                                                                       |                                                                                                                                                                                                                                                                                                                                                                                                                                                                                                                                                                                                                                                                                                                                                                                                                                                                                                                                                                                                                                                                                                                                                                                                                                                                                                                                                                                                                                                                                                                                                                                                                                                                                                                                                                                                                                                                                                                                                                                                                                                                                                                                                                                                                                                                                                                                                                                                                                                                                                                                                                                                                                                                                                                                                                                                                                                                                                                                         |          |          |          |          |         |         |          |          |         |          |                                                                                                                                                                                                                         |                                                                                                                                                                                                                                                                                                                                                                                                                                                                                                                                                                                                                                                                                                                                                                                                                                                                                                                                                                                                                                                                                                                                                                                                                                                                                                                                                                                                                                                                                                                                                                                                                                                                                                                                                                                                                                                                                                                                                                                                                                                                                                                                                                                                                                                                                                                                                                                                                                                                                                                                                                                                                                                                                                                                                                                                                                                                                                                                                                                                                                                                                                                                                             |   |          |          |          |   |          |          |          |   |          |          |          |   |          |          |          |   |          |          |          |   |          |          |          |   |          |          |          |   |          |         |         |   |          |         |         |   |         |         |         |   |          |         |         |   |          |         |         |   |         |          |          |   |          |          |          |   |         |         |         |   |         |          |          |   |          |          |          |   |          |         |          |   |          |          |          |   |          |          |         |   |          |          |         |   |          |          |          |   |         |          |         |   |         |          |         |   |         |          |          |   |          |          |         |   |          |          |          |   |          |          |          |   |          |          |          |   |          |          |          |   |          |         |          |   |          |         |          |   |          |         |          |   |          |         |          |   |          |         |          |   |         |          |          |   |         |          |          |   |         |         |          |   |         |         |          |   |          |          |         |   |          |          |         |   |          |          |         |   |          |          |         |
| H                                                                                                                                                                                                                      | -1.92928                                                                                                                                                                                                                                                                                                                                                                                                                                                                                                                                                                                                                                                                                                                                                                                                                                                                                                                                                                                                                                                                                                                                                                                                                                                                                                                                                                                                                                                                                                                                                                                                                                                                                                                                                                                                                                                                                                                                                                                                                                                                                                                                                                                                                                                                                                                                                                                                                                                                                                                                                                                                                                                                                                                                                                                                                                                                                                                                                                                                                                                                                                                                                       | -2.59011 | -1.66584 |          |          |   |          |          |          |   |          |          |          |   |          |          |          |   |          |         |          |   |          |          |          |   |          |          |          |   |          |         |          |   |          |         |          |   |         |         |         |   |         |         |         |   |          |         |          |   |          |         |         |   |         |         |         |   |          |         |         |   |         |         |         |   |          |          |          |   |          |          |          |   |         |         |         |   |          |          |         |   |          |         |          |   |         |          |         |   |         |          |          |   |         |          |          |   |         |          |          |   |         |          |          |   |         |          |         |   |         |          |         |   |         |          |         |   |         |         |         |   |          |          |         |   |          |          |         |   |          |          |         |   |          |          |         |   |          |          |         |   |          |          |         |   |          |          |         |   |          |          |         |   |          |          |         |   |          |          |          |                                                                                                                                                                                                                       |                                                                                                                                                                                                                                                                                                                                                                                                                                                                                                                                                                                                                                                                                                                                                                                                                                                                                                                                                                                                                                                                                                                                                                                                                                                                                                                                                                                                                                                                                                                                                                                                                                                                                                                                                                                                                                                                                                                                                                                                                                                                                                                                                                                                                                                                                                                                                                                                                                                                                                                                                                                                                                                                                                                                                                                                                                                                                                                                         |          |          |          |          |         |         |          |          |         |          |                                                                                                                                                                                                                         |                                                                                                                                                                                                                                                                                                                                                                                                                                                                                                                                                                                                                                                                                                                                                                                                                                                                                                                                                                                                                                                                                                                                                                                                                                                                                                                                                                                                                                                                                                                                                                                                                                                                                                                                                                                                                                                                                                                                                                                                                                                                                                                                                                                                                                                                                                                                                                                                                                                                                                                                                                                                                                                                                                                                                                                                                                                                                                                                                                                                                                                                                                                                                             |   |          |          |          |   |          |          |          |   |          |          |          |   |          |          |          |   |          |          |          |   |          |          |          |   |          |          |          |   |          |         |         |   |          |         |         |   |         |         |         |   |          |         |         |   |          |         |         |   |         |          |          |   |          |          |          |   |         |         |         |   |         |          |          |   |          |          |          |   |          |         |          |   |          |          |          |   |          |          |         |   |          |          |         |   |          |          |          |   |         |          |         |   |         |          |         |   |         |          |          |   |          |          |         |   |          |          |          |   |          |          |          |   |          |          |          |   |          |          |          |   |          |         |          |   |          |         |          |   |          |         |          |   |          |         |          |   |          |         |          |   |         |          |          |   |         |          |          |   |         |         |          |   |         |         |          |   |          |          |         |   |          |          |         |   |          |          |         |   |          |          |         |
| H                                                                                                                                                                                                                      | 0.93145                                                                                                                                                                                                                                                                                                                                                                                                                                                                                                                                                                                                                                                                                                                                                                                                                                                                                                                                                                                                                                                                                                                                                                                                                                                                                                                                                                                                                                                                                                                                                                                                                                                                                                                                                                                                                                                                                                                                                                                                                                                                                                                                                                                                                                                                                                                                                                                                                                                                                                                                                                                                                                                                                                                                                                                                                                                                                                                                                                                                                                                                                                                                                        | 3.75193  | 4.42069  |          |          |   |          |          |          |   |          |          |          |   |          |          |          |   |          |         |          |   |          |          |          |   |          |          |          |   |          |         |          |   |          |         |          |   |         |         |         |   |         |         |         |   |          |         |          |   |          |         |         |   |         |         |         |   |          |         |         |   |         |         |         |   |          |          |          |   |          |          |          |   |         |         |         |   |          |          |         |   |          |         |          |   |         |          |         |   |         |          |          |   |         |          |          |   |         |          |          |   |         |          |          |   |         |          |         |   |         |          |         |   |         |          |         |   |         |         |         |   |          |          |         |   |          |          |         |   |          |          |         |   |          |          |         |   |          |          |         |   |          |          |         |   |          |          |         |   |          |          |         |   |          |          |         |   |          |          |          |                                                                                                                                                                                                                       |                                                                                                                                                                                                                                                                                                                                                                                                                                                                                                                                                                                                                                                                                                                                                                                                                                                                                                                                                                                                                                                                                                                                                                                                                                                                                                                                                                                                                                                                                                                                                                                                                                                                                                                                                                                                                                                                                                                                                                                                                                                                                                                                                                                                                                                                                                                                                                                                                                                                                                                                                                                                                                                                                                                                                                                                                                                                                                                                         |          |          |          |          |         |         |          |          |         |          |                                                                                                                                                                                                                         |                                                                                                                                                                                                                                                                                                                                                                                                                                                                                                                                                                                                                                                                                                                                                                                                                                                                                                                                                                                                                                                                                                                                                                                                                                                                                                                                                                                                                                                                                                                                                                                                                                                                                                                                                                                                                                                                                                                                                                                                                                                                                                                                                                                                                                                                                                                                                                                                                                                                                                                                                                                                                                                                                                                                                                                                                                                                                                                                                                                                                                                                                                                                                             |   |          |          |          |   |          |          |          |   |          |          |          |   |          |          |          |   |          |          |          |   |          |          |          |   |          |          |          |   |          |         |         |   |          |         |         |   |         |         |         |   |          |         |         |   |          |         |         |   |         |          |          |   |          |          |          |   |         |         |         |   |         |          |          |   |          |          |          |   |          |         |          |   |          |          |          |   |          |          |         |   |          |          |         |   |          |          |          |   |         |          |         |   |         |          |         |   |         |          |          |   |          |          |         |   |          |          |          |   |          |          |          |   |          |          |          |   |          |          |          |   |          |         |          |   |          |         |          |   |          |         |          |   |          |         |          |   |          |         |          |   |         |          |          |   |         |          |          |   |         |         |          |   |         |         |          |   |          |          |         |   |          |          |         |   |          |          |         |   |          |          |         |
| C                                                                                                                                                                                                                      | -1.37028                                                                                                                                                                                                                                                                                                                                                                                                                                                                                                                                                                                                                                                                                                                                                                                                                                                                                                                                                                                                                                                                                                                                                                                                                                                                                                                                                                                                                                                                                                                                                                                                                                                                                                                                                                                                                                                                                                                                                                                                                                                                                                                                                                                                                                                                                                                                                                                                                                                                                                                                                                                                                                                                                                                                                                                                                                                                                                                                                                                                                                                                                                                                                       | -1.70865 | 2.87556  |          |          |   |          |          |          |   |          |          |          |   |          |          |          |   |          |         |          |   |          |          |          |   |          |          |          |   |          |         |          |   |          |         |          |   |         |         |         |   |         |         |         |   |          |         |          |   |          |         |         |   |         |         |         |   |          |         |         |   |         |         |         |   |          |          |          |   |          |          |          |   |         |         |         |   |          |          |         |   |          |         |          |   |         |          |         |   |         |          |          |   |         |          |          |   |         |          |          |   |         |          |          |   |         |          |         |   |         |          |         |   |         |          |         |   |         |         |         |   |          |          |         |   |          |          |         |   |          |          |         |   |          |          |         |   |          |          |         |   |          |          |         |   |          |          |         |   |          |          |         |   |          |          |         |   |          |          |          |                                                                                                                                                                                                                       |                                                                                                                                                                                                                                                                                                                                                                                                                                                                                                                                                                                                                                                                                                                                                                                                                                                                                                                                                                                                                                                                                                                                                                                                                                                                                                                                                                                                                                                                                                                                                                                                                                                                                                                                                                                                                                                                                                                                                                                                                                                                                                                                                                                                                                                                                                                                                                                                                                                                                                                                                                                                                                                                                                                                                                                                                                                                                                                                         |          |          |          |          |         |         |          |          |         |          |                                                                                                                                                                                                                         |                                                                                                                                                                                                                                                                                                                                                                                                                                                                                                                                                                                                                                                                                                                                                                                                                                                                                                                                                                                                                                                                                                                                                                                                                                                                                                                                                                                                                                                                                                                                                                                                                                                                                                                                                                                                                                                                                                                                                                                                                                                                                                                                                                                                                                                                                                                                                                                                                                                                                                                                                                                                                                                                                                                                                                                                                                                                                                                                                                                                                                                                                                                                                             |   |          |          |          |   |          |          |          |   |          |          |          |   |          |          |          |   |          |          |          |   |          |          |          |   |          |          |          |   |          |         |         |   |          |         |         |   |         |         |         |   |          |         |         |   |          |         |         |   |         |          |          |   |          |          |          |   |         |         |         |   |         |          |          |   |          |          |          |   |          |         |          |   |          |          |          |   |          |          |         |   |          |          |         |   |          |          |          |   |         |          |         |   |         |          |         |   |         |          |          |   |          |          |         |   |          |          |          |   |          |          |          |   |          |          |          |   |          |          |          |   |          |         |          |   |          |         |          |   |          |         |          |   |          |         |          |   |          |         |          |   |         |          |          |   |         |          |          |   |         |         |          |   |         |         |          |   |          |          |         |   |          |          |         |   |          |          |         |   |          |          |         |
| H                                                                                                                                                                                                                      | -1.77307                                                                                                                                                                                                                                                                                                                                                                                                                                                                                                                                                                                                                                                                                                                                                                                                                                                                                                                                                                                                                                                                                                                                                                                                                                                                                                                                                                                                                                                                                                                                                                                                                                                                                                                                                                                                                                                                                                                                                                                                                                                                                                                                                                                                                                                                                                                                                                                                                                                                                                                                                                                                                                                                                                                                                                                                                                                                                                                                                                                                                                                                                                                                                       | 2.27081  | 1.44721  |          |          |   |          |          |          |   |          |          |          |   |          |          |          |   |          |         |          |   |          |          |          |   |          |          |          |   |          |         |          |   |          |         |          |   |         |         |         |   |         |         |         |   |          |         |          |   |          |         |         |   |         |         |         |   |          |         |         |   |         |         |         |   |          |          |          |   |          |          |          |   |         |         |         |   |          |          |         |   |          |         |          |   |         |          |         |   |         |          |          |   |         |          |          |   |         |          |          |   |         |          |          |   |         |          |         |   |         |          |         |   |         |          |         |   |         |         |         |   |          |          |         |   |          |          |         |   |          |          |         |   |          |          |         |   |          |          |         |   |          |          |         |   |          |          |         |   |          |          |         |   |          |          |         |   |          |          |          |                                                                                                                                                                                                                       |                                                                                                                                                                                                                                                                                                                                                                                                                                                                                                                                                                                                                                                                                                                                                                                                                                                                                                                                                                                                                                                                                                                                                                                                                                                                                                                                                                                                                                                                                                                                                                                                                                                                                                                                                                                                                                                                                                                                                                                                                                                                                                                                                                                                                                                                                                                                                                                                                                                                                                                                                                                                                                                                                                                                                                                                                                                                                                                                         |          |          |          |          |         |         |          |          |         |          |                                                                                                                                                                                                                         |                                                                                                                                                                                                                                                                                                                                                                                                                                                                                                                                                                                                                                                                                                                                                                                                                                                                                                                                                                                                                                                                                                                                                                                                                                                                                                                                                                                                                                                                                                                                                                                                                                                                                                                                                                                                                                                                                                                                                                                                                                                                                                                                                                                                                                                                                                                                                                                                                                                                                                                                                                                                                                                                                                                                                                                                                                                                                                                                                                                                                                                                                                                                                             |   |          |          |          |   |          |          |          |   |          |          |          |   |          |          |          |   |          |          |          |   |          |          |          |   |          |          |          |   |          |         |         |   |          |         |         |   |         |         |         |   |          |         |         |   |          |         |         |   |         |          |          |   |          |          |          |   |         |         |         |   |         |          |          |   |          |          |          |   |          |         |          |   |          |          |          |   |          |          |         |   |          |          |         |   |          |          |          |   |         |          |         |   |         |          |         |   |         |          |          |   |          |          |         |   |          |          |          |   |          |          |          |   |          |          |          |   |          |          |          |   |          |         |          |   |          |         |          |   |          |         |          |   |          |         |          |   |          |         |          |   |         |          |          |   |         |          |          |   |         |         |          |   |         |         |          |   |          |          |         |   |          |          |         |   |          |          |         |   |          |          |         |
| C                                                                                                                                                                                                                      | 1.78411                                                                                                                                                                                                                                                                                                                                                                                                                                                                                                                                                                                                                                                                                                                                                                                                                                                                                                                                                                                                                                                                                                                                                                                                                                                                                                                                                                                                                                                                                                                                                                                                                                                                                                                                                                                                                                                                                                                                                                                                                                                                                                                                                                                                                                                                                                                                                                                                                                                                                                                                                                                                                                                                                                                                                                                                                                                                                                                                                                                                                                                                                                                                                        | -0.50871 | 2.73740  |          |          |   |          |          |          |   |          |          |          |   |          |          |          |   |          |         |          |   |          |          |          |   |          |          |          |   |          |         |          |   |          |         |          |   |         |         |         |   |         |         |         |   |          |         |          |   |          |         |         |   |         |         |         |   |          |         |         |   |         |         |         |   |          |          |          |   |          |          |          |   |         |         |         |   |          |          |         |   |          |         |          |   |         |          |         |   |         |          |          |   |         |          |          |   |         |          |          |   |         |          |          |   |         |          |         |   |         |          |         |   |         |          |         |   |         |         |         |   |          |          |         |   |          |          |         |   |          |          |         |   |          |          |         |   |          |          |         |   |          |          |         |   |          |          |         |   |          |          |         |   |          |          |         |   |          |          |          |                                                                                                                                                                                                                       |                                                                                                                                                                                                                                                                                                                                                                                                                                                                                                                                                                                                                                                                                                                                                                                                                                                                                                                                                                                                                                                                                                                                                                                                                                                                                                                                                                                                                                                                                                                                                                                                                                                                                                                                                                                                                                                                                                                                                                                                                                                                                                                                                                                                                                                                                                                                                                                                                                                                                                                                                                                                                                                                                                                                                                                                                                                                                                                                         |          |          |          |          |         |         |          |          |         |          |                                                                                                                                                                                                                         |                                                                                                                                                                                                                                                                                                                                                                                                                                                                                                                                                                                                                                                                                                                                                                                                                                                                                                                                                                                                                                                                                                                                                                                                                                                                                                                                                                                                                                                                                                                                                                                                                                                                                                                                                                                                                                                                                                                                                                                                                                                                                                                                                                                                                                                                                                                                                                                                                                                                                                                                                                                                                                                                                                                                                                                                                                                                                                                                                                                                                                                                                                                                                             |   |          |          |          |   |          |          |          |   |          |          |          |   |          |          |          |   |          |          |          |   |          |          |          |   |          |          |          |   |          |         |         |   |          |         |         |   |         |         |         |   |          |         |         |   |          |         |         |   |         |          |          |   |          |          |          |   |         |         |         |   |         |          |          |   |          |          |          |   |          |         |          |   |          |          |          |   |          |          |         |   |          |          |         |   |          |          |          |   |         |          |         |   |         |          |         |   |         |          |          |   |          |          |         |   |          |          |          |   |          |          |          |   |          |          |          |   |          |          |          |   |          |         |          |   |          |         |          |   |          |         |          |   |          |         |          |   |          |         |          |   |         |          |          |   |         |          |          |   |         |         |          |   |         |         |          |   |          |          |         |   |          |          |         |   |          |          |         |   |          |          |         |
| H                                                                                                                                                                                                                      | 1.26302                                                                                                                                                                                                                                                                                                                                                                                                                                                                                                                                                                                                                                                                                                                                                                                                                                                                                                                                                                                                                                                                                                                                                                                                                                                                                                                                                                                                                                                                                                                                                                                                                                                                                                                                                                                                                                                                                                                                                                                                                                                                                                                                                                                                                                                                                                                                                                                                                                                                                                                                                                                                                                                                                                                                                                                                                                                                                                                                                                                                                                                                                                                                                        | -1.23660 | 2.11822  |          |          |   |          |          |          |   |          |          |          |   |          |          |          |   |          |         |          |   |          |          |          |   |          |          |          |   |          |         |          |   |          |         |          |   |         |         |         |   |         |         |         |   |          |         |          |   |          |         |         |   |         |         |         |   |          |         |         |   |         |         |         |   |          |          |          |   |          |          |          |   |         |         |         |   |          |          |         |   |          |         |          |   |         |          |         |   |         |          |          |   |         |          |          |   |         |          |          |   |         |          |          |   |         |          |         |   |         |          |         |   |         |          |         |   |         |         |         |   |          |          |         |   |          |          |         |   |          |          |         |   |          |          |         |   |          |          |         |   |          |          |         |   |          |          |         |   |          |          |         |   |          |          |         |   |          |          |          |                                                                                                                                                                                                                       |                                                                                                                                                                                                                                                                                                                                                                                                                                                                                                                                                                                                                                                                                                                                                                                                                                                                                                                                                                                                                                                                                                                                                                                                                                                                                                                                                                                                                                                                                                                                                                                                                                                                                                                                                                                                                                                                                                                                                                                                                                                                                                                                                                                                                                                                                                                                                                                                                                                                                                                                                                                                                                                                                                                                                                                                                                                                                                                                         |          |          |          |          |         |         |          |          |         |          |                                                                                                                                                                                                                         |                                                                                                                                                                                                                                                                                                                                                                                                                                                                                                                                                                                                                                                                                                                                                                                                                                                                                                                                                                                                                                                                                                                                                                                                                                                                                                                                                                                                                                                                                                                                                                                                                                                                                                                                                                                                                                                                                                                                                                                                                                                                                                                                                                                                                                                                                                                                                                                                                                                                                                                                                                                                                                                                                                                                                                                                                                                                                                                                                                                                                                                                                                                                                             |   |          |          |          |   |          |          |          |   |          |          |          |   |          |          |          |   |          |          |          |   |          |          |          |   |          |          |          |   |          |         |         |   |          |         |         |   |         |         |         |   |          |         |         |   |          |         |         |   |         |          |          |   |          |          |          |   |         |         |         |   |         |          |          |   |          |          |          |   |          |         |          |   |          |          |          |   |          |          |         |   |          |          |         |   |          |          |          |   |         |          |         |   |         |          |         |   |         |          |          |   |          |          |         |   |          |          |          |   |          |          |          |   |          |          |          |   |          |          |          |   |          |         |          |   |          |         |          |   |          |         |          |   |          |         |          |   |          |         |          |   |         |          |          |   |         |          |          |   |         |         |          |   |         |         |          |   |          |          |         |   |          |          |         |   |          |          |         |   |          |          |         |
| C                                                                                                                                                                                                                      | 2.00526                                                                                                                                                                                                                                                                                                                                                                                                                                                                                                                                                                                                                                                                                                                                                                                                                                                                                                                                                                                                                                                                                                                                                                                                                                                                                                                                                                                                                                                                                                                                                                                                                                                                                                                                                                                                                                                                                                                                                                                                                                                                                                                                                                                                                                                                                                                                                                                                                                                                                                                                                                                                                                                                                                                                                                                                                                                                                                                                                                                                                                                                                                                                                        | -1.14050 | 4.11640  |          |          |   |          |          |          |   |          |          |          |   |          |          |          |   |          |         |          |   |          |          |          |   |          |          |          |   |          |         |          |   |          |         |          |   |         |         |         |   |         |         |         |   |          |         |          |   |          |         |         |   |         |         |         |   |          |         |         |   |         |         |         |   |          |          |          |   |          |          |          |   |         |         |         |   |          |          |         |   |          |         |          |   |         |          |         |   |         |          |          |   |         |          |          |   |         |          |          |   |         |          |          |   |         |          |         |   |         |          |         |   |         |          |         |   |         |         |         |   |          |          |         |   |          |          |         |   |          |          |         |   |          |          |         |   |          |          |         |   |          |          |         |   |          |          |         |   |          |          |         |   |          |          |         |   |          |          |          |                                                                                                                                                                                                                       |                                                                                                                                                                                                                                                                                                                                                                                                                                                                                                                                                                                                                                                                                                                                                                                                                                                                                                                                                                                                                                                                                                                                                                                                                                                                                                                                                                                                                                                                                                                                                                                                                                                                                                                                                                                                                                                                                                                                                                                                                                                                                                                                                                                                                                                                                                                                                                                                                                                                                                                                                                                                                                                                                                                                                                                                                                                                                                                                         |          |          |          |          |         |         |          |          |         |          |                                                                                                                                                                                                                         |                                                                                                                                                                                                                                                                                                                                                                                                                                                                                                                                                                                                                                                                                                                                                                                                                                                                                                                                                                                                                                                                                                                                                                                                                                                                                                                                                                                                                                                                                                                                                                                                                                                                                                                                                                                                                                                                                                                                                                                                                                                                                                                                                                                                                                                                                                                                                                                                                                                                                                                                                                                                                                                                                                                                                                                                                                                                                                                                                                                                                                                                                                                                                             |   |          |          |          |   |          |          |          |   |          |          |          |   |          |          |          |   |          |          |          |   |          |          |          |   |          |          |          |   |          |         |         |   |          |         |         |   |         |         |         |   |          |         |         |   |          |         |         |   |         |          |          |   |          |          |          |   |         |         |         |   |         |          |          |   |          |          |          |   |          |         |          |   |          |          |          |   |          |          |         |   |          |          |         |   |          |          |          |   |         |          |         |   |         |          |         |   |         |          |          |   |          |          |         |   |          |          |          |   |          |          |          |   |          |          |          |   |          |          |          |   |          |         |          |   |          |         |          |   |          |         |          |   |          |         |          |   |          |         |          |   |         |          |          |   |         |          |          |   |         |         |          |   |         |         |          |   |          |          |         |   |          |          |         |   |          |          |         |   |          |          |         |
| H                                                                                                                                                                                                                      | 2.56701                                                                                                                                                                                                                                                                                                                                                                                                                                                                                                                                                                                                                                                                                                                                                                                                                                                                                                                                                                                                                                                                                                                                                                                                                                                                                                                                                                                                                                                                                                                                                                                                                                                                                                                                                                                                                                                                                                                                                                                                                                                                                                                                                                                                                                                                                                                                                                                                                                                                                                                                                                                                                                                                                                                                                                                                                                                                                                                                                                                                                                                                                                                                                        | -2.07201 | 4.01668  |          |          |   |          |          |          |   |          |          |          |   |          |          |          |   |          |         |          |   |          |          |          |   |          |          |          |   |          |         |          |   |          |         |          |   |         |         |         |   |         |         |         |   |          |         |          |   |          |         |         |   |         |         |         |   |          |         |         |   |         |         |         |   |          |          |          |   |          |          |          |   |         |         |         |   |          |          |         |   |          |         |          |   |         |          |         |   |         |          |          |   |         |          |          |   |         |          |          |   |         |          |          |   |         |          |         |   |         |          |         |   |         |          |         |   |         |         |         |   |          |          |         |   |          |          |         |   |          |          |         |   |          |          |         |   |          |          |         |   |          |          |         |   |          |          |         |   |          |          |         |   |          |          |         |   |          |          |          |                                                                                                                                                                                                                       |                                                                                                                                                                                                                                                                                                                                                                                                                                                                                                                                                                                                                                                                                                                                                                                                                                                                                                                                                                                                                                                                                                                                                                                                                                                                                                                                                                                                                                                                                                                                                                                                                                                                                                                                                                                                                                                                                                                                                                                                                                                                                                                                                                                                                                                                                                                                                                                                                                                                                                                                                                                                                                                                                                                                                                                                                                                                                                                                         |          |          |          |          |         |         |          |          |         |          |                                                                                                                                                                                                                         |                                                                                                                                                                                                                                                                                                                                                                                                                                                                                                                                                                                                                                                                                                                                                                                                                                                                                                                                                                                                                                                                                                                                                                                                                                                                                                                                                                                                                                                                                                                                                                                                                                                                                                                                                                                                                                                                                                                                                                                                                                                                                                                                                                                                                                                                                                                                                                                                                                                                                                                                                                                                                                                                                                                                                                                                                                                                                                                                                                                                                                                                                                                                                             |   |          |          |          |   |          |          |          |   |          |          |          |   |          |          |          |   |          |          |          |   |          |          |          |   |          |          |          |   |          |         |         |   |          |         |         |   |         |         |         |   |          |         |         |   |          |         |         |   |         |          |          |   |          |          |          |   |         |         |         |   |         |          |          |   |          |          |          |   |          |         |          |   |          |          |          |   |          |          |         |   |          |          |         |   |          |          |          |   |         |          |         |   |         |          |         |   |         |          |          |   |          |          |         |   |          |          |          |   |          |          |          |   |          |          |          |   |          |          |          |   |          |         |          |   |          |         |          |   |          |         |          |   |          |         |          |   |          |         |          |   |         |          |          |   |         |          |          |   |         |         |          |   |         |         |          |   |          |          |         |   |          |          |         |   |          |          |         |   |          |          |         |
| H                                                                                                                                                                                                                      | 1.05612                                                                                                                                                                                                                                                                                                                                                                                                                                                                                                                                                                                                                                                                                                                                                                                                                                                                                                                                                                                                                                                                                                                                                                                                                                                                                                                                                                                                                                                                                                                                                                                                                                                                                                                                                                                                                                                                                                                                                                                                                                                                                                                                                                                                                                                                                                                                                                                                                                                                                                                                                                                                                                                                                                                                                                                                                                                                                                                                                                                                                                                                                                                                                        | -1.36281 | 4.60559  |          |          |   |          |          |          |   |          |          |          |   |          |          |          |   |          |         |          |   |          |          |          |   |          |          |          |   |          |         |          |   |          |         |          |   |         |         |         |   |         |         |         |   |          |         |          |   |          |         |         |   |         |         |         |   |          |         |         |   |         |         |         |   |          |          |          |   |          |          |          |   |         |         |         |   |          |          |         |   |          |         |          |   |         |          |         |   |         |          |          |   |         |          |          |   |         |          |          |   |         |          |          |   |         |          |         |   |         |          |         |   |         |          |         |   |         |         |         |   |          |          |         |   |          |          |         |   |          |          |         |   |          |          |         |   |          |          |         |   |          |          |         |   |          |          |         |   |          |          |         |   |          |          |         |   |          |          |          |                                                                                                                                                                                                                       |                                                                                                                                                                                                                                                                                                                                                                                                                                                                                                                                                                                                                                                                                                                                                                                                                                                                                                                                                                                                                                                                                                                                                                                                                                                                                                                                                                                                                                                                                                                                                                                                                                                                                                                                                                                                                                                                                                                                                                                                                                                                                                                                                                                                                                                                                                                                                                                                                                                                                                                                                                                                                                                                                                                                                                                                                                                                                                                                         |          |          |          |          |         |         |          |          |         |          |                                                                                                                                                                                                                         |                                                                                                                                                                                                                                                                                                                                                                                                                                                                                                                                                                                                                                                                                                                                                                                                                                                                                                                                                                                                                                                                                                                                                                                                                                                                                                                                                                                                                                                                                                                                                                                                                                                                                                                                                                                                                                                                                                                                                                                                                                                                                                                                                                                                                                                                                                                                                                                                                                                                                                                                                                                                                                                                                                                                                                                                                                                                                                                                                                                                                                                                                                                                                             |   |          |          |          |   |          |          |          |   |          |          |          |   |          |          |          |   |          |          |          |   |          |          |          |   |          |          |          |   |          |         |         |   |          |         |         |   |         |         |         |   |          |         |         |   |          |         |         |   |         |          |          |   |          |          |          |   |         |         |         |   |         |          |          |   |          |          |          |   |          |         |          |   |          |          |          |   |          |          |         |   |          |          |         |   |          |          |          |   |         |          |         |   |         |          |         |   |         |          |          |   |          |          |         |   |          |          |          |   |          |          |          |   |          |          |          |   |          |          |          |   |          |         |          |   |          |         |          |   |          |         |          |   |          |         |          |   |          |         |          |   |         |          |          |   |         |          |          |   |         |         |          |   |         |         |          |   |          |          |         |   |          |          |         |   |          |          |         |   |          |          |         |
| H                                                                                                                                                                                                                      | 2.57586                                                                                                                                                                                                                                                                                                                                                                                                                                                                                                                                                                                                                                                                                                                                                                                                                                                                                                                                                                                                                                                                                                                                                                                                                                                                                                                                                                                                                                                                                                                                                                                                                                                                                                                                                                                                                                                                                                                                                                                                                                                                                                                                                                                                                                                                                                                                                                                                                                                                                                                                                                                                                                                                                                                                                                                                                                                                                                                                                                                                                                                                                                                                                        | -0.47302 | 4.76547  |          |          |   |          |          |          |   |          |          |          |   |          |          |          |   |          |         |          |   |          |          |          |   |          |          |          |   |          |         |          |   |          |         |          |   |         |         |         |   |         |         |         |   |          |         |          |   |          |         |         |   |         |         |         |   |          |         |         |   |         |         |         |   |          |          |          |   |          |          |          |   |         |         |         |   |          |          |         |   |          |         |          |   |         |          |         |   |         |          |          |   |         |          |          |   |         |          |          |   |         |          |          |   |         |          |         |   |         |          |         |   |         |          |         |   |         |         |         |   |          |          |         |   |          |          |         |   |          |          |         |   |          |          |         |   |          |          |         |   |          |          |         |   |          |          |         |   |          |          |         |   |          |          |         |   |          |          |          |                                                                                                                                                                                                                       |                                                                                                                                                                                                                                                                                                                                                                                                                                                                                                                                                                                                                                                                                                                                                                                                                                                                                                                                                                                                                                                                                                                                                                                                                                                                                                                                                                                                                                                                                                                                                                                                                                                                                                                                                                                                                                                                                                                                                                                                                                                                                                                                                                                                                                                                                                                                                                                                                                                                                                                                                                                                                                                                                                                                                                                                                                                                                                                                         |          |          |          |          |         |         |          |          |         |          |                                                                                                                                                                                                                         |                                                                                                                                                                                                                                                                                                                                                                                                                                                                                                                                                                                                                                                                                                                                                                                                                                                                                                                                                                                                                                                                                                                                                                                                                                                                                                                                                                                                                                                                                                                                                                                                                                                                                                                                                                                                                                                                                                                                                                                                                                                                                                                                                                                                                                                                                                                                                                                                                                                                                                                                                                                                                                                                                                                                                                                                                                                                                                                                                                                                                                                                                                                                                             |   |          |          |          |   |          |          |          |   |          |          |          |   |          |          |          |   |          |          |          |   |          |          |          |   |          |          |          |   |          |         |         |   |          |         |         |   |         |         |         |   |          |         |         |   |          |         |         |   |         |          |          |   |          |          |          |   |         |         |         |   |         |          |          |   |          |          |          |   |          |         |          |   |          |          |          |   |          |          |         |   |          |          |         |   |          |          |          |   |         |          |         |   |         |          |         |   |         |          |          |   |          |          |         |   |          |          |          |   |          |          |          |   |          |          |          |   |          |          |          |   |          |         |          |   |          |         |          |   |          |         |          |   |          |         |          |   |          |         |          |   |         |          |          |   |         |          |          |   |         |         |          |   |         |         |          |   |          |          |         |   |          |          |         |   |          |          |         |   |          |          |         |
| C                                                                                                                                                                                                                      | 3.12919                                                                                                                                                                                                                                                                                                                                                                                                                                                                                                                                                                                                                                                                                                                                                                                                                                                                                                                                                                                                                                                                                                                                                                                                                                                                                                                                                                                                                                                                                                                                                                                                                                                                                                                                                                                                                                                                                                                                                                                                                                                                                                                                                                                                                                                                                                                                                                                                                                                                                                                                                                                                                                                                                                                                                                                                                                                                                                                                                                                                                                                                                                                                                        | -0.20854 | 2.06080  |          |          |   |          |          |          |   |          |          |          |   |          |          |          |   |          |         |          |   |          |          |          |   |          |          |          |   |          |         |          |   |          |         |          |   |         |         |         |   |         |         |         |   |          |         |          |   |          |         |         |   |         |         |         |   |          |         |         |   |         |         |         |   |          |          |          |   |          |          |          |   |         |         |         |   |          |          |         |   |          |         |          |   |         |          |         |   |         |          |          |   |         |          |          |   |         |          |          |   |         |          |          |   |         |          |         |   |         |          |         |   |         |          |         |   |         |         |         |   |          |          |         |   |          |          |         |   |          |          |         |   |          |          |         |   |          |          |         |   |          |          |         |   |          |          |         |   |          |          |         |   |          |          |         |   |          |          |          |                                                                                                                                                                                                                       |                                                                                                                                                                                                                                                                                                                                                                                                                                                                                                                                                                                                                                                                                                                                                                                                                                                                                                                                                                                                                                                                                                                                                                                                                                                                                                                                                                                                                                                                                                                                                                                                                                                                                                                                                                                                                                                                                                                                                                                                                                                                                                                                                                                                                                                                                                                                                                                                                                                                                                                                                                                                                                                                                                                                                                                                                                                                                                                                         |          |          |          |          |         |         |          |          |         |          |                                                                                                                                                                                                                         |                                                                                                                                                                                                                                                                                                                                                                                                                                                                                                                                                                                                                                                                                                                                                                                                                                                                                                                                                                                                                                                                                                                                                                                                                                                                                                                                                                                                                                                                                                                                                                                                                                                                                                                                                                                                                                                                                                                                                                                                                                                                                                                                                                                                                                                                                                                                                                                                                                                                                                                                                                                                                                                                                                                                                                                                                                                                                                                                                                                                                                                                                                                                                             |   |          |          |          |   |          |          |          |   |          |          |          |   |          |          |          |   |          |          |          |   |          |          |          |   |          |          |          |   |          |         |         |   |          |         |         |   |         |         |         |   |          |         |         |   |          |         |         |   |         |          |          |   |          |          |          |   |         |         |         |   |         |          |          |   |          |          |          |   |          |         |          |   |          |          |          |   |          |          |         |   |          |          |         |   |          |          |          |   |         |          |         |   |         |          |         |   |         |          |          |   |          |          |         |   |          |          |          |   |          |          |          |   |          |          |          |   |          |          |          |   |          |         |          |   |          |         |          |   |          |         |          |   |          |         |          |   |          |         |          |   |         |          |          |   |         |          |          |   |         |         |          |   |         |         |          |   |          |          |         |   |          |          |         |   |          |          |         |   |          |          |         |
| H                                                                                                                                                                                                                      | 3.72878                                                                                                                                                                                                                                                                                                                                                                                                                                                                                                                                                                                                                                                                                                                                                                                                                                                                                                                                                                                                                                                                                                                                                                                                                                                                                                                                                                                                                                                                                                                                                                                                                                                                                                                                                                                                                                                                                                                                                                                                                                                                                                                                                                                                                                                                                                                                                                                                                                                                                                                                                                                                                                                                                                                                                                                                                                                                                                                                                                                                                                                                                                                                                        | -1.11886 | 1.98289  |          |          |   |          |          |          |   |          |          |          |   |          |          |          |   |          |         |          |   |          |          |          |   |          |          |          |   |          |         |          |   |          |         |          |   |         |         |         |   |         |         |         |   |          |         |          |   |          |         |         |   |         |         |         |   |          |         |         |   |         |         |         |   |          |          |          |   |          |          |          |   |         |         |         |   |          |          |         |   |          |         |          |   |         |          |         |   |         |          |          |   |         |          |          |   |         |          |          |   |         |          |          |   |         |          |         |   |         |          |         |   |         |          |         |   |         |         |         |   |          |          |         |   |          |          |         |   |          |          |         |   |          |          |         |   |          |          |         |   |          |          |         |   |          |          |         |   |          |          |         |   |          |          |         |   |          |          |          |                                                                                                                                                                                                                       |                                                                                                                                                                                                                                                                                                                                                                                                                                                                                                                                                                                                                                                                                                                                                                                                                                                                                                                                                                                                                                                                                                                                                                                                                                                                                                                                                                                                                                                                                                                                                                                                                                                                                                                                                                                                                                                                                                                                                                                                                                                                                                                                                                                                                                                                                                                                                                                                                                                                                                                                                                                                                                                                                                                                                                                                                                                                                                                                         |          |          |          |          |         |         |          |          |         |          |                                                                                                                                                                                                                         |                                                                                                                                                                                                                                                                                                                                                                                                                                                                                                                                                                                                                                                                                                                                                                                                                                                                                                                                                                                                                                                                                                                                                                                                                                                                                                                                                                                                                                                                                                                                                                                                                                                                                                                                                                                                                                                                                                                                                                                                                                                                                                                                                                                                                                                                                                                                                                                                                                                                                                                                                                                                                                                                                                                                                                                                                                                                                                                                                                                                                                                                                                                                                             |   |          |          |          |   |          |          |          |   |          |          |          |   |          |          |          |   |          |          |          |   |          |          |          |   |          |          |          |   |          |         |         |   |          |         |         |   |         |         |         |   |          |         |         |   |          |         |         |   |         |          |          |   |          |          |          |   |         |         |         |   |         |          |          |   |          |          |          |   |          |         |          |   |          |          |          |   |          |          |         |   |          |          |         |   |          |          |          |   |         |          |         |   |         |          |         |   |         |          |          |   |          |          |         |   |          |          |          |   |          |          |          |   |          |          |          |   |          |          |          |   |          |         |          |   |          |         |          |   |          |         |          |   |          |         |          |   |          |         |          |   |         |          |          |   |         |          |          |   |         |         |          |   |         |         |          |   |          |          |         |   |          |          |         |   |          |          |         |   |          |          |         |
| H                                                                                                                                                                                                                      | 3.69318                                                                                                                                                                                                                                                                                                                                                                                                                                                                                                                                                                                                                                                                                                                                                                                                                                                                                                                                                                                                                                                                                                                                                                                                                                                                                                                                                                                                                                                                                                                                                                                                                                                                                                                                                                                                                                                                                                                                                                                                                                                                                                                                                                                                                                                                                                                                                                                                                                                                                                                                                                                                                                                                                                                                                                                                                                                                                                                                                                                                                                                                                                                                                        | 0.52474  | 2.64241  |          |          |   |          |          |          |   |          |          |          |   |          |          |          |   |          |         |          |   |          |          |          |   |          |          |          |   |          |         |          |   |          |         |          |   |         |         |         |   |         |         |         |   |          |         |          |   |          |         |         |   |         |         |         |   |          |         |         |   |         |         |         |   |          |          |          |   |          |          |          |   |         |         |         |   |          |          |         |   |          |         |          |   |         |          |         |   |         |          |          |   |         |          |          |   |         |          |          |   |         |          |          |   |         |          |         |   |         |          |         |   |         |          |         |   |         |         |         |   |          |          |         |   |          |          |         |   |          |          |         |   |          |          |         |   |          |          |         |   |          |          |         |   |          |          |         |   |          |          |         |   |          |          |         |   |          |          |          |                                                                                                                                                                                                                       |                                                                                                                                                                                                                                                                                                                                                                                                                                                                                                                                                                                                                                                                                                                                                                                                                                                                                                                                                                                                                                                                                                                                                                                                                                                                                                                                                                                                                                                                                                                                                                                                                                                                                                                                                                                                                                                                                                                                                                                                                                                                                                                                                                                                                                                                                                                                                                                                                                                                                                                                                                                                                                                                                                                                                                                                                                                                                                                                         |          |          |          |          |         |         |          |          |         |          |                                                                                                                                                                                                                         |                                                                                                                                                                                                                                                                                                                                                                                                                                                                                                                                                                                                                                                                                                                                                                                                                                                                                                                                                                                                                                                                                                                                                                                                                                                                                                                                                                                                                                                                                                                                                                                                                                                                                                                                                                                                                                                                                                                                                                                                                                                                                                                                                                                                                                                                                                                                                                                                                                                                                                                                                                                                                                                                                                                                                                                                                                                                                                                                                                                                                                                                                                                                                             |   |          |          |          |   |          |          |          |   |          |          |          |   |          |          |          |   |          |          |          |   |          |          |          |   |          |          |          |   |          |         |         |   |          |         |         |   |         |         |         |   |          |         |         |   |          |         |         |   |         |          |          |   |          |          |          |   |         |         |         |   |         |          |          |   |          |          |          |   |          |         |          |   |          |          |          |   |          |          |         |   |          |          |         |   |          |          |          |   |         |          |         |   |         |          |         |   |         |          |          |   |          |          |         |   |          |          |          |   |          |          |          |   |          |          |          |   |          |          |          |   |          |         |          |   |          |         |          |   |          |         |          |   |          |         |          |   |          |         |          |   |         |          |          |   |         |          |          |   |         |         |          |   |         |         |          |   |          |          |         |   |          |          |         |   |          |          |         |   |          |          |         |
| H                                                                                                                                                                                                                      | 2.97873                                                                                                                                                                                                                                                                                                                                                                                                                                                                                                                                                                                                                                                                                                                                                                                                                                                                                                                                                                                                                                                                                                                                                                                                                                                                                                                                                                                                                                                                                                                                                                                                                                                                                                                                                                                                                                                                                                                                                                                                                                                                                                                                                                                                                                                                                                                                                                                                                                                                                                                                                                                                                                                                                                                                                                                                                                                                                                                                                                                                                                                                                                                                                        | 0.19599  | 1.05819  |          |          |   |          |          |          |   |          |          |          |   |          |          |          |   |          |         |          |   |          |          |          |   |          |          |          |   |          |         |          |   |          |         |          |   |         |         |         |   |         |         |         |   |          |         |          |   |          |         |         |   |         |         |         |   |          |         |         |   |         |         |         |   |          |          |          |   |          |          |          |   |         |         |         |   |          |          |         |   |          |         |          |   |         |          |         |   |         |          |          |   |         |          |          |   |         |          |          |   |         |          |          |   |         |          |         |   |         |          |         |   |         |          |         |   |         |         |         |   |          |          |         |   |          |          |         |   |          |          |         |   |          |          |         |   |          |          |         |   |          |          |         |   |          |          |         |   |          |          |         |   |          |          |         |   |          |          |          |                                                                                                                                                                                                                       |                                                                                                                                                                                                                                                                                                                                                                                                                                                                                                                                                                                                                                                                                                                                                                                                                                                                                                                                                                                                                                                                                                                                                                                                                                                                                                                                                                                                                                                                                                                                                                                                                                                                                                                                                                                                                                                                                                                                                                                                                                                                                                                                                                                                                                                                                                                                                                                                                                                                                                                                                                                                                                                                                                                                                                                                                                                                                                                                         |          |          |          |          |         |         |          |          |         |          |                                                                                                                                                                                                                         |                                                                                                                                                                                                                                                                                                                                                                                                                                                                                                                                                                                                                                                                                                                                                                                                                                                                                                                                                                                                                                                                                                                                                                                                                                                                                                                                                                                                                                                                                                                                                                                                                                                                                                                                                                                                                                                                                                                                                                                                                                                                                                                                                                                                                                                                                                                                                                                                                                                                                                                                                                                                                                                                                                                                                                                                                                                                                                                                                                                                                                                                                                                                                             |   |          |          |          |   |          |          |          |   |          |          |          |   |          |          |          |   |          |          |          |   |          |          |          |   |          |          |          |   |          |         |         |   |          |         |         |   |         |         |         |   |          |         |         |   |          |         |         |   |         |          |          |   |          |          |          |   |         |         |         |   |         |          |          |   |          |          |          |   |          |         |          |   |          |          |          |   |          |          |         |   |          |          |         |   |          |          |          |   |         |          |         |   |         |          |         |   |         |          |          |   |          |          |         |   |          |          |          |   |          |          |          |   |          |          |          |   |          |          |          |   |          |         |          |   |          |         |          |   |          |         |          |   |          |         |          |   |          |         |          |   |         |          |          |   |         |          |          |   |         |         |          |   |         |         |          |   |          |          |         |   |          |          |         |   |          |          |         |   |          |          |         |
| H                                                                                                                                                                                                                      | -0.85502                                                                                                                                                                                                                                                                                                                                                                                                                                                                                                                                                                                                                                                                                                                                                                                                                                                                                                                                                                                                                                                                                                                                                                                                                                                                                                                                                                                                                                                                                                                                                                                                                                                                                                                                                                                                                                                                                                                                                                                                                                                                                                                                                                                                                                                                                                                                                                                                                                                                                                                                                                                                                                                                                                                                                                                                                                                                                                                                                                                                                                                                                                                                                       | -0.96642 | 3.48250  |          |          |   |          |          |          |   |          |          |          |   |          |          |          |   |          |         |          |   |          |          |          |   |          |          |          |   |          |         |          |   |          |         |          |   |         |         |         |   |         |         |         |   |          |         |          |   |          |         |         |   |         |         |         |   |          |         |         |   |         |         |         |   |          |          |          |   |          |          |          |   |         |         |         |   |          |          |         |   |          |         |          |   |         |          |         |   |         |          |          |   |         |          |          |   |         |          |          |   |         |          |          |   |         |          |         |   |         |          |         |   |         |          |         |   |         |         |         |   |          |          |         |   |          |          |         |   |          |          |         |   |          |          |         |   |          |          |         |   |          |          |         |   |          |          |         |   |          |          |         |   |          |          |         |   |          |          |          |                                                                                                                                                                                                                       |                                                                                                                                                                                                                                                                                                                                                                                                                                                                                                                                                                                                                                                                                                                                                                                                                                                                                                                                                                                                                                                                                                                                                                                                                                                                                                                                                                                                                                                                                                                                                                                                                                                                                                                                                                                                                                                                                                                                                                                                                                                                                                                                                                                                                                                                                                                                                                                                                                                                                                                                                                                                                                                                                                                                                                                                                                                                                                                                         |          |          |          |          |         |         |          |          |         |          |                                                                                                                                                                                                                         |                                                                                                                                                                                                                                                                                                                                                                                                                                                                                                                                                                                                                                                                                                                                                                                                                                                                                                                                                                                                                                                                                                                                                                                                                                                                                                                                                                                                                                                                                                                                                                                                                                                                                                                                                                                                                                                                                                                                                                                                                                                                                                                                                                                                                                                                                                                                                                                                                                                                                                                                                                                                                                                                                                                                                                                                                                                                                                                                                                                                                                                                                                                                                             |   |          |          |          |   |          |          |          |   |          |          |          |   |          |          |          |   |          |          |          |   |          |          |          |   |          |          |          |   |          |         |         |   |          |         |         |   |         |         |         |   |          |         |         |   |          |         |         |   |         |          |          |   |          |          |          |   |         |         |         |   |         |          |          |   |          |          |          |   |          |         |          |   |          |          |          |   |          |          |         |   |          |          |         |   |          |          |          |   |         |          |         |   |         |          |         |   |         |          |          |   |          |          |         |   |          |          |          |   |          |          |          |   |          |          |          |   |          |          |          |   |          |         |          |   |          |         |          |   |          |         |          |   |          |         |          |   |          |         |          |   |         |          |          |   |         |          |          |   |         |         |          |   |         |         |          |   |          |          |         |   |          |          |         |   |          |          |         |   |          |          |         |
| C                                                                                                                                                                                                                      | -0.75631                                                                                                                                                                                                                                                                                                                                                                                                                                                                                                                                                                                                                                                                                                                                                                                                                                                                                                                                                                                                                                                                                                                                                                                                                                                                                                                                                                                                                                                                                                                                                                                                                                                                                                                                                                                                                                                                                                                                                                                                                                                                                                                                                                                                                                                                                                                                                                                                                                                                                                                                                                                                                                                                                                                                                                                                                                                                                                                                                                                                                                                                                                                                                       | -3.07749 | 3.18977  |          |          |   |          |          |          |   |          |          |          |   |          |          |          |   |          |         |          |   |          |          |          |   |          |          |          |   |          |         |          |   |          |         |          |   |         |         |         |   |         |         |         |   |          |         |          |   |          |         |         |   |         |         |         |   |          |         |         |   |         |         |         |   |          |          |          |   |          |          |          |   |         |         |         |   |          |          |         |   |          |         |          |   |         |          |         |   |         |          |          |   |         |          |          |   |         |          |          |   |         |          |          |   |         |          |         |   |         |          |         |   |         |          |         |   |         |         |         |   |          |          |         |   |          |          |         |   |          |          |         |   |          |          |         |   |          |          |         |   |          |          |         |   |          |          |         |   |          |          |         |   |          |          |         |   |          |          |          |                                                                                                                                                                                                                       |                                                                                                                                                                                                                                                                                                                                                                                                                                                                                                                                                                                                                                                                                                                                                                                                                                                                                                                                                                                                                                                                                                                                                                                                                                                                                                                                                                                                                                                                                                                                                                                                                                                                                                                                                                                                                                                                                                                                                                                                                                                                                                                                                                                                                                                                                                                                                                                                                                                                                                                                                                                                                                                                                                                                                                                                                                                                                                                                         |          |          |          |          |         |         |          |          |         |          |                                                                                                                                                                                                                         |                                                                                                                                                                                                                                                                                                                                                                                                                                                                                                                                                                                                                                                                                                                                                                                                                                                                                                                                                                                                                                                                                                                                                                                                                                                                                                                                                                                                                                                                                                                                                                                                                                                                                                                                                                                                                                                                                                                                                                                                                                                                                                                                                                                                                                                                                                                                                                                                                                                                                                                                                                                                                                                                                                                                                                                                                                                                                                                                                                                                                                                                                                                                                             |   |          |          |          |   |          |          |          |   |          |          |          |   |          |          |          |   |          |          |          |   |          |          |          |   |          |          |          |   |          |         |         |   |          |         |         |   |         |         |         |   |          |         |         |   |          |         |         |   |         |          |          |   |          |          |          |   |         |         |         |   |         |          |          |   |          |          |          |   |          |         |          |   |          |          |          |   |          |          |         |   |          |          |         |   |          |          |          |   |         |          |         |   |         |          |         |   |         |          |          |   |          |          |         |   |          |          |          |   |          |          |          |   |          |          |          |   |          |          |          |   |          |         |          |   |          |         |          |   |          |         |          |   |          |         |          |   |          |         |          |   |         |          |          |   |         |          |          |   |         |         |          |   |         |         |          |   |          |          |         |   |          |          |         |   |          |          |         |   |          |          |         |
| H                                                                                                                                                                                                                      | 0.29893                                                                                                                                                                                                                                                                                                                                                                                                                                                                                                                                                                                                                                                                                                                                                                                                                                                                                                                                                                                                                                                                                                                                                                                                                                                                                                                                                                                                                                                                                                                                                                                                                                                                                                                                                                                                                                                                                                                                                                                                                                                                                                                                                                                                                                                                                                                                                                                                                                                                                                                                                                                                                                                                                                                                                                                                                                                                                                                                                                                                                                                                                                                                                        | -3.10896 | 2.91588  |          |          |   |          |          |          |   |          |          |          |   |          |          |          |   |          |         |          |   |          |          |          |   |          |          |          |   |          |         |          |   |          |         |          |   |         |         |         |   |         |         |         |   |          |         |          |   |          |         |         |   |         |         |         |   |          |         |         |   |         |         |         |   |          |          |          |   |          |          |          |   |         |         |         |   |          |          |         |   |          |         |          |   |         |          |         |   |         |          |          |   |         |          |          |   |         |          |          |   |         |          |          |   |         |          |         |   |         |          |         |   |         |          |         |   |         |         |         |   |          |          |         |   |          |          |         |   |          |          |         |   |          |          |         |   |          |          |         |   |          |          |         |   |          |          |         |   |          |          |         |   |          |          |         |   |          |          |          |                                                                                                                                                                                                                       |                                                                                                                                                                                                                                                                                                                                                                                                                                                                                                                                                                                                                                                                                                                                                                                                                                                                                                                                                                                                                                                                                                                                                                                                                                                                                                                                                                                                                                                                                                                                                                                                                                                                                                                                                                                                                                                                                                                                                                                                                                                                                                                                                                                                                                                                                                                                                                                                                                                                                                                                                                                                                                                                                                                                                                                                                                                                                                                                         |          |          |          |          |         |         |          |          |         |          |                                                                                                                                                                                                                         |                                                                                                                                                                                                                                                                                                                                                                                                                                                                                                                                                                                                                                                                                                                                                                                                                                                                                                                                                                                                                                                                                                                                                                                                                                                                                                                                                                                                                                                                                                                                                                                                                                                                                                                                                                                                                                                                                                                                                                                                                                                                                                                                                                                                                                                                                                                                                                                                                                                                                                                                                                                                                                                                                                                                                                                                                                                                                                                                                                                                                                                                                                                                                             |   |          |          |          |   |          |          |          |   |          |          |          |   |          |          |          |   |          |          |          |   |          |          |          |   |          |          |          |   |          |         |         |   |          |         |         |   |         |         |         |   |          |         |         |   |          |         |         |   |         |          |          |   |          |          |          |   |         |         |         |   |         |          |          |   |          |          |          |   |          |         |          |   |          |          |          |   |          |          |         |   |          |          |         |   |          |          |          |   |         |          |         |   |         |          |         |   |         |          |          |   |          |          |         |   |          |          |          |   |          |          |          |   |          |          |          |   |          |          |          |   |          |         |          |   |          |         |          |   |          |         |          |   |          |         |          |   |          |         |          |   |         |          |          |   |         |          |          |   |         |         |          |   |         |         |          |   |          |          |         |   |          |          |         |   |          |          |         |   |          |          |         |
| H                                                                                                                                                                                                                      | -1.27359                                                                                                                                                                                                                                                                                                                                                                                                                                                                                                                                                                                                                                                                                                                                                                                                                                                                                                                                                                                                                                                                                                                                                                                                                                                                                                                                                                                                                                                                                                                                                                                                                                                                                                                                                                                                                                                                                                                                                                                                                                                                                                                                                                                                                                                                                                                                                                                                                                                                                                                                                                                                                                                                                                                                                                                                                                                                                                                                                                                                                                                                                                                                                       | -3.87203 | 2.64796  |          |          |   |          |          |          |   |          |          |          |   |          |          |          |   |          |         |          |   |          |          |          |   |          |          |          |   |          |         |          |   |          |         |          |   |         |         |         |   |         |         |         |   |          |         |          |   |          |         |         |   |         |         |         |   |          |         |         |   |         |         |         |   |          |          |          |   |          |          |          |   |         |         |         |   |          |          |         |   |          |         |          |   |         |          |         |   |         |          |          |   |         |          |          |   |         |          |          |   |         |          |          |   |         |          |         |   |         |          |         |   |         |          |         |   |         |         |         |   |          |          |         |   |          |          |         |   |          |          |         |   |          |          |         |   |          |          |         |   |          |          |         |   |          |          |         |   |          |          |         |   |          |          |         |   |          |          |          |                                                                                                                                                                                                                       |                                                                                                                                                                                                                                                                                                                                                                                                                                                                                                                                                                                                                                                                                                                                                                                                                                                                                                                                                                                                                                                                                                                                                                                                                                                                                                                                                                                                                                                                                                                                                                                                                                                                                                                                                                                                                                                                                                                                                                                                                                                                                                                                                                                                                                                                                                                                                                                                                                                                                                                                                                                                                                                                                                                                                                                                                                                                                                                                         |          |          |          |          |         |         |          |          |         |          |                                                                                                                                                                                                                         |                                                                                                                                                                                                                                                                                                                                                                                                                                                                                                                                                                                                                                                                                                                                                                                                                                                                                                                                                                                                                                                                                                                                                                                                                                                                                                                                                                                                                                                                                                                                                                                                                                                                                                                                                                                                                                                                                                                                                                                                                                                                                                                                                                                                                                                                                                                                                                                                                                                                                                                                                                                                                                                                                                                                                                                                                                                                                                                                                                                                                                                                                                                                                             |   |          |          |          |   |          |          |          |   |          |          |          |   |          |          |          |   |          |          |          |   |          |          |          |   |          |          |          |   |          |         |         |   |          |         |         |   |         |         |         |   |          |         |         |   |          |         |         |   |         |          |          |   |          |          |          |   |         |         |         |   |         |          |          |   |          |          |          |   |          |         |          |   |          |          |          |   |          |          |         |   |          |          |         |   |          |          |          |   |         |          |         |   |         |          |         |   |         |          |          |   |          |          |         |   |          |          |          |   |          |          |          |   |          |          |          |   |          |          |          |   |          |         |          |   |          |         |          |   |          |         |          |   |          |         |          |   |          |         |          |   |         |          |          |   |         |          |          |   |         |         |          |   |         |         |          |   |          |          |         |   |          |          |         |   |          |          |         |   |          |          |         |
| H                                                                                                                                                                                                                      | -0.84069                                                                                                                                                                                                                                                                                                                                                                                                                                                                                                                                                                                                                                                                                                                                                                                                                                                                                                                                                                                                                                                                                                                                                                                                                                                                                                                                                                                                                                                                                                                                                                                                                                                                                                                                                                                                                                                                                                                                                                                                                                                                                                                                                                                                                                                                                                                                                                                                                                                                                                                                                                                                                                                                                                                                                                                                                                                                                                                                                                                                                                                                                                                                                       | -3.29036 | 4.25786  |          |          |   |          |          |          |   |          |          |          |   |          |          |          |   |          |         |          |   |          |          |          |   |          |          |          |   |          |         |          |   |          |         |          |   |         |         |         |   |         |         |         |   |          |         |          |   |          |         |         |   |         |         |         |   |          |         |         |   |         |         |         |   |          |          |          |   |          |          |          |   |         |         |         |   |          |          |         |   |          |         |          |   |         |          |         |   |         |          |          |   |         |          |          |   |         |          |          |   |         |          |          |   |         |          |         |   |         |          |         |   |         |          |         |   |         |         |         |   |          |          |         |   |          |          |         |   |          |          |         |   |          |          |         |   |          |          |         |   |          |          |         |   |          |          |         |   |          |          |         |   |          |          |         |   |          |          |          |                                                                                                                                                                                                                       |                                                                                                                                                                                                                                                                                                                                                                                                                                                                                                                                                                                                                                                                                                                                                                                                                                                                                                                                                                                                                                                                                                                                                                                                                                                                                                                                                                                                                                                                                                                                                                                                                                                                                                                                                                                                                                                                                                                                                                                                                                                                                                                                                                                                                                                                                                                                                                                                                                                                                                                                                                                                                                                                                                                                                                                                                                                                                                                                         |          |          |          |          |         |         |          |          |         |          |                                                                                                                                                                                                                         |                                                                                                                                                                                                                                                                                                                                                                                                                                                                                                                                                                                                                                                                                                                                                                                                                                                                                                                                                                                                                                                                                                                                                                                                                                                                                                                                                                                                                                                                                                                                                                                                                                                                                                                                                                                                                                                                                                                                                                                                                                                                                                                                                                                                                                                                                                                                                                                                                                                                                                                                                                                                                                                                                                                                                                                                                                                                                                                                                                                                                                                                                                                                                             |   |          |          |          |   |          |          |          |   |          |          |          |   |          |          |          |   |          |          |          |   |          |          |          |   |          |          |          |   |          |         |         |   |          |         |         |   |         |         |         |   |          |         |         |   |          |         |         |   |         |          |          |   |          |          |          |   |         |         |         |   |         |          |          |   |          |          |          |   |          |         |          |   |          |          |          |   |          |          |         |   |          |          |         |   |          |          |          |   |         |          |         |   |         |          |         |   |         |          |          |   |          |          |         |   |          |          |          |   |          |          |          |   |          |          |          |   |          |          |          |   |          |         |          |   |          |         |          |   |          |         |          |   |          |         |          |   |          |         |          |   |         |          |          |   |         |          |          |   |         |         |          |   |         |         |          |   |          |          |         |   |          |          |         |   |          |          |         |   |          |          |         |
| C                                                                                                                                                                                                                      | -2.85277                                                                                                                                                                                                                                                                                                                                                                                                                                                                                                                                                                                                                                                                                                                                                                                                                                                                                                                                                                                                                                                                                                                                                                                                                                                                                                                                                                                                                                                                                                                                                                                                                                                                                                                                                                                                                                                                                                                                                                                                                                                                                                                                                                                                                                                                                                                                                                                                                                                                                                                                                                                                                                                                                                                                                                                                                                                                                                                                                                                                                                                                                                                                                       | -1.67943 | 3.27369  |          |          |   |          |          |          |   |          |          |          |   |          |          |          |   |          |         |          |   |          |          |          |   |          |          |          |   |          |         |          |   |          |         |          |   |         |         |         |   |         |         |         |   |          |         |          |   |          |         |         |   |         |         |         |   |          |         |         |   |         |         |         |   |          |          |          |   |          |          |          |   |         |         |         |   |          |          |         |   |          |         |          |   |         |          |         |   |         |          |          |   |         |          |          |   |         |          |          |   |         |          |          |   |         |          |         |   |         |          |         |   |         |          |         |   |         |         |         |   |          |          |         |   |          |          |         |   |          |          |         |   |          |          |         |   |          |          |         |   |          |          |         |   |          |          |         |   |          |          |         |   |          |          |         |   |          |          |          |                                                                                                                                                                                                                       |                                                                                                                                                                                                                                                                                                                                                                                                                                                                                                                                                                                                                                                                                                                                                                                                                                                                                                                                                                                                                                                                                                                                                                                                                                                                                                                                                                                                                                                                                                                                                                                                                                                                                                                                                                                                                                                                                                                                                                                                                                                                                                                                                                                                                                                                                                                                                                                                                                                                                                                                                                                                                                                                                                                                                                                                                                                                                                                                         |          |          |          |          |         |         |          |          |         |          |                                                                                                                                                                                                                         |                                                                                                                                                                                                                                                                                                                                                                                                                                                                                                                                                                                                                                                                                                                                                                                                                                                                                                                                                                                                                                                                                                                                                                                                                                                                                                                                                                                                                                                                                                                                                                                                                                                                                                                                                                                                                                                                                                                                                                                                                                                                                                                                                                                                                                                                                                                                                                                                                                                                                                                                                                                                                                                                                                                                                                                                                                                                                                                                                                                                                                                                                                                                                             |   |          |          |          |   |          |          |          |   |          |          |          |   |          |          |          |   |          |          |          |   |          |          |          |   |          |          |          |   |          |         |         |   |          |         |         |   |         |         |         |   |          |         |         |   |          |         |         |   |         |          |          |   |          |          |          |   |         |         |         |   |         |          |          |   |          |          |          |   |          |         |          |   |          |          |          |   |          |          |         |   |          |          |         |   |          |          |          |   |         |          |         |   |         |          |         |   |         |          |          |   |          |          |         |   |          |          |          |   |          |          |          |   |          |          |          |   |          |          |          |   |          |         |          |   |          |         |          |   |          |         |          |   |          |         |          |   |          |         |          |   |         |          |          |   |         |          |          |   |         |         |          |   |         |         |          |   |          |          |         |   |          |          |         |   |          |          |         |   |          |          |         |
| H                                                                                                                                                                                                                      | -3.41909                                                                                                                                                                                                                                                                                                                                                                                                                                                                                                                                                                                                                                                                                                                                                                                                                                                                                                                                                                                                                                                                                                                                                                                                                                                                                                                                                                                                                                                                                                                                                                                                                                                                                                                                                                                                                                                                                                                                                                                                                                                                                                                                                                                                                                                                                                                                                                                                                                                                                                                                                                                                                                                                                                                                                                                                                                                                                                                                                                                                                                                                                                                                                       | -2.40756 | 2.68795  |          |          |   |          |          |          |   |          |          |          |   |          |          |          |   |          |         |          |   |          |          |          |   |          |          |          |   |          |         |          |   |          |         |          |   |         |         |         |   |         |         |         |   |          |         |          |   |          |         |         |   |         |         |         |   |          |         |         |   |         |         |         |   |          |          |          |   |          |          |          |   |         |         |         |   |          |          |         |   |          |         |          |   |         |          |         |   |         |          |          |   |         |          |          |   |         |          |          |   |         |          |          |   |         |          |         |   |         |          |         |   |         |          |         |   |         |         |         |   |          |          |         |   |          |          |         |   |          |          |         |   |          |          |         |   |          |          |         |   |          |          |         |   |          |          |         |   |          |          |         |   |          |          |         |   |          |          |          |                                                                                                                                                                                                                       |                                                                                                                                                                                                                                                                                                                                                                                                                                                                                                                                                                                                                                                                                                                                                                                                                                                                                                                                                                                                                                                                                                                                                                                                                                                                                                                                                                                                                                                                                                                                                                                                                                                                                                                                                                                                                                                                                                                                                                                                                                                                                                                                                                                                                                                                                                                                                                                                                                                                                                                                                                                                                                                                                                                                                                                                                                                                                                                                         |          |          |          |          |         |         |          |          |         |          |                                                                                                                                                                                                                         |                                                                                                                                                                                                                                                                                                                                                                                                                                                                                                                                                                                                                                                                                                                                                                                                                                                                                                                                                                                                                                                                                                                                                                                                                                                                                                                                                                                                                                                                                                                                                                                                                                                                                                                                                                                                                                                                                                                                                                                                                                                                                                                                                                                                                                                                                                                                                                                                                                                                                                                                                                                                                                                                                                                                                                                                                                                                                                                                                                                                                                                                                                                                                             |   |          |          |          |   |          |          |          |   |          |          |          |   |          |          |          |   |          |          |          |   |          |          |          |   |          |          |          |   |          |         |         |   |          |         |         |   |         |         |         |   |          |         |         |   |          |         |         |   |         |          |          |   |          |          |          |   |         |         |         |   |         |          |          |   |          |          |          |   |          |         |          |   |          |          |          |   |          |          |         |   |          |          |         |   |          |          |          |   |         |          |         |   |         |          |         |   |         |          |          |   |          |          |         |   |          |          |          |   |          |          |          |   |          |          |          |   |          |          |          |   |          |         |          |   |          |         |          |   |          |         |          |   |          |         |          |   |          |         |          |   |         |          |          |   |         |          |          |   |         |         |          |   |         |         |          |   |          |          |         |   |          |          |         |   |          |          |         |   |          |          |         |
| H                                                                                                                                                                                                                      | -3.28389                                                                                                                                                                                                                                                                                                                                                                                                                                                                                                                                                                                                                                                                                                                                                                                                                                                                                                                                                                                                                                                                                                                                                                                                                                                                                                                                                                                                                                                                                                                                                                                                                                                                                                                                                                                                                                                                                                                                                                                                                                                                                                                                                                                                                                                                                                                                                                                                                                                                                                                                                                                                                                                                                                                                                                                                                                                                                                                                                                                                                                                                                                                                                       | -0.69223 | 3.09730  |          |          |   |          |          |          |   |          |          |          |   |          |          |          |   |          |         |          |   |          |          |          |   |          |          |          |   |          |         |          |   |          |         |          |   |         |         |         |   |         |         |         |   |          |         |          |   |          |         |         |   |         |         |         |   |          |         |         |   |         |         |         |   |          |          |          |   |          |          |          |   |         |         |         |   |          |          |         |   |          |         |          |   |         |          |         |   |         |          |          |   |         |          |          |   |         |          |          |   |         |          |          |   |         |          |         |   |         |          |         |   |         |          |         |   |         |         |         |   |          |          |         |   |          |          |         |   |          |          |         |   |          |          |         |   |          |          |         |   |          |          |         |   |          |          |         |   |          |          |         |   |          |          |         |   |          |          |          |                                                                                                                                                                                                                       |                                                                                                                                                                                                                                                                                                                                                                                                                                                                                                                                                                                                                                                                                                                                                                                                                                                                                                                                                                                                                                                                                                                                                                                                                                                                                                                                                                                                                                                                                                                                                                                                                                                                                                                                                                                                                                                                                                                                                                                                                                                                                                                                                                                                                                                                                                                                                                                                                                                                                                                                                                                                                                                                                                                                                                                                                                                                                                                                         |          |          |          |          |         |         |          |          |         |          |                                                                                                                                                                                                                         |                                                                                                                                                                                                                                                                                                                                                                                                                                                                                                                                                                                                                                                                                                                                                                                                                                                                                                                                                                                                                                                                                                                                                                                                                                                                                                                                                                                                                                                                                                                                                                                                                                                                                                                                                                                                                                                                                                                                                                                                                                                                                                                                                                                                                                                                                                                                                                                                                                                                                                                                                                                                                                                                                                                                                                                                                                                                                                                                                                                                                                                                                                                                                             |   |          |          |          |   |          |          |          |   |          |          |          |   |          |          |          |   |          |          |          |   |          |          |          |   |          |          |          |   |          |         |         |   |          |         |         |   |         |         |         |   |          |         |         |   |          |         |         |   |         |          |          |   |          |          |          |   |         |         |         |   |         |          |          |   |          |          |          |   |          |         |          |   |          |          |          |   |          |          |         |   |          |          |         |   |          |          |          |   |         |          |         |   |         |          |         |   |         |          |          |   |          |          |         |   |          |          |          |   |          |          |          |   |          |          |          |   |          |          |          |   |          |         |          |   |          |         |          |   |          |         |          |   |          |         |          |   |          |         |          |   |         |          |          |   |         |          |          |   |         |         |          |   |         |         |          |   |          |          |         |   |          |          |         |   |          |          |         |   |          |          |         |
| H                                                                                                                                                                                                                      | -2.96851                                                                                                                                                                                                                                                                                                                                                                                                                                                                                                                                                                                                                                                                                                                                                                                                                                                                                                                                                                                                                                                                                                                                                                                                                                                                                                                                                                                                                                                                                                                                                                                                                                                                                                                                                                                                                                                                                                                                                                                                                                                                                                                                                                                                                                                                                                                                                                                                                                                                                                                                                                                                                                                                                                                                                                                                                                                                                                                                                                                                                                                                                                                                                       | -1.92609 | 4.33202  |          |          |   |          |          |          |   |          |          |          |   |          |          |          |   |          |         |          |   |          |          |          |   |          |          |          |   |          |         |          |   |          |         |          |   |         |         |         |   |         |         |         |   |          |         |          |   |          |         |         |   |         |         |         |   |          |         |         |   |         |         |         |   |          |          |          |   |          |          |          |   |         |         |         |   |          |          |         |   |          |         |          |   |         |          |         |   |         |          |          |   |         |          |          |   |         |          |          |   |         |          |          |   |         |          |         |   |         |          |         |   |         |          |         |   |         |         |         |   |          |          |         |   |          |          |         |   |          |          |         |   |          |          |         |   |          |          |         |   |          |          |         |   |          |          |         |   |          |          |         |   |          |          |         |   |          |          |          |                                                                                                                                                                                                                       |                                                                                                                                                                                                                                                                                                                                                                                                                                                                                                                                                                                                                                                                                                                                                                                                                                                                                                                                                                                                                                                                                                                                                                                                                                                                                                                                                                                                                                                                                                                                                                                                                                                                                                                                                                                                                                                                                                                                                                                                                                                                                                                                                                                                                                                                                                                                                                                                                                                                                                                                                                                                                                                                                                                                                                                                                                                                                                                                         |          |          |          |          |         |         |          |          |         |          |                                                                                                                                                                                                                         |                                                                                                                                                                                                                                                                                                                                                                                                                                                                                                                                                                                                                                                                                                                                                                                                                                                                                                                                                                                                                                                                                                                                                                                                                                                                                                                                                                                                                                                                                                                                                                                                                                                                                                                                                                                                                                                                                                                                                                                                                                                                                                                                                                                                                                                                                                                                                                                                                                                                                                                                                                                                                                                                                                                                                                                                                                                                                                                                                                                                                                                                                                                                                             |   |          |          |          |   |          |          |          |   |          |          |          |   |          |          |          |   |          |          |          |   |          |          |          |   |          |          |          |   |          |         |         |   |          |         |         |   |         |         |         |   |          |         |         |   |          |         |         |   |         |          |          |   |          |          |          |   |         |         |         |   |         |          |          |   |          |          |          |   |          |         |          |   |          |          |          |   |          |          |         |   |          |          |         |   |          |          |          |   |         |          |         |   |         |          |         |   |         |          |          |   |          |          |         |   |          |          |          |   |          |          |          |   |          |          |          |   |          |          |          |   |          |         |          |   |          |         |          |   |          |         |          |   |          |         |          |   |          |         |          |   |         |          |          |   |         |          |          |   |         |         |          |   |         |         |          |   |          |          |         |   |          |          |         |   |          |          |         |   |          |          |         |
| C                                                                                                                                                                                                                      | 0.09409                                                                                                                                                                                                                                                                                                                                                                                                                                                                                                                                                                                                                                                                                                                                                                                                                                                                                                                                                                                                                                                                                                                                                                                                                                                                                                                                                                                                                                                                                                                                                                                                                                                                                                                                                                                                                                                                                                                                                                                                                                                                                                                                                                                                                                                                                                                                                                                                                                                                                                                                                                                                                                                                                                                                                                                                                                                                                                                                                                                                                                                                                                                                                        | -2.60939 | -2.52548 |          |          |   |          |          |          |   |          |          |          |   |          |          |          |   |          |         |          |   |          |          |          |   |          |          |          |   |          |         |          |   |          |         |          |   |         |         |         |   |         |         |         |   |          |         |          |   |          |         |         |   |         |         |         |   |          |         |         |   |         |         |         |   |          |          |          |   |          |          |          |   |         |         |         |   |          |          |         |   |          |         |          |   |         |          |         |   |         |          |          |   |         |          |          |   |         |          |          |   |         |          |          |   |         |          |         |   |         |          |         |   |         |          |         |   |         |         |         |   |          |          |         |   |          |          |         |   |          |          |         |   |          |          |         |   |          |          |         |   |          |          |         |   |          |          |         |   |          |          |         |   |          |          |         |   |          |          |          |                                                                                                                                                                                                                       |                                                                                                                                                                                                                                                                                                                                                                                                                                                                                                                                                                                                                                                                                                                                                                                                                                                                                                                                                                                                                                                                                                                                                                                                                                                                                                                                                                                                                                                                                                                                                                                                                                                                                                                                                                                                                                                                                                                                                                                                                                                                                                                                                                                                                                                                                                                                                                                                                                                                                                                                                                                                                                                                                                                                                                                                                                                                                                                                         |          |          |          |          |         |         |          |          |         |          |                                                                                                                                                                                                                         |                                                                                                                                                                                                                                                                                                                                                                                                                                                                                                                                                                                                                                                                                                                                                                                                                                                                                                                                                                                                                                                                                                                                                                                                                                                                                                                                                                                                                                                                                                                                                                                                                                                                                                                                                                                                                                                                                                                                                                                                                                                                                                                                                                                                                                                                                                                                                                                                                                                                                                                                                                                                                                                                                                                                                                                                                                                                                                                                                                                                                                                                                                                                                             |   |          |          |          |   |          |          |          |   |          |          |          |   |          |          |          |   |          |          |          |   |          |          |          |   |          |          |          |   |          |         |         |   |          |         |         |   |         |         |         |   |          |         |         |   |          |         |         |   |         |          |          |   |          |          |          |   |         |         |         |   |         |          |          |   |          |          |          |   |          |         |          |   |          |          |          |   |          |          |         |   |          |          |         |   |          |          |          |   |         |          |         |   |         |          |         |   |         |          |          |   |          |          |         |   |          |          |          |   |          |          |          |   |          |          |          |   |          |          |          |   |          |         |          |   |          |         |          |   |          |         |          |   |          |         |          |   |          |         |          |   |         |          |          |   |         |          |          |   |         |         |          |   |         |         |          |   |          |          |         |   |          |          |         |   |          |          |         |   |          |          |         |
| C                                                                                                                                                                                                                      | 0.10921                                                                                                                                                                                                                                                                                                                                                                                                                                                                                                                                                                                                                                                                                                                                                                                                                                                                                                                                                                                                                                                                                                                                                                                                                                                                                                                                                                                                                                                                                                                                                                                                                                                                                                                                                                                                                                                                                                                                                                                                                                                                                                                                                                                                                                                                                                                                                                                                                                                                                                                                                                                                                                                                                                                                                                                                                                                                                                                                                                                                                                                                                                                                                        | -0.59489 | -0.49398 |          |          |   |          |          |          |   |          |          |          |   |          |          |          |   |          |         |          |   |          |          |          |   |          |          |          |   |          |         |          |   |          |         |          |   |         |         |         |   |         |         |         |   |          |         |          |   |          |         |         |   |         |         |         |   |          |         |         |   |         |         |         |   |          |          |          |   |          |          |          |   |         |         |         |   |          |          |         |   |          |         |          |   |         |          |         |   |         |          |          |   |         |          |          |   |         |          |          |   |         |          |          |   |         |          |         |   |         |          |         |   |         |          |         |   |         |         |         |   |          |          |         |   |          |          |         |   |          |          |         |   |          |          |         |   |          |          |         |   |          |          |         |   |          |          |         |   |          |          |         |   |          |          |         |   |          |          |          |                                                                                                                                                                                                                       |                                                                                                                                                                                                                                                                                                                                                                                                                                                                                                                                                                                                                                                                                                                                                                                                                                                                                                                                                                                                                                                                                                                                                                                                                                                                                                                                                                                                                                                                                                                                                                                                                                                                                                                                                                                                                                                                                                                                                                                                                                                                                                                                                                                                                                                                                                                                                                                                                                                                                                                                                                                                                                                                                                                                                                                                                                                                                                                                         |          |          |          |          |         |         |          |          |         |          |                                                                                                                                                                                                                         |                                                                                                                                                                                                                                                                                                                                                                                                                                                                                                                                                                                                                                                                                                                                                                                                                                                                                                                                                                                                                                                                                                                                                                                                                                                                                                                                                                                                                                                                                                                                                                                                                                                                                                                                                                                                                                                                                                                                                                                                                                                                                                                                                                                                                                                                                                                                                                                                                                                                                                                                                                                                                                                                                                                                                                                                                                                                                                                                                                                                                                                                                                                                                             |   |          |          |          |   |          |          |          |   |          |          |          |   |          |          |          |   |          |          |          |   |          |          |          |   |          |          |          |   |          |         |         |   |          |         |         |   |         |         |         |   |          |         |         |   |          |         |         |   |         |          |          |   |          |          |          |   |         |         |         |   |         |          |          |   |          |          |          |   |          |         |          |   |          |          |          |   |          |          |         |   |          |          |         |   |          |          |          |   |         |          |         |   |         |          |         |   |         |          |          |   |          |          |         |   |          |          |          |   |          |          |          |   |          |          |          |   |          |          |          |   |          |         |          |   |          |         |          |   |          |         |          |   |          |         |          |   |          |         |          |   |         |          |          |   |         |          |          |   |         |         |          |   |         |         |          |   |          |          |         |   |          |          |         |   |          |          |         |   |          |          |         |
| C                                                                                                                                                                                                                      | -0.01768                                                                                                                                                                                                                                                                                                                                                                                                                                                                                                                                                                                                                                                                                                                                                                                                                                                                                                                                                                                                                                                                                                                                                                                                                                                                                                                                                                                                                                                                                                                                                                                                                                                                                                                                                                                                                                                                                                                                                                                                                                                                                                                                                                                                                                                                                                                                                                                                                                                                                                                                                                                                                                                                                                                                                                                                                                                                                                                                                                                                                                                                                                                                                       | -2.92844 | -1.18364 |          |          |   |          |          |          |   |          |          |          |   |          |          |          |   |          |         |          |   |          |          |          |   |          |          |          |   |          |         |          |   |          |         |          |   |         |         |         |   |         |         |         |   |          |         |          |   |          |         |         |   |         |         |         |   |          |         |         |   |         |         |         |   |          |          |          |   |          |          |          |   |         |         |         |   |          |          |         |   |          |         |          |   |         |          |         |   |         |          |          |   |         |          |          |   |         |          |          |   |         |          |          |   |         |          |         |   |         |          |         |   |         |          |         |   |         |         |         |   |          |          |         |   |          |          |         |   |          |          |         |   |          |          |         |   |          |          |         |   |          |          |         |   |          |          |         |   |          |          |         |   |          |          |         |   |          |          |          |                                                                                                                                                                                                                       |                                                                                                                                                                                                                                                                                                                                                                                                                                                                                                                                                                                                                                                                                                                                                                                                                                                                                                                                                                                                                                                                                                                                                                                                                                                                                                                                                                                                                                                                                                                                                                                                                                                                                                                                                                                                                                                                                                                                                                                                                                                                                                                                                                                                                                                                                                                                                                                                                                                                                                                                                                                                                                                                                                                                                                                                                                                                                                                                         |          |          |          |          |         |         |          |          |         |          |                                                                                                                                                                                                                         |                                                                                                                                                                                                                                                                                                                                                                                                                                                                                                                                                                                                                                                                                                                                                                                                                                                                                                                                                                                                                                                                                                                                                                                                                                                                                                                                                                                                                                                                                                                                                                                                                                                                                                                                                                                                                                                                                                                                                                                                                                                                                                                                                                                                                                                                                                                                                                                                                                                                                                                                                                                                                                                                                                                                                                                                                                                                                                                                                                                                                                                                                                                                                             |   |          |          |          |   |          |          |          |   |          |          |          |   |          |          |          |   |          |          |          |   |          |          |          |   |          |          |          |   |          |         |         |   |          |         |         |   |         |         |         |   |          |         |         |   |          |         |         |   |         |          |          |   |          |          |          |   |         |         |         |   |         |          |          |   |          |          |          |   |          |         |          |   |          |          |          |   |          |          |         |   |          |          |         |   |          |          |          |   |         |          |         |   |         |          |         |   |         |          |          |   |          |          |         |   |          |          |          |   |          |          |          |   |          |          |          |   |          |          |          |   |          |         |          |   |          |         |          |   |          |         |          |   |          |         |          |   |          |         |          |   |         |          |          |   |         |          |          |   |         |         |          |   |         |         |          |   |          |          |         |   |          |          |         |   |          |          |         |   |          |          |         |
| C                                                                                                                                                                                                                      | 0.38217                                                                                                                                                                                                                                                                                                                                                                                                                                                                                                                                                                                                                                                                                                                                                                                                                                                                                                                                                                                                                                                                                                                                                                                                                                                                                                                                                                                                                                                                                                                                                                                                                                                                                                                                                                                                                                                                                                                                                                                                                                                                                                                                                                                                                                                                                                                                                                                                                                                                                                                                                                                                                                                                                                                                                                                                                                                                                                                                                                                                                                                                                                                                                        | -1.29436 | -2.85106 |          |          |   |          |          |          |   |          |          |          |   |          |          |          |   |          |         |          |   |          |          |          |   |          |          |          |   |          |         |          |   |          |         |          |   |         |         |         |   |         |         |         |   |          |         |          |   |          |         |         |   |         |         |         |   |          |         |         |   |         |         |         |   |          |          |          |   |          |          |          |   |         |         |         |   |          |          |         |   |          |         |          |   |         |          |         |   |         |          |          |   |         |          |          |   |         |          |          |   |         |          |          |   |         |          |         |   |         |          |         |   |         |          |         |   |         |         |         |   |          |          |         |   |          |          |         |   |          |          |         |   |          |          |         |   |          |          |         |   |          |          |         |   |          |          |         |   |          |          |         |   |          |          |         |   |          |          |          |                                                                                                                                                                                                                       |                                                                                                                                                                                                                                                                                                                                                                                                                                                                                                                                                                                                                                                                                                                                                                                                                                                                                                                                                                                                                                                                                                                                                                                                                                                                                                                                                                                                                                                                                                                                                                                                                                                                                                                                                                                                                                                                                                                                                                                                                                                                                                                                                                                                                                                                                                                                                                                                                                                                                                                                                                                                                                                                                                                                                                                                                                                                                                                                         |          |          |          |          |         |         |          |          |         |          |                                                                                                                                                                                                                         |                                                                                                                                                                                                                                                                                                                                                                                                                                                                                                                                                                                                                                                                                                                                                                                                                                                                                                                                                                                                                                                                                                                                                                                                                                                                                                                                                                                                                                                                                                                                                                                                                                                                                                                                                                                                                                                                                                                                                                                                                                                                                                                                                                                                                                                                                                                                                                                                                                                                                                                                                                                                                                                                                                                                                                                                                                                                                                                                                                                                                                                                                                                                                             |   |          |          |          |   |          |          |          |   |          |          |          |   |          |          |          |   |          |          |          |   |          |          |          |   |          |          |          |   |          |         |         |   |          |         |         |   |         |         |         |   |          |         |         |   |          |         |         |   |         |          |          |   |          |          |          |   |         |         |         |   |         |          |          |   |          |          |          |   |          |         |          |   |          |          |          |   |          |          |         |   |          |          |         |   |          |          |          |   |         |          |         |   |         |          |         |   |         |          |          |   |          |          |         |   |          |          |          |   |          |          |          |   |          |          |          |   |          |          |          |   |          |         |          |   |          |         |          |   |          |         |          |   |          |         |          |   |          |         |          |   |         |          |          |   |         |          |          |   |         |         |          |   |         |         |          |   |          |          |         |   |          |          |         |   |          |          |         |   |          |          |         |
| C                                                                                                                                                                                                                      | 0.39252                                                                                                                                                                                                                                                                                                                                                                                                                                                                                                                                                                                                                                                                                                                                                                                                                                                                                                                                                                                                                                                                                                                                                                                                                                                                                                                                                                                                                                                                                                                                                                                                                                                                                                                                                                                                                                                                                                                                                                                                                                                                                                                                                                                                                                                                                                                                                                                                                                                                                                                                                                                                                                                                                                                                                                                                                                                                                                                                                                                                                                                                                                                                                        | -0.33586 | -1.85237 |          |          |   |          |          |          |   |          |          |          |   |          |          |          |   |          |         |          |   |          |          |          |   |          |          |          |   |          |         |          |   |          |         |          |   |         |         |         |   |         |         |         |   |          |         |          |   |          |         |         |   |         |         |         |   |          |         |         |   |         |         |         |   |          |          |          |   |          |          |          |   |         |         |         |   |          |          |         |   |          |         |          |   |         |          |         |   |         |          |          |   |         |          |          |   |         |          |          |   |         |          |          |   |         |          |         |   |         |          |         |   |         |          |         |   |         |         |         |   |          |          |         |   |          |          |         |   |          |          |         |   |          |          |         |   |          |          |         |   |          |          |         |   |          |          |         |   |          |          |         |   |          |          |         |   |          |          |          |                                                                                                                                                                                                                       |                                                                                                                                                                                                                                                                                                                                                                                                                                                                                                                                                                                                                                                                                                                                                                                                                                                                                                                                                                                                                                                                                                                                                                                                                                                                                                                                                                                                                                                                                                                                                                                                                                                                                                                                                                                                                                                                                                                                                                                                                                                                                                                                                                                                                                                                                                                                                                                                                                                                                                                                                                                                                                                                                                                                                                                                                                                                                                                                         |          |          |          |          |         |         |          |          |         |          |                                                                                                                                                                                                                         |                                                                                                                                                                                                                                                                                                                                                                                                                                                                                                                                                                                                                                                                                                                                                                                                                                                                                                                                                                                                                                                                                                                                                                                                                                                                                                                                                                                                                                                                                                                                                                                                                                                                                                                                                                                                                                                                                                                                                                                                                                                                                                                                                                                                                                                                                                                                                                                                                                                                                                                                                                                                                                                                                                                                                                                                                                                                                                                                                                                                                                                                                                                                                             |   |          |          |          |   |          |          |          |   |          |          |          |   |          |          |          |   |          |          |          |   |          |          |          |   |          |          |          |   |          |         |         |   |          |         |         |   |         |         |         |   |          |         |         |   |          |         |         |   |         |          |          |   |          |          |          |   |         |         |         |   |         |          |          |   |          |          |          |   |          |         |          |   |          |          |          |   |          |          |         |   |          |          |         |   |          |          |          |   |         |          |         |   |         |          |         |   |         |          |          |   |          |          |         |   |          |          |          |   |          |          |          |   |          |          |          |   |          |          |          |   |          |         |          |   |          |         |          |   |          |         |          |   |          |         |          |   |          |         |          |   |         |          |          |   |         |          |          |   |         |         |          |   |         |         |          |   |          |          |         |   |          |          |         |   |          |          |         |   |          |          |         |
| C                                                                                                                                                                                                                      | 0.06601                                                                                                                                                                                                                                                                                                                                                                                                                                                                                                                                                                                                                                                                                                                                                                                                                                                                                                                                                                                                                                                                                                                                                                                                                                                                                                                                                                                                                                                                                                                                                                                                                                                                                                                                                                                                                                                                                                                                                                                                                                                                                                                                                                                                                                                                                                                                                                                                                                                                                                                                                                                                                                                                                                                                                                                                                                                                                                                                                                                                                                                                                                                                                        | -1.98690 | -0.15059 |          |          |   |          |          |          |   |          |          |          |   |          |          |          |   |          |         |          |   |          |          |          |   |          |          |          |   |          |         |          |   |          |         |          |   |         |         |         |   |         |         |         |   |          |         |          |   |          |         |         |   |         |         |         |   |          |         |         |   |         |         |         |   |          |          |          |   |          |          |          |   |         |         |         |   |          |          |         |   |          |         |          |   |         |          |         |   |         |          |          |   |         |          |          |   |         |          |          |   |         |          |          |   |         |          |         |   |         |          |         |   |         |          |         |   |         |         |         |   |          |          |         |   |          |          |         |   |          |          |         |   |          |          |         |   |          |          |         |   |          |          |         |   |          |          |         |   |          |          |         |   |          |          |         |   |          |          |          |                                                                                                                                                                                                                       |                                                                                                                                                                                                                                                                                                                                                                                                                                                                                                                                                                                                                                                                                                                                                                                                                                                                                                                                                                                                                                                                                                                                                                                                                                                                                                                                                                                                                                                                                                                                                                                                                                                                                                                                                                                                                                                                                                                                                                                                                                                                                                                                                                                                                                                                                                                                                                                                                                                                                                                                                                                                                                                                                                                                                                                                                                                                                                                                         |          |          |          |          |         |         |          |          |         |          |                                                                                                                                                                                                                         |                                                                                                                                                                                                                                                                                                                                                                                                                                                                                                                                                                                                                                                                                                                                                                                                                                                                                                                                                                                                                                                                                                                                                                                                                                                                                                                                                                                                                                                                                                                                                                                                                                                                                                                                                                                                                                                                                                                                                                                                                                                                                                                                                                                                                                                                                                                                                                                                                                                                                                                                                                                                                                                                                                                                                                                                                                                                                                                                                                                                                                                                                                                                                             |   |          |          |          |   |          |          |          |   |          |          |          |   |          |          |          |   |          |          |          |   |          |          |          |   |          |          |          |   |          |         |         |   |          |         |         |   |         |         |         |   |          |         |         |   |          |         |         |   |         |          |          |   |          |          |          |   |         |         |         |   |         |          |          |   |          |          |          |   |          |         |          |   |          |          |          |   |          |          |         |   |          |          |         |   |          |          |          |   |         |          |         |   |         |          |         |   |         |          |          |   |          |          |         |   |          |          |          |   |          |          |          |   |          |          |          |   |          |          |          |   |          |         |          |   |          |         |          |   |          |         |          |   |          |         |          |   |          |         |          |   |         |          |          |   |         |          |          |   |         |         |          |   |         |         |          |   |          |          |         |   |          |          |         |   |          |          |         |   |          |          |         |
| H                                                                                                                                                                                                                      | -0.13268                                                                                                                                                                                                                                                                                                                                                                                                                                                                                                                                                                                                                                                                                                                                                                                                                                                                                                                                                                                                                                                                                                                                                                                                                                                                                                                                                                                                                                                                                                                                                                                                                                                                                                                                                                                                                                                                                                                                                                                                                                                                                                                                                                                                                                                                                                                                                                                                                                                                                                                                                                                                                                                                                                                                                                                                                                                                                                                                                                                                                                                                                                                                                       | -3.96920 | -0.91563 |          |          |   |          |          |          |   |          |          |          |   |          |          |          |   |          |         |          |   |          |          |          |   |          |          |          |   |          |         |          |   |          |         |          |   |         |         |         |   |         |         |         |   |          |         |          |   |          |         |         |   |         |         |         |   |          |         |         |   |         |         |         |   |          |          |          |   |          |          |          |   |         |         |         |   |          |          |         |   |          |         |          |   |         |          |         |   |         |          |          |   |         |          |          |   |         |          |          |   |         |          |          |   |         |          |         |   |         |          |         |   |         |          |         |   |         |         |         |   |          |          |         |   |          |          |         |   |          |          |         |   |          |          |         |   |          |          |         |   |          |          |         |   |          |          |         |   |          |          |         |   |          |          |         |   |          |          |          |                                                                                                                                                                                                                       |                                                                                                                                                                                                                                                                                                                                                                                                                                                                                                                                                                                                                                                                                                                                                                                                                                                                                                                                                                                                                                                                                                                                                                                                                                                                                                                                                                                                                                                                                                                                                                                                                                                                                                                                                                                                                                                                                                                                                                                                                                                                                                                                                                                                                                                                                                                                                                                                                                                                                                                                                                                                                                                                                                                                                                                                                                                                                                                                         |          |          |          |          |         |         |          |          |         |          |                                                                                                                                                                                                                         |                                                                                                                                                                                                                                                                                                                                                                                                                                                                                                                                                                                                                                                                                                                                                                                                                                                                                                                                                                                                                                                                                                                                                                                                                                                                                                                                                                                                                                                                                                                                                                                                                                                                                                                                                                                                                                                                                                                                                                                                                                                                                                                                                                                                                                                                                                                                                                                                                                                                                                                                                                                                                                                                                                                                                                                                                                                                                                                                                                                                                                                                                                                                                             |   |          |          |          |   |          |          |          |   |          |          |          |   |          |          |          |   |          |          |          |   |          |          |          |   |          |          |          |   |          |         |         |   |          |         |         |   |         |         |         |   |          |         |         |   |          |         |         |   |         |          |          |   |          |          |          |   |         |         |         |   |         |          |          |   |          |          |          |   |          |         |          |   |          |          |          |   |          |          |         |   |          |          |         |   |          |          |          |   |         |          |         |   |         |          |         |   |         |          |          |   |          |          |         |   |          |          |          |   |          |          |          |   |          |          |          |   |          |          |          |   |          |         |          |   |          |         |          |   |          |         |          |   |          |         |          |   |          |         |          |   |         |          |          |   |         |          |          |   |         |         |          |   |         |         |          |   |          |          |         |   |          |          |         |   |          |          |         |   |          |          |         |
| C                                                                                                                                                                                                                      | -0.07681                                                                                                                                                                                                                                                                                                                                                                                                                                                                                                                                                                                                                                                                                                                                                                                                                                                                                                                                                                                                                                                                                                                                                                                                                                                                                                                                                                                                                                                                                                                                                                                                                                                                                                                                                                                                                                                                                                                                                                                                                                                                                                                                                                                                                                                                                                                                                                                                                                                                                                                                                                                                                                                                                                                                                                                                                                                                                                                                                                                                                                                                                                                                                       | 0.56386  | 0.45743  |          |          |   |          |          |          |   |          |          |          |   |          |          |          |   |          |         |          |   |          |          |          |   |          |          |          |   |          |         |          |   |          |         |          |   |         |         |         |   |         |         |         |   |          |         |          |   |          |         |         |   |         |         |         |   |          |         |         |   |         |         |         |   |          |          |          |   |          |          |          |   |         |         |         |   |          |          |         |   |          |         |          |   |         |          |         |   |         |          |          |   |         |          |          |   |         |          |          |   |         |          |          |   |         |          |         |   |         |          |         |   |         |          |         |   |         |         |         |   |          |          |         |   |          |          |         |   |          |          |         |   |          |          |         |   |          |          |         |   |          |          |         |   |          |          |         |   |          |          |         |   |          |          |         |   |          |          |          |                                                                                                                                                                                                                       |                                                                                                                                                                                                                                                                                                                                                                                                                                                                                                                                                                                                                                                                                                                                                                                                                                                                                                                                                                                                                                                                                                                                                                                                                                                                                                                                                                                                                                                                                                                                                                                                                                                                                                                                                                                                                                                                                                                                                                                                                                                                                                                                                                                                                                                                                                                                                                                                                                                                                                                                                                                                                                                                                                                                                                                                                                                                                                                                         |          |          |          |          |         |         |          |          |         |          |                                                                                                                                                                                                                         |                                                                                                                                                                                                                                                                                                                                                                                                                                                                                                                                                                                                                                                                                                                                                                                                                                                                                                                                                                                                                                                                                                                                                                                                                                                                                                                                                                                                                                                                                                                                                                                                                                                                                                                                                                                                                                                                                                                                                                                                                                                                                                                                                                                                                                                                                                                                                                                                                                                                                                                                                                                                                                                                                                                                                                                                                                                                                                                                                                                                                                                                                                                                                             |   |          |          |          |   |          |          |          |   |          |          |          |   |          |          |          |   |          |          |          |   |          |          |          |   |          |          |          |   |          |         |         |   |          |         |         |   |         |         |         |   |          |         |         |   |          |         |         |   |         |          |          |   |          |          |          |   |         |         |         |   |         |          |          |   |          |          |          |   |          |         |          |   |          |          |          |   |          |          |         |   |          |          |         |   |          |          |          |   |         |          |         |   |         |          |         |   |         |          |          |   |          |          |         |   |          |          |          |   |          |          |          |   |          |          |          |   |          |          |          |   |          |         |          |   |          |         |          |   |          |         |          |   |          |         |          |   |          |         |          |   |         |          |          |   |         |          |          |   |         |         |          |   |         |         |          |   |          |          |         |   |          |          |         |   |          |          |         |   |          |          |         |
| C                                                                                                                                                                                                                      | -0.05556                                                                                                                                                                                                                                                                                                                                                                                                                                                                                                                                                                                                                                                                                                                                                                                                                                                                                                                                                                                                                                                                                                                                                                                                                                                                                                                                                                                                                                                                                                                                                                                                                                                                                                                                                                                                                                                                                                                                                                                                                                                                                                                                                                                                                                                                                                                                                                                                                                                                                                                                                                                                                                                                                                                                                                                                                                                                                                                                                                                                                                                                                                                                                       | 2.57798  | 2.48912  |          |          |   |          |          |          |   |          |          |          |   |          |          |          |   |          |         |          |   |          |          |          |   |          |          |          |   |          |         |          |   |          |         |          |   |         |         |         |   |         |         |         |   |          |         |          |   |          |         |         |   |         |         |         |   |          |         |         |   |         |         |         |   |          |          |          |   |          |          |          |   |         |         |         |   |          |          |         |   |          |         |          |   |         |          |         |   |         |          |          |   |         |          |          |   |         |          |          |   |         |          |          |   |         |          |         |   |         |          |         |   |         |          |         |   |         |         |         |   |          |          |         |   |          |          |         |   |          |          |         |   |          |          |         |   |          |          |         |   |          |          |         |   |          |          |         |   |          |          |         |   |          |          |         |   |          |          |          |                                                                                                                                                                                                                       |                                                                                                                                                                                                                                                                                                                                                                                                                                                                                                                                                                                                                                                                                                                                                                                                                                                                                                                                                                                                                                                                                                                                                                                                                                                                                                                                                                                                                                                                                                                                                                                                                                                                                                                                                                                                                                                                                                                                                                                                                                                                                                                                                                                                                                                                                                                                                                                                                                                                                                                                                                                                                                                                                                                                                                                                                                                                                                                                         |          |          |          |          |         |         |          |          |         |          |                                                                                                                                                                                                                         |                                                                                                                                                                                                                                                                                                                                                                                                                                                                                                                                                                                                                                                                                                                                                                                                                                                                                                                                                                                                                                                                                                                                                                                                                                                                                                                                                                                                                                                                                                                                                                                                                                                                                                                                                                                                                                                                                                                                                                                                                                                                                                                                                                                                                                                                                                                                                                                                                                                                                                                                                                                                                                                                                                                                                                                                                                                                                                                                                                                                                                                                                                                                                             |   |          |          |          |   |          |          |          |   |          |          |          |   |          |          |          |   |          |          |          |   |          |          |          |   |          |          |          |   |          |         |         |   |          |         |         |   |         |         |         |   |          |         |         |   |          |         |         |   |         |          |          |   |          |          |          |   |         |         |         |   |         |          |          |   |          |          |          |   |          |         |          |   |          |          |          |   |          |          |         |   |          |          |         |   |          |          |          |   |         |          |         |   |         |          |         |   |         |          |          |   |          |          |         |   |          |          |          |   |          |          |          |   |          |          |          |   |          |          |          |   |          |         |          |   |          |         |          |   |          |         |          |   |          |         |          |   |          |         |          |   |         |          |          |   |         |          |          |   |         |         |          |   |         |         |          |   |          |          |         |   |          |          |         |   |          |          |         |   |          |          |         |
| C                                                                                                                                                                                                                      | -0.03227                                                                                                                                                                                                                                                                                                                                                                                                                                                                                                                                                                                                                                                                                                                                                                                                                                                                                                                                                                                                                                                                                                                                                                                                                                                                                                                                                                                                                                                                                                                                                                                                                                                                                                                                                                                                                                                                                                                                                                                                                                                                                                                                                                                                                                                                                                                                                                                                                                                                                                                                                                                                                                                                                                                                                                                                                                                                                                                                                                                                                                                                                                                                                       | 1.95583  | 0.11412  |          |          |   |          |          |          |   |          |          |          |   |          |          |          |   |          |         |          |   |          |          |          |   |          |          |          |   |          |         |          |   |          |         |          |   |         |         |         |   |         |         |         |   |          |         |          |   |          |         |         |   |         |         |         |   |          |         |         |   |         |         |         |   |          |          |          |   |          |          |          |   |         |         |         |   |          |          |         |   |          |         |          |   |         |          |         |   |         |          |          |   |         |          |          |   |         |          |          |   |         |          |          |   |         |          |         |   |         |          |         |   |         |          |         |   |         |         |         |   |          |          |         |   |          |          |         |   |          |          |         |   |          |          |         |   |          |          |         |   |          |          |         |   |          |          |         |   |          |          |         |   |          |          |         |   |          |          |          |                                                                                                                                                                                                                       |                                                                                                                                                                                                                                                                                                                                                                                                                                                                                                                                                                                                                                                                                                                                                                                                                                                                                                                                                                                                                                                                                                                                                                                                                                                                                                                                                                                                                                                                                                                                                                                                                                                                                                                                                                                                                                                                                                                                                                                                                                                                                                                                                                                                                                                                                                                                                                                                                                                                                                                                                                                                                                                                                                                                                                                                                                                                                                                                         |          |          |          |          |         |         |          |          |         |          |                                                                                                                                                                                                                         |                                                                                                                                                                                                                                                                                                                                                                                                                                                                                                                                                                                                                                                                                                                                                                                                                                                                                                                                                                                                                                                                                                                                                                                                                                                                                                                                                                                                                                                                                                                                                                                                                                                                                                                                                                                                                                                                                                                                                                                                                                                                                                                                                                                                                                                                                                                                                                                                                                                                                                                                                                                                                                                                                                                                                                                                                                                                                                                                                                                                                                                                                                                                                             |   |          |          |          |   |          |          |          |   |          |          |          |   |          |          |          |   |          |          |          |   |          |          |          |   |          |          |          |   |          |         |         |   |          |         |         |   |         |         |         |   |          |         |         |   |          |         |         |   |         |          |          |   |          |          |          |   |         |         |         |   |         |          |          |   |          |          |          |   |          |         |          |   |          |          |          |   |          |          |         |   |          |          |         |   |          |          |          |   |         |          |         |   |         |          |         |   |         |          |          |   |          |          |         |   |          |          |          |   |          |          |          |   |          |          |          |   |          |          |          |   |          |         |          |   |          |         |          |   |          |         |          |   |          |         |          |   |          |         |          |   |         |          |          |   |         |          |          |   |         |         |          |   |         |         |          |   |          |          |         |   |          |          |         |   |          |          |         |   |          |          |         |
| C                                                                                                                                                                                                                      | -0.35903                                                                                                                                                                                                                                                                                                                                                                                                                                                                                                                                                                                                                                                                                                                                                                                                                                                                                                                                                                                                                                                                                                                                                                                                                                                                                                                                                                                                                                                                                                                                                                                                                                                                                                                                                                                                                                                                                                                                                                                                                                                                                                                                                                                                                                                                                                                                                                                                                                                                                                                                                                                                                                                                                                                                                                                                                                                                                                                                                                                                                                                                                                                                                       | 0.30509  | 1.81609  |          |          |   |          |          |          |   |          |          |          |   |          |          |          |   |          |         |          |   |          |          |          |   |          |          |          |   |          |         |          |   |          |         |          |   |         |         |         |   |         |         |         |   |          |         |          |   |          |         |         |   |         |         |         |   |          |         |         |   |         |         |         |   |          |          |          |   |          |          |          |   |         |         |         |   |          |          |         |   |          |         |          |   |         |          |         |   |         |          |          |   |         |          |          |   |         |          |          |   |         |          |          |   |         |          |         |   |         |          |         |   |         |          |         |   |         |         |         |   |          |          |         |   |          |          |         |   |          |          |         |   |          |          |         |   |          |          |         |   |          |          |         |   |          |          |         |   |          |          |         |   |          |          |         |   |          |          |          |                                                                                                                                                                                                                       |                                                                                                                                                                                                                                                                                                                                                                                                                                                                                                                                                                                                                                                                                                                                                                                                                                                                                                                                                                                                                                                                                                                                                                                                                                                                                                                                                                                                                                                                                                                                                                                                                                                                                                                                                                                                                                                                                                                                                                                                                                                                                                                                                                                                                                                                                                                                                                                                                                                                                                                                                                                                                                                                                                                                                                                                                                                                                                                                         |          |          |          |          |         |         |          |          |         |          |                                                                                                                                                                                                                         |                                                                                                                                                                                                                                                                                                                                                                                                                                                                                                                                                                                                                                                                                                                                                                                                                                                                                                                                                                                                                                                                                                                                                                                                                                                                                                                                                                                                                                                                                                                                                                                                                                                                                                                                                                                                                                                                                                                                                                                                                                                                                                                                                                                                                                                                                                                                                                                                                                                                                                                                                                                                                                                                                                                                                                                                                                                                                                                                                                                                                                                                                                                                                             |   |          |          |          |   |          |          |          |   |          |          |          |   |          |          |          |   |          |          |          |   |          |          |          |   |          |          |          |   |          |         |         |   |          |         |         |   |         |         |         |   |          |         |         |   |          |         |         |   |         |          |          |   |          |          |          |   |         |         |         |   |         |          |          |   |          |          |          |   |          |         |          |   |          |          |          |   |          |          |         |   |          |          |         |   |          |          |          |   |         |          |         |   |         |          |         |   |         |          |          |   |          |          |         |   |          |          |          |   |          |          |          |   |          |          |          |   |          |          |          |   |          |         |          |   |          |         |          |   |          |         |          |   |          |         |          |   |          |         |          |   |         |          |          |   |         |          |          |   |         |         |          |   |         |         |          |   |          |          |         |   |          |          |         |   |          |          |         |   |          |          |         |
| C                                                                                                                                                                                                                      | -0.34563                                                                                                                                                                                                                                                                                                                                                                                                                                                                                                                                                                                                                                                                                                                                                                                                                                                                                                                                                                                                                                                                                                                                                                                                                                                                                                                                                                                                                                                                                                                                                                                                                                                                                                                                                                                                                                                                                                                                                                                                                                                                                                                                                                                                                                                                                                                                                                                                                                                                                                                                                                                                                                                                                                                                                                                                                                                                                                                                                                                                                                                                                                                                                       | 1.26344  | 2.81490  |          |          |   |          |          |          |   |          |          |          |   |          |          |          |   |          |         |          |   |          |          |          |   |          |          |          |   |          |         |          |   |          |         |          |   |         |         |         |   |         |         |         |   |          |         |          |   |          |         |         |   |         |         |         |   |          |         |         |   |         |         |         |   |          |          |          |   |          |          |          |   |         |         |         |   |          |          |         |   |          |         |          |   |         |          |         |   |         |          |          |   |         |          |          |   |         |          |          |   |         |          |          |   |         |          |         |   |         |          |         |   |         |          |         |   |         |         |         |   |          |          |         |   |          |          |         |   |          |          |         |   |          |          |         |   |          |          |         |   |          |          |         |   |          |          |         |   |          |          |         |   |          |          |         |   |          |          |          |                                                                                                                                                                                                                       |                                                                                                                                                                                                                                                                                                                                                                                                                                                                                                                                                                                                                                                                                                                                                                                                                                                                                                                                                                                                                                                                                                                                                                                                                                                                                                                                                                                                                                                                                                                                                                                                                                                                                                                                                                                                                                                                                                                                                                                                                                                                                                                                                                                                                                                                                                                                                                                                                                                                                                                                                                                                                                                                                                                                                                                                                                                                                                                                         |          |          |          |          |         |         |          |          |         |          |                                                                                                                                                                                                                         |                                                                                                                                                                                                                                                                                                                                                                                                                                                                                                                                                                                                                                                                                                                                                                                                                                                                                                                                                                                                                                                                                                                                                                                                                                                                                                                                                                                                                                                                                                                                                                                                                                                                                                                                                                                                                                                                                                                                                                                                                                                                                                                                                                                                                                                                                                                                                                                                                                                                                                                                                                                                                                                                                                                                                                                                                                                                                                                                                                                                                                                                                                                                                             |   |          |          |          |   |          |          |          |   |          |          |          |   |          |          |          |   |          |          |          |   |          |          |          |   |          |          |          |   |          |         |         |   |          |         |         |   |         |         |         |   |          |         |         |   |          |         |         |   |         |          |          |   |          |          |          |   |         |         |         |   |         |          |          |   |          |          |          |   |          |         |          |   |          |          |          |   |          |          |         |   |          |          |         |   |          |          |          |   |         |          |         |   |         |          |         |   |         |          |          |   |          |          |         |   |          |          |          |   |          |          |          |   |          |          |          |   |          |          |          |   |          |         |          |   |          |         |          |   |          |         |          |   |          |         |          |   |          |         |          |   |         |          |          |   |         |          |          |   |         |         |          |   |         |         |          |   |          |          |         |   |          |          |         |   |          |          |         |   |          |          |         |
| C                                                                                                                                                                                                                      | 0.05442                                                                                                                                                                                                                                                                                                                                                                                                                                                                                                                                                                                                                                                                                                                                                                                                                                                                                                                                                                                                                                                                                                                                                                                                                                                                                                                                                                                                                                                                                                                                                                                                                                                                                                                                                                                                                                                                                                                                                                                                                                                                                                                                                                                                                                                                                                                                                                                                                                                                                                                                                                                                                                                                                                                                                                                                                                                                                                                                                                                                                                                                                                                                                        | 2.89710  | 1.14715  |          |          |   |          |          |          |   |          |          |          |   |          |          |          |   |          |         |          |   |          |          |          |   |          |          |          |   |          |         |          |   |          |         |          |   |         |         |         |   |         |         |         |   |          |         |          |   |          |         |         |   |         |         |         |   |          |         |         |   |         |         |         |   |          |          |          |   |          |          |          |   |         |         |         |   |          |          |         |   |          |         |          |   |         |          |         |   |         |          |          |   |         |          |          |   |         |          |          |   |         |          |          |   |         |          |         |   |         |          |         |   |         |          |         |   |         |         |         |   |          |          |         |   |          |          |         |   |          |          |         |   |          |          |         |   |          |          |         |   |          |          |         |   |          |          |         |   |          |          |         |   |          |          |         |   |          |          |          |                                                                                                                                                                                                                       |                                                                                                                                                                                                                                                                                                                                                                                                                                                                                                                                                                                                                                                                                                                                                                                                                                                                                                                                                                                                                                                                                                                                                                                                                                                                                                                                                                                                                                                                                                                                                                                                                                                                                                                                                                                                                                                                                                                                                                                                                                                                                                                                                                                                                                                                                                                                                                                                                                                                                                                                                                                                                                                                                                                                                                                                                                                                                                                                         |          |          |          |          |         |         |          |          |         |          |                                                                                                                                                                                                                         |                                                                                                                                                                                                                                                                                                                                                                                                                                                                                                                                                                                                                                                                                                                                                                                                                                                                                                                                                                                                                                                                                                                                                                                                                                                                                                                                                                                                                                                                                                                                                                                                                                                                                                                                                                                                                                                                                                                                                                                                                                                                                                                                                                                                                                                                                                                                                                                                                                                                                                                                                                                                                                                                                                                                                                                                                                                                                                                                                                                                                                                                                                                                                             |   |          |          |          |   |          |          |          |   |          |          |          |   |          |          |          |   |          |          |          |   |          |          |          |   |          |          |          |   |          |         |         |   |          |         |         |   |         |         |         |   |          |         |         |   |          |         |         |   |         |          |          |   |          |          |          |   |         |         |         |   |         |          |          |   |          |          |          |   |          |         |          |   |          |          |          |   |          |          |         |   |          |          |         |   |          |          |          |   |         |          |         |   |         |          |         |   |         |          |          |   |          |          |         |   |          |          |          |   |          |          |          |   |          |          |          |   |          |          |          |   |          |         |          |   |          |         |          |   |          |         |          |   |          |         |          |   |          |         |          |   |         |          |          |   |         |          |          |   |         |         |          |   |         |         |          |   |          |          |         |   |          |          |         |   |          |          |         |   |          |          |         |
| H                                                                                                                                                                                                                      | -0.55829                                                                                                                                                                                                                                                                                                                                                                                                                                                                                                                                                                                                                                                                                                                                                                                                                                                                                                                                                                                                                                                                                                                                                                                                                                                                                                                                                                                                                                                                                                                                                                                                                                                                                                                                                                                                                                                                                                                                                                                                                                                                                                                                                                                                                                                                                                                                                                                                                                                                                                                                                                                                                                                                                                                                                                                                                                                                                                                                                                                                                                                                                                                                                       | 0.97187  | 3.83519  |          |          |   |          |          |          |   |          |          |          |   |          |          |          |   |          |         |          |   |          |          |          |   |          |          |          |   |          |         |          |   |          |         |          |   |         |         |         |   |         |         |         |   |          |         |          |   |          |         |         |   |         |         |         |   |          |         |         |   |         |         |         |   |          |          |          |   |          |          |          |   |         |         |         |   |          |          |         |   |          |         |          |   |         |          |         |   |         |          |          |   |         |          |          |   |         |          |          |   |         |          |          |   |         |          |         |   |         |          |         |   |         |          |         |   |         |         |         |   |          |          |         |   |          |          |         |   |          |          |         |   |          |          |         |   |          |          |         |   |          |          |         |   |          |          |         |   |          |          |         |   |          |          |         |   |          |          |          |                                                                                                                                                                                                                       |                                                                                                                                                                                                                                                                                                                                                                                                                                                                                                                                                                                                                                                                                                                                                                                                                                                                                                                                                                                                                                                                                                                                                                                                                                                                                                                                                                                                                                                                                                                                                                                                                                                                                                                                                                                                                                                                                                                                                                                                                                                                                                                                                                                                                                                                                                                                                                                                                                                                                                                                                                                                                                                                                                                                                                                                                                                                                                                                         |          |          |          |          |         |         |          |          |         |          |                                                                                                                                                                                                                         |                                                                                                                                                                                                                                                                                                                                                                                                                                                                                                                                                                                                                                                                                                                                                                                                                                                                                                                                                                                                                                                                                                                                                                                                                                                                                                                                                                                                                                                                                                                                                                                                                                                                                                                                                                                                                                                                                                                                                                                                                                                                                                                                                                                                                                                                                                                                                                                                                                                                                                                                                                                                                                                                                                                                                                                                                                                                                                                                                                                                                                                                                                                                                             |   |          |          |          |   |          |          |          |   |          |          |          |   |          |          |          |   |          |          |          |   |          |          |          |   |          |          |          |   |          |         |         |   |          |         |         |   |         |         |         |   |          |         |         |   |          |         |         |   |         |          |          |   |          |          |          |   |         |         |         |   |         |          |          |   |          |          |          |   |          |         |          |   |          |          |          |   |          |          |         |   |          |          |         |   |          |          |          |   |         |          |         |   |         |          |         |   |         |          |          |   |          |          |         |   |          |          |          |   |          |          |          |   |          |          |          |   |          |          |          |   |          |         |          |   |          |         |          |   |          |         |          |   |          |         |          |   |          |         |          |   |         |          |          |   |         |          |          |   |         |         |          |   |         |         |          |   |          |          |         |   |          |          |         |   |          |          |         |   |          |          |         |
| H                                                                                                                                                                                                                      | 0.17126                                                                                                                                                                                                                                                                                                                                                                                                                                                                                                                                                                                                                                                                                                                                                                                                                                                                                                                                                                                                                                                                                                                                                                                                                                                                                                                                                                                                                                                                                                                                                                                                                                                                                                                                                                                                                                                                                                                                                                                                                                                                                                                                                                                                                                                                                                                                                                                                                                                                                                                                                                                                                                                                                                                                                                                                                                                                                                                                                                                                                                                                                                                                                        | 3.93767  | 0.87914  |          |          |   |          |          |          |   |          |          |          |   |          |          |          |   |          |         |          |   |          |          |          |   |          |          |          |   |          |         |          |   |          |         |          |   |         |         |         |   |         |         |         |   |          |         |          |   |          |         |         |   |         |         |         |   |          |         |         |   |         |         |         |   |          |          |          |   |          |          |          |   |         |         |         |   |          |          |         |   |          |         |          |   |         |          |         |   |         |          |          |   |         |          |          |   |         |          |          |   |         |          |          |   |         |          |         |   |         |          |         |   |         |          |         |   |         |         |         |   |          |          |         |   |          |          |         |   |          |          |         |   |          |          |         |   |          |          |         |   |          |          |         |   |          |          |         |   |          |          |         |   |          |          |         |   |          |          |          |                                                                                                                                                                                                                       |                                                                                                                                                                                                                                                                                                                                                                                                                                                                                                                                                                                                                                                                                                                                                                                                                                                                                                                                                                                                                                                                                                                                                                                                                                                                                                                                                                                                                                                                                                                                                                                                                                                                                                                                                                                                                                                                                                                                                                                                                                                                                                                                                                                                                                                                                                                                                                                                                                                                                                                                                                                                                                                                                                                                                                                                                                                                                                                                         |          |          |          |          |         |         |          |          |         |          |                                                                                                                                                                                                                         |                                                                                                                                                                                                                                                                                                                                                                                                                                                                                                                                                                                                                                                                                                                                                                                                                                                                                                                                                                                                                                                                                                                                                                                                                                                                                                                                                                                                                                                                                                                                                                                                                                                                                                                                                                                                                                                                                                                                                                                                                                                                                                                                                                                                                                                                                                                                                                                                                                                                                                                                                                                                                                                                                                                                                                                                                                                                                                                                                                                                                                                                                                                                                             |   |          |          |          |   |          |          |          |   |          |          |          |   |          |          |          |   |          |          |          |   |          |          |          |   |          |          |          |   |          |         |         |   |          |         |         |   |         |         |         |   |          |         |         |   |          |         |         |   |         |          |          |   |          |          |          |   |         |         |         |   |         |          |          |   |          |          |          |   |          |         |          |   |          |          |          |   |          |          |         |   |          |          |         |   |          |          |          |   |         |          |         |   |         |          |         |   |         |          |          |   |          |          |         |   |          |          |          |   |          |          |          |   |          |          |          |   |          |          |          |   |          |         |          |   |          |         |          |   |          |         |          |   |          |         |          |   |          |         |          |   |         |          |          |   |         |          |          |   |         |         |          |   |         |         |          |   |          |          |         |   |          |          |         |   |          |          |         |   |          |          |         |
| H                                                                                                                                                                                                                      | 0.59562                                                                                                                                                                                                                                                                                                                                                                                                                                                                                                                                                                                                                                                                                                                                                                                                                                                                                                                                                                                                                                                                                                                                                                                                                                                                                                                                                                                                                                                                                                                                                                                                                                                                                                                                                                                                                                                                                                                                                                                                                                                                                                                                                                                                                                                                                                                                                                                                                                                                                                                                                                                                                                                                                                                                                                                                                                                                                                                                                                                                                                                                                                                                                        | -1.00256 | -3.87112 |          |          |   |          |          |          |   |          |          |          |   |          |          |          |   |          |         |          |   |          |          |          |   |          |          |          |   |          |         |          |   |          |         |          |   |         |         |         |   |         |         |         |   |          |         |          |   |          |         |         |   |         |         |         |   |          |         |         |   |         |         |         |   |          |          |          |   |          |          |          |   |         |         |         |   |          |          |         |   |          |         |          |   |         |          |         |   |         |          |          |   |         |          |          |   |         |          |          |   |         |          |          |   |         |          |         |   |         |          |         |   |         |          |         |   |         |         |         |   |          |          |         |   |          |          |         |   |          |          |         |   |          |          |         |   |          |          |         |   |          |          |         |   |          |          |         |   |          |          |         |   |          |          |         |   |          |          |          |                                                                                                                                                                                                                       |                                                                                                                                                                                                                                                                                                                                                                                                                                                                                                                                                                                                                                                                                                                                                                                                                                                                                                                                                                                                                                                                                                                                                                                                                                                                                                                                                                                                                                                                                                                                                                                                                                                                                                                                                                                                                                                                                                                                                                                                                                                                                                                                                                                                                                                                                                                                                                                                                                                                                                                                                                                                                                                                                                                                                                                                                                                                                                                                         |          |          |          |          |         |         |          |          |         |          |                                                                                                                                                                                                                         |                                                                                                                                                                                                                                                                                                                                                                                                                                                                                                                                                                                                                                                                                                                                                                                                                                                                                                                                                                                                                                                                                                                                                                                                                                                                                                                                                                                                                                                                                                                                                                                                                                                                                                                                                                                                                                                                                                                                                                                                                                                                                                                                                                                                                                                                                                                                                                                                                                                                                                                                                                                                                                                                                                                                                                                                                                                                                                                                                                                                                                                                                                                                                             |   |          |          |          |   |          |          |          |   |          |          |          |   |          |          |          |   |          |          |          |   |          |          |          |   |          |          |          |   |          |         |         |   |          |         |         |   |         |         |         |   |          |         |         |   |          |         |         |   |         |          |          |   |          |          |          |   |         |         |         |   |         |          |          |   |          |          |          |   |          |         |          |   |          |          |          |   |          |          |         |   |          |          |         |   |          |          |          |   |         |          |         |   |         |          |         |   |         |          |          |   |          |          |         |   |          |          |          |   |          |          |          |   |          |          |          |   |          |          |          |   |          |         |          |   |          |         |          |   |          |         |          |   |          |         |          |   |          |         |          |   |         |          |          |   |         |          |          |   |         |         |          |   |         |         |          |   |          |          |         |   |          |          |         |   |          |          |         |   |          |          |         |
| H                                                                                                                                                                                                                      | 0.02251                                                                                                                                                                                                                                                                                                                                                                                                                                                                                                                                                                                                                                                                                                                                                                                                                                                                                                                                                                                                                                                                                                                                                                                                                                                                                                                                                                                                                                                                                                                                                                                                                                                                                                                                                                                                                                                                                                                                                                                                                                                                                                                                                                                                                                                                                                                                                                                                                                                                                                                                                                                                                                                                                                                                                                                                                                                                                                                                                                                                                                                                                                                                                        | -3.37878 | -3.28300 |          |          |   |          |          |          |   |          |          |          |   |          |          |          |   |          |         |          |   |          |          |          |   |          |          |          |   |          |         |          |   |          |         |          |   |         |         |         |   |         |         |         |   |          |         |          |   |          |         |         |   |         |         |         |   |          |         |         |   |         |         |         |   |          |          |          |   |          |          |          |   |         |         |         |   |          |          |         |   |          |         |          |   |         |          |         |   |         |          |          |   |         |          |          |   |         |          |          |   |         |          |          |   |         |          |         |   |         |          |         |   |         |          |         |   |         |         |         |   |          |          |         |   |          |          |         |   |          |          |         |   |          |          |         |   |          |          |         |   |          |          |         |   |          |          |         |   |          |          |         |   |          |          |         |   |          |          |          |                                                                                                                                                                                                                       |                                                                                                                                                                                                                                                                                                                                                                                                                                                                                                                                                                                                                                                                                                                                                                                                                                                                                                                                                                                                                                                                                                                                                                                                                                                                                                                                                                                                                                                                                                                                                                                                                                                                                                                                                                                                                                                                                                                                                                                                                                                                                                                                                                                                                                                                                                                                                                                                                                                                                                                                                                                                                                                                                                                                                                                                                                                                                                                                         |          |          |          |          |         |         |          |          |         |          |                                                                                                                                                                                                                         |                                                                                                                                                                                                                                                                                                                                                                                                                                                                                                                                                                                                                                                                                                                                                                                                                                                                                                                                                                                                                                                                                                                                                                                                                                                                                                                                                                                                                                                                                                                                                                                                                                                                                                                                                                                                                                                                                                                                                                                                                                                                                                                                                                                                                                                                                                                                                                                                                                                                                                                                                                                                                                                                                                                                                                                                                                                                                                                                                                                                                                                                                                                                                             |   |          |          |          |   |          |          |          |   |          |          |          |   |          |          |          |   |          |          |          |   |          |          |          |   |          |          |          |   |          |         |         |   |          |         |         |   |         |         |         |   |          |         |         |   |          |         |         |   |         |          |          |   |          |          |          |   |         |         |         |   |         |          |          |   |          |          |          |   |          |         |          |   |          |          |          |   |          |          |         |   |          |          |         |   |          |          |          |   |         |          |         |   |         |          |         |   |         |          |          |   |          |          |         |   |          |          |          |   |          |          |          |   |          |          |          |   |          |          |          |   |          |         |          |   |          |         |          |   |          |         |          |   |          |         |          |   |          |         |          |   |         |          |          |   |         |          |          |   |         |         |          |   |         |         |          |   |          |          |         |   |          |          |         |   |          |          |         |   |          |          |         |
| H                                                                                                                                                                                                                      | 0.01871                                                                                                                                                                                                                                                                                                                                                                                                                                                                                                                                                                                                                                                                                                                                                                                                                                                                                                                                                                                                                                                                                                                                                                                                                                                                                                                                                                                                                                                                                                                                                                                                                                                                                                                                                                                                                                                                                                                                                                                                                                                                                                                                                                                                                                                                                                                                                                                                                                                                                                                                                                                                                                                                                                                                                                                                                                                                                                                                                                                                                                                                                                                                                        | 3.34707  | 3.24669  |          |          |   |          |          |          |   |          |          |          |   |          |          |          |   |          |         |          |   |          |          |          |   |          |          |          |   |          |         |          |   |          |         |          |   |         |         |         |   |         |         |         |   |          |         |          |   |          |         |         |   |         |         |         |   |          |         |         |   |         |         |         |   |          |          |          |   |          |          |          |   |         |         |         |   |          |          |         |   |          |         |          |   |         |          |         |   |         |          |          |   |         |          |          |   |         |          |          |   |         |          |          |   |         |          |         |   |         |          |         |   |         |          |         |   |         |         |         |   |          |          |         |   |          |          |         |   |          |          |         |   |          |          |         |   |          |          |         |   |          |          |         |   |          |          |         |   |          |          |         |   |          |          |         |   |          |          |          |                                                                                                                                                                                                                       |                                                                                                                                                                                                                                                                                                                                                                                                                                                                                                                                                                                                                                                                                                                                                                                                                                                                                                                                                                                                                                                                                                                                                                                                                                                                                                                                                                                                                                                                                                                                                                                                                                                                                                                                                                                                                                                                                                                                                                                                                                                                                                                                                                                                                                                                                                                                                                                                                                                                                                                                                                                                                                                                                                                                                                                                                                                                                                                                         |          |          |          |          |         |         |          |          |         |          |                                                                                                                                                                                                                         |                                                                                                                                                                                                                                                                                                                                                                                                                                                                                                                                                                                                                                                                                                                                                                                                                                                                                                                                                                                                                                                                                                                                                                                                                                                                                                                                                                                                                                                                                                                                                                                                                                                                                                                                                                                                                                                                                                                                                                                                                                                                                                                                                                                                                                                                                                                                                                                                                                                                                                                                                                                                                                                                                                                                                                                                                                                                                                                                                                                                                                                                                                                                                             |   |          |          |          |   |          |          |          |   |          |          |          |   |          |          |          |   |          |          |          |   |          |          |          |   |          |          |          |   |          |         |         |   |          |         |         |   |         |         |         |   |          |         |         |   |          |         |         |   |         |          |          |   |          |          |          |   |         |         |         |   |         |          |          |   |          |          |          |   |          |         |          |   |          |          |          |   |          |          |         |   |          |          |         |   |          |          |          |   |         |          |         |   |         |          |         |   |         |          |          |   |          |          |         |   |          |          |          |   |          |          |          |   |          |          |          |   |          |          |          |   |          |         |          |   |          |         |          |   |          |         |          |   |          |         |          |   |          |         |          |   |         |          |          |   |         |          |          |   |         |         |          |   |         |         |          |   |          |          |         |   |          |          |         |   |          |          |         |   |          |          |         |
| H                                                                                                                                                                                                                      | 0.66208                                                                                                                                                                                                                                                                                                                                                                                                                                                                                                                                                                                                                                                                                                                                                                                                                                                                                                                                                                                                                                                                                                                                                                                                                                                                                                                                                                                                                                                                                                                                                                                                                                                                                                                                                                                                                                                                                                                                                                                                                                                                                                                                                                                                                                                                                                                                                                                                                                                                                                                                                                                                                                                                                                                                                                                                                                                                                                                                                                                                                                                                                                                                                        | 0.65237  | -2.15473 |          |          |   |          |          |          |   |          |          |          |   |          |          |          |   |          |         |          |   |          |          |          |   |          |          |          |   |          |         |          |   |          |         |          |   |         |         |         |   |         |         |         |   |          |         |          |   |          |         |         |   |         |         |         |   |          |         |         |   |         |         |         |   |          |          |          |   |          |          |          |   |         |         |         |   |          |          |         |   |          |         |          |   |         |          |         |   |         |          |          |   |         |          |          |   |         |          |          |   |         |          |          |   |         |          |         |   |         |          |         |   |         |          |         |   |         |         |         |   |          |          |         |   |          |          |         |   |          |          |         |   |          |          |         |   |          |          |         |   |          |          |         |   |          |          |         |   |          |          |         |   |          |          |         |   |          |          |          |                                                                                                                                                                                                                       |                                                                                                                                                                                                                                                                                                                                                                                                                                                                                                                                                                                                                                                                                                                                                                                                                                                                                                                                                                                                                                                                                                                                                                                                                                                                                                                                                                                                                                                                                                                                                                                                                                                                                                                                                                                                                                                                                                                                                                                                                                                                                                                                                                                                                                                                                                                                                                                                                                                                                                                                                                                                                                                                                                                                                                                                                                                                                                                                         |          |          |          |          |         |         |          |          |         |          |                                                                                                                                                                                                                         |                                                                                                                                                                                                                                                                                                                                                                                                                                                                                                                                                                                                                                                                                                                                                                                                                                                                                                                                                                                                                                                                                                                                                                                                                                                                                                                                                                                                                                                                                                                                                                                                                                                                                                                                                                                                                                                                                                                                                                                                                                                                                                                                                                                                                                                                                                                                                                                                                                                                                                                                                                                                                                                                                                                                                                                                                                                                                                                                                                                                                                                                                                                                                             |   |          |          |          |   |          |          |          |   |          |          |          |   |          |          |          |   |          |          |          |   |          |          |          |   |          |          |          |   |          |         |         |   |          |         |         |   |         |         |         |   |          |         |         |   |          |         |         |   |         |          |          |   |          |          |          |   |         |         |         |   |         |          |          |   |          |          |          |   |          |         |          |   |          |          |          |   |          |          |         |   |          |          |         |   |          |          |          |   |         |          |         |   |         |          |         |   |         |          |          |   |          |          |         |   |          |          |          |   |          |          |          |   |          |          |          |   |          |          |          |   |          |         |          |   |          |         |          |   |          |         |          |   |          |         |          |   |          |         |          |   |         |          |          |   |         |          |          |   |         |         |          |   |         |         |          |   |          |          |         |   |          |          |         |   |          |          |         |   |          |          |         |
| H                                                                                                                                                                                                                      | -0.62938                                                                                                                                                                                                                                                                                                                                                                                                                                                                                                                                                                                                                                                                                                                                                                                                                                                                                                                                                                                                                                                                                                                                                                                                                                                                                                                                                                                                                                                                                                                                                                                                                                                                                                                                                                                                                                                                                                                                                                                                                                                                                                                                                                                                                                                                                                                                                                                                                                                                                                                                                                                                                                                                                                                                                                                                                                                                                                                                                                                                                                                                                                                                                       | -0.68283 | 2.11866  |          |          |   |          |          |          |   |          |          |          |   |          |          |          |   |          |         |          |   |          |          |          |   |          |          |          |   |          |         |          |   |          |         |          |   |         |         |         |   |         |         |         |   |          |         |          |   |          |         |         |   |         |         |         |   |          |         |         |   |         |         |         |   |          |          |          |   |          |          |          |   |         |         |         |   |          |          |         |   |          |         |          |   |         |          |         |   |         |          |          |   |         |          |          |   |         |          |          |   |         |          |          |   |         |          |         |   |         |          |         |   |         |          |         |   |         |         |         |   |          |          |         |   |          |          |         |   |          |          |         |   |          |          |         |   |          |          |         |   |          |          |         |   |          |          |         |   |          |          |         |   |          |          |         |   |          |          |          |                                                                                                                                                                                                                       |                                                                                                                                                                                                                                                                                                                                                                                                                                                                                                                                                                                                                                                                                                                                                                                                                                                                                                                                                                                                                                                                                                                                                                                                                                                                                                                                                                                                                                                                                                                                                                                                                                                                                                                                                                                                                                                                                                                                                                                                                                                                                                                                                                                                                                                                                                                                                                                                                                                                                                                                                                                                                                                                                                                                                                                                                                                                                                                                         |          |          |          |          |         |         |          |          |         |          |                                                                                                                                                                                                                         |                                                                                                                                                                                                                                                                                                                                                                                                                                                                                                                                                                                                                                                                                                                                                                                                                                                                                                                                                                                                                                                                                                                                                                                                                                                                                                                                                                                                                                                                                                                                                                                                                                                                                                                                                                                                                                                                                                                                                                                                                                                                                                                                                                                                                                                                                                                                                                                                                                                                                                                                                                                                                                                                                                                                                                                                                                                                                                                                                                                                                                                                                                                                                             |   |          |          |          |   |          |          |          |   |          |          |          |   |          |          |          |   |          |          |          |   |          |          |          |   |          |          |          |   |          |         |         |   |          |         |         |   |         |         |         |   |          |         |         |   |          |         |         |   |         |          |          |   |          |          |          |   |         |         |         |   |         |          |          |   |          |          |          |   |          |         |          |   |          |          |          |   |          |          |         |   |          |          |         |   |          |          |          |   |         |          |         |   |         |          |         |   |         |          |          |   |          |          |         |   |          |          |          |   |          |          |          |   |          |          |          |   |          |          |          |   |          |         |          |   |          |         |          |   |          |         |          |   |          |         |          |   |          |         |          |   |         |          |          |   |         |          |          |   |         |         |          |   |         |         |          |   |          |          |         |   |          |          |         |   |          |          |         |   |          |          |         |
| C                                                                                                                                                                                                                      | -0.18612                                                                                                                                                                                                                                                                                                                                                                                                                                                                                                                                                                                                                                                                                                                                                                                                                                                                                                                                                                                                                                                                                                                                                                                                                                                                                                                                                                                                                                                                                                                                                                                                                                                                                                                                                                                                                                                                                                                                                                                                                                                                                                                                                                                                                                                                                                                                                                                                                                                                                                                                                                                                                                                                                                                                                                                                                                                                                                                                                                                                                                                                                                                                                       | 2.57871  | -1.27705 |          |          |   |          |          |          |   |          |          |          |   |          |          |          |   |          |         |          |   |          |          |          |   |          |          |          |   |          |         |          |   |          |         |          |   |         |         |         |   |         |         |         |   |          |         |          |   |          |         |         |   |         |         |         |   |          |         |         |   |         |         |         |   |          |          |          |   |          |          |          |   |         |         |         |   |          |          |         |   |          |         |          |   |         |          |         |   |         |          |          |   |         |          |          |   |         |          |          |   |         |          |          |   |         |          |         |   |         |          |         |   |         |          |         |   |         |         |         |   |          |          |         |   |          |          |         |   |          |          |         |   |          |          |         |   |          |          |         |   |          |          |         |   |          |          |         |   |          |          |         |   |          |          |         |   |          |          |          |                                                                                                                                                                                                                       |                                                                                                                                                                                                                                                                                                                                                                                                                                                                                                                                                                                                                                                                                                                                                                                                                                                                                                                                                                                                                                                                                                                                                                                                                                                                                                                                                                                                                                                                                                                                                                                                                                                                                                                                                                                                                                                                                                                                                                                                                                                                                                                                                                                                                                                                                                                                                                                                                                                                                                                                                                                                                                                                                                                                                                                                                                                                                                                                         |          |          |          |          |         |         |          |          |         |          |                                                                                                                                                                                                                         |                                                                                                                                                                                                                                                                                                                                                                                                                                                                                                                                                                                                                                                                                                                                                                                                                                                                                                                                                                                                                                                                                                                                                                                                                                                                                                                                                                                                                                                                                                                                                                                                                                                                                                                                                                                                                                                                                                                                                                                                                                                                                                                                                                                                                                                                                                                                                                                                                                                                                                                                                                                                                                                                                                                                                                                                                                                                                                                                                                                                                                                                                                                                                             |   |          |          |          |   |          |          |          |   |          |          |          |   |          |          |          |   |          |          |          |   |          |          |          |   |          |          |          |   |          |         |         |   |          |         |         |   |         |         |         |   |          |         |         |   |          |         |         |   |         |          |          |   |          |          |          |   |         |         |         |   |         |          |          |   |          |          |          |   |          |         |          |   |          |          |          |   |          |          |         |   |          |          |         |   |          |          |          |   |         |          |         |   |         |          |         |   |         |          |          |   |          |          |         |   |          |          |          |   |          |          |          |   |          |          |          |   |          |          |          |   |          |         |          |   |          |         |          |   |          |         |          |   |          |         |          |   |          |         |          |   |         |          |          |   |         |          |          |   |         |         |          |   |         |         |          |   |          |          |         |   |          |          |         |   |          |          |         |   |          |          |         |
| C                                                                                                                                                                                                                      | -1.12203                                                                                                                                                                                                                                                                                                                                                                                                                                                                                                                                                                                                                                                                                                                                                                                                                                                                                                                                                                                                                                                                                                                                                                                                                                                                                                                                                                                                                                                                                                                                                                                                                                                                                                                                                                                                                                                                                                                                                                                                                                                                                                                                                                                                                                                                                                                                                                                                                                                                                                                                                                                                                                                                                                                                                                                                                                                                                                                                                                                                                                                                                                                                                       | -3.09821 | 1.80435  |          |          |   |          |          |          |   |          |          |          |   |          |          |          |   |          |         |          |   |          |          |          |   |          |          |          |   |          |         |          |   |          |         |          |   |         |         |         |   |         |         |         |   |          |         |          |   |          |         |         |   |         |         |         |   |          |         |         |   |         |         |         |   |          |          |          |   |          |          |          |   |         |         |         |   |          |          |         |   |          |         |          |   |         |          |         |   |         |          |          |   |         |          |          |   |         |          |          |   |         |          |          |   |         |          |         |   |         |          |         |   |         |          |         |   |         |         |         |   |          |          |         |   |          |          |         |   |          |          |         |   |          |          |         |   |          |          |         |   |          |          |         |   |          |          |         |   |          |          |         |   |          |          |         |   |          |          |          |                                                                                                                                                                                                                       |                                                                                                                                                                                                                                                                                                                                                                                                                                                                                                                                                                                                                                                                                                                                                                                                                                                                                                                                                                                                                                                                                                                                                                                                                                                                                                                                                                                                                                                                                                                                                                                                                                                                                                                                                                                                                                                                                                                                                                                                                                                                                                                                                                                                                                                                                                                                                                                                                                                                                                                                                                                                                                                                                                                                                                                                                                                                                                                                         |          |          |          |          |         |         |          |          |         |          |                                                                                                                                                                                                                         |                                                                                                                                                                                                                                                                                                                                                                                                                                                                                                                                                                                                                                                                                                                                                                                                                                                                                                                                                                                                                                                                                                                                                                                                                                                                                                                                                                                                                                                                                                                                                                                                                                                                                                                                                                                                                                                                                                                                                                                                                                                                                                                                                                                                                                                                                                                                                                                                                                                                                                                                                                                                                                                                                                                                                                                                                                                                                                                                                                                                                                                                                                                                                             |   |          |          |          |   |          |          |          |   |          |          |          |   |          |          |          |   |          |          |          |   |          |          |          |   |          |          |          |   |          |         |         |   |          |         |         |   |         |         |         |   |          |         |         |   |          |         |         |   |         |          |          |   |          |          |          |   |         |         |         |   |         |          |          |   |          |          |          |   |          |         |          |   |          |          |          |   |          |          |         |   |          |          |         |   |          |          |          |   |         |          |         |   |         |          |         |   |         |          |          |   |          |          |         |   |          |          |          |   |          |          |          |   |          |          |          |   |          |          |          |   |          |         |          |   |          |         |          |   |          |         |          |   |          |         |          |   |          |         |          |   |         |          |          |   |         |          |          |   |         |         |          |   |         |         |          |   |          |          |         |   |          |          |         |   |          |          |         |   |          |          |         |
| H                                                                                                                                                                                                                      | -0.99507                                                                                                                                                                                                                                                                                                                                                                                                                                                                                                                                                                                                                                                                                                                                                                                                                                                                                                                                                                                                                                                                                                                                                                                                                                                                                                                                                                                                                                                                                                                                                                                                                                                                                                                                                                                                                                                                                                                                                                                                                                                                                                                                                                                                                                                                                                                                                                                                                                                                                                                                                                                                                                                                                                                                                                                                                                                                                                                                                                                                                                                                                                                                                       | -3.49877 | 2.81323  |          |          |   |          |          |          |   |          |          |          |   |          |          |          |   |          |         |          |   |          |          |          |   |          |          |          |   |          |         |          |   |          |         |          |   |         |         |         |   |         |         |         |   |          |         |          |   |          |         |         |   |         |         |         |   |          |         |         |   |         |         |         |   |          |          |          |   |          |          |          |   |         |         |         |   |          |          |         |   |          |         |          |   |         |          |         |   |         |          |          |   |         |          |          |   |         |          |          |   |         |          |          |   |         |          |         |   |         |          |         |   |         |          |         |   |         |         |         |   |          |          |         |   |          |          |         |   |          |          |         |   |          |          |         |   |          |          |         |   |          |          |         |   |          |          |         |   |          |          |         |   |          |          |         |   |          |          |          |                                                                                                                                                                                                                       |                                                                                                                                                                                                                                                                                                                                                                                                                                                                                                                                                                                                                                                                                                                                                                                                                                                                                                                                                                                                                                                                                                                                                                                                                                                                                                                                                                                                                                                                                                                                                                                                                                                                                                                                                                                                                                                                                                                                                                                                                                                                                                                                                                                                                                                                                                                                                                                                                                                                                                                                                                                                                                                                                                                                                                                                                                                                                                                                         |          |          |          |          |         |         |          |          |         |          |                                                                                                                                                                                                                         |                                                                                                                                                                                                                                                                                                                                                                                                                                                                                                                                                                                                                                                                                                                                                                                                                                                                                                                                                                                                                                                                                                                                                                                                                                                                                                                                                                                                                                                                                                                                                                                                                                                                                                                                                                                                                                                                                                                                                                                                                                                                                                                                                                                                                                                                                                                                                                                                                                                                                                                                                                                                                                                                                                                                                                                                                                                                                                                                                                                                                                                                                                                                                             |   |          |          |          |   |          |          |          |   |          |          |          |   |          |          |          |   |          |          |          |   |          |          |          |   |          |          |          |   |          |         |         |   |          |         |         |   |         |         |         |   |          |         |         |   |          |         |         |   |         |          |          |   |          |          |          |   |         |         |         |   |         |          |          |   |          |          |          |   |          |         |          |   |          |          |          |   |          |          |         |   |          |          |         |   |          |          |          |   |         |          |         |   |         |          |         |   |         |          |          |   |          |          |         |   |          |          |          |   |          |          |          |   |          |          |          |   |          |          |          |   |          |         |          |   |          |         |          |   |          |         |          |   |          |         |          |   |          |         |          |   |         |          |          |   |         |          |          |   |         |         |          |   |         |         |          |   |          |          |         |   |          |          |         |   |          |          |         |   |          |          |         |
| H                                                                                                                                                                                                                      | -1.51395                                                                                                                                                                                                                                                                                                                                                                                                                                                                                                                                                                                                                                                                                                                                                                                                                                                                                                                                                                                                                                                                                                                                                                                                                                                                                                                                                                                                                                                                                                                                                                                                                                                                                                                                                                                                                                                                                                                                                                                                                                                                                                                                                                                                                                                                                                                                                                                                                                                                                                                                                                                                                                                                                                                                                                                                                                                                                                                                                                                                                                                                                                                                                       | -3.89524 | 1.16796  |          |          |   |          |          |          |   |          |          |          |   |          |          |          |   |          |         |          |   |          |          |          |   |          |          |          |   |          |         |          |   |          |         |          |   |         |         |         |   |         |         |         |   |          |         |          |   |          |         |         |   |         |         |         |   |          |         |         |   |         |         |         |   |          |          |          |   |          |          |          |   |         |         |         |   |          |          |         |   |          |         |          |   |         |          |         |   |         |          |          |   |         |          |          |   |         |          |          |   |         |          |          |   |         |          |         |   |         |          |         |   |         |          |         |   |         |         |         |   |          |          |         |   |          |          |         |   |          |          |         |   |          |          |         |   |          |          |         |   |          |          |         |   |          |          |         |   |          |          |         |   |          |          |         |   |          |          |          |                                                                                                                                                                                                                       |                                                                                                                                                                                                                                                                                                                                                                                                                                                                                                                                                                                                                                                                                                                                                                                                                                                                                                                                                                                                                                                                                                                                                                                                                                                                                                                                                                                                                                                                                                                                                                                                                                                                                                                                                                                                                                                                                                                                                                                                                                                                                                                                                                                                                                                                                                                                                                                                                                                                                                                                                                                                                                                                                                                                                                                                                                                                                                                                         |          |          |          |          |         |         |          |          |         |          |                                                                                                                                                                                                                         |                                                                                                                                                                                                                                                                                                                                                                                                                                                                                                                                                                                                                                                                                                                                                                                                                                                                                                                                                                                                                                                                                                                                                                                                                                                                                                                                                                                                                                                                                                                                                                                                                                                                                                                                                                                                                                                                                                                                                                                                                                                                                                                                                                                                                                                                                                                                                                                                                                                                                                                                                                                                                                                                                                                                                                                                                                                                                                                                                                                                                                                                                                                                                             |   |          |          |          |   |          |          |          |   |          |          |          |   |          |          |          |   |          |          |          |   |          |          |          |   |          |          |          |   |          |         |         |   |          |         |         |   |         |         |         |   |          |         |         |   |          |         |         |   |         |          |          |   |          |          |          |   |         |         |         |   |         |          |          |   |          |          |          |   |          |         |          |   |          |          |          |   |          |          |         |   |          |          |         |   |          |          |          |   |         |          |         |   |         |          |         |   |         |          |          |   |          |          |         |   |          |          |          |   |          |          |          |   |          |          |          |   |          |          |          |   |          |         |          |   |          |         |          |   |          |         |          |   |          |         |          |   |          |         |          |   |         |          |          |   |         |          |          |   |         |         |          |   |         |         |          |   |          |          |         |   |          |          |         |   |          |          |         |   |          |          |         |
| H                                                                                                                                                                                                                      | -1.87130                                                                                                                                                                                                                                                                                                                                                                                                                                                                                                                                                                                                                                                                                                                                                                                                                                                                                                                                                                                                                                                                                                                                                                                                                                                                                                                                                                                                                                                                                                                                                                                                                                                                                                                                                                                                                                                                                                                                                                                                                                                                                                                                                                                                                                                                                                                                                                                                                                                                                                                                                                                                                                                                                                                                                                                                                                                                                                                                                                                                                                                                                                                                                       | -2.30508 | 1.83521  |          |          |   |          |          |          |   |          |          |          |   |          |          |          |   |          |         |          |   |          |          |          |   |          |          |          |   |          |         |          |   |          |         |          |   |         |         |         |   |         |         |         |   |          |         |          |   |          |         |         |   |         |         |         |   |          |         |         |   |         |         |         |   |          |          |          |   |          |          |          |   |         |         |         |   |          |          |         |   |          |         |          |   |         |          |         |   |         |          |          |   |         |          |          |   |         |          |          |   |         |          |          |   |         |          |         |   |         |          |         |   |         |          |         |   |         |         |         |   |          |          |         |   |          |          |         |   |          |          |         |   |          |          |         |   |          |          |         |   |          |          |         |   |          |          |         |   |          |          |         |   |          |          |         |   |          |          |          |                                                                                                                                                                                                                       |                                                                                                                                                                                                                                                                                                                                                                                                                                                                                                                                                                                                                                                                                                                                                                                                                                                                                                                                                                                                                                                                                                                                                                                                                                                                                                                                                                                                                                                                                                                                                                                                                                                                                                                                                                                                                                                                                                                                                                                                                                                                                                                                                                                                                                                                                                                                                                                                                                                                                                                                                                                                                                                                                                                                                                                                                                                                                                                                         |          |          |          |          |         |         |          |          |         |          |                                                                                                                                                                                                                         |                                                                                                                                                                                                                                                                                                                                                                                                                                                                                                                                                                                                                                                                                                                                                                                                                                                                                                                                                                                                                                                                                                                                                                                                                                                                                                                                                                                                                                                                                                                                                                                                                                                                                                                                                                                                                                                                                                                                                                                                                                                                                                                                                                                                                                                                                                                                                                                                                                                                                                                                                                                                                                                                                                                                                                                                                                                                                                                                                                                                                                                                                                                                                             |   |          |          |          |   |          |          |          |   |          |          |          |   |          |          |          |   |          |          |          |   |          |          |          |   |          |          |          |   |          |         |         |   |          |         |         |   |         |         |         |   |          |         |         |   |          |         |         |   |         |          |          |   |          |          |          |   |         |         |         |   |         |          |          |   |          |          |          |   |          |         |          |   |          |          |          |   |          |          |         |   |          |          |         |   |          |          |          |   |         |          |         |   |         |          |         |   |         |          |          |   |          |          |         |   |          |          |          |   |          |          |          |   |          |          |          |   |          |          |          |   |          |         |          |   |          |         |          |   |          |         |          |   |          |         |          |   |          |         |          |   |         |          |          |   |         |          |          |   |         |         |          |   |         |         |          |   |          |          |         |   |          |          |         |   |          |          |         |   |          |          |         |
| C                                                                                                                                                                                                                      | 1.23597                                                                                                                                                                                                                                                                                                                                                                                                                                                                                                                                                                                                                                                                                                                                                                                                                                                                                                                                                                                                                                                                                                                                                                                                                                                                                                                                                                                                                                                                                                                                                                                                                                                                                                                                                                                                                                                                                                                                                                                                                                                                                                                                                                                                                                                                                                                                                                                                                                                                                                                                                                                                                                                                                                                                                                                                                                                                                                                                                                                                                                                                                                                                                        | -3.76647 | 1.26073  |          |          |   |          |          |          |   |          |          |          |   |          |          |          |   |          |         |          |   |          |          |          |   |          |          |          |   |          |         |          |   |          |         |          |   |         |         |         |   |         |         |         |   |          |         |          |   |          |         |         |   |         |         |         |   |          |         |         |   |         |         |         |   |          |          |          |   |          |          |          |   |         |         |         |   |          |          |         |   |          |         |          |   |         |          |         |   |         |          |          |   |         |          |          |   |         |          |          |   |         |          |          |   |         |          |         |   |         |          |         |   |         |          |         |   |         |         |         |   |          |          |         |   |          |          |         |   |          |          |         |   |          |          |         |   |          |          |         |   |          |          |         |   |          |          |         |   |          |          |         |   |          |          |         |   |          |          |          |                                                                                                                                                                                                                       |                                                                                                                                                                                                                                                                                                                                                                                                                                                                                                                                                                                                                                                                                                                                                                                                                                                                                                                                                                                                                                                                                                                                                                                                                                                                                                                                                                                                                                                                                                                                                                                                                                                                                                                                                                                                                                                                                                                                                                                                                                                                                                                                                                                                                                                                                                                                                                                                                                                                                                                                                                                                                                                                                                                                                                                                                                                                                                                                         |          |          |          |          |         |         |          |          |         |          |                                                                                                                                                                                                                         |                                                                                                                                                                                                                                                                                                                                                                                                                                                                                                                                                                                                                                                                                                                                                                                                                                                                                                                                                                                                                                                                                                                                                                                                                                                                                                                                                                                                                                                                                                                                                                                                                                                                                                                                                                                                                                                                                                                                                                                                                                                                                                                                                                                                                                                                                                                                                                                                                                                                                                                                                                                                                                                                                                                                                                                                                                                                                                                                                                                                                                                                                                                                                             |   |          |          |          |   |          |          |          |   |          |          |          |   |          |          |          |   |          |          |          |   |          |          |          |   |          |          |          |   |          |         |         |   |          |         |         |   |         |         |         |   |          |         |         |   |          |         |         |   |         |          |          |   |          |          |          |   |         |         |         |   |         |          |          |   |          |          |          |   |          |         |          |   |          |          |          |   |          |          |         |   |          |          |         |   |          |          |          |   |         |          |         |   |         |          |         |   |         |          |          |   |          |          |         |   |          |          |          |   |          |          |          |   |          |          |          |   |          |          |          |   |          |         |          |   |          |         |          |   |          |         |          |   |          |         |          |   |          |         |          |   |         |          |          |   |         |          |          |   |         |         |          |   |         |         |          |   |          |          |         |   |          |          |         |   |          |          |         |   |          |          |         |
| H                                                                                                                                                                                                                      | 2.17327                                                                                                                                                                                                                                                                                                                                                                                                                                                                                                                                                                                                                                                                                                                                                                                                                                                                                                                                                                                                                                                                                                                                                                                                                                                                                                                                                                                                                                                                                                                                                                                                                                                                                                                                                                                                                                                                                                                                                                                                                                                                                                                                                                                                                                                                                                                                                                                                                                                                                                                                                                                                                                                                                                                                                                                                                                                                                                                                                                                                                                                                                                                                                        | -3.47363 | 0.78507  |          |          |   |          |          |          |   |          |          |          |   |          |          |          |   |          |         |          |   |          |          |          |   |          |          |          |   |          |         |          |   |          |         |          |   |         |         |         |   |         |         |         |   |          |         |          |   |          |         |         |   |         |         |         |   |          |         |         |   |         |         |         |   |          |          |          |   |          |          |          |   |         |         |         |   |          |          |         |   |          |         |          |   |         |          |         |   |         |          |          |   |         |          |          |   |         |          |          |   |         |          |          |   |         |          |         |   |         |          |         |   |         |          |         |   |         |         |         |   |          |          |         |   |          |          |         |   |          |          |         |   |          |          |         |   |          |          |         |   |          |          |         |   |          |          |         |   |          |          |         |   |          |          |         |   |          |          |          |                                                                                                                                                                                                                       |                                                                                                                                                                                                                                                                                                                                                                                                                                                                                                                                                                                                                                                                                                                                                                                                                                                                                                                                                                                                                                                                                                                                                                                                                                                                                                                                                                                                                                                                                                                                                                                                                                                                                                                                                                                                                                                                                                                                                                                                                                                                                                                                                                                                                                                                                                                                                                                                                                                                                                                                                                                                                                                                                                                                                                                                                                                                                                                                         |          |          |          |          |         |         |          |          |         |          |                                                                                                                                                                                                                         |                                                                                                                                                                                                                                                                                                                                                                                                                                                                                                                                                                                                                                                                                                                                                                                                                                                                                                                                                                                                                                                                                                                                                                                                                                                                                                                                                                                                                                                                                                                                                                                                                                                                                                                                                                                                                                                                                                                                                                                                                                                                                                                                                                                                                                                                                                                                                                                                                                                                                                                                                                                                                                                                                                                                                                                                                                                                                                                                                                                                                                                                                                                                                             |   |          |          |          |   |          |          |          |   |          |          |          |   |          |          |          |   |          |          |          |   |          |          |          |   |          |          |          |   |          |         |         |   |          |         |         |   |         |         |         |   |          |         |         |   |          |         |         |   |         |          |          |   |          |          |          |   |         |         |         |   |         |          |          |   |          |          |          |   |          |         |          |   |          |          |          |   |          |          |         |   |          |          |         |   |          |          |          |   |         |          |         |   |         |          |         |   |         |          |          |   |          |          |         |   |          |          |          |   |          |          |          |   |          |          |          |   |          |          |          |   |          |         |          |   |          |         |          |   |          |         |          |   |          |         |          |   |          |         |          |   |         |          |          |   |         |          |          |   |         |         |          |   |         |         |          |   |          |          |         |   |          |          |         |   |          |          |         |   |          |          |         |
| H                                                                                                                                                                                                                      | 0.86150                                                                                                                                                                                                                                                                                                                                                                                                                                                                                                                                                                                                                                                                                                                                                                                                                                                                                                                                                                                                                                                                                                                                                                                                                                                                                                                                                                                                                                                                                                                                                                                                                                                                                                                                                                                                                                                                                                                                                                                                                                                                                                                                                                                                                                                                                                                                                                                                                                                                                                                                                                                                                                                                                                                                                                                                                                                                                                                                                                                                                                                                                                                                                        | -4.65946 | 0.75847  |          |          |   |          |          |          |   |          |          |          |   |          |          |          |   |          |         |          |   |          |          |          |   |          |          |          |   |          |         |          |   |          |         |          |   |         |         |         |   |         |         |         |   |          |         |          |   |          |         |         |   |         |         |         |   |          |         |         |   |         |         |         |   |          |          |          |   |          |          |          |   |         |         |         |   |          |          |         |   |          |         |          |   |         |          |         |   |         |          |          |   |         |          |          |   |         |          |          |   |         |          |          |   |         |          |         |   |         |          |         |   |         |          |         |   |         |         |         |   |          |          |         |   |          |          |         |   |          |          |         |   |          |          |         |   |          |          |         |   |          |          |         |   |          |          |         |   |          |          |         |   |          |          |         |   |          |          |          |                                                                                                                                                                                                                       |                                                                                                                                                                                                                                                                                                                                                                                                                                                                                                                                                                                                                                                                                                                                                                                                                                                                                                                                                                                                                                                                                                                                                                                                                                                                                                                                                                                                                                                                                                                                                                                                                                                                                                                                                                                                                                                                                                                                                                                                                                                                                                                                                                                                                                                                                                                                                                                                                                                                                                                                                                                                                                                                                                                                                                                                                                                                                                                                         |          |          |          |          |         |         |          |          |         |          |                                                                                                                                                                                                                         |                                                                                                                                                                                                                                                                                                                                                                                                                                                                                                                                                                                                                                                                                                                                                                                                                                                                                                                                                                                                                                                                                                                                                                                                                                                                                                                                                                                                                                                                                                                                                                                                                                                                                                                                                                                                                                                                                                                                                                                                                                                                                                                                                                                                                                                                                                                                                                                                                                                                                                                                                                                                                                                                                                                                                                                                                                                                                                                                                                                                                                                                                                                                                             |   |          |          |          |   |          |          |          |   |          |          |          |   |          |          |          |   |          |          |          |   |          |          |          |   |          |          |          |   |          |         |         |   |          |         |         |   |         |         |         |   |          |         |         |   |          |         |         |   |         |          |          |   |          |          |          |   |         |         |         |   |         |          |          |   |          |          |          |   |          |         |          |   |          |          |          |   |          |          |         |   |          |          |         |   |          |          |          |   |         |          |         |   |         |          |         |   |         |          |          |   |          |          |         |   |          |          |          |   |          |          |          |   |          |          |          |   |          |          |          |   |          |         |          |   |          |         |          |   |          |         |          |   |          |         |          |   |          |         |          |   |         |          |          |   |         |          |          |   |         |         |          |   |         |         |          |   |          |          |         |   |          |          |         |   |          |          |         |   |          |          |         |
| H                                                                                                                                                                                                                      | 1.44226                                                                                                                                                                                                                                                                                                                                                                                                                                                                                                                                                                                                                                                                                                                                                                                                                                                                                                                                                                                                                                                                                                                                                                                                                                                                                                                                                                                                                                                                                                                                                                                                                                                                                                                                                                                                                                                                                                                                                                                                                                                                                                                                                                                                                                                                                                                                                                                                                                                                                                                                                                                                                                                                                                                                                                                                                                                                                                                                                                                                                                                                                                                                                        | -4.03681 | 2.29898  |          |          |   |          |          |          |   |          |          |          |   |          |          |          |   |          |         |          |   |          |          |          |   |          |          |          |   |          |         |          |   |          |         |          |   |         |         |         |   |         |         |         |   |          |         |          |   |          |         |         |   |         |         |         |   |          |         |         |   |         |         |         |   |          |          |          |   |          |          |          |   |         |         |         |   |          |          |         |   |          |         |          |   |         |          |         |   |         |          |          |   |         |          |          |   |         |          |          |   |         |          |          |   |         |          |         |   |         |          |         |   |         |          |         |   |         |         |         |   |          |          |         |   |          |          |         |   |          |          |         |   |          |          |         |   |          |          |         |   |          |          |         |   |          |          |         |   |          |          |         |   |          |          |         |   |          |          |          |                                                                                                                                                                                                                       |                                                                                                                                                                                                                                                                                                                                                                                                                                                                                                                                                                                                                                                                                                                                                                                                                                                                                                                                                                                                                                                                                                                                                                                                                                                                                                                                                                                                                                                                                                                                                                                                                                                                                                                                                                                                                                                                                                                                                                                                                                                                                                                                                                                                                                                                                                                                                                                                                                                                                                                                                                                                                                                                                                                                                                                                                                                                                                                                         |          |          |          |          |         |         |          |          |         |          |                                                                                                                                                                                                                         |                                                                                                                                                                                                                                                                                                                                                                                                                                                                                                                                                                                                                                                                                                                                                                                                                                                                                                                                                                                                                                                                                                                                                                                                                                                                                                                                                                                                                                                                                                                                                                                                                                                                                                                                                                                                                                                                                                                                                                                                                                                                                                                                                                                                                                                                                                                                                                                                                                                                                                                                                                                                                                                                                                                                                                                                                                                                                                                                                                                                                                                                                                                                                             |   |          |          |          |   |          |          |          |   |          |          |          |   |          |          |          |   |          |          |          |   |          |          |          |   |          |          |          |   |          |         |         |   |          |         |         |   |         |         |         |   |          |         |         |   |          |         |         |   |         |          |          |   |          |          |          |   |         |         |         |   |         |          |          |   |          |          |          |   |          |         |          |   |          |          |          |   |          |          |         |   |          |          |         |   |          |          |          |   |         |          |         |   |         |          |         |   |         |          |          |   |          |          |         |   |          |          |          |   |          |          |          |   |          |          |          |   |          |          |          |   |          |         |          |   |          |         |          |   |          |         |          |   |          |         |          |   |          |         |          |   |         |          |          |   |         |          |          |   |         |         |          |   |         |         |          |   |          |          |         |   |          |          |         |   |          |          |         |   |          |          |         |
| H                                                                                                                                                                                                                      | -0.61384                                                                                                                                                                                                                                                                                                                                                                                                                                                                                                                                                                                                                                                                                                                                                                                                                                                                                                                                                                                                                                                                                                                                                                                                                                                                                                                                                                                                                                                                                                                                                                                                                                                                                                                                                                                                                                                                                                                                                                                                                                                                                                                                                                                                                                                                                                                                                                                                                                                                                                                                                                                                                                                                                                                                                                                                                                                                                                                                                                                                                                                                                                                                                       | 1.83821  | -1.94366 |          |          |   |          |          |          |   |          |          |          |   |          |          |          |   |          |         |          |   |          |          |          |   |          |          |          |   |          |         |          |   |          |         |          |   |         |         |         |   |         |         |         |   |          |         |          |   |          |         |         |   |         |         |         |   |          |         |         |   |         |         |         |   |          |          |          |   |          |          |          |   |         |         |         |   |          |          |         |   |          |         |          |   |         |          |         |   |         |          |          |   |         |          |          |   |         |          |          |   |         |          |          |   |         |          |         |   |         |          |         |   |         |          |         |   |         |         |         |   |          |          |         |   |          |          |         |   |          |          |         |   |          |          |         |   |          |          |         |   |          |          |         |   |          |          |         |   |          |          |         |   |          |          |         |   |          |          |          |                                                                                                                                                                                                                       |                                                                                                                                                                                                                                                                                                                                                                                                                                                                                                                                                                                                                                                                                                                                                                                                                                                                                                                                                                                                                                                                                                                                                                                                                                                                                                                                                                                                                                                                                                                                                                                                                                                                                                                                                                                                                                                                                                                                                                                                                                                                                                                                                                                                                                                                                                                                                                                                                                                                                                                                                                                                                                                                                                                                                                                                                                                                                                                                         |          |          |          |          |         |         |          |          |         |          |                                                                                                                                                                                                                         |                                                                                                                                                                                                                                                                                                                                                                                                                                                                                                                                                                                                                                                                                                                                                                                                                                                                                                                                                                                                                                                                                                                                                                                                                                                                                                                                                                                                                                                                                                                                                                                                                                                                                                                                                                                                                                                                                                                                                                                                                                                                                                                                                                                                                                                                                                                                                                                                                                                                                                                                                                                                                                                                                                                                                                                                                                                                                                                                                                                                                                                                                                                                                             |   |          |          |          |   |          |          |          |   |          |          |          |   |          |          |          |   |          |          |          |   |          |          |          |   |          |          |          |   |          |         |         |   |          |         |         |   |         |         |         |   |          |         |         |   |          |         |         |   |         |          |          |   |          |          |          |   |         |         |         |   |         |          |          |   |          |          |          |   |          |         |          |   |          |          |          |   |          |          |         |   |          |          |         |   |          |          |          |   |         |          |         |   |         |          |         |   |         |          |          |   |          |          |         |   |          |          |          |   |          |          |          |   |          |          |          |   |          |          |          |   |          |         |          |   |          |         |          |   |          |         |          |   |          |         |          |   |          |         |          |   |         |          |          |   |         |          |          |   |         |         |          |   |         |         |          |   |          |          |         |   |          |          |         |   |          |          |         |   |          |          |         |
| C                                                                                                                                                                                                                      | -1.20249                                                                                                                                                                                                                                                                                                                                                                                                                                                                                                                                                                                                                                                                                                                                                                                                                                                                                                                                                                                                                                                                                                                                                                                                                                                                                                                                                                                                                                                                                                                                                                                                                                                                                                                                                                                                                                                                                                                                                                                                                                                                                                                                                                                                                                                                                                                                                                                                                                                                                                                                                                                                                                                                                                                                                                                                                                                                                                                                                                                                                                                                                                                                                       | 3.73539  | -1.29667 |          |          |   |          |          |          |   |          |          |          |   |          |          |          |   |          |         |          |   |          |          |          |   |          |          |          |   |          |         |          |   |          |         |          |   |         |         |         |   |         |         |         |   |          |         |          |   |          |         |         |   |         |         |         |   |          |         |         |   |         |         |         |   |          |          |          |   |          |          |          |   |         |         |         |   |          |          |         |   |          |         |          |   |         |          |         |   |         |          |          |   |         |          |          |   |         |          |          |   |         |          |          |   |         |          |         |   |         |          |         |   |         |          |         |   |         |         |         |   |          |          |         |   |          |          |         |   |          |          |         |   |          |          |         |   |          |          |         |   |          |          |         |   |          |          |         |   |          |          |         |   |          |          |         |   |          |          |          |                                                                                                                                                                                                                       |                                                                                                                                                                                                                                                                                                                                                                                                                                                                                                                                                                                                                                                                                                                                                                                                                                                                                                                                                                                                                                                                                                                                                                                                                                                                                                                                                                                                                                                                                                                                                                                                                                                                                                                                                                                                                                                                                                                                                                                                                                                                                                                                                                                                                                                                                                                                                                                                                                                                                                                                                                                                                                                                                                                                                                                                                                                                                                                                         |          |          |          |          |         |         |          |          |         |          |                                                                                                                                                                                                                         |                                                                                                                                                                                                                                                                                                                                                                                                                                                                                                                                                                                                                                                                                                                                                                                                                                                                                                                                                                                                                                                                                                                                                                                                                                                                                                                                                                                                                                                                                                                                                                                                                                                                                                                                                                                                                                                                                                                                                                                                                                                                                                                                                                                                                                                                                                                                                                                                                                                                                                                                                                                                                                                                                                                                                                                                                                                                                                                                                                                                                                                                                                                                                             |   |          |          |          |   |          |          |          |   |          |          |          |   |          |          |          |   |          |          |          |   |          |          |          |   |          |          |          |   |          |         |         |   |          |         |         |   |         |         |         |   |          |         |         |   |          |         |         |   |         |          |          |   |          |          |          |   |         |         |         |   |         |          |          |   |          |          |          |   |          |         |          |   |          |          |          |   |          |          |         |   |          |          |         |   |          |          |          |   |         |          |         |   |         |          |         |   |         |          |          |   |          |          |         |   |          |          |          |   |          |          |          |   |          |          |          |   |          |          |          |   |          |         |          |   |          |         |          |   |          |         |          |   |          |         |          |   |          |         |          |   |         |          |          |   |         |          |          |   |         |         |          |   |         |         |          |   |          |          |         |   |          |          |         |   |          |          |         |   |          |          |         |
| H                                                                                                                                                                                                                      | -0.83063                                                                                                                                                                                                                                                                                                                                                                                                                                                                                                                                                                                                                                                                                                                                                                                                                                                                                                                                                                                                                                                                                                                                                                                                                                                                                                                                                                                                                                                                                                                                                                                                                                                                                                                                                                                                                                                                                                                                                                                                                                                                                                                                                                                                                                                                                                                                                                                                                                                                                                                                                                                                                                                                                                                                                                                                                                                                                                                                                                                                                                                                                                                                                       | 4.62707  | -0.79018 |          |          |   |          |          |          |   |          |          |          |   |          |          |          |   |          |         |          |   |          |          |          |   |          |          |          |   |          |         |          |   |          |         |          |   |         |         |         |   |         |         |         |   |          |         |          |   |          |         |         |   |         |         |         |   |          |         |         |   |         |         |         |   |          |          |          |   |          |          |          |   |         |         |         |   |          |          |         |   |          |         |          |   |         |          |         |   |         |          |          |   |         |          |          |   |         |          |          |   |         |          |          |   |         |          |         |   |         |          |         |   |         |          |         |   |         |         |         |   |          |          |         |   |          |          |         |   |          |          |         |   |          |          |         |   |          |          |         |   |          |          |         |   |          |          |         |   |          |          |         |   |          |          |         |   |          |          |          |                                                                                                                                                                                                                       |                                                                                                                                                                                                                                                                                                                                                                                                                                                                                                                                                                                                                                                                                                                                                                                                                                                                                                                                                                                                                                                                                                                                                                                                                                                                                                                                                                                                                                                                                                                                                                                                                                                                                                                                                                                                                                                                                                                                                                                                                                                                                                                                                                                                                                                                                                                                                                                                                                                                                                                                                                                                                                                                                                                                                                                                                                                                                                                                         |          |          |          |          |         |         |          |          |         |          |                                                                                                                                                                                                                         |                                                                                                                                                                                                                                                                                                                                                                                                                                                                                                                                                                                                                                                                                                                                                                                                                                                                                                                                                                                                                                                                                                                                                                                                                                                                                                                                                                                                                                                                                                                                                                                                                                                                                                                                                                                                                                                                                                                                                                                                                                                                                                                                                                                                                                                                                                                                                                                                                                                                                                                                                                                                                                                                                                                                                                                                                                                                                                                                                                                                                                                                                                                                                             |   |          |          |          |   |          |          |          |   |          |          |          |   |          |          |          |   |          |          |          |   |          |          |          |   |          |          |          |   |          |         |         |   |          |         |         |   |         |         |         |   |          |         |         |   |          |         |         |   |         |          |          |   |          |          |          |   |         |         |         |   |         |          |          |   |          |          |          |   |          |         |          |   |          |          |          |   |          |          |         |   |          |          |         |   |          |          |          |   |         |          |         |   |         |          |         |   |         |          |          |   |          |          |         |   |          |          |          |   |          |          |          |   |          |          |          |   |          |          |          |   |          |         |          |   |          |         |          |   |          |         |          |   |          |         |          |   |          |         |          |   |         |          |          |   |         |          |          |   |         |         |          |   |         |         |          |   |          |          |         |   |          |          |         |   |          |          |         |   |          |          |         |
| H                                                                                                                                                                                                                      | -2.14114                                                                                                                                                                                                                                                                                                                                                                                                                                                                                                                                                                                                                                                                                                                                                                                                                                                                                                                                                                                                                                                                                                                                                                                                                                                                                                                                                                                                                                                                                                                                                                                                                                                                                                                                                                                                                                                                                                                                                                                                                                                                                                                                                                                                                                                                                                                                                                                                                                                                                                                                                                                                                                                                                                                                                                                                                                                                                                                                                                                                                                                                                                                                                       | 3.44008  | -0.82523 |          |          |   |          |          |          |   |          |          |          |   |          |          |          |   |          |         |          |   |          |          |          |   |          |          |          |   |          |         |          |   |          |         |          |   |         |         |         |   |         |         |         |   |          |         |          |   |          |         |         |   |         |         |         |   |          |         |         |   |         |         |         |   |          |          |          |   |          |          |          |   |         |         |         |   |          |          |         |   |          |         |          |   |         |          |         |   |         |          |          |   |         |          |          |   |         |          |          |   |         |          |          |   |         |          |         |   |         |          |         |   |         |          |         |   |         |         |         |   |          |          |         |   |          |          |         |   |          |          |         |   |          |          |         |   |          |          |         |   |          |          |         |   |          |          |         |   |          |          |         |   |          |          |         |   |          |          |          |                                                                                                                                                                                                                       |                                                                                                                                                                                                                                                                                                                                                                                                                                                                                                                                                                                                                                                                                                                                                                                                                                                                                                                                                                                                                                                                                                                                                                                                                                                                                                                                                                                                                                                                                                                                                                                                                                                                                                                                                                                                                                                                                                                                                                                                                                                                                                                                                                                                                                                                                                                                                                                                                                                                                                                                                                                                                                                                                                                                                                                                                                                                                                                                         |          |          |          |          |         |         |          |          |         |          |                                                                                                                                                                                                                         |                                                                                                                                                                                                                                                                                                                                                                                                                                                                                                                                                                                                                                                                                                                                                                                                                                                                                                                                                                                                                                                                                                                                                                                                                                                                                                                                                                                                                                                                                                                                                                                                                                                                                                                                                                                                                                                                                                                                                                                                                                                                                                                                                                                                                                                                                                                                                                                                                                                                                                                                                                                                                                                                                                                                                                                                                                                                                                                                                                                                                                                                                                                                                             |   |          |          |          |   |          |          |          |   |          |          |          |   |          |          |          |   |          |          |          |   |          |          |          |   |          |          |          |   |          |         |         |   |          |         |         |   |         |         |         |   |          |         |         |   |          |         |         |   |         |          |          |   |          |          |          |   |         |         |         |   |         |          |          |   |          |          |          |   |          |         |          |   |          |          |          |   |          |          |         |   |          |          |         |   |          |          |          |   |         |          |         |   |         |          |         |   |         |          |          |   |          |          |         |   |          |          |          |   |          |          |          |   |          |          |          |   |          |          |          |   |          |         |          |   |          |         |          |   |          |         |          |   |          |         |          |   |          |         |          |   |         |          |          |   |         |          |          |   |         |         |          |   |         |         |          |   |          |          |         |   |          |          |         |   |          |          |         |   |          |          |         |
| H                                                                                                                                                                                                                      | -1.40545                                                                                                                                                                                                                                                                                                                                                                                                                                                                                                                                                                                                                                                                                                                                                                                                                                                                                                                                                                                                                                                                                                                                                                                                                                                                                                                                                                                                                                                                                                                                                                                                                                                                                                                                                                                                                                                                                                                                                                                                                                                                                                                                                                                                                                                                                                                                                                                                                                                                                                                                                                                                                                                                                                                                                                                                                                                                                                                                                                                                                                                                                                                                                       | 4.00890  | -2.33477 |          |          |   |          |          |          |   |          |          |          |   |          |          |          |   |          |         |          |   |          |          |          |   |          |          |          |   |          |         |          |   |          |         |          |   |         |         |         |   |         |         |         |   |          |         |          |   |          |         |         |   |         |         |         |   |          |         |         |   |         |         |         |   |          |          |          |   |          |          |          |   |         |         |         |   |          |          |         |   |          |         |          |   |         |          |         |   |         |          |          |   |         |          |          |   |         |          |          |   |         |          |          |   |         |          |         |   |         |          |         |   |         |          |         |   |         |         |         |   |          |          |         |   |          |          |         |   |          |          |         |   |          |          |         |   |          |          |         |   |          |          |         |   |          |          |         |   |          |          |         |   |          |          |         |   |          |          |          |                                                                                                                                                                                                                       |                                                                                                                                                                                                                                                                                                                                                                                                                                                                                                                                                                                                                                                                                                                                                                                                                                                                                                                                                                                                                                                                                                                                                                                                                                                                                                                                                                                                                                                                                                                                                                                                                                                                                                                                                                                                                                                                                                                                                                                                                                                                                                                                                                                                                                                                                                                                                                                                                                                                                                                                                                                                                                                                                                                                                                                                                                                                                                                                         |          |          |          |          |         |         |          |          |         |          |                                                                                                                                                                                                                         |                                                                                                                                                                                                                                                                                                                                                                                                                                                                                                                                                                                                                                                                                                                                                                                                                                                                                                                                                                                                                                                                                                                                                                                                                                                                                                                                                                                                                                                                                                                                                                                                                                                                                                                                                                                                                                                                                                                                                                                                                                                                                                                                                                                                                                                                                                                                                                                                                                                                                                                                                                                                                                                                                                                                                                                                                                                                                                                                                                                                                                                                                                                                                             |   |          |          |          |   |          |          |          |   |          |          |          |   |          |          |          |   |          |          |          |   |          |          |          |   |          |          |          |   |          |         |         |   |          |         |         |   |         |         |         |   |          |         |         |   |          |         |         |   |         |          |          |   |          |          |          |   |         |         |         |   |         |          |          |   |          |          |          |   |          |         |          |   |          |          |          |   |          |          |         |   |          |          |         |   |          |          |          |   |         |          |         |   |         |          |         |   |         |          |          |   |          |          |         |   |          |          |          |   |          |          |          |   |          |          |          |   |          |          |          |   |          |         |          |   |          |         |          |   |          |         |          |   |          |         |          |   |          |         |          |   |         |          |          |   |         |          |          |   |         |         |          |   |         |         |          |   |          |          |         |   |          |          |         |   |          |          |         |   |          |          |         |
| C                                                                                                                                                                                                                      | 1.15653                                                                                                                                                                                                                                                                                                                                                                                                                                                                                                                                                                                                                                                                                                                                                                                                                                                                                                                                                                                                                                                                                                                                                                                                                                                                                                                                                                                                                                                                                                                                                                                                                                                                                                                                                                                                                                                                                                                                                                                                                                                                                                                                                                                                                                                                                                                                                                                                                                                                                                                                                                                                                                                                                                                                                                                                                                                                                                                                                                                                                                                                                                                                                        | 3.06861  | -1.83901 |          |          |   |          |          |          |   |          |          |          |   |          |          |          |   |          |         |          |   |          |          |          |   |          |          |          |   |          |         |          |   |          |         |          |   |         |         |         |   |         |         |         |   |          |         |          |   |          |         |         |   |         |         |         |   |          |         |         |   |         |         |         |   |          |          |          |   |          |          |          |   |         |         |         |   |          |          |         |   |          |         |          |   |         |          |         |   |         |          |          |   |         |          |          |   |         |          |          |   |         |          |          |   |         |          |         |   |         |          |         |   |         |          |         |   |         |         |         |   |          |          |         |   |          |          |         |   |          |          |         |   |          |          |         |   |          |          |         |   |          |          |         |   |          |          |         |   |          |          |         |   |          |          |         |   |          |          |          |                                                                                                                                                                                                                       |                                                                                                                                                                                                                                                                                                                                                                                                                                                                                                                                                                                                                                                                                                                                                                                                                                                                                                                                                                                                                                                                                                                                                                                                                                                                                                                                                                                                                                                                                                                                                                                                                                                                                                                                                                                                                                                                                                                                                                                                                                                                                                                                                                                                                                                                                                                                                                                                                                                                                                                                                                                                                                                                                                                                                                                                                                                                                                                                         |          |          |          |          |         |         |          |          |         |          |                                                                                                                                                                                                                         |                                                                                                                                                                                                                                                                                                                                                                                                                                                                                                                                                                                                                                                                                                                                                                                                                                                                                                                                                                                                                                                                                                                                                                                                                                                                                                                                                                                                                                                                                                                                                                                                                                                                                                                                                                                                                                                                                                                                                                                                                                                                                                                                                                                                                                                                                                                                                                                                                                                                                                                                                                                                                                                                                                                                                                                                                                                                                                                                                                                                                                                                                                                                                             |   |          |          |          |   |          |          |          |   |          |          |          |   |          |          |          |   |          |          |          |   |          |          |          |   |          |          |          |   |          |         |         |   |          |         |         |   |         |         |         |   |          |         |         |   |          |         |         |   |         |          |          |   |          |          |          |   |         |         |         |   |         |          |          |   |          |          |          |   |          |         |          |   |          |          |          |   |          |          |         |   |          |          |         |   |          |          |          |   |         |          |         |   |         |          |         |   |         |          |          |   |          |          |         |   |          |          |          |   |          |          |          |   |          |          |          |   |          |          |          |   |          |         |          |   |          |         |          |   |          |         |          |   |          |         |          |   |          |         |          |   |         |          |          |   |         |          |          |   |         |         |          |   |         |         |          |   |          |          |         |   |          |          |         |   |          |          |         |   |          |          |         |
| H                                                                                                                                                                                                                      | 1.54715                                                                                                                                                                                                                                                                                                                                                                                                                                                                                                                                                                                                                                                                                                                                                                                                                                                                                                                                                                                                                                                                                                                                                                                                                                                                                                                                                                                                                                                                                                                                                                                                                                                                                                                                                                                                                                                                                                                                                                                                                                                                                                                                                                                                                                                                                                                                                                                                                                                                                                                                                                                                                                                                                                                                                                                                                                                                                                                                                                                                                                                                                                                                                        | 3.86603  | -1.20229 |          |          |   |          |          |          |   |          |          |          |   |          |          |          |   |          |         |          |   |          |          |          |   |          |          |          |   |          |         |          |   |          |         |          |   |         |         |         |   |         |         |         |   |          |         |          |   |          |         |         |   |         |         |         |   |          |         |         |   |         |         |         |   |          |          |          |   |          |          |          |   |         |         |         |   |          |          |         |   |          |         |          |   |         |          |         |   |         |          |          |   |         |          |          |   |         |          |          |   |         |          |          |   |         |          |         |   |         |          |         |   |         |          |         |   |         |         |         |   |          |          |         |   |          |          |         |   |          |          |         |   |          |          |         |   |          |          |         |   |          |          |         |   |          |          |         |   |          |          |         |   |          |          |         |   |          |          |          |                                                                                                                                                                                                                       |                                                                                                                                                                                                                                                                                                                                                                                                                                                                                                                                                                                                                                                                                                                                                                                                                                                                                                                                                                                                                                                                                                                                                                                                                                                                                                                                                                                                                                                                                                                                                                                                                                                                                                                                                                                                                                                                                                                                                                                                                                                                                                                                                                                                                                                                                                                                                                                                                                                                                                                                                                                                                                                                                                                                                                                                                                                                                                                                         |          |          |          |          |         |         |          |          |         |          |                                                                                                                                                                                                                         |                                                                                                                                                                                                                                                                                                                                                                                                                                                                                                                                                                                                                                                                                                                                                                                                                                                                                                                                                                                                                                                                                                                                                                                                                                                                                                                                                                                                                                                                                                                                                                                                                                                                                                                                                                                                                                                                                                                                                                                                                                                                                                                                                                                                                                                                                                                                                                                                                                                                                                                                                                                                                                                                                                                                                                                                                                                                                                                                                                                                                                                                                                                                                             |   |          |          |          |   |          |          |          |   |          |          |          |   |          |          |          |   |          |          |          |   |          |          |          |   |          |          |          |   |          |         |         |   |          |         |         |   |         |         |         |   |          |         |         |   |          |         |         |   |         |          |          |   |          |          |          |   |         |         |         |   |         |          |          |   |          |          |          |   |          |         |          |   |          |          |          |   |          |          |         |   |          |          |         |   |          |          |          |   |         |          |         |   |         |          |         |   |         |          |          |   |          |          |         |   |          |          |          |   |          |          |          |   |          |          |          |   |          |          |          |   |          |         |          |   |          |         |          |   |          |         |          |   |          |         |          |   |          |         |          |   |         |          |          |   |         |          |          |   |         |         |          |   |         |         |          |   |          |          |         |   |          |          |         |   |          |          |         |   |          |          |         |
| H                                                                                                                                                                                                                      | 1.03063                                                                                                                                                                                                                                                                                                                                                                                                                                                                                                                                                                                                                                                                                                                                                                                                                                                                                                                                                                                                                                                                                                                                                                                                                                                                                                                                                                                                                                                                                                                                                                                                                                                                                                                                                                                                                                                                                                                                                                                                                                                                                                                                                                                                                                                                                                                                                                                                                                                                                                                                                                                                                                                                                                                                                                                                                                                                                                                                                                                                                                                                                                                                                        | 3.46884  | -2.84815 |          |          |   |          |          |          |   |          |          |          |   |          |          |          |   |          |         |          |   |          |          |          |   |          |          |          |   |          |         |          |   |          |         |          |   |         |         |         |   |         |         |         |   |          |         |          |   |          |         |         |   |         |         |         |   |          |         |         |   |         |         |         |   |          |          |          |   |          |          |          |   |         |         |         |   |          |          |         |   |          |         |          |   |         |          |         |   |         |          |          |   |         |          |          |   |         |          |          |   |         |          |          |   |         |          |         |   |         |          |         |   |         |          |         |   |         |         |         |   |          |          |         |   |          |          |         |   |          |          |         |   |          |          |         |   |          |          |         |   |          |          |         |   |          |          |         |   |          |          |         |   |          |          |         |   |          |          |          |                                                                                                                                                                                                                       |                                                                                                                                                                                                                                                                                                                                                                                                                                                                                                                                                                                                                                                                                                                                                                                                                                                                                                                                                                                                                                                                                                                                                                                                                                                                                                                                                                                                                                                                                                                                                                                                                                                                                                                                                                                                                                                                                                                                                                                                                                                                                                                                                                                                                                                                                                                                                                                                                                                                                                                                                                                                                                                                                                                                                                                                                                                                                                                                         |          |          |          |          |         |         |          |          |         |          |                                                                                                                                                                                                                         |                                                                                                                                                                                                                                                                                                                                                                                                                                                                                                                                                                                                                                                                                                                                                                                                                                                                                                                                                                                                                                                                                                                                                                                                                                                                                                                                                                                                                                                                                                                                                                                                                                                                                                                                                                                                                                                                                                                                                                                                                                                                                                                                                                                                                                                                                                                                                                                                                                                                                                                                                                                                                                                                                                                                                                                                                                                                                                                                                                                                                                                                                                                                                             |   |          |          |          |   |          |          |          |   |          |          |          |   |          |          |          |   |          |          |          |   |          |          |          |   |          |          |          |   |          |         |         |   |          |         |         |   |         |         |         |   |          |         |         |   |          |         |         |   |         |          |          |   |          |          |          |   |         |         |         |   |         |          |          |   |          |          |          |   |          |         |          |   |          |          |          |   |          |          |         |   |          |          |         |   |          |          |          |   |         |          |         |   |         |          |         |   |         |          |          |   |          |          |         |   |          |          |          |   |          |          |          |   |          |          |          |   |          |          |          |   |          |         |          |   |          |         |          |   |          |         |          |   |          |         |          |   |          |         |          |   |         |          |          |   |         |          |          |   |         |         |          |   |         |         |          |   |          |          |         |   |          |          |         |   |          |          |         |   |          |          |         |
| H                                                                                                                                                                                                                      | 1.90627                                                                                                                                                                                                                                                                                                                                                                                                                                                                                                                                                                                                                                                                                                                                                                                                                                                                                                                                                                                                                                                                                                                                                                                                                                                                                                                                                                                                                                                                                                                                                                                                                                                                                                                                                                                                                                                                                                                                                                                                                                                                                                                                                                                                                                                                                                                                                                                                                                                                                                                                                                                                                                                                                                                                                                                                                                                                                                                                                                                                                                                                                                                                                        | 2.27585  | -1.86866 |          |          |   |          |          |          |   |          |          |          |   |          |          |          |   |          |         |          |   |          |          |          |   |          |          |          |   |          |         |          |   |          |         |          |   |         |         |         |   |         |         |         |   |          |         |          |   |          |         |         |   |         |         |         |   |          |         |         |   |         |         |         |   |          |          |          |   |          |          |          |   |         |         |         |   |          |          |         |   |          |         |          |   |         |          |         |   |         |          |          |   |         |          |          |   |         |          |          |   |         |          |          |   |         |          |         |   |         |          |         |   |         |          |         |   |         |         |         |   |          |          |         |   |          |          |         |   |          |          |         |   |          |          |         |   |          |          |         |   |          |          |         |   |          |          |         |   |          |          |         |   |          |          |         |   |          |          |          |                                                                                                                                                                                                                       |                                                                                                                                                                                                                                                                                                                                                                                                                                                                                                                                                                                                                                                                                                                                                                                                                                                                                                                                                                                                                                                                                                                                                                                                                                                                                                                                                                                                                                                                                                                                                                                                                                                                                                                                                                                                                                                                                                                                                                                                                                                                                                                                                                                                                                                                                                                                                                                                                                                                                                                                                                                                                                                                                                                                                                                                                                                                                                                                         |          |          |          |          |         |         |          |          |         |          |                                                                                                                                                                                                                         |                                                                                                                                                                                                                                                                                                                                                                                                                                                                                                                                                                                                                                                                                                                                                                                                                                                                                                                                                                                                                                                                                                                                                                                                                                                                                                                                                                                                                                                                                                                                                                                                                                                                                                                                                                                                                                                                                                                                                                                                                                                                                                                                                                                                                                                                                                                                                                                                                                                                                                                                                                                                                                                                                                                                                                                                                                                                                                                                                                                                                                                                                                                                                             |   |          |          |          |   |          |          |          |   |          |          |          |   |          |          |          |   |          |          |          |   |          |          |          |   |          |          |          |   |          |         |         |   |          |         |         |   |         |         |         |   |          |         |         |   |          |         |         |   |         |          |          |   |          |          |          |   |         |         |         |   |         |          |          |   |          |          |          |   |          |         |          |   |          |          |          |   |          |          |         |   |          |          |         |   |          |          |          |   |         |          |         |   |         |          |         |   |         |          |          |   |          |          |         |   |          |          |          |   |          |          |          |   |          |          |          |   |          |          |          |   |          |         |          |   |          |         |          |   |          |         |          |   |          |         |          |   |          |         |          |   |         |          |          |   |         |          |          |   |         |         |          |   |         |         |          |   |          |          |         |   |          |          |         |   |          |          |         |   |          |          |         |
| C                                                                                                                                                                                                                      | 0.22024                                                                                                                                                                                                                                                                                                                                                                                                                                                                                                                                                                                                                                                                                                                                                                                                                                                                                                                                                                                                                                                                                                                                                                                                                                                                                                                                                                                                                                                                                                                                                                                                                                                                                                                                                                                                                                                                                                                                                                                                                                                                                                                                                                                                                                                                                                                                                                                                                                                                                                                                                                                                                                                                                                                                                                                                                                                                                                                                                                                                                                                                                                                                                        | -2.60915 | 1.24085  |          |          |   |          |          |          |   |          |          |          |   |          |          |          |   |          |         |          |   |          |          |          |   |          |          |          |   |          |         |          |   |          |         |          |   |         |         |         |   |         |         |         |   |          |         |          |   |          |         |         |   |         |         |         |   |          |         |         |   |         |         |         |   |          |          |          |   |          |          |          |   |         |         |         |   |          |          |         |   |          |         |          |   |         |          |         |   |         |          |          |   |         |          |          |   |         |          |          |   |         |          |          |   |         |          |         |   |         |          |         |   |         |          |         |   |         |         |         |   |          |          |         |   |          |          |         |   |          |          |         |   |          |          |         |   |          |          |         |   |          |          |         |   |          |          |         |   |          |          |         |   |          |          |         |   |          |          |          |                                                                                                                                                                                                                       |                                                                                                                                                                                                                                                                                                                                                                                                                                                                                                                                                                                                                                                                                                                                                                                                                                                                                                                                                                                                                                                                                                                                                                                                                                                                                                                                                                                                                                                                                                                                                                                                                                                                                                                                                                                                                                                                                                                                                                                                                                                                                                                                                                                                                                                                                                                                                                                                                                                                                                                                                                                                                                                                                                                                                                                                                                                                                                                                         |          |          |          |          |         |         |          |          |         |          |                                                                                                                                                                                                                         |                                                                                                                                                                                                                                                                                                                                                                                                                                                                                                                                                                                                                                                                                                                                                                                                                                                                                                                                                                                                                                                                                                                                                                                                                                                                                                                                                                                                                                                                                                                                                                                                                                                                                                                                                                                                                                                                                                                                                                                                                                                                                                                                                                                                                                                                                                                                                                                                                                                                                                                                                                                                                                                                                                                                                                                                                                                                                                                                                                                                                                                                                                                                                             |   |          |          |          |   |          |          |          |   |          |          |          |   |          |          |          |   |          |          |          |   |          |          |          |   |          |          |          |   |          |         |         |   |          |         |         |   |         |         |         |   |          |         |         |   |          |         |         |   |         |          |          |   |          |          |          |   |         |         |         |   |         |          |          |   |          |          |          |   |          |         |          |   |          |          |          |   |          |          |         |   |          |          |         |   |          |          |          |   |         |          |         |   |         |          |         |   |         |          |          |   |          |          |         |   |          |          |          |   |          |          |          |   |          |          |          |   |          |          |          |   |          |         |          |   |          |         |          |   |          |         |          |   |          |         |          |   |          |         |          |   |         |          |          |   |         |          |          |   |         |         |          |   |         |         |          |   |          |          |         |   |          |          |         |   |          |          |         |   |          |          |         |
| H                                                                                                                                                                                                                      | 0.64887                                                                                                                                                                                                                                                                                                                                                                                                                                                                                                                                                                                                                                                                                                                                                                                                                                                                                                                                                                                                                                                                                                                                                                                                                                                                                                                                                                                                                                                                                                                                                                                                                                                                                                                                                                                                                                                                                                                                                                                                                                                                                                                                                                                                                                                                                                                                                                                                                                                                                                                                                                                                                                                                                                                                                                                                                                                                                                                                                                                                                                                                                                                                                        | -1.86825 | 1.90652  |          |          |   |          |          |          |   |          |          |          |   |          |          |          |   |          |         |          |   |          |          |          |   |          |          |          |   |          |         |          |   |          |         |          |   |         |         |         |   |         |         |         |   |          |         |          |   |          |         |         |   |         |         |         |   |          |         |         |   |         |         |         |   |          |          |          |   |          |          |          |   |         |         |         |   |          |          |         |   |          |         |          |   |         |          |         |   |         |          |          |   |         |          |          |   |         |          |          |   |         |          |          |   |         |          |         |   |         |          |         |   |         |          |         |   |         |         |         |   |          |          |         |   |          |          |         |   |          |          |         |   |          |          |         |   |          |          |         |   |          |          |         |   |          |          |         |   |          |          |         |   |          |          |         |   |          |          |          |                                                                                                                                                                                                                       |                                                                                                                                                                                                                                                                                                                                                                                                                                                                                                                                                                                                                                                                                                                                                                                                                                                                                                                                                                                                                                                                                                                                                                                                                                                                                                                                                                                                                                                                                                                                                                                                                                                                                                                                                                                                                                                                                                                                                                                                                                                                                                                                                                                                                                                                                                                                                                                                                                                                                                                                                                                                                                                                                                                                                                                                                                                                                                                                         |          |          |          |          |         |         |          |          |         |          |                                                                                                                                                                                                                         |                                                                                                                                                                                                                                                                                                                                                                                                                                                                                                                                                                                                                                                                                                                                                                                                                                                                                                                                                                                                                                                                                                                                                                                                                                                                                                                                                                                                                                                                                                                                                                                                                                                                                                                                                                                                                                                                                                                                                                                                                                                                                                                                                                                                                                                                                                                                                                                                                                                                                                                                                                                                                                                                                                                                                                                                                                                                                                                                                                                                                                                                                                                                                             |   |          |          |          |   |          |          |          |   |          |          |          |   |          |          |          |   |          |          |          |   |          |          |          |   |          |          |          |   |          |         |         |   |          |         |         |   |         |         |         |   |          |         |         |   |          |         |         |   |         |          |          |   |          |          |          |   |         |         |         |   |         |          |          |   |          |          |          |   |          |         |          |   |          |          |          |   |          |          |         |   |          |          |         |   |          |          |          |   |         |          |         |   |         |          |         |   |         |          |          |   |          |          |         |   |          |          |          |   |          |          |          |   |          |          |          |   |          |          |          |   |          |         |          |   |          |         |          |   |          |         |          |   |          |         |          |   |          |         |          |   |         |          |          |   |         |          |          |   |         |         |          |   |         |         |          |   |          |          |         |   |          |          |         |   |          |          |         |   |          |          |         |
|  <p><b>2d</b><br/>                     -738.3279895<br/>                     -738.2173119<br/>                     -738.9191202</p> | <table border="1"> <tbody> <tr><td>C</td><td>-2.12159</td><td>-1.61004</td><td>-2.79661</td></tr> <tr><td>C</td><td>-0.76829</td><td>0.21581</td><td>-1.17311</td></tr> <tr><td>C</td><td>-2.15989</td><td>-1.73119</td><td>-1.41206</td></tr> <tr><td>C</td><td>-1.40995</td><td>-0.56716</td><td>-3.37754</td></tr> <tr><td>C</td><td>-0.74580</td><td>0.34138</td><td>-2.56225</td></tr> <tr><td>C</td><td>-1.49035</td><td>-0.83234</td><td>-0.58130</td></tr> <tr><td>H</td><td>-2.71807</td><td>-2.54582</td><td>-0.97084</td></tr> <tr><td>H</td><td>-0.18951</td><td>1.15932</td><td>-3.00256</td></tr> <tr><td>C</td><td>-0.09856</td><td>1.26602</td><td>-0.34724</td></tr> <tr><td>C</td><td>0.83083</td><td>3.41534</td><td>1.19241</td></tr> <tr><td>C</td><td>1.14665</td><td>1.15143</td><td>0.29966</td></tr> <tr><td>C</td><td>-0.83342</td><td>2.45574</td><td>-0.22277</td></tr> <tr><td>C</td><td>-0.38646</td><td>3.52705</td><td>0.53143</td></tr> <tr><td>C</td><td>1.56832</td><td>2.25010</td><td>1.06712</td></tr> <tr><td>H</td><td>-0.98035</td><td>4.42861</td><td>0.60674</td></tr> <tr><td>H</td><td>2.51475</td><td>2.18909</td><td>1.58519</td></tr> <tr><td>H</td><td>-1.37189</td><td>-0.46017</td><td>-4.45389</td></tr> <tr><td>H</td><td>-2.64624</td><td>-2.32610</td><td>-3.41601</td></tr> <tr><td>H</td><td>1.20748</td><td>4.22932</td><td>1.79831</td></tr> <tr><td>C</td><td>-1.56355</td><td>-0.96369</td><td>0.92848</td></tr> <tr><td>H</td><td>-1.78576</td><td>2.51921</td><td>-0.73354</td></tr> <tr><td>C</td><td>2.11898</td><td>-0.04698</td><td>0.25607</td></tr> <tr><td>C</td><td>1.70124</td><td>-1.23984</td><td>-0.61433</td></tr> <tr><td>H</td><td>2.52002</td><td>-1.96330</td><td>-0.60413</td></tr> <tr><td>H</td><td>1.51346</td><td>-0.95126</td><td>-1.64703</td></tr> <tr><td>H</td><td>0.81347</td><td>-1.73694</td><td>-0.23254</td></tr> <tr><td>C</td><td>2.32006</td><td>-0.58343</td><td>1.68789</td></tr> <tr><td>H</td><td>3.03228</td><td>-1.41205</td><td>1.67140</td></tr> <tr><td>H</td><td>1.37584</td><td>-0.95179</td><td>2.09448</td></tr> <tr><td>H</td><td>2.70485</td><td>0.18452</td><td>2.35921</td></tr> <tr><td>H</td><td>-0.67761</td><td>-0.48226</td><td>1.34326</td></tr> <tr><td>C</td><td>-1.56733</td><td>-2.41384</td><td>1.41864</td></tr> <tr><td>H</td><td>-0.72028</td><td>-2.97176</td><td>1.01402</td></tr> <tr><td>H</td><td>-2.48453</td><td>-2.93126</td><td>1.12963</td></tr> <tr><td>H</td><td>-1.50714</td><td>-2.43492</td><td>2.50880</td></tr> <tr><td>C</td><td>-2.78765</td><td>-0.20732</td><td>1.46462</td></tr> <tr><td>H</td><td>-3.70545</td><td>-0.64275</td><td>1.06128</td></tr> <tr><td>H</td><td>-2.74904</td><td>0.84400</td><td>1.17588</td></tr> <tr><td>H</td><td>-2.82744</td><td>-0.26714</td><td>2.55523</td></tr> <tr><td>C</td><td>3.47710</td><td>0.44011</td><td>-0.29359</td></tr> <tr><td>H</td><td>4.18444</td><td>-0.39256</td><td>-0.30423</td></tr> <tr><td>H</td><td>3.90348</td><td>1.24017</td><td>0.31107</td></tr> <tr><td>H</td><td>3.36287</td><td>0.80871</td><td>-1.31524</td></tr> </tbody> </table> | C        | -2.12159 | -1.61004 | -2.79661 | C | -0.76829 | 0.21581  | -1.17311 | C | -2.15989 | -1.73119 | -1.41206 | C | -1.40995 | -0.56716 | -3.37754 | C | -0.74580 | 0.34138 | -2.56225 | C | -1.49035 | -0.83234 | -0.58130 | H | -2.71807 | -2.54582 | -0.97084 | H | -0.18951 | 1.15932 | -3.00256 | C | -0.09856 | 1.26602 | -0.34724 | C | 0.83083 | 3.41534 | 1.19241 | C | 1.14665 | 1.15143 | 0.29966 | C | -0.83342 | 2.45574 | -0.22277 | C | -0.38646 | 3.52705 | 0.53143 | C | 1.56832 | 2.25010 | 1.06712 | H | -0.98035 | 4.42861 | 0.60674 | H | 2.51475 | 2.18909 | 1.58519 | H | -1.37189 | -0.46017 | -4.45389 | H | -2.64624 | -2.32610 | -3.41601 | H | 1.20748 | 4.22932 | 1.79831 | C | -1.56355 | -0.96369 | 0.92848 | H | -1.78576 | 2.51921 | -0.73354 | C | 2.11898 | -0.04698 | 0.25607 | C | 1.70124 | -1.23984 | -0.61433 | H | 2.52002 | -1.96330 | -0.60413 | H | 1.51346 | -0.95126 | -1.64703 | H | 0.81347 | -1.73694 | -0.23254 | C | 2.32006 | -0.58343 | 1.68789 | H | 3.03228 | -1.41205 | 1.67140 | H | 1.37584 | -0.95179 | 2.09448 | H | 2.70485 | 0.18452 | 2.35921 | H | -0.67761 | -0.48226 | 1.34326 | C | -1.56733 | -2.41384 | 1.41864 | H | -0.72028 | -2.97176 | 1.01402 | H | -2.48453 | -2.93126 | 1.12963 | H | -1.50714 | -2.43492 | 2.50880 | C | -2.78765 | -0.20732 | 1.46462 | H | -3.70545 | -0.64275 | 1.06128 | H | -2.74904 | 0.84400  | 1.17588 | H | -2.82744 | -0.26714 | 2.55523 | C | 3.47710  | 0.44011  | -0.29359 | H                                                                                                                                                                                                                     | 4.18444                                                                                                                                                                                                                                                                                                                                                                                                                                                                                                                                                                                                                                                                                                                                                                                                                                                                                                                                                                                                                                                                                                                                                                                                                                                                                                                                                                                                                                                                                                                                                                                                                                                                                                                                                                                                                                                                                                                                                                                                                                                                                                                                                                                                                                                                                                                                                                                                                                                                                                                                                                                                                                                                                                                                                                                                                                                                                                                                 | -0.39256 | -0.30423 | H        | 3.90348  | 1.24017 | 0.31107 | H        | 3.36287  | 0.80871 | -1.31524 |  <p><b>2d</b><br/>                     -738.2779511<br/>                     -738.1679929<br/>                     -738.8726330</p> | <table border="1"> <tbody> <tr><td>C</td><td>-0.57142</td><td>-2.24432</td><td>-2.68543</td></tr> <tr><td>C</td><td>-0.03202</td><td>-0.42580</td><td>-0.56201</td></tr> <tr><td>C</td><td>-0.64379</td><td>-2.62960</td><td>-1.35577</td></tr> <tr><td>C</td><td>-0.00499</td><td>-1.01481</td><td>-2.96625</td></tr> <tr><td>C</td><td>0.24864</td><td>-0.14980</td><td>-1.91604</td></tr> <tr><td>C</td><td>-0.27239</td><td>-1.82291</td><td>-0.27085</td></tr> <tr><td>H</td><td>-0.95281</td><td>-3.64363</td><td>-1.16216</td></tr> <tr><td>C</td><td>-0.09353</td><td>0.73603</td><td>0.39896</td></tr> <tr><td>C</td><td>-0.01308</td><td>2.70967</td><td>2.46705</td></tr> <tr><td>C</td><td>0.05639</td><td>2.12804</td><td>0.07990</td></tr> <tr><td>C</td><td>-0.41797</td><td>0.47464</td><td>1.74183</td></tr> <tr><td>C</td><td>-0.38219</td><td>1.40772</td><td>2.76174</td></tr> <tr><td>C</td><td>0.16552</td><td>3.04251</td><td>1.13554</td></tr> <tr><td>H</td><td>-0.63124</td><td>1.10712</td><td>3.77117</td></tr> <tr><td>H</td><td>0.35870</td><td>0.07795</td><td>0.89451</td></tr> <tr><td>H</td><td>0.22152</td><td>-0.71149</td><td>-3.98000</td></tr> <tr><td>H</td><td>-0.87110</td><td>-2.92774</td><td>-3.46893</td></tr> <tr><td>H</td><td>0.07868</td><td>3.46217</td><td>3.23927</td></tr> <tr><td>H</td><td>0.69779</td><td>0.78597</td><td>-2.16854</td></tr> <tr><td>H</td><td>-0.71428</td><td>-0.51304</td><td>2.00641</td></tr> <tr><td>C</td><td>0.01200</td><td>-2.61937</td><td>1.04443</td></tr> <tr><td>C</td><td>0.01155</td><td>2.78597</td><td>-1.30298</td></tr> <tr><td>C</td><td>0.43425</td><td>-4.08142</td><td>0.71942</td></tr> <tr><td>H</td><td>0.82496</td><td>-4.53173</td><td>1.63392</td></tr> <tr><td>H</td><td>1.21554</td><td>-4.10662</td><td>-0.04064</td></tr> <tr><td>H</td><td>-0.39813</td><td>-4.70307</td><td>0.39042</td></tr> <tr><td>C</td><td>1.26100</td><td>-2.07077</td><td>1.77648</td></tr> <tr><td>H</td><td>1.24017</td><td>-1.01396</td><td>2.00928</td></tr> <tr><td>H</td><td>2.14014</td><td>-2.25002</td><td>1.15355</td></tr> <tr><td>H</td><td>1.39364</td><td>-6.22282</td><td>2.71003</td></tr> <tr><td>H</td><td>-0.47187</td><td>2.10423</td><td>-1.99381</td></tr> <tr><td>C</td><td>-0.86872</td><td>4.04876</td><td>-1.34043</td></tr> <tr><td>H</td><td>-0.40964</td><td>4.89511</td><td>-0.82758</td></tr> <tr><td>H</td><td>-1.84386</td><td>3.86150</td><td>-0.88822</td></tr> <tr><td>H</td><td>-1.01888</td><td>4.34127</td><td>-2.38225</td></tr> <tr><td>C</td><td>1.41758</td><td>3.13178</td><td>-1.81628</td></tr> <tr><td>H</td><td>1.87092</td><td>3.87502</td><td>-1.15596</td></tr> <tr><td>H</td><td>1.36895</td><td>3.55407</td><td>-2.82310</td></tr> <tr><td>H</td><td>2.07886</td><td>2.26339</td><td>-1.83363</td></tr> <tr><td>C</td><td>-1.23112</td><td>-2.78812</td><td>1.94957</td></tr> <tr><td>H</td><td>-1.69925</td><td>-1.86512</td><td>2.28276</td></tr> <tr><td>H</td><td>-0.95650</td><td>-3.36478</td><td>2.83665</td></tr> <tr><td>H</td><td>-1.99137</td><td>-3.34987</td><td>1.40261</td></tr> </tbody> </table> | C | -0.57142 | -2.24432 | -2.68543 | C | -0.03202 | -0.42580 | -0.56201 | C | -0.64379 | -2.62960 | -1.35577 | C | -0.00499 | -1.01481 | -2.96625 | C | 0.24864  | -0.14980 | -1.91604 | C | -0.27239 | -1.82291 | -0.27085 | H | -0.95281 | -3.64363 | -1.16216 | C | -0.09353 | 0.73603 | 0.39896 | C | -0.01308 | 2.70967 | 2.46705 | C | 0.05639 | 2.12804 | 0.07990 | C | -0.41797 | 0.47464 | 1.74183 | C | -0.38219 | 1.40772 | 2.76174 | C | 0.16552 | 3.04251  | 1.13554  | H | -0.63124 | 1.10712  | 3.77117  | H | 0.35870 | 0.07795 | 0.89451 | H | 0.22152 | -0.71149 | -3.98000 | H | -0.87110 | -2.92774 | -3.46893 | H | 0.07868  | 3.46217 | 3.23927  | H | 0.69779  | 0.78597  | -2.16854 | H | -0.71428 | -0.51304 | 2.00641 | C | 0.01200  | -2.61937 | 1.04443 | C | 0.01155  | 2.78597  | -1.30298 | C | 0.43425 | -4.08142 | 0.71942 | H | 0.82496 | -4.53173 | 1.63392 | H | 1.21554 | -4.10662 | -0.04064 | H | -0.39813 | -4.70307 | 0.39042 | C | 1.26100  | -2.07077 | 1.77648  | H | 1.24017  | -1.01396 | 2.00928  | H | 2.14014  | -2.25002 | 1.15355  | H | 1.39364  | -6.22282 | 2.71003  | H | -0.47187 | 2.10423 | -1.99381 | C | -0.86872 | 4.04876 | -1.34043 | H | -0.40964 | 4.89511 | -0.82758 | H | -1.84386 | 3.86150 | -0.88822 | H | -1.01888 | 4.34127 | -2.38225 | C | 1.41758 | 3.13178  | -1.81628 | H | 1.87092 | 3.87502  | -1.15596 | H | 1.36895 | 3.55407 | -2.82310 | H | 2.07886 | 2.26339 | -1.83363 | C | -1.23112 | -2.78812 | 1.94957 | H | -1.69925 | -1.86512 | 2.28276 | H | -0.95650 | -3.36478 | 2.83665 | H | -1.99137 | -3.34987 | 1.40261 |
| C                                                                                                                                                                                                                      | -2.12159                                                                                                                                                                                                                                                                                                                                                                                                                                                                                                                                                                                                                                                                                                                                                                                                                                                                                                                                                                                                                                                                                                                                                                                                                                                                                                                                                                                                                                                                                                                                                                                                                                                                                                                                                                                                                                                                                                                                                                                                                                                                                                                                                                                                                                                                                                                                                                                                                                                                                                                                                                                                                                                                                                                                                                                                                                                                                                                                                                                                                                                                                                                                                       | -1.61004 | -2.79661 |          |          |   |          |          |          |   |          |          |          |   |          |          |          |   |          |         |          |   |          |          |          |   |          |          |          |   |          |         |          |   |          |         |          |   |         |         |         |   |         |         |         |   |          |         |          |   |          |         |         |   |         |         |         |   |          |         |         |   |         |         |         |   |          |          |          |   |          |          |          |   |         |         |         |   |          |          |         |   |          |         |          |   |         |          |         |   |         |          |          |   |         |          |          |   |         |          |          |   |         |          |          |   |         |          |         |   |         |          |         |   |         |          |         |   |         |         |         |   |          |          |         |   |          |          |         |   |          |          |         |   |          |          |         |   |          |          |         |   |          |          |         |   |          |          |         |   |          |          |         |   |          |          |         |   |          |          |          |                                                                                                                                                                                                                       |                                                                                                                                                                                                                                                                                                                                                                                                                                                                                                                                                                                                                                                                                                                                                                                                                                                                                                                                                                                                                                                                                                                                                                                                                                                                                                                                                                                                                                                                                                                                                                                                                                                                                                                                                                                                                                                                                                                                                                                                                                                                                                                                                                                                                                                                                                                                                                                                                                                                                                                                                                                                                                                                                                                                                                                                                                                                                                                                         |          |          |          |          |         |         |          |          |         |          |                                                                                                                                                                                                                         |                                                                                                                                                                                                                                                                                                                                                                                                                                                                                                                                                                                                                                                                                                                                                                                                                                                                                                                                                                                                                                                                                                                                                                                                                                                                                                                                                                                                                                                                                                                                                                                                                                                                                                                                                                                                                                                                                                                                                                                                                                                                                                                                                                                                                                                                                                                                                                                                                                                                                                                                                                                                                                                                                                                                                                                                                                                                                                                                                                                                                                                                                                                                                             |   |          |          |          |   |          |          |          |   |          |          |          |   |          |          |          |   |          |          |          |   |          |          |          |   |          |          |          |   |          |         |         |   |          |         |         |   |         |         |         |   |          |         |         |   |          |         |         |   |         |          |          |   |          |          |          |   |         |         |         |   |         |          |          |   |          |          |          |   |          |         |          |   |          |          |          |   |          |          |         |   |          |          |         |   |          |          |          |   |         |          |         |   |         |          |         |   |         |          |          |   |          |          |         |   |          |          |          |   |          |          |          |   |          |          |          |   |          |          |          |   |          |         |          |   |          |         |          |   |          |         |          |   |          |         |          |   |          |         |          |   |         |          |          |   |         |          |          |   |         |         |          |   |         |         |          |   |          |          |         |   |          |          |         |   |          |          |         |   |          |          |         |
| C                                                                                                                                                                                                                      | -0.76829                                                                                                                                                                                                                                                                                                                                                                                                                                                                                                                                                                                                                                                                                                                                                                                                                                                                                                                                                                                                                                                                                                                                                                                                                                                                                                                                                                                                                                                                                                                                                                                                                                                                                                                                                                                                                                                                                                                                                                                                                                                                                                                                                                                                                                                                                                                                                                                                                                                                                                                                                                                                                                                                                                                                                                                                                                                                                                                                                                                                                                                                                                                                                       | 0.21581  | -1.17311 |          |          |   |          |          |          |   |          |          |          |   |          |          |          |   |          |         |          |   |          |          |          |   |          |          |          |   |          |         |          |   |          |         |          |   |         |         |         |   |         |         |         |   |          |         |          |   |          |         |         |   |         |         |         |   |          |         |         |   |         |         |         |   |          |          |          |   |          |          |          |   |         |         |         |   |          |          |         |   |          |         |          |   |         |          |         |   |         |          |          |   |         |          |          |   |         |          |          |   |         |          |          |   |         |          |         |   |         |          |         |   |         |          |         |   |         |         |         |   |          |          |         |   |          |          |         |   |          |          |         |   |          |          |         |   |          |          |         |   |          |          |         |   |          |          |         |   |          |          |         |   |          |          |         |   |          |          |          |                                                                                                                                                                                                                       |                                                                                                                                                                                                                                                                                                                                                                                                                                                                                                                                                                                                                                                                                                                                                                                                                                                                                                                                                                                                                                                                                                                                                                                                                                                                                                                                                                                                                                                                                                                                                                                                                                                                                                                                                                                                                                                                                                                                                                                                                                                                                                                                                                                                                                                                                                                                                                                                                                                                                                                                                                                                                                                                                                                                                                                                                                                                                                                                         |          |          |          |          |         |         |          |          |         |          |                                                                                                                                                                                                                         |                                                                                                                                                                                                                                                                                                                                                                                                                                                                                                                                                                                                                                                                                                                                                                                                                                                                                                                                                                                                                                                                                                                                                                                                                                                                                                                                                                                                                                                                                                                                                                                                                                                                                                                                                                                                                                                                                                                                                                                                                                                                                                                                                                                                                                                                                                                                                                                                                                                                                                                                                                                                                                                                                                                                                                                                                                                                                                                                                                                                                                                                                                                                                             |   |          |          |          |   |          |          |          |   |          |          |          |   |          |          |          |   |          |          |          |   |          |          |          |   |          |          |          |   |          |         |         |   |          |         |         |   |         |         |         |   |          |         |         |   |          |         |         |   |         |          |          |   |          |          |          |   |         |         |         |   |         |          |          |   |          |          |          |   |          |         |          |   |          |          |          |   |          |          |         |   |          |          |         |   |          |          |          |   |         |          |         |   |         |          |         |   |         |          |          |   |          |          |         |   |          |          |          |   |          |          |          |   |          |          |          |   |          |          |          |   |          |         |          |   |          |         |          |   |          |         |          |   |          |         |          |   |          |         |          |   |         |          |          |   |         |          |          |   |         |         |          |   |         |         |          |   |          |          |         |   |          |          |         |   |          |          |         |   |          |          |         |
| C                                                                                                                                                                                                                      | -2.15989                                                                                                                                                                                                                                                                                                                                                                                                                                                                                                                                                                                                                                                                                                                                                                                                                                                                                                                                                                                                                                                                                                                                                                                                                                                                                                                                                                                                                                                                                                                                                                                                                                                                                                                                                                                                                                                                                                                                                                                                                                                                                                                                                                                                                                                                                                                                                                                                                                                                                                                                                                                                                                                                                                                                                                                                                                                                                                                                                                                                                                                                                                                                                       | -1.73119 | -1.41206 |          |          |   |          |          |          |   |          |          |          |   |          |          |          |   |          |         |          |   |          |          |          |   |          |          |          |   |          |         |          |   |          |         |          |   |         |         |         |   |         |         |         |   |          |         |          |   |          |         |         |   |         |         |         |   |          |         |         |   |         |         |         |   |          |          |          |   |          |          |          |   |         |         |         |   |          |          |         |   |          |         |          |   |         |          |         |   |         |          |          |   |         |          |          |   |         |          |          |   |         |          |          |   |         |          |         |   |         |          |         |   |         |          |         |   |         |         |         |   |          |          |         |   |          |          |         |   |          |          |         |   |          |          |         |   |          |          |         |   |          |          |         |   |          |          |         |   |          |          |         |   |          |          |         |   |          |          |          |                                                                                                                                                                                                                       |                                                                                                                                                                                                                                                                                                                                                                                                                                                                                                                                                                                                                                                                                                                                                                                                                                                                                                                                                                                                                                                                                                                                                                                                                                                                                                                                                                                                                                                                                                                                                                                                                                                                                                                                                                                                                                                                                                                                                                                                                                                                                                                                                                                                                                                                                                                                                                                                                                                                                                                                                                                                                                                                                                                                                                                                                                                                                                                                         |          |          |          |          |         |         |          |          |         |          |                                                                                                                                                                                                                         |                                                                                                                                                                                                                                                                                                                                                                                                                                                                                                                                                                                                                                                                                                                                                                                                                                                                                                                                                                                                                                                                                                                                                                                                                                                                                                                                                                                                                                                                                                                                                                                                                                                                                                                                                                                                                                                                                                                                                                                                                                                                                                                                                                                                                                                                                                                                                                                                                                                                                                                                                                                                                                                                                                                                                                                                                                                                                                                                                                                                                                                                                                                                                             |   |          |          |          |   |          |          |          |   |          |          |          |   |          |          |          |   |          |          |          |   |          |          |          |   |          |          |          |   |          |         |         |   |          |         |         |   |         |         |         |   |          |         |         |   |          |         |         |   |         |          |          |   |          |          |          |   |         |         |         |   |         |          |          |   |          |          |          |   |          |         |          |   |          |          |          |   |          |          |         |   |          |          |         |   |          |          |          |   |         |          |         |   |         |          |         |   |         |          |          |   |          |          |         |   |          |          |          |   |          |          |          |   |          |          |          |   |          |          |          |   |          |         |          |   |          |         |          |   |          |         |          |   |          |         |          |   |          |         |          |   |         |          |          |   |         |          |          |   |         |         |          |   |         |         |          |   |          |          |         |   |          |          |         |   |          |          |         |   |          |          |         |
| C                                                                                                                                                                                                                      | -1.40995                                                                                                                                                                                                                                                                                                                                                                                                                                                                                                                                                                                                                                                                                                                                                                                                                                                                                                                                                                                                                                                                                                                                                                                                                                                                                                                                                                                                                                                                                                                                                                                                                                                                                                                                                                                                                                                                                                                                                                                                                                                                                                                                                                                                                                                                                                                                                                                                                                                                                                                                                                                                                                                                                                                                                                                                                                                                                                                                                                                                                                                                                                                                                       | -0.56716 | -3.37754 |          |          |   |          |          |          |   |          |          |          |   |          |          |          |   |          |         |          |   |          |          |          |   |          |          |          |   |          |         |          |   |          |         |          |   |         |         |         |   |         |         |         |   |          |         |          |   |          |         |         |   |         |         |         |   |          |         |         |   |         |         |         |   |          |          |          |   |          |          |          |   |         |         |         |   |          |          |         |   |          |         |          |   |         |          |         |   |         |          |          |   |         |          |          |   |         |          |          |   |         |          |          |   |         |          |         |   |         |          |         |   |         |          |         |   |         |         |         |   |          |          |         |   |          |          |         |   |          |          |         |   |          |          |         |   |          |          |         |   |          |          |         |   |          |          |         |   |          |          |         |   |          |          |         |   |          |          |          |                                                                                                                                                                                                                       |                                                                                                                                                                                                                                                                                                                                                                                                                                                                                                                                                                                                                                                                                                                                                                                                                                                                                                                                                                                                                                                                                                                                                                                                                                                                                                                                                                                                                                                                                                                                                                                                                                                                                                                                                                                                                                                                                                                                                                                                                                                                                                                                                                                                                                                                                                                                                                                                                                                                                                                                                                                                                                                                                                                                                                                                                                                                                                                                         |          |          |          |          |         |         |          |          |         |          |                                                                                                                                                                                                                         |                                                                                                                                                                                                                                                                                                                                                                                                                                                                                                                                                                                                                                                                                                                                                                                                                                                                                                                                                                                                                                                                                                                                                                                                                                                                                                                                                                                                                                                                                                                                                                                                                                                                                                                                                                                                                                                                                                                                                                                                                                                                                                                                                                                                                                                                                                                                                                                                                                                                                                                                                                                                                                                                                                                                                                                                                                                                                                                                                                                                                                                                                                                                                             |   |          |          |          |   |          |          |          |   |          |          |          |   |          |          |          |   |          |          |          |   |          |          |          |   |          |          |          |   |          |         |         |   |          |         |         |   |         |         |         |   |          |         |         |   |          |         |         |   |         |          |          |   |          |          |          |   |         |         |         |   |         |          |          |   |          |          |          |   |          |         |          |   |          |          |          |   |          |          |         |   |          |          |         |   |          |          |          |   |         |          |         |   |         |          |         |   |         |          |          |   |          |          |         |   |          |          |          |   |          |          |          |   |          |          |          |   |          |          |          |   |          |         |          |   |          |         |          |   |          |         |          |   |          |         |          |   |          |         |          |   |         |          |          |   |         |          |          |   |         |         |          |   |         |         |          |   |          |          |         |   |          |          |         |   |          |          |         |   |          |          |         |
| C                                                                                                                                                                                                                      | -0.74580                                                                                                                                                                                                                                                                                                                                                                                                                                                                                                                                                                                                                                                                                                                                                                                                                                                                                                                                                                                                                                                                                                                                                                                                                                                                                                                                                                                                                                                                                                                                                                                                                                                                                                                                                                                                                                                                                                                                                                                                                                                                                                                                                                                                                                                                                                                                                                                                                                                                                                                                                                                                                                                                                                                                                                                                                                                                                                                                                                                                                                                                                                                                                       | 0.34138  | -2.56225 |          |          |   |          |          |          |   |          |          |          |   |          |          |          |   |          |         |          |   |          |          |          |   |          |          |          |   |          |         |          |   |          |         |          |   |         |         |         |   |         |         |         |   |          |         |          |   |          |         |         |   |         |         |         |   |          |         |         |   |         |         |         |   |          |          |          |   |          |          |          |   |         |         |         |   |          |          |         |   |          |         |          |   |         |          |         |   |         |          |          |   |         |          |          |   |         |          |          |   |         |          |          |   |         |          |         |   |         |          |         |   |         |          |         |   |         |         |         |   |          |          |         |   |          |          |         |   |          |          |         |   |          |          |         |   |          |          |         |   |          |          |         |   |          |          |         |   |          |          |         |   |          |          |         |   |          |          |          |                                                                                                                                                                                                                       |                                                                                                                                                                                                                                                                                                                                                                                                                                                                                                                                                                                                                                                                                                                                                                                                                                                                                                                                                                                                                                                                                                                                                                                                                                                                                                                                                                                                                                                                                                                                                                                                                                                                                                                                                                                                                                                                                                                                                                                                                                                                                                                                                                                                                                                                                                                                                                                                                                                                                                                                                                                                                                                                                                                                                                                                                                                                                                                                         |          |          |          |          |         |         |          |          |         |          |                                                                                                                                                                                                                         |                                                                                                                                                                                                                                                                                                                                                                                                                                                                                                                                                                                                                                                                                                                                                                                                                                                                                                                                                                                                                                                                                                                                                                                                                                                                                                                                                                                                                                                                                                                                                                                                                                                                                                                                                                                                                                                                                                                                                                                                                                                                                                                                                                                                                                                                                                                                                                                                                                                                                                                                                                                                                                                                                                                                                                                                                                                                                                                                                                                                                                                                                                                                                             |   |          |          |          |   |          |          |          |   |          |          |          |   |          |          |          |   |          |          |          |   |          |          |          |   |          |          |          |   |          |         |         |   |          |         |         |   |         |         |         |   |          |         |         |   |          |         |         |   |         |          |          |   |          |          |          |   |         |         |         |   |         |          |          |   |          |          |          |   |          |         |          |   |          |          |          |   |          |          |         |   |          |          |         |   |          |          |          |   |         |          |         |   |         |          |         |   |         |          |          |   |          |          |         |   |          |          |          |   |          |          |          |   |          |          |          |   |          |          |          |   |          |         |          |   |          |         |          |   |          |         |          |   |          |         |          |   |          |         |          |   |         |          |          |   |         |          |          |   |         |         |          |   |         |         |          |   |          |          |         |   |          |          |         |   |          |          |         |   |          |          |         |
| C                                                                                                                                                                                                                      | -1.49035                                                                                                                                                                                                                                                                                                                                                                                                                                                                                                                                                                                                                                                                                                                                                                                                                                                                                                                                                                                                                                                                                                                                                                                                                                                                                                                                                                                                                                                                                                                                                                                                                                                                                                                                                                                                                                                                                                                                                                                                                                                                                                                                                                                                                                                                                                                                                                                                                                                                                                                                                                                                                                                                                                                                                                                                                                                                                                                                                                                                                                                                                                                                                       | -0.83234 | -0.58130 |          |          |   |          |          |          |   |          |          |          |   |          |          |          |   |          |         |          |   |          |          |          |   |          |          |          |   |          |         |          |   |          |         |          |   |         |         |         |   |         |         |         |   |          |         |          |   |          |         |         |   |         |         |         |   |          |         |         |   |         |         |         |   |          |          |          |   |          |          |          |   |         |         |         |   |          |          |         |   |          |         |          |   |         |          |         |   |         |          |          |   |         |          |          |   |         |          |          |   |         |          |          |   |         |          |         |   |         |          |         |   |         |          |         |   |         |         |         |   |          |          |         |   |          |          |         |   |          |          |         |   |          |          |         |   |          |          |         |   |          |          |         |   |          |          |         |   |          |          |         |   |          |          |         |   |          |          |          |                                                                                                                                                                                                                       |                                                                                                                                                                                                                                                                                                                                                                                                                                                                                                                                                                                                                                                                                                                                                                                                                                                                                                                                                                                                                                                                                                                                                                                                                                                                                                                                                                                                                                                                                                                                                                                                                                                                                                                                                                                                                                                                                                                                                                                                                                                                                                                                                                                                                                                                                                                                                                                                                                                                                                                                                                                                                                                                                                                                                                                                                                                                                                                                         |          |          |          |          |         |         |          |          |         |          |                                                                                                                                                                                                                         |                                                                                                                                                                                                                                                                                                                                                                                                                                                                                                                                                                                                                                                                                                                                                                                                                                                                                                                                                                                                                                                                                                                                                                                                                                                                                                                                                                                                                                                                                                                                                                                                                                                                                                                                                                                                                                                                                                                                                                                                                                                                                                                                                                                                                                                                                                                                                                                                                                                                                                                                                                                                                                                                                                                                                                                                                                                                                                                                                                                                                                                                                                                                                             |   |          |          |          |   |          |          |          |   |          |          |          |   |          |          |          |   |          |          |          |   |          |          |          |   |          |          |          |   |          |         |         |   |          |         |         |   |         |         |         |   |          |         |         |   |          |         |         |   |         |          |          |   |          |          |          |   |         |         |         |   |         |          |          |   |          |          |          |   |          |         |          |   |          |          |          |   |          |          |         |   |          |          |         |   |          |          |          |   |         |          |         |   |         |          |         |   |         |          |          |   |          |          |         |   |          |          |          |   |          |          |          |   |          |          |          |   |          |          |          |   |          |         |          |   |          |         |          |   |          |         |          |   |          |         |          |   |          |         |          |   |         |          |          |   |         |          |          |   |         |         |          |   |         |         |          |   |          |          |         |   |          |          |         |   |          |          |         |   |          |          |         |
| H                                                                                                                                                                                                                      | -2.71807                                                                                                                                                                                                                                                                                                                                                                                                                                                                                                                                                                                                                                                                                                                                                                                                                                                                                                                                                                                                                                                                                                                                                                                                                                                                                                                                                                                                                                                                                                                                                                                                                                                                                                                                                                                                                                                                                                                                                                                                                                                                                                                                                                                                                                                                                                                                                                                                                                                                                                                                                                                                                                                                                                                                                                                                                                                                                                                                                                                                                                                                                                                                                       | -2.54582 | -0.97084 |          |          |   |          |          |          |   |          |          |          |   |          |          |          |   |          |         |          |   |          |          |          |   |          |          |          |   |          |         |          |   |          |         |          |   |         |         |         |   |         |         |         |   |          |         |          |   |          |         |         |   |         |         |         |   |          |         |         |   |         |         |         |   |          |          |          |   |          |          |          |   |         |         |         |   |          |          |         |   |          |         |          |   |         |          |         |   |         |          |          |   |         |          |          |   |         |          |          |   |         |          |          |   |         |          |         |   |         |          |         |   |         |          |         |   |         |         |         |   |          |          |         |   |          |          |         |   |          |          |         |   |          |          |         |   |          |          |         |   |          |          |         |   |          |          |         |   |          |          |         |   |          |          |         |   |          |          |          |                                                                                                                                                                                                                       |                                                                                                                                                                                                                                                                                                                                                                                                                                                                                                                                                                                                                                                                                                                                                                                                                                                                                                                                                                                                                                                                                                                                                                                                                                                                                                                                                                                                                                                                                                                                                                                                                                                                                                                                                                                                                                                                                                                                                                                                                                                                                                                                                                                                                                                                                                                                                                                                                                                                                                                                                                                                                                                                                                                                                                                                                                                                                                                                         |          |          |          |          |         |         |          |          |         |          |                                                                                                                                                                                                                         |                                                                                                                                                                                                                                                                                                                                                                                                                                                                                                                                                                                                                                                                                                                                                                                                                                                                                                                                                                                                                                                                                                                                                                                                                                                                                                                                                                                                                                                                                                                                                                                                                                                                                                                                                                                                                                                                                                                                                                                                                                                                                                                                                                                                                                                                                                                                                                                                                                                                                                                                                                                                                                                                                                                                                                                                                                                                                                                                                                                                                                                                                                                                                             |   |          |          |          |   |          |          |          |   |          |          |          |   |          |          |          |   |          |          |          |   |          |          |          |   |          |          |          |   |          |         |         |   |          |         |         |   |         |         |         |   |          |         |         |   |          |         |         |   |         |          |          |   |          |          |          |   |         |         |         |   |         |          |          |   |          |          |          |   |          |         |          |   |          |          |          |   |          |          |         |   |          |          |         |   |          |          |          |   |         |          |         |   |         |          |         |   |         |          |          |   |          |          |         |   |          |          |          |   |          |          |          |   |          |          |          |   |          |          |          |   |          |         |          |   |          |         |          |   |          |         |          |   |          |         |          |   |          |         |          |   |         |          |          |   |         |          |          |   |         |         |          |   |         |         |          |   |          |          |         |   |          |          |         |   |          |          |         |   |          |          |         |
| H                                                                                                                                                                                                                      | -0.18951                                                                                                                                                                                                                                                                                                                                                                                                                                                                                                                                                                                                                                                                                                                                                                                                                                                                                                                                                                                                                                                                                                                                                                                                                                                                                                                                                                                                                                                                                                                                                                                                                                                                                                                                                                                                                                                                                                                                                                                                                                                                                                                                                                                                                                                                                                                                                                                                                                                                                                                                                                                                                                                                                                                                                                                                                                                                                                                                                                                                                                                                                                                                                       | 1.15932  | -3.00256 |          |          |   |          |          |          |   |          |          |          |   |          |          |          |   |          |         |          |   |          |          |          |   |          |          |          |   |          |         |          |   |          |         |          |   |         |         |         |   |         |         |         |   |          |         |          |   |          |         |         |   |         |         |         |   |          |         |         |   |         |         |         |   |          |          |          |   |          |          |          |   |         |         |         |   |          |          |         |   |          |         |          |   |         |          |         |   |         |          |          |   |         |          |          |   |         |          |          |   |         |          |          |   |         |          |         |   |         |          |         |   |         |          |         |   |         |         |         |   |          |          |         |   |          |          |         |   |          |          |         |   |          |          |         |   |          |          |         |   |          |          |         |   |          |          |         |   |          |          |         |   |          |          |         |   |          |          |          |                                                                                                                                                                                                                       |                                                                                                                                                                                                                                                                                                                                                                                                                                                                                                                                                                                                                                                                                                                                                                                                                                                                                                                                                                                                                                                                                                                                                                                                                                                                                                                                                                                                                                                                                                                                                                                                                                                                                                                                                                                                                                                                                                                                                                                                                                                                                                                                                                                                                                                                                                                                                                                                                                                                                                                                                                                                                                                                                                                                                                                                                                                                                                                                         |          |          |          |          |         |         |          |          |         |          |                                                                                                                                                                                                                         |                                                                                                                                                                                                                                                                                                                                                                                                                                                                                                                                                                                                                                                                                                                                                                                                                                                                                                                                                                                                                                                                                                                                                                                                                                                                                                                                                                                                                                                                                                                                                                                                                                                                                                                                                                                                                                                                                                                                                                                                                                                                                                                                                                                                                                                                                                                                                                                                                                                                                                                                                                                                                                                                                                                                                                                                                                                                                                                                                                                                                                                                                                                                                             |   |          |          |          |   |          |          |          |   |          |          |          |   |          |          |          |   |          |          |          |   |          |          |          |   |          |          |          |   |          |         |         |   |          |         |         |   |         |         |         |   |          |         |         |   |          |         |         |   |         |          |          |   |          |          |          |   |         |         |         |   |         |          |          |   |          |          |          |   |          |         |          |   |          |          |          |   |          |          |         |   |          |          |         |   |          |          |          |   |         |          |         |   |         |          |         |   |         |          |          |   |          |          |         |   |          |          |          |   |          |          |          |   |          |          |          |   |          |          |          |   |          |         |          |   |          |         |          |   |          |         |          |   |          |         |          |   |          |         |          |   |         |          |          |   |         |          |          |   |         |         |          |   |         |         |          |   |          |          |         |   |          |          |         |   |          |          |         |   |          |          |         |
| C                                                                                                                                                                                                                      | -0.09856                                                                                                                                                                                                                                                                                                                                                                                                                                                                                                                                                                                                                                                                                                                                                                                                                                                                                                                                                                                                                                                                                                                                                                                                                                                                                                                                                                                                                                                                                                                                                                                                                                                                                                                                                                                                                                                                                                                                                                                                                                                                                                                                                                                                                                                                                                                                                                                                                                                                                                                                                                                                                                                                                                                                                                                                                                                                                                                                                                                                                                                                                                                                                       | 1.26602  | -0.34724 |          |          |   |          |          |          |   |          |          |          |   |          |          |          |   |          |         |          |   |          |          |          |   |          |          |          |   |          |         |          |   |          |         |          |   |         |         |         |   |         |         |         |   |          |         |          |   |          |         |         |   |         |         |         |   |          |         |         |   |         |         |         |   |          |          |          |   |          |          |          |   |         |         |         |   |          |          |         |   |          |         |          |   |         |          |         |   |         |          |          |   |         |          |          |   |         |          |          |   |         |          |          |   |         |          |         |   |         |          |         |   |         |          |         |   |         |         |         |   |          |          |         |   |          |          |         |   |          |          |         |   |          |          |         |   |          |          |         |   |          |          |         |   |          |          |         |   |          |          |         |   |          |          |         |   |          |          |          |                                                                                                                                                                                                                       |                                                                                                                                                                                                                                                                                                                                                                                                                                                                                                                                                                                                                                                                                                                                                                                                                                                                                                                                                                                                                                                                                                                                                                                                                                                                                                                                                                                                                                                                                                                                                                                                                                                                                                                                                                                                                                                                                                                                                                                                                                                                                                                                                                                                                                                                                                                                                                                                                                                                                                                                                                                                                                                                                                                                                                                                                                                                                                                                         |          |          |          |          |         |         |          |          |         |          |                                                                                                                                                                                                                         |                                                                                                                                                                                                                                                                                                                                                                                                                                                                                                                                                                                                                                                                                                                                                                                                                                                                                                                                                                                                                                                                                                                                                                                                                                                                                                                                                                                                                                                                                                                                                                                                                                                                                                                                                                                                                                                                                                                                                                                                                                                                                                                                                                                                                                                                                                                                                                                                                                                                                                                                                                                                                                                                                                                                                                                                                                                                                                                                                                                                                                                                                                                                                             |   |          |          |          |   |          |          |          |   |          |          |          |   |          |          |          |   |          |          |          |   |          |          |          |   |          |          |          |   |          |         |         |   |          |         |         |   |         |         |         |   |          |         |         |   |          |         |         |   |         |          |          |   |          |          |          |   |         |         |         |   |         |          |          |   |          |          |          |   |          |         |          |   |          |          |          |   |          |          |         |   |          |          |         |   |          |          |          |   |         |          |         |   |         |          |         |   |         |          |          |   |          |          |         |   |          |          |          |   |          |          |          |   |          |          |          |   |          |          |          |   |          |         |          |   |          |         |          |   |          |         |          |   |          |         |          |   |          |         |          |   |         |          |          |   |         |          |          |   |         |         |          |   |         |         |          |   |          |          |         |   |          |          |         |   |          |          |         |   |          |          |         |
| C                                                                                                                                                                                                                      | 0.83083                                                                                                                                                                                                                                                                                                                                                                                                                                                                                                                                                                                                                                                                                                                                                                                                                                                                                                                                                                                                                                                                                                                                                                                                                                                                                                                                                                                                                                                                                                                                                                                                                                                                                                                                                                                                                                                                                                                                                                                                                                                                                                                                                                                                                                                                                                                                                                                                                                                                                                                                                                                                                                                                                                                                                                                                                                                                                                                                                                                                                                                                                                                                                        | 3.41534  | 1.19241  |          |          |   |          |          |          |   |          |          |          |   |          |          |          |   |          |         |          |   |          |          |          |   |          |          |          |   |          |         |          |   |          |         |          |   |         |         |         |   |         |         |         |   |          |         |          |   |          |         |         |   |         |         |         |   |          |         |         |   |         |         |         |   |          |          |          |   |          |          |          |   |         |         |         |   |          |          |         |   |          |         |          |   |         |          |         |   |         |          |          |   |         |          |          |   |         |          |          |   |         |          |          |   |         |          |         |   |         |          |         |   |         |          |         |   |         |         |         |   |          |          |         |   |          |          |         |   |          |          |         |   |          |          |         |   |          |          |         |   |          |          |         |   |          |          |         |   |          |          |         |   |          |          |         |   |          |          |          |                                                                                                                                                                                                                       |                                                                                                                                                                                                                                                                                                                                                                                                                                                                                                                                                                                                                                                                                                                                                                                                                                                                                                                                                                                                                                                                                                                                                                                                                                                                                                                                                                                                                                                                                                                                                                                                                                                                                                                                                                                                                                                                                                                                                                                                                                                                                                                                                                                                                                                                                                                                                                                                                                                                                                                                                                                                                                                                                                                                                                                                                                                                                                                                         |          |          |          |          |         |         |          |          |         |          |                                                                                                                                                                                                                         |                                                                                                                                                                                                                                                                                                                                                                                                                                                                                                                                                                                                                                                                                                                                                                                                                                                                                                                                                                                                                                                                                                                                                                                                                                                                                                                                                                                                                                                                                                                                                                                                                                                                                                                                                                                                                                                                                                                                                                                                                                                                                                                                                                                                                                                                                                                                                                                                                                                                                                                                                                                                                                                                                                                                                                                                                                                                                                                                                                                                                                                                                                                                                             |   |          |          |          |   |          |          |          |   |          |          |          |   |          |          |          |   |          |          |          |   |          |          |          |   |          |          |          |   |          |         |         |   |          |         |         |   |         |         |         |   |          |         |         |   |          |         |         |   |         |          |          |   |          |          |          |   |         |         |         |   |         |          |          |   |          |          |          |   |          |         |          |   |          |          |          |   |          |          |         |   |          |          |         |   |          |          |          |   |         |          |         |   |         |          |         |   |         |          |          |   |          |          |         |   |          |          |          |   |          |          |          |   |          |          |          |   |          |          |          |   |          |         |          |   |          |         |          |   |          |         |          |   |          |         |          |   |          |         |          |   |         |          |          |   |         |          |          |   |         |         |          |   |         |         |          |   |          |          |         |   |          |          |         |   |          |          |         |   |          |          |         |
| C                                                                                                                                                                                                                      | 1.14665                                                                                                                                                                                                                                                                                                                                                                                                                                                                                                                                                                                                                                                                                                                                                                                                                                                                                                                                                                                                                                                                                                                                                                                                                                                                                                                                                                                                                                                                                                                                                                                                                                                                                                                                                                                                                                                                                                                                                                                                                                                                                                                                                                                                                                                                                                                                                                                                                                                                                                                                                                                                                                                                                                                                                                                                                                                                                                                                                                                                                                                                                                                                                        | 1.15143  | 0.29966  |          |          |   |          |          |          |   |          |          |          |   |          |          |          |   |          |         |          |   |          |          |          |   |          |          |          |   |          |         |          |   |          |         |          |   |         |         |         |   |         |         |         |   |          |         |          |   |          |         |         |   |         |         |         |   |          |         |         |   |         |         |         |   |          |          |          |   |          |          |          |   |         |         |         |   |          |          |         |   |          |         |          |   |         |          |         |   |         |          |          |   |         |          |          |   |         |          |          |   |         |          |          |   |         |          |         |   |         |          |         |   |         |          |         |   |         |         |         |   |          |          |         |   |          |          |         |   |          |          |         |   |          |          |         |   |          |          |         |   |          |          |         |   |          |          |         |   |          |          |         |   |          |          |         |   |          |          |          |                                                                                                                                                                                                                       |                                                                                                                                                                                                                                                                                                                                                                                                                                                                                                                                                                                                                                                                                                                                                                                                                                                                                                                                                                                                                                                                                                                                                                                                                                                                                                                                                                                                                                                                                                                                                                                                                                                                                                                                                                                                                                                                                                                                                                                                                                                                                                                                                                                                                                                                                                                                                                                                                                                                                                                                                                                                                                                                                                                                                                                                                                                                                                                                         |          |          |          |          |         |         |          |          |         |          |                                                                                                                                                                                                                         |                                                                                                                                                                                                                                                                                                                                                                                                                                                                                                                                                                                                                                                                                                                                                                                                                                                                                                                                                                                                                                                                                                                                                                                                                                                                                                                                                                                                                                                                                                                                                                                                                                                                                                                                                                                                                                                                                                                                                                                                                                                                                                                                                                                                                                                                                                                                                                                                                                                                                                                                                                                                                                                                                                                                                                                                                                                                                                                                                                                                                                                                                                                                                             |   |          |          |          |   |          |          |          |   |          |          |          |   |          |          |          |   |          |          |          |   |          |          |          |   |          |          |          |   |          |         |         |   |          |         |         |   |         |         |         |   |          |         |         |   |          |         |         |   |         |          |          |   |          |          |          |   |         |         |         |   |         |          |          |   |          |          |          |   |          |         |          |   |          |          |          |   |          |          |         |   |          |          |         |   |          |          |          |   |         |          |         |   |         |          |         |   |         |          |          |   |          |          |         |   |          |          |          |   |          |          |          |   |          |          |          |   |          |          |          |   |          |         |          |   |          |         |          |   |          |         |          |   |          |         |          |   |          |         |          |   |         |          |          |   |         |          |          |   |         |         |          |   |         |         |          |   |          |          |         |   |          |          |         |   |          |          |         |   |          |          |         |
| C                                                                                                                                                                                                                      | -0.83342                                                                                                                                                                                                                                                                                                                                                                                                                                                                                                                                                                                                                                                                                                                                                                                                                                                                                                                                                                                                                                                                                                                                                                                                                                                                                                                                                                                                                                                                                                                                                                                                                                                                                                                                                                                                                                                                                                                                                                                                                                                                                                                                                                                                                                                                                                                                                                                                                                                                                                                                                                                                                                                                                                                                                                                                                                                                                                                                                                                                                                                                                                                                                       | 2.45574  | -0.22277 |          |          |   |          |          |          |   |          |          |          |   |          |          |          |   |          |         |          |   |          |          |          |   |          |          |          |   |          |         |          |   |          |         |          |   |         |         |         |   |         |         |         |   |          |         |          |   |          |         |         |   |         |         |         |   |          |         |         |   |         |         |         |   |          |          |          |   |          |          |          |   |         |         |         |   |          |          |         |   |          |         |          |   |         |          |         |   |         |          |          |   |         |          |          |   |         |          |          |   |         |          |          |   |         |          |         |   |         |          |         |   |         |          |         |   |         |         |         |   |          |          |         |   |          |          |         |   |          |          |         |   |          |          |         |   |          |          |         |   |          |          |         |   |          |          |         |   |          |          |         |   |          |          |         |   |          |          |          |                                                                                                                                                                                                                       |                                                                                                                                                                                                                                                                                                                                                                                                                                                                                                                                                                                                                                                                                                                                                                                                                                                                                                                                                                                                                                                                                                                                                                                                                                                                                                                                                                                                                                                                                                                                                                                                                                                                                                                                                                                                                                                                                                                                                                                                                                                                                                                                                                                                                                                                                                                                                                                                                                                                                                                                                                                                                                                                                                                                                                                                                                                                                                                                         |          |          |          |          |         |         |          |          |         |          |                                                                                                                                                                                                                         |                                                                                                                                                                                                                                                                                                                                                                                                                                                                                                                                                                                                                                                                                                                                                                                                                                                                                                                                                                                                                                                                                                                                                                                                                                                                                                                                                                                                                                                                                                                                                                                                                                                                                                                                                                                                                                                                                                                                                                                                                                                                                                                                                                                                                                                                                                                                                                                                                                                                                                                                                                                                                                                                                                                                                                                                                                                                                                                                                                                                                                                                                                                                                             |   |          |          |          |   |          |          |          |   |          |          |          |   |          |          |          |   |          |          |          |   |          |          |          |   |          |          |          |   |          |         |         |   |          |         |         |   |         |         |         |   |          |         |         |   |          |         |         |   |         |          |          |   |          |          |          |   |         |         |         |   |         |          |          |   |          |          |          |   |          |         |          |   |          |          |          |   |          |          |         |   |          |          |         |   |          |          |          |   |         |          |         |   |         |          |         |   |         |          |          |   |          |          |         |   |          |          |          |   |          |          |          |   |          |          |          |   |          |          |          |   |          |         |          |   |          |         |          |   |          |         |          |   |          |         |          |   |          |         |          |   |         |          |          |   |         |          |          |   |         |         |          |   |         |         |          |   |          |          |         |   |          |          |         |   |          |          |         |   |          |          |         |
| C                                                                                                                                                                                                                      | -0.38646                                                                                                                                                                                                                                                                                                                                                                                                                                                                                                                                                                                                                                                                                                                                                                                                                                                                                                                                                                                                                                                                                                                                                                                                                                                                                                                                                                                                                                                                                                                                                                                                                                                                                                                                                                                                                                                                                                                                                                                                                                                                                                                                                                                                                                                                                                                                                                                                                                                                                                                                                                                                                                                                                                                                                                                                                                                                                                                                                                                                                                                                                                                                                       | 3.52705  | 0.53143  |          |          |   |          |          |          |   |          |          |          |   |          |          |          |   |          |         |          |   |          |          |          |   |          |          |          |   |          |         |          |   |          |         |          |   |         |         |         |   |         |         |         |   |          |         |          |   |          |         |         |   |         |         |         |   |          |         |         |   |         |         |         |   |          |          |          |   |          |          |          |   |         |         |         |   |          |          |         |   |          |         |          |   |         |          |         |   |         |          |          |   |         |          |          |   |         |          |          |   |         |          |          |   |         |          |         |   |         |          |         |   |         |          |         |   |         |         |         |   |          |          |         |   |          |          |         |   |          |          |         |   |          |          |         |   |          |          |         |   |          |          |         |   |          |          |         |   |          |          |         |   |          |          |         |   |          |          |          |                                                                                                                                                                                                                       |                                                                                                                                                                                                                                                                                                                                                                                                                                                                                                                                                                                                                                                                                                                                                                                                                                                                                                                                                                                                                                                                                                                                                                                                                                                                                                                                                                                                                                                                                                                                                                                                                                                                                                                                                                                                                                                                                                                                                                                                                                                                                                                                                                                                                                                                                                                                                                                                                                                                                                                                                                                                                                                                                                                                                                                                                                                                                                                                         |          |          |          |          |         |         |          |          |         |          |                                                                                                                                                                                                                         |                                                                                                                                                                                                                                                                                                                                                                                                                                                                                                                                                                                                                                                                                                                                                                                                                                                                                                                                                                                                                                                                                                                                                                                                                                                                                                                                                                                                                                                                                                                                                                                                                                                                                                                                                                                                                                                                                                                                                                                                                                                                                                                                                                                                                                                                                                                                                                                                                                                                                                                                                                                                                                                                                                                                                                                                                                                                                                                                                                                                                                                                                                                                                             |   |          |          |          |   |          |          |          |   |          |          |          |   |          |          |          |   |          |          |          |   |          |          |          |   |          |          |          |   |          |         |         |   |          |         |         |   |         |         |         |   |          |         |         |   |          |         |         |   |         |          |          |   |          |          |          |   |         |         |         |   |         |          |          |   |          |          |          |   |          |         |          |   |          |          |          |   |          |          |         |   |          |          |         |   |          |          |          |   |         |          |         |   |         |          |         |   |         |          |          |   |          |          |         |   |          |          |          |   |          |          |          |   |          |          |          |   |          |          |          |   |          |         |          |   |          |         |          |   |          |         |          |   |          |         |          |   |          |         |          |   |         |          |          |   |         |          |          |   |         |         |          |   |         |         |          |   |          |          |         |   |          |          |         |   |          |          |         |   |          |          |         |
| C                                                                                                                                                                                                                      | 1.56832                                                                                                                                                                                                                                                                                                                                                                                                                                                                                                                                                                                                                                                                                                                                                                                                                                                                                                                                                                                                                                                                                                                                                                                                                                                                                                                                                                                                                                                                                                                                                                                                                                                                                                                                                                                                                                                                                                                                                                                                                                                                                                                                                                                                                                                                                                                                                                                                                                                                                                                                                                                                                                                                                                                                                                                                                                                                                                                                                                                                                                                                                                                                                        | 2.25010  | 1.06712  |          |          |   |          |          |          |   |          |          |          |   |          |          |          |   |          |         |          |   |          |          |          |   |          |          |          |   |          |         |          |   |          |         |          |   |         |         |         |   |         |         |         |   |          |         |          |   |          |         |         |   |         |         |         |   |          |         |         |   |         |         |         |   |          |          |          |   |          |          |          |   |         |         |         |   |          |          |         |   |          |         |          |   |         |          |         |   |         |          |          |   |         |          |          |   |         |          |          |   |         |          |          |   |         |          |         |   |         |          |         |   |         |          |         |   |         |         |         |   |          |          |         |   |          |          |         |   |          |          |         |   |          |          |         |   |          |          |         |   |          |          |         |   |          |          |         |   |          |          |         |   |          |          |         |   |          |          |          |                                                                                                                                                                                                                       |                                                                                                                                                                                                                                                                                                                                                                                                                                                                                                                                                                                                                                                                                                                                                                                                                                                                                                                                                                                                                                                                                                                                                                                                                                                                                                                                                                                                                                                                                                                                                                                                                                                                                                                                                                                                                                                                                                                                                                                                                                                                                                                                                                                                                                                                                                                                                                                                                                                                                                                                                                                                                                                                                                                                                                                                                                                                                                                                         |          |          |          |          |         |         |          |          |         |          |                                                                                                                                                                                                                         |                                                                                                                                                                                                                                                                                                                                                                                                                                                                                                                                                                                                                                                                                                                                                                                                                                                                                                                                                                                                                                                                                                                                                                                                                                                                                                                                                                                                                                                                                                                                                                                                                                                                                                                                                                                                                                                                                                                                                                                                                                                                                                                                                                                                                                                                                                                                                                                                                                                                                                                                                                                                                                                                                                                                                                                                                                                                                                                                                                                                                                                                                                                                                             |   |          |          |          |   |          |          |          |   |          |          |          |   |          |          |          |   |          |          |          |   |          |          |          |   |          |          |          |   |          |         |         |   |          |         |         |   |         |         |         |   |          |         |         |   |          |         |         |   |         |          |          |   |          |          |          |   |         |         |         |   |         |          |          |   |          |          |          |   |          |         |          |   |          |          |          |   |          |          |         |   |          |          |         |   |          |          |          |   |         |          |         |   |         |          |         |   |         |          |          |   |          |          |         |   |          |          |          |   |          |          |          |   |          |          |          |   |          |          |          |   |          |         |          |   |          |         |          |   |          |         |          |   |          |         |          |   |          |         |          |   |         |          |          |   |         |          |          |   |         |         |          |   |         |         |          |   |          |          |         |   |          |          |         |   |          |          |         |   |          |          |         |
| H                                                                                                                                                                                                                      | -0.98035                                                                                                                                                                                                                                                                                                                                                                                                                                                                                                                                                                                                                                                                                                                                                                                                                                                                                                                                                                                                                                                                                                                                                                                                                                                                                                                                                                                                                                                                                                                                                                                                                                                                                                                                                                                                                                                                                                                                                                                                                                                                                                                                                                                                                                                                                                                                                                                                                                                                                                                                                                                                                                                                                                                                                                                                                                                                                                                                                                                                                                                                                                                                                       | 4.42861  | 0.60674  |          |          |   |          |          |          |   |          |          |          |   |          |          |          |   |          |         |          |   |          |          |          |   |          |          |          |   |          |         |          |   |          |         |          |   |         |         |         |   |         |         |         |   |          |         |          |   |          |         |         |   |         |         |         |   |          |         |         |   |         |         |         |   |          |          |          |   |          |          |          |   |         |         |         |   |          |          |         |   |          |         |          |   |         |          |         |   |         |          |          |   |         |          |          |   |         |          |          |   |         |          |          |   |         |          |         |   |         |          |         |   |         |          |         |   |         |         |         |   |          |          |         |   |          |          |         |   |          |          |         |   |          |          |         |   |          |          |         |   |          |          |         |   |          |          |         |   |          |          |         |   |          |          |         |   |          |          |          |                                                                                                                                                                                                                       |                                                                                                                                                                                                                                                                                                                                                                                                                                                                                                                                                                                                                                                                                                                                                                                                                                                                                                                                                                                                                                                                                                                                                                                                                                                                                                                                                                                                                                                                                                                                                                                                                                                                                                                                                                                                                                                                                                                                                                                                                                                                                                                                                                                                                                                                                                                                                                                                                                                                                                                                                                                                                                                                                                                                                                                                                                                                                                                                         |          |          |          |          |         |         |          |          |         |          |                                                                                                                                                                                                                         |                                                                                                                                                                                                                                                                                                                                                                                                                                                                                                                                                                                                                                                                                                                                                                                                                                                                                                                                                                                                                                                                                                                                                                                                                                                                                                                                                                                                                                                                                                                                                                                                                                                                                                                                                                                                                                                                                                                                                                                                                                                                                                                                                                                                                                                                                                                                                                                                                                                                                                                                                                                                                                                                                                                                                                                                                                                                                                                                                                                                                                                                                                                                                             |   |          |          |          |   |          |          |          |   |          |          |          |   |          |          |          |   |          |          |          |   |          |          |          |   |          |          |          |   |          |         |         |   |          |         |         |   |         |         |         |   |          |         |         |   |          |         |         |   |         |          |          |   |          |          |          |   |         |         |         |   |         |          |          |   |          |          |          |   |          |         |          |   |          |          |          |   |          |          |         |   |          |          |         |   |          |          |          |   |         |          |         |   |         |          |         |   |         |          |          |   |          |          |         |   |          |          |          |   |          |          |          |   |          |          |          |   |          |          |          |   |          |         |          |   |          |         |          |   |          |         |          |   |          |         |          |   |          |         |          |   |         |          |          |   |         |          |          |   |         |         |          |   |         |         |          |   |          |          |         |   |          |          |         |   |          |          |         |   |          |          |         |
| H                                                                                                                                                                                                                      | 2.51475                                                                                                                                                                                                                                                                                                                                                                                                                                                                                                                                                                                                                                                                                                                                                                                                                                                                                                                                                                                                                                                                                                                                                                                                                                                                                                                                                                                                                                                                                                                                                                                                                                                                                                                                                                                                                                                                                                                                                                                                                                                                                                                                                                                                                                                                                                                                                                                                                                                                                                                                                                                                                                                                                                                                                                                                                                                                                                                                                                                                                                                                                                                                                        | 2.18909  | 1.58519  |          |          |   |          |          |          |   |          |          |          |   |          |          |          |   |          |         |          |   |          |          |          |   |          |          |          |   |          |         |          |   |          |         |          |   |         |         |         |   |         |         |         |   |          |         |          |   |          |         |         |   |         |         |         |   |          |         |         |   |         |         |         |   |          |          |          |   |          |          |          |   |         |         |         |   |          |          |         |   |          |         |          |   |         |          |         |   |         |          |          |   |         |          |          |   |         |          |          |   |         |          |          |   |         |          |         |   |         |          |         |   |         |          |         |   |         |         |         |   |          |          |         |   |          |          |         |   |          |          |         |   |          |          |         |   |          |          |         |   |          |          |         |   |          |          |         |   |          |          |         |   |          |          |         |   |          |          |          |                                                                                                                                                                                                                       |                                                                                                                                                                                                                                                                                                                                                                                                                                                                                                                                                                                                                                                                                                                                                                                                                                                                                                                                                                                                                                                                                                                                                                                                                                                                                                                                                                                                                                                                                                                                                                                                                                                                                                                                                                                                                                                                                                                                                                                                                                                                                                                                                                                                                                                                                                                                                                                                                                                                                                                                                                                                                                                                                                                                                                                                                                                                                                                                         |          |          |          |          |         |         |          |          |         |          |                                                                                                                                                                                                                         |                                                                                                                                                                                                                                                                                                                                                                                                                                                                                                                                                                                                                                                                                                                                                                                                                                                                                                                                                                                                                                                                                                                                                                                                                                                                                                                                                                                                                                                                                                                                                                                                                                                                                                                                                                                                                                                                                                                                                                                                                                                                                                                                                                                                                                                                                                                                                                                                                                                                                                                                                                                                                                                                                                                                                                                                                                                                                                                                                                                                                                                                                                                                                             |   |          |          |          |   |          |          |          |   |          |          |          |   |          |          |          |   |          |          |          |   |          |          |          |   |          |          |          |   |          |         |         |   |          |         |         |   |         |         |         |   |          |         |         |   |          |         |         |   |         |          |          |   |          |          |          |   |         |         |         |   |         |          |          |   |          |          |          |   |          |         |          |   |          |          |          |   |          |          |         |   |          |          |         |   |          |          |          |   |         |          |         |   |         |          |         |   |         |          |          |   |          |          |         |   |          |          |          |   |          |          |          |   |          |          |          |   |          |          |          |   |          |         |          |   |          |         |          |   |          |         |          |   |          |         |          |   |          |         |          |   |         |          |          |   |         |          |          |   |         |         |          |   |         |         |          |   |          |          |         |   |          |          |         |   |          |          |         |   |          |          |         |
| H                                                                                                                                                                                                                      | -1.37189                                                                                                                                                                                                                                                                                                                                                                                                                                                                                                                                                                                                                                                                                                                                                                                                                                                                                                                                                                                                                                                                                                                                                                                                                                                                                                                                                                                                                                                                                                                                                                                                                                                                                                                                                                                                                                                                                                                                                                                                                                                                                                                                                                                                                                                                                                                                                                                                                                                                                                                                                                                                                                                                                                                                                                                                                                                                                                                                                                                                                                                                                                                                                       | -0.46017 | -4.45389 |          |          |   |          |          |          |   |          |          |          |   |          |          |          |   |          |         |          |   |          |          |          |   |          |          |          |   |          |         |          |   |          |         |          |   |         |         |         |   |         |         |         |   |          |         |          |   |          |         |         |   |         |         |         |   |          |         |         |   |         |         |         |   |          |          |          |   |          |          |          |   |         |         |         |   |          |          |         |   |          |         |          |   |         |          |         |   |         |          |          |   |         |          |          |   |         |          |          |   |         |          |          |   |         |          |         |   |         |          |         |   |         |          |         |   |         |         |         |   |          |          |         |   |          |          |         |   |          |          |         |   |          |          |         |   |          |          |         |   |          |          |         |   |          |          |         |   |          |          |         |   |          |          |         |   |          |          |          |                                                                                                                                                                                                                       |                                                                                                                                                                                                                                                                                                                                                                                                                                                                                                                                                                                                                                                                                                                                                                                                                                                                                                                                                                                                                                                                                                                                                                                                                                                                                                                                                                                                                                                                                                                                                                                                                                                                                                                                                                                                                                                                                                                                                                                                                                                                                                                                                                                                                                                                                                                                                                                                                                                                                                                                                                                                                                                                                                                                                                                                                                                                                                                                         |          |          |          |          |         |         |          |          |         |          |                                                                                                                                                                                                                         |                                                                                                                                                                                                                                                                                                                                                                                                                                                                                                                                                                                                                                                                                                                                                                                                                                                                                                                                                                                                                                                                                                                                                                                                                                                                                                                                                                                                                                                                                                                                                                                                                                                                                                                                                                                                                                                                                                                                                                                                                                                                                                                                                                                                                                                                                                                                                                                                                                                                                                                                                                                                                                                                                                                                                                                                                                                                                                                                                                                                                                                                                                                                                             |   |          |          |          |   |          |          |          |   |          |          |          |   |          |          |          |   |          |          |          |   |          |          |          |   |          |          |          |   |          |         |         |   |          |         |         |   |         |         |         |   |          |         |         |   |          |         |         |   |         |          |          |   |          |          |          |   |         |         |         |   |         |          |          |   |          |          |          |   |          |         |          |   |          |          |          |   |          |          |         |   |          |          |         |   |          |          |          |   |         |          |         |   |         |          |         |   |         |          |          |   |          |          |         |   |          |          |          |   |          |          |          |   |          |          |          |   |          |          |          |   |          |         |          |   |          |         |          |   |          |         |          |   |          |         |          |   |          |         |          |   |         |          |          |   |         |          |          |   |         |         |          |   |         |         |          |   |          |          |         |   |          |          |         |   |          |          |         |   |          |          |         |
| H                                                                                                                                                                                                                      | -2.64624                                                                                                                                                                                                                                                                                                                                                                                                                                                                                                                                                                                                                                                                                                                                                                                                                                                                                                                                                                                                                                                                                                                                                                                                                                                                                                                                                                                                                                                                                                                                                                                                                                                                                                                                                                                                                                                                                                                                                                                                                                                                                                                                                                                                                                                                                                                                                                                                                                                                                                                                                                                                                                                                                                                                                                                                                                                                                                                                                                                                                                                                                                                                                       | -2.32610 | -3.41601 |          |          |   |          |          |          |   |          |          |          |   |          |          |          |   |          |         |          |   |          |          |          |   |          |          |          |   |          |         |          |   |          |         |          |   |         |         |         |   |         |         |         |   |          |         |          |   |          |         |         |   |         |         |         |   |          |         |         |   |         |         |         |   |          |          |          |   |          |          |          |   |         |         |         |   |          |          |         |   |          |         |          |   |         |          |         |   |         |          |          |   |         |          |          |   |         |          |          |   |         |          |          |   |         |          |         |   |         |          |         |   |         |          |         |   |         |         |         |   |          |          |         |   |          |          |         |   |          |          |         |   |          |          |         |   |          |          |         |   |          |          |         |   |          |          |         |   |          |          |         |   |          |          |         |   |          |          |          |                                                                                                                                                                                                                       |                                                                                                                                                                                                                                                                                                                                                                                                                                                                                                                                                                                                                                                                                                                                                                                                                                                                                                                                                                                                                                                                                                                                                                                                                                                                                                                                                                                                                                                                                                                                                                                                                                                                                                                                                                                                                                                                                                                                                                                                                                                                                                                                                                                                                                                                                                                                                                                                                                                                                                                                                                                                                                                                                                                                                                                                                                                                                                                                         |          |          |          |          |         |         |          |          |         |          |                                                                                                                                                                                                                         |                                                                                                                                                                                                                                                                                                                                                                                                                                                                                                                                                                                                                                                                                                                                                                                                                                                                                                                                                                                                                                                                                                                                                                                                                                                                                                                                                                                                                                                                                                                                                                                                                                                                                                                                                                                                                                                                                                                                                                                                                                                                                                                                                                                                                                                                                                                                                                                                                                                                                                                                                                                                                                                                                                                                                                                                                                                                                                                                                                                                                                                                                                                                                             |   |          |          |          |   |          |          |          |   |          |          |          |   |          |          |          |   |          |          |          |   |          |          |          |   |          |          |          |   |          |         |         |   |          |         |         |   |         |         |         |   |          |         |         |   |          |         |         |   |         |          |          |   |          |          |          |   |         |         |         |   |         |          |          |   |          |          |          |   |          |         |          |   |          |          |          |   |          |          |         |   |          |          |         |   |          |          |          |   |         |          |         |   |         |          |         |   |         |          |          |   |          |          |         |   |          |          |          |   |          |          |          |   |          |          |          |   |          |          |          |   |          |         |          |   |          |         |          |   |          |         |          |   |          |         |          |   |          |         |          |   |         |          |          |   |         |          |          |   |         |         |          |   |         |         |          |   |          |          |         |   |          |          |         |   |          |          |         |   |          |          |         |
| H                                                                                                                                                                                                                      | 1.20748                                                                                                                                                                                                                                                                                                                                                                                                                                                                                                                                                                                                                                                                                                                                                                                                                                                                                                                                                                                                                                                                                                                                                                                                                                                                                                                                                                                                                                                                                                                                                                                                                                                                                                                                                                                                                                                                                                                                                                                                                                                                                                                                                                                                                                                                                                                                                                                                                                                                                                                                                                                                                                                                                                                                                                                                                                                                                                                                                                                                                                                                                                                                                        | 4.22932  | 1.79831  |          |          |   |          |          |          |   |          |          |          |   |          |          |          |   |          |         |          |   |          |          |          |   |          |          |          |   |          |         |          |   |          |         |          |   |         |         |         |   |         |         |         |   |          |         |          |   |          |         |         |   |         |         |         |   |          |         |         |   |         |         |         |   |          |          |          |   |          |          |          |   |         |         |         |   |          |          |         |   |          |         |          |   |         |          |         |   |         |          |          |   |         |          |          |   |         |          |          |   |         |          |          |   |         |          |         |   |         |          |         |   |         |          |         |   |         |         |         |   |          |          |         |   |          |          |         |   |          |          |         |   |          |          |         |   |          |          |         |   |          |          |         |   |          |          |         |   |          |          |         |   |          |          |         |   |          |          |          |                                                                                                                                                                                                                       |                                                                                                                                                                                                                                                                                                                                                                                                                                                                                                                                                                                                                                                                                                                                                                                                                                                                                                                                                                                                                                                                                                                                                                                                                                                                                                                                                                                                                                                                                                                                                                                                                                                                                                                                                                                                                                                                                                                                                                                                                                                                                                                                                                                                                                                                                                                                                                                                                                                                                                                                                                                                                                                                                                                                                                                                                                                                                                                                         |          |          |          |          |         |         |          |          |         |          |                                                                                                                                                                                                                         |                                                                                                                                                                                                                                                                                                                                                                                                                                                                                                                                                                                                                                                                                                                                                                                                                                                                                                                                                                                                                                                                                                                                                                                                                                                                                                                                                                                                                                                                                                                                                                                                                                                                                                                                                                                                                                                                                                                                                                                                                                                                                                                                                                                                                                                                                                                                                                                                                                                                                                                                                                                                                                                                                                                                                                                                                                                                                                                                                                                                                                                                                                                                                             |   |          |          |          |   |          |          |          |   |          |          |          |   |          |          |          |   |          |          |          |   |          |          |          |   |          |          |          |   |          |         |         |   |          |         |         |   |         |         |         |   |          |         |         |   |          |         |         |   |         |          |          |   |          |          |          |   |         |         |         |   |         |          |          |   |          |          |          |   |          |         |          |   |          |          |          |   |          |          |         |   |          |          |         |   |          |          |          |   |         |          |         |   |         |          |         |   |         |          |          |   |          |          |         |   |          |          |          |   |          |          |          |   |          |          |          |   |          |          |          |   |          |         |          |   |          |         |          |   |          |         |          |   |          |         |          |   |          |         |          |   |         |          |          |   |         |          |          |   |         |         |          |   |         |         |          |   |          |          |         |   |          |          |         |   |          |          |         |   |          |          |         |
| C                                                                                                                                                                                                                      | -1.56355                                                                                                                                                                                                                                                                                                                                                                                                                                                                                                                                                                                                                                                                                                                                                                                                                                                                                                                                                                                                                                                                                                                                                                                                                                                                                                                                                                                                                                                                                                                                                                                                                                                                                                                                                                                                                                                                                                                                                                                                                                                                                                                                                                                                                                                                                                                                                                                                                                                                                                                                                                                                                                                                                                                                                                                                                                                                                                                                                                                                                                                                                                                                                       | -0.96369 | 0.92848  |          |          |   |          |          |          |   |          |          |          |   |          |          |          |   |          |         |          |   |          |          |          |   |          |          |          |   |          |         |          |   |          |         |          |   |         |         |         |   |         |         |         |   |          |         |          |   |          |         |         |   |         |         |         |   |          |         |         |   |         |         |         |   |          |          |          |   |          |          |          |   |         |         |         |   |          |          |         |   |          |         |          |   |         |          |         |   |         |          |          |   |         |          |          |   |         |          |          |   |         |          |          |   |         |          |         |   |         |          |         |   |         |          |         |   |         |         |         |   |          |          |         |   |          |          |         |   |          |          |         |   |          |          |         |   |          |          |         |   |          |          |         |   |          |          |         |   |          |          |         |   |          |          |         |   |          |          |          |                                                                                                                                                                                                                       |                                                                                                                                                                                                                                                                                                                                                                                                                                                                                                                                                                                                                                                                                                                                                                                                                                                                                                                                                                                                                                                                                                                                                                                                                                                                                                                                                                                                                                                                                                                                                                                                                                                                                                                                                                                                                                                                                                                                                                                                                                                                                                                                                                                                                                                                                                                                                                                                                                                                                                                                                                                                                                                                                                                                                                                                                                                                                                                                         |          |          |          |          |         |         |          |          |         |          |                                                                                                                                                                                                                         |                                                                                                                                                                                                                                                                                                                                                                                                                                                                                                                                                                                                                                                                                                                                                                                                                                                                                                                                                                                                                                                                                                                                                                                                                                                                                                                                                                                                                                                                                                                                                                                                                                                                                                                                                                                                                                                                                                                                                                                                                                                                                                                                                                                                                                                                                                                                                                                                                                                                                                                                                                                                                                                                                                                                                                                                                                                                                                                                                                                                                                                                                                                                                             |   |          |          |          |   |          |          |          |   |          |          |          |   |          |          |          |   |          |          |          |   |          |          |          |   |          |          |          |   |          |         |         |   |          |         |         |   |         |         |         |   |          |         |         |   |          |         |         |   |         |          |          |   |          |          |          |   |         |         |         |   |         |          |          |   |          |          |          |   |          |         |          |   |          |          |          |   |          |          |         |   |          |          |         |   |          |          |          |   |         |          |         |   |         |          |         |   |         |          |          |   |          |          |         |   |          |          |          |   |          |          |          |   |          |          |          |   |          |          |          |   |          |         |          |   |          |         |          |   |          |         |          |   |          |         |          |   |          |         |          |   |         |          |          |   |         |          |          |   |         |         |          |   |         |         |          |   |          |          |         |   |          |          |         |   |          |          |         |   |          |          |         |
| H                                                                                                                                                                                                                      | -1.78576                                                                                                                                                                                                                                                                                                                                                                                                                                                                                                                                                                                                                                                                                                                                                                                                                                                                                                                                                                                                                                                                                                                                                                                                                                                                                                                                                                                                                                                                                                                                                                                                                                                                                                                                                                                                                                                                                                                                                                                                                                                                                                                                                                                                                                                                                                                                                                                                                                                                                                                                                                                                                                                                                                                                                                                                                                                                                                                                                                                                                                                                                                                                                       | 2.51921  | -0.73354 |          |          |   |          |          |          |   |          |          |          |   |          |          |          |   |          |         |          |   |          |          |          |   |          |          |          |   |          |         |          |   |          |         |          |   |         |         |         |   |         |         |         |   |          |         |          |   |          |         |         |   |         |         |         |   |          |         |         |   |         |         |         |   |          |          |          |   |          |          |          |   |         |         |         |   |          |          |         |   |          |         |          |   |         |          |         |   |         |          |          |   |         |          |          |   |         |          |          |   |         |          |          |   |         |          |         |   |         |          |         |   |         |          |         |   |         |         |         |   |          |          |         |   |          |          |         |   |          |          |         |   |          |          |         |   |          |          |         |   |          |          |         |   |          |          |         |   |          |          |         |   |          |          |         |   |          |          |          |                                                                                                                                                                                                                       |                                                                                                                                                                                                                                                                                                                                                                                                                                                                                                                                                                                                                                                                                                                                                                                                                                                                                                                                                                                                                                                                                                                                                                                                                                                                                                                                                                                                                                                                                                                                                                                                                                                                                                                                                                                                                                                                                                                                                                                                                                                                                                                                                                                                                                                                                                                                                                                                                                                                                                                                                                                                                                                                                                                                                                                                                                                                                                                                         |          |          |          |          |         |         |          |          |         |          |                                                                                                                                                                                                                         |                                                                                                                                                                                                                                                                                                                                                                                                                                                                                                                                                                                                                                                                                                                                                                                                                                                                                                                                                                                                                                                                                                                                                                                                                                                                                                                                                                                                                                                                                                                                                                                                                                                                                                                                                                                                                                                                                                                                                                                                                                                                                                                                                                                                                                                                                                                                                                                                                                                                                                                                                                                                                                                                                                                                                                                                                                                                                                                                                                                                                                                                                                                                                             |   |          |          |          |   |          |          |          |   |          |          |          |   |          |          |          |   |          |          |          |   |          |          |          |   |          |          |          |   |          |         |         |   |          |         |         |   |         |         |         |   |          |         |         |   |          |         |         |   |         |          |          |   |          |          |          |   |         |         |         |   |         |          |          |   |          |          |          |   |          |         |          |   |          |          |          |   |          |          |         |   |          |          |         |   |          |          |          |   |         |          |         |   |         |          |         |   |         |          |          |   |          |          |         |   |          |          |          |   |          |          |          |   |          |          |          |   |          |          |          |   |          |         |          |   |          |         |          |   |          |         |          |   |          |         |          |   |          |         |          |   |         |          |          |   |         |          |          |   |         |         |          |   |         |         |          |   |          |          |         |   |          |          |         |   |          |          |         |   |          |          |         |
| C                                                                                                                                                                                                                      | 2.11898                                                                                                                                                                                                                                                                                                                                                                                                                                                                                                                                                                                                                                                                                                                                                                                                                                                                                                                                                                                                                                                                                                                                                                                                                                                                                                                                                                                                                                                                                                                                                                                                                                                                                                                                                                                                                                                                                                                                                                                                                                                                                                                                                                                                                                                                                                                                                                                                                                                                                                                                                                                                                                                                                                                                                                                                                                                                                                                                                                                                                                                                                                                                                        | -0.04698 | 0.25607  |          |          |   |          |          |          |   |          |          |          |   |          |          |          |   |          |         |          |   |          |          |          |   |          |          |          |   |          |         |          |   |          |         |          |   |         |         |         |   |         |         |         |   |          |         |          |   |          |         |         |   |         |         |         |   |          |         |         |   |         |         |         |   |          |          |          |   |          |          |          |   |         |         |         |   |          |          |         |   |          |         |          |   |         |          |         |   |         |          |          |   |         |          |          |   |         |          |          |   |         |          |          |   |         |          |         |   |         |          |         |   |         |          |         |   |         |         |         |   |          |          |         |   |          |          |         |   |          |          |         |   |          |          |         |   |          |          |         |   |          |          |         |   |          |          |         |   |          |          |         |   |          |          |         |   |          |          |          |                                                                                                                                                                                                                       |                                                                                                                                                                                                                                                                                                                                                                                                                                                                                                                                                                                                                                                                                                                                                                                                                                                                                                                                                                                                                                                                                                                                                                                                                                                                                                                                                                                                                                                                                                                                                                                                                                                                                                                                                                                                                                                                                                                                                                                                                                                                                                                                                                                                                                                                                                                                                                                                                                                                                                                                                                                                                                                                                                                                                                                                                                                                                                                                         |          |          |          |          |         |         |          |          |         |          |                                                                                                                                                                                                                         |                                                                                                                                                                                                                                                                                                                                                                                                                                                                                                                                                                                                                                                                                                                                                                                                                                                                                                                                                                                                                                                                                                                                                                                                                                                                                                                                                                                                                                                                                                                                                                                                                                                                                                                                                                                                                                                                                                                                                                                                                                                                                                                                                                                                                                                                                                                                                                                                                                                                                                                                                                                                                                                                                                                                                                                                                                                                                                                                                                                                                                                                                                                                                             |   |          |          |          |   |          |          |          |   |          |          |          |   |          |          |          |   |          |          |          |   |          |          |          |   |          |          |          |   |          |         |         |   |          |         |         |   |         |         |         |   |          |         |         |   |          |         |         |   |         |          |          |   |          |          |          |   |         |         |         |   |         |          |          |   |          |          |          |   |          |         |          |   |          |          |          |   |          |          |         |   |          |          |         |   |          |          |          |   |         |          |         |   |         |          |         |   |         |          |          |   |          |          |         |   |          |          |          |   |          |          |          |   |          |          |          |   |          |          |          |   |          |         |          |   |          |         |          |   |          |         |          |   |          |         |          |   |          |         |          |   |         |          |          |   |         |          |          |   |         |         |          |   |         |         |          |   |          |          |         |   |          |          |         |   |          |          |         |   |          |          |         |
| C                                                                                                                                                                                                                      | 1.70124                                                                                                                                                                                                                                                                                                                                                                                                                                                                                                                                                                                                                                                                                                                                                                                                                                                                                                                                                                                                                                                                                                                                                                                                                                                                                                                                                                                                                                                                                                                                                                                                                                                                                                                                                                                                                                                                                                                                                                                                                                                                                                                                                                                                                                                                                                                                                                                                                                                                                                                                                                                                                                                                                                                                                                                                                                                                                                                                                                                                                                                                                                                                                        | -1.23984 | -0.61433 |          |          |   |          |          |          |   |          |          |          |   |          |          |          |   |          |         |          |   |          |          |          |   |          |          |          |   |          |         |          |   |          |         |          |   |         |         |         |   |         |         |         |   |          |         |          |   |          |         |         |   |         |         |         |   |          |         |         |   |         |         |         |   |          |          |          |   |          |          |          |   |         |         |         |   |          |          |         |   |          |         |          |   |         |          |         |   |         |          |          |   |         |          |          |   |         |          |          |   |         |          |          |   |         |          |         |   |         |          |         |   |         |          |         |   |         |         |         |   |          |          |         |   |          |          |         |   |          |          |         |   |          |          |         |   |          |          |         |   |          |          |         |   |          |          |         |   |          |          |         |   |          |          |         |   |          |          |          |                                                                                                                                                                                                                       |                                                                                                                                                                                                                                                                                                                                                                                                                                                                                                                                                                                                                                                                                                                                                                                                                                                                                                                                                                                                                                                                                                                                                                                                                                                                                                                                                                                                                                                                                                                                                                                                                                                                                                                                                                                                                                                                                                                                                                                                                                                                                                                                                                                                                                                                                                                                                                                                                                                                                                                                                                                                                                                                                                                                                                                                                                                                                                                                         |          |          |          |          |         |         |          |          |         |          |                                                                                                                                                                                                                         |                                                                                                                                                                                                                                                                                                                                                                                                                                                                                                                                                                                                                                                                                                                                                                                                                                                                                                                                                                                                                                                                                                                                                                                                                                                                                                                                                                                                                                                                                                                                                                                                                                                                                                                                                                                                                                                                                                                                                                                                                                                                                                                                                                                                                                                                                                                                                                                                                                                                                                                                                                                                                                                                                                                                                                                                                                                                                                                                                                                                                                                                                                                                                             |   |          |          |          |   |          |          |          |   |          |          |          |   |          |          |          |   |          |          |          |   |          |          |          |   |          |          |          |   |          |         |         |   |          |         |         |   |         |         |         |   |          |         |         |   |          |         |         |   |         |          |          |   |          |          |          |   |         |         |         |   |         |          |          |   |          |          |          |   |          |         |          |   |          |          |          |   |          |          |         |   |          |          |         |   |          |          |          |   |         |          |         |   |         |          |         |   |         |          |          |   |          |          |         |   |          |          |          |   |          |          |          |   |          |          |          |   |          |          |          |   |          |         |          |   |          |         |          |   |          |         |          |   |          |         |          |   |          |         |          |   |         |          |          |   |         |          |          |   |         |         |          |   |         |         |          |   |          |          |         |   |          |          |         |   |          |          |         |   |          |          |         |
| H                                                                                                                                                                                                                      | 2.52002                                                                                                                                                                                                                                                                                                                                                                                                                                                                                                                                                                                                                                                                                                                                                                                                                                                                                                                                                                                                                                                                                                                                                                                                                                                                                                                                                                                                                                                                                                                                                                                                                                                                                                                                                                                                                                                                                                                                                                                                                                                                                                                                                                                                                                                                                                                                                                                                                                                                                                                                                                                                                                                                                                                                                                                                                                                                                                                                                                                                                                                                                                                                                        | -1.96330 | -0.60413 |          |          |   |          |          |          |   |          |          |          |   |          |          |          |   |          |         |          |   |          |          |          |   |          |          |          |   |          |         |          |   |          |         |          |   |         |         |         |   |         |         |         |   |          |         |          |   |          |         |         |   |         |         |         |   |          |         |         |   |         |         |         |   |          |          |          |   |          |          |          |   |         |         |         |   |          |          |         |   |          |         |          |   |         |          |         |   |         |          |          |   |         |          |          |   |         |          |          |   |         |          |          |   |         |          |         |   |         |          |         |   |         |          |         |   |         |         |         |   |          |          |         |   |          |          |         |   |          |          |         |   |          |          |         |   |          |          |         |   |          |          |         |   |          |          |         |   |          |          |         |   |          |          |         |   |          |          |          |                                                                                                                                                                                                                       |                                                                                                                                                                                                                                                                                                                                                                                                                                                                                                                                                                                                                                                                                                                                                                                                                                                                                                                                                                                                                                                                                                                                                                                                                                                                                                                                                                                                                                                                                                                                                                                                                                                                                                                                                                                                                                                                                                                                                                                                                                                                                                                                                                                                                                                                                                                                                                                                                                                                                                                                                                                                                                                                                                                                                                                                                                                                                                                                         |          |          |          |          |         |         |          |          |         |          |                                                                                                                                                                                                                         |                                                                                                                                                                                                                                                                                                                                                                                                                                                                                                                                                                                                                                                                                                                                                                                                                                                                                                                                                                                                                                                                                                                                                                                                                                                                                                                                                                                                                                                                                                                                                                                                                                                                                                                                                                                                                                                                                                                                                                                                                                                                                                                                                                                                                                                                                                                                                                                                                                                                                                                                                                                                                                                                                                                                                                                                                                                                                                                                                                                                                                                                                                                                                             |   |          |          |          |   |          |          |          |   |          |          |          |   |          |          |          |   |          |          |          |   |          |          |          |   |          |          |          |   |          |         |         |   |          |         |         |   |         |         |         |   |          |         |         |   |          |         |         |   |         |          |          |   |          |          |          |   |         |         |         |   |         |          |          |   |          |          |          |   |          |         |          |   |          |          |          |   |          |          |         |   |          |          |         |   |          |          |          |   |         |          |         |   |         |          |         |   |         |          |          |   |          |          |         |   |          |          |          |   |          |          |          |   |          |          |          |   |          |          |          |   |          |         |          |   |          |         |          |   |          |         |          |   |          |         |          |   |          |         |          |   |         |          |          |   |         |          |          |   |         |         |          |   |         |         |          |   |          |          |         |   |          |          |         |   |          |          |         |   |          |          |         |
| H                                                                                                                                                                                                                      | 1.51346                                                                                                                                                                                                                                                                                                                                                                                                                                                                                                                                                                                                                                                                                                                                                                                                                                                                                                                                                                                                                                                                                                                                                                                                                                                                                                                                                                                                                                                                                                                                                                                                                                                                                                                                                                                                                                                                                                                                                                                                                                                                                                                                                                                                                                                                                                                                                                                                                                                                                                                                                                                                                                                                                                                                                                                                                                                                                                                                                                                                                                                                                                                                                        | -0.95126 | -1.64703 |          |          |   |          |          |          |   |          |          |          |   |          |          |          |   |          |         |          |   |          |          |          |   |          |          |          |   |          |         |          |   |          |         |          |   |         |         |         |   |         |         |         |   |          |         |          |   |          |         |         |   |         |         |         |   |          |         |         |   |         |         |         |   |          |          |          |   |          |          |          |   |         |         |         |   |          |          |         |   |          |         |          |   |         |          |         |   |         |          |          |   |         |          |          |   |         |          |          |   |         |          |          |   |         |          |         |   |         |          |         |   |         |          |         |   |         |         |         |   |          |          |         |   |          |          |         |   |          |          |         |   |          |          |         |   |          |          |         |   |          |          |         |   |          |          |         |   |          |          |         |   |          |          |         |   |          |          |          |                                                                                                                                                                                                                       |                                                                                                                                                                                                                                                                                                                                                                                                                                                                                                                                                                                                                                                                                                                                                                                                                                                                                                                                                                                                                                                                                                                                                                                                                                                                                                                                                                                                                                                                                                                                                                                                                                                                                                                                                                                                                                                                                                                                                                                                                                                                                                                                                                                                                                                                                                                                                                                                                                                                                                                                                                                                                                                                                                                                                                                                                                                                                                                                         |          |          |          |          |         |         |          |          |         |          |                                                                                                                                                                                                                         |                                                                                                                                                                                                                                                                                                                                                                                                                                                                                                                                                                                                                                                                                                                                                                                                                                                                                                                                                                                                                                                                                                                                                                                                                                                                                                                                                                                                                                                                                                                                                                                                                                                                                                                                                                                                                                                                                                                                                                                                                                                                                                                                                                                                                                                                                                                                                                                                                                                                                                                                                                                                                                                                                                                                                                                                                                                                                                                                                                                                                                                                                                                                                             |   |          |          |          |   |          |          |          |   |          |          |          |   |          |          |          |   |          |          |          |   |          |          |          |   |          |          |          |   |          |         |         |   |          |         |         |   |         |         |         |   |          |         |         |   |          |         |         |   |         |          |          |   |          |          |          |   |         |         |         |   |         |          |          |   |          |          |          |   |          |         |          |   |          |          |          |   |          |          |         |   |          |          |         |   |          |          |          |   |         |          |         |   |         |          |         |   |         |          |          |   |          |          |         |   |          |          |          |   |          |          |          |   |          |          |          |   |          |          |          |   |          |         |          |   |          |         |          |   |          |         |          |   |          |         |          |   |          |         |          |   |         |          |          |   |         |          |          |   |         |         |          |   |         |         |          |   |          |          |         |   |          |          |         |   |          |          |         |   |          |          |         |
| H                                                                                                                                                                                                                      | 0.81347                                                                                                                                                                                                                                                                                                                                                                                                                                                                                                                                                                                                                                                                                                                                                                                                                                                                                                                                                                                                                                                                                                                                                                                                                                                                                                                                                                                                                                                                                                                                                                                                                                                                                                                                                                                                                                                                                                                                                                                                                                                                                                                                                                                                                                                                                                                                                                                                                                                                                                                                                                                                                                                                                                                                                                                                                                                                                                                                                                                                                                                                                                                                                        | -1.73694 | -0.23254 |          |          |   |          |          |          |   |          |          |          |   |          |          |          |   |          |         |          |   |          |          |          |   |          |          |          |   |          |         |          |   |          |         |          |   |         |         |         |   |         |         |         |   |          |         |          |   |          |         |         |   |         |         |         |   |          |         |         |   |         |         |         |   |          |          |          |   |          |          |          |   |         |         |         |   |          |          |         |   |          |         |          |   |         |          |         |   |         |          |          |   |         |          |          |   |         |          |          |   |         |          |          |   |         |          |         |   |         |          |         |   |         |          |         |   |         |         |         |   |          |          |         |   |          |          |         |   |          |          |         |   |          |          |         |   |          |          |         |   |          |          |         |   |          |          |         |   |          |          |         |   |          |          |         |   |          |          |          |                                                                                                                                                                                                                       |                                                                                                                                                                                                                                                                                                                                                                                                                                                                                                                                                                                                                                                                                                                                                                                                                                                                                                                                                                                                                                                                                                                                                                                                                                                                                                                                                                                                                                                                                                                                                                                                                                                                                                                                                                                                                                                                                                                                                                                                                                                                                                                                                                                                                                                                                                                                                                                                                                                                                                                                                                                                                                                                                                                                                                                                                                                                                                                                         |          |          |          |          |         |         |          |          |         |          |                                                                                                                                                                                                                         |                                                                                                                                                                                                                                                                                                                                                                                                                                                                                                                                                                                                                                                                                                                                                                                                                                                                                                                                                                                                                                                                                                                                                                                                                                                                                                                                                                                                                                                                                                                                                                                                                                                                                                                                                                                                                                                                                                                                                                                                                                                                                                                                                                                                                                                                                                                                                                                                                                                                                                                                                                                                                                                                                                                                                                                                                                                                                                                                                                                                                                                                                                                                                             |   |          |          |          |   |          |          |          |   |          |          |          |   |          |          |          |   |          |          |          |   |          |          |          |   |          |          |          |   |          |         |         |   |          |         |         |   |         |         |         |   |          |         |         |   |          |         |         |   |         |          |          |   |          |          |          |   |         |         |         |   |         |          |          |   |          |          |          |   |          |         |          |   |          |          |          |   |          |          |         |   |          |          |         |   |          |          |          |   |         |          |         |   |         |          |         |   |         |          |          |   |          |          |         |   |          |          |          |   |          |          |          |   |          |          |          |   |          |          |          |   |          |         |          |   |          |         |          |   |          |         |          |   |          |         |          |   |          |         |          |   |         |          |          |   |         |          |          |   |         |         |          |   |         |         |          |   |          |          |         |   |          |          |         |   |          |          |         |   |          |          |         |
| C                                                                                                                                                                                                                      | 2.32006                                                                                                                                                                                                                                                                                                                                                                                                                                                                                                                                                                                                                                                                                                                                                                                                                                                                                                                                                                                                                                                                                                                                                                                                                                                                                                                                                                                                                                                                                                                                                                                                                                                                                                                                                                                                                                                                                                                                                                                                                                                                                                                                                                                                                                                                                                                                                                                                                                                                                                                                                                                                                                                                                                                                                                                                                                                                                                                                                                                                                                                                                                                                                        | -0.58343 | 1.68789  |          |          |   |          |          |          |   |          |          |          |   |          |          |          |   |          |         |          |   |          |          |          |   |          |          |          |   |          |         |          |   |          |         |          |   |         |         |         |   |         |         |         |   |          |         |          |   |          |         |         |   |         |         |         |   |          |         |         |   |         |         |         |   |          |          |          |   |          |          |          |   |         |         |         |   |          |          |         |   |          |         |          |   |         |          |         |   |         |          |          |   |         |          |          |   |         |          |          |   |         |          |          |   |         |          |         |   |         |          |         |   |         |          |         |   |         |         |         |   |          |          |         |   |          |          |         |   |          |          |         |   |          |          |         |   |          |          |         |   |          |          |         |   |          |          |         |   |          |          |         |   |          |          |         |   |          |          |          |                                                                                                                                                                                                                       |                                                                                                                                                                                                                                                                                                                                                                                                                                                                                                                                                                                                                                                                                                                                                                                                                                                                                                                                                                                                                                                                                                                                                                                                                                                                                                                                                                                                                                                                                                                                                                                                                                                                                                                                                                                                                                                                                                                                                                                                                                                                                                                                                                                                                                                                                                                                                                                                                                                                                                                                                                                                                                                                                                                                                                                                                                                                                                                                         |          |          |          |          |         |         |          |          |         |          |                                                                                                                                                                                                                         |                                                                                                                                                                                                                                                                                                                                                                                                                                                                                                                                                                                                                                                                                                                                                                                                                                                                                                                                                                                                                                                                                                                                                                                                                                                                                                                                                                                                                                                                                                                                                                                                                                                                                                                                                                                                                                                                                                                                                                                                                                                                                                                                                                                                                                                                                                                                                                                                                                                                                                                                                                                                                                                                                                                                                                                                                                                                                                                                                                                                                                                                                                                                                             |   |          |          |          |   |          |          |          |   |          |          |          |   |          |          |          |   |          |          |          |   |          |          |          |   |          |          |          |   |          |         |         |   |          |         |         |   |         |         |         |   |          |         |         |   |          |         |         |   |         |          |          |   |          |          |          |   |         |         |         |   |         |          |          |   |          |          |          |   |          |         |          |   |          |          |          |   |          |          |         |   |          |          |         |   |          |          |          |   |         |          |         |   |         |          |         |   |         |          |          |   |          |          |         |   |          |          |          |   |          |          |          |   |          |          |          |   |          |          |          |   |          |         |          |   |          |         |          |   |          |         |          |   |          |         |          |   |          |         |          |   |         |          |          |   |         |          |          |   |         |         |          |   |         |         |          |   |          |          |         |   |          |          |         |   |          |          |         |   |          |          |         |
| H                                                                                                                                                                                                                      | 3.03228                                                                                                                                                                                                                                                                                                                                                                                                                                                                                                                                                                                                                                                                                                                                                                                                                                                                                                                                                                                                                                                                                                                                                                                                                                                                                                                                                                                                                                                                                                                                                                                                                                                                                                                                                                                                                                                                                                                                                                                                                                                                                                                                                                                                                                                                                                                                                                                                                                                                                                                                                                                                                                                                                                                                                                                                                                                                                                                                                                                                                                                                                                                                                        | -1.41205 | 1.67140  |          |          |   |          |          |          |   |          |          |          |   |          |          |          |   |          |         |          |   |          |          |          |   |          |          |          |   |          |         |          |   |          |         |          |   |         |         |         |   |         |         |         |   |          |         |          |   |          |         |         |   |         |         |         |   |          |         |         |   |         |         |         |   |          |          |          |   |          |          |          |   |         |         |         |   |          |          |         |   |          |         |          |   |         |          |         |   |         |          |          |   |         |          |          |   |         |          |          |   |         |          |          |   |         |          |         |   |         |          |         |   |         |          |         |   |         |         |         |   |          |          |         |   |          |          |         |   |          |          |         |   |          |          |         |   |          |          |         |   |          |          |         |   |          |          |         |   |          |          |         |   |          |          |         |   |          |          |          |                                                                                                                                                                                                                       |                                                                                                                                                                                                                                                                                                                                                                                                                                                                                                                                                                                                                                                                                                                                                                                                                                                                                                                                                                                                                                                                                                                                                                                                                                                                                                                                                                                                                                                                                                                                                                                                                                                                                                                                                                                                                                                                                                                                                                                                                                                                                                                                                                                                                                                                                                                                                                                                                                                                                                                                                                                                                                                                                                                                                                                                                                                                                                                                         |          |          |          |          |         |         |          |          |         |          |                                                                                                                                                                                                                         |                                                                                                                                                                                                                                                                                                                                                                                                                                                                                                                                                                                                                                                                                                                                                                                                                                                                                                                                                                                                                                                                                                                                                                                                                                                                                                                                                                                                                                                                                                                                                                                                                                                                                                                                                                                                                                                                                                                                                                                                                                                                                                                                                                                                                                                                                                                                                                                                                                                                                                                                                                                                                                                                                                                                                                                                                                                                                                                                                                                                                                                                                                                                                             |   |          |          |          |   |          |          |          |   |          |          |          |   |          |          |          |   |          |          |          |   |          |          |          |   |          |          |          |   |          |         |         |   |          |         |         |   |         |         |         |   |          |         |         |   |          |         |         |   |         |          |          |   |          |          |          |   |         |         |         |   |         |          |          |   |          |          |          |   |          |         |          |   |          |          |          |   |          |          |         |   |          |          |         |   |          |          |          |   |         |          |         |   |         |          |         |   |         |          |          |   |          |          |         |   |          |          |          |   |          |          |          |   |          |          |          |   |          |          |          |   |          |         |          |   |          |         |          |   |          |         |          |   |          |         |          |   |          |         |          |   |         |          |          |   |         |          |          |   |         |         |          |   |         |         |          |   |          |          |         |   |          |          |         |   |          |          |         |   |          |          |         |
| H                                                                                                                                                                                                                      | 1.37584                                                                                                                                                                                                                                                                                                                                                                                                                                                                                                                                                                                                                                                                                                                                                                                                                                                                                                                                                                                                                                                                                                                                                                                                                                                                                                                                                                                                                                                                                                                                                                                                                                                                                                                                                                                                                                                                                                                                                                                                                                                                                                                                                                                                                                                                                                                                                                                                                                                                                                                                                                                                                                                                                                                                                                                                                                                                                                                                                                                                                                                                                                                                                        | -0.95179 | 2.09448  |          |          |   |          |          |          |   |          |          |          |   |          |          |          |   |          |         |          |   |          |          |          |   |          |          |          |   |          |         |          |   |          |         |          |   |         |         |         |   |         |         |         |   |          |         |          |   |          |         |         |   |         |         |         |   |          |         |         |   |         |         |         |   |          |          |          |   |          |          |          |   |         |         |         |   |          |          |         |   |          |         |          |   |         |          |         |   |         |          |          |   |         |          |          |   |         |          |          |   |         |          |          |   |         |          |         |   |         |          |         |   |         |          |         |   |         |         |         |   |          |          |         |   |          |          |         |   |          |          |         |   |          |          |         |   |          |          |         |   |          |          |         |   |          |          |         |   |          |          |         |   |          |          |         |   |          |          |          |                                                                                                                                                                                                                       |                                                                                                                                                                                                                                                                                                                                                                                                                                                                                                                                                                                                                                                                                                                                                                                                                                                                                                                                                                                                                                                                                                                                                                                                                                                                                                                                                                                                                                                                                                                                                                                                                                                                                                                                                                                                                                                                                                                                                                                                                                                                                                                                                                                                                                                                                                                                                                                                                                                                                                                                                                                                                                                                                                                                                                                                                                                                                                                                         |          |          |          |          |         |         |          |          |         |          |                                                                                                                                                                                                                         |                                                                                                                                                                                                                                                                                                                                                                                                                                                                                                                                                                                                                                                                                                                                                                                                                                                                                                                                                                                                                                                                                                                                                                                                                                                                                                                                                                                                                                                                                                                                                                                                                                                                                                                                                                                                                                                                                                                                                                                                                                                                                                                                                                                                                                                                                                                                                                                                                                                                                                                                                                                                                                                                                                                                                                                                                                                                                                                                                                                                                                                                                                                                                             |   |          |          |          |   |          |          |          |   |          |          |          |   |          |          |          |   |          |          |          |   |          |          |          |   |          |          |          |   |          |         |         |   |          |         |         |   |         |         |         |   |          |         |         |   |          |         |         |   |         |          |          |   |          |          |          |   |         |         |         |   |         |          |          |   |          |          |          |   |          |         |          |   |          |          |          |   |          |          |         |   |          |          |         |   |          |          |          |   |         |          |         |   |         |          |         |   |         |          |          |   |          |          |         |   |          |          |          |   |          |          |          |   |          |          |          |   |          |          |          |   |          |         |          |   |          |         |          |   |          |         |          |   |          |         |          |   |          |         |          |   |         |          |          |   |         |          |          |   |         |         |          |   |         |         |          |   |          |          |         |   |          |          |         |   |          |          |         |   |          |          |         |
| H                                                                                                                                                                                                                      | 2.70485                                                                                                                                                                                                                                                                                                                                                                                                                                                                                                                                                                                                                                                                                                                                                                                                                                                                                                                                                                                                                                                                                                                                                                                                                                                                                                                                                                                                                                                                                                                                                                                                                                                                                                                                                                                                                                                                                                                                                                                                                                                                                                                                                                                                                                                                                                                                                                                                                                                                                                                                                                                                                                                                                                                                                                                                                                                                                                                                                                                                                                                                                                                                                        | 0.18452  | 2.35921  |          |          |   |          |          |          |   |          |          |          |   |          |          |          |   |          |         |          |   |          |          |          |   |          |          |          |   |          |         |          |   |          |         |          |   |         |         |         |   |         |         |         |   |          |         |          |   |          |         |         |   |         |         |         |   |          |         |         |   |         |         |         |   |          |          |          |   |          |          |          |   |         |         |         |   |          |          |         |   |          |         |          |   |         |          |         |   |         |          |          |   |         |          |          |   |         |          |          |   |         |          |          |   |         |          |         |   |         |          |         |   |         |          |         |   |         |         |         |   |          |          |         |   |          |          |         |   |          |          |         |   |          |          |         |   |          |          |         |   |          |          |         |   |          |          |         |   |          |          |         |   |          |          |         |   |          |          |          |                                                                                                                                                                                                                       |                                                                                                                                                                                                                                                                                                                                                                                                                                                                                                                                                                                                                                                                                                                                                                                                                                                                                                                                                                                                                                                                                                                                                                                                                                                                                                                                                                                                                                                                                                                                                                                                                                                                                                                                                                                                                                                                                                                                                                                                                                                                                                                                                                                                                                                                                                                                                                                                                                                                                                                                                                                                                                                                                                                                                                                                                                                                                                                                         |          |          |          |          |         |         |          |          |         |          |                                                                                                                                                                                                                         |                                                                                                                                                                                                                                                                                                                                                                                                                                                                                                                                                                                                                                                                                                                                                                                                                                                                                                                                                                                                                                                                                                                                                                                                                                                                                                                                                                                                                                                                                                                                                                                                                                                                                                                                                                                                                                                                                                                                                                                                                                                                                                                                                                                                                                                                                                                                                                                                                                                                                                                                                                                                                                                                                                                                                                                                                                                                                                                                                                                                                                                                                                                                                             |   |          |          |          |   |          |          |          |   |          |          |          |   |          |          |          |   |          |          |          |   |          |          |          |   |          |          |          |   |          |         |         |   |          |         |         |   |         |         |         |   |          |         |         |   |          |         |         |   |         |          |          |   |          |          |          |   |         |         |         |   |         |          |          |   |          |          |          |   |          |         |          |   |          |          |          |   |          |          |         |   |          |          |         |   |          |          |          |   |         |          |         |   |         |          |         |   |         |          |          |   |          |          |         |   |          |          |          |   |          |          |          |   |          |          |          |   |          |          |          |   |          |         |          |   |          |         |          |   |          |         |          |   |          |         |          |   |          |         |          |   |         |          |          |   |         |          |          |   |         |         |          |   |         |         |          |   |          |          |         |   |          |          |         |   |          |          |         |   |          |          |         |
| H                                                                                                                                                                                                                      | -0.67761                                                                                                                                                                                                                                                                                                                                                                                                                                                                                                                                                                                                                                                                                                                                                                                                                                                                                                                                                                                                                                                                                                                                                                                                                                                                                                                                                                                                                                                                                                                                                                                                                                                                                                                                                                                                                                                                                                                                                                                                                                                                                                                                                                                                                                                                                                                                                                                                                                                                                                                                                                                                                                                                                                                                                                                                                                                                                                                                                                                                                                                                                                                                                       | -0.48226 | 1.34326  |          |          |   |          |          |          |   |          |          |          |   |          |          |          |   |          |         |          |   |          |          |          |   |          |          |          |   |          |         |          |   |          |         |          |   |         |         |         |   |         |         |         |   |          |         |          |   |          |         |         |   |         |         |         |   |          |         |         |   |         |         |         |   |          |          |          |   |          |          |          |   |         |         |         |   |          |          |         |   |          |         |          |   |         |          |         |   |         |          |          |   |         |          |          |   |         |          |          |   |         |          |          |   |         |          |         |   |         |          |         |   |         |          |         |   |         |         |         |   |          |          |         |   |          |          |         |   |          |          |         |   |          |          |         |   |          |          |         |   |          |          |         |   |          |          |         |   |          |          |         |   |          |          |         |   |          |          |          |                                                                                                                                                                                                                       |                                                                                                                                                                                                                                                                                                                                                                                                                                                                                                                                                                                                                                                                                                                                                                                                                                                                                                                                                                                                                                                                                                                                                                                                                                                                                                                                                                                                                                                                                                                                                                                                                                                                                                                                                                                                                                                                                                                                                                                                                                                                                                                                                                                                                                                                                                                                                                                                                                                                                                                                                                                                                                                                                                                                                                                                                                                                                                                                         |          |          |          |          |         |         |          |          |         |          |                                                                                                                                                                                                                         |                                                                                                                                                                                                                                                                                                                                                                                                                                                                                                                                                                                                                                                                                                                                                                                                                                                                                                                                                                                                                                                                                                                                                                                                                                                                                                                                                                                                                                                                                                                                                                                                                                                                                                                                                                                                                                                                                                                                                                                                                                                                                                                                                                                                                                                                                                                                                                                                                                                                                                                                                                                                                                                                                                                                                                                                                                                                                                                                                                                                                                                                                                                                                             |   |          |          |          |   |          |          |          |   |          |          |          |   |          |          |          |   |          |          |          |   |          |          |          |   |          |          |          |   |          |         |         |   |          |         |         |   |         |         |         |   |          |         |         |   |          |         |         |   |         |          |          |   |          |          |          |   |         |         |         |   |         |          |          |   |          |          |          |   |          |         |          |   |          |          |          |   |          |          |         |   |          |          |         |   |          |          |          |   |         |          |         |   |         |          |         |   |         |          |          |   |          |          |         |   |          |          |          |   |          |          |          |   |          |          |          |   |          |          |          |   |          |         |          |   |          |         |          |   |          |         |          |   |          |         |          |   |          |         |          |   |         |          |          |   |         |          |          |   |         |         |          |   |         |         |          |   |          |          |         |   |          |          |         |   |          |          |         |   |          |          |         |
| C                                                                                                                                                                                                                      | -1.56733                                                                                                                                                                                                                                                                                                                                                                                                                                                                                                                                                                                                                                                                                                                                                                                                                                                                                                                                                                                                                                                                                                                                                                                                                                                                                                                                                                                                                                                                                                                                                                                                                                                                                                                                                                                                                                                                                                                                                                                                                                                                                                                                                                                                                                                                                                                                                                                                                                                                                                                                                                                                                                                                                                                                                                                                                                                                                                                                                                                                                                                                                                                                                       | -2.41384 | 1.41864  |          |          |   |          |          |          |   |          |          |          |   |          |          |          |   |          |         |          |   |          |          |          |   |          |          |          |   |          |         |          |   |          |         |          |   |         |         |         |   |         |         |         |   |          |         |          |   |          |         |         |   |         |         |         |   |          |         |         |   |         |         |         |   |          |          |          |   |          |          |          |   |         |         |         |   |          |          |         |   |          |         |          |   |         |          |         |   |         |          |          |   |         |          |          |   |         |          |          |   |         |          |          |   |         |          |         |   |         |          |         |   |         |          |         |   |         |         |         |   |          |          |         |   |          |          |         |   |          |          |         |   |          |          |         |   |          |          |         |   |          |          |         |   |          |          |         |   |          |          |         |   |          |          |         |   |          |          |          |                                                                                                                                                                                                                       |                                                                                                                                                                                                                                                                                                                                                                                                                                                                                                                                                                                                                                                                                                                                                                                                                                                                                                                                                                                                                                                                                                                                                                                                                                                                                                                                                                                                                                                                                                                                                                                                                                                                                                                                                                                                                                                                                                                                                                                                                                                                                                                                                                                                                                                                                                                                                                                                                                                                                                                                                                                                                                                                                                                                                                                                                                                                                                                                         |          |          |          |          |         |         |          |          |         |          |                                                                                                                                                                                                                         |                                                                                                                                                                                                                                                                                                                                                                                                                                                                                                                                                                                                                                                                                                                                                                                                                                                                                                                                                                                                                                                                                                                                                                                                                                                                                                                                                                                                                                                                                                                                                                                                                                                                                                                                                                                                                                                                                                                                                                                                                                                                                                                                                                                                                                                                                                                                                                                                                                                                                                                                                                                                                                                                                                                                                                                                                                                                                                                                                                                                                                                                                                                                                             |   |          |          |          |   |          |          |          |   |          |          |          |   |          |          |          |   |          |          |          |   |          |          |          |   |          |          |          |   |          |         |         |   |          |         |         |   |         |         |         |   |          |         |         |   |          |         |         |   |         |          |          |   |          |          |          |   |         |         |         |   |         |          |          |   |          |          |          |   |          |         |          |   |          |          |          |   |          |          |         |   |          |          |         |   |          |          |          |   |         |          |         |   |         |          |         |   |         |          |          |   |          |          |         |   |          |          |          |   |          |          |          |   |          |          |          |   |          |          |          |   |          |         |          |   |          |         |          |   |          |         |          |   |          |         |          |   |          |         |          |   |         |          |          |   |         |          |          |   |         |         |          |   |         |         |          |   |          |          |         |   |          |          |         |   |          |          |         |   |          |          |         |
| H                                                                                                                                                                                                                      | -0.72028                                                                                                                                                                                                                                                                                                                                                                                                                                                                                                                                                                                                                                                                                                                                                                                                                                                                                                                                                                                                                                                                                                                                                                                                                                                                                                                                                                                                                                                                                                                                                                                                                                                                                                                                                                                                                                                                                                                                                                                                                                                                                                                                                                                                                                                                                                                                                                                                                                                                                                                                                                                                                                                                                                                                                                                                                                                                                                                                                                                                                                                                                                                                                       | -2.97176 | 1.01402  |          |          |   |          |          |          |   |          |          |          |   |          |          |          |   |          |         |          |   |          |          |          |   |          |          |          |   |          |         |          |   |          |         |          |   |         |         |         |   |         |         |         |   |          |         |          |   |          |         |         |   |         |         |         |   |          |         |         |   |         |         |         |   |          |          |          |   |          |          |          |   |         |         |         |   |          |          |         |   |          |         |          |   |         |          |         |   |         |          |          |   |         |          |          |   |         |          |          |   |         |          |          |   |         |          |         |   |         |          |         |   |         |          |         |   |         |         |         |   |          |          |         |   |          |          |         |   |          |          |         |   |          |          |         |   |          |          |         |   |          |          |         |   |          |          |         |   |          |          |         |   |          |          |         |   |          |          |          |                                                                                                                                                                                                                       |                                                                                                                                                                                                                                                                                                                                                                                                                                                                                                                                                                                                                                                                                                                                                                                                                                                                                                                                                                                                                                                                                                                                                                                                                                                                                                                                                                                                                                                                                                                                                                                                                                                                                                                                                                                                                                                                                                                                                                                                                                                                                                                                                                                                                                                                                                                                                                                                                                                                                                                                                                                                                                                                                                                                                                                                                                                                                                                                         |          |          |          |          |         |         |          |          |         |          |                                                                                                                                                                                                                         |                                                                                                                                                                                                                                                                                                                                                                                                                                                                                                                                                                                                                                                                                                                                                                                                                                                                                                                                                                                                                                                                                                                                                                                                                                                                                                                                                                                                                                                                                                                                                                                                                                                                                                                                                                                                                                                                                                                                                                                                                                                                                                                                                                                                                                                                                                                                                                                                                                                                                                                                                                                                                                                                                                                                                                                                                                                                                                                                                                                                                                                                                                                                                             |   |          |          |          |   |          |          |          |   |          |          |          |   |          |          |          |   |          |          |          |   |          |          |          |   |          |          |          |   |          |         |         |   |          |         |         |   |         |         |         |   |          |         |         |   |          |         |         |   |         |          |          |   |          |          |          |   |         |         |         |   |         |          |          |   |          |          |          |   |          |         |          |   |          |          |          |   |          |          |         |   |          |          |         |   |          |          |          |   |         |          |         |   |         |          |         |   |         |          |          |   |          |          |         |   |          |          |          |   |          |          |          |   |          |          |          |   |          |          |          |   |          |         |          |   |          |         |          |   |          |         |          |   |          |         |          |   |          |         |          |   |         |          |          |   |         |          |          |   |         |         |          |   |         |         |          |   |          |          |         |   |          |          |         |   |          |          |         |   |          |          |         |
| H                                                                                                                                                                                                                      | -2.48453                                                                                                                                                                                                                                                                                                                                                                                                                                                                                                                                                                                                                                                                                                                                                                                                                                                                                                                                                                                                                                                                                                                                                                                                                                                                                                                                                                                                                                                                                                                                                                                                                                                                                                                                                                                                                                                                                                                                                                                                                                                                                                                                                                                                                                                                                                                                                                                                                                                                                                                                                                                                                                                                                                                                                                                                                                                                                                                                                                                                                                                                                                                                                       | -2.93126 | 1.12963  |          |          |   |          |          |          |   |          |          |          |   |          |          |          |   |          |         |          |   |          |          |          |   |          |          |          |   |          |         |          |   |          |         |          |   |         |         |         |   |         |         |         |   |          |         |          |   |          |         |         |   |         |         |         |   |          |         |         |   |         |         |         |   |          |          |          |   |          |          |          |   |         |         |         |   |          |          |         |   |          |         |          |   |         |          |         |   |         |          |          |   |         |          |          |   |         |          |          |   |         |          |          |   |         |          |         |   |         |          |         |   |         |          |         |   |         |         |         |   |          |          |         |   |          |          |         |   |          |          |         |   |          |          |         |   |          |          |         |   |          |          |         |   |          |          |         |   |          |          |         |   |          |          |         |   |          |          |          |                                                                                                                                                                                                                       |                                                                                                                                                                                                                                                                                                                                                                                                                                                                                                                                                                                                                                                                                                                                                                                                                                                                                                                                                                                                                                                                                                                                                                                                                                                                                                                                                                                                                                                                                                                                                                                                                                                                                                                                                                                                                                                                                                                                                                                                                                                                                                                                                                                                                                                                                                                                                                                                                                                                                                                                                                                                                                                                                                                                                                                                                                                                                                                                         |          |          |          |          |         |         |          |          |         |          |                                                                                                                                                                                                                         |                                                                                                                                                                                                                                                                                                                                                                                                                                                                                                                                                                                                                                                                                                                                                                                                                                                                                                                                                                                                                                                                                                                                                                                                                                                                                                                                                                                                                                                                                                                                                                                                                                                                                                                                                                                                                                                                                                                                                                                                                                                                                                                                                                                                                                                                                                                                                                                                                                                                                                                                                                                                                                                                                                                                                                                                                                                                                                                                                                                                                                                                                                                                                             |   |          |          |          |   |          |          |          |   |          |          |          |   |          |          |          |   |          |          |          |   |          |          |          |   |          |          |          |   |          |         |         |   |          |         |         |   |         |         |         |   |          |         |         |   |          |         |         |   |         |          |          |   |          |          |          |   |         |         |         |   |         |          |          |   |          |          |          |   |          |         |          |   |          |          |          |   |          |          |         |   |          |          |         |   |          |          |          |   |         |          |         |   |         |          |         |   |         |          |          |   |          |          |         |   |          |          |          |   |          |          |          |   |          |          |          |   |          |          |          |   |          |         |          |   |          |         |          |   |          |         |          |   |          |         |          |   |          |         |          |   |         |          |          |   |         |          |          |   |         |         |          |   |         |         |          |   |          |          |         |   |          |          |         |   |          |          |         |   |          |          |         |
| H                                                                                                                                                                                                                      | -1.50714                                                                                                                                                                                                                                                                                                                                                                                                                                                                                                                                                                                                                                                                                                                                                                                                                                                                                                                                                                                                                                                                                                                                                                                                                                                                                                                                                                                                                                                                                                                                                                                                                                                                                                                                                                                                                                                                                                                                                                                                                                                                                                                                                                                                                                                                                                                                                                                                                                                                                                                                                                                                                                                                                                                                                                                                                                                                                                                                                                                                                                                                                                                                                       | -2.43492 | 2.50880  |          |          |   |          |          |          |   |          |          |          |   |          |          |          |   |          |         |          |   |          |          |          |   |          |          |          |   |          |         |          |   |          |         |          |   |         |         |         |   |         |         |         |   |          |         |          |   |          |         |         |   |         |         |         |   |          |         |         |   |         |         |         |   |          |          |          |   |          |          |          |   |         |         |         |   |          |          |         |   |          |         |          |   |         |          |         |   |         |          |          |   |         |          |          |   |         |          |          |   |         |          |          |   |         |          |         |   |         |          |         |   |         |          |         |   |         |         |         |   |          |          |         |   |          |          |         |   |          |          |         |   |          |          |         |   |          |          |         |   |          |          |         |   |          |          |         |   |          |          |         |   |          |          |         |   |          |          |          |                                                                                                                                                                                                                       |                                                                                                                                                                                                                                                                                                                                                                                                                                                                                                                                                                                                                                                                                                                                                                                                                                                                                                                                                                                                                                                                                                                                                                                                                                                                                                                                                                                                                                                                                                                                                                                                                                                                                                                                                                                                                                                                                                                                                                                                                                                                                                                                                                                                                                                                                                                                                                                                                                                                                                                                                                                                                                                                                                                                                                                                                                                                                                                                         |          |          |          |          |         |         |          |          |         |          |                                                                                                                                                                                                                         |                                                                                                                                                                                                                                                                                                                                                                                                                                                                                                                                                                                                                                                                                                                                                                                                                                                                                                                                                                                                                                                                                                                                                                                                                                                                                                                                                                                                                                                                                                                                                                                                                                                                                                                                                                                                                                                                                                                                                                                                                                                                                                                                                                                                                                                                                                                                                                                                                                                                                                                                                                                                                                                                                                                                                                                                                                                                                                                                                                                                                                                                                                                                                             |   |          |          |          |   |          |          |          |   |          |          |          |   |          |          |          |   |          |          |          |   |          |          |          |   |          |          |          |   |          |         |         |   |          |         |         |   |         |         |         |   |          |         |         |   |          |         |         |   |         |          |          |   |          |          |          |   |         |         |         |   |         |          |          |   |          |          |          |   |          |         |          |   |          |          |          |   |          |          |         |   |          |          |         |   |          |          |          |   |         |          |         |   |         |          |         |   |         |          |          |   |          |          |         |   |          |          |          |   |          |          |          |   |          |          |          |   |          |          |          |   |          |         |          |   |          |         |          |   |          |         |          |   |          |         |          |   |          |         |          |   |         |          |          |   |         |          |          |   |         |         |          |   |         |         |          |   |          |          |         |   |          |          |         |   |          |          |         |   |          |          |         |
| C                                                                                                                                                                                                                      | -2.78765                                                                                                                                                                                                                                                                                                                                                                                                                                                                                                                                                                                                                                                                                                                                                                                                                                                                                                                                                                                                                                                                                                                                                                                                                                                                                                                                                                                                                                                                                                                                                                                                                                                                                                                                                                                                                                                                                                                                                                                                                                                                                                                                                                                                                                                                                                                                                                                                                                                                                                                                                                                                                                                                                                                                                                                                                                                                                                                                                                                                                                                                                                                                                       | -0.20732 | 1.46462  |          |          |   |          |          |          |   |          |          |          |   |          |          |          |   |          |         |          |   |          |          |          |   |          |          |          |   |          |         |          |   |          |         |          |   |         |         |         |   |         |         |         |   |          |         |          |   |          |         |         |   |         |         |         |   |          |         |         |   |         |         |         |   |          |          |          |   |          |          |          |   |         |         |         |   |          |          |         |   |          |         |          |   |         |          |         |   |         |          |          |   |         |          |          |   |         |          |          |   |         |          |          |   |         |          |         |   |         |          |         |   |         |          |         |   |         |         |         |   |          |          |         |   |          |          |         |   |          |          |         |   |          |          |         |   |          |          |         |   |          |          |         |   |          |          |         |   |          |          |         |   |          |          |         |   |          |          |          |                                                                                                                                                                                                                       |                                                                                                                                                                                                                                                                                                                                                                                                                                                                                                                                                                                                                                                                                                                                                                                                                                                                                                                                                                                                                                                                                                                                                                                                                                                                                                                                                                                                                                                                                                                                                                                                                                                                                                                                                                                                                                                                                                                                                                                                                                                                                                                                                                                                                                                                                                                                                                                                                                                                                                                                                                                                                                                                                                                                                                                                                                                                                                                                         |          |          |          |          |         |         |          |          |         |          |                                                                                                                                                                                                                         |                                                                                                                                                                                                                                                                                                                                                                                                                                                                                                                                                                                                                                                                                                                                                                                                                                                                                                                                                                                                                                                                                                                                                                                                                                                                                                                                                                                                                                                                                                                                                                                                                                                                                                                                                                                                                                                                                                                                                                                                                                                                                                                                                                                                                                                                                                                                                                                                                                                                                                                                                                                                                                                                                                                                                                                                                                                                                                                                                                                                                                                                                                                                                             |   |          |          |          |   |          |          |          |   |          |          |          |   |          |          |          |   |          |          |          |   |          |          |          |   |          |          |          |   |          |         |         |   |          |         |         |   |         |         |         |   |          |         |         |   |          |         |         |   |         |          |          |   |          |          |          |   |         |         |         |   |         |          |          |   |          |          |          |   |          |         |          |   |          |          |          |   |          |          |         |   |          |          |         |   |          |          |          |   |         |          |         |   |         |          |         |   |         |          |          |   |          |          |         |   |          |          |          |   |          |          |          |   |          |          |          |   |          |          |          |   |          |         |          |   |          |         |          |   |          |         |          |   |          |         |          |   |          |         |          |   |         |          |          |   |         |          |          |   |         |         |          |   |         |         |          |   |          |          |         |   |          |          |         |   |          |          |         |   |          |          |         |
| H                                                                                                                                                                                                                      | -3.70545                                                                                                                                                                                                                                                                                                                                                                                                                                                                                                                                                                                                                                                                                                                                                                                                                                                                                                                                                                                                                                                                                                                                                                                                                                                                                                                                                                                                                                                                                                                                                                                                                                                                                                                                                                                                                                                                                                                                                                                                                                                                                                                                                                                                                                                                                                                                                                                                                                                                                                                                                                                                                                                                                                                                                                                                                                                                                                                                                                                                                                                                                                                                                       | -0.64275 | 1.06128  |          |          |   |          |          |          |   |          |          |          |   |          |          |          |   |          |         |          |   |          |          |          |   |          |          |          |   |          |         |          |   |          |         |          |   |         |         |         |   |         |         |         |   |          |         |          |   |          |         |         |   |         |         |         |   |          |         |         |   |         |         |         |   |          |          |          |   |          |          |          |   |         |         |         |   |          |          |         |   |          |         |          |   |         |          |         |   |         |          |          |   |         |          |          |   |         |          |          |   |         |          |          |   |         |          |         |   |         |          |         |   |         |          |         |   |         |         |         |   |          |          |         |   |          |          |         |   |          |          |         |   |          |          |         |   |          |          |         |   |          |          |         |   |          |          |         |   |          |          |         |   |          |          |         |   |          |          |          |                                                                                                                                                                                                                       |                                                                                                                                                                                                                                                                                                                                                                                                                                                                                                                                                                                                                                                                                                                                                                                                                                                                                                                                                                                                                                                                                                                                                                                                                                                                                                                                                                                                                                                                                                                                                                                                                                                                                                                                                                                                                                                                                                                                                                                                                                                                                                                                                                                                                                                                                                                                                                                                                                                                                                                                                                                                                                                                                                                                                                                                                                                                                                                                         |          |          |          |          |         |         |          |          |         |          |                                                                                                                                                                                                                         |                                                                                                                                                                                                                                                                                                                                                                                                                                                                                                                                                                                                                                                                                                                                                                                                                                                                                                                                                                                                                                                                                                                                                                                                                                                                                                                                                                                                                                                                                                                                                                                                                                                                                                                                                                                                                                                                                                                                                                                                                                                                                                                                                                                                                                                                                                                                                                                                                                                                                                                                                                                                                                                                                                                                                                                                                                                                                                                                                                                                                                                                                                                                                             |   |          |          |          |   |          |          |          |   |          |          |          |   |          |          |          |   |          |          |          |   |          |          |          |   |          |          |          |   |          |         |         |   |          |         |         |   |         |         |         |   |          |         |         |   |          |         |         |   |         |          |          |   |          |          |          |   |         |         |         |   |         |          |          |   |          |          |          |   |          |         |          |   |          |          |          |   |          |          |         |   |          |          |         |   |          |          |          |   |         |          |         |   |         |          |         |   |         |          |          |   |          |          |         |   |          |          |          |   |          |          |          |   |          |          |          |   |          |          |          |   |          |         |          |   |          |         |          |   |          |         |          |   |          |         |          |   |          |         |          |   |         |          |          |   |         |          |          |   |         |         |          |   |         |         |          |   |          |          |         |   |          |          |         |   |          |          |         |   |          |          |         |
| H                                                                                                                                                                                                                      | -2.74904                                                                                                                                                                                                                                                                                                                                                                                                                                                                                                                                                                                                                                                                                                                                                                                                                                                                                                                                                                                                                                                                                                                                                                                                                                                                                                                                                                                                                                                                                                                                                                                                                                                                                                                                                                                                                                                                                                                                                                                                                                                                                                                                                                                                                                                                                                                                                                                                                                                                                                                                                                                                                                                                                                                                                                                                                                                                                                                                                                                                                                                                                                                                                       | 0.84400  | 1.17588  |          |          |   |          |          |          |   |          |          |          |   |          |          |          |   |          |         |          |   |          |          |          |   |          |          |          |   |          |         |          |   |          |         |          |   |         |         |         |   |         |         |         |   |          |         |          |   |          |         |         |   |         |         |         |   |          |         |         |   |         |         |         |   |          |          |          |   |          |          |          |   |         |         |         |   |          |          |         |   |          |         |          |   |         |          |         |   |         |          |          |   |         |          |          |   |         |          |          |   |         |          |          |   |         |          |         |   |         |          |         |   |         |          |         |   |         |         |         |   |          |          |         |   |          |          |         |   |          |          |         |   |          |          |         |   |          |          |         |   |          |          |         |   |          |          |         |   |          |          |         |   |          |          |         |   |          |          |          |                                                                                                                                                                                                                       |                                                                                                                                                                                                                                                                                                                                                                                                                                                                                                                                                                                                                                                                                                                                                                                                                                                                                                                                                                                                                                                                                                                                                                                                                                                                                                                                                                                                                                                                                                                                                                                                                                                                                                                                                                                                                                                                                                                                                                                                                                                                                                                                                                                                                                                                                                                                                                                                                                                                                                                                                                                                                                                                                                                                                                                                                                                                                                                                         |          |          |          |          |         |         |          |          |         |          |                                                                                                                                                                                                                         |                                                                                                                                                                                                                                                                                                                                                                                                                                                                                                                                                                                                                                                                                                                                                                                                                                                                                                                                                                                                                                                                                                                                                                                                                                                                                                                                                                                                                                                                                                                                                                                                                                                                                                                                                                                                                                                                                                                                                                                                                                                                                                                                                                                                                                                                                                                                                                                                                                                                                                                                                                                                                                                                                                                                                                                                                                                                                                                                                                                                                                                                                                                                                             |   |          |          |          |   |          |          |          |   |          |          |          |   |          |          |          |   |          |          |          |   |          |          |          |   |          |          |          |   |          |         |         |   |          |         |         |   |         |         |         |   |          |         |         |   |          |         |         |   |         |          |          |   |          |          |          |   |         |         |         |   |         |          |          |   |          |          |          |   |          |         |          |   |          |          |          |   |          |          |         |   |          |          |         |   |          |          |          |   |         |          |         |   |         |          |         |   |         |          |          |   |          |          |         |   |          |          |          |   |          |          |          |   |          |          |          |   |          |          |          |   |          |         |          |   |          |         |          |   |          |         |          |   |          |         |          |   |          |         |          |   |         |          |          |   |         |          |          |   |         |         |          |   |         |         |          |   |          |          |         |   |          |          |         |   |          |          |         |   |          |          |         |
| H                                                                                                                                                                                                                      | -2.82744                                                                                                                                                                                                                                                                                                                                                                                                                                                                                                                                                                                                                                                                                                                                                                                                                                                                                                                                                                                                                                                                                                                                                                                                                                                                                                                                                                                                                                                                                                                                                                                                                                                                                                                                                                                                                                                                                                                                                                                                                                                                                                                                                                                                                                                                                                                                                                                                                                                                                                                                                                                                                                                                                                                                                                                                                                                                                                                                                                                                                                                                                                                                                       | -0.26714 | 2.55523  |          |          |   |          |          |          |   |          |          |          |   |          |          |          |   |          |         |          |   |          |          |          |   |          |          |          |   |          |         |          |   |          |         |          |   |         |         |         |   |         |         |         |   |          |         |          |   |          |         |         |   |         |         |         |   |          |         |         |   |         |         |         |   |          |          |          |   |          |          |          |   |         |         |         |   |          |          |         |   |          |         |          |   |         |          |         |   |         |          |          |   |         |          |          |   |         |          |          |   |         |          |          |   |         |          |         |   |         |          |         |   |         |          |         |   |         |         |         |   |          |          |         |   |          |          |         |   |          |          |         |   |          |          |         |   |          |          |         |   |          |          |         |   |          |          |         |   |          |          |         |   |          |          |         |   |          |          |          |                                                                                                                                                                                                                       |                                                                                                                                                                                                                                                                                                                                                                                                                                                                                                                                                                                                                                                                                                                                                                                                                                                                                                                                                                                                                                                                                                                                                                                                                                                                                                                                                                                                                                                                                                                                                                                                                                                                                                                                                                                                                                                                                                                                                                                                                                                                                                                                                                                                                                                                                                                                                                                                                                                                                                                                                                                                                                                                                                                                                                                                                                                                                                                                         |          |          |          |          |         |         |          |          |         |          |                                                                                                                                                                                                                         |                                                                                                                                                                                                                                                                                                                                                                                                                                                                                                                                                                                                                                                                                                                                                                                                                                                                                                                                                                                                                                                                                                                                                                                                                                                                                                                                                                                                                                                                                                                                                                                                                                                                                                                                                                                                                                                                                                                                                                                                                                                                                                                                                                                                                                                                                                                                                                                                                                                                                                                                                                                                                                                                                                                                                                                                                                                                                                                                                                                                                                                                                                                                                             |   |          |          |          |   |          |          |          |   |          |          |          |   |          |          |          |   |          |          |          |   |          |          |          |   |          |          |          |   |          |         |         |   |          |         |         |   |         |         |         |   |          |         |         |   |          |         |         |   |         |          |          |   |          |          |          |   |         |         |         |   |         |          |          |   |          |          |          |   |          |         |          |   |          |          |          |   |          |          |         |   |          |          |         |   |          |          |          |   |         |          |         |   |         |          |         |   |         |          |          |   |          |          |         |   |          |          |          |   |          |          |          |   |          |          |          |   |          |          |          |   |          |         |          |   |          |         |          |   |          |         |          |   |          |         |          |   |          |         |          |   |         |          |          |   |         |          |          |   |         |         |          |   |         |         |          |   |          |          |         |   |          |          |         |   |          |          |         |   |          |          |         |
| C                                                                                                                                                                                                                      | 3.47710                                                                                                                                                                                                                                                                                                                                                                                                                                                                                                                                                                                                                                                                                                                                                                                                                                                                                                                                                                                                                                                                                                                                                                                                                                                                                                                                                                                                                                                                                                                                                                                                                                                                                                                                                                                                                                                                                                                                                                                                                                                                                                                                                                                                                                                                                                                                                                                                                                                                                                                                                                                                                                                                                                                                                                                                                                                                                                                                                                                                                                                                                                                                                        | 0.44011  | -0.29359 |          |          |   |          |          |          |   |          |          |          |   |          |          |          |   |          |         |          |   |          |          |          |   |          |          |          |   |          |         |          |   |          |         |          |   |         |         |         |   |         |         |         |   |          |         |          |   |          |         |         |   |         |         |         |   |          |         |         |   |         |         |         |   |          |          |          |   |          |          |          |   |         |         |         |   |          |          |         |   |          |         |          |   |         |          |         |   |         |          |          |   |         |          |          |   |         |          |          |   |         |          |          |   |         |          |         |   |         |          |         |   |         |          |         |   |         |         |         |   |          |          |         |   |          |          |         |   |          |          |         |   |          |          |         |   |          |          |         |   |          |          |         |   |          |          |         |   |          |          |         |   |          |          |         |   |          |          |          |                                                                                                                                                                                                                       |                                                                                                                                                                                                                                                                                                                                                                                                                                                                                                                                                                                                                                                                                                                                                                                                                                                                                                                                                                                                                                                                                                                                                                                                                                                                                                                                                                                                                                                                                                                                                                                                                                                                                                                                                                                                                                                                                                                                                                                                                                                                                                                                                                                                                                                                                                                                                                                                                                                                                                                                                                                                                                                                                                                                                                                                                                                                                                                                         |          |          |          |          |         |         |          |          |         |          |                                                                                                                                                                                                                         |                                                                                                                                                                                                                                                                                                                                                                                                                                                                                                                                                                                                                                                                                                                                                                                                                                                                                                                                                                                                                                                                                                                                                                                                                                                                                                                                                                                                                                                                                                                                                                                                                                                                                                                                                                                                                                                                                                                                                                                                                                                                                                                                                                                                                                                                                                                                                                                                                                                                                                                                                                                                                                                                                                                                                                                                                                                                                                                                                                                                                                                                                                                                                             |   |          |          |          |   |          |          |          |   |          |          |          |   |          |          |          |   |          |          |          |   |          |          |          |   |          |          |          |   |          |         |         |   |          |         |         |   |         |         |         |   |          |         |         |   |          |         |         |   |         |          |          |   |          |          |          |   |         |         |         |   |         |          |          |   |          |          |          |   |          |         |          |   |          |          |          |   |          |          |         |   |          |          |         |   |          |          |          |   |         |          |         |   |         |          |         |   |         |          |          |   |          |          |         |   |          |          |          |   |          |          |          |   |          |          |          |   |          |          |          |   |          |         |          |   |          |         |          |   |          |         |          |   |          |         |          |   |          |         |          |   |         |          |          |   |         |          |          |   |         |         |          |   |         |         |          |   |          |          |         |   |          |          |         |   |          |          |         |   |          |          |         |
| H                                                                                                                                                                                                                      | 4.18444                                                                                                                                                                                                                                                                                                                                                                                                                                                                                                                                                                                                                                                                                                                                                                                                                                                                                                                                                                                                                                                                                                                                                                                                                                                                                                                                                                                                                                                                                                                                                                                                                                                                                                                                                                                                                                                                                                                                                                                                                                                                                                                                                                                                                                                                                                                                                                                                                                                                                                                                                                                                                                                                                                                                                                                                                                                                                                                                                                                                                                                                                                                                                        | -0.39256 | -0.30423 |          |          |   |          |          |          |   |          |          |          |   |          |          |          |   |          |         |          |   |          |          |          |   |          |          |          |   |          |         |          |   |          |         |          |   |         |         |         |   |         |         |         |   |          |         |          |   |          |         |         |   |         |         |         |   |          |         |         |   |         |         |         |   |          |          |          |   |          |          |          |   |         |         |         |   |          |          |         |   |          |         |          |   |         |          |         |   |         |          |          |   |         |          |          |   |         |          |          |   |         |          |          |   |         |          |         |   |         |          |         |   |         |          |         |   |         |         |         |   |          |          |         |   |          |          |         |   |          |          |         |   |          |          |         |   |          |          |         |   |          |          |         |   |          |          |         |   |          |          |         |   |          |          |         |   |          |          |          |                                                                                                                                                                                                                       |                                                                                                                                                                                                                                                                                                                                                                                                                                                                                                                                                                                                                                                                                                                                                                                                                                                                                                                                                                                                                                                                                                                                                                                                                                                                                                                                                                                                                                                                                                                                                                                                                                                                                                                                                                                                                                                                                                                                                                                                                                                                                                                                                                                                                                                                                                                                                                                                                                                                                                                                                                                                                                                                                                                                                                                                                                                                                                                                         |          |          |          |          |         |         |          |          |         |          |                                                                                                                                                                                                                         |                                                                                                                                                                                                                                                                                                                                                                                                                                                                                                                                                                                                                                                                                                                                                                                                                                                                                                                                                                                                                                                                                                                                                                                                                                                                                                                                                                                                                                                                                                                                                                                                                                                                                                                                                                                                                                                                                                                                                                                                                                                                                                                                                                                                                                                                                                                                                                                                                                                                                                                                                                                                                                                                                                                                                                                                                                                                                                                                                                                                                                                                                                                                                             |   |          |          |          |   |          |          |          |   |          |          |          |   |          |          |          |   |          |          |          |   |          |          |          |   |          |          |          |   |          |         |         |   |          |         |         |   |         |         |         |   |          |         |         |   |          |         |         |   |         |          |          |   |          |          |          |   |         |         |         |   |         |          |          |   |          |          |          |   |          |         |          |   |          |          |          |   |          |          |         |   |          |          |         |   |          |          |          |   |         |          |         |   |         |          |         |   |         |          |          |   |          |          |         |   |          |          |          |   |          |          |          |   |          |          |          |   |          |          |          |   |          |         |          |   |          |         |          |   |          |         |          |   |          |         |          |   |          |         |          |   |         |          |          |   |         |          |          |   |         |         |          |   |         |         |          |   |          |          |         |   |          |          |         |   |          |          |         |   |          |          |         |
| H                                                                                                                                                                                                                      | 3.90348                                                                                                                                                                                                                                                                                                                                                                                                                                                                                                                                                                                                                                                                                                                                                                                                                                                                                                                                                                                                                                                                                                                                                                                                                                                                                                                                                                                                                                                                                                                                                                                                                                                                                                                                                                                                                                                                                                                                                                                                                                                                                                                                                                                                                                                                                                                                                                                                                                                                                                                                                                                                                                                                                                                                                                                                                                                                                                                                                                                                                                                                                                                                                        | 1.24017  | 0.31107  |          |          |   |          |          |          |   |          |          |          |   |          |          |          |   |          |         |          |   |          |          |          |   |          |          |          |   |          |         |          |   |          |         |          |   |         |         |         |   |         |         |         |   |          |         |          |   |          |         |         |   |         |         |         |   |          |         |         |   |         |         |         |   |          |          |          |   |          |          |          |   |         |         |         |   |          |          |         |   |          |         |          |   |         |          |         |   |         |          |          |   |         |          |          |   |         |          |          |   |         |          |          |   |         |          |         |   |         |          |         |   |         |          |         |   |         |         |         |   |          |          |         |   |          |          |         |   |          |          |         |   |          |          |         |   |          |          |         |   |          |          |         |   |          |          |         |   |          |          |         |   |          |          |         |   |          |          |          |                                                                                                                                                                                                                       |                                                                                                                                                                                                                                                                                                                                                                                                                                                                                                                                                                                                                                                                                                                                                                                                                                                                                                                                                                                                                                                                                                                                                                                                                                                                                                                                                                                                                                                                                                                                                                                                                                                                                                                                                                                                                                                                                                                                                                                                                                                                                                                                                                                                                                                                                                                                                                                                                                                                                                                                                                                                                                                                                                                                                                                                                                                                                                                                         |          |          |          |          |         |         |          |          |         |          |                                                                                                                                                                                                                         |                                                                                                                                                                                                                                                                                                                                                                                                                                                                                                                                                                                                                                                                                                                                                                                                                                                                                                                                                                                                                                                                                                                                                                                                                                                                                                                                                                                                                                                                                                                                                                                                                                                                                                                                                                                                                                                                                                                                                                                                                                                                                                                                                                                                                                                                                                                                                                                                                                                                                                                                                                                                                                                                                                                                                                                                                                                                                                                                                                                                                                                                                                                                                             |   |          |          |          |   |          |          |          |   |          |          |          |   |          |          |          |   |          |          |          |   |          |          |          |   |          |          |          |   |          |         |         |   |          |         |         |   |         |         |         |   |          |         |         |   |          |         |         |   |         |          |          |   |          |          |          |   |         |         |         |   |         |          |          |   |          |          |          |   |          |         |          |   |          |          |          |   |          |          |         |   |          |          |         |   |          |          |          |   |         |          |         |   |         |          |         |   |         |          |          |   |          |          |         |   |          |          |          |   |          |          |          |   |          |          |          |   |          |          |          |   |          |         |          |   |          |         |          |   |          |         |          |   |          |         |          |   |          |         |          |   |         |          |          |   |         |          |          |   |         |         |          |   |         |         |          |   |          |          |         |   |          |          |         |   |          |          |         |   |          |          |         |
| H                                                                                                                                                                                                                      | 3.36287                                                                                                                                                                                                                                                                                                                                                                                                                                                                                                                                                                                                                                                                                                                                                                                                                                                                                                                                                                                                                                                                                                                                                                                                                                                                                                                                                                                                                                                                                                                                                                                                                                                                                                                                                                                                                                                                                                                                                                                                                                                                                                                                                                                                                                                                                                                                                                                                                                                                                                                                                                                                                                                                                                                                                                                                                                                                                                                                                                                                                                                                                                                                                        | 0.80871  | -1.31524 |          |          |   |          |          |          |   |          |          |          |   |          |          |          |   |          |         |          |   |          |          |          |   |          |          |          |   |          |         |          |   |          |         |          |   |         |         |         |   |         |         |         |   |          |         |          |   |          |         |         |   |         |         |         |   |          |         |         |   |         |         |         |   |          |          |          |   |          |          |          |   |         |         |         |   |          |          |         |   |          |         |          |   |         |          |         |   |         |          |          |   |         |          |          |   |         |          |          |   |         |          |          |   |         |          |         |   |         |          |         |   |         |          |         |   |         |         |         |   |          |          |         |   |          |          |         |   |          |          |         |   |          |          |         |   |          |          |         |   |          |          |         |   |          |          |         |   |          |          |         |   |          |          |         |   |          |          |          |                                                                                                                                                                                                                       |                                                                                                                                                                                                                                                                                                                                                                                                                                                                                                                                                                                                                                                                                                                                                                                                                                                                                                                                                                                                                                                                                                                                                                                                                                                                                                                                                                                                                                                                                                                                                                                                                                                                                                                                                                                                                                                                                                                                                                                                                                                                                                                                                                                                                                                                                                                                                                                                                                                                                                                                                                                                                                                                                                                                                                                                                                                                                                                                         |          |          |          |          |         |         |          |          |         |          |                                                                                                                                                                                                                         |                                                                                                                                                                                                                                                                                                                                                                                                                                                                                                                                                                                                                                                                                                                                                                                                                                                                                                                                                                                                                                                                                                                                                                                                                                                                                                                                                                                                                                                                                                                                                                                                                                                                                                                                                                                                                                                                                                                                                                                                                                                                                                                                                                                                                                                                                                                                                                                                                                                                                                                                                                                                                                                                                                                                                                                                                                                                                                                                                                                                                                                                                                                                                             |   |          |          |          |   |          |          |          |   |          |          |          |   |          |          |          |   |          |          |          |   |          |          |          |   |          |          |          |   |          |         |         |   |          |         |         |   |         |         |         |   |          |         |         |   |          |         |         |   |         |          |          |   |          |          |          |   |         |         |         |   |         |          |          |   |          |          |          |   |          |         |          |   |          |          |          |   |          |          |         |   |          |          |         |   |          |          |          |   |         |          |         |   |         |          |         |   |         |          |          |   |          |          |         |   |          |          |          |   |          |          |          |   |          |          |          |   |          |          |          |   |          |         |          |   |          |         |          |   |          |         |          |   |          |         |          |   |          |         |          |   |         |          |          |   |         |          |          |   |         |         |          |   |         |         |          |   |          |          |         |   |          |          |         |   |          |          |         |   |          |          |         |
| C                                                                                                                                                                                                                      | -0.57142                                                                                                                                                                                                                                                                                                                                                                                                                                                                                                                                                                                                                                                                                                                                                                                                                                                                                                                                                                                                                                                                                                                                                                                                                                                                                                                                                                                                                                                                                                                                                                                                                                                                                                                                                                                                                                                                                                                                                                                                                                                                                                                                                                                                                                                                                                                                                                                                                                                                                                                                                                                                                                                                                                                                                                                                                                                                                                                                                                                                                                                                                                                                                       | -2.24432 | -2.68543 |          |          |   |          |          |          |   |          |          |          |   |          |          |          |   |          |         |          |   |          |          |          |   |          |          |          |   |          |         |          |   |          |         |          |   |         |         |         |   |         |         |         |   |          |         |          |   |          |         |         |   |         |         |         |   |          |         |         |   |         |         |         |   |          |          |          |   |          |          |          |   |         |         |         |   |          |          |         |   |          |         |          |   |         |          |         |   |         |          |          |   |         |          |          |   |         |          |          |   |         |          |          |   |         |          |         |   |         |          |         |   |         |          |         |   |         |         |         |   |          |          |         |   |          |          |         |   |          |          |         |   |          |          |         |   |          |          |         |   |          |          |         |   |          |          |         |   |          |          |         |   |          |          |         |   |          |          |          |                                                                                                                                                                                                                       |                                                                                                                                                                                                                                                                                                                                                                                                                                                                                                                                                                                                                                                                                                                                                                                                                                                                                                                                                                                                                                                                                                                                                                                                                                                                                                                                                                                                                                                                                                                                                                                                                                                                                                                                                                                                                                                                                                                                                                                                                                                                                                                                                                                                                                                                                                                                                                                                                                                                                                                                                                                                                                                                                                                                                                                                                                                                                                                                         |          |          |          |          |         |         |          |          |         |          |                                                                                                                                                                                                                         |                                                                                                                                                                                                                                                                                                                                                                                                                                                                                                                                                                                                                                                                                                                                                                                                                                                                                                                                                                                                                                                                                                                                                                                                                                                                                                                                                                                                                                                                                                                                                                                                                                                                                                                                                                                                                                                                                                                                                                                                                                                                                                                                                                                                                                                                                                                                                                                                                                                                                                                                                                                                                                                                                                                                                                                                                                                                                                                                                                                                                                                                                                                                                             |   |          |          |          |   |          |          |          |   |          |          |          |   |          |          |          |   |          |          |          |   |          |          |          |   |          |          |          |   |          |         |         |   |          |         |         |   |         |         |         |   |          |         |         |   |          |         |         |   |         |          |          |   |          |          |          |   |         |         |         |   |         |          |          |   |          |          |          |   |          |         |          |   |          |          |          |   |          |          |         |   |          |          |         |   |          |          |          |   |         |          |         |   |         |          |         |   |         |          |          |   |          |          |         |   |          |          |          |   |          |          |          |   |          |          |          |   |          |          |          |   |          |         |          |   |          |         |          |   |          |         |          |   |          |         |          |   |          |         |          |   |         |          |          |   |         |          |          |   |         |         |          |   |         |         |          |   |          |          |         |   |          |          |         |   |          |          |         |   |          |          |         |
| C                                                                                                                                                                                                                      | -0.03202                                                                                                                                                                                                                                                                                                                                                                                                                                                                                                                                                                                                                                                                                                                                                                                                                                                                                                                                                                                                                                                                                                                                                                                                                                                                                                                                                                                                                                                                                                                                                                                                                                                                                                                                                                                                                                                                                                                                                                                                                                                                                                                                                                                                                                                                                                                                                                                                                                                                                                                                                                                                                                                                                                                                                                                                                                                                                                                                                                                                                                                                                                                                                       | -0.42580 | -0.56201 |          |          |   |          |          |          |   |          |          |          |   |          |          |          |   |          |         |          |   |          |          |          |   |          |          |          |   |          |         |          |   |          |         |          |   |         |         |         |   |         |         |         |   |          |         |          |   |          |         |         |   |         |         |         |   |          |         |         |   |         |         |         |   |          |          |          |   |          |          |          |   |         |         |         |   |          |          |         |   |          |         |          |   |         |          |         |   |         |          |          |   |         |          |          |   |         |          |          |   |         |          |          |   |         |          |         |   |         |          |         |   |         |          |         |   |         |         |         |   |          |          |         |   |          |          |         |   |          |          |         |   |          |          |         |   |          |          |         |   |          |          |         |   |          |          |         |   |          |          |         |   |          |          |         |   |          |          |          |                                                                                                                                                                                                                       |                                                                                                                                                                                                                                                                                                                                                                                                                                                                                                                                                                                                                                                                                                                                                                                                                                                                                                                                                                                                                                                                                                                                                                                                                                                                                                                                                                                                                                                                                                                                                                                                                                                                                                                                                                                                                                                                                                                                                                                                                                                                                                                                                                                                                                                                                                                                                                                                                                                                                                                                                                                                                                                                                                                                                                                                                                                                                                                                         |          |          |          |          |         |         |          |          |         |          |                                                                                                                                                                                                                         |                                                                                                                                                                                                                                                                                                                                                                                                                                                                                                                                                                                                                                                                                                                                                                                                                                                                                                                                                                                                                                                                                                                                                                                                                                                                                                                                                                                                                                                                                                                                                                                                                                                                                                                                                                                                                                                                                                                                                                                                                                                                                                                                                                                                                                                                                                                                                                                                                                                                                                                                                                                                                                                                                                                                                                                                                                                                                                                                                                                                                                                                                                                                                             |   |          |          |          |   |          |          |          |   |          |          |          |   |          |          |          |   |          |          |          |   |          |          |          |   |          |          |          |   |          |         |         |   |          |         |         |   |         |         |         |   |          |         |         |   |          |         |         |   |         |          |          |   |          |          |          |   |         |         |         |   |         |          |          |   |          |          |          |   |          |         |          |   |          |          |          |   |          |          |         |   |          |          |         |   |          |          |          |   |         |          |         |   |         |          |         |   |         |          |          |   |          |          |         |   |          |          |          |   |          |          |          |   |          |          |          |   |          |          |          |   |          |         |          |   |          |         |          |   |          |         |          |   |          |         |          |   |          |         |          |   |         |          |          |   |         |          |          |   |         |         |          |   |         |         |          |   |          |          |         |   |          |          |         |   |          |          |         |   |          |          |         |
| C                                                                                                                                                                                                                      | -0.64379                                                                                                                                                                                                                                                                                                                                                                                                                                                                                                                                                                                                                                                                                                                                                                                                                                                                                                                                                                                                                                                                                                                                                                                                                                                                                                                                                                                                                                                                                                                                                                                                                                                                                                                                                                                                                                                                                                                                                                                                                                                                                                                                                                                                                                                                                                                                                                                                                                                                                                                                                                                                                                                                                                                                                                                                                                                                                                                                                                                                                                                                                                                                                       | -2.62960 | -1.35577 |          |          |   |          |          |          |   |          |          |          |   |          |          |          |   |          |         |          |   |          |          |          |   |          |          |          |   |          |         |          |   |          |         |          |   |         |         |         |   |         |         |         |   |          |         |          |   |          |         |         |   |         |         |         |   |          |         |         |   |         |         |         |   |          |          |          |   |          |          |          |   |         |         |         |   |          |          |         |   |          |         |          |   |         |          |         |   |         |          |          |   |         |          |          |   |         |          |          |   |         |          |          |   |         |          |         |   |         |          |         |   |         |          |         |   |         |         |         |   |          |          |         |   |          |          |         |   |          |          |         |   |          |          |         |   |          |          |         |   |          |          |         |   |          |          |         |   |          |          |         |   |          |          |         |   |          |          |          |                                                                                                                                                                                                                       |                                                                                                                                                                                                                                                                                                                                                                                                                                                                                                                                                                                                                                                                                                                                                                                                                                                                                                                                                                                                                                                                                                                                                                                                                                                                                                                                                                                                                                                                                                                                                                                                                                                                                                                                                                                                                                                                                                                                                                                                                                                                                                                                                                                                                                                                                                                                                                                                                                                                                                                                                                                                                                                                                                                                                                                                                                                                                                                                         |          |          |          |          |         |         |          |          |         |          |                                                                                                                                                                                                                         |                                                                                                                                                                                                                                                                                                                                                                                                                                                                                                                                                                                                                                                                                                                                                                                                                                                                                                                                                                                                                                                                                                                                                                                                                                                                                                                                                                                                                                                                                                                                                                                                                                                                                                                                                                                                                                                                                                                                                                                                                                                                                                                                                                                                                                                                                                                                                                                                                                                                                                                                                                                                                                                                                                                                                                                                                                                                                                                                                                                                                                                                                                                                                             |   |          |          |          |   |          |          |          |   |          |          |          |   |          |          |          |   |          |          |          |   |          |          |          |   |          |          |          |   |          |         |         |   |          |         |         |   |         |         |         |   |          |         |         |   |          |         |         |   |         |          |          |   |          |          |          |   |         |         |         |   |         |          |          |   |          |          |          |   |          |         |          |   |          |          |          |   |          |          |         |   |          |          |         |   |          |          |          |   |         |          |         |   |         |          |         |   |         |          |          |   |          |          |         |   |          |          |          |   |          |          |          |   |          |          |          |   |          |          |          |   |          |         |          |   |          |         |          |   |          |         |          |   |          |         |          |   |          |         |          |   |         |          |          |   |         |          |          |   |         |         |          |   |         |         |          |   |          |          |         |   |          |          |         |   |          |          |         |   |          |          |         |
| C                                                                                                                                                                                                                      | -0.00499                                                                                                                                                                                                                                                                                                                                                                                                                                                                                                                                                                                                                                                                                                                                                                                                                                                                                                                                                                                                                                                                                                                                                                                                                                                                                                                                                                                                                                                                                                                                                                                                                                                                                                                                                                                                                                                                                                                                                                                                                                                                                                                                                                                                                                                                                                                                                                                                                                                                                                                                                                                                                                                                                                                                                                                                                                                                                                                                                                                                                                                                                                                                                       | -1.01481 | -2.96625 |          |          |   |          |          |          |   |          |          |          |   |          |          |          |   |          |         |          |   |          |          |          |   |          |          |          |   |          |         |          |   |          |         |          |   |         |         |         |   |         |         |         |   |          |         |          |   |          |         |         |   |         |         |         |   |          |         |         |   |         |         |         |   |          |          |          |   |          |          |          |   |         |         |         |   |          |          |         |   |          |         |          |   |         |          |         |   |         |          |          |   |         |          |          |   |         |          |          |   |         |          |          |   |         |          |         |   |         |          |         |   |         |          |         |   |         |         |         |   |          |          |         |   |          |          |         |   |          |          |         |   |          |          |         |   |          |          |         |   |          |          |         |   |          |          |         |   |          |          |         |   |          |          |         |   |          |          |          |                                                                                                                                                                                                                       |                                                                                                                                                                                                                                                                                                                                                                                                                                                                                                                                                                                                                                                                                                                                                                                                                                                                                                                                                                                                                                                                                                                                                                                                                                                                                                                                                                                                                                                                                                                                                                                                                                                                                                                                                                                                                                                                                                                                                                                                                                                                                                                                                                                                                                                                                                                                                                                                                                                                                                                                                                                                                                                                                                                                                                                                                                                                                                                                         |          |          |          |          |         |         |          |          |         |          |                                                                                                                                                                                                                         |                                                                                                                                                                                                                                                                                                                                                                                                                                                                                                                                                                                                                                                                                                                                                                                                                                                                                                                                                                                                                                                                                                                                                                                                                                                                                                                                                                                                                                                                                                                                                                                                                                                                                                                                                                                                                                                                                                                                                                                                                                                                                                                                                                                                                                                                                                                                                                                                                                                                                                                                                                                                                                                                                                                                                                                                                                                                                                                                                                                                                                                                                                                                                             |   |          |          |          |   |          |          |          |   |          |          |          |   |          |          |          |   |          |          |          |   |          |          |          |   |          |          |          |   |          |         |         |   |          |         |         |   |         |         |         |   |          |         |         |   |          |         |         |   |         |          |          |   |          |          |          |   |         |         |         |   |         |          |          |   |          |          |          |   |          |         |          |   |          |          |          |   |          |          |         |   |          |          |         |   |          |          |          |   |         |          |         |   |         |          |         |   |         |          |          |   |          |          |         |   |          |          |          |   |          |          |          |   |          |          |          |   |          |          |          |   |          |         |          |   |          |         |          |   |          |         |          |   |          |         |          |   |          |         |          |   |         |          |          |   |         |          |          |   |         |         |          |   |         |         |          |   |          |          |         |   |          |          |         |   |          |          |         |   |          |          |         |
| C                                                                                                                                                                                                                      | 0.24864                                                                                                                                                                                                                                                                                                                                                                                                                                                                                                                                                                                                                                                                                                                                                                                                                                                                                                                                                                                                                                                                                                                                                                                                                                                                                                                                                                                                                                                                                                                                                                                                                                                                                                                                                                                                                                                                                                                                                                                                                                                                                                                                                                                                                                                                                                                                                                                                                                                                                                                                                                                                                                                                                                                                                                                                                                                                                                                                                                                                                                                                                                                                                        | -0.14980 | -1.91604 |          |          |   |          |          |          |   |          |          |          |   |          |          |          |   |          |         |          |   |          |          |          |   |          |          |          |   |          |         |          |   |          |         |          |   |         |         |         |   |         |         |         |   |          |         |          |   |          |         |         |   |         |         |         |   |          |         |         |   |         |         |         |   |          |          |          |   |          |          |          |   |         |         |         |   |          |          |         |   |          |         |          |   |         |          |         |   |         |          |          |   |         |          |          |   |         |          |          |   |         |          |          |   |         |          |         |   |         |          |         |   |         |          |         |   |         |         |         |   |          |          |         |   |          |          |         |   |          |          |         |   |          |          |         |   |          |          |         |   |          |          |         |   |          |          |         |   |          |          |         |   |          |          |         |   |          |          |          |                                                                                                                                                                                                                       |                                                                                                                                                                                                                                                                                                                                                                                                                                                                                                                                                                                                                                                                                                                                                                                                                                                                                                                                                                                                                                                                                                                                                                                                                                                                                                                                                                                                                                                                                                                                                                                                                                                                                                                                                                                                                                                                                                                                                                                                                                                                                                                                                                                                                                                                                                                                                                                                                                                                                                                                                                                                                                                                                                                                                                                                                                                                                                                                         |          |          |          |          |         |         |          |          |         |          |                                                                                                                                                                                                                         |                                                                                                                                                                                                                                                                                                                                                                                                                                                                                                                                                                                                                                                                                                                                                                                                                                                                                                                                                                                                                                                                                                                                                                                                                                                                                                                                                                                                                                                                                                                                                                                                                                                                                                                                                                                                                                                                                                                                                                                                                                                                                                                                                                                                                                                                                                                                                                                                                                                                                                                                                                                                                                                                                                                                                                                                                                                                                                                                                                                                                                                                                                                                                             |   |          |          |          |   |          |          |          |   |          |          |          |   |          |          |          |   |          |          |          |   |          |          |          |   |          |          |          |   |          |         |         |   |          |         |         |   |         |         |         |   |          |         |         |   |          |         |         |   |         |          |          |   |          |          |          |   |         |         |         |   |         |          |          |   |          |          |          |   |          |         |          |   |          |          |          |   |          |          |         |   |          |          |         |   |          |          |          |   |         |          |         |   |         |          |         |   |         |          |          |   |          |          |         |   |          |          |          |   |          |          |          |   |          |          |          |   |          |          |          |   |          |         |          |   |          |         |          |   |          |         |          |   |          |         |          |   |          |         |          |   |         |          |          |   |         |          |          |   |         |         |          |   |         |         |          |   |          |          |         |   |          |          |         |   |          |          |         |   |          |          |         |
| C                                                                                                                                                                                                                      | -0.27239                                                                                                                                                                                                                                                                                                                                                                                                                                                                                                                                                                                                                                                                                                                                                                                                                                                                                                                                                                                                                                                                                                                                                                                                                                                                                                                                                                                                                                                                                                                                                                                                                                                                                                                                                                                                                                                                                                                                                                                                                                                                                                                                                                                                                                                                                                                                                                                                                                                                                                                                                                                                                                                                                                                                                                                                                                                                                                                                                                                                                                                                                                                                                       | -1.82291 | -0.27085 |          |          |   |          |          |          |   |          |          |          |   |          |          |          |   |          |         |          |   |          |          |          |   |          |          |          |   |          |         |          |   |          |         |          |   |         |         |         |   |         |         |         |   |          |         |          |   |          |         |         |   |         |         |         |   |          |         |         |   |         |         |         |   |          |          |          |   |          |          |          |   |         |         |         |   |          |          |         |   |          |         |          |   |         |          |         |   |         |          |          |   |         |          |          |   |         |          |          |   |         |          |          |   |         |          |         |   |         |          |         |   |         |          |         |   |         |         |         |   |          |          |         |   |          |          |         |   |          |          |         |   |          |          |         |   |          |          |         |   |          |          |         |   |          |          |         |   |          |          |         |   |          |          |         |   |          |          |          |                                                                                                                                                                                                                       |                                                                                                                                                                                                                                                                                                                                                                                                                                                                                                                                                                                                                                                                                                                                                                                                                                                                                                                                                                                                                                                                                                                                                                                                                                                                                                                                                                                                                                                                                                                                                                                                                                                                                                                                                                                                                                                                                                                                                                                                                                                                                                                                                                                                                                                                                                                                                                                                                                                                                                                                                                                                                                                                                                                                                                                                                                                                                                                                         |          |          |          |          |         |         |          |          |         |          |                                                                                                                                                                                                                         |                                                                                                                                                                                                                                                                                                                                                                                                                                                                                                                                                                                                                                                                                                                                                                                                                                                                                                                                                                                                                                                                                                                                                                                                                                                                                                                                                                                                                                                                                                                                                                                                                                                                                                                                                                                                                                                                                                                                                                                                                                                                                                                                                                                                                                                                                                                                                                                                                                                                                                                                                                                                                                                                                                                                                                                                                                                                                                                                                                                                                                                                                                                                                             |   |          |          |          |   |          |          |          |   |          |          |          |   |          |          |          |   |          |          |          |   |          |          |          |   |          |          |          |   |          |         |         |   |          |         |         |   |         |         |         |   |          |         |         |   |          |         |         |   |         |          |          |   |          |          |          |   |         |         |         |   |         |          |          |   |          |          |          |   |          |         |          |   |          |          |          |   |          |          |         |   |          |          |         |   |          |          |          |   |         |          |         |   |         |          |         |   |         |          |          |   |          |          |         |   |          |          |          |   |          |          |          |   |          |          |          |   |          |          |          |   |          |         |          |   |          |         |          |   |          |         |          |   |          |         |          |   |          |         |          |   |         |          |          |   |         |          |          |   |         |         |          |   |         |         |          |   |          |          |         |   |          |          |         |   |          |          |         |   |          |          |         |
| H                                                                                                                                                                                                                      | -0.95281                                                                                                                                                                                                                                                                                                                                                                                                                                                                                                                                                                                                                                                                                                                                                                                                                                                                                                                                                                                                                                                                                                                                                                                                                                                                                                                                                                                                                                                                                                                                                                                                                                                                                                                                                                                                                                                                                                                                                                                                                                                                                                                                                                                                                                                                                                                                                                                                                                                                                                                                                                                                                                                                                                                                                                                                                                                                                                                                                                                                                                                                                                                                                       | -3.64363 | -1.16216 |          |          |   |          |          |          |   |          |          |          |   |          |          |          |   |          |         |          |   |          |          |          |   |          |          |          |   |          |         |          |   |          |         |          |   |         |         |         |   |         |         |         |   |          |         |          |   |          |         |         |   |         |         |         |   |          |         |         |   |         |         |         |   |          |          |          |   |          |          |          |   |         |         |         |   |          |          |         |   |          |         |          |   |         |          |         |   |         |          |          |   |         |          |          |   |         |          |          |   |         |          |          |   |         |          |         |   |         |          |         |   |         |          |         |   |         |         |         |   |          |          |         |   |          |          |         |   |          |          |         |   |          |          |         |   |          |          |         |   |          |          |         |   |          |          |         |   |          |          |         |   |          |          |         |   |          |          |          |                                                                                                                                                                                                                       |                                                                                                                                                                                                                                                                                                                                                                                                                                                                                                                                                                                                                                                                                                                                                                                                                                                                                                                                                                                                                                                                                                                                                                                                                                                                                                                                                                                                                                                                                                                                                                                                                                                                                                                                                                                                                                                                                                                                                                                                                                                                                                                                                                                                                                                                                                                                                                                                                                                                                                                                                                                                                                                                                                                                                                                                                                                                                                                                         |          |          |          |          |         |         |          |          |         |          |                                                                                                                                                                                                                         |                                                                                                                                                                                                                                                                                                                                                                                                                                                                                                                                                                                                                                                                                                                                                                                                                                                                                                                                                                                                                                                                                                                                                                                                                                                                                                                                                                                                                                                                                                                                                                                                                                                                                                                                                                                                                                                                                                                                                                                                                                                                                                                                                                                                                                                                                                                                                                                                                                                                                                                                                                                                                                                                                                                                                                                                                                                                                                                                                                                                                                                                                                                                                             |   |          |          |          |   |          |          |          |   |          |          |          |   |          |          |          |   |          |          |          |   |          |          |          |   |          |          |          |   |          |         |         |   |          |         |         |   |         |         |         |   |          |         |         |   |          |         |         |   |         |          |          |   |          |          |          |   |         |         |         |   |         |          |          |   |          |          |          |   |          |         |          |   |          |          |          |   |          |          |         |   |          |          |         |   |          |          |          |   |         |          |         |   |         |          |         |   |         |          |          |   |          |          |         |   |          |          |          |   |          |          |          |   |          |          |          |   |          |          |          |   |          |         |          |   |          |         |          |   |          |         |          |   |          |         |          |   |          |         |          |   |         |          |          |   |         |          |          |   |         |         |          |   |         |         |          |   |          |          |         |   |          |          |         |   |          |          |         |   |          |          |         |
| C                                                                                                                                                                                                                      | -0.09353                                                                                                                                                                                                                                                                                                                                                                                                                                                                                                                                                                                                                                                                                                                                                                                                                                                                                                                                                                                                                                                                                                                                                                                                                                                                                                                                                                                                                                                                                                                                                                                                                                                                                                                                                                                                                                                                                                                                                                                                                                                                                                                                                                                                                                                                                                                                                                                                                                                                                                                                                                                                                                                                                                                                                                                                                                                                                                                                                                                                                                                                                                                                                       | 0.73603  | 0.39896  |          |          |   |          |          |          |   |          |          |          |   |          |          |          |   |          |         |          |   |          |          |          |   |          |          |          |   |          |         |          |   |          |         |          |   |         |         |         |   |         |         |         |   |          |         |          |   |          |         |         |   |         |         |         |   |          |         |         |   |         |         |         |   |          |          |          |   |          |          |          |   |         |         |         |   |          |          |         |   |          |         |          |   |         |          |         |   |         |          |          |   |         |          |          |   |         |          |          |   |         |          |          |   |         |          |         |   |         |          |         |   |         |          |         |   |         |         |         |   |          |          |         |   |          |          |         |   |          |          |         |   |          |          |         |   |          |          |         |   |          |          |         |   |          |          |         |   |          |          |         |   |          |          |         |   |          |          |          |                                                                                                                                                                                                                       |                                                                                                                                                                                                                                                                                                                                                                                                                                                                                                                                                                                                                                                                                                                                                                                                                                                                                                                                                                                                                                                                                                                                                                                                                                                                                                                                                                                                                                                                                                                                                                                                                                                                                                                                                                                                                                                                                                                                                                                                                                                                                                                                                                                                                                                                                                                                                                                                                                                                                                                                                                                                                                                                                                                                                                                                                                                                                                                                         |          |          |          |          |         |         |          |          |         |          |                                                                                                                                                                                                                         |                                                                                                                                                                                                                                                                                                                                                                                                                                                                                                                                                                                                                                                                                                                                                                                                                                                                                                                                                                                                                                                                                                                                                                                                                                                                                                                                                                                                                                                                                                                                                                                                                                                                                                                                                                                                                                                                                                                                                                                                                                                                                                                                                                                                                                                                                                                                                                                                                                                                                                                                                                                                                                                                                                                                                                                                                                                                                                                                                                                                                                                                                                                                                             |   |          |          |          |   |          |          |          |   |          |          |          |   |          |          |          |   |          |          |          |   |          |          |          |   |          |          |          |   |          |         |         |   |          |         |         |   |         |         |         |   |          |         |         |   |          |         |         |   |         |          |          |   |          |          |          |   |         |         |         |   |         |          |          |   |          |          |          |   |          |         |          |   |          |          |          |   |          |          |         |   |          |          |         |   |          |          |          |   |         |          |         |   |         |          |         |   |         |          |          |   |          |          |         |   |          |          |          |   |          |          |          |   |          |          |          |   |          |          |          |   |          |         |          |   |          |         |          |   |          |         |          |   |          |         |          |   |          |         |          |   |         |          |          |   |         |          |          |   |         |         |          |   |         |         |          |   |          |          |         |   |          |          |         |   |          |          |         |   |          |          |         |
| C                                                                                                                                                                                                                      | -0.01308                                                                                                                                                                                                                                                                                                                                                                                                                                                                                                                                                                                                                                                                                                                                                                                                                                                                                                                                                                                                                                                                                                                                                                                                                                                                                                                                                                                                                                                                                                                                                                                                                                                                                                                                                                                                                                                                                                                                                                                                                                                                                                                                                                                                                                                                                                                                                                                                                                                                                                                                                                                                                                                                                                                                                                                                                                                                                                                                                                                                                                                                                                                                                       | 2.70967  | 2.46705  |          |          |   |          |          |          |   |          |          |          |   |          |          |          |   |          |         |          |   |          |          |          |   |          |          |          |   |          |         |          |   |          |         |          |   |         |         |         |   |         |         |         |   |          |         |          |   |          |         |         |   |         |         |         |   |          |         |         |   |         |         |         |   |          |          |          |   |          |          |          |   |         |         |         |   |          |          |         |   |          |         |          |   |         |          |         |   |         |          |          |   |         |          |          |   |         |          |          |   |         |          |          |   |         |          |         |   |         |          |         |   |         |          |         |   |         |         |         |   |          |          |         |   |          |          |         |   |          |          |         |   |          |          |         |   |          |          |         |   |          |          |         |   |          |          |         |   |          |          |         |   |          |          |         |   |          |          |          |                                                                                                                                                                                                                       |                                                                                                                                                                                                                                                                                                                                                                                                                                                                                                                                                                                                                                                                                                                                                                                                                                                                                                                                                                                                                                                                                                                                                                                                                                                                                                                                                                                                                                                                                                                                                                                                                                                                                                                                                                                                                                                                                                                                                                                                                                                                                                                                                                                                                                                                                                                                                                                                                                                                                                                                                                                                                                                                                                                                                                                                                                                                                                                                         |          |          |          |          |         |         |          |          |         |          |                                                                                                                                                                                                                         |                                                                                                                                                                                                                                                                                                                                                                                                                                                                                                                                                                                                                                                                                                                                                                                                                                                                                                                                                                                                                                                                                                                                                                                                                                                                                                                                                                                                                                                                                                                                                                                                                                                                                                                                                                                                                                                                                                                                                                                                                                                                                                                                                                                                                                                                                                                                                                                                                                                                                                                                                                                                                                                                                                                                                                                                                                                                                                                                                                                                                                                                                                                                                             |   |          |          |          |   |          |          |          |   |          |          |          |   |          |          |          |   |          |          |          |   |          |          |          |   |          |          |          |   |          |         |         |   |          |         |         |   |         |         |         |   |          |         |         |   |          |         |         |   |         |          |          |   |          |          |          |   |         |         |         |   |         |          |          |   |          |          |          |   |          |         |          |   |          |          |          |   |          |          |         |   |          |          |         |   |          |          |          |   |         |          |         |   |         |          |         |   |         |          |          |   |          |          |         |   |          |          |          |   |          |          |          |   |          |          |          |   |          |          |          |   |          |         |          |   |          |         |          |   |          |         |          |   |          |         |          |   |          |         |          |   |         |          |          |   |         |          |          |   |         |         |          |   |         |         |          |   |          |          |         |   |          |          |         |   |          |          |         |   |          |          |         |
| C                                                                                                                                                                                                                      | 0.05639                                                                                                                                                                                                                                                                                                                                                                                                                                                                                                                                                                                                                                                                                                                                                                                                                                                                                                                                                                                                                                                                                                                                                                                                                                                                                                                                                                                                                                                                                                                                                                                                                                                                                                                                                                                                                                                                                                                                                                                                                                                                                                                                                                                                                                                                                                                                                                                                                                                                                                                                                                                                                                                                                                                                                                                                                                                                                                                                                                                                                                                                                                                                                        | 2.12804  | 0.07990  |          |          |   |          |          |          |   |          |          |          |   |          |          |          |   |          |         |          |   |          |          |          |   |          |          |          |   |          |         |          |   |          |         |          |   |         |         |         |   |         |         |         |   |          |         |          |   |          |         |         |   |         |         |         |   |          |         |         |   |         |         |         |   |          |          |          |   |          |          |          |   |         |         |         |   |          |          |         |   |          |         |          |   |         |          |         |   |         |          |          |   |         |          |          |   |         |          |          |   |         |          |          |   |         |          |         |   |         |          |         |   |         |          |         |   |         |         |         |   |          |          |         |   |          |          |         |   |          |          |         |   |          |          |         |   |          |          |         |   |          |          |         |   |          |          |         |   |          |          |         |   |          |          |         |   |          |          |          |                                                                                                                                                                                                                       |                                                                                                                                                                                                                                                                                                                                                                                                                                                                                                                                                                                                                                                                                                                                                                                                                                                                                                                                                                                                                                                                                                                                                                                                                                                                                                                                                                                                                                                                                                                                                                                                                                                                                                                                                                                                                                                                                                                                                                                                                                                                                                                                                                                                                                                                                                                                                                                                                                                                                                                                                                                                                                                                                                                                                                                                                                                                                                                                         |          |          |          |          |         |         |          |          |         |          |                                                                                                                                                                                                                         |                                                                                                                                                                                                                                                                                                                                                                                                                                                                                                                                                                                                                                                                                                                                                                                                                                                                                                                                                                                                                                                                                                                                                                                                                                                                                                                                                                                                                                                                                                                                                                                                                                                                                                                                                                                                                                                                                                                                                                                                                                                                                                                                                                                                                                                                                                                                                                                                                                                                                                                                                                                                                                                                                                                                                                                                                                                                                                                                                                                                                                                                                                                                                             |   |          |          |          |   |          |          |          |   |          |          |          |   |          |          |          |   |          |          |          |   |          |          |          |   |          |          |          |   |          |         |         |   |          |         |         |   |         |         |         |   |          |         |         |   |          |         |         |   |         |          |          |   |          |          |          |   |         |         |         |   |         |          |          |   |          |          |          |   |          |         |          |   |          |          |          |   |          |          |         |   |          |          |         |   |          |          |          |   |         |          |         |   |         |          |         |   |         |          |          |   |          |          |         |   |          |          |          |   |          |          |          |   |          |          |          |   |          |          |          |   |          |         |          |   |          |         |          |   |          |         |          |   |          |         |          |   |          |         |          |   |         |          |          |   |         |          |          |   |         |         |          |   |         |         |          |   |          |          |         |   |          |          |         |   |          |          |         |   |          |          |         |
| C                                                                                                                                                                                                                      | -0.41797                                                                                                                                                                                                                                                                                                                                                                                                                                                                                                                                                                                                                                                                                                                                                                                                                                                                                                                                                                                                                                                                                                                                                                                                                                                                                                                                                                                                                                                                                                                                                                                                                                                                                                                                                                                                                                                                                                                                                                                                                                                                                                                                                                                                                                                                                                                                                                                                                                                                                                                                                                                                                                                                                                                                                                                                                                                                                                                                                                                                                                                                                                                                                       | 0.47464  | 1.74183  |          |          |   |          |          |          |   |          |          |          |   |          |          |          |   |          |         |          |   |          |          |          |   |          |          |          |   |          |         |          |   |          |         |          |   |         |         |         |   |         |         |         |   |          |         |          |   |          |         |         |   |         |         |         |   |          |         |         |   |         |         |         |   |          |          |          |   |          |          |          |   |         |         |         |   |          |          |         |   |          |         |          |   |         |          |         |   |         |          |          |   |         |          |          |   |         |          |          |   |         |          |          |   |         |          |         |   |         |          |         |   |         |          |         |   |         |         |         |   |          |          |         |   |          |          |         |   |          |          |         |   |          |          |         |   |          |          |         |   |          |          |         |   |          |          |         |   |          |          |         |   |          |          |         |   |          |          |          |                                                                                                                                                                                                                       |                                                                                                                                                                                                                                                                                                                                                                                                                                                                                                                                                                                                                                                                                                                                                                                                                                                                                                                                                                                                                                                                                                                                                                                                                                                                                                                                                                                                                                                                                                                                                                                                                                                                                                                                                                                                                                                                                                                                                                                                                                                                                                                                                                                                                                                                                                                                                                                                                                                                                                                                                                                                                                                                                                                                                                                                                                                                                                                                         |          |          |          |          |         |         |          |          |         |          |                                                                                                                                                                                                                         |                                                                                                                                                                                                                                                                                                                                                                                                                                                                                                                                                                                                                                                                                                                                                                                                                                                                                                                                                                                                                                                                                                                                                                                                                                                                                                                                                                                                                                                                                                                                                                                                                                                                                                                                                                                                                                                                                                                                                                                                                                                                                                                                                                                                                                                                                                                                                                                                                                                                                                                                                                                                                                                                                                                                                                                                                                                                                                                                                                                                                                                                                                                                                             |   |          |          |          |   |          |          |          |   |          |          |          |   |          |          |          |   |          |          |          |   |          |          |          |   |          |          |          |   |          |         |         |   |          |         |         |   |         |         |         |   |          |         |         |   |          |         |         |   |         |          |          |   |          |          |          |   |         |         |         |   |         |          |          |   |          |          |          |   |          |         |          |   |          |          |          |   |          |          |         |   |          |          |         |   |          |          |          |   |         |          |         |   |         |          |         |   |         |          |          |   |          |          |         |   |          |          |          |   |          |          |          |   |          |          |          |   |          |          |          |   |          |         |          |   |          |         |          |   |          |         |          |   |          |         |          |   |          |         |          |   |         |          |          |   |         |          |          |   |         |         |          |   |         |         |          |   |          |          |         |   |          |          |         |   |          |          |         |   |          |          |         |
| C                                                                                                                                                                                                                      | -0.38219                                                                                                                                                                                                                                                                                                                                                                                                                                                                                                                                                                                                                                                                                                                                                                                                                                                                                                                                                                                                                                                                                                                                                                                                                                                                                                                                                                                                                                                                                                                                                                                                                                                                                                                                                                                                                                                                                                                                                                                                                                                                                                                                                                                                                                                                                                                                                                                                                                                                                                                                                                                                                                                                                                                                                                                                                                                                                                                                                                                                                                                                                                                                                       | 1.40772  | 2.76174  |          |          |   |          |          |          |   |          |          |          |   |          |          |          |   |          |         |          |   |          |          |          |   |          |          |          |   |          |         |          |   |          |         |          |   |         |         |         |   |         |         |         |   |          |         |          |   |          |         |         |   |         |         |         |   |          |         |         |   |         |         |         |   |          |          |          |   |          |          |          |   |         |         |         |   |          |          |         |   |          |         |          |   |         |          |         |   |         |          |          |   |         |          |          |   |         |          |          |   |         |          |          |   |         |          |         |   |         |          |         |   |         |          |         |   |         |         |         |   |          |          |         |   |          |          |         |   |          |          |         |   |          |          |         |   |          |          |         |   |          |          |         |   |          |          |         |   |          |          |         |   |          |          |         |   |          |          |          |                                                                                                                                                                                                                       |                                                                                                                                                                                                                                                                                                                                                                                                                                                                                                                                                                                                                                                                                                                                                                                                                                                                                                                                                                                                                                                                                                                                                                                                                                                                                                                                                                                                                                                                                                                                                                                                                                                                                                                                                                                                                                                                                                                                                                                                                                                                                                                                                                                                                                                                                                                                                                                                                                                                                                                                                                                                                                                                                                                                                                                                                                                                                                                                         |          |          |          |          |         |         |          |          |         |          |                                                                                                                                                                                                                         |                                                                                                                                                                                                                                                                                                                                                                                                                                                                                                                                                                                                                                                                                                                                                                                                                                                                                                                                                                                                                                                                                                                                                                                                                                                                                                                                                                                                                                                                                                                                                                                                                                                                                                                                                                                                                                                                                                                                                                                                                                                                                                                                                                                                                                                                                                                                                                                                                                                                                                                                                                                                                                                                                                                                                                                                                                                                                                                                                                                                                                                                                                                                                             |   |          |          |          |   |          |          |          |   |          |          |          |   |          |          |          |   |          |          |          |   |          |          |          |   |          |          |          |   |          |         |         |   |          |         |         |   |         |         |         |   |          |         |         |   |          |         |         |   |         |          |          |   |          |          |          |   |         |         |         |   |         |          |          |   |          |          |          |   |          |         |          |   |          |          |          |   |          |          |         |   |          |          |         |   |          |          |          |   |         |          |         |   |         |          |         |   |         |          |          |   |          |          |         |   |          |          |          |   |          |          |          |   |          |          |          |   |          |          |          |   |          |         |          |   |          |         |          |   |          |         |          |   |          |         |          |   |          |         |          |   |         |          |          |   |         |          |          |   |         |         |          |   |         |         |          |   |          |          |         |   |          |          |         |   |          |          |         |   |          |          |         |
| C                                                                                                                                                                                                                      | 0.16552                                                                                                                                                                                                                                                                                                                                                                                                                                                                                                                                                                                                                                                                                                                                                                                                                                                                                                                                                                                                                                                                                                                                                                                                                                                                                                                                                                                                                                                                                                                                                                                                                                                                                                                                                                                                                                                                                                                                                                                                                                                                                                                                                                                                                                                                                                                                                                                                                                                                                                                                                                                                                                                                                                                                                                                                                                                                                                                                                                                                                                                                                                                                                        | 3.04251  | 1.13554  |          |          |   |          |          |          |   |          |          |          |   |          |          |          |   |          |         |          |   |          |          |          |   |          |          |          |   |          |         |          |   |          |         |          |   |         |         |         |   |         |         |         |   |          |         |          |   |          |         |         |   |         |         |         |   |          |         |         |   |         |         |         |   |          |          |          |   |          |          |          |   |         |         |         |   |          |          |         |   |          |         |          |   |         |          |         |   |         |          |          |   |         |          |          |   |         |          |          |   |         |          |          |   |         |          |         |   |         |          |         |   |         |          |         |   |         |         |         |   |          |          |         |   |          |          |         |   |          |          |         |   |          |          |         |   |          |          |         |   |          |          |         |   |          |          |         |   |          |          |         |   |          |          |         |   |          |          |          |                                                                                                                                                                                                                       |                                                                                                                                                                                                                                                                                                                                                                                                                                                                                                                                                                                                                                                                                                                                                                                                                                                                                                                                                                                                                                                                                                                                                                                                                                                                                                                                                                                                                                                                                                                                                                                                                                                                                                                                                                                                                                                                                                                                                                                                                                                                                                                                                                                                                                                                                                                                                                                                                                                                                                                                                                                                                                                                                                                                                                                                                                                                                                                                         |          |          |          |          |         |         |          |          |         |          |                                                                                                                                                                                                                         |                                                                                                                                                                                                                                                                                                                                                                                                                                                                                                                                                                                                                                                                                                                                                                                                                                                                                                                                                                                                                                                                                                                                                                                                                                                                                                                                                                                                                                                                                                                                                                                                                                                                                                                                                                                                                                                                                                                                                                                                                                                                                                                                                                                                                                                                                                                                                                                                                                                                                                                                                                                                                                                                                                                                                                                                                                                                                                                                                                                                                                                                                                                                                             |   |          |          |          |   |          |          |          |   |          |          |          |   |          |          |          |   |          |          |          |   |          |          |          |   |          |          |          |   |          |         |         |   |          |         |         |   |         |         |         |   |          |         |         |   |          |         |         |   |         |          |          |   |          |          |          |   |         |         |         |   |         |          |          |   |          |          |          |   |          |         |          |   |          |          |          |   |          |          |         |   |          |          |         |   |          |          |          |   |         |          |         |   |         |          |         |   |         |          |          |   |          |          |         |   |          |          |          |   |          |          |          |   |          |          |          |   |          |          |          |   |          |         |          |   |          |         |          |   |          |         |          |   |          |         |          |   |          |         |          |   |         |          |          |   |         |          |          |   |         |         |          |   |         |         |          |   |          |          |         |   |          |          |         |   |          |          |         |   |          |          |         |
| H                                                                                                                                                                                                                      | -0.63124                                                                                                                                                                                                                                                                                                                                                                                                                                                                                                                                                                                                                                                                                                                                                                                                                                                                                                                                                                                                                                                                                                                                                                                                                                                                                                                                                                                                                                                                                                                                                                                                                                                                                                                                                                                                                                                                                                                                                                                                                                                                                                                                                                                                                                                                                                                                                                                                                                                                                                                                                                                                                                                                                                                                                                                                                                                                                                                                                                                                                                                                                                                                                       | 1.10712  | 3.77117  |          |          |   |          |          |          |   |          |          |          |   |          |          |          |   |          |         |          |   |          |          |          |   |          |          |          |   |          |         |          |   |          |         |          |   |         |         |         |   |         |         |         |   |          |         |          |   |          |         |         |   |         |         |         |   |          |         |         |   |         |         |         |   |          |          |          |   |          |          |          |   |         |         |         |   |          |          |         |   |          |         |          |   |         |          |         |   |         |          |          |   |         |          |          |   |         |          |          |   |         |          |          |   |         |          |         |   |         |          |         |   |         |          |         |   |         |         |         |   |          |          |         |   |          |          |         |   |          |          |         |   |          |          |         |   |          |          |         |   |          |          |         |   |          |          |         |   |          |          |         |   |          |          |         |   |          |          |          |                                                                                                                                                                                                                       |                                                                                                                                                                                                                                                                                                                                                                                                                                                                                                                                                                                                                                                                                                                                                                                                                                                                                                                                                                                                                                                                                                                                                                                                                                                                                                                                                                                                                                                                                                                                                                                                                                                                                                                                                                                                                                                                                                                                                                                                                                                                                                                                                                                                                                                                                                                                                                                                                                                                                                                                                                                                                                                                                                                                                                                                                                                                                                                                         |          |          |          |          |         |         |          |          |         |          |                                                                                                                                                                                                                         |                                                                                                                                                                                                                                                                                                                                                                                                                                                                                                                                                                                                                                                                                                                                                                                                                                                                                                                                                                                                                                                                                                                                                                                                                                                                                                                                                                                                                                                                                                                                                                                                                                                                                                                                                                                                                                                                                                                                                                                                                                                                                                                                                                                                                                                                                                                                                                                                                                                                                                                                                                                                                                                                                                                                                                                                                                                                                                                                                                                                                                                                                                                                                             |   |          |          |          |   |          |          |          |   |          |          |          |   |          |          |          |   |          |          |          |   |          |          |          |   |          |          |          |   |          |         |         |   |          |         |         |   |         |         |         |   |          |         |         |   |          |         |         |   |         |          |          |   |          |          |          |   |         |         |         |   |         |          |          |   |          |          |          |   |          |         |          |   |          |          |          |   |          |          |         |   |          |          |         |   |          |          |          |   |         |          |         |   |         |          |         |   |         |          |          |   |          |          |         |   |          |          |          |   |          |          |          |   |          |          |          |   |          |          |          |   |          |         |          |   |          |         |          |   |          |         |          |   |          |         |          |   |          |         |          |   |         |          |          |   |         |          |          |   |         |         |          |   |         |         |          |   |          |          |         |   |          |          |         |   |          |          |         |   |          |          |         |
| H                                                                                                                                                                                                                      | 0.35870                                                                                                                                                                                                                                                                                                                                                                                                                                                                                                                                                                                                                                                                                                                                                                                                                                                                                                                                                                                                                                                                                                                                                                                                                                                                                                                                                                                                                                                                                                                                                                                                                                                                                                                                                                                                                                                                                                                                                                                                                                                                                                                                                                                                                                                                                                                                                                                                                                                                                                                                                                                                                                                                                                                                                                                                                                                                                                                                                                                                                                                                                                                                                        | 0.07795  | 0.89451  |          |          |   |          |          |          |   |          |          |          |   |          |          |          |   |          |         |          |   |          |          |          |   |          |          |          |   |          |         |          |   |          |         |          |   |         |         |         |   |         |         |         |   |          |         |          |   |          |         |         |   |         |         |         |   |          |         |         |   |         |         |         |   |          |          |          |   |          |          |          |   |         |         |         |   |          |          |         |   |          |         |          |   |         |          |         |   |         |          |          |   |         |          |          |   |         |          |          |   |         |          |          |   |         |          |         |   |         |          |         |   |         |          |         |   |         |         |         |   |          |          |         |   |          |          |         |   |          |          |         |   |          |          |         |   |          |          |         |   |          |          |         |   |          |          |         |   |          |          |         |   |          |          |         |   |          |          |          |                                                                                                                                                                                                                       |                                                                                                                                                                                                                                                                                                                                                                                                                                                                                                                                                                                                                                                                                                                                                                                                                                                                                                                                                                                                                                                                                                                                                                                                                                                                                                                                                                                                                                                                                                                                                                                                                                                                                                                                                                                                                                                                                                                                                                                                                                                                                                                                                                                                                                                                                                                                                                                                                                                                                                                                                                                                                                                                                                                                                                                                                                                                                                                                         |          |          |          |          |         |         |          |          |         |          |                                                                                                                                                                                                                         |                                                                                                                                                                                                                                                                                                                                                                                                                                                                                                                                                                                                                                                                                                                                                                                                                                                                                                                                                                                                                                                                                                                                                                                                                                                                                                                                                                                                                                                                                                                                                                                                                                                                                                                                                                                                                                                                                                                                                                                                                                                                                                                                                                                                                                                                                                                                                                                                                                                                                                                                                                                                                                                                                                                                                                                                                                                                                                                                                                                                                                                                                                                                                             |   |          |          |          |   |          |          |          |   |          |          |          |   |          |          |          |   |          |          |          |   |          |          |          |   |          |          |          |   |          |         |         |   |          |         |         |   |         |         |         |   |          |         |         |   |          |         |         |   |         |          |          |   |          |          |          |   |         |         |         |   |         |          |          |   |          |          |          |   |          |         |          |   |          |          |          |   |          |          |         |   |          |          |         |   |          |          |          |   |         |          |         |   |         |          |         |   |         |          |          |   |          |          |         |   |          |          |          |   |          |          |          |   |          |          |          |   |          |          |          |   |          |         |          |   |          |         |          |   |          |         |          |   |          |         |          |   |          |         |          |   |         |          |          |   |         |          |          |   |         |         |          |   |         |         |          |   |          |          |         |   |          |          |         |   |          |          |         |   |          |          |         |
| H                                                                                                                                                                                                                      | 0.22152                                                                                                                                                                                                                                                                                                                                                                                                                                                                                                                                                                                                                                                                                                                                                                                                                                                                                                                                                                                                                                                                                                                                                                                                                                                                                                                                                                                                                                                                                                                                                                                                                                                                                                                                                                                                                                                                                                                                                                                                                                                                                                                                                                                                                                                                                                                                                                                                                                                                                                                                                                                                                                                                                                                                                                                                                                                                                                                                                                                                                                                                                                                                                        | -0.71149 | -3.98000 |          |          |   |          |          |          |   |          |          |          |   |          |          |          |   |          |         |          |   |          |          |          |   |          |          |          |   |          |         |          |   |          |         |          |   |         |         |         |   |         |         |         |   |          |         |          |   |          |         |         |   |         |         |         |   |          |         |         |   |         |         |         |   |          |          |          |   |          |          |          |   |         |         |         |   |          |          |         |   |          |         |          |   |         |          |         |   |         |          |          |   |         |          |          |   |         |          |          |   |         |          |          |   |         |          |         |   |         |          |         |   |         |          |         |   |         |         |         |   |          |          |         |   |          |          |         |   |          |          |         |   |          |          |         |   |          |          |         |   |          |          |         |   |          |          |         |   |          |          |         |   |          |          |         |   |          |          |          |                                                                                                                                                                                                                       |                                                                                                                                                                                                                                                                                                                                                                                                                                                                                                                                                                                                                                                                                                                                                                                                                                                                                                                                                                                                                                                                                                                                                                                                                                                                                                                                                                                                                                                                                                                                                                                                                                                                                                                                                                                                                                                                                                                                                                                                                                                                                                                                                                                                                                                                                                                                                                                                                                                                                                                                                                                                                                                                                                                                                                                                                                                                                                                                         |          |          |          |          |         |         |          |          |         |          |                                                                                                                                                                                                                         |                                                                                                                                                                                                                                                                                                                                                                                                                                                                                                                                                                                                                                                                                                                                                                                                                                                                                                                                                                                                                                                                                                                                                                                                                                                                                                                                                                                                                                                                                                                                                                                                                                                                                                                                                                                                                                                                                                                                                                                                                                                                                                                                                                                                                                                                                                                                                                                                                                                                                                                                                                                                                                                                                                                                                                                                                                                                                                                                                                                                                                                                                                                                                             |   |          |          |          |   |          |          |          |   |          |          |          |   |          |          |          |   |          |          |          |   |          |          |          |   |          |          |          |   |          |         |         |   |          |         |         |   |         |         |         |   |          |         |         |   |          |         |         |   |         |          |          |   |          |          |          |   |         |         |         |   |         |          |          |   |          |          |          |   |          |         |          |   |          |          |          |   |          |          |         |   |          |          |         |   |          |          |          |   |         |          |         |   |         |          |         |   |         |          |          |   |          |          |         |   |          |          |          |   |          |          |          |   |          |          |          |   |          |          |          |   |          |         |          |   |          |         |          |   |          |         |          |   |          |         |          |   |          |         |          |   |         |          |          |   |         |          |          |   |         |         |          |   |         |         |          |   |          |          |         |   |          |          |         |   |          |          |         |   |          |          |         |
| H                                                                                                                                                                                                                      | -0.87110                                                                                                                                                                                                                                                                                                                                                                                                                                                                                                                                                                                                                                                                                                                                                                                                                                                                                                                                                                                                                                                                                                                                                                                                                                                                                                                                                                                                                                                                                                                                                                                                                                                                                                                                                                                                                                                                                                                                                                                                                                                                                                                                                                                                                                                                                                                                                                                                                                                                                                                                                                                                                                                                                                                                                                                                                                                                                                                                                                                                                                                                                                                                                       | -2.92774 | -3.46893 |          |          |   |          |          |          |   |          |          |          |   |          |          |          |   |          |         |          |   |          |          |          |   |          |          |          |   |          |         |          |   |          |         |          |   |         |         |         |   |         |         |         |   |          |         |          |   |          |         |         |   |         |         |         |   |          |         |         |   |         |         |         |   |          |          |          |   |          |          |          |   |         |         |         |   |          |          |         |   |          |         |          |   |         |          |         |   |         |          |          |   |         |          |          |   |         |          |          |   |         |          |          |   |         |          |         |   |         |          |         |   |         |          |         |   |         |         |         |   |          |          |         |   |          |          |         |   |          |          |         |   |          |          |         |   |          |          |         |   |          |          |         |   |          |          |         |   |          |          |         |   |          |          |         |   |          |          |          |                                                                                                                                                                                                                       |                                                                                                                                                                                                                                                                                                                                                                                                                                                                                                                                                                                                                                                                                                                                                                                                                                                                                                                                                                                                                                                                                                                                                                                                                                                                                                                                                                                                                                                                                                                                                                                                                                                                                                                                                                                                                                                                                                                                                                                                                                                                                                                                                                                                                                                                                                                                                                                                                                                                                                                                                                                                                                                                                                                                                                                                                                                                                                                                         |          |          |          |          |         |         |          |          |         |          |                                                                                                                                                                                                                         |                                                                                                                                                                                                                                                                                                                                                                                                                                                                                                                                                                                                                                                                                                                                                                                                                                                                                                                                                                                                                                                                                                                                                                                                                                                                                                                                                                                                                                                                                                                                                                                                                                                                                                                                                                                                                                                                                                                                                                                                                                                                                                                                                                                                                                                                                                                                                                                                                                                                                                                                                                                                                                                                                                                                                                                                                                                                                                                                                                                                                                                                                                                                                             |   |          |          |          |   |          |          |          |   |          |          |          |   |          |          |          |   |          |          |          |   |          |          |          |   |          |          |          |   |          |         |         |   |          |         |         |   |         |         |         |   |          |         |         |   |          |         |         |   |         |          |          |   |          |          |          |   |         |         |         |   |         |          |          |   |          |          |          |   |          |         |          |   |          |          |          |   |          |          |         |   |          |          |         |   |          |          |          |   |         |          |         |   |         |          |         |   |         |          |          |   |          |          |         |   |          |          |          |   |          |          |          |   |          |          |          |   |          |          |          |   |          |         |          |   |          |         |          |   |          |         |          |   |          |         |          |   |          |         |          |   |         |          |          |   |         |          |          |   |         |         |          |   |         |         |          |   |          |          |         |   |          |          |         |   |          |          |         |   |          |          |         |
| H                                                                                                                                                                                                                      | 0.07868                                                                                                                                                                                                                                                                                                                                                                                                                                                                                                                                                                                                                                                                                                                                                                                                                                                                                                                                                                                                                                                                                                                                                                                                                                                                                                                                                                                                                                                                                                                                                                                                                                                                                                                                                                                                                                                                                                                                                                                                                                                                                                                                                                                                                                                                                                                                                                                                                                                                                                                                                                                                                                                                                                                                                                                                                                                                                                                                                                                                                                                                                                                                                        | 3.46217  | 3.23927  |          |          |   |          |          |          |   |          |          |          |   |          |          |          |   |          |         |          |   |          |          |          |   |          |          |          |   |          |         |          |   |          |         |          |   |         |         |         |   |         |         |         |   |          |         |          |   |          |         |         |   |         |         |         |   |          |         |         |   |         |         |         |   |          |          |          |   |          |          |          |   |         |         |         |   |          |          |         |   |          |         |          |   |         |          |         |   |         |          |          |   |         |          |          |   |         |          |          |   |         |          |          |   |         |          |         |   |         |          |         |   |         |          |         |   |         |         |         |   |          |          |         |   |          |          |         |   |          |          |         |   |          |          |         |   |          |          |         |   |          |          |         |   |          |          |         |   |          |          |         |   |          |          |         |   |          |          |          |                                                                                                                                                                                                                       |                                                                                                                                                                                                                                                                                                                                                                                                                                                                                                                                                                                                                                                                                                                                                                                                                                                                                                                                                                                                                                                                                                                                                                                                                                                                                                                                                                                                                                                                                                                                                                                                                                                                                                                                                                                                                                                                                                                                                                                                                                                                                                                                                                                                                                                                                                                                                                                                                                                                                                                                                                                                                                                                                                                                                                                                                                                                                                                                         |          |          |          |          |         |         |          |          |         |          |                                                                                                                                                                                                                         |                                                                                                                                                                                                                                                                                                                                                                                                                                                                                                                                                                                                                                                                                                                                                                                                                                                                                                                                                                                                                                                                                                                                                                                                                                                                                                                                                                                                                                                                                                                                                                                                                                                                                                                                                                                                                                                                                                                                                                                                                                                                                                                                                                                                                                                                                                                                                                                                                                                                                                                                                                                                                                                                                                                                                                                                                                                                                                                                                                                                                                                                                                                                                             |   |          |          |          |   |          |          |          |   |          |          |          |   |          |          |          |   |          |          |          |   |          |          |          |   |          |          |          |   |          |         |         |   |          |         |         |   |         |         |         |   |          |         |         |   |          |         |         |   |         |          |          |   |          |          |          |   |         |         |         |   |         |          |          |   |          |          |          |   |          |         |          |   |          |          |          |   |          |          |         |   |          |          |         |   |          |          |          |   |         |          |         |   |         |          |         |   |         |          |          |   |          |          |         |   |          |          |          |   |          |          |          |   |          |          |          |   |          |          |          |   |          |         |          |   |          |         |          |   |          |         |          |   |          |         |          |   |          |         |          |   |         |          |          |   |         |          |          |   |         |         |          |   |         |         |          |   |          |          |         |   |          |          |         |   |          |          |         |   |          |          |         |
| H                                                                                                                                                                                                                      | 0.69779                                                                                                                                                                                                                                                                                                                                                                                                                                                                                                                                                                                                                                                                                                                                                                                                                                                                                                                                                                                                                                                                                                                                                                                                                                                                                                                                                                                                                                                                                                                                                                                                                                                                                                                                                                                                                                                                                                                                                                                                                                                                                                                                                                                                                                                                                                                                                                                                                                                                                                                                                                                                                                                                                                                                                                                                                                                                                                                                                                                                                                                                                                                                                        | 0.78597  | -2.16854 |          |          |   |          |          |          |   |          |          |          |   |          |          |          |   |          |         |          |   |          |          |          |   |          |          |          |   |          |         |          |   |          |         |          |   |         |         |         |   |         |         |         |   |          |         |          |   |          |         |         |   |         |         |         |   |          |         |         |   |         |         |         |   |          |          |          |   |          |          |          |   |         |         |         |   |          |          |         |   |          |         |          |   |         |          |         |   |         |          |          |   |         |          |          |   |         |          |          |   |         |          |          |   |         |          |         |   |         |          |         |   |         |          |         |   |         |         |         |   |          |          |         |   |          |          |         |   |          |          |         |   |          |          |         |   |          |          |         |   |          |          |         |   |          |          |         |   |          |          |         |   |          |          |         |   |          |          |          |                                                                                                                                                                                                                       |                                                                                                                                                                                                                                                                                                                                                                                                                                                                                                                                                                                                                                                                                                                                                                                                                                                                                                                                                                                                                                                                                                                                                                                                                                                                                                                                                                                                                                                                                                                                                                                                                                                                                                                                                                                                                                                                                                                                                                                                                                                                                                                                                                                                                                                                                                                                                                                                                                                                                                                                                                                                                                                                                                                                                                                                                                                                                                                                         |          |          |          |          |         |         |          |          |         |          |                                                                                                                                                                                                                         |                                                                                                                                                                                                                                                                                                                                                                                                                                                                                                                                                                                                                                                                                                                                                                                                                                                                                                                                                                                                                                                                                                                                                                                                                                                                                                                                                                                                                                                                                                                                                                                                                                                                                                                                                                                                                                                                                                                                                                                                                                                                                                                                                                                                                                                                                                                                                                                                                                                                                                                                                                                                                                                                                                                                                                                                                                                                                                                                                                                                                                                                                                                                                             |   |          |          |          |   |          |          |          |   |          |          |          |   |          |          |          |   |          |          |          |   |          |          |          |   |          |          |          |   |          |         |         |   |          |         |         |   |         |         |         |   |          |         |         |   |          |         |         |   |         |          |          |   |          |          |          |   |         |         |         |   |         |          |          |   |          |          |          |   |          |         |          |   |          |          |          |   |          |          |         |   |          |          |         |   |          |          |          |   |         |          |         |   |         |          |         |   |         |          |          |   |          |          |         |   |          |          |          |   |          |          |          |   |          |          |          |   |          |          |          |   |          |         |          |   |          |         |          |   |          |         |          |   |          |         |          |   |          |         |          |   |         |          |          |   |         |          |          |   |         |         |          |   |         |         |          |   |          |          |         |   |          |          |         |   |          |          |         |   |          |          |         |
| H                                                                                                                                                                                                                      | -0.71428                                                                                                                                                                                                                                                                                                                                                                                                                                                                                                                                                                                                                                                                                                                                                                                                                                                                                                                                                                                                                                                                                                                                                                                                                                                                                                                                                                                                                                                                                                                                                                                                                                                                                                                                                                                                                                                                                                                                                                                                                                                                                                                                                                                                                                                                                                                                                                                                                                                                                                                                                                                                                                                                                                                                                                                                                                                                                                                                                                                                                                                                                                                                                       | -0.51304 | 2.00641  |          |          |   |          |          |          |   |          |          |          |   |          |          |          |   |          |         |          |   |          |          |          |   |          |          |          |   |          |         |          |   |          |         |          |   |         |         |         |   |         |         |         |   |          |         |          |   |          |         |         |   |         |         |         |   |          |         |         |   |         |         |         |   |          |          |          |   |          |          |          |   |         |         |         |   |          |          |         |   |          |         |          |   |         |          |         |   |         |          |          |   |         |          |          |   |         |          |          |   |         |          |          |   |         |          |         |   |         |          |         |   |         |          |         |   |         |         |         |   |          |          |         |   |          |          |         |   |          |          |         |   |          |          |         |   |          |          |         |   |          |          |         |   |          |          |         |   |          |          |         |   |          |          |         |   |          |          |          |                                                                                                                                                                                                                       |                                                                                                                                                                                                                                                                                                                                                                                                                                                                                                                                                                                                                                                                                                                                                                                                                                                                                                                                                                                                                                                                                                                                                                                                                                                                                                                                                                                                                                                                                                                                                                                                                                                                                                                                                                                                                                                                                                                                                                                                                                                                                                                                                                                                                                                                                                                                                                                                                                                                                                                                                                                                                                                                                                                                                                                                                                                                                                                                         |          |          |          |          |         |         |          |          |         |          |                                                                                                                                                                                                                         |                                                                                                                                                                                                                                                                                                                                                                                                                                                                                                                                                                                                                                                                                                                                                                                                                                                                                                                                                                                                                                                                                                                                                                                                                                                                                                                                                                                                                                                                                                                                                                                                                                                                                                                                                                                                                                                                                                                                                                                                                                                                                                                                                                                                                                                                                                                                                                                                                                                                                                                                                                                                                                                                                                                                                                                                                                                                                                                                                                                                                                                                                                                                                             |   |          |          |          |   |          |          |          |   |          |          |          |   |          |          |          |   |          |          |          |   |          |          |          |   |          |          |          |   |          |         |         |   |          |         |         |   |         |         |         |   |          |         |         |   |          |         |         |   |         |          |          |   |          |          |          |   |         |         |         |   |         |          |          |   |          |          |          |   |          |         |          |   |          |          |          |   |          |          |         |   |          |          |         |   |          |          |          |   |         |          |         |   |         |          |         |   |         |          |          |   |          |          |         |   |          |          |          |   |          |          |          |   |          |          |          |   |          |          |          |   |          |         |          |   |          |         |          |   |          |         |          |   |          |         |          |   |          |         |          |   |         |          |          |   |         |          |          |   |         |         |          |   |         |         |          |   |          |          |         |   |          |          |         |   |          |          |         |   |          |          |         |
| C                                                                                                                                                                                                                      | 0.01200                                                                                                                                                                                                                                                                                                                                                                                                                                                                                                                                                                                                                                                                                                                                                                                                                                                                                                                                                                                                                                                                                                                                                                                                                                                                                                                                                                                                                                                                                                                                                                                                                                                                                                                                                                                                                                                                                                                                                                                                                                                                                                                                                                                                                                                                                                                                                                                                                                                                                                                                                                                                                                                                                                                                                                                                                                                                                                                                                                                                                                                                                                                                                        | -2.61937 | 1.04443  |          |          |   |          |          |          |   |          |          |          |   |          |          |          |   |          |         |          |   |          |          |          |   |          |          |          |   |          |         |          |   |          |         |          |   |         |         |         |   |         |         |         |   |          |         |          |   |          |         |         |   |         |         |         |   |          |         |         |   |         |         |         |   |          |          |          |   |          |          |          |   |         |         |         |   |          |          |         |   |          |         |          |   |         |          |         |   |         |          |          |   |         |          |          |   |         |          |          |   |         |          |          |   |         |          |         |   |         |          |         |   |         |          |         |   |         |         |         |   |          |          |         |   |          |          |         |   |          |          |         |   |          |          |         |   |          |          |         |   |          |          |         |   |          |          |         |   |          |          |         |   |          |          |         |   |          |          |          |                                                                                                                                                                                                                       |                                                                                                                                                                                                                                                                                                                                                                                                                                                                                                                                                                                                                                                                                                                                                                                                                                                                                                                                                                                                                                                                                                                                                                                                                                                                                                                                                                                                                                                                                                                                                                                                                                                                                                                                                                                                                                                                                                                                                                                                                                                                                                                                                                                                                                                                                                                                                                                                                                                                                                                                                                                                                                                                                                                                                                                                                                                                                                                                         |          |          |          |          |         |         |          |          |         |          |                                                                                                                                                                                                                         |                                                                                                                                                                                                                                                                                                                                                                                                                                                                                                                                                                                                                                                                                                                                                                                                                                                                                                                                                                                                                                                                                                                                                                                                                                                                                                                                                                                                                                                                                                                                                                                                                                                                                                                                                                                                                                                                                                                                                                                                                                                                                                                                                                                                                                                                                                                                                                                                                                                                                                                                                                                                                                                                                                                                                                                                                                                                                                                                                                                                                                                                                                                                                             |   |          |          |          |   |          |          |          |   |          |          |          |   |          |          |          |   |          |          |          |   |          |          |          |   |          |          |          |   |          |         |         |   |          |         |         |   |         |         |         |   |          |         |         |   |          |         |         |   |         |          |          |   |          |          |          |   |         |         |         |   |         |          |          |   |          |          |          |   |          |         |          |   |          |          |          |   |          |          |         |   |          |          |         |   |          |          |          |   |         |          |         |   |         |          |         |   |         |          |          |   |          |          |         |   |          |          |          |   |          |          |          |   |          |          |          |   |          |          |          |   |          |         |          |   |          |         |          |   |          |         |          |   |          |         |          |   |          |         |          |   |         |          |          |   |         |          |          |   |         |         |          |   |         |         |          |   |          |          |         |   |          |          |         |   |          |          |         |   |          |          |         |
| C                                                                                                                                                                                                                      | 0.01155                                                                                                                                                                                                                                                                                                                                                                                                                                                                                                                                                                                                                                                                                                                                                                                                                                                                                                                                                                                                                                                                                                                                                                                                                                                                                                                                                                                                                                                                                                                                                                                                                                                                                                                                                                                                                                                                                                                                                                                                                                                                                                                                                                                                                                                                                                                                                                                                                                                                                                                                                                                                                                                                                                                                                                                                                                                                                                                                                                                                                                                                                                                                                        | 2.78597  | -1.30298 |          |          |   |          |          |          |   |          |          |          |   |          |          |          |   |          |         |          |   |          |          |          |   |          |          |          |   |          |         |          |   |          |         |          |   |         |         |         |   |         |         |         |   |          |         |          |   |          |         |         |   |         |         |         |   |          |         |         |   |         |         |         |   |          |          |          |   |          |          |          |   |         |         |         |   |          |          |         |   |          |         |          |   |         |          |         |   |         |          |          |   |         |          |          |   |         |          |          |   |         |          |          |   |         |          |         |   |         |          |         |   |         |          |         |   |         |         |         |   |          |          |         |   |          |          |         |   |          |          |         |   |          |          |         |   |          |          |         |   |          |          |         |   |          |          |         |   |          |          |         |   |          |          |         |   |          |          |          |                                                                                                                                                                                                                       |                                                                                                                                                                                                                                                                                                                                                                                                                                                                                                                                                                                                                                                                                                                                                                                                                                                                                                                                                                                                                                                                                                                                                                                                                                                                                                                                                                                                                                                                                                                                                                                                                                                                                                                                                                                                                                                                                                                                                                                                                                                                                                                                                                                                                                                                                                                                                                                                                                                                                                                                                                                                                                                                                                                                                                                                                                                                                                                                         |          |          |          |          |         |         |          |          |         |          |                                                                                                                                                                                                                         |                                                                                                                                                                                                                                                                                                                                                                                                                                                                                                                                                                                                                                                                                                                                                                                                                                                                                                                                                                                                                                                                                                                                                                                                                                                                                                                                                                                                                                                                                                                                                                                                                                                                                                                                                                                                                                                                                                                                                                                                                                                                                                                                                                                                                                                                                                                                                                                                                                                                                                                                                                                                                                                                                                                                                                                                                                                                                                                                                                                                                                                                                                                                                             |   |          |          |          |   |          |          |          |   |          |          |          |   |          |          |          |   |          |          |          |   |          |          |          |   |          |          |          |   |          |         |         |   |          |         |         |   |         |         |         |   |          |         |         |   |          |         |         |   |         |          |          |   |          |          |          |   |         |         |         |   |         |          |          |   |          |          |          |   |          |         |          |   |          |          |          |   |          |          |         |   |          |          |         |   |          |          |          |   |         |          |         |   |         |          |         |   |         |          |          |   |          |          |         |   |          |          |          |   |          |          |          |   |          |          |          |   |          |          |          |   |          |         |          |   |          |         |          |   |          |         |          |   |          |         |          |   |          |         |          |   |         |          |          |   |         |          |          |   |         |         |          |   |         |         |          |   |          |          |         |   |          |          |         |   |          |          |         |   |          |          |         |
| C                                                                                                                                                                                                                      | 0.43425                                                                                                                                                                                                                                                                                                                                                                                                                                                                                                                                                                                                                                                                                                                                                                                                                                                                                                                                                                                                                                                                                                                                                                                                                                                                                                                                                                                                                                                                                                                                                                                                                                                                                                                                                                                                                                                                                                                                                                                                                                                                                                                                                                                                                                                                                                                                                                                                                                                                                                                                                                                                                                                                                                                                                                                                                                                                                                                                                                                                                                                                                                                                                        | -4.08142 | 0.71942  |          |          |   |          |          |          |   |          |          |          |   |          |          |          |   |          |         |          |   |          |          |          |   |          |          |          |   |          |         |          |   |          |         |          |   |         |         |         |   |         |         |         |   |          |         |          |   |          |         |         |   |         |         |         |   |          |         |         |   |         |         |         |   |          |          |          |   |          |          |          |   |         |         |         |   |          |          |         |   |          |         |          |   |         |          |         |   |         |          |          |   |         |          |          |   |         |          |          |   |         |          |          |   |         |          |         |   |         |          |         |   |         |          |         |   |         |         |         |   |          |          |         |   |          |          |         |   |          |          |         |   |          |          |         |   |          |          |         |   |          |          |         |   |          |          |         |   |          |          |         |   |          |          |         |   |          |          |          |                                                                                                                                                                                                                       |                                                                                                                                                                                                                                                                                                                                                                                                                                                                                                                                                                                                                                                                                                                                                                                                                                                                                                                                                                                                                                                                                                                                                                                                                                                                                                                                                                                                                                                                                                                                                                                                                                                                                                                                                                                                                                                                                                                                                                                                                                                                                                                                                                                                                                                                                                                                                                                                                                                                                                                                                                                                                                                                                                                                                                                                                                                                                                                                         |          |          |          |          |         |         |          |          |         |          |                                                                                                                                                                                                                         |                                                                                                                                                                                                                                                                                                                                                                                                                                                                                                                                                                                                                                                                                                                                                                                                                                                                                                                                                                                                                                                                                                                                                                                                                                                                                                                                                                                                                                                                                                                                                                                                                                                                                                                                                                                                                                                                                                                                                                                                                                                                                                                                                                                                                                                                                                                                                                                                                                                                                                                                                                                                                                                                                                                                                                                                                                                                                                                                                                                                                                                                                                                                                             |   |          |          |          |   |          |          |          |   |          |          |          |   |          |          |          |   |          |          |          |   |          |          |          |   |          |          |          |   |          |         |         |   |          |         |         |   |         |         |         |   |          |         |         |   |          |         |         |   |         |          |          |   |          |          |          |   |         |         |         |   |         |          |          |   |          |          |          |   |          |         |          |   |          |          |          |   |          |          |         |   |          |          |         |   |          |          |          |   |         |          |         |   |         |          |         |   |         |          |          |   |          |          |         |   |          |          |          |   |          |          |          |   |          |          |          |   |          |          |          |   |          |         |          |   |          |         |          |   |          |         |          |   |          |         |          |   |          |         |          |   |         |          |          |   |         |          |          |   |         |         |          |   |         |         |          |   |          |          |         |   |          |          |         |   |          |          |         |   |          |          |         |
| H                                                                                                                                                                                                                      | 0.82496                                                                                                                                                                                                                                                                                                                                                                                                                                                                                                                                                                                                                                                                                                                                                                                                                                                                                                                                                                                                                                                                                                                                                                                                                                                                                                                                                                                                                                                                                                                                                                                                                                                                                                                                                                                                                                                                                                                                                                                                                                                                                                                                                                                                                                                                                                                                                                                                                                                                                                                                                                                                                                                                                                                                                                                                                                                                                                                                                                                                                                                                                                                                                        | -4.53173 | 1.63392  |          |          |   |          |          |          |   |          |          |          |   |          |          |          |   |          |         |          |   |          |          |          |   |          |          |          |   |          |         |          |   |          |         |          |   |         |         |         |   |         |         |         |   |          |         |          |   |          |         |         |   |         |         |         |   |          |         |         |   |         |         |         |   |          |          |          |   |          |          |          |   |         |         |         |   |          |          |         |   |          |         |          |   |         |          |         |   |         |          |          |   |         |          |          |   |         |          |          |   |         |          |          |   |         |          |         |   |         |          |         |   |         |          |         |   |         |         |         |   |          |          |         |   |          |          |         |   |          |          |         |   |          |          |         |   |          |          |         |   |          |          |         |   |          |          |         |   |          |          |         |   |          |          |         |   |          |          |          |                                                                                                                                                                                                                       |                                                                                                                                                                                                                                                                                                                                                                                                                                                                                                                                                                                                                                                                                                                                                                                                                                                                                                                                                                                                                                                                                                                                                                                                                                                                                                                                                                                                                                                                                                                                                                                                                                                                                                                                                                                                                                                                                                                                                                                                                                                                                                                                                                                                                                                                                                                                                                                                                                                                                                                                                                                                                                                                                                                                                                                                                                                                                                                                         |          |          |          |          |         |         |          |          |         |          |                                                                                                                                                                                                                         |                                                                                                                                                                                                                                                                                                                                                                                                                                                                                                                                                                                                                                                                                                                                                                                                                                                                                                                                                                                                                                                                                                                                                                                                                                                                                                                                                                                                                                                                                                                                                                                                                                                                                                                                                                                                                                                                                                                                                                                                                                                                                                                                                                                                                                                                                                                                                                                                                                                                                                                                                                                                                                                                                                                                                                                                                                                                                                                                                                                                                                                                                                                                                             |   |          |          |          |   |          |          |          |   |          |          |          |   |          |          |          |   |          |          |          |   |          |          |          |   |          |          |          |   |          |         |         |   |          |         |         |   |         |         |         |   |          |         |         |   |          |         |         |   |         |          |          |   |          |          |          |   |         |         |         |   |         |          |          |   |          |          |          |   |          |         |          |   |          |          |          |   |          |          |         |   |          |          |         |   |          |          |          |   |         |          |         |   |         |          |         |   |         |          |          |   |          |          |         |   |          |          |          |   |          |          |          |   |          |          |          |   |          |          |          |   |          |         |          |   |          |         |          |   |          |         |          |   |          |         |          |   |          |         |          |   |         |          |          |   |         |          |          |   |         |         |          |   |         |         |          |   |          |          |         |   |          |          |         |   |          |          |         |   |          |          |         |
| H                                                                                                                                                                                                                      | 1.21554                                                                                                                                                                                                                                                                                                                                                                                                                                                                                                                                                                                                                                                                                                                                                                                                                                                                                                                                                                                                                                                                                                                                                                                                                                                                                                                                                                                                                                                                                                                                                                                                                                                                                                                                                                                                                                                                                                                                                                                                                                                                                                                                                                                                                                                                                                                                                                                                                                                                                                                                                                                                                                                                                                                                                                                                                                                                                                                                                                                                                                                                                                                                                        | -4.10662 | -0.04064 |          |          |   |          |          |          |   |          |          |          |   |          |          |          |   |          |         |          |   |          |          |          |   |          |          |          |   |          |         |          |   |          |         |          |   |         |         |         |   |         |         |         |   |          |         |          |   |          |         |         |   |         |         |         |   |          |         |         |   |         |         |         |   |          |          |          |   |          |          |          |   |         |         |         |   |          |          |         |   |          |         |          |   |         |          |         |   |         |          |          |   |         |          |          |   |         |          |          |   |         |          |          |   |         |          |         |   |         |          |         |   |         |          |         |   |         |         |         |   |          |          |         |   |          |          |         |   |          |          |         |   |          |          |         |   |          |          |         |   |          |          |         |   |          |          |         |   |          |          |         |   |          |          |         |   |          |          |          |                                                                                                                                                                                                                       |                                                                                                                                                                                                                                                                                                                                                                                                                                                                                                                                                                                                                                                                                                                                                                                                                                                                                                                                                                                                                                                                                                                                                                                                                                                                                                                                                                                                                                                                                                                                                                                                                                                                                                                                                                                                                                                                                                                                                                                                                                                                                                                                                                                                                                                                                                                                                                                                                                                                                                                                                                                                                                                                                                                                                                                                                                                                                                                                         |          |          |          |          |         |         |          |          |         |          |                                                                                                                                                                                                                         |                                                                                                                                                                                                                                                                                                                                                                                                                                                                                                                                                                                                                                                                                                                                                                                                                                                                                                                                                                                                                                                                                                                                                                                                                                                                                                                                                                                                                                                                                                                                                                                                                                                                                                                                                                                                                                                                                                                                                                                                                                                                                                                                                                                                                                                                                                                                                                                                                                                                                                                                                                                                                                                                                                                                                                                                                                                                                                                                                                                                                                                                                                                                                             |   |          |          |          |   |          |          |          |   |          |          |          |   |          |          |          |   |          |          |          |   |          |          |          |   |          |          |          |   |          |         |         |   |          |         |         |   |         |         |         |   |          |         |         |   |          |         |         |   |         |          |          |   |          |          |          |   |         |         |         |   |         |          |          |   |          |          |          |   |          |         |          |   |          |          |          |   |          |          |         |   |          |          |         |   |          |          |          |   |         |          |         |   |         |          |         |   |         |          |          |   |          |          |         |   |          |          |          |   |          |          |          |   |          |          |          |   |          |          |          |   |          |         |          |   |          |         |          |   |          |         |          |   |          |         |          |   |          |         |          |   |         |          |          |   |         |          |          |   |         |         |          |   |         |         |          |   |          |          |         |   |          |          |         |   |          |          |         |   |          |          |         |
| H                                                                                                                                                                                                                      | -0.39813                                                                                                                                                                                                                                                                                                                                                                                                                                                                                                                                                                                                                                                                                                                                                                                                                                                                                                                                                                                                                                                                                                                                                                                                                                                                                                                                                                                                                                                                                                                                                                                                                                                                                                                                                                                                                                                                                                                                                                                                                                                                                                                                                                                                                                                                                                                                                                                                                                                                                                                                                                                                                                                                                                                                                                                                                                                                                                                                                                                                                                                                                                                                                       | -4.70307 | 0.39042  |          |          |   |          |          |          |   |          |          |          |   |          |          |          |   |          |         |          |   |          |          |          |   |          |          |          |   |          |         |          |   |          |         |          |   |         |         |         |   |         |         |         |   |          |         |          |   |          |         |         |   |         |         |         |   |          |         |         |   |         |         |         |   |          |          |          |   |          |          |          |   |         |         |         |   |          |          |         |   |          |         |          |   |         |          |         |   |         |          |          |   |         |          |          |   |         |          |          |   |         |          |          |   |         |          |         |   |         |          |         |   |         |          |         |   |         |         |         |   |          |          |         |   |          |          |         |   |          |          |         |   |          |          |         |   |          |          |         |   |          |          |         |   |          |          |         |   |          |          |         |   |          |          |         |   |          |          |          |                                                                                                                                                                                                                       |                                                                                                                                                                                                                                                                                                                                                                                                                                                                                                                                                                                                                                                                                                                                                                                                                                                                                                                                                                                                                                                                                                                                                                                                                                                                                                                                                                                                                                                                                                                                                                                                                                                                                                                                                                                                                                                                                                                                                                                                                                                                                                                                                                                                                                                                                                                                                                                                                                                                                                                                                                                                                                                                                                                                                                                                                                                                                                                                         |          |          |          |          |         |         |          |          |         |          |                                                                                                                                                                                                                         |                                                                                                                                                                                                                                                                                                                                                                                                                                                                                                                                                                                                                                                                                                                                                                                                                                                                                                                                                                                                                                                                                                                                                                                                                                                                                                                                                                                                                                                                                                                                                                                                                                                                                                                                                                                                                                                                                                                                                                                                                                                                                                                                                                                                                                                                                                                                                                                                                                                                                                                                                                                                                                                                                                                                                                                                                                                                                                                                                                                                                                                                                                                                                             |   |          |          |          |   |          |          |          |   |          |          |          |   |          |          |          |   |          |          |          |   |          |          |          |   |          |          |          |   |          |         |         |   |          |         |         |   |         |         |         |   |          |         |         |   |          |         |         |   |         |          |          |   |          |          |          |   |         |         |         |   |         |          |          |   |          |          |          |   |          |         |          |   |          |          |          |   |          |          |         |   |          |          |         |   |          |          |          |   |         |          |         |   |         |          |         |   |         |          |          |   |          |          |         |   |          |          |          |   |          |          |          |   |          |          |          |   |          |          |          |   |          |         |          |   |          |         |          |   |          |         |          |   |          |         |          |   |          |         |          |   |         |          |          |   |         |          |          |   |         |         |          |   |         |         |          |   |          |          |         |   |          |          |         |   |          |          |         |   |          |          |         |
| C                                                                                                                                                                                                                      | 1.26100                                                                                                                                                                                                                                                                                                                                                                                                                                                                                                                                                                                                                                                                                                                                                                                                                                                                                                                                                                                                                                                                                                                                                                                                                                                                                                                                                                                                                                                                                                                                                                                                                                                                                                                                                                                                                                                                                                                                                                                                                                                                                                                                                                                                                                                                                                                                                                                                                                                                                                                                                                                                                                                                                                                                                                                                                                                                                                                                                                                                                                                                                                                                                        | -2.07077 | 1.77648  |          |          |   |          |          |          |   |          |          |          |   |          |          |          |   |          |         |          |   |          |          |          |   |          |          |          |   |          |         |          |   |          |         |          |   |         |         |         |   |         |         |         |   |          |         |          |   |          |         |         |   |         |         |         |   |          |         |         |   |         |         |         |   |          |          |          |   |          |          |          |   |         |         |         |   |          |          |         |   |          |         |          |   |         |          |         |   |         |          |          |   |         |          |          |   |         |          |          |   |         |          |          |   |         |          |         |   |         |          |         |   |         |          |         |   |         |         |         |   |          |          |         |   |          |          |         |   |          |          |         |   |          |          |         |   |          |          |         |   |          |          |         |   |          |          |         |   |          |          |         |   |          |          |         |   |          |          |          |                                                                                                                                                                                                                       |                                                                                                                                                                                                                                                                                                                                                                                                                                                                                                                                                                                                                                                                                                                                                                                                                                                                                                                                                                                                                                                                                                                                                                                                                                                                                                                                                                                                                                                                                                                                                                                                                                                                                                                                                                                                                                                                                                                                                                                                                                                                                                                                                                                                                                                                                                                                                                                                                                                                                                                                                                                                                                                                                                                                                                                                                                                                                                                                         |          |          |          |          |         |         |          |          |         |          |                                                                                                                                                                                                                         |                                                                                                                                                                                                                                                                                                                                                                                                                                                                                                                                                                                                                                                                                                                                                                                                                                                                                                                                                                                                                                                                                                                                                                                                                                                                                                                                                                                                                                                                                                                                                                                                                                                                                                                                                                                                                                                                                                                                                                                                                                                                                                                                                                                                                                                                                                                                                                                                                                                                                                                                                                                                                                                                                                                                                                                                                                                                                                                                                                                                                                                                                                                                                             |   |          |          |          |   |          |          |          |   |          |          |          |   |          |          |          |   |          |          |          |   |          |          |          |   |          |          |          |   |          |         |         |   |          |         |         |   |         |         |         |   |          |         |         |   |          |         |         |   |         |          |          |   |          |          |          |   |         |         |         |   |         |          |          |   |          |          |          |   |          |         |          |   |          |          |          |   |          |          |         |   |          |          |         |   |          |          |          |   |         |          |         |   |         |          |         |   |         |          |          |   |          |          |         |   |          |          |          |   |          |          |          |   |          |          |          |   |          |          |          |   |          |         |          |   |          |         |          |   |          |         |          |   |          |         |          |   |          |         |          |   |         |          |          |   |         |          |          |   |         |         |          |   |         |         |          |   |          |          |         |   |          |          |         |   |          |          |         |   |          |          |         |
| H                                                                                                                                                                                                                      | 1.24017                                                                                                                                                                                                                                                                                                                                                                                                                                                                                                                                                                                                                                                                                                                                                                                                                                                                                                                                                                                                                                                                                                                                                                                                                                                                                                                                                                                                                                                                                                                                                                                                                                                                                                                                                                                                                                                                                                                                                                                                                                                                                                                                                                                                                                                                                                                                                                                                                                                                                                                                                                                                                                                                                                                                                                                                                                                                                                                                                                                                                                                                                                                                                        | -1.01396 | 2.00928  |          |          |   |          |          |          |   |          |          |          |   |          |          |          |   |          |         |          |   |          |          |          |   |          |          |          |   |          |         |          |   |          |         |          |   |         |         |         |   |         |         |         |   |          |         |          |   |          |         |         |   |         |         |         |   |          |         |         |   |         |         |         |   |          |          |          |   |          |          |          |   |         |         |         |   |          |          |         |   |          |         |          |   |         |          |         |   |         |          |          |   |         |          |          |   |         |          |          |   |         |          |          |   |         |          |         |   |         |          |         |   |         |          |         |   |         |         |         |   |          |          |         |   |          |          |         |   |          |          |         |   |          |          |         |   |          |          |         |   |          |          |         |   |          |          |         |   |          |          |         |   |          |          |         |   |          |          |          |                                                                                                                                                                                                                       |                                                                                                                                                                                                                                                                                                                                                                                                                                                                                                                                                                                                                                                                                                                                                                                                                                                                                                                                                                                                                                                                                                                                                                                                                                                                                                                                                                                                                                                                                                                                                                                                                                                                                                                                                                                                                                                                                                                                                                                                                                                                                                                                                                                                                                                                                                                                                                                                                                                                                                                                                                                                                                                                                                                                                                                                                                                                                                                                         |          |          |          |          |         |         |          |          |         |          |                                                                                                                                                                                                                         |                                                                                                                                                                                                                                                                                                                                                                                                                                                                                                                                                                                                                                                                                                                                                                                                                                                                                                                                                                                                                                                                                                                                                                                                                                                                                                                                                                                                                                                                                                                                                                                                                                                                                                                                                                                                                                                                                                                                                                                                                                                                                                                                                                                                                                                                                                                                                                                                                                                                                                                                                                                                                                                                                                                                                                                                                                                                                                                                                                                                                                                                                                                                                             |   |          |          |          |   |          |          |          |   |          |          |          |   |          |          |          |   |          |          |          |   |          |          |          |   |          |          |          |   |          |         |         |   |          |         |         |   |         |         |         |   |          |         |         |   |          |         |         |   |         |          |          |   |          |          |          |   |         |         |         |   |         |          |          |   |          |          |          |   |          |         |          |   |          |          |          |   |          |          |         |   |          |          |         |   |          |          |          |   |         |          |         |   |         |          |         |   |         |          |          |   |          |          |         |   |          |          |          |   |          |          |          |   |          |          |          |   |          |          |          |   |          |         |          |   |          |         |          |   |          |         |          |   |          |         |          |   |          |         |          |   |         |          |          |   |         |          |          |   |         |         |          |   |         |         |          |   |          |          |         |   |          |          |         |   |          |          |         |   |          |          |         |
| H                                                                                                                                                                                                                      | 2.14014                                                                                                                                                                                                                                                                                                                                                                                                                                                                                                                                                                                                                                                                                                                                                                                                                                                                                                                                                                                                                                                                                                                                                                                                                                                                                                                                                                                                                                                                                                                                                                                                                                                                                                                                                                                                                                                                                                                                                                                                                                                                                                                                                                                                                                                                                                                                                                                                                                                                                                                                                                                                                                                                                                                                                                                                                                                                                                                                                                                                                                                                                                                                                        | -2.25002 | 1.15355  |          |          |   |          |          |          |   |          |          |          |   |          |          |          |   |          |         |          |   |          |          |          |   |          |          |          |   |          |         |          |   |          |         |          |   |         |         |         |   |         |         |         |   |          |         |          |   |          |         |         |   |         |         |         |   |          |         |         |   |         |         |         |   |          |          |          |   |          |          |          |   |         |         |         |   |          |          |         |   |          |         |          |   |         |          |         |   |         |          |          |   |         |          |          |   |         |          |          |   |         |          |          |   |         |          |         |   |         |          |         |   |         |          |         |   |         |         |         |   |          |          |         |   |          |          |         |   |          |          |         |   |          |          |         |   |          |          |         |   |          |          |         |   |          |          |         |   |          |          |         |   |          |          |         |   |          |          |          |                                                                                                                                                                                                                       |                                                                                                                                                                                                                                                                                                                                                                                                                                                                                                                                                                                                                                                                                                                                                                                                                                                                                                                                                                                                                                                                                                                                                                                                                                                                                                                                                                                                                                                                                                                                                                                                                                                                                                                                                                                                                                                                                                                                                                                                                                                                                                                                                                                                                                                                                                                                                                                                                                                                                                                                                                                                                                                                                                                                                                                                                                                                                                                                         |          |          |          |          |         |         |          |          |         |          |                                                                                                                                                                                                                         |                                                                                                                                                                                                                                                                                                                                                                                                                                                                                                                                                                                                                                                                                                                                                                                                                                                                                                                                                                                                                                                                                                                                                                                                                                                                                                                                                                                                                                                                                                                                                                                                                                                                                                                                                                                                                                                                                                                                                                                                                                                                                                                                                                                                                                                                                                                                                                                                                                                                                                                                                                                                                                                                                                                                                                                                                                                                                                                                                                                                                                                                                                                                                             |   |          |          |          |   |          |          |          |   |          |          |          |   |          |          |          |   |          |          |          |   |          |          |          |   |          |          |          |   |          |         |         |   |          |         |         |   |         |         |         |   |          |         |         |   |          |         |         |   |         |          |          |   |          |          |          |   |         |         |         |   |         |          |          |   |          |          |          |   |          |         |          |   |          |          |          |   |          |          |         |   |          |          |         |   |          |          |          |   |         |          |         |   |         |          |         |   |         |          |          |   |          |          |         |   |          |          |          |   |          |          |          |   |          |          |          |   |          |          |          |   |          |         |          |   |          |         |          |   |          |         |          |   |          |         |          |   |          |         |          |   |         |          |          |   |         |          |          |   |         |         |          |   |         |         |          |   |          |          |         |   |          |          |         |   |          |          |         |   |          |          |         |
| H                                                                                                                                                                                                                      | 1.39364                                                                                                                                                                                                                                                                                                                                                                                                                                                                                                                                                                                                                                                                                                                                                                                                                                                                                                                                                                                                                                                                                                                                                                                                                                                                                                                                                                                                                                                                                                                                                                                                                                                                                                                                                                                                                                                                                                                                                                                                                                                                                                                                                                                                                                                                                                                                                                                                                                                                                                                                                                                                                                                                                                                                                                                                                                                                                                                                                                                                                                                                                                                                                        | -6.22282 | 2.71003  |          |          |   |          |          |          |   |          |          |          |   |          |          |          |   |          |         |          |   |          |          |          |   |          |          |          |   |          |         |          |   |          |         |          |   |         |         |         |   |         |         |         |   |          |         |          |   |          |         |         |   |         |         |         |   |          |         |         |   |         |         |         |   |          |          |          |   |          |          |          |   |         |         |         |   |          |          |         |   |          |         |          |   |         |          |         |   |         |          |          |   |         |          |          |   |         |          |          |   |         |          |          |   |         |          |         |   |         |          |         |   |         |          |         |   |         |         |         |   |          |          |         |   |          |          |         |   |          |          |         |   |          |          |         |   |          |          |         |   |          |          |         |   |          |          |         |   |          |          |         |   |          |          |         |   |          |          |          |                                                                                                                                                                                                                       |                                                                                                                                                                                                                                                                                                                                                                                                                                                                                                                                                                                                                                                                                                                                                                                                                                                                                                                                                                                                                                                                                                                                                                                                                                                                                                                                                                                                                                                                                                                                                                                                                                                                                                                                                                                                                                                                                                                                                                                                                                                                                                                                                                                                                                                                                                                                                                                                                                                                                                                                                                                                                                                                                                                                                                                                                                                                                                                                         |          |          |          |          |         |         |          |          |         |          |                                                                                                                                                                                                                         |                                                                                                                                                                                                                                                                                                                                                                                                                                                                                                                                                                                                                                                                                                                                                                                                                                                                                                                                                                                                                                                                                                                                                                                                                                                                                                                                                                                                                                                                                                                                                                                                                                                                                                                                                                                                                                                                                                                                                                                                                                                                                                                                                                                                                                                                                                                                                                                                                                                                                                                                                                                                                                                                                                                                                                                                                                                                                                                                                                                                                                                                                                                                                             |   |          |          |          |   |          |          |          |   |          |          |          |   |          |          |          |   |          |          |          |   |          |          |          |   |          |          |          |   |          |         |         |   |          |         |         |   |         |         |         |   |          |         |         |   |          |         |         |   |         |          |          |   |          |          |          |   |         |         |         |   |         |          |          |   |          |          |          |   |          |         |          |   |          |          |          |   |          |          |         |   |          |          |         |   |          |          |          |   |         |          |         |   |         |          |         |   |         |          |          |   |          |          |         |   |          |          |          |   |          |          |          |   |          |          |          |   |          |          |          |   |          |         |          |   |          |         |          |   |          |         |          |   |          |         |          |   |          |         |          |   |         |          |          |   |         |          |          |   |         |         |          |   |         |         |          |   |          |          |         |   |          |          |         |   |          |          |         |   |          |          |         |
| H                                                                                                                                                                                                                      | -0.47187                                                                                                                                                                                                                                                                                                                                                                                                                                                                                                                                                                                                                                                                                                                                                                                                                                                                                                                                                                                                                                                                                                                                                                                                                                                                                                                                                                                                                                                                                                                                                                                                                                                                                                                                                                                                                                                                                                                                                                                                                                                                                                                                                                                                                                                                                                                                                                                                                                                                                                                                                                                                                                                                                                                                                                                                                                                                                                                                                                                                                                                                                                                                                       | 2.10423  | -1.99381 |          |          |   |          |          |          |   |          |          |          |   |          |          |          |   |          |         |          |   |          |          |          |   |          |          |          |   |          |         |          |   |          |         |          |   |         |         |         |   |         |         |         |   |          |         |          |   |          |         |         |   |         |         |         |   |          |         |         |   |         |         |         |   |          |          |          |   |          |          |          |   |         |         |         |   |          |          |         |   |          |         |          |   |         |          |         |   |         |          |          |   |         |          |          |   |         |          |          |   |         |          |          |   |         |          |         |   |         |          |         |   |         |          |         |   |         |         |         |   |          |          |         |   |          |          |         |   |          |          |         |   |          |          |         |   |          |          |         |   |          |          |         |   |          |          |         |   |          |          |         |   |          |          |         |   |          |          |          |                                                                                                                                                                                                                       |                                                                                                                                                                                                                                                                                                                                                                                                                                                                                                                                                                                                                                                                                                                                                                                                                                                                                                                                                                                                                                                                                                                                                                                                                                                                                                                                                                                                                                                                                                                                                                                                                                                                                                                                                                                                                                                                                                                                                                                                                                                                                                                                                                                                                                                                                                                                                                                                                                                                                                                                                                                                                                                                                                                                                                                                                                                                                                                                         |          |          |          |          |         |         |          |          |         |          |                                                                                                                                                                                                                         |                                                                                                                                                                                                                                                                                                                                                                                                                                                                                                                                                                                                                                                                                                                                                                                                                                                                                                                                                                                                                                                                                                                                                                                                                                                                                                                                                                                                                                                                                                                                                                                                                                                                                                                                                                                                                                                                                                                                                                                                                                                                                                                                                                                                                                                                                                                                                                                                                                                                                                                                                                                                                                                                                                                                                                                                                                                                                                                                                                                                                                                                                                                                                             |   |          |          |          |   |          |          |          |   |          |          |          |   |          |          |          |   |          |          |          |   |          |          |          |   |          |          |          |   |          |         |         |   |          |         |         |   |         |         |         |   |          |         |         |   |          |         |         |   |         |          |          |   |          |          |          |   |         |         |         |   |         |          |          |   |          |          |          |   |          |         |          |   |          |          |          |   |          |          |         |   |          |          |         |   |          |          |          |   |         |          |         |   |         |          |         |   |         |          |          |   |          |          |         |   |          |          |          |   |          |          |          |   |          |          |          |   |          |          |          |   |          |         |          |   |          |         |          |   |          |         |          |   |          |         |          |   |          |         |          |   |         |          |          |   |         |          |          |   |         |         |          |   |         |         |          |   |          |          |         |   |          |          |         |   |          |          |         |   |          |          |         |
| C                                                                                                                                                                                                                      | -0.86872                                                                                                                                                                                                                                                                                                                                                                                                                                                                                                                                                                                                                                                                                                                                                                                                                                                                                                                                                                                                                                                                                                                                                                                                                                                                                                                                                                                                                                                                                                                                                                                                                                                                                                                                                                                                                                                                                                                                                                                                                                                                                                                                                                                                                                                                                                                                                                                                                                                                                                                                                                                                                                                                                                                                                                                                                                                                                                                                                                                                                                                                                                                                                       | 4.04876  | -1.34043 |          |          |   |          |          |          |   |          |          |          |   |          |          |          |   |          |         |          |   |          |          |          |   |          |          |          |   |          |         |          |   |          |         |          |   |         |         |         |   |         |         |         |   |          |         |          |   |          |         |         |   |         |         |         |   |          |         |         |   |         |         |         |   |          |          |          |   |          |          |          |   |         |         |         |   |          |          |         |   |          |         |          |   |         |          |         |   |         |          |          |   |         |          |          |   |         |          |          |   |         |          |          |   |         |          |         |   |         |          |         |   |         |          |         |   |         |         |         |   |          |          |         |   |          |          |         |   |          |          |         |   |          |          |         |   |          |          |         |   |          |          |         |   |          |          |         |   |          |          |         |   |          |          |         |   |          |          |          |                                                                                                                                                                                                                       |                                                                                                                                                                                                                                                                                                                                                                                                                                                                                                                                                                                                                                                                                                                                                                                                                                                                                                                                                                                                                                                                                                                                                                                                                                                                                                                                                                                                                                                                                                                                                                                                                                                                                                                                                                                                                                                                                                                                                                                                                                                                                                                                                                                                                                                                                                                                                                                                                                                                                                                                                                                                                                                                                                                                                                                                                                                                                                                                         |          |          |          |          |         |         |          |          |         |          |                                                                                                                                                                                                                         |                                                                                                                                                                                                                                                                                                                                                                                                                                                                                                                                                                                                                                                                                                                                                                                                                                                                                                                                                                                                                                                                                                                                                                                                                                                                                                                                                                                                                                                                                                                                                                                                                                                                                                                                                                                                                                                                                                                                                                                                                                                                                                                                                                                                                                                                                                                                                                                                                                                                                                                                                                                                                                                                                                                                                                                                                                                                                                                                                                                                                                                                                                                                                             |   |          |          |          |   |          |          |          |   |          |          |          |   |          |          |          |   |          |          |          |   |          |          |          |   |          |          |          |   |          |         |         |   |          |         |         |   |         |         |         |   |          |         |         |   |          |         |         |   |         |          |          |   |          |          |          |   |         |         |         |   |         |          |          |   |          |          |          |   |          |         |          |   |          |          |          |   |          |          |         |   |          |          |         |   |          |          |          |   |         |          |         |   |         |          |         |   |         |          |          |   |          |          |         |   |          |          |          |   |          |          |          |   |          |          |          |   |          |          |          |   |          |         |          |   |          |         |          |   |          |         |          |   |          |         |          |   |          |         |          |   |         |          |          |   |         |          |          |   |         |         |          |   |         |         |          |   |          |          |         |   |          |          |         |   |          |          |         |   |          |          |         |
| H                                                                                                                                                                                                                      | -0.40964                                                                                                                                                                                                                                                                                                                                                                                                                                                                                                                                                                                                                                                                                                                                                                                                                                                                                                                                                                                                                                                                                                                                                                                                                                                                                                                                                                                                                                                                                                                                                                                                                                                                                                                                                                                                                                                                                                                                                                                                                                                                                                                                                                                                                                                                                                                                                                                                                                                                                                                                                                                                                                                                                                                                                                                                                                                                                                                                                                                                                                                                                                                                                       | 4.89511  | -0.82758 |          |          |   |          |          |          |   |          |          |          |   |          |          |          |   |          |         |          |   |          |          |          |   |          |          |          |   |          |         |          |   |          |         |          |   |         |         |         |   |         |         |         |   |          |         |          |   |          |         |         |   |         |         |         |   |          |         |         |   |         |         |         |   |          |          |          |   |          |          |          |   |         |         |         |   |          |          |         |   |          |         |          |   |         |          |         |   |         |          |          |   |         |          |          |   |         |          |          |   |         |          |          |   |         |          |         |   |         |          |         |   |         |          |         |   |         |         |         |   |          |          |         |   |          |          |         |   |          |          |         |   |          |          |         |   |          |          |         |   |          |          |         |   |          |          |         |   |          |          |         |   |          |          |         |   |          |          |          |                                                                                                                                                                                                                       |                                                                                                                                                                                                                                                                                                                                                                                                                                                                                                                                                                                                                                                                                                                                                                                                                                                                                                                                                                                                                                                                                                                                                                                                                                                                                                                                                                                                                                                                                                                                                                                                                                                                                                                                                                                                                                                                                                                                                                                                                                                                                                                                                                                                                                                                                                                                                                                                                                                                                                                                                                                                                                                                                                                                                                                                                                                                                                                                         |          |          |          |          |         |         |          |          |         |          |                                                                                                                                                                                                                         |                                                                                                                                                                                                                                                                                                                                                                                                                                                                                                                                                                                                                                                                                                                                                                                                                                                                                                                                                                                                                                                                                                                                                                                                                                                                                                                                                                                                                                                                                                                                                                                                                                                                                                                                                                                                                                                                                                                                                                                                                                                                                                                                                                                                                                                                                                                                                                                                                                                                                                                                                                                                                                                                                                                                                                                                                                                                                                                                                                                                                                                                                                                                                             |   |          |          |          |   |          |          |          |   |          |          |          |   |          |          |          |   |          |          |          |   |          |          |          |   |          |          |          |   |          |         |         |   |          |         |         |   |         |         |         |   |          |         |         |   |          |         |         |   |         |          |          |   |          |          |          |   |         |         |         |   |         |          |          |   |          |          |          |   |          |         |          |   |          |          |          |   |          |          |         |   |          |          |         |   |          |          |          |   |         |          |         |   |         |          |         |   |         |          |          |   |          |          |         |   |          |          |          |   |          |          |          |   |          |          |          |   |          |          |          |   |          |         |          |   |          |         |          |   |          |         |          |   |          |         |          |   |          |         |          |   |         |          |          |   |         |          |          |   |         |         |          |   |         |         |          |   |          |          |         |   |          |          |         |   |          |          |         |   |          |          |         |
| H                                                                                                                                                                                                                      | -1.84386                                                                                                                                                                                                                                                                                                                                                                                                                                                                                                                                                                                                                                                                                                                                                                                                                                                                                                                                                                                                                                                                                                                                                                                                                                                                                                                                                                                                                                                                                                                                                                                                                                                                                                                                                                                                                                                                                                                                                                                                                                                                                                                                                                                                                                                                                                                                                                                                                                                                                                                                                                                                                                                                                                                                                                                                                                                                                                                                                                                                                                                                                                                                                       | 3.86150  | -0.88822 |          |          |   |          |          |          |   |          |          |          |   |          |          |          |   |          |         |          |   |          |          |          |   |          |          |          |   |          |         |          |   |          |         |          |   |         |         |         |   |         |         |         |   |          |         |          |   |          |         |         |   |         |         |         |   |          |         |         |   |         |         |         |   |          |          |          |   |          |          |          |   |         |         |         |   |          |          |         |   |          |         |          |   |         |          |         |   |         |          |          |   |         |          |          |   |         |          |          |   |         |          |          |   |         |          |         |   |         |          |         |   |         |          |         |   |         |         |         |   |          |          |         |   |          |          |         |   |          |          |         |   |          |          |         |   |          |          |         |   |          |          |         |   |          |          |         |   |          |          |         |   |          |          |         |   |          |          |          |                                                                                                                                                                                                                       |                                                                                                                                                                                                                                                                                                                                                                                                                                                                                                                                                                                                                                                                                                                                                                                                                                                                                                                                                                                                                                                                                                                                                                                                                                                                                                                                                                                                                                                                                                                                                                                                                                                                                                                                                                                                                                                                                                                                                                                                                                                                                                                                                                                                                                                                                                                                                                                                                                                                                                                                                                                                                                                                                                                                                                                                                                                                                                                                         |          |          |          |          |         |         |          |          |         |          |                                                                                                                                                                                                                         |                                                                                                                                                                                                                                                                                                                                                                                                                                                                                                                                                                                                                                                                                                                                                                                                                                                                                                                                                                                                                                                                                                                                                                                                                                                                                                                                                                                                                                                                                                                                                                                                                                                                                                                                                                                                                                                                                                                                                                                                                                                                                                                                                                                                                                                                                                                                                                                                                                                                                                                                                                                                                                                                                                                                                                                                                                                                                                                                                                                                                                                                                                                                                             |   |          |          |          |   |          |          |          |   |          |          |          |   |          |          |          |   |          |          |          |   |          |          |          |   |          |          |          |   |          |         |         |   |          |         |         |   |         |         |         |   |          |         |         |   |          |         |         |   |         |          |          |   |          |          |          |   |         |         |         |   |         |          |          |   |          |          |          |   |          |         |          |   |          |          |          |   |          |          |         |   |          |          |         |   |          |          |          |   |         |          |         |   |         |          |         |   |         |          |          |   |          |          |         |   |          |          |          |   |          |          |          |   |          |          |          |   |          |          |          |   |          |         |          |   |          |         |          |   |          |         |          |   |          |         |          |   |          |         |          |   |         |          |          |   |         |          |          |   |         |         |          |   |         |         |          |   |          |          |         |   |          |          |         |   |          |          |         |   |          |          |         |
| H                                                                                                                                                                                                                      | -1.01888                                                                                                                                                                                                                                                                                                                                                                                                                                                                                                                                                                                                                                                                                                                                                                                                                                                                                                                                                                                                                                                                                                                                                                                                                                                                                                                                                                                                                                                                                                                                                                                                                                                                                                                                                                                                                                                                                                                                                                                                                                                                                                                                                                                                                                                                                                                                                                                                                                                                                                                                                                                                                                                                                                                                                                                                                                                                                                                                                                                                                                                                                                                                                       | 4.34127  | -2.38225 |          |          |   |          |          |          |   |          |          |          |   |          |          |          |   |          |         |          |   |          |          |          |   |          |          |          |   |          |         |          |   |          |         |          |   |         |         |         |   |         |         |         |   |          |         |          |   |          |         |         |   |         |         |         |   |          |         |         |   |         |         |         |   |          |          |          |   |          |          |          |   |         |         |         |   |          |          |         |   |          |         |          |   |         |          |         |   |         |          |          |   |         |          |          |   |         |          |          |   |         |          |          |   |         |          |         |   |         |          |         |   |         |          |         |   |         |         |         |   |          |          |         |   |          |          |         |   |          |          |         |   |          |          |         |   |          |          |         |   |          |          |         |   |          |          |         |   |          |          |         |   |          |          |         |   |          |          |          |                                                                                                                                                                                                                       |                                                                                                                                                                                                                                                                                                                                                                                                                                                                                                                                                                                                                                                                                                                                                                                                                                                                                                                                                                                                                                                                                                                                                                                                                                                                                                                                                                                                                                                                                                                                                                                                                                                                                                                                                                                                                                                                                                                                                                                                                                                                                                                                                                                                                                                                                                                                                                                                                                                                                                                                                                                                                                                                                                                                                                                                                                                                                                                                         |          |          |          |          |         |         |          |          |         |          |                                                                                                                                                                                                                         |                                                                                                                                                                                                                                                                                                                                                                                                                                                                                                                                                                                                                                                                                                                                                                                                                                                                                                                                                                                                                                                                                                                                                                                                                                                                                                                                                                                                                                                                                                                                                                                                                                                                                                                                                                                                                                                                                                                                                                                                                                                                                                                                                                                                                                                                                                                                                                                                                                                                                                                                                                                                                                                                                                                                                                                                                                                                                                                                                                                                                                                                                                                                                             |   |          |          |          |   |          |          |          |   |          |          |          |   |          |          |          |   |          |          |          |   |          |          |          |   |          |          |          |   |          |         |         |   |          |         |         |   |         |         |         |   |          |         |         |   |          |         |         |   |         |          |          |   |          |          |          |   |         |         |         |   |         |          |          |   |          |          |          |   |          |         |          |   |          |          |          |   |          |          |         |   |          |          |         |   |          |          |          |   |         |          |         |   |         |          |         |   |         |          |          |   |          |          |         |   |          |          |          |   |          |          |          |   |          |          |          |   |          |          |          |   |          |         |          |   |          |         |          |   |          |         |          |   |          |         |          |   |          |         |          |   |         |          |          |   |         |          |          |   |         |         |          |   |         |         |          |   |          |          |         |   |          |          |         |   |          |          |         |   |          |          |         |
| C                                                                                                                                                                                                                      | 1.41758                                                                                                                                                                                                                                                                                                                                                                                                                                                                                                                                                                                                                                                                                                                                                                                                                                                                                                                                                                                                                                                                                                                                                                                                                                                                                                                                                                                                                                                                                                                                                                                                                                                                                                                                                                                                                                                                                                                                                                                                                                                                                                                                                                                                                                                                                                                                                                                                                                                                                                                                                                                                                                                                                                                                                                                                                                                                                                                                                                                                                                                                                                                                                        | 3.13178  | -1.81628 |          |          |   |          |          |          |   |          |          |          |   |          |          |          |   |          |         |          |   |          |          |          |   |          |          |          |   |          |         |          |   |          |         |          |   |         |         |         |   |         |         |         |   |          |         |          |   |          |         |         |   |         |         |         |   |          |         |         |   |         |         |         |   |          |          |          |   |          |          |          |   |         |         |         |   |          |          |         |   |          |         |          |   |         |          |         |   |         |          |          |   |         |          |          |   |         |          |          |   |         |          |          |   |         |          |         |   |         |          |         |   |         |          |         |   |         |         |         |   |          |          |         |   |          |          |         |   |          |          |         |   |          |          |         |   |          |          |         |   |          |          |         |   |          |          |         |   |          |          |         |   |          |          |         |   |          |          |          |                                                                                                                                                                                                                       |                                                                                                                                                                                                                                                                                                                                                                                                                                                                                                                                                                                                                                                                                                                                                                                                                                                                                                                                                                                                                                                                                                                                                                                                                                                                                                                                                                                                                                                                                                                                                                                                                                                                                                                                                                                                                                                                                                                                                                                                                                                                                                                                                                                                                                                                                                                                                                                                                                                                                                                                                                                                                                                                                                                                                                                                                                                                                                                                         |          |          |          |          |         |         |          |          |         |          |                                                                                                                                                                                                                         |                                                                                                                                                                                                                                                                                                                                                                                                                                                                                                                                                                                                                                                                                                                                                                                                                                                                                                                                                                                                                                                                                                                                                                                                                                                                                                                                                                                                                                                                                                                                                                                                                                                                                                                                                                                                                                                                                                                                                                                                                                                                                                                                                                                                                                                                                                                                                                                                                                                                                                                                                                                                                                                                                                                                                                                                                                                                                                                                                                                                                                                                                                                                                             |   |          |          |          |   |          |          |          |   |          |          |          |   |          |          |          |   |          |          |          |   |          |          |          |   |          |          |          |   |          |         |         |   |          |         |         |   |         |         |         |   |          |         |         |   |          |         |         |   |         |          |          |   |          |          |          |   |         |         |         |   |         |          |          |   |          |          |          |   |          |         |          |   |          |          |          |   |          |          |         |   |          |          |         |   |          |          |          |   |         |          |         |   |         |          |         |   |         |          |          |   |          |          |         |   |          |          |          |   |          |          |          |   |          |          |          |   |          |          |          |   |          |         |          |   |          |         |          |   |          |         |          |   |          |         |          |   |          |         |          |   |         |          |          |   |         |          |          |   |         |         |          |   |         |         |          |   |          |          |         |   |          |          |         |   |          |          |         |   |          |          |         |
| H                                                                                                                                                                                                                      | 1.87092                                                                                                                                                                                                                                                                                                                                                                                                                                                                                                                                                                                                                                                                                                                                                                                                                                                                                                                                                                                                                                                                                                                                                                                                                                                                                                                                                                                                                                                                                                                                                                                                                                                                                                                                                                                                                                                                                                                                                                                                                                                                                                                                                                                                                                                                                                                                                                                                                                                                                                                                                                                                                                                                                                                                                                                                                                                                                                                                                                                                                                                                                                                                                        | 3.87502  | -1.15596 |          |          |   |          |          |          |   |          |          |          |   |          |          |          |   |          |         |          |   |          |          |          |   |          |          |          |   |          |         |          |   |          |         |          |   |         |         |         |   |         |         |         |   |          |         |          |   |          |         |         |   |         |         |         |   |          |         |         |   |         |         |         |   |          |          |          |   |          |          |          |   |         |         |         |   |          |          |         |   |          |         |          |   |         |          |         |   |         |          |          |   |         |          |          |   |         |          |          |   |         |          |          |   |         |          |         |   |         |          |         |   |         |          |         |   |         |         |         |   |          |          |         |   |          |          |         |   |          |          |         |   |          |          |         |   |          |          |         |   |          |          |         |   |          |          |         |   |          |          |         |   |          |          |         |   |          |          |          |                                                                                                                                                                                                                       |                                                                                                                                                                                                                                                                                                                                                                                                                                                                                                                                                                                                                                                                                                                                                                                                                                                                                                                                                                                                                                                                                                                                                                                                                                                                                                                                                                                                                                                                                                                                                                                                                                                                                                                                                                                                                                                                                                                                                                                                                                                                                                                                                                                                                                                                                                                                                                                                                                                                                                                                                                                                                                                                                                                                                                                                                                                                                                                                         |          |          |          |          |         |         |          |          |         |          |                                                                                                                                                                                                                         |                                                                                                                                                                                                                                                                                                                                                                                                                                                                                                                                                                                                                                                                                                                                                                                                                                                                                                                                                                                                                                                                                                                                                                                                                                                                                                                                                                                                                                                                                                                                                                                                                                                                                                                                                                                                                                                                                                                                                                                                                                                                                                                                                                                                                                                                                                                                                                                                                                                                                                                                                                                                                                                                                                                                                                                                                                                                                                                                                                                                                                                                                                                                                             |   |          |          |          |   |          |          |          |   |          |          |          |   |          |          |          |   |          |          |          |   |          |          |          |   |          |          |          |   |          |         |         |   |          |         |         |   |         |         |         |   |          |         |         |   |          |         |         |   |         |          |          |   |          |          |          |   |         |         |         |   |         |          |          |   |          |          |          |   |          |         |          |   |          |          |          |   |          |          |         |   |          |          |         |   |          |          |          |   |         |          |         |   |         |          |         |   |         |          |          |   |          |          |         |   |          |          |          |   |          |          |          |   |          |          |          |   |          |          |          |   |          |         |          |   |          |         |          |   |          |         |          |   |          |         |          |   |          |         |          |   |         |          |          |   |         |          |          |   |         |         |          |   |         |         |          |   |          |          |         |   |          |          |         |   |          |          |         |   |          |          |         |
| H                                                                                                                                                                                                                      | 1.36895                                                                                                                                                                                                                                                                                                                                                                                                                                                                                                                                                                                                                                                                                                                                                                                                                                                                                                                                                                                                                                                                                                                                                                                                                                                                                                                                                                                                                                                                                                                                                                                                                                                                                                                                                                                                                                                                                                                                                                                                                                                                                                                                                                                                                                                                                                                                                                                                                                                                                                                                                                                                                                                                                                                                                                                                                                                                                                                                                                                                                                                                                                                                                        | 3.55407  | -2.82310 |          |          |   |          |          |          |   |          |          |          |   |          |          |          |   |          |         |          |   |          |          |          |   |          |          |          |   |          |         |          |   |          |         |          |   |         |         |         |   |         |         |         |   |          |         |          |   |          |         |         |   |         |         |         |   |          |         |         |   |         |         |         |   |          |          |          |   |          |          |          |   |         |         |         |   |          |          |         |   |          |         |          |   |         |          |         |   |         |          |          |   |         |          |          |   |         |          |          |   |         |          |          |   |         |          |         |   |         |          |         |   |         |          |         |   |         |         |         |   |          |          |         |   |          |          |         |   |          |          |         |   |          |          |         |   |          |          |         |   |          |          |         |   |          |          |         |   |          |          |         |   |          |          |         |   |          |          |          |                                                                                                                                                                                                                       |                                                                                                                                                                                                                                                                                                                                                                                                                                                                                                                                                                                                                                                                                                                                                                                                                                                                                                                                                                                                                                                                                                                                                                                                                                                                                                                                                                                                                                                                                                                                                                                                                                                                                                                                                                                                                                                                                                                                                                                                                                                                                                                                                                                                                                                                                                                                                                                                                                                                                                                                                                                                                                                                                                                                                                                                                                                                                                                                         |          |          |          |          |         |         |          |          |         |          |                                                                                                                                                                                                                         |                                                                                                                                                                                                                                                                                                                                                                                                                                                                                                                                                                                                                                                                                                                                                                                                                                                                                                                                                                                                                                                                                                                                                                                                                                                                                                                                                                                                                                                                                                                                                                                                                                                                                                                                                                                                                                                                                                                                                                                                                                                                                                                                                                                                                                                                                                                                                                                                                                                                                                                                                                                                                                                                                                                                                                                                                                                                                                                                                                                                                                                                                                                                                             |   |          |          |          |   |          |          |          |   |          |          |          |   |          |          |          |   |          |          |          |   |          |          |          |   |          |          |          |   |          |         |         |   |          |         |         |   |         |         |         |   |          |         |         |   |          |         |         |   |         |          |          |   |          |          |          |   |         |         |         |   |         |          |          |   |          |          |          |   |          |         |          |   |          |          |          |   |          |          |         |   |          |          |         |   |          |          |          |   |         |          |         |   |         |          |         |   |         |          |          |   |          |          |         |   |          |          |          |   |          |          |          |   |          |          |          |   |          |          |          |   |          |         |          |   |          |         |          |   |          |         |          |   |          |         |          |   |          |         |          |   |         |          |          |   |         |          |          |   |         |         |          |   |         |         |          |   |          |          |         |   |          |          |         |   |          |          |         |   |          |          |         |
| H                                                                                                                                                                                                                      | 2.07886                                                                                                                                                                                                                                                                                                                                                                                                                                                                                                                                                                                                                                                                                                                                                                                                                                                                                                                                                                                                                                                                                                                                                                                                                                                                                                                                                                                                                                                                                                                                                                                                                                                                                                                                                                                                                                                                                                                                                                                                                                                                                                                                                                                                                                                                                                                                                                                                                                                                                                                                                                                                                                                                                                                                                                                                                                                                                                                                                                                                                                                                                                                                                        | 2.26339  | -1.83363 |          |          |   |          |          |          |   |          |          |          |   |          |          |          |   |          |         |          |   |          |          |          |   |          |          |          |   |          |         |          |   |          |         |          |   |         |         |         |   |         |         |         |   |          |         |          |   |          |         |         |   |         |         |         |   |          |         |         |   |         |         |         |   |          |          |          |   |          |          |          |   |         |         |         |   |          |          |         |   |          |         |          |   |         |          |         |   |         |          |          |   |         |          |          |   |         |          |          |   |         |          |          |   |         |          |         |   |         |          |         |   |         |          |         |   |         |         |         |   |          |          |         |   |          |          |         |   |          |          |         |   |          |          |         |   |          |          |         |   |          |          |         |   |          |          |         |   |          |          |         |   |          |          |         |   |          |          |          |                                                                                                                                                                                                                       |                                                                                                                                                                                                                                                                                                                                                                                                                                                                                                                                                                                                                                                                                                                                                                                                                                                                                                                                                                                                                                                                                                                                                                                                                                                                                                                                                                                                                                                                                                                                                                                                                                                                                                                                                                                                                                                                                                                                                                                                                                                                                                                                                                                                                                                                                                                                                                                                                                                                                                                                                                                                                                                                                                                                                                                                                                                                                                                                         |          |          |          |          |         |         |          |          |         |          |                                                                                                                                                                                                                         |                                                                                                                                                                                                                                                                                                                                                                                                                                                                                                                                                                                                                                                                                                                                                                                                                                                                                                                                                                                                                                                                                                                                                                                                                                                                                                                                                                                                                                                                                                                                                                                                                                                                                                                                                                                                                                                                                                                                                                                                                                                                                                                                                                                                                                                                                                                                                                                                                                                                                                                                                                                                                                                                                                                                                                                                                                                                                                                                                                                                                                                                                                                                                             |   |          |          |          |   |          |          |          |   |          |          |          |   |          |          |          |   |          |          |          |   |          |          |          |   |          |          |          |   |          |         |         |   |          |         |         |   |         |         |         |   |          |         |         |   |          |         |         |   |         |          |          |   |          |          |          |   |         |         |         |   |         |          |          |   |          |          |          |   |          |         |          |   |          |          |          |   |          |          |         |   |          |          |         |   |          |          |          |   |         |          |         |   |         |          |         |   |         |          |          |   |          |          |         |   |          |          |          |   |          |          |          |   |          |          |          |   |          |          |          |   |          |         |          |   |          |         |          |   |          |         |          |   |          |         |          |   |          |         |          |   |         |          |          |   |         |          |          |   |         |         |          |   |         |         |          |   |          |          |         |   |          |          |         |   |          |          |         |   |          |          |         |
| C                                                                                                                                                                                                                      | -1.23112                                                                                                                                                                                                                                                                                                                                                                                                                                                                                                                                                                                                                                                                                                                                                                                                                                                                                                                                                                                                                                                                                                                                                                                                                                                                                                                                                                                                                                                                                                                                                                                                                                                                                                                                                                                                                                                                                                                                                                                                                                                                                                                                                                                                                                                                                                                                                                                                                                                                                                                                                                                                                                                                                                                                                                                                                                                                                                                                                                                                                                                                                                                                                       | -2.78812 | 1.94957  |          |          |   |          |          |          |   |          |          |          |   |          |          |          |   |          |         |          |   |          |          |          |   |          |          |          |   |          |         |          |   |          |         |          |   |         |         |         |   |         |         |         |   |          |         |          |   |          |         |         |   |         |         |         |   |          |         |         |   |         |         |         |   |          |          |          |   |          |          |          |   |         |         |         |   |          |          |         |   |          |         |          |   |         |          |         |   |         |          |          |   |         |          |          |   |         |          |          |   |         |          |          |   |         |          |         |   |         |          |         |   |         |          |         |   |         |         |         |   |          |          |         |   |          |          |         |   |          |          |         |   |          |          |         |   |          |          |         |   |          |          |         |   |          |          |         |   |          |          |         |   |          |          |         |   |          |          |          |                                                                                                                                                                                                                       |                                                                                                                                                                                                                                                                                                                                                                                                                                                                                                                                                                                                                                                                                                                                                                                                                                                                                                                                                                                                                                                                                                                                                                                                                                                                                                                                                                                                                                                                                                                                                                                                                                                                                                                                                                                                                                                                                                                                                                                                                                                                                                                                                                                                                                                                                                                                                                                                                                                                                                                                                                                                                                                                                                                                                                                                                                                                                                                                         |          |          |          |          |         |         |          |          |         |          |                                                                                                                                                                                                                         |                                                                                                                                                                                                                                                                                                                                                                                                                                                                                                                                                                                                                                                                                                                                                                                                                                                                                                                                                                                                                                                                                                                                                                                                                                                                                                                                                                                                                                                                                                                                                                                                                                                                                                                                                                                                                                                                                                                                                                                                                                                                                                                                                                                                                                                                                                                                                                                                                                                                                                                                                                                                                                                                                                                                                                                                                                                                                                                                                                                                                                                                                                                                                             |   |          |          |          |   |          |          |          |   |          |          |          |   |          |          |          |   |          |          |          |   |          |          |          |   |          |          |          |   |          |         |         |   |          |         |         |   |         |         |         |   |          |         |         |   |          |         |         |   |         |          |          |   |          |          |          |   |         |         |         |   |         |          |          |   |          |          |          |   |          |         |          |   |          |          |          |   |          |          |         |   |          |          |         |   |          |          |          |   |         |          |         |   |         |          |         |   |         |          |          |   |          |          |         |   |          |          |          |   |          |          |          |   |          |          |          |   |          |          |          |   |          |         |          |   |          |         |          |   |          |         |          |   |          |         |          |   |          |         |          |   |         |          |          |   |         |          |          |   |         |         |          |   |         |         |          |   |          |          |         |   |          |          |         |   |          |          |         |   |          |          |         |
| H                                                                                                                                                                                                                      | -1.69925                                                                                                                                                                                                                                                                                                                                                                                                                                                                                                                                                                                                                                                                                                                                                                                                                                                                                                                                                                                                                                                                                                                                                                                                                                                                                                                                                                                                                                                                                                                                                                                                                                                                                                                                                                                                                                                                                                                                                                                                                                                                                                                                                                                                                                                                                                                                                                                                                                                                                                                                                                                                                                                                                                                                                                                                                                                                                                                                                                                                                                                                                                                                                       | -1.86512 | 2.28276  |          |          |   |          |          |          |   |          |          |          |   |          |          |          |   |          |         |          |   |          |          |          |   |          |          |          |   |          |         |          |   |          |         |          |   |         |         |         |   |         |         |         |   |          |         |          |   |          |         |         |   |         |         |         |   |          |         |         |   |         |         |         |   |          |          |          |   |          |          |          |   |         |         |         |   |          |          |         |   |          |         |          |   |         |          |         |   |         |          |          |   |         |          |          |   |         |          |          |   |         |          |          |   |         |          |         |   |         |          |         |   |         |          |         |   |         |         |         |   |          |          |         |   |          |          |         |   |          |          |         |   |          |          |         |   |          |          |         |   |          |          |         |   |          |          |         |   |          |          |         |   |          |          |         |   |          |          |          |                                                                                                                                                                                                                       |                                                                                                                                                                                                                                                                                                                                                                                                                                                                                                                                                                                                                                                                                                                                                                                                                                                                                                                                                                                                                                                                                                                                                                                                                                                                                                                                                                                                                                                                                                                                                                                                                                                                                                                                                                                                                                                                                                                                                                                                                                                                                                                                                                                                                                                                                                                                                                                                                                                                                                                                                                                                                                                                                                                                                                                                                                                                                                                                         |          |          |          |          |         |         |          |          |         |          |                                                                                                                                                                                                                         |                                                                                                                                                                                                                                                                                                                                                                                                                                                                                                                                                                                                                                                                                                                                                                                                                                                                                                                                                                                                                                                                                                                                                                                                                                                                                                                                                                                                                                                                                                                                                                                                                                                                                                                                                                                                                                                                                                                                                                                                                                                                                                                                                                                                                                                                                                                                                                                                                                                                                                                                                                                                                                                                                                                                                                                                                                                                                                                                                                                                                                                                                                                                                             |   |          |          |          |   |          |          |          |   |          |          |          |   |          |          |          |   |          |          |          |   |          |          |          |   |          |          |          |   |          |         |         |   |          |         |         |   |         |         |         |   |          |         |         |   |          |         |         |   |         |          |          |   |          |          |          |   |         |         |         |   |         |          |          |   |          |          |          |   |          |         |          |   |          |          |          |   |          |          |         |   |          |          |         |   |          |          |          |   |         |          |         |   |         |          |         |   |         |          |          |   |          |          |         |   |          |          |          |   |          |          |          |   |          |          |          |   |          |          |          |   |          |         |          |   |          |         |          |   |          |         |          |   |          |         |          |   |          |         |          |   |         |          |          |   |         |          |          |   |         |         |          |   |         |         |          |   |          |          |         |   |          |          |         |   |          |          |         |   |          |          |         |
| H                                                                                                                                                                                                                      | -0.95650                                                                                                                                                                                                                                                                                                                                                                                                                                                                                                                                                                                                                                                                                                                                                                                                                                                                                                                                                                                                                                                                                                                                                                                                                                                                                                                                                                                                                                                                                                                                                                                                                                                                                                                                                                                                                                                                                                                                                                                                                                                                                                                                                                                                                                                                                                                                                                                                                                                                                                                                                                                                                                                                                                                                                                                                                                                                                                                                                                                                                                                                                                                                                       | -3.36478 | 2.83665  |          |          |   |          |          |          |   |          |          |          |   |          |          |          |   |          |         |          |   |          |          |          |   |          |          |          |   |          |         |          |   |          |         |          |   |         |         |         |   |         |         |         |   |          |         |          |   |          |         |         |   |         |         |         |   |          |         |         |   |         |         |         |   |          |          |          |   |          |          |          |   |         |         |         |   |          |          |         |   |          |         |          |   |         |          |         |   |         |          |          |   |         |          |          |   |         |          |          |   |         |          |          |   |         |          |         |   |         |          |         |   |         |          |         |   |         |         |         |   |          |          |         |   |          |          |         |   |          |          |         |   |          |          |         |   |          |          |         |   |          |          |         |   |          |          |         |   |          |          |         |   |          |          |         |   |          |          |          |                                                                                                                                                                                                                       |                                                                                                                                                                                                                                                                                                                                                                                                                                                                                                                                                                                                                                                                                                                                                                                                                                                                                                                                                                                                                                                                                                                                                                                                                                                                                                                                                                                                                                                                                                                                                                                                                                                                                                                                                                                                                                                                                                                                                                                                                                                                                                                                                                                                                                                                                                                                                                                                                                                                                                                                                                                                                                                                                                                                                                                                                                                                                                                                         |          |          |          |          |         |         |          |          |         |          |                                                                                                                                                                                                                         |                                                                                                                                                                                                                                                                                                                                                                                                                                                                                                                                                                                                                                                                                                                                                                                                                                                                                                                                                                                                                                                                                                                                                                                                                                                                                                                                                                                                                                                                                                                                                                                                                                                                                                                                                                                                                                                                                                                                                                                                                                                                                                                                                                                                                                                                                                                                                                                                                                                                                                                                                                                                                                                                                                                                                                                                                                                                                                                                                                                                                                                                                                                                                             |   |          |          |          |   |          |          |          |   |          |          |          |   |          |          |          |   |          |          |          |   |          |          |          |   |          |          |          |   |          |         |         |   |          |         |         |   |         |         |         |   |          |         |         |   |          |         |         |   |         |          |          |   |          |          |          |   |         |         |         |   |         |          |          |   |          |          |          |   |          |         |          |   |          |          |          |   |          |          |         |   |          |          |         |   |          |          |          |   |         |          |         |   |         |          |         |   |         |          |          |   |          |          |         |   |          |          |          |   |          |          |          |   |          |          |          |   |          |          |          |   |          |         |          |   |          |         |          |   |          |         |          |   |          |         |          |   |          |         |          |   |         |          |          |   |         |          |          |   |         |         |          |   |         |         |          |   |          |          |         |   |          |          |         |   |          |          |         |   |          |          |         |
| H                                                                                                                                                                                                                      | -1.99137                                                                                                                                                                                                                                                                                                                                                                                                                                                                                                                                                                                                                                                                                                                                                                                                                                                                                                                                                                                                                                                                                                                                                                                                                                                                                                                                                                                                                                                                                                                                                                                                                                                                                                                                                                                                                                                                                                                                                                                                                                                                                                                                                                                                                                                                                                                                                                                                                                                                                                                                                                                                                                                                                                                                                                                                                                                                                                                                                                                                                                                                                                                                                       | -3.34987 | 1.40261  |          |          |   |          |          |          |   |          |          |          |   |          |          |          |   |          |         |          |   |          |          |          |   |          |          |          |   |          |         |          |   |          |         |          |   |         |         |         |   |         |         |         |   |          |         |          |   |          |         |         |   |         |         |         |   |          |         |         |   |         |         |         |   |          |          |          |   |          |          |          |   |         |         |         |   |          |          |         |   |          |         |          |   |         |          |         |   |         |          |          |   |         |          |          |   |         |          |          |   |         |          |          |   |         |          |         |   |         |          |         |   |         |          |         |   |         |         |         |   |          |          |         |   |          |          |         |   |          |          |         |   |          |          |         |   |          |          |         |   |          |          |         |   |          |          |         |   |          |          |         |   |          |          |         |   |          |          |          |                                                                                                                                                                                                                       |                                                                                                                                                                                                                                                                                                                                                                                                                                                                                                                                                                                                                                                                                                                                                                                                                                                                                                                                                                                                                                                                                                                                                                                                                                                                                                                                                                                                                                                                                                                                                                                                                                                                                                                                                                                                                                                                                                                                                                                                                                                                                                                                                                                                                                                                                                                                                                                                                                                                                                                                                                                                                                                                                                                                                                                                                                                                                                                                         |          |          |          |          |         |         |          |          |         |          |                                                                                                                                                                                                                         |                                                                                                                                                                                                                                                                                                                                                                                                                                                                                                                                                                                                                                                                                                                                                                                                                                                                                                                                                                                                                                                                                                                                                                                                                                                                                                                                                                                                                                                                                                                                                                                                                                                                                                                                                                                                                                                                                                                                                                                                                                                                                                                                                                                                                                                                                                                                                                                                                                                                                                                                                                                                                                                                                                                                                                                                                                                                                                                                                                                                                                                                                                                                                             |   |          |          |          |   |          |          |          |   |          |          |          |   |          |          |          |   |          |          |          |   |          |          |          |   |          |          |          |   |          |         |         |   |          |         |         |   |         |         |         |   |          |         |         |   |          |         |         |   |         |          |          |   |          |          |          |   |         |         |         |   |         |          |          |   |          |          |          |   |          |         |          |   |          |          |          |   |          |          |         |   |          |          |         |   |          |          |          |   |         |          |         |   |         |          |         |   |         |          |          |   |          |          |         |   |          |          |          |   |          |          |          |   |          |          |          |   |          |          |          |   |          |         |          |   |          |         |          |   |          |         |          |   |          |         |          |   |          |         |          |   |         |          |          |   |         |          |          |   |         |         |          |   |         |         |          |   |          |          |         |   |          |          |         |   |          |          |         |   |          |          |         |

|                                                                                                                                                                                                                       |                                                                                                                                                                                                                                                                                                                                                                                                                                                                                                                                                                                                                                                                                                                                                                                                                                                                                                                                                                                                                                                                                                                                                                                                                                                                                                                                                                                                                                                                                                                                                                                                                                                                                                                                                                                                                                                                                                                                                                                                                                                                                                                                                                                                                                                                                                                                                                                                                                                                                                                                                                                                                                                                                                                                                                                                                                                                                                                                                                                                                                                                                    |          |          |         |          |   |          |         |          |   |          |          |          |   |          |         |          |   |          |         |          |   |          |          |          |   |          |          |          |   |          |         |          |   |          |         |         |   |          |         |         |   |         |         |         |   |          |         |         |   |          |         |         |   |         |         |         |   |          |         |         |   |          |         |         |   |         |         |         |   |          |         |          |   |          |         |          |   |          |         |         |   |         |         |          |   |         |          |          |   |         |          |          |   |         |          |          |   |         |          |         |   |         |         |         |   |         |         |         |   |          |         |         |   |          |         |         |   |          |         |          |   |          |         |          |                                                                                                                                                                                                                       |                                                                                                                                                                                                                                                                                                                                                                                                                                                                                                                                                                                                                                                                                                                                                                                                                                                                                                                                                                                                                                                                                                                                                                                                                                                                                                                                                                                                                                                                                                                                                                                                                                                                                                                                                                                                                                                                                                                                                                                                                                                                                                                                                                                                                                                                                |         |          |          |          |         |          |          |          |          |          |          |          |          |         |          |          |          |          |         |          |          |         |          |          |          |         |          |          |          |          |         |          |          |          |         |         |          |          |         |          |          |          |                                                                                                                                                                                                                        |                                                                                                                                                                                                                                                                                                                                                                                                                                                                                                                                                                                                                                                                                                                                                                                                                                                                                                                                                                                                                                                                                                                                                                                                                                                                                                                                                                                                                                                                                                                                                                                                                                                                                                                                                                                                                                                                                                                                                                                                                                                                                                                                                                                                                                                                                                                                                                                                                                                                                                                                                                                                                                                                                                                                                                                                                                                                                                                                                                                                                                                                                      |   |          |          |          |   |          |         |          |   |          |          |          |   |          |         |          |   |          |         |          |   |          |          |          |   |          |          |          |   |         |         |          |   |          |         |          |   |          |         |          |   |          |         |          |   |          |          |         |   |          |          |         |   |         |          |         |   |          |          |         |   |         |          |         |   |         |          |          |   |          |          |          |   |          |          |          |   |          |         |          |   |         |          |          |   |         |          |          |   |         |          |          |   |         |          |          |   |         |          |          |   |         |          |          |   |         |          |          |   |         |          |          |   |         |         |          |   |         |         |          |   |         |         |          |   |         |         |          |   |         |         |          |   |          |          |         |   |          |         |         |   |          |         |         |   |          |         |         |   |          |         |         |   |          |          |         |   |          |          |         |   |          |          |         |   |          |          |         |
|-----------------------------------------------------------------------------------------------------------------------------------------------------------------------------------------------------------------------|------------------------------------------------------------------------------------------------------------------------------------------------------------------------------------------------------------------------------------------------------------------------------------------------------------------------------------------------------------------------------------------------------------------------------------------------------------------------------------------------------------------------------------------------------------------------------------------------------------------------------------------------------------------------------------------------------------------------------------------------------------------------------------------------------------------------------------------------------------------------------------------------------------------------------------------------------------------------------------------------------------------------------------------------------------------------------------------------------------------------------------------------------------------------------------------------------------------------------------------------------------------------------------------------------------------------------------------------------------------------------------------------------------------------------------------------------------------------------------------------------------------------------------------------------------------------------------------------------------------------------------------------------------------------------------------------------------------------------------------------------------------------------------------------------------------------------------------------------------------------------------------------------------------------------------------------------------------------------------------------------------------------------------------------------------------------------------------------------------------------------------------------------------------------------------------------------------------------------------------------------------------------------------------------------------------------------------------------------------------------------------------------------------------------------------------------------------------------------------------------------------------------------------------------------------------------------------------------------------------------------------------------------------------------------------------------------------------------------------------------------------------------------------------------------------------------------------------------------------------------------------------------------------------------------------------------------------------------------------------------------------------------------------------------------------------------------------|----------|----------|---------|----------|---|----------|---------|----------|---|----------|----------|----------|---|----------|---------|----------|---|----------|---------|----------|---|----------|----------|----------|---|----------|----------|----------|---|----------|---------|----------|---|----------|---------|---------|---|----------|---------|---------|---|---------|---------|---------|---|----------|---------|---------|---|----------|---------|---------|---|---------|---------|---------|---|----------|---------|---------|---|----------|---------|---------|---|---------|---------|---------|---|----------|---------|----------|---|----------|---------|----------|---|----------|---------|---------|---|---------|---------|----------|---|---------|----------|----------|---|---------|----------|----------|---|---------|----------|----------|---|---------|----------|---------|---|---------|---------|---------|---|---------|---------|---------|---|----------|---------|---------|---|----------|---------|---------|---|----------|---------|----------|---|----------|---------|----------|-----------------------------------------------------------------------------------------------------------------------------------------------------------------------------------------------------------------------|--------------------------------------------------------------------------------------------------------------------------------------------------------------------------------------------------------------------------------------------------------------------------------------------------------------------------------------------------------------------------------------------------------------------------------------------------------------------------------------------------------------------------------------------------------------------------------------------------------------------------------------------------------------------------------------------------------------------------------------------------------------------------------------------------------------------------------------------------------------------------------------------------------------------------------------------------------------------------------------------------------------------------------------------------------------------------------------------------------------------------------------------------------------------------------------------------------------------------------------------------------------------------------------------------------------------------------------------------------------------------------------------------------------------------------------------------------------------------------------------------------------------------------------------------------------------------------------------------------------------------------------------------------------------------------------------------------------------------------------------------------------------------------------------------------------------------------------------------------------------------------------------------------------------------------------------------------------------------------------------------------------------------------------------------------------------------------------------------------------------------------------------------------------------------------------------------------------------------------------------------------------------------------|---------|----------|----------|----------|---------|----------|----------|----------|----------|----------|----------|----------|----------|---------|----------|----------|----------|----------|---------|----------|----------|---------|----------|----------|----------|---------|----------|----------|----------|----------|---------|----------|----------|----------|---------|---------|----------|----------|---------|----------|----------|----------|------------------------------------------------------------------------------------------------------------------------------------------------------------------------------------------------------------------------|--------------------------------------------------------------------------------------------------------------------------------------------------------------------------------------------------------------------------------------------------------------------------------------------------------------------------------------------------------------------------------------------------------------------------------------------------------------------------------------------------------------------------------------------------------------------------------------------------------------------------------------------------------------------------------------------------------------------------------------------------------------------------------------------------------------------------------------------------------------------------------------------------------------------------------------------------------------------------------------------------------------------------------------------------------------------------------------------------------------------------------------------------------------------------------------------------------------------------------------------------------------------------------------------------------------------------------------------------------------------------------------------------------------------------------------------------------------------------------------------------------------------------------------------------------------------------------------------------------------------------------------------------------------------------------------------------------------------------------------------------------------------------------------------------------------------------------------------------------------------------------------------------------------------------------------------------------------------------------------------------------------------------------------------------------------------------------------------------------------------------------------------------------------------------------------------------------------------------------------------------------------------------------------------------------------------------------------------------------------------------------------------------------------------------------------------------------------------------------------------------------------------------------------------------------------------------------------------------------------------------------------------------------------------------------------------------------------------------------------------------------------------------------------------------------------------------------------------------------------------------------------------------------------------------------------------------------------------------------------------------------------------------------------------------------------------------------------|---|----------|----------|----------|---|----------|---------|----------|---|----------|----------|----------|---|----------|---------|----------|---|----------|---------|----------|---|----------|----------|----------|---|----------|----------|----------|---|---------|---------|----------|---|----------|---------|----------|---|----------|---------|----------|---|----------|---------|----------|---|----------|----------|---------|---|----------|----------|---------|---|---------|----------|---------|---|----------|----------|---------|---|---------|----------|---------|---|---------|----------|----------|---|----------|----------|----------|---|----------|----------|----------|---|----------|---------|----------|---|---------|----------|----------|---|---------|----------|----------|---|---------|----------|----------|---|---------|----------|----------|---|---------|----------|----------|---|---------|----------|----------|---|---------|----------|----------|---|---------|----------|----------|---|---------|---------|----------|---|---------|---------|----------|---|---------|---------|----------|---|---------|---------|----------|---|---------|---------|----------|---|----------|----------|---------|---|----------|---------|---------|---|----------|---------|---------|---|----------|---------|---------|---|----------|---------|---------|---|----------|----------|---------|---|----------|----------|---------|---|----------|----------|---------|---|----------|----------|---------|
| 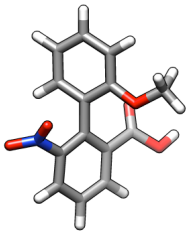 <p><b>2e</b><br/>                     -970.7906701<br/>                     -970.6285558<br/>                     -971.4596677</p>  | <table border="1"> <tbody> <tr><td>C</td><td>1.79345</td><td>6.41208</td><td>0.15526</td></tr> <tr><td>C</td><td>1.17261</td><td>4.19394</td><td>1.72996</td></tr> <tr><td>C</td><td>2.03560</td><td>5.12936</td><td>-0.33158</td></tr> <tr><td>C</td><td>1.24527</td><td>6.59643</td><td>1.41619</td></tr> <tr><td>C</td><td>0.94313</td><td>5.48398</td><td>2.19445</td></tr> <tr><td>C</td><td>1.72392</td><td>4.01984</td><td>0.44973</td></tr> <tr><td>H</td><td>2.46863</td><td>5.00254</td><td>-1.31222</td></tr> <tr><td>H</td><td>0.51677</td><td>5.61478</td><td>3.18084</td></tr> <tr><td>C</td><td>0.85086</td><td>3.02846</td><td>2.58819</td></tr> <tr><td>C</td><td>0.26248</td><td>0.86969</td><td>4.33107</td></tr> <tr><td>C</td><td>1.41050</td><td>2.91036</td><td>3.86356</td></tr> <tr><td>C</td><td>-0.02780</td><td>1.99648</td><td>2.20515</td></tr> <tr><td>C</td><td>-0.28725</td><td>0.92349</td><td>3.05836</td></tr> <tr><td>C</td><td>1.11122</td><td>1.88336</td><td>4.74627</td></tr> <tr><td>H</td><td>-0.94265</td><td>0.13870</td><td>2.70767</td></tr> <tr><td>H</td><td>1.56182</td><td>1.88222</td><td>5.72839</td></tr> <tr><td>H</td><td>1.05631</td><td>7.59115</td><td>1.79509</td></tr> <tr><td>H</td><td>2.04034</td><td>7.26616</td><td>-0.46172</td></tr> <tr><td>H</td><td>0.03555</td><td>0.04459</td><td>4.99161</td></tr> <tr><td>O</td><td>1.91722</td><td>2.73420</td><td>0.05451</td></tr> <tr><td>C</td><td>2.43543</td><td>2.49476</td><td>-1.24476</td></tr> <tr><td>H</td><td>1.78191</td><td>2.92210</td><td>-2.01160</td></tr> <tr><td>H</td><td>2.47611</td><td>1.41393</td><td>-1.35610</td></tr> <tr><td>H</td><td>3.43837</td><td>2.91902</td><td>-1.34926</td></tr> <tr><td>N</td><td>2.42574</td><td>3.87950</td><td>4.33132</td></tr> <tr><td>O</td><td>3.39809</td><td>4.06395</td><td>3.62350</td></tr> <tr><td>O</td><td>2.23106</td><td>4.39968</td><td>5.41976</td></tr> <tr><td>C</td><td>-0.74118</td><td>1.94953</td><td>0.89107</td></tr> <tr><td>O</td><td>-0.97969</td><td>0.92698</td><td>0.29845</td></tr> <tr><td>O</td><td>-1.15897</td><td>3.15611</td><td>0.45772</td></tr> <tr><td>H</td><td>-1.61247</td><td>3.01438</td><td>-0.38529</td></tr> </tbody> </table>                                                                                                                                                                                                                                                                                                                                                                                                                                                                                                                                                                                                                                                                                                                                                                                                                            | C        | 1.79345  | 6.41208 | 0.15526  | C | 1.17261  | 4.19394 | 1.72996  | C | 2.03560  | 5.12936  | -0.33158 | C | 1.24527  | 6.59643 | 1.41619  | C | 0.94313  | 5.48398 | 2.19445  | C | 1.72392  | 4.01984  | 0.44973  | H | 2.46863  | 5.00254  | -1.31222 | H | 0.51677  | 5.61478 | 3.18084  | C | 0.85086  | 3.02846 | 2.58819 | C | 0.26248  | 0.86969 | 4.33107 | C | 1.41050 | 2.91036 | 3.86356 | C | -0.02780 | 1.99648 | 2.20515 | C | -0.28725 | 0.92349 | 3.05836 | C | 1.11122 | 1.88336 | 4.74627 | H | -0.94265 | 0.13870 | 2.70767 | H | 1.56182  | 1.88222 | 5.72839 | H | 1.05631 | 7.59115 | 1.79509 | H | 2.04034  | 7.26616 | -0.46172 | H | 0.03555  | 0.04459 | 4.99161  | O | 1.91722  | 2.73420 | 0.05451 | C | 2.43543 | 2.49476 | -1.24476 | H | 1.78191 | 2.92210  | -2.01160 | H | 2.47611 | 1.41393  | -1.35610 | H | 3.43837 | 2.91902  | -1.34926 | N | 2.42574 | 3.87950  | 4.33132 | O | 3.39809 | 4.06395 | 3.62350 | O | 2.23106 | 4.39968 | 5.41976 | C | -0.74118 | 1.94953 | 0.89107 | O | -0.97969 | 0.92698 | 0.29845 | O | -1.15897 | 3.15611 | 0.45772  | H | -1.61247 | 3.01438 | -0.38529 |  <p><b>2e</b><br/>                     -970.7581536<br/>                     -970.5962381<br/>                     -971.4289190</p> | <table border="1"> <tbody> <tr><td>C</td><td>0.38989</td><td>-1.63142</td><td>-3.38514</td></tr> <tr><td>C</td><td>0.22305</td><td>-0.26435</td><td>-0.88930</td></tr> <tr><td>C</td><td>0.28289</td><td>-2.34220</td><td>-2.20228</td></tr> <tr><td>C</td><td>0.52235</td><td>-0.24982</td><td>-3.33505</td></tr> <tr><td>C</td><td>0.45616</td><td>0.39502</td><td>-2.11341</td></tr> <tr><td>C</td><td>0.25984</td><td>-1.68403</td><td>-0.96825</td></tr> <tr><td>H</td><td>0.25197</td><td>-3.42042</td><td>-2.22582</td></tr> <tr><td>H</td><td>0.63780</td><td>1.45614</td><td>-2.12340</td></tr> <tr><td>C</td><td>0.10692</td><td>0.55189</td><td>0.35390</td></tr> <tr><td>C</td><td>0.71451</td><td>2.30149</td><td>2.55323</td></tr> <tr><td>C</td><td>0.02490</td><td>1.97534</td><td>0.25798</td></tr> <tr><td>C</td><td>0.20861</td><td>0.10705</td><td>1.69848</td></tr> <tr><td>C</td><td>0.56216</td><td>0.94184</td><td>2.75275</td></tr> <tr><td>C</td><td>0.37333</td><td>2.81503</td><td>1.31290</td></tr> <tr><td>H</td><td>0.67853</td><td>0.50323</td><td>3.73337</td></tr> <tr><td>H</td><td>0.33783</td><td>3.88255</td><td>1.14562</td></tr> <tr><td>H</td><td>0.69492</td><td>0.32547</td><td>-4.23391</td></tr> <tr><td>H</td><td>0.41698</td><td>-2.15851</td><td>-4.32969</td></tr> <tr><td>H</td><td>1.00594</td><td>2.95061</td><td>3.36658</td></tr> <tr><td>C</td><td>-0.59717</td><td>2.71820</td><td>-0.88450</td></tr> <tr><td>O</td><td>-1.76117</td><td>2.15440</td><td>-1.27520</td></tr> <tr><td>O</td><td>-0.19027</td><td>3.75816</td><td>-1.34085</td></tr> <tr><td>N</td><td>-0.27169</td><td>-1.20405</td><td>2.19415</td></tr> <tr><td>O</td><td>-1.43163</td><td>-1.47067</td><td>1.93358</td></tr> <tr><td>O</td><td>0.45547</td><td>-1.85954</td><td>2.92088</td></tr> <tr><td>O</td><td>0.34043</td><td>-2.36720</td><td>0.18131</td></tr> <tr><td>C</td><td>0.24063</td><td>-3.78296</td><td>0.21264</td></tr> <tr><td>H</td><td>1.08278</td><td>-4.24335</td><td>-0.31122</td></tr> <tr><td>H</td><td>-0.69912</td><td>-4.11370</td><td>-0.23635</td></tr> <tr><td>H</td><td>0.26341</td><td>-4.04693</td><td>1.26736</td></tr> <tr><td>H</td><td>-2.12054</td><td>2.70042</td><td>-1.98885</td></tr> </tbody> </table> | C       | 0.38989  | -1.63142 | -3.38514 | C       | 0.22305  | -0.26435 | -0.88930 | C        | 0.28289  | -2.34220 | -2.20228 | C        | 0.52235 | -0.24982 | -3.33505 | C        | 0.45616  | 0.39502 | -2.11341 | C        | 0.25984 | -1.68403 | -0.96825 | H        | 0.25197 | -3.42042 | -2.22582 | H        | 0.63780  | 1.45614 | -2.12340 | C        | 0.10692  | 0.55189 | 0.35390 | C        | 0.71451  | 2.30149 | 2.55323  | C        | 0.02490  | 1.97534                                                                                                                                                                                                                | 0.25798                                                                                                                                                                                                                                                                                                                                                                                                                                                                                                                                                                                                                                                                                                                                                                                                                                                                                                                                                                                                                                                                                                                                                                                                                                                                                                                                                                                                                                                                                                                                                                                                                                                                                                                                                                                                                                                                                                                                                                                                                                                                                                                                                                                                                                                                                                                                                                                                                                                                                                                                                                                                                                                                                                                                                                                                                                                                                                                                                                                                                                                                              | C | 0.20861  | 0.10705  | 1.69848  | C | 0.56216  | 0.94184 | 2.75275  | C | 0.37333  | 2.81503  | 1.31290  | H | 0.67853  | 0.50323 | 3.73337  | H | 0.33783  | 3.88255 | 1.14562  | H | 0.69492  | 0.32547  | -4.23391 | H | 0.41698  | -2.15851 | -4.32969 | H | 1.00594 | 2.95061 | 3.36658  | C | -0.59717 | 2.71820 | -0.88450 | O | -1.76117 | 2.15440 | -1.27520 | O | -0.19027 | 3.75816 | -1.34085 | N | -0.27169 | -1.20405 | 2.19415 | O | -1.43163 | -1.47067 | 1.93358 | O | 0.45547 | -1.85954 | 2.92088 | O | 0.34043  | -2.36720 | 0.18131 | C | 0.24063 | -3.78296 | 0.21264 | H | 1.08278 | -4.24335 | -0.31122 | H | -0.69912 | -4.11370 | -0.23635 | H | 0.26341  | -4.04693 | 1.26736  | H | -2.12054 | 2.70042 | -1.98885 |   |         |          |          |   |         |          |          |   |         |          |          |   |         |          |          |   |         |          |          |   |         |          |          |   |         |          |          |   |         |          |          |   |         |         |          |   |         |         |          |   |         |         |          |   |         |         |          |   |         |         |          |   |          |          |         |   |          |         |         |   |          |         |         |   |          |         |         |   |          |         |         |   |          |          |         |   |          |          |         |   |          |          |         |   |          |          |         |
| C                                                                                                                                                                                                                     | 1.79345                                                                                                                                                                                                                                                                                                                                                                                                                                                                                                                                                                                                                                                                                                                                                                                                                                                                                                                                                                                                                                                                                                                                                                                                                                                                                                                                                                                                                                                                                                                                                                                                                                                                                                                                                                                                                                                                                                                                                                                                                                                                                                                                                                                                                                                                                                                                                                                                                                                                                                                                                                                                                                                                                                                                                                                                                                                                                                                                                                                                                                                                            | 6.41208  | 0.15526  |         |          |   |          |         |          |   |          |          |          |   |          |         |          |   |          |         |          |   |          |          |          |   |          |          |          |   |          |         |          |   |          |         |         |   |          |         |         |   |         |         |         |   |          |         |         |   |          |         |         |   |         |         |         |   |          |         |         |   |          |         |         |   |         |         |         |   |          |         |          |   |          |         |          |   |          |         |         |   |         |         |          |   |         |          |          |   |         |          |          |   |         |          |          |   |         |          |         |   |         |         |         |   |         |         |         |   |          |         |         |   |          |         |         |   |          |         |          |   |          |         |          |                                                                                                                                                                                                                       |                                                                                                                                                                                                                                                                                                                                                                                                                                                                                                                                                                                                                                                                                                                                                                                                                                                                                                                                                                                                                                                                                                                                                                                                                                                                                                                                                                                                                                                                                                                                                                                                                                                                                                                                                                                                                                                                                                                                                                                                                                                                                                                                                                                                                                                                                |         |          |          |          |         |          |          |          |          |          |          |          |          |         |          |          |          |          |         |          |          |         |          |          |          |         |          |          |          |          |         |          |          |          |         |         |          |          |         |          |          |          |                                                                                                                                                                                                                        |                                                                                                                                                                                                                                                                                                                                                                                                                                                                                                                                                                                                                                                                                                                                                                                                                                                                                                                                                                                                                                                                                                                                                                                                                                                                                                                                                                                                                                                                                                                                                                                                                                                                                                                                                                                                                                                                                                                                                                                                                                                                                                                                                                                                                                                                                                                                                                                                                                                                                                                                                                                                                                                                                                                                                                                                                                                                                                                                                                                                                                                                                      |   |          |          |          |   |          |         |          |   |          |          |          |   |          |         |          |   |          |         |          |   |          |          |          |   |          |          |          |   |         |         |          |   |          |         |          |   |          |         |          |   |          |         |          |   |          |          |         |   |          |          |         |   |         |          |         |   |          |          |         |   |         |          |         |   |         |          |          |   |          |          |          |   |          |          |          |   |          |         |          |   |         |          |          |   |         |          |          |   |         |          |          |   |         |          |          |   |         |          |          |   |         |          |          |   |         |          |          |   |         |          |          |   |         |         |          |   |         |         |          |   |         |         |          |   |         |         |          |   |         |         |          |   |          |          |         |   |          |         |         |   |          |         |         |   |          |         |         |   |          |         |         |   |          |          |         |   |          |          |         |   |          |          |         |   |          |          |         |
| C                                                                                                                                                                                                                     | 1.17261                                                                                                                                                                                                                                                                                                                                                                                                                                                                                                                                                                                                                                                                                                                                                                                                                                                                                                                                                                                                                                                                                                                                                                                                                                                                                                                                                                                                                                                                                                                                                                                                                                                                                                                                                                                                                                                                                                                                                                                                                                                                                                                                                                                                                                                                                                                                                                                                                                                                                                                                                                                                                                                                                                                                                                                                                                                                                                                                                                                                                                                                            | 4.19394  | 1.72996  |         |          |   |          |         |          |   |          |          |          |   |          |         |          |   |          |         |          |   |          |          |          |   |          |          |          |   |          |         |          |   |          |         |         |   |          |         |         |   |         |         |         |   |          |         |         |   |          |         |         |   |         |         |         |   |          |         |         |   |          |         |         |   |         |         |         |   |          |         |          |   |          |         |          |   |          |         |         |   |         |         |          |   |         |          |          |   |         |          |          |   |         |          |          |   |         |          |         |   |         |         |         |   |         |         |         |   |          |         |         |   |          |         |         |   |          |         |          |   |          |         |          |                                                                                                                                                                                                                       |                                                                                                                                                                                                                                                                                                                                                                                                                                                                                                                                                                                                                                                                                                                                                                                                                                                                                                                                                                                                                                                                                                                                                                                                                                                                                                                                                                                                                                                                                                                                                                                                                                                                                                                                                                                                                                                                                                                                                                                                                                                                                                                                                                                                                                                                                |         |          |          |          |         |          |          |          |          |          |          |          |          |         |          |          |          |          |         |          |          |         |          |          |          |         |          |          |          |          |         |          |          |          |         |         |          |          |         |          |          |          |                                                                                                                                                                                                                        |                                                                                                                                                                                                                                                                                                                                                                                                                                                                                                                                                                                                                                                                                                                                                                                                                                                                                                                                                                                                                                                                                                                                                                                                                                                                                                                                                                                                                                                                                                                                                                                                                                                                                                                                                                                                                                                                                                                                                                                                                                                                                                                                                                                                                                                                                                                                                                                                                                                                                                                                                                                                                                                                                                                                                                                                                                                                                                                                                                                                                                                                                      |   |          |          |          |   |          |         |          |   |          |          |          |   |          |         |          |   |          |         |          |   |          |          |          |   |          |          |          |   |         |         |          |   |          |         |          |   |          |         |          |   |          |         |          |   |          |          |         |   |          |          |         |   |         |          |         |   |          |          |         |   |         |          |         |   |         |          |          |   |          |          |          |   |          |          |          |   |          |         |          |   |         |          |          |   |         |          |          |   |         |          |          |   |         |          |          |   |         |          |          |   |         |          |          |   |         |          |          |   |         |          |          |   |         |         |          |   |         |         |          |   |         |         |          |   |         |         |          |   |         |         |          |   |          |          |         |   |          |         |         |   |          |         |         |   |          |         |         |   |          |         |         |   |          |          |         |   |          |          |         |   |          |          |         |   |          |          |         |
| C                                                                                                                                                                                                                     | 2.03560                                                                                                                                                                                                                                                                                                                                                                                                                                                                                                                                                                                                                                                                                                                                                                                                                                                                                                                                                                                                                                                                                                                                                                                                                                                                                                                                                                                                                                                                                                                                                                                                                                                                                                                                                                                                                                                                                                                                                                                                                                                                                                                                                                                                                                                                                                                                                                                                                                                                                                                                                                                                                                                                                                                                                                                                                                                                                                                                                                                                                                                                            | 5.12936  | -0.33158 |         |          |   |          |         |          |   |          |          |          |   |          |         |          |   |          |         |          |   |          |          |          |   |          |          |          |   |          |         |          |   |          |         |         |   |          |         |         |   |         |         |         |   |          |         |         |   |          |         |         |   |         |         |         |   |          |         |         |   |          |         |         |   |         |         |         |   |          |         |          |   |          |         |          |   |          |         |         |   |         |         |          |   |         |          |          |   |         |          |          |   |         |          |          |   |         |          |         |   |         |         |         |   |         |         |         |   |          |         |         |   |          |         |         |   |          |         |          |   |          |         |          |                                                                                                                                                                                                                       |                                                                                                                                                                                                                                                                                                                                                                                                                                                                                                                                                                                                                                                                                                                                                                                                                                                                                                                                                                                                                                                                                                                                                                                                                                                                                                                                                                                                                                                                                                                                                                                                                                                                                                                                                                                                                                                                                                                                                                                                                                                                                                                                                                                                                                                                                |         |          |          |          |         |          |          |          |          |          |          |          |          |         |          |          |          |          |         |          |          |         |          |          |          |         |          |          |          |          |         |          |          |          |         |         |          |          |         |          |          |          |                                                                                                                                                                                                                        |                                                                                                                                                                                                                                                                                                                                                                                                                                                                                                                                                                                                                                                                                                                                                                                                                                                                                                                                                                                                                                                                                                                                                                                                                                                                                                                                                                                                                                                                                                                                                                                                                                                                                                                                                                                                                                                                                                                                                                                                                                                                                                                                                                                                                                                                                                                                                                                                                                                                                                                                                                                                                                                                                                                                                                                                                                                                                                                                                                                                                                                                                      |   |          |          |          |   |          |         |          |   |          |          |          |   |          |         |          |   |          |         |          |   |          |          |          |   |          |          |          |   |         |         |          |   |          |         |          |   |          |         |          |   |          |         |          |   |          |          |         |   |          |          |         |   |         |          |         |   |          |          |         |   |         |          |         |   |         |          |          |   |          |          |          |   |          |          |          |   |          |         |          |   |         |          |          |   |         |          |          |   |         |          |          |   |         |          |          |   |         |          |          |   |         |          |          |   |         |          |          |   |         |          |          |   |         |         |          |   |         |         |          |   |         |         |          |   |         |         |          |   |         |         |          |   |          |          |         |   |          |         |         |   |          |         |         |   |          |         |         |   |          |         |         |   |          |          |         |   |          |          |         |   |          |          |         |   |          |          |         |
| C                                                                                                                                                                                                                     | 1.24527                                                                                                                                                                                                                                                                                                                                                                                                                                                                                                                                                                                                                                                                                                                                                                                                                                                                                                                                                                                                                                                                                                                                                                                                                                                                                                                                                                                                                                                                                                                                                                                                                                                                                                                                                                                                                                                                                                                                                                                                                                                                                                                                                                                                                                                                                                                                                                                                                                                                                                                                                                                                                                                                                                                                                                                                                                                                                                                                                                                                                                                                            | 6.59643  | 1.41619  |         |          |   |          |         |          |   |          |          |          |   |          |         |          |   |          |         |          |   |          |          |          |   |          |          |          |   |          |         |          |   |          |         |         |   |          |         |         |   |         |         |         |   |          |         |         |   |          |         |         |   |         |         |         |   |          |         |         |   |          |         |         |   |         |         |         |   |          |         |          |   |          |         |          |   |          |         |         |   |         |         |          |   |         |          |          |   |         |          |          |   |         |          |          |   |         |          |         |   |         |         |         |   |         |         |         |   |          |         |         |   |          |         |         |   |          |         |          |   |          |         |          |                                                                                                                                                                                                                       |                                                                                                                                                                                                                                                                                                                                                                                                                                                                                                                                                                                                                                                                                                                                                                                                                                                                                                                                                                                                                                                                                                                                                                                                                                                                                                                                                                                                                                                                                                                                                                                                                                                                                                                                                                                                                                                                                                                                                                                                                                                                                                                                                                                                                                                                                |         |          |          |          |         |          |          |          |          |          |          |          |          |         |          |          |          |          |         |          |          |         |          |          |          |         |          |          |          |          |         |          |          |          |         |         |          |          |         |          |          |          |                                                                                                                                                                                                                        |                                                                                                                                                                                                                                                                                                                                                                                                                                                                                                                                                                                                                                                                                                                                                                                                                                                                                                                                                                                                                                                                                                                                                                                                                                                                                                                                                                                                                                                                                                                                                                                                                                                                                                                                                                                                                                                                                                                                                                                                                                                                                                                                                                                                                                                                                                                                                                                                                                                                                                                                                                                                                                                                                                                                                                                                                                                                                                                                                                                                                                                                                      |   |          |          |          |   |          |         |          |   |          |          |          |   |          |         |          |   |          |         |          |   |          |          |          |   |          |          |          |   |         |         |          |   |          |         |          |   |          |         |          |   |          |         |          |   |          |          |         |   |          |          |         |   |         |          |         |   |          |          |         |   |         |          |         |   |         |          |          |   |          |          |          |   |          |          |          |   |          |         |          |   |         |          |          |   |         |          |          |   |         |          |          |   |         |          |          |   |         |          |          |   |         |          |          |   |         |          |          |   |         |          |          |   |         |         |          |   |         |         |          |   |         |         |          |   |         |         |          |   |         |         |          |   |          |          |         |   |          |         |         |   |          |         |         |   |          |         |         |   |          |         |         |   |          |          |         |   |          |          |         |   |          |          |         |   |          |          |         |
| C                                                                                                                                                                                                                     | 0.94313                                                                                                                                                                                                                                                                                                                                                                                                                                                                                                                                                                                                                                                                                                                                                                                                                                                                                                                                                                                                                                                                                                                                                                                                                                                                                                                                                                                                                                                                                                                                                                                                                                                                                                                                                                                                                                                                                                                                                                                                                                                                                                                                                                                                                                                                                                                                                                                                                                                                                                                                                                                                                                                                                                                                                                                                                                                                                                                                                                                                                                                                            | 5.48398  | 2.19445  |         |          |   |          |         |          |   |          |          |          |   |          |         |          |   |          |         |          |   |          |          |          |   |          |          |          |   |          |         |          |   |          |         |         |   |          |         |         |   |         |         |         |   |          |         |         |   |          |         |         |   |         |         |         |   |          |         |         |   |          |         |         |   |         |         |         |   |          |         |          |   |          |         |          |   |          |         |         |   |         |         |          |   |         |          |          |   |         |          |          |   |         |          |          |   |         |          |         |   |         |         |         |   |         |         |         |   |          |         |         |   |          |         |         |   |          |         |          |   |          |         |          |                                                                                                                                                                                                                       |                                                                                                                                                                                                                                                                                                                                                                                                                                                                                                                                                                                                                                                                                                                                                                                                                                                                                                                                                                                                                                                                                                                                                                                                                                                                                                                                                                                                                                                                                                                                                                                                                                                                                                                                                                                                                                                                                                                                                                                                                                                                                                                                                                                                                                                                                |         |          |          |          |         |          |          |          |          |          |          |          |          |         |          |          |          |          |         |          |          |         |          |          |          |         |          |          |          |          |         |          |          |          |         |         |          |          |         |          |          |          |                                                                                                                                                                                                                        |                                                                                                                                                                                                                                                                                                                                                                                                                                                                                                                                                                                                                                                                                                                                                                                                                                                                                                                                                                                                                                                                                                                                                                                                                                                                                                                                                                                                                                                                                                                                                                                                                                                                                                                                                                                                                                                                                                                                                                                                                                                                                                                                                                                                                                                                                                                                                                                                                                                                                                                                                                                                                                                                                                                                                                                                                                                                                                                                                                                                                                                                                      |   |          |          |          |   |          |         |          |   |          |          |          |   |          |         |          |   |          |         |          |   |          |          |          |   |          |          |          |   |         |         |          |   |          |         |          |   |          |         |          |   |          |         |          |   |          |          |         |   |          |          |         |   |         |          |         |   |          |          |         |   |         |          |         |   |         |          |          |   |          |          |          |   |          |          |          |   |          |         |          |   |         |          |          |   |         |          |          |   |         |          |          |   |         |          |          |   |         |          |          |   |         |          |          |   |         |          |          |   |         |          |          |   |         |         |          |   |         |         |          |   |         |         |          |   |         |         |          |   |         |         |          |   |          |          |         |   |          |         |         |   |          |         |         |   |          |         |         |   |          |         |         |   |          |          |         |   |          |          |         |   |          |          |         |   |          |          |         |
| C                                                                                                                                                                                                                     | 1.72392                                                                                                                                                                                                                                                                                                                                                                                                                                                                                                                                                                                                                                                                                                                                                                                                                                                                                                                                                                                                                                                                                                                                                                                                                                                                                                                                                                                                                                                                                                                                                                                                                                                                                                                                                                                                                                                                                                                                                                                                                                                                                                                                                                                                                                                                                                                                                                                                                                                                                                                                                                                                                                                                                                                                                                                                                                                                                                                                                                                                                                                                            | 4.01984  | 0.44973  |         |          |   |          |         |          |   |          |          |          |   |          |         |          |   |          |         |          |   |          |          |          |   |          |          |          |   |          |         |          |   |          |         |         |   |          |         |         |   |         |         |         |   |          |         |         |   |          |         |         |   |         |         |         |   |          |         |         |   |          |         |         |   |         |         |         |   |          |         |          |   |          |         |          |   |          |         |         |   |         |         |          |   |         |          |          |   |         |          |          |   |         |          |          |   |         |          |         |   |         |         |         |   |         |         |         |   |          |         |         |   |          |         |         |   |          |         |          |   |          |         |          |                                                                                                                                                                                                                       |                                                                                                                                                                                                                                                                                                                                                                                                                                                                                                                                                                                                                                                                                                                                                                                                                                                                                                                                                                                                                                                                                                                                                                                                                                                                                                                                                                                                                                                                                                                                                                                                                                                                                                                                                                                                                                                                                                                                                                                                                                                                                                                                                                                                                                                                                |         |          |          |          |         |          |          |          |          |          |          |          |          |         |          |          |          |          |         |          |          |         |          |          |          |         |          |          |          |          |         |          |          |          |         |         |          |          |         |          |          |          |                                                                                                                                                                                                                        |                                                                                                                                                                                                                                                                                                                                                                                                                                                                                                                                                                                                                                                                                                                                                                                                                                                                                                                                                                                                                                                                                                                                                                                                                                                                                                                                                                                                                                                                                                                                                                                                                                                                                                                                                                                                                                                                                                                                                                                                                                                                                                                                                                                                                                                                                                                                                                                                                                                                                                                                                                                                                                                                                                                                                                                                                                                                                                                                                                                                                                                                                      |   |          |          |          |   |          |         |          |   |          |          |          |   |          |         |          |   |          |         |          |   |          |          |          |   |          |          |          |   |         |         |          |   |          |         |          |   |          |         |          |   |          |         |          |   |          |          |         |   |          |          |         |   |         |          |         |   |          |          |         |   |         |          |         |   |         |          |          |   |          |          |          |   |          |          |          |   |          |         |          |   |         |          |          |   |         |          |          |   |         |          |          |   |         |          |          |   |         |          |          |   |         |          |          |   |         |          |          |   |         |          |          |   |         |         |          |   |         |         |          |   |         |         |          |   |         |         |          |   |         |         |          |   |          |          |         |   |          |         |         |   |          |         |         |   |          |         |         |   |          |         |         |   |          |          |         |   |          |          |         |   |          |          |         |   |          |          |         |
| H                                                                                                                                                                                                                     | 2.46863                                                                                                                                                                                                                                                                                                                                                                                                                                                                                                                                                                                                                                                                                                                                                                                                                                                                                                                                                                                                                                                                                                                                                                                                                                                                                                                                                                                                                                                                                                                                                                                                                                                                                                                                                                                                                                                                                                                                                                                                                                                                                                                                                                                                                                                                                                                                                                                                                                                                                                                                                                                                                                                                                                                                                                                                                                                                                                                                                                                                                                                                            | 5.00254  | -1.31222 |         |          |   |          |         |          |   |          |          |          |   |          |         |          |   |          |         |          |   |          |          |          |   |          |          |          |   |          |         |          |   |          |         |         |   |          |         |         |   |         |         |         |   |          |         |         |   |          |         |         |   |         |         |         |   |          |         |         |   |          |         |         |   |         |         |         |   |          |         |          |   |          |         |          |   |          |         |         |   |         |         |          |   |         |          |          |   |         |          |          |   |         |          |          |   |         |          |         |   |         |         |         |   |         |         |         |   |          |         |         |   |          |         |         |   |          |         |          |   |          |         |          |                                                                                                                                                                                                                       |                                                                                                                                                                                                                                                                                                                                                                                                                                                                                                                                                                                                                                                                                                                                                                                                                                                                                                                                                                                                                                                                                                                                                                                                                                                                                                                                                                                                                                                                                                                                                                                                                                                                                                                                                                                                                                                                                                                                                                                                                                                                                                                                                                                                                                                                                |         |          |          |          |         |          |          |          |          |          |          |          |          |         |          |          |          |          |         |          |          |         |          |          |          |         |          |          |          |          |         |          |          |          |         |         |          |          |         |          |          |          |                                                                                                                                                                                                                        |                                                                                                                                                                                                                                                                                                                                                                                                                                                                                                                                                                                                                                                                                                                                                                                                                                                                                                                                                                                                                                                                                                                                                                                                                                                                                                                                                                                                                                                                                                                                                                                                                                                                                                                                                                                                                                                                                                                                                                                                                                                                                                                                                                                                                                                                                                                                                                                                                                                                                                                                                                                                                                                                                                                                                                                                                                                                                                                                                                                                                                                                                      |   |          |          |          |   |          |         |          |   |          |          |          |   |          |         |          |   |          |         |          |   |          |          |          |   |          |          |          |   |         |         |          |   |          |         |          |   |          |         |          |   |          |         |          |   |          |          |         |   |          |          |         |   |         |          |         |   |          |          |         |   |         |          |         |   |         |          |          |   |          |          |          |   |          |          |          |   |          |         |          |   |         |          |          |   |         |          |          |   |         |          |          |   |         |          |          |   |         |          |          |   |         |          |          |   |         |          |          |   |         |          |          |   |         |         |          |   |         |         |          |   |         |         |          |   |         |         |          |   |         |         |          |   |          |          |         |   |          |         |         |   |          |         |         |   |          |         |         |   |          |         |         |   |          |          |         |   |          |          |         |   |          |          |         |   |          |          |         |
| H                                                                                                                                                                                                                     | 0.51677                                                                                                                                                                                                                                                                                                                                                                                                                                                                                                                                                                                                                                                                                                                                                                                                                                                                                                                                                                                                                                                                                                                                                                                                                                                                                                                                                                                                                                                                                                                                                                                                                                                                                                                                                                                                                                                                                                                                                                                                                                                                                                                                                                                                                                                                                                                                                                                                                                                                                                                                                                                                                                                                                                                                                                                                                                                                                                                                                                                                                                                                            | 5.61478  | 3.18084  |         |          |   |          |         |          |   |          |          |          |   |          |         |          |   |          |         |          |   |          |          |          |   |          |          |          |   |          |         |          |   |          |         |         |   |          |         |         |   |         |         |         |   |          |         |         |   |          |         |         |   |         |         |         |   |          |         |         |   |          |         |         |   |         |         |         |   |          |         |          |   |          |         |          |   |          |         |         |   |         |         |          |   |         |          |          |   |         |          |          |   |         |          |          |   |         |          |         |   |         |         |         |   |         |         |         |   |          |         |         |   |          |         |         |   |          |         |          |   |          |         |          |                                                                                                                                                                                                                       |                                                                                                                                                                                                                                                                                                                                                                                                                                                                                                                                                                                                                                                                                                                                                                                                                                                                                                                                                                                                                                                                                                                                                                                                                                                                                                                                                                                                                                                                                                                                                                                                                                                                                                                                                                                                                                                                                                                                                                                                                                                                                                                                                                                                                                                                                |         |          |          |          |         |          |          |          |          |          |          |          |          |         |          |          |          |          |         |          |          |         |          |          |          |         |          |          |          |          |         |          |          |          |         |         |          |          |         |          |          |          |                                                                                                                                                                                                                        |                                                                                                                                                                                                                                                                                                                                                                                                                                                                                                                                                                                                                                                                                                                                                                                                                                                                                                                                                                                                                                                                                                                                                                                                                                                                                                                                                                                                                                                                                                                                                                                                                                                                                                                                                                                                                                                                                                                                                                                                                                                                                                                                                                                                                                                                                                                                                                                                                                                                                                                                                                                                                                                                                                                                                                                                                                                                                                                                                                                                                                                                                      |   |          |          |          |   |          |         |          |   |          |          |          |   |          |         |          |   |          |         |          |   |          |          |          |   |          |          |          |   |         |         |          |   |          |         |          |   |          |         |          |   |          |         |          |   |          |          |         |   |          |          |         |   |         |          |         |   |          |          |         |   |         |          |         |   |         |          |          |   |          |          |          |   |          |          |          |   |          |         |          |   |         |          |          |   |         |          |          |   |         |          |          |   |         |          |          |   |         |          |          |   |         |          |          |   |         |          |          |   |         |          |          |   |         |         |          |   |         |         |          |   |         |         |          |   |         |         |          |   |         |         |          |   |          |          |         |   |          |         |         |   |          |         |         |   |          |         |         |   |          |         |         |   |          |          |         |   |          |          |         |   |          |          |         |   |          |          |         |
| C                                                                                                                                                                                                                     | 0.85086                                                                                                                                                                                                                                                                                                                                                                                                                                                                                                                                                                                                                                                                                                                                                                                                                                                                                                                                                                                                                                                                                                                                                                                                                                                                                                                                                                                                                                                                                                                                                                                                                                                                                                                                                                                                                                                                                                                                                                                                                                                                                                                                                                                                                                                                                                                                                                                                                                                                                                                                                                                                                                                                                                                                                                                                                                                                                                                                                                                                                                                                            | 3.02846  | 2.58819  |         |          |   |          |         |          |   |          |          |          |   |          |         |          |   |          |         |          |   |          |          |          |   |          |          |          |   |          |         |          |   |          |         |         |   |          |         |         |   |         |         |         |   |          |         |         |   |          |         |         |   |         |         |         |   |          |         |         |   |          |         |         |   |         |         |         |   |          |         |          |   |          |         |          |   |          |         |         |   |         |         |          |   |         |          |          |   |         |          |          |   |         |          |          |   |         |          |         |   |         |         |         |   |         |         |         |   |          |         |         |   |          |         |         |   |          |         |          |   |          |         |          |                                                                                                                                                                                                                       |                                                                                                                                                                                                                                                                                                                                                                                                                                                                                                                                                                                                                                                                                                                                                                                                                                                                                                                                                                                                                                                                                                                                                                                                                                                                                                                                                                                                                                                                                                                                                                                                                                                                                                                                                                                                                                                                                                                                                                                                                                                                                                                                                                                                                                                                                |         |          |          |          |         |          |          |          |          |          |          |          |          |         |          |          |          |          |         |          |          |         |          |          |          |         |          |          |          |          |         |          |          |          |         |         |          |          |         |          |          |          |                                                                                                                                                                                                                        |                                                                                                                                                                                                                                                                                                                                                                                                                                                                                                                                                                                                                                                                                                                                                                                                                                                                                                                                                                                                                                                                                                                                                                                                                                                                                                                                                                                                                                                                                                                                                                                                                                                                                                                                                                                                                                                                                                                                                                                                                                                                                                                                                                                                                                                                                                                                                                                                                                                                                                                                                                                                                                                                                                                                                                                                                                                                                                                                                                                                                                                                                      |   |          |          |          |   |          |         |          |   |          |          |          |   |          |         |          |   |          |         |          |   |          |          |          |   |          |          |          |   |         |         |          |   |          |         |          |   |          |         |          |   |          |         |          |   |          |          |         |   |          |          |         |   |         |          |         |   |          |          |         |   |         |          |         |   |         |          |          |   |          |          |          |   |          |          |          |   |          |         |          |   |         |          |          |   |         |          |          |   |         |          |          |   |         |          |          |   |         |          |          |   |         |          |          |   |         |          |          |   |         |          |          |   |         |         |          |   |         |         |          |   |         |         |          |   |         |         |          |   |         |         |          |   |          |          |         |   |          |         |         |   |          |         |         |   |          |         |         |   |          |         |         |   |          |          |         |   |          |          |         |   |          |          |         |   |          |          |         |
| C                                                                                                                                                                                                                     | 0.26248                                                                                                                                                                                                                                                                                                                                                                                                                                                                                                                                                                                                                                                                                                                                                                                                                                                                                                                                                                                                                                                                                                                                                                                                                                                                                                                                                                                                                                                                                                                                                                                                                                                                                                                                                                                                                                                                                                                                                                                                                                                                                                                                                                                                                                                                                                                                                                                                                                                                                                                                                                                                                                                                                                                                                                                                                                                                                                                                                                                                                                                                            | 0.86969  | 4.33107  |         |          |   |          |         |          |   |          |          |          |   |          |         |          |   |          |         |          |   |          |          |          |   |          |          |          |   |          |         |          |   |          |         |         |   |          |         |         |   |         |         |         |   |          |         |         |   |          |         |         |   |         |         |         |   |          |         |         |   |          |         |         |   |         |         |         |   |          |         |          |   |          |         |          |   |          |         |         |   |         |         |          |   |         |          |          |   |         |          |          |   |         |          |          |   |         |          |         |   |         |         |         |   |         |         |         |   |          |         |         |   |          |         |         |   |          |         |          |   |          |         |          |                                                                                                                                                                                                                       |                                                                                                                                                                                                                                                                                                                                                                                                                                                                                                                                                                                                                                                                                                                                                                                                                                                                                                                                                                                                                                                                                                                                                                                                                                                                                                                                                                                                                                                                                                                                                                                                                                                                                                                                                                                                                                                                                                                                                                                                                                                                                                                                                                                                                                                                                |         |          |          |          |         |          |          |          |          |          |          |          |          |         |          |          |          |          |         |          |          |         |          |          |          |         |          |          |          |          |         |          |          |          |         |         |          |          |         |          |          |          |                                                                                                                                                                                                                        |                                                                                                                                                                                                                                                                                                                                                                                                                                                                                                                                                                                                                                                                                                                                                                                                                                                                                                                                                                                                                                                                                                                                                                                                                                                                                                                                                                                                                                                                                                                                                                                                                                                                                                                                                                                                                                                                                                                                                                                                                                                                                                                                                                                                                                                                                                                                                                                                                                                                                                                                                                                                                                                                                                                                                                                                                                                                                                                                                                                                                                                                                      |   |          |          |          |   |          |         |          |   |          |          |          |   |          |         |          |   |          |         |          |   |          |          |          |   |          |          |          |   |         |         |          |   |          |         |          |   |          |         |          |   |          |         |          |   |          |          |         |   |          |          |         |   |         |          |         |   |          |          |         |   |         |          |         |   |         |          |          |   |          |          |          |   |          |          |          |   |          |         |          |   |         |          |          |   |         |          |          |   |         |          |          |   |         |          |          |   |         |          |          |   |         |          |          |   |         |          |          |   |         |          |          |   |         |         |          |   |         |         |          |   |         |         |          |   |         |         |          |   |         |         |          |   |          |          |         |   |          |         |         |   |          |         |         |   |          |         |         |   |          |         |         |   |          |          |         |   |          |          |         |   |          |          |         |   |          |          |         |
| C                                                                                                                                                                                                                     | 1.41050                                                                                                                                                                                                                                                                                                                                                                                                                                                                                                                                                                                                                                                                                                                                                                                                                                                                                                                                                                                                                                                                                                                                                                                                                                                                                                                                                                                                                                                                                                                                                                                                                                                                                                                                                                                                                                                                                                                                                                                                                                                                                                                                                                                                                                                                                                                                                                                                                                                                                                                                                                                                                                                                                                                                                                                                                                                                                                                                                                                                                                                                            | 2.91036  | 3.86356  |         |          |   |          |         |          |   |          |          |          |   |          |         |          |   |          |         |          |   |          |          |          |   |          |          |          |   |          |         |          |   |          |         |         |   |          |         |         |   |         |         |         |   |          |         |         |   |          |         |         |   |         |         |         |   |          |         |         |   |          |         |         |   |         |         |         |   |          |         |          |   |          |         |          |   |          |         |         |   |         |         |          |   |         |          |          |   |         |          |          |   |         |          |          |   |         |          |         |   |         |         |         |   |         |         |         |   |          |         |         |   |          |         |         |   |          |         |          |   |          |         |          |                                                                                                                                                                                                                       |                                                                                                                                                                                                                                                                                                                                                                                                                                                                                                                                                                                                                                                                                                                                                                                                                                                                                                                                                                                                                                                                                                                                                                                                                                                                                                                                                                                                                                                                                                                                                                                                                                                                                                                                                                                                                                                                                                                                                                                                                                                                                                                                                                                                                                                                                |         |          |          |          |         |          |          |          |          |          |          |          |          |         |          |          |          |          |         |          |          |         |          |          |          |         |          |          |          |          |         |          |          |          |         |         |          |          |         |          |          |          |                                                                                                                                                                                                                        |                                                                                                                                                                                                                                                                                                                                                                                                                                                                                                                                                                                                                                                                                                                                                                                                                                                                                                                                                                                                                                                                                                                                                                                                                                                                                                                                                                                                                                                                                                                                                                                                                                                                                                                                                                                                                                                                                                                                                                                                                                                                                                                                                                                                                                                                                                                                                                                                                                                                                                                                                                                                                                                                                                                                                                                                                                                                                                                                                                                                                                                                                      |   |          |          |          |   |          |         |          |   |          |          |          |   |          |         |          |   |          |         |          |   |          |          |          |   |          |          |          |   |         |         |          |   |          |         |          |   |          |         |          |   |          |         |          |   |          |          |         |   |          |          |         |   |         |          |         |   |          |          |         |   |         |          |         |   |         |          |          |   |          |          |          |   |          |          |          |   |          |         |          |   |         |          |          |   |         |          |          |   |         |          |          |   |         |          |          |   |         |          |          |   |         |          |          |   |         |          |          |   |         |          |          |   |         |         |          |   |         |         |          |   |         |         |          |   |         |         |          |   |         |         |          |   |          |          |         |   |          |         |         |   |          |         |         |   |          |         |         |   |          |         |         |   |          |          |         |   |          |          |         |   |          |          |         |   |          |          |         |
| C                                                                                                                                                                                                                     | -0.02780                                                                                                                                                                                                                                                                                                                                                                                                                                                                                                                                                                                                                                                                                                                                                                                                                                                                                                                                                                                                                                                                                                                                                                                                                                                                                                                                                                                                                                                                                                                                                                                                                                                                                                                                                                                                                                                                                                                                                                                                                                                                                                                                                                                                                                                                                                                                                                                                                                                                                                                                                                                                                                                                                                                                                                                                                                                                                                                                                                                                                                                                           | 1.99648  | 2.20515  |         |          |   |          |         |          |   |          |          |          |   |          |         |          |   |          |         |          |   |          |          |          |   |          |          |          |   |          |         |          |   |          |         |         |   |          |         |         |   |         |         |         |   |          |         |         |   |          |         |         |   |         |         |         |   |          |         |         |   |          |         |         |   |         |         |         |   |          |         |          |   |          |         |          |   |          |         |         |   |         |         |          |   |         |          |          |   |         |          |          |   |         |          |          |   |         |          |         |   |         |         |         |   |         |         |         |   |          |         |         |   |          |         |         |   |          |         |          |   |          |         |          |                                                                                                                                                                                                                       |                                                                                                                                                                                                                                                                                                                                                                                                                                                                                                                                                                                                                                                                                                                                                                                                                                                                                                                                                                                                                                                                                                                                                                                                                                                                                                                                                                                                                                                                                                                                                                                                                                                                                                                                                                                                                                                                                                                                                                                                                                                                                                                                                                                                                                                                                |         |          |          |          |         |          |          |          |          |          |          |          |          |         |          |          |          |          |         |          |          |         |          |          |          |         |          |          |          |          |         |          |          |          |         |         |          |          |         |          |          |          |                                                                                                                                                                                                                        |                                                                                                                                                                                                                                                                                                                                                                                                                                                                                                                                                                                                                                                                                                                                                                                                                                                                                                                                                                                                                                                                                                                                                                                                                                                                                                                                                                                                                                                                                                                                                                                                                                                                                                                                                                                                                                                                                                                                                                                                                                                                                                                                                                                                                                                                                                                                                                                                                                                                                                                                                                                                                                                                                                                                                                                                                                                                                                                                                                                                                                                                                      |   |          |          |          |   |          |         |          |   |          |          |          |   |          |         |          |   |          |         |          |   |          |          |          |   |          |          |          |   |         |         |          |   |          |         |          |   |          |         |          |   |          |         |          |   |          |          |         |   |          |          |         |   |         |          |         |   |          |          |         |   |         |          |         |   |         |          |          |   |          |          |          |   |          |          |          |   |          |         |          |   |         |          |          |   |         |          |          |   |         |          |          |   |         |          |          |   |         |          |          |   |         |          |          |   |         |          |          |   |         |          |          |   |         |         |          |   |         |         |          |   |         |         |          |   |         |         |          |   |         |         |          |   |          |          |         |   |          |         |         |   |          |         |         |   |          |         |         |   |          |         |         |   |          |          |         |   |          |          |         |   |          |          |         |   |          |          |         |
| C                                                                                                                                                                                                                     | -0.28725                                                                                                                                                                                                                                                                                                                                                                                                                                                                                                                                                                                                                                                                                                                                                                                                                                                                                                                                                                                                                                                                                                                                                                                                                                                                                                                                                                                                                                                                                                                                                                                                                                                                                                                                                                                                                                                                                                                                                                                                                                                                                                                                                                                                                                                                                                                                                                                                                                                                                                                                                                                                                                                                                                                                                                                                                                                                                                                                                                                                                                                                           | 0.92349  | 3.05836  |         |          |   |          |         |          |   |          |          |          |   |          |         |          |   |          |         |          |   |          |          |          |   |          |          |          |   |          |         |          |   |          |         |         |   |          |         |         |   |         |         |         |   |          |         |         |   |          |         |         |   |         |         |         |   |          |         |         |   |          |         |         |   |         |         |         |   |          |         |          |   |          |         |          |   |          |         |         |   |         |         |          |   |         |          |          |   |         |          |          |   |         |          |          |   |         |          |         |   |         |         |         |   |         |         |         |   |          |         |         |   |          |         |         |   |          |         |          |   |          |         |          |                                                                                                                                                                                                                       |                                                                                                                                                                                                                                                                                                                                                                                                                                                                                                                                                                                                                                                                                                                                                                                                                                                                                                                                                                                                                                                                                                                                                                                                                                                                                                                                                                                                                                                                                                                                                                                                                                                                                                                                                                                                                                                                                                                                                                                                                                                                                                                                                                                                                                                                                |         |          |          |          |         |          |          |          |          |          |          |          |          |         |          |          |          |          |         |          |          |         |          |          |          |         |          |          |          |          |         |          |          |          |         |         |          |          |         |          |          |          |                                                                                                                                                                                                                        |                                                                                                                                                                                                                                                                                                                                                                                                                                                                                                                                                                                                                                                                                                                                                                                                                                                                                                                                                                                                                                                                                                                                                                                                                                                                                                                                                                                                                                                                                                                                                                                                                                                                                                                                                                                                                                                                                                                                                                                                                                                                                                                                                                                                                                                                                                                                                                                                                                                                                                                                                                                                                                                                                                                                                                                                                                                                                                                                                                                                                                                                                      |   |          |          |          |   |          |         |          |   |          |          |          |   |          |         |          |   |          |         |          |   |          |          |          |   |          |          |          |   |         |         |          |   |          |         |          |   |          |         |          |   |          |         |          |   |          |          |         |   |          |          |         |   |         |          |         |   |          |          |         |   |         |          |         |   |         |          |          |   |          |          |          |   |          |          |          |   |          |         |          |   |         |          |          |   |         |          |          |   |         |          |          |   |         |          |          |   |         |          |          |   |         |          |          |   |         |          |          |   |         |          |          |   |         |         |          |   |         |         |          |   |         |         |          |   |         |         |          |   |         |         |          |   |          |          |         |   |          |         |         |   |          |         |         |   |          |         |         |   |          |         |         |   |          |          |         |   |          |          |         |   |          |          |         |   |          |          |         |
| C                                                                                                                                                                                                                     | 1.11122                                                                                                                                                                                                                                                                                                                                                                                                                                                                                                                                                                                                                                                                                                                                                                                                                                                                                                                                                                                                                                                                                                                                                                                                                                                                                                                                                                                                                                                                                                                                                                                                                                                                                                                                                                                                                                                                                                                                                                                                                                                                                                                                                                                                                                                                                                                                                                                                                                                                                                                                                                                                                                                                                                                                                                                                                                                                                                                                                                                                                                                                            | 1.88336  | 4.74627  |         |          |   |          |         |          |   |          |          |          |   |          |         |          |   |          |         |          |   |          |          |          |   |          |          |          |   |          |         |          |   |          |         |         |   |          |         |         |   |         |         |         |   |          |         |         |   |          |         |         |   |         |         |         |   |          |         |         |   |          |         |         |   |         |         |         |   |          |         |          |   |          |         |          |   |          |         |         |   |         |         |          |   |         |          |          |   |         |          |          |   |         |          |          |   |         |          |         |   |         |         |         |   |         |         |         |   |          |         |         |   |          |         |         |   |          |         |          |   |          |         |          |                                                                                                                                                                                                                       |                                                                                                                                                                                                                                                                                                                                                                                                                                                                                                                                                                                                                                                                                                                                                                                                                                                                                                                                                                                                                                                                                                                                                                                                                                                                                                                                                                                                                                                                                                                                                                                                                                                                                                                                                                                                                                                                                                                                                                                                                                                                                                                                                                                                                                                                                |         |          |          |          |         |          |          |          |          |          |          |          |          |         |          |          |          |          |         |          |          |         |          |          |          |         |          |          |          |          |         |          |          |          |         |         |          |          |         |          |          |          |                                                                                                                                                                                                                        |                                                                                                                                                                                                                                                                                                                                                                                                                                                                                                                                                                                                                                                                                                                                                                                                                                                                                                                                                                                                                                                                                                                                                                                                                                                                                                                                                                                                                                                                                                                                                                                                                                                                                                                                                                                                                                                                                                                                                                                                                                                                                                                                                                                                                                                                                                                                                                                                                                                                                                                                                                                                                                                                                                                                                                                                                                                                                                                                                                                                                                                                                      |   |          |          |          |   |          |         |          |   |          |          |          |   |          |         |          |   |          |         |          |   |          |          |          |   |          |          |          |   |         |         |          |   |          |         |          |   |          |         |          |   |          |         |          |   |          |          |         |   |          |          |         |   |         |          |         |   |          |          |         |   |         |          |         |   |         |          |          |   |          |          |          |   |          |          |          |   |          |         |          |   |         |          |          |   |         |          |          |   |         |          |          |   |         |          |          |   |         |          |          |   |         |          |          |   |         |          |          |   |         |          |          |   |         |         |          |   |         |         |          |   |         |         |          |   |         |         |          |   |         |         |          |   |          |          |         |   |          |         |         |   |          |         |         |   |          |         |         |   |          |         |         |   |          |          |         |   |          |          |         |   |          |          |         |   |          |          |         |
| H                                                                                                                                                                                                                     | -0.94265                                                                                                                                                                                                                                                                                                                                                                                                                                                                                                                                                                                                                                                                                                                                                                                                                                                                                                                                                                                                                                                                                                                                                                                                                                                                                                                                                                                                                                                                                                                                                                                                                                                                                                                                                                                                                                                                                                                                                                                                                                                                                                                                                                                                                                                                                                                                                                                                                                                                                                                                                                                                                                                                                                                                                                                                                                                                                                                                                                                                                                                                           | 0.13870  | 2.70767  |         |          |   |          |         |          |   |          |          |          |   |          |         |          |   |          |         |          |   |          |          |          |   |          |          |          |   |          |         |          |   |          |         |         |   |          |         |         |   |         |         |         |   |          |         |         |   |          |         |         |   |         |         |         |   |          |         |         |   |          |         |         |   |         |         |         |   |          |         |          |   |          |         |          |   |          |         |         |   |         |         |          |   |         |          |          |   |         |          |          |   |         |          |          |   |         |          |         |   |         |         |         |   |         |         |         |   |          |         |         |   |          |         |         |   |          |         |          |   |          |         |          |                                                                                                                                                                                                                       |                                                                                                                                                                                                                                                                                                                                                                                                                                                                                                                                                                                                                                                                                                                                                                                                                                                                                                                                                                                                                                                                                                                                                                                                                                                                                                                                                                                                                                                                                                                                                                                                                                                                                                                                                                                                                                                                                                                                                                                                                                                                                                                                                                                                                                                                                |         |          |          |          |         |          |          |          |          |          |          |          |          |         |          |          |          |          |         |          |          |         |          |          |          |         |          |          |          |          |         |          |          |          |         |         |          |          |         |          |          |          |                                                                                                                                                                                                                        |                                                                                                                                                                                                                                                                                                                                                                                                                                                                                                                                                                                                                                                                                                                                                                                                                                                                                                                                                                                                                                                                                                                                                                                                                                                                                                                                                                                                                                                                                                                                                                                                                                                                                                                                                                                                                                                                                                                                                                                                                                                                                                                                                                                                                                                                                                                                                                                                                                                                                                                                                                                                                                                                                                                                                                                                                                                                                                                                                                                                                                                                                      |   |          |          |          |   |          |         |          |   |          |          |          |   |          |         |          |   |          |         |          |   |          |          |          |   |          |          |          |   |         |         |          |   |          |         |          |   |          |         |          |   |          |         |          |   |          |          |         |   |          |          |         |   |         |          |         |   |          |          |         |   |         |          |         |   |         |          |          |   |          |          |          |   |          |          |          |   |          |         |          |   |         |          |          |   |         |          |          |   |         |          |          |   |         |          |          |   |         |          |          |   |         |          |          |   |         |          |          |   |         |          |          |   |         |         |          |   |         |         |          |   |         |         |          |   |         |         |          |   |         |         |          |   |          |          |         |   |          |         |         |   |          |         |         |   |          |         |         |   |          |         |         |   |          |          |         |   |          |          |         |   |          |          |         |   |          |          |         |
| H                                                                                                                                                                                                                     | 1.56182                                                                                                                                                                                                                                                                                                                                                                                                                                                                                                                                                                                                                                                                                                                                                                                                                                                                                                                                                                                                                                                                                                                                                                                                                                                                                                                                                                                                                                                                                                                                                                                                                                                                                                                                                                                                                                                                                                                                                                                                                                                                                                                                                                                                                                                                                                                                                                                                                                                                                                                                                                                                                                                                                                                                                                                                                                                                                                                                                                                                                                                                            | 1.88222  | 5.72839  |         |          |   |          |         |          |   |          |          |          |   |          |         |          |   |          |         |          |   |          |          |          |   |          |          |          |   |          |         |          |   |          |         |         |   |          |         |         |   |         |         |         |   |          |         |         |   |          |         |         |   |         |         |         |   |          |         |         |   |          |         |         |   |         |         |         |   |          |         |          |   |          |         |          |   |          |         |         |   |         |         |          |   |         |          |          |   |         |          |          |   |         |          |          |   |         |          |         |   |         |         |         |   |         |         |         |   |          |         |         |   |          |         |         |   |          |         |          |   |          |         |          |                                                                                                                                                                                                                       |                                                                                                                                                                                                                                                                                                                                                                                                                                                                                                                                                                                                                                                                                                                                                                                                                                                                                                                                                                                                                                                                                                                                                                                                                                                                                                                                                                                                                                                                                                                                                                                                                                                                                                                                                                                                                                                                                                                                                                                                                                                                                                                                                                                                                                                                                |         |          |          |          |         |          |          |          |          |          |          |          |          |         |          |          |          |          |         |          |          |         |          |          |          |         |          |          |          |          |         |          |          |          |         |         |          |          |         |          |          |          |                                                                                                                                                                                                                        |                                                                                                                                                                                                                                                                                                                                                                                                                                                                                                                                                                                                                                                                                                                                                                                                                                                                                                                                                                                                                                                                                                                                                                                                                                                                                                                                                                                                                                                                                                                                                                                                                                                                                                                                                                                                                                                                                                                                                                                                                                                                                                                                                                                                                                                                                                                                                                                                                                                                                                                                                                                                                                                                                                                                                                                                                                                                                                                                                                                                                                                                                      |   |          |          |          |   |          |         |          |   |          |          |          |   |          |         |          |   |          |         |          |   |          |          |          |   |          |          |          |   |         |         |          |   |          |         |          |   |          |         |          |   |          |         |          |   |          |          |         |   |          |          |         |   |         |          |         |   |          |          |         |   |         |          |         |   |         |          |          |   |          |          |          |   |          |          |          |   |          |         |          |   |         |          |          |   |         |          |          |   |         |          |          |   |         |          |          |   |         |          |          |   |         |          |          |   |         |          |          |   |         |          |          |   |         |         |          |   |         |         |          |   |         |         |          |   |         |         |          |   |         |         |          |   |          |          |         |   |          |         |         |   |          |         |         |   |          |         |         |   |          |         |         |   |          |          |         |   |          |          |         |   |          |          |         |   |          |          |         |
| H                                                                                                                                                                                                                     | 1.05631                                                                                                                                                                                                                                                                                                                                                                                                                                                                                                                                                                                                                                                                                                                                                                                                                                                                                                                                                                                                                                                                                                                                                                                                                                                                                                                                                                                                                                                                                                                                                                                                                                                                                                                                                                                                                                                                                                                                                                                                                                                                                                                                                                                                                                                                                                                                                                                                                                                                                                                                                                                                                                                                                                                                                                                                                                                                                                                                                                                                                                                                            | 7.59115  | 1.79509  |         |          |   |          |         |          |   |          |          |          |   |          |         |          |   |          |         |          |   |          |          |          |   |          |          |          |   |          |         |          |   |          |         |         |   |          |         |         |   |         |         |         |   |          |         |         |   |          |         |         |   |         |         |         |   |          |         |         |   |          |         |         |   |         |         |         |   |          |         |          |   |          |         |          |   |          |         |         |   |         |         |          |   |         |          |          |   |         |          |          |   |         |          |          |   |         |          |         |   |         |         |         |   |         |         |         |   |          |         |         |   |          |         |         |   |          |         |          |   |          |         |          |                                                                                                                                                                                                                       |                                                                                                                                                                                                                                                                                                                                                                                                                                                                                                                                                                                                                                                                                                                                                                                                                                                                                                                                                                                                                                                                                                                                                                                                                                                                                                                                                                                                                                                                                                                                                                                                                                                                                                                                                                                                                                                                                                                                                                                                                                                                                                                                                                                                                                                                                |         |          |          |          |         |          |          |          |          |          |          |          |          |         |          |          |          |          |         |          |          |         |          |          |          |         |          |          |          |          |         |          |          |          |         |         |          |          |         |          |          |          |                                                                                                                                                                                                                        |                                                                                                                                                                                                                                                                                                                                                                                                                                                                                                                                                                                                                                                                                                                                                                                                                                                                                                                                                                                                                                                                                                                                                                                                                                                                                                                                                                                                                                                                                                                                                                                                                                                                                                                                                                                                                                                                                                                                                                                                                                                                                                                                                                                                                                                                                                                                                                                                                                                                                                                                                                                                                                                                                                                                                                                                                                                                                                                                                                                                                                                                                      |   |          |          |          |   |          |         |          |   |          |          |          |   |          |         |          |   |          |         |          |   |          |          |          |   |          |          |          |   |         |         |          |   |          |         |          |   |          |         |          |   |          |         |          |   |          |          |         |   |          |          |         |   |         |          |         |   |          |          |         |   |         |          |         |   |         |          |          |   |          |          |          |   |          |          |          |   |          |         |          |   |         |          |          |   |         |          |          |   |         |          |          |   |         |          |          |   |         |          |          |   |         |          |          |   |         |          |          |   |         |          |          |   |         |         |          |   |         |         |          |   |         |         |          |   |         |         |          |   |         |         |          |   |          |          |         |   |          |         |         |   |          |         |         |   |          |         |         |   |          |         |         |   |          |          |         |   |          |          |         |   |          |          |         |   |          |          |         |
| H                                                                                                                                                                                                                     | 2.04034                                                                                                                                                                                                                                                                                                                                                                                                                                                                                                                                                                                                                                                                                                                                                                                                                                                                                                                                                                                                                                                                                                                                                                                                                                                                                                                                                                                                                                                                                                                                                                                                                                                                                                                                                                                                                                                                                                                                                                                                                                                                                                                                                                                                                                                                                                                                                                                                                                                                                                                                                                                                                                                                                                                                                                                                                                                                                                                                                                                                                                                                            | 7.26616  | -0.46172 |         |          |   |          |         |          |   |          |          |          |   |          |         |          |   |          |         |          |   |          |          |          |   |          |          |          |   |          |         |          |   |          |         |         |   |          |         |         |   |         |         |         |   |          |         |         |   |          |         |         |   |         |         |         |   |          |         |         |   |          |         |         |   |         |         |         |   |          |         |          |   |          |         |          |   |          |         |         |   |         |         |          |   |         |          |          |   |         |          |          |   |         |          |          |   |         |          |         |   |         |         |         |   |         |         |         |   |          |         |         |   |          |         |         |   |          |         |          |   |          |         |          |                                                                                                                                                                                                                       |                                                                                                                                                                                                                                                                                                                                                                                                                                                                                                                                                                                                                                                                                                                                                                                                                                                                                                                                                                                                                                                                                                                                                                                                                                                                                                                                                                                                                                                                                                                                                                                                                                                                                                                                                                                                                                                                                                                                                                                                                                                                                                                                                                                                                                                                                |         |          |          |          |         |          |          |          |          |          |          |          |          |         |          |          |          |          |         |          |          |         |          |          |          |         |          |          |          |          |         |          |          |          |         |         |          |          |         |          |          |          |                                                                                                                                                                                                                        |                                                                                                                                                                                                                                                                                                                                                                                                                                                                                                                                                                                                                                                                                                                                                                                                                                                                                                                                                                                                                                                                                                                                                                                                                                                                                                                                                                                                                                                                                                                                                                                                                                                                                                                                                                                                                                                                                                                                                                                                                                                                                                                                                                                                                                                                                                                                                                                                                                                                                                                                                                                                                                                                                                                                                                                                                                                                                                                                                                                                                                                                                      |   |          |          |          |   |          |         |          |   |          |          |          |   |          |         |          |   |          |         |          |   |          |          |          |   |          |          |          |   |         |         |          |   |          |         |          |   |          |         |          |   |          |         |          |   |          |          |         |   |          |          |         |   |         |          |         |   |          |          |         |   |         |          |         |   |         |          |          |   |          |          |          |   |          |          |          |   |          |         |          |   |         |          |          |   |         |          |          |   |         |          |          |   |         |          |          |   |         |          |          |   |         |          |          |   |         |          |          |   |         |          |          |   |         |         |          |   |         |         |          |   |         |         |          |   |         |         |          |   |         |         |          |   |          |          |         |   |          |         |         |   |          |         |         |   |          |         |         |   |          |         |         |   |          |          |         |   |          |          |         |   |          |          |         |   |          |          |         |
| H                                                                                                                                                                                                                     | 0.03555                                                                                                                                                                                                                                                                                                                                                                                                                                                                                                                                                                                                                                                                                                                                                                                                                                                                                                                                                                                                                                                                                                                                                                                                                                                                                                                                                                                                                                                                                                                                                                                                                                                                                                                                                                                                                                                                                                                                                                                                                                                                                                                                                                                                                                                                                                                                                                                                                                                                                                                                                                                                                                                                                                                                                                                                                                                                                                                                                                                                                                                                            | 0.04459  | 4.99161  |         |          |   |          |         |          |   |          |          |          |   |          |         |          |   |          |         |          |   |          |          |          |   |          |          |          |   |          |         |          |   |          |         |         |   |          |         |         |   |         |         |         |   |          |         |         |   |          |         |         |   |         |         |         |   |          |         |         |   |          |         |         |   |         |         |         |   |          |         |          |   |          |         |          |   |          |         |         |   |         |         |          |   |         |          |          |   |         |          |          |   |         |          |          |   |         |          |         |   |         |         |         |   |         |         |         |   |          |         |         |   |          |         |         |   |          |         |          |   |          |         |          |                                                                                                                                                                                                                       |                                                                                                                                                                                                                                                                                                                                                                                                                                                                                                                                                                                                                                                                                                                                                                                                                                                                                                                                                                                                                                                                                                                                                                                                                                                                                                                                                                                                                                                                                                                                                                                                                                                                                                                                                                                                                                                                                                                                                                                                                                                                                                                                                                                                                                                                                |         |          |          |          |         |          |          |          |          |          |          |          |          |         |          |          |          |          |         |          |          |         |          |          |          |         |          |          |          |          |         |          |          |          |         |         |          |          |         |          |          |          |                                                                                                                                                                                                                        |                                                                                                                                                                                                                                                                                                                                                                                                                                                                                                                                                                                                                                                                                                                                                                                                                                                                                                                                                                                                                                                                                                                                                                                                                                                                                                                                                                                                                                                                                                                                                                                                                                                                                                                                                                                                                                                                                                                                                                                                                                                                                                                                                                                                                                                                                                                                                                                                                                                                                                                                                                                                                                                                                                                                                                                                                                                                                                                                                                                                                                                                                      |   |          |          |          |   |          |         |          |   |          |          |          |   |          |         |          |   |          |         |          |   |          |          |          |   |          |          |          |   |         |         |          |   |          |         |          |   |          |         |          |   |          |         |          |   |          |          |         |   |          |          |         |   |         |          |         |   |          |          |         |   |         |          |         |   |         |          |          |   |          |          |          |   |          |          |          |   |          |         |          |   |         |          |          |   |         |          |          |   |         |          |          |   |         |          |          |   |         |          |          |   |         |          |          |   |         |          |          |   |         |          |          |   |         |         |          |   |         |         |          |   |         |         |          |   |         |         |          |   |         |         |          |   |          |          |         |   |          |         |         |   |          |         |         |   |          |         |         |   |          |         |         |   |          |          |         |   |          |          |         |   |          |          |         |   |          |          |         |
| O                                                                                                                                                                                                                     | 1.91722                                                                                                                                                                                                                                                                                                                                                                                                                                                                                                                                                                                                                                                                                                                                                                                                                                                                                                                                                                                                                                                                                                                                                                                                                                                                                                                                                                                                                                                                                                                                                                                                                                                                                                                                                                                                                                                                                                                                                                                                                                                                                                                                                                                                                                                                                                                                                                                                                                                                                                                                                                                                                                                                                                                                                                                                                                                                                                                                                                                                                                                                            | 2.73420  | 0.05451  |         |          |   |          |         |          |   |          |          |          |   |          |         |          |   |          |         |          |   |          |          |          |   |          |          |          |   |          |         |          |   |          |         |         |   |          |         |         |   |         |         |         |   |          |         |         |   |          |         |         |   |         |         |         |   |          |         |         |   |          |         |         |   |         |         |         |   |          |         |          |   |          |         |          |   |          |         |         |   |         |         |          |   |         |          |          |   |         |          |          |   |         |          |          |   |         |          |         |   |         |         |         |   |         |         |         |   |          |         |         |   |          |         |         |   |          |         |          |   |          |         |          |                                                                                                                                                                                                                       |                                                                                                                                                                                                                                                                                                                                                                                                                                                                                                                                                                                                                                                                                                                                                                                                                                                                                                                                                                                                                                                                                                                                                                                                                                                                                                                                                                                                                                                                                                                                                                                                                                                                                                                                                                                                                                                                                                                                                                                                                                                                                                                                                                                                                                                                                |         |          |          |          |         |          |          |          |          |          |          |          |          |         |          |          |          |          |         |          |          |         |          |          |          |         |          |          |          |          |         |          |          |          |         |         |          |          |         |          |          |          |                                                                                                                                                                                                                        |                                                                                                                                                                                                                                                                                                                                                                                                                                                                                                                                                                                                                                                                                                                                                                                                                                                                                                                                                                                                                                                                                                                                                                                                                                                                                                                                                                                                                                                                                                                                                                                                                                                                                                                                                                                                                                                                                                                                                                                                                                                                                                                                                                                                                                                                                                                                                                                                                                                                                                                                                                                                                                                                                                                                                                                                                                                                                                                                                                                                                                                                                      |   |          |          |          |   |          |         |          |   |          |          |          |   |          |         |          |   |          |         |          |   |          |          |          |   |          |          |          |   |         |         |          |   |          |         |          |   |          |         |          |   |          |         |          |   |          |          |         |   |          |          |         |   |         |          |         |   |          |          |         |   |         |          |         |   |         |          |          |   |          |          |          |   |          |          |          |   |          |         |          |   |         |          |          |   |         |          |          |   |         |          |          |   |         |          |          |   |         |          |          |   |         |          |          |   |         |          |          |   |         |          |          |   |         |         |          |   |         |         |          |   |         |         |          |   |         |         |          |   |         |         |          |   |          |          |         |   |          |         |         |   |          |         |         |   |          |         |         |   |          |         |         |   |          |          |         |   |          |          |         |   |          |          |         |   |          |          |         |
| C                                                                                                                                                                                                                     | 2.43543                                                                                                                                                                                                                                                                                                                                                                                                                                                                                                                                                                                                                                                                                                                                                                                                                                                                                                                                                                                                                                                                                                                                                                                                                                                                                                                                                                                                                                                                                                                                                                                                                                                                                                                                                                                                                                                                                                                                                                                                                                                                                                                                                                                                                                                                                                                                                                                                                                                                                                                                                                                                                                                                                                                                                                                                                                                                                                                                                                                                                                                                            | 2.49476  | -1.24476 |         |          |   |          |         |          |   |          |          |          |   |          |         |          |   |          |         |          |   |          |          |          |   |          |          |          |   |          |         |          |   |          |         |         |   |          |         |         |   |         |         |         |   |          |         |         |   |          |         |         |   |         |         |         |   |          |         |         |   |          |         |         |   |         |         |         |   |          |         |          |   |          |         |          |   |          |         |         |   |         |         |          |   |         |          |          |   |         |          |          |   |         |          |          |   |         |          |         |   |         |         |         |   |         |         |         |   |          |         |         |   |          |         |         |   |          |         |          |   |          |         |          |                                                                                                                                                                                                                       |                                                                                                                                                                                                                                                                                                                                                                                                                                                                                                                                                                                                                                                                                                                                                                                                                                                                                                                                                                                                                                                                                                                                                                                                                                                                                                                                                                                                                                                                                                                                                                                                                                                                                                                                                                                                                                                                                                                                                                                                                                                                                                                                                                                                                                                                                |         |          |          |          |         |          |          |          |          |          |          |          |          |         |          |          |          |          |         |          |          |         |          |          |          |         |          |          |          |          |         |          |          |          |         |         |          |          |         |          |          |          |                                                                                                                                                                                                                        |                                                                                                                                                                                                                                                                                                                                                                                                                                                                                                                                                                                                                                                                                                                                                                                                                                                                                                                                                                                                                                                                                                                                                                                                                                                                                                                                                                                                                                                                                                                                                                                                                                                                                                                                                                                                                                                                                                                                                                                                                                                                                                                                                                                                                                                                                                                                                                                                                                                                                                                                                                                                                                                                                                                                                                                                                                                                                                                                                                                                                                                                                      |   |          |          |          |   |          |         |          |   |          |          |          |   |          |         |          |   |          |         |          |   |          |          |          |   |          |          |          |   |         |         |          |   |          |         |          |   |          |         |          |   |          |         |          |   |          |          |         |   |          |          |         |   |         |          |         |   |          |          |         |   |         |          |         |   |         |          |          |   |          |          |          |   |          |          |          |   |          |         |          |   |         |          |          |   |         |          |          |   |         |          |          |   |         |          |          |   |         |          |          |   |         |          |          |   |         |          |          |   |         |          |          |   |         |         |          |   |         |         |          |   |         |         |          |   |         |         |          |   |         |         |          |   |          |          |         |   |          |         |         |   |          |         |         |   |          |         |         |   |          |         |         |   |          |          |         |   |          |          |         |   |          |          |         |   |          |          |         |
| H                                                                                                                                                                                                                     | 1.78191                                                                                                                                                                                                                                                                                                                                                                                                                                                                                                                                                                                                                                                                                                                                                                                                                                                                                                                                                                                                                                                                                                                                                                                                                                                                                                                                                                                                                                                                                                                                                                                                                                                                                                                                                                                                                                                                                                                                                                                                                                                                                                                                                                                                                                                                                                                                                                                                                                                                                                                                                                                                                                                                                                                                                                                                                                                                                                                                                                                                                                                                            | 2.92210  | -2.01160 |         |          |   |          |         |          |   |          |          |          |   |          |         |          |   |          |         |          |   |          |          |          |   |          |          |          |   |          |         |          |   |          |         |         |   |          |         |         |   |         |         |         |   |          |         |         |   |          |         |         |   |         |         |         |   |          |         |         |   |          |         |         |   |         |         |         |   |          |         |          |   |          |         |          |   |          |         |         |   |         |         |          |   |         |          |          |   |         |          |          |   |         |          |          |   |         |          |         |   |         |         |         |   |         |         |         |   |          |         |         |   |          |         |         |   |          |         |          |   |          |         |          |                                                                                                                                                                                                                       |                                                                                                                                                                                                                                                                                                                                                                                                                                                                                                                                                                                                                                                                                                                                                                                                                                                                                                                                                                                                                                                                                                                                                                                                                                                                                                                                                                                                                                                                                                                                                                                                                                                                                                                                                                                                                                                                                                                                                                                                                                                                                                                                                                                                                                                                                |         |          |          |          |         |          |          |          |          |          |          |          |          |         |          |          |          |          |         |          |          |         |          |          |          |         |          |          |          |          |         |          |          |          |         |         |          |          |         |          |          |          |                                                                                                                                                                                                                        |                                                                                                                                                                                                                                                                                                                                                                                                                                                                                                                                                                                                                                                                                                                                                                                                                                                                                                                                                                                                                                                                                                                                                                                                                                                                                                                                                                                                                                                                                                                                                                                                                                                                                                                                                                                                                                                                                                                                                                                                                                                                                                                                                                                                                                                                                                                                                                                                                                                                                                                                                                                                                                                                                                                                                                                                                                                                                                                                                                                                                                                                                      |   |          |          |          |   |          |         |          |   |          |          |          |   |          |         |          |   |          |         |          |   |          |          |          |   |          |          |          |   |         |         |          |   |          |         |          |   |          |         |          |   |          |         |          |   |          |          |         |   |          |          |         |   |         |          |         |   |          |          |         |   |         |          |         |   |         |          |          |   |          |          |          |   |          |          |          |   |          |         |          |   |         |          |          |   |         |          |          |   |         |          |          |   |         |          |          |   |         |          |          |   |         |          |          |   |         |          |          |   |         |          |          |   |         |         |          |   |         |         |          |   |         |         |          |   |         |         |          |   |         |         |          |   |          |          |         |   |          |         |         |   |          |         |         |   |          |         |         |   |          |         |         |   |          |          |         |   |          |          |         |   |          |          |         |   |          |          |         |
| H                                                                                                                                                                                                                     | 2.47611                                                                                                                                                                                                                                                                                                                                                                                                                                                                                                                                                                                                                                                                                                                                                                                                                                                                                                                                                                                                                                                                                                                                                                                                                                                                                                                                                                                                                                                                                                                                                                                                                                                                                                                                                                                                                                                                                                                                                                                                                                                                                                                                                                                                                                                                                                                                                                                                                                                                                                                                                                                                                                                                                                                                                                                                                                                                                                                                                                                                                                                                            | 1.41393  | -1.35610 |         |          |   |          |         |          |   |          |          |          |   |          |         |          |   |          |         |          |   |          |          |          |   |          |          |          |   |          |         |          |   |          |         |         |   |          |         |         |   |         |         |         |   |          |         |         |   |          |         |         |   |         |         |         |   |          |         |         |   |          |         |         |   |         |         |         |   |          |         |          |   |          |         |          |   |          |         |         |   |         |         |          |   |         |          |          |   |         |          |          |   |         |          |          |   |         |          |         |   |         |         |         |   |         |         |         |   |          |         |         |   |          |         |         |   |          |         |          |   |          |         |          |                                                                                                                                                                                                                       |                                                                                                                                                                                                                                                                                                                                                                                                                                                                                                                                                                                                                                                                                                                                                                                                                                                                                                                                                                                                                                                                                                                                                                                                                                                                                                                                                                                                                                                                                                                                                                                                                                                                                                                                                                                                                                                                                                                                                                                                                                                                                                                                                                                                                                                                                |         |          |          |          |         |          |          |          |          |          |          |          |          |         |          |          |          |          |         |          |          |         |          |          |          |         |          |          |          |          |         |          |          |          |         |         |          |          |         |          |          |          |                                                                                                                                                                                                                        |                                                                                                                                                                                                                                                                                                                                                                                                                                                                                                                                                                                                                                                                                                                                                                                                                                                                                                                                                                                                                                                                                                                                                                                                                                                                                                                                                                                                                                                                                                                                                                                                                                                                                                                                                                                                                                                                                                                                                                                                                                                                                                                                                                                                                                                                                                                                                                                                                                                                                                                                                                                                                                                                                                                                                                                                                                                                                                                                                                                                                                                                                      |   |          |          |          |   |          |         |          |   |          |          |          |   |          |         |          |   |          |         |          |   |          |          |          |   |          |          |          |   |         |         |          |   |          |         |          |   |          |         |          |   |          |         |          |   |          |          |         |   |          |          |         |   |         |          |         |   |          |          |         |   |         |          |         |   |         |          |          |   |          |          |          |   |          |          |          |   |          |         |          |   |         |          |          |   |         |          |          |   |         |          |          |   |         |          |          |   |         |          |          |   |         |          |          |   |         |          |          |   |         |          |          |   |         |         |          |   |         |         |          |   |         |         |          |   |         |         |          |   |         |         |          |   |          |          |         |   |          |         |         |   |          |         |         |   |          |         |         |   |          |         |         |   |          |          |         |   |          |          |         |   |          |          |         |   |          |          |         |
| H                                                                                                                                                                                                                     | 3.43837                                                                                                                                                                                                                                                                                                                                                                                                                                                                                                                                                                                                                                                                                                                                                                                                                                                                                                                                                                                                                                                                                                                                                                                                                                                                                                                                                                                                                                                                                                                                                                                                                                                                                                                                                                                                                                                                                                                                                                                                                                                                                                                                                                                                                                                                                                                                                                                                                                                                                                                                                                                                                                                                                                                                                                                                                                                                                                                                                                                                                                                                            | 2.91902  | -1.34926 |         |          |   |          |         |          |   |          |          |          |   |          |         |          |   |          |         |          |   |          |          |          |   |          |          |          |   |          |         |          |   |          |         |         |   |          |         |         |   |         |         |         |   |          |         |         |   |          |         |         |   |         |         |         |   |          |         |         |   |          |         |         |   |         |         |         |   |          |         |          |   |          |         |          |   |          |         |         |   |         |         |          |   |         |          |          |   |         |          |          |   |         |          |          |   |         |          |         |   |         |         |         |   |         |         |         |   |          |         |         |   |          |         |         |   |          |         |          |   |          |         |          |                                                                                                                                                                                                                       |                                                                                                                                                                                                                                                                                                                                                                                                                                                                                                                                                                                                                                                                                                                                                                                                                                                                                                                                                                                                                                                                                                                                                                                                                                                                                                                                                                                                                                                                                                                                                                                                                                                                                                                                                                                                                                                                                                                                                                                                                                                                                                                                                                                                                                                                                |         |          |          |          |         |          |          |          |          |          |          |          |          |         |          |          |          |          |         |          |          |         |          |          |          |         |          |          |          |          |         |          |          |          |         |         |          |          |         |          |          |          |                                                                                                                                                                                                                        |                                                                                                                                                                                                                                                                                                                                                                                                                                                                                                                                                                                                                                                                                                                                                                                                                                                                                                                                                                                                                                                                                                                                                                                                                                                                                                                                                                                                                                                                                                                                                                                                                                                                                                                                                                                                                                                                                                                                                                                                                                                                                                                                                                                                                                                                                                                                                                                                                                                                                                                                                                                                                                                                                                                                                                                                                                                                                                                                                                                                                                                                                      |   |          |          |          |   |          |         |          |   |          |          |          |   |          |         |          |   |          |         |          |   |          |          |          |   |          |          |          |   |         |         |          |   |          |         |          |   |          |         |          |   |          |         |          |   |          |          |         |   |          |          |         |   |         |          |         |   |          |          |         |   |         |          |         |   |         |          |          |   |          |          |          |   |          |          |          |   |          |         |          |   |         |          |          |   |         |          |          |   |         |          |          |   |         |          |          |   |         |          |          |   |         |          |          |   |         |          |          |   |         |          |          |   |         |         |          |   |         |         |          |   |         |         |          |   |         |         |          |   |         |         |          |   |          |          |         |   |          |         |         |   |          |         |         |   |          |         |         |   |          |         |         |   |          |          |         |   |          |          |         |   |          |          |         |   |          |          |         |
| N                                                                                                                                                                                                                     | 2.42574                                                                                                                                                                                                                                                                                                                                                                                                                                                                                                                                                                                                                                                                                                                                                                                                                                                                                                                                                                                                                                                                                                                                                                                                                                                                                                                                                                                                                                                                                                                                                                                                                                                                                                                                                                                                                                                                                                                                                                                                                                                                                                                                                                                                                                                                                                                                                                                                                                                                                                                                                                                                                                                                                                                                                                                                                                                                                                                                                                                                                                                                            | 3.87950  | 4.33132  |         |          |   |          |         |          |   |          |          |          |   |          |         |          |   |          |         |          |   |          |          |          |   |          |          |          |   |          |         |          |   |          |         |         |   |          |         |         |   |         |         |         |   |          |         |         |   |          |         |         |   |         |         |         |   |          |         |         |   |          |         |         |   |         |         |         |   |          |         |          |   |          |         |          |   |          |         |         |   |         |         |          |   |         |          |          |   |         |          |          |   |         |          |          |   |         |          |         |   |         |         |         |   |         |         |         |   |          |         |         |   |          |         |         |   |          |         |          |   |          |         |          |                                                                                                                                                                                                                       |                                                                                                                                                                                                                                                                                                                                                                                                                                                                                                                                                                                                                                                                                                                                                                                                                                                                                                                                                                                                                                                                                                                                                                                                                                                                                                                                                                                                                                                                                                                                                                                                                                                                                                                                                                                                                                                                                                                                                                                                                                                                                                                                                                                                                                                                                |         |          |          |          |         |          |          |          |          |          |          |          |          |         |          |          |          |          |         |          |          |         |          |          |          |         |          |          |          |          |         |          |          |          |         |         |          |          |         |          |          |          |                                                                                                                                                                                                                        |                                                                                                                                                                                                                                                                                                                                                                                                                                                                                                                                                                                                                                                                                                                                                                                                                                                                                                                                                                                                                                                                                                                                                                                                                                                                                                                                                                                                                                                                                                                                                                                                                                                                                                                                                                                                                                                                                                                                                                                                                                                                                                                                                                                                                                                                                                                                                                                                                                                                                                                                                                                                                                                                                                                                                                                                                                                                                                                                                                                                                                                                                      |   |          |          |          |   |          |         |          |   |          |          |          |   |          |         |          |   |          |         |          |   |          |          |          |   |          |          |          |   |         |         |          |   |          |         |          |   |          |         |          |   |          |         |          |   |          |          |         |   |          |          |         |   |         |          |         |   |          |          |         |   |         |          |         |   |         |          |          |   |          |          |          |   |          |          |          |   |          |         |          |   |         |          |          |   |         |          |          |   |         |          |          |   |         |          |          |   |         |          |          |   |         |          |          |   |         |          |          |   |         |          |          |   |         |         |          |   |         |         |          |   |         |         |          |   |         |         |          |   |         |         |          |   |          |          |         |   |          |         |         |   |          |         |         |   |          |         |         |   |          |         |         |   |          |          |         |   |          |          |         |   |          |          |         |   |          |          |         |
| O                                                                                                                                                                                                                     | 3.39809                                                                                                                                                                                                                                                                                                                                                                                                                                                                                                                                                                                                                                                                                                                                                                                                                                                                                                                                                                                                                                                                                                                                                                                                                                                                                                                                                                                                                                                                                                                                                                                                                                                                                                                                                                                                                                                                                                                                                                                                                                                                                                                                                                                                                                                                                                                                                                                                                                                                                                                                                                                                                                                                                                                                                                                                                                                                                                                                                                                                                                                                            | 4.06395  | 3.62350  |         |          |   |          |         |          |   |          |          |          |   |          |         |          |   |          |         |          |   |          |          |          |   |          |          |          |   |          |         |          |   |          |         |         |   |          |         |         |   |         |         |         |   |          |         |         |   |          |         |         |   |         |         |         |   |          |         |         |   |          |         |         |   |         |         |         |   |          |         |          |   |          |         |          |   |          |         |         |   |         |         |          |   |         |          |          |   |         |          |          |   |         |          |          |   |         |          |         |   |         |         |         |   |         |         |         |   |          |         |         |   |          |         |         |   |          |         |          |   |          |         |          |                                                                                                                                                                                                                       |                                                                                                                                                                                                                                                                                                                                                                                                                                                                                                                                                                                                                                                                                                                                                                                                                                                                                                                                                                                                                                                                                                                                                                                                                                                                                                                                                                                                                                                                                                                                                                                                                                                                                                                                                                                                                                                                                                                                                                                                                                                                                                                                                                                                                                                                                |         |          |          |          |         |          |          |          |          |          |          |          |          |         |          |          |          |          |         |          |          |         |          |          |          |         |          |          |          |          |         |          |          |          |         |         |          |          |         |          |          |          |                                                                                                                                                                                                                        |                                                                                                                                                                                                                                                                                                                                                                                                                                                                                                                                                                                                                                                                                                                                                                                                                                                                                                                                                                                                                                                                                                                                                                                                                                                                                                                                                                                                                                                                                                                                                                                                                                                                                                                                                                                                                                                                                                                                                                                                                                                                                                                                                                                                                                                                                                                                                                                                                                                                                                                                                                                                                                                                                                                                                                                                                                                                                                                                                                                                                                                                                      |   |          |          |          |   |          |         |          |   |          |          |          |   |          |         |          |   |          |         |          |   |          |          |          |   |          |          |          |   |         |         |          |   |          |         |          |   |          |         |          |   |          |         |          |   |          |          |         |   |          |          |         |   |         |          |         |   |          |          |         |   |         |          |         |   |         |          |          |   |          |          |          |   |          |          |          |   |          |         |          |   |         |          |          |   |         |          |          |   |         |          |          |   |         |          |          |   |         |          |          |   |         |          |          |   |         |          |          |   |         |          |          |   |         |         |          |   |         |         |          |   |         |         |          |   |         |         |          |   |         |         |          |   |          |          |         |   |          |         |         |   |          |         |         |   |          |         |         |   |          |         |         |   |          |          |         |   |          |          |         |   |          |          |         |   |          |          |         |
| O                                                                                                                                                                                                                     | 2.23106                                                                                                                                                                                                                                                                                                                                                                                                                                                                                                                                                                                                                                                                                                                                                                                                                                                                                                                                                                                                                                                                                                                                                                                                                                                                                                                                                                                                                                                                                                                                                                                                                                                                                                                                                                                                                                                                                                                                                                                                                                                                                                                                                                                                                                                                                                                                                                                                                                                                                                                                                                                                                                                                                                                                                                                                                                                                                                                                                                                                                                                                            | 4.39968  | 5.41976  |         |          |   |          |         |          |   |          |          |          |   |          |         |          |   |          |         |          |   |          |          |          |   |          |          |          |   |          |         |          |   |          |         |         |   |          |         |         |   |         |         |         |   |          |         |         |   |          |         |         |   |         |         |         |   |          |         |         |   |          |         |         |   |         |         |         |   |          |         |          |   |          |         |          |   |          |         |         |   |         |         |          |   |         |          |          |   |         |          |          |   |         |          |          |   |         |          |         |   |         |         |         |   |         |         |         |   |          |         |         |   |          |         |         |   |          |         |          |   |          |         |          |                                                                                                                                                                                                                       |                                                                                                                                                                                                                                                                                                                                                                                                                                                                                                                                                                                                                                                                                                                                                                                                                                                                                                                                                                                                                                                                                                                                                                                                                                                                                                                                                                                                                                                                                                                                                                                                                                                                                                                                                                                                                                                                                                                                                                                                                                                                                                                                                                                                                                                                                |         |          |          |          |         |          |          |          |          |          |          |          |          |         |          |          |          |          |         |          |          |         |          |          |          |         |          |          |          |          |         |          |          |          |         |         |          |          |         |          |          |          |                                                                                                                                                                                                                        |                                                                                                                                                                                                                                                                                                                                                                                                                                                                                                                                                                                                                                                                                                                                                                                                                                                                                                                                                                                                                                                                                                                                                                                                                                                                                                                                                                                                                                                                                                                                                                                                                                                                                                                                                                                                                                                                                                                                                                                                                                                                                                                                                                                                                                                                                                                                                                                                                                                                                                                                                                                                                                                                                                                                                                                                                                                                                                                                                                                                                                                                                      |   |          |          |          |   |          |         |          |   |          |          |          |   |          |         |          |   |          |         |          |   |          |          |          |   |          |          |          |   |         |         |          |   |          |         |          |   |          |         |          |   |          |         |          |   |          |          |         |   |          |          |         |   |         |          |         |   |          |          |         |   |         |          |         |   |         |          |          |   |          |          |          |   |          |          |          |   |          |         |          |   |         |          |          |   |         |          |          |   |         |          |          |   |         |          |          |   |         |          |          |   |         |          |          |   |         |          |          |   |         |          |          |   |         |         |          |   |         |         |          |   |         |         |          |   |         |         |          |   |         |         |          |   |          |          |         |   |          |         |         |   |          |         |         |   |          |         |         |   |          |         |         |   |          |          |         |   |          |          |         |   |          |          |         |   |          |          |         |
| C                                                                                                                                                                                                                     | -0.74118                                                                                                                                                                                                                                                                                                                                                                                                                                                                                                                                                                                                                                                                                                                                                                                                                                                                                                                                                                                                                                                                                                                                                                                                                                                                                                                                                                                                                                                                                                                                                                                                                                                                                                                                                                                                                                                                                                                                                                                                                                                                                                                                                                                                                                                                                                                                                                                                                                                                                                                                                                                                                                                                                                                                                                                                                                                                                                                                                                                                                                                                           | 1.94953  | 0.89107  |         |          |   |          |         |          |   |          |          |          |   |          |         |          |   |          |         |          |   |          |          |          |   |          |          |          |   |          |         |          |   |          |         |         |   |          |         |         |   |         |         |         |   |          |         |         |   |          |         |         |   |         |         |         |   |          |         |         |   |          |         |         |   |         |         |         |   |          |         |          |   |          |         |          |   |          |         |         |   |         |         |          |   |         |          |          |   |         |          |          |   |         |          |          |   |         |          |         |   |         |         |         |   |         |         |         |   |          |         |         |   |          |         |         |   |          |         |          |   |          |         |          |                                                                                                                                                                                                                       |                                                                                                                                                                                                                                                                                                                                                                                                                                                                                                                                                                                                                                                                                                                                                                                                                                                                                                                                                                                                                                                                                                                                                                                                                                                                                                                                                                                                                                                                                                                                                                                                                                                                                                                                                                                                                                                                                                                                                                                                                                                                                                                                                                                                                                                                                |         |          |          |          |         |          |          |          |          |          |          |          |          |         |          |          |          |          |         |          |          |         |          |          |          |         |          |          |          |          |         |          |          |          |         |         |          |          |         |          |          |          |                                                                                                                                                                                                                        |                                                                                                                                                                                                                                                                                                                                                                                                                                                                                                                                                                                                                                                                                                                                                                                                                                                                                                                                                                                                                                                                                                                                                                                                                                                                                                                                                                                                                                                                                                                                                                                                                                                                                                                                                                                                                                                                                                                                                                                                                                                                                                                                                                                                                                                                                                                                                                                                                                                                                                                                                                                                                                                                                                                                                                                                                                                                                                                                                                                                                                                                                      |   |          |          |          |   |          |         |          |   |          |          |          |   |          |         |          |   |          |         |          |   |          |          |          |   |          |          |          |   |         |         |          |   |          |         |          |   |          |         |          |   |          |         |          |   |          |          |         |   |          |          |         |   |         |          |         |   |          |          |         |   |         |          |         |   |         |          |          |   |          |          |          |   |          |          |          |   |          |         |          |   |         |          |          |   |         |          |          |   |         |          |          |   |         |          |          |   |         |          |          |   |         |          |          |   |         |          |          |   |         |          |          |   |         |         |          |   |         |         |          |   |         |         |          |   |         |         |          |   |         |         |          |   |          |          |         |   |          |         |         |   |          |         |         |   |          |         |         |   |          |         |         |   |          |          |         |   |          |          |         |   |          |          |         |   |          |          |         |
| O                                                                                                                                                                                                                     | -0.97969                                                                                                                                                                                                                                                                                                                                                                                                                                                                                                                                                                                                                                                                                                                                                                                                                                                                                                                                                                                                                                                                                                                                                                                                                                                                                                                                                                                                                                                                                                                                                                                                                                                                                                                                                                                                                                                                                                                                                                                                                                                                                                                                                                                                                                                                                                                                                                                                                                                                                                                                                                                                                                                                                                                                                                                                                                                                                                                                                                                                                                                                           | 0.92698  | 0.29845  |         |          |   |          |         |          |   |          |          |          |   |          |         |          |   |          |         |          |   |          |          |          |   |          |          |          |   |          |         |          |   |          |         |         |   |          |         |         |   |         |         |         |   |          |         |         |   |          |         |         |   |         |         |         |   |          |         |         |   |          |         |         |   |         |         |         |   |          |         |          |   |          |         |          |   |          |         |         |   |         |         |          |   |         |          |          |   |         |          |          |   |         |          |          |   |         |          |         |   |         |         |         |   |         |         |         |   |          |         |         |   |          |         |         |   |          |         |          |   |          |         |          |                                                                                                                                                                                                                       |                                                                                                                                                                                                                                                                                                                                                                                                                                                                                                                                                                                                                                                                                                                                                                                                                                                                                                                                                                                                                                                                                                                                                                                                                                                                                                                                                                                                                                                                                                                                                                                                                                                                                                                                                                                                                                                                                                                                                                                                                                                                                                                                                                                                                                                                                |         |          |          |          |         |          |          |          |          |          |          |          |          |         |          |          |          |          |         |          |          |         |          |          |          |         |          |          |          |          |         |          |          |          |         |         |          |          |         |          |          |          |                                                                                                                                                                                                                        |                                                                                                                                                                                                                                                                                                                                                                                                                                                                                                                                                                                                                                                                                                                                                                                                                                                                                                                                                                                                                                                                                                                                                                                                                                                                                                                                                                                                                                                                                                                                                                                                                                                                                                                                                                                                                                                                                                                                                                                                                                                                                                                                                                                                                                                                                                                                                                                                                                                                                                                                                                                                                                                                                                                                                                                                                                                                                                                                                                                                                                                                                      |   |          |          |          |   |          |         |          |   |          |          |          |   |          |         |          |   |          |         |          |   |          |          |          |   |          |          |          |   |         |         |          |   |          |         |          |   |          |         |          |   |          |         |          |   |          |          |         |   |          |          |         |   |         |          |         |   |          |          |         |   |         |          |         |   |         |          |          |   |          |          |          |   |          |          |          |   |          |         |          |   |         |          |          |   |         |          |          |   |         |          |          |   |         |          |          |   |         |          |          |   |         |          |          |   |         |          |          |   |         |          |          |   |         |         |          |   |         |         |          |   |         |         |          |   |         |         |          |   |         |         |          |   |          |          |         |   |          |         |         |   |          |         |         |   |          |         |         |   |          |         |         |   |          |          |         |   |          |          |         |   |          |          |         |   |          |          |         |
| O                                                                                                                                                                                                                     | -1.15897                                                                                                                                                                                                                                                                                                                                                                                                                                                                                                                                                                                                                                                                                                                                                                                                                                                                                                                                                                                                                                                                                                                                                                                                                                                                                                                                                                                                                                                                                                                                                                                                                                                                                                                                                                                                                                                                                                                                                                                                                                                                                                                                                                                                                                                                                                                                                                                                                                                                                                                                                                                                                                                                                                                                                                                                                                                                                                                                                                                                                                                                           | 3.15611  | 0.45772  |         |          |   |          |         |          |   |          |          |          |   |          |         |          |   |          |         |          |   |          |          |          |   |          |          |          |   |          |         |          |   |          |         |         |   |          |         |         |   |         |         |         |   |          |         |         |   |          |         |         |   |         |         |         |   |          |         |         |   |          |         |         |   |         |         |         |   |          |         |          |   |          |         |          |   |          |         |         |   |         |         |          |   |         |          |          |   |         |          |          |   |         |          |          |   |         |          |         |   |         |         |         |   |         |         |         |   |          |         |         |   |          |         |         |   |          |         |          |   |          |         |          |                                                                                                                                                                                                                       |                                                                                                                                                                                                                                                                                                                                                                                                                                                                                                                                                                                                                                                                                                                                                                                                                                                                                                                                                                                                                                                                                                                                                                                                                                                                                                                                                                                                                                                                                                                                                                                                                                                                                                                                                                                                                                                                                                                                                                                                                                                                                                                                                                                                                                                                                |         |          |          |          |         |          |          |          |          |          |          |          |          |         |          |          |          |          |         |          |          |         |          |          |          |         |          |          |          |          |         |          |          |          |         |         |          |          |         |          |          |          |                                                                                                                                                                                                                        |                                                                                                                                                                                                                                                                                                                                                                                                                                                                                                                                                                                                                                                                                                                                                                                                                                                                                                                                                                                                                                                                                                                                                                                                                                                                                                                                                                                                                                                                                                                                                                                                                                                                                                                                                                                                                                                                                                                                                                                                                                                                                                                                                                                                                                                                                                                                                                                                                                                                                                                                                                                                                                                                                                                                                                                                                                                                                                                                                                                                                                                                                      |   |          |          |          |   |          |         |          |   |          |          |          |   |          |         |          |   |          |         |          |   |          |          |          |   |          |          |          |   |         |         |          |   |          |         |          |   |          |         |          |   |          |         |          |   |          |          |         |   |          |          |         |   |         |          |         |   |          |          |         |   |         |          |         |   |         |          |          |   |          |          |          |   |          |          |          |   |          |         |          |   |         |          |          |   |         |          |          |   |         |          |          |   |         |          |          |   |         |          |          |   |         |          |          |   |         |          |          |   |         |          |          |   |         |         |          |   |         |         |          |   |         |         |          |   |         |         |          |   |         |         |          |   |          |          |         |   |          |         |         |   |          |         |         |   |          |         |         |   |          |         |         |   |          |          |         |   |          |          |         |   |          |          |         |   |          |          |         |
| H                                                                                                                                                                                                                     | -1.61247                                                                                                                                                                                                                                                                                                                                                                                                                                                                                                                                                                                                                                                                                                                                                                                                                                                                                                                                                                                                                                                                                                                                                                                                                                                                                                                                                                                                                                                                                                                                                                                                                                                                                                                                                                                                                                                                                                                                                                                                                                                                                                                                                                                                                                                                                                                                                                                                                                                                                                                                                                                                                                                                                                                                                                                                                                                                                                                                                                                                                                                                           | 3.01438  | -0.38529 |         |          |   |          |         |          |   |          |          |          |   |          |         |          |   |          |         |          |   |          |          |          |   |          |          |          |   |          |         |          |   |          |         |         |   |          |         |         |   |         |         |         |   |          |         |         |   |          |         |         |   |         |         |         |   |          |         |         |   |          |         |         |   |         |         |         |   |          |         |          |   |          |         |          |   |          |         |         |   |         |         |          |   |         |          |          |   |         |          |          |   |         |          |          |   |         |          |         |   |         |         |         |   |         |         |         |   |          |         |         |   |          |         |         |   |          |         |          |   |          |         |          |                                                                                                                                                                                                                       |                                                                                                                                                                                                                                                                                                                                                                                                                                                                                                                                                                                                                                                                                                                                                                                                                                                                                                                                                                                                                                                                                                                                                                                                                                                                                                                                                                                                                                                                                                                                                                                                                                                                                                                                                                                                                                                                                                                                                                                                                                                                                                                                                                                                                                                                                |         |          |          |          |         |          |          |          |          |          |          |          |          |         |          |          |          |          |         |          |          |         |          |          |          |         |          |          |          |          |         |          |          |          |         |         |          |          |         |          |          |          |                                                                                                                                                                                                                        |                                                                                                                                                                                                                                                                                                                                                                                                                                                                                                                                                                                                                                                                                                                                                                                                                                                                                                                                                                                                                                                                                                                                                                                                                                                                                                                                                                                                                                                                                                                                                                                                                                                                                                                                                                                                                                                                                                                                                                                                                                                                                                                                                                                                                                                                                                                                                                                                                                                                                                                                                                                                                                                                                                                                                                                                                                                                                                                                                                                                                                                                                      |   |          |          |          |   |          |         |          |   |          |          |          |   |          |         |          |   |          |         |          |   |          |          |          |   |          |          |          |   |         |         |          |   |          |         |          |   |          |         |          |   |          |         |          |   |          |          |         |   |          |          |         |   |         |          |         |   |          |          |         |   |         |          |         |   |         |          |          |   |          |          |          |   |          |          |          |   |          |         |          |   |         |          |          |   |         |          |          |   |         |          |          |   |         |          |          |   |         |          |          |   |         |          |          |   |         |          |          |   |         |          |          |   |         |         |          |   |         |         |          |   |         |         |          |   |         |         |          |   |         |         |          |   |          |          |         |   |          |         |         |   |          |         |         |   |          |         |         |   |          |         |         |   |          |          |         |   |          |          |         |   |          |          |         |   |          |          |         |
| C                                                                                                                                                                                                                     | 0.38989                                                                                                                                                                                                                                                                                                                                                                                                                                                                                                                                                                                                                                                                                                                                                                                                                                                                                                                                                                                                                                                                                                                                                                                                                                                                                                                                                                                                                                                                                                                                                                                                                                                                                                                                                                                                                                                                                                                                                                                                                                                                                                                                                                                                                                                                                                                                                                                                                                                                                                                                                                                                                                                                                                                                                                                                                                                                                                                                                                                                                                                                            | -1.63142 | -3.38514 |         |          |   |          |         |          |   |          |          |          |   |          |         |          |   |          |         |          |   |          |          |          |   |          |          |          |   |          |         |          |   |          |         |         |   |          |         |         |   |         |         |         |   |          |         |         |   |          |         |         |   |         |         |         |   |          |         |         |   |          |         |         |   |         |         |         |   |          |         |          |   |          |         |          |   |          |         |         |   |         |         |          |   |         |          |          |   |         |          |          |   |         |          |          |   |         |          |         |   |         |         |         |   |         |         |         |   |          |         |         |   |          |         |         |   |          |         |          |   |          |         |          |                                                                                                                                                                                                                       |                                                                                                                                                                                                                                                                                                                                                                                                                                                                                                                                                                                                                                                                                                                                                                                                                                                                                                                                                                                                                                                                                                                                                                                                                                                                                                                                                                                                                                                                                                                                                                                                                                                                                                                                                                                                                                                                                                                                                                                                                                                                                                                                                                                                                                                                                |         |          |          |          |         |          |          |          |          |          |          |          |          |         |          |          |          |          |         |          |          |         |          |          |          |         |          |          |          |          |         |          |          |          |         |         |          |          |         |          |          |          |                                                                                                                                                                                                                        |                                                                                                                                                                                                                                                                                                                                                                                                                                                                                                                                                                                                                                                                                                                                                                                                                                                                                                                                                                                                                                                                                                                                                                                                                                                                                                                                                                                                                                                                                                                                                                                                                                                                                                                                                                                                                                                                                                                                                                                                                                                                                                                                                                                                                                                                                                                                                                                                                                                                                                                                                                                                                                                                                                                                                                                                                                                                                                                                                                                                                                                                                      |   |          |          |          |   |          |         |          |   |          |          |          |   |          |         |          |   |          |         |          |   |          |          |          |   |          |          |          |   |         |         |          |   |          |         |          |   |          |         |          |   |          |         |          |   |          |          |         |   |          |          |         |   |         |          |         |   |          |          |         |   |         |          |         |   |         |          |          |   |          |          |          |   |          |          |          |   |          |         |          |   |         |          |          |   |         |          |          |   |         |          |          |   |         |          |          |   |         |          |          |   |         |          |          |   |         |          |          |   |         |          |          |   |         |         |          |   |         |         |          |   |         |         |          |   |         |         |          |   |         |         |          |   |          |          |         |   |          |         |         |   |          |         |         |   |          |         |         |   |          |         |         |   |          |          |         |   |          |          |         |   |          |          |         |   |          |          |         |
| C                                                                                                                                                                                                                     | 0.22305                                                                                                                                                                                                                                                                                                                                                                                                                                                                                                                                                                                                                                                                                                                                                                                                                                                                                                                                                                                                                                                                                                                                                                                                                                                                                                                                                                                                                                                                                                                                                                                                                                                                                                                                                                                                                                                                                                                                                                                                                                                                                                                                                                                                                                                                                                                                                                                                                                                                                                                                                                                                                                                                                                                                                                                                                                                                                                                                                                                                                                                                            | -0.26435 | -0.88930 |         |          |   |          |         |          |   |          |          |          |   |          |         |          |   |          |         |          |   |          |          |          |   |          |          |          |   |          |         |          |   |          |         |         |   |          |         |         |   |         |         |         |   |          |         |         |   |          |         |         |   |         |         |         |   |          |         |         |   |          |         |         |   |         |         |         |   |          |         |          |   |          |         |          |   |          |         |         |   |         |         |          |   |         |          |          |   |         |          |          |   |         |          |          |   |         |          |         |   |         |         |         |   |         |         |         |   |          |         |         |   |          |         |         |   |          |         |          |   |          |         |          |                                                                                                                                                                                                                       |                                                                                                                                                                                                                                                                                                                                                                                                                                                                                                                                                                                                                                                                                                                                                                                                                                                                                                                                                                                                                                                                                                                                                                                                                                                                                                                                                                                                                                                                                                                                                                                                                                                                                                                                                                                                                                                                                                                                                                                                                                                                                                                                                                                                                                                                                |         |          |          |          |         |          |          |          |          |          |          |          |          |         |          |          |          |          |         |          |          |         |          |          |          |         |          |          |          |          |         |          |          |          |         |         |          |          |         |          |          |          |                                                                                                                                                                                                                        |                                                                                                                                                                                                                                                                                                                                                                                                                                                                                                                                                                                                                                                                                                                                                                                                                                                                                                                                                                                                                                                                                                                                                                                                                                                                                                                                                                                                                                                                                                                                                                                                                                                                                                                                                                                                                                                                                                                                                                                                                                                                                                                                                                                                                                                                                                                                                                                                                                                                                                                                                                                                                                                                                                                                                                                                                                                                                                                                                                                                                                                                                      |   |          |          |          |   |          |         |          |   |          |          |          |   |          |         |          |   |          |         |          |   |          |          |          |   |          |          |          |   |         |         |          |   |          |         |          |   |          |         |          |   |          |         |          |   |          |          |         |   |          |          |         |   |         |          |         |   |          |          |         |   |         |          |         |   |         |          |          |   |          |          |          |   |          |          |          |   |          |         |          |   |         |          |          |   |         |          |          |   |         |          |          |   |         |          |          |   |         |          |          |   |         |          |          |   |         |          |          |   |         |          |          |   |         |         |          |   |         |         |          |   |         |         |          |   |         |         |          |   |         |         |          |   |          |          |         |   |          |         |         |   |          |         |         |   |          |         |         |   |          |         |         |   |          |          |         |   |          |          |         |   |          |          |         |   |          |          |         |
| C                                                                                                                                                                                                                     | 0.28289                                                                                                                                                                                                                                                                                                                                                                                                                                                                                                                                                                                                                                                                                                                                                                                                                                                                                                                                                                                                                                                                                                                                                                                                                                                                                                                                                                                                                                                                                                                                                                                                                                                                                                                                                                                                                                                                                                                                                                                                                                                                                                                                                                                                                                                                                                                                                                                                                                                                                                                                                                                                                                                                                                                                                                                                                                                                                                                                                                                                                                                                            | -2.34220 | -2.20228 |         |          |   |          |         |          |   |          |          |          |   |          |         |          |   |          |         |          |   |          |          |          |   |          |          |          |   |          |         |          |   |          |         |         |   |          |         |         |   |         |         |         |   |          |         |         |   |          |         |         |   |         |         |         |   |          |         |         |   |          |         |         |   |         |         |         |   |          |         |          |   |          |         |          |   |          |         |         |   |         |         |          |   |         |          |          |   |         |          |          |   |         |          |          |   |         |          |         |   |         |         |         |   |         |         |         |   |          |         |         |   |          |         |         |   |          |         |          |   |          |         |          |                                                                                                                                                                                                                       |                                                                                                                                                                                                                                                                                                                                                                                                                                                                                                                                                                                                                                                                                                                                                                                                                                                                                                                                                                                                                                                                                                                                                                                                                                                                                                                                                                                                                                                                                                                                                                                                                                                                                                                                                                                                                                                                                                                                                                                                                                                                                                                                                                                                                                                                                |         |          |          |          |         |          |          |          |          |          |          |          |          |         |          |          |          |          |         |          |          |         |          |          |          |         |          |          |          |          |         |          |          |          |         |         |          |          |         |          |          |          |                                                                                                                                                                                                                        |                                                                                                                                                                                                                                                                                                                                                                                                                                                                                                                                                                                                                                                                                                                                                                                                                                                                                                                                                                                                                                                                                                                                                                                                                                                                                                                                                                                                                                                                                                                                                                                                                                                                                                                                                                                                                                                                                                                                                                                                                                                                                                                                                                                                                                                                                                                                                                                                                                                                                                                                                                                                                                                                                                                                                                                                                                                                                                                                                                                                                                                                                      |   |          |          |          |   |          |         |          |   |          |          |          |   |          |         |          |   |          |         |          |   |          |          |          |   |          |          |          |   |         |         |          |   |          |         |          |   |          |         |          |   |          |         |          |   |          |          |         |   |          |          |         |   |         |          |         |   |          |          |         |   |         |          |         |   |         |          |          |   |          |          |          |   |          |          |          |   |          |         |          |   |         |          |          |   |         |          |          |   |         |          |          |   |         |          |          |   |         |          |          |   |         |          |          |   |         |          |          |   |         |          |          |   |         |         |          |   |         |         |          |   |         |         |          |   |         |         |          |   |         |         |          |   |          |          |         |   |          |         |         |   |          |         |         |   |          |         |         |   |          |         |         |   |          |          |         |   |          |          |         |   |          |          |         |   |          |          |         |
| C                                                                                                                                                                                                                     | 0.52235                                                                                                                                                                                                                                                                                                                                                                                                                                                                                                                                                                                                                                                                                                                                                                                                                                                                                                                                                                                                                                                                                                                                                                                                                                                                                                                                                                                                                                                                                                                                                                                                                                                                                                                                                                                                                                                                                                                                                                                                                                                                                                                                                                                                                                                                                                                                                                                                                                                                                                                                                                                                                                                                                                                                                                                                                                                                                                                                                                                                                                                                            | -0.24982 | -3.33505 |         |          |   |          |         |          |   |          |          |          |   |          |         |          |   |          |         |          |   |          |          |          |   |          |          |          |   |          |         |          |   |          |         |         |   |          |         |         |   |         |         |         |   |          |         |         |   |          |         |         |   |         |         |         |   |          |         |         |   |          |         |         |   |         |         |         |   |          |         |          |   |          |         |          |   |          |         |         |   |         |         |          |   |         |          |          |   |         |          |          |   |         |          |          |   |         |          |         |   |         |         |         |   |         |         |         |   |          |         |         |   |          |         |         |   |          |         |          |   |          |         |          |                                                                                                                                                                                                                       |                                                                                                                                                                                                                                                                                                                                                                                                                                                                                                                                                                                                                                                                                                                                                                                                                                                                                                                                                                                                                                                                                                                                                                                                                                                                                                                                                                                                                                                                                                                                                                                                                                                                                                                                                                                                                                                                                                                                                                                                                                                                                                                                                                                                                                                                                |         |          |          |          |         |          |          |          |          |          |          |          |          |         |          |          |          |          |         |          |          |         |          |          |          |         |          |          |          |          |         |          |          |          |         |         |          |          |         |          |          |          |                                                                                                                                                                                                                        |                                                                                                                                                                                                                                                                                                                                                                                                                                                                                                                                                                                                                                                                                                                                                                                                                                                                                                                                                                                                                                                                                                                                                                                                                                                                                                                                                                                                                                                                                                                                                                                                                                                                                                                                                                                                                                                                                                                                                                                                                                                                                                                                                                                                                                                                                                                                                                                                                                                                                                                                                                                                                                                                                                                                                                                                                                                                                                                                                                                                                                                                                      |   |          |          |          |   |          |         |          |   |          |          |          |   |          |         |          |   |          |         |          |   |          |          |          |   |          |          |          |   |         |         |          |   |          |         |          |   |          |         |          |   |          |         |          |   |          |          |         |   |          |          |         |   |         |          |         |   |          |          |         |   |         |          |         |   |         |          |          |   |          |          |          |   |          |          |          |   |          |         |          |   |         |          |          |   |         |          |          |   |         |          |          |   |         |          |          |   |         |          |          |   |         |          |          |   |         |          |          |   |         |          |          |   |         |         |          |   |         |         |          |   |         |         |          |   |         |         |          |   |         |         |          |   |          |          |         |   |          |         |         |   |          |         |         |   |          |         |         |   |          |         |         |   |          |          |         |   |          |          |         |   |          |          |         |   |          |          |         |
| C                                                                                                                                                                                                                     | 0.45616                                                                                                                                                                                                                                                                                                                                                                                                                                                                                                                                                                                                                                                                                                                                                                                                                                                                                                                                                                                                                                                                                                                                                                                                                                                                                                                                                                                                                                                                                                                                                                                                                                                                                                                                                                                                                                                                                                                                                                                                                                                                                                                                                                                                                                                                                                                                                                                                                                                                                                                                                                                                                                                                                                                                                                                                                                                                                                                                                                                                                                                                            | 0.39502  | -2.11341 |         |          |   |          |         |          |   |          |          |          |   |          |         |          |   |          |         |          |   |          |          |          |   |          |          |          |   |          |         |          |   |          |         |         |   |          |         |         |   |         |         |         |   |          |         |         |   |          |         |         |   |         |         |         |   |          |         |         |   |          |         |         |   |         |         |         |   |          |         |          |   |          |         |          |   |          |         |         |   |         |         |          |   |         |          |          |   |         |          |          |   |         |          |          |   |         |          |         |   |         |         |         |   |         |         |         |   |          |         |         |   |          |         |         |   |          |         |          |   |          |         |          |                                                                                                                                                                                                                       |                                                                                                                                                                                                                                                                                                                                                                                                                                                                                                                                                                                                                                                                                                                                                                                                                                                                                                                                                                                                                                                                                                                                                                                                                                                                                                                                                                                                                                                                                                                                                                                                                                                                                                                                                                                                                                                                                                                                                                                                                                                                                                                                                                                                                                                                                |         |          |          |          |         |          |          |          |          |          |          |          |          |         |          |          |          |          |         |          |          |         |          |          |          |         |          |          |          |          |         |          |          |          |         |         |          |          |         |          |          |          |                                                                                                                                                                                                                        |                                                                                                                                                                                                                                                                                                                                                                                                                                                                                                                                                                                                                                                                                                                                                                                                                                                                                                                                                                                                                                                                                                                                                                                                                                                                                                                                                                                                                                                                                                                                                                                                                                                                                                                                                                                                                                                                                                                                                                                                                                                                                                                                                                                                                                                                                                                                                                                                                                                                                                                                                                                                                                                                                                                                                                                                                                                                                                                                                                                                                                                                                      |   |          |          |          |   |          |         |          |   |          |          |          |   |          |         |          |   |          |         |          |   |          |          |          |   |          |          |          |   |         |         |          |   |          |         |          |   |          |         |          |   |          |         |          |   |          |          |         |   |          |          |         |   |         |          |         |   |          |          |         |   |         |          |         |   |         |          |          |   |          |          |          |   |          |          |          |   |          |         |          |   |         |          |          |   |         |          |          |   |         |          |          |   |         |          |          |   |         |          |          |   |         |          |          |   |         |          |          |   |         |          |          |   |         |         |          |   |         |         |          |   |         |         |          |   |         |         |          |   |         |         |          |   |          |          |         |   |          |         |         |   |          |         |         |   |          |         |         |   |          |         |         |   |          |          |         |   |          |          |         |   |          |          |         |   |          |          |         |
| C                                                                                                                                                                                                                     | 0.25984                                                                                                                                                                                                                                                                                                                                                                                                                                                                                                                                                                                                                                                                                                                                                                                                                                                                                                                                                                                                                                                                                                                                                                                                                                                                                                                                                                                                                                                                                                                                                                                                                                                                                                                                                                                                                                                                                                                                                                                                                                                                                                                                                                                                                                                                                                                                                                                                                                                                                                                                                                                                                                                                                                                                                                                                                                                                                                                                                                                                                                                                            | -1.68403 | -0.96825 |         |          |   |          |         |          |   |          |          |          |   |          |         |          |   |          |         |          |   |          |          |          |   |          |          |          |   |          |         |          |   |          |         |         |   |          |         |         |   |         |         |         |   |          |         |         |   |          |         |         |   |         |         |         |   |          |         |         |   |          |         |         |   |         |         |         |   |          |         |          |   |          |         |          |   |          |         |         |   |         |         |          |   |         |          |          |   |         |          |          |   |         |          |          |   |         |          |         |   |         |         |         |   |         |         |         |   |          |         |         |   |          |         |         |   |          |         |          |   |          |         |          |                                                                                                                                                                                                                       |                                                                                                                                                                                                                                                                                                                                                                                                                                                                                                                                                                                                                                                                                                                                                                                                                                                                                                                                                                                                                                                                                                                                                                                                                                                                                                                                                                                                                                                                                                                                                                                                                                                                                                                                                                                                                                                                                                                                                                                                                                                                                                                                                                                                                                                                                |         |          |          |          |         |          |          |          |          |          |          |          |          |         |          |          |          |          |         |          |          |         |          |          |          |         |          |          |          |          |         |          |          |          |         |         |          |          |         |          |          |          |                                                                                                                                                                                                                        |                                                                                                                                                                                                                                                                                                                                                                                                                                                                                                                                                                                                                                                                                                                                                                                                                                                                                                                                                                                                                                                                                                                                                                                                                                                                                                                                                                                                                                                                                                                                                                                                                                                                                                                                                                                                                                                                                                                                                                                                                                                                                                                                                                                                                                                                                                                                                                                                                                                                                                                                                                                                                                                                                                                                                                                                                                                                                                                                                                                                                                                                                      |   |          |          |          |   |          |         |          |   |          |          |          |   |          |         |          |   |          |         |          |   |          |          |          |   |          |          |          |   |         |         |          |   |          |         |          |   |          |         |          |   |          |         |          |   |          |          |         |   |          |          |         |   |         |          |         |   |          |          |         |   |         |          |         |   |         |          |          |   |          |          |          |   |          |          |          |   |          |         |          |   |         |          |          |   |         |          |          |   |         |          |          |   |         |          |          |   |         |          |          |   |         |          |          |   |         |          |          |   |         |          |          |   |         |         |          |   |         |         |          |   |         |         |          |   |         |         |          |   |         |         |          |   |          |          |         |   |          |         |         |   |          |         |         |   |          |         |         |   |          |         |         |   |          |          |         |   |          |          |         |   |          |          |         |   |          |          |         |
| H                                                                                                                                                                                                                     | 0.25197                                                                                                                                                                                                                                                                                                                                                                                                                                                                                                                                                                                                                                                                                                                                                                                                                                                                                                                                                                                                                                                                                                                                                                                                                                                                                                                                                                                                                                                                                                                                                                                                                                                                                                                                                                                                                                                                                                                                                                                                                                                                                                                                                                                                                                                                                                                                                                                                                                                                                                                                                                                                                                                                                                                                                                                                                                                                                                                                                                                                                                                                            | -3.42042 | -2.22582 |         |          |   |          |         |          |   |          |          |          |   |          |         |          |   |          |         |          |   |          |          |          |   |          |          |          |   |          |         |          |   |          |         |         |   |          |         |         |   |         |         |         |   |          |         |         |   |          |         |         |   |         |         |         |   |          |         |         |   |          |         |         |   |         |         |         |   |          |         |          |   |          |         |          |   |          |         |         |   |         |         |          |   |         |          |          |   |         |          |          |   |         |          |          |   |         |          |         |   |         |         |         |   |         |         |         |   |          |         |         |   |          |         |         |   |          |         |          |   |          |         |          |                                                                                                                                                                                                                       |                                                                                                                                                                                                                                                                                                                                                                                                                                                                                                                                                                                                                                                                                                                                                                                                                                                                                                                                                                                                                                                                                                                                                                                                                                                                                                                                                                                                                                                                                                                                                                                                                                                                                                                                                                                                                                                                                                                                                                                                                                                                                                                                                                                                                                                                                |         |          |          |          |         |          |          |          |          |          |          |          |          |         |          |          |          |          |         |          |          |         |          |          |          |         |          |          |          |          |         |          |          |          |         |         |          |          |         |          |          |          |                                                                                                                                                                                                                        |                                                                                                                                                                                                                                                                                                                                                                                                                                                                                                                                                                                                                                                                                                                                                                                                                                                                                                                                                                                                                                                                                                                                                                                                                                                                                                                                                                                                                                                                                                                                                                                                                                                                                                                                                                                                                                                                                                                                                                                                                                                                                                                                                                                                                                                                                                                                                                                                                                                                                                                                                                                                                                                                                                                                                                                                                                                                                                                                                                                                                                                                                      |   |          |          |          |   |          |         |          |   |          |          |          |   |          |         |          |   |          |         |          |   |          |          |          |   |          |          |          |   |         |         |          |   |          |         |          |   |          |         |          |   |          |         |          |   |          |          |         |   |          |          |         |   |         |          |         |   |          |          |         |   |         |          |         |   |         |          |          |   |          |          |          |   |          |          |          |   |          |         |          |   |         |          |          |   |         |          |          |   |         |          |          |   |         |          |          |   |         |          |          |   |         |          |          |   |         |          |          |   |         |          |          |   |         |         |          |   |         |         |          |   |         |         |          |   |         |         |          |   |         |         |          |   |          |          |         |   |          |         |         |   |          |         |         |   |          |         |         |   |          |         |         |   |          |          |         |   |          |          |         |   |          |          |         |   |          |          |         |
| H                                                                                                                                                                                                                     | 0.63780                                                                                                                                                                                                                                                                                                                                                                                                                                                                                                                                                                                                                                                                                                                                                                                                                                                                                                                                                                                                                                                                                                                                                                                                                                                                                                                                                                                                                                                                                                                                                                                                                                                                                                                                                                                                                                                                                                                                                                                                                                                                                                                                                                                                                                                                                                                                                                                                                                                                                                                                                                                                                                                                                                                                                                                                                                                                                                                                                                                                                                                                            | 1.45614  | -2.12340 |         |          |   |          |         |          |   |          |          |          |   |          |         |          |   |          |         |          |   |          |          |          |   |          |          |          |   |          |         |          |   |          |         |         |   |          |         |         |   |         |         |         |   |          |         |         |   |          |         |         |   |         |         |         |   |          |         |         |   |          |         |         |   |         |         |         |   |          |         |          |   |          |         |          |   |          |         |         |   |         |         |          |   |         |          |          |   |         |          |          |   |         |          |          |   |         |          |         |   |         |         |         |   |         |         |         |   |          |         |         |   |          |         |         |   |          |         |          |   |          |         |          |                                                                                                                                                                                                                       |                                                                                                                                                                                                                                                                                                                                                                                                                                                                                                                                                                                                                                                                                                                                                                                                                                                                                                                                                                                                                                                                                                                                                                                                                                                                                                                                                                                                                                                                                                                                                                                                                                                                                                                                                                                                                                                                                                                                                                                                                                                                                                                                                                                                                                                                                |         |          |          |          |         |          |          |          |          |          |          |          |          |         |          |          |          |          |         |          |          |         |          |          |          |         |          |          |          |          |         |          |          |          |         |         |          |          |         |          |          |          |                                                                                                                                                                                                                        |                                                                                                                                                                                                                                                                                                                                                                                                                                                                                                                                                                                                                                                                                                                                                                                                                                                                                                                                                                                                                                                                                                                                                                                                                                                                                                                                                                                                                                                                                                                                                                                                                                                                                                                                                                                                                                                                                                                                                                                                                                                                                                                                                                                                                                                                                                                                                                                                                                                                                                                                                                                                                                                                                                                                                                                                                                                                                                                                                                                                                                                                                      |   |          |          |          |   |          |         |          |   |          |          |          |   |          |         |          |   |          |         |          |   |          |          |          |   |          |          |          |   |         |         |          |   |          |         |          |   |          |         |          |   |          |         |          |   |          |          |         |   |          |          |         |   |         |          |         |   |          |          |         |   |         |          |         |   |         |          |          |   |          |          |          |   |          |          |          |   |          |         |          |   |         |          |          |   |         |          |          |   |         |          |          |   |         |          |          |   |         |          |          |   |         |          |          |   |         |          |          |   |         |          |          |   |         |         |          |   |         |         |          |   |         |         |          |   |         |         |          |   |         |         |          |   |          |          |         |   |          |         |         |   |          |         |         |   |          |         |         |   |          |         |         |   |          |          |         |   |          |          |         |   |          |          |         |   |          |          |         |
| C                                                                                                                                                                                                                     | 0.10692                                                                                                                                                                                                                                                                                                                                                                                                                                                                                                                                                                                                                                                                                                                                                                                                                                                                                                                                                                                                                                                                                                                                                                                                                                                                                                                                                                                                                                                                                                                                                                                                                                                                                                                                                                                                                                                                                                                                                                                                                                                                                                                                                                                                                                                                                                                                                                                                                                                                                                                                                                                                                                                                                                                                                                                                                                                                                                                                                                                                                                                                            | 0.55189  | 0.35390  |         |          |   |          |         |          |   |          |          |          |   |          |         |          |   |          |         |          |   |          |          |          |   |          |          |          |   |          |         |          |   |          |         |         |   |          |         |         |   |         |         |         |   |          |         |         |   |          |         |         |   |         |         |         |   |          |         |         |   |          |         |         |   |         |         |         |   |          |         |          |   |          |         |          |   |          |         |         |   |         |         |          |   |         |          |          |   |         |          |          |   |         |          |          |   |         |          |         |   |         |         |         |   |         |         |         |   |          |         |         |   |          |         |         |   |          |         |          |   |          |         |          |                                                                                                                                                                                                                       |                                                                                                                                                                                                                                                                                                                                                                                                                                                                                                                                                                                                                                                                                                                                                                                                                                                                                                                                                                                                                                                                                                                                                                                                                                                                                                                                                                                                                                                                                                                                                                                                                                                                                                                                                                                                                                                                                                                                                                                                                                                                                                                                                                                                                                                                                |         |          |          |          |         |          |          |          |          |          |          |          |          |         |          |          |          |          |         |          |          |         |          |          |          |         |          |          |          |          |         |          |          |          |         |         |          |          |         |          |          |          |                                                                                                                                                                                                                        |                                                                                                                                                                                                                                                                                                                                                                                                                                                                                                                                                                                                                                                                                                                                                                                                                                                                                                                                                                                                                                                                                                                                                                                                                                                                                                                                                                                                                                                                                                                                                                                                                                                                                                                                                                                                                                                                                                                                                                                                                                                                                                                                                                                                                                                                                                                                                                                                                                                                                                                                                                                                                                                                                                                                                                                                                                                                                                                                                                                                                                                                                      |   |          |          |          |   |          |         |          |   |          |          |          |   |          |         |          |   |          |         |          |   |          |          |          |   |          |          |          |   |         |         |          |   |          |         |          |   |          |         |          |   |          |         |          |   |          |          |         |   |          |          |         |   |         |          |         |   |          |          |         |   |         |          |         |   |         |          |          |   |          |          |          |   |          |          |          |   |          |         |          |   |         |          |          |   |         |          |          |   |         |          |          |   |         |          |          |   |         |          |          |   |         |          |          |   |         |          |          |   |         |          |          |   |         |         |          |   |         |         |          |   |         |         |          |   |         |         |          |   |         |         |          |   |          |          |         |   |          |         |         |   |          |         |         |   |          |         |         |   |          |         |         |   |          |          |         |   |          |          |         |   |          |          |         |   |          |          |         |
| C                                                                                                                                                                                                                     | 0.71451                                                                                                                                                                                                                                                                                                                                                                                                                                                                                                                                                                                                                                                                                                                                                                                                                                                                                                                                                                                                                                                                                                                                                                                                                                                                                                                                                                                                                                                                                                                                                                                                                                                                                                                                                                                                                                                                                                                                                                                                                                                                                                                                                                                                                                                                                                                                                                                                                                                                                                                                                                                                                                                                                                                                                                                                                                                                                                                                                                                                                                                                            | 2.30149  | 2.55323  |         |          |   |          |         |          |   |          |          |          |   |          |         |          |   |          |         |          |   |          |          |          |   |          |          |          |   |          |         |          |   |          |         |         |   |          |         |         |   |         |         |         |   |          |         |         |   |          |         |         |   |         |         |         |   |          |         |         |   |          |         |         |   |         |         |         |   |          |         |          |   |          |         |          |   |          |         |         |   |         |         |          |   |         |          |          |   |         |          |          |   |         |          |          |   |         |          |         |   |         |         |         |   |         |         |         |   |          |         |         |   |          |         |         |   |          |         |          |   |          |         |          |                                                                                                                                                                                                                       |                                                                                                                                                                                                                                                                                                                                                                                                                                                                                                                                                                                                                                                                                                                                                                                                                                                                                                                                                                                                                                                                                                                                                                                                                                                                                                                                                                                                                                                                                                                                                                                                                                                                                                                                                                                                                                                                                                                                                                                                                                                                                                                                                                                                                                                                                |         |          |          |          |         |          |          |          |          |          |          |          |          |         |          |          |          |          |         |          |          |         |          |          |          |         |          |          |          |          |         |          |          |          |         |         |          |          |         |          |          |          |                                                                                                                                                                                                                        |                                                                                                                                                                                                                                                                                                                                                                                                                                                                                                                                                                                                                                                                                                                                                                                                                                                                                                                                                                                                                                                                                                                                                                                                                                                                                                                                                                                                                                                                                                                                                                                                                                                                                                                                                                                                                                                                                                                                                                                                                                                                                                                                                                                                                                                                                                                                                                                                                                                                                                                                                                                                                                                                                                                                                                                                                                                                                                                                                                                                                                                                                      |   |          |          |          |   |          |         |          |   |          |          |          |   |          |         |          |   |          |         |          |   |          |          |          |   |          |          |          |   |         |         |          |   |          |         |          |   |          |         |          |   |          |         |          |   |          |          |         |   |          |          |         |   |         |          |         |   |          |          |         |   |         |          |         |   |         |          |          |   |          |          |          |   |          |          |          |   |          |         |          |   |         |          |          |   |         |          |          |   |         |          |          |   |         |          |          |   |         |          |          |   |         |          |          |   |         |          |          |   |         |          |          |   |         |         |          |   |         |         |          |   |         |         |          |   |         |         |          |   |         |         |          |   |          |          |         |   |          |         |         |   |          |         |         |   |          |         |         |   |          |         |         |   |          |          |         |   |          |          |         |   |          |          |         |   |          |          |         |
| C                                                                                                                                                                                                                     | 0.02490                                                                                                                                                                                                                                                                                                                                                                                                                                                                                                                                                                                                                                                                                                                                                                                                                                                                                                                                                                                                                                                                                                                                                                                                                                                                                                                                                                                                                                                                                                                                                                                                                                                                                                                                                                                                                                                                                                                                                                                                                                                                                                                                                                                                                                                                                                                                                                                                                                                                                                                                                                                                                                                                                                                                                                                                                                                                                                                                                                                                                                                                            | 1.97534  | 0.25798  |         |          |   |          |         |          |   |          |          |          |   |          |         |          |   |          |         |          |   |          |          |          |   |          |          |          |   |          |         |          |   |          |         |         |   |          |         |         |   |         |         |         |   |          |         |         |   |          |         |         |   |         |         |         |   |          |         |         |   |          |         |         |   |         |         |         |   |          |         |          |   |          |         |          |   |          |         |         |   |         |         |          |   |         |          |          |   |         |          |          |   |         |          |          |   |         |          |         |   |         |         |         |   |         |         |         |   |          |         |         |   |          |         |         |   |          |         |          |   |          |         |          |                                                                                                                                                                                                                       |                                                                                                                                                                                                                                                                                                                                                                                                                                                                                                                                                                                                                                                                                                                                                                                                                                                                                                                                                                                                                                                                                                                                                                                                                                                                                                                                                                                                                                                                                                                                                                                                                                                                                                                                                                                                                                                                                                                                                                                                                                                                                                                                                                                                                                                                                |         |          |          |          |         |          |          |          |          |          |          |          |          |         |          |          |          |          |         |          |          |         |          |          |          |         |          |          |          |          |         |          |          |          |         |         |          |          |         |          |          |          |                                                                                                                                                                                                                        |                                                                                                                                                                                                                                                                                                                                                                                                                                                                                                                                                                                                                                                                                                                                                                                                                                                                                                                                                                                                                                                                                                                                                                                                                                                                                                                                                                                                                                                                                                                                                                                                                                                                                                                                                                                                                                                                                                                                                                                                                                                                                                                                                                                                                                                                                                                                                                                                                                                                                                                                                                                                                                                                                                                                                                                                                                                                                                                                                                                                                                                                                      |   |          |          |          |   |          |         |          |   |          |          |          |   |          |         |          |   |          |         |          |   |          |          |          |   |          |          |          |   |         |         |          |   |          |         |          |   |          |         |          |   |          |         |          |   |          |          |         |   |          |          |         |   |         |          |         |   |          |          |         |   |         |          |         |   |         |          |          |   |          |          |          |   |          |          |          |   |          |         |          |   |         |          |          |   |         |          |          |   |         |          |          |   |         |          |          |   |         |          |          |   |         |          |          |   |         |          |          |   |         |          |          |   |         |         |          |   |         |         |          |   |         |         |          |   |         |         |          |   |         |         |          |   |          |          |         |   |          |         |         |   |          |         |         |   |          |         |         |   |          |         |         |   |          |          |         |   |          |          |         |   |          |          |         |   |          |          |         |
| C                                                                                                                                                                                                                     | 0.20861                                                                                                                                                                                                                                                                                                                                                                                                                                                                                                                                                                                                                                                                                                                                                                                                                                                                                                                                                                                                                                                                                                                                                                                                                                                                                                                                                                                                                                                                                                                                                                                                                                                                                                                                                                                                                                                                                                                                                                                                                                                                                                                                                                                                                                                                                                                                                                                                                                                                                                                                                                                                                                                                                                                                                                                                                                                                                                                                                                                                                                                                            | 0.10705  | 1.69848  |         |          |   |          |         |          |   |          |          |          |   |          |         |          |   |          |         |          |   |          |          |          |   |          |          |          |   |          |         |          |   |          |         |         |   |          |         |         |   |         |         |         |   |          |         |         |   |          |         |         |   |         |         |         |   |          |         |         |   |          |         |         |   |         |         |         |   |          |         |          |   |          |         |          |   |          |         |         |   |         |         |          |   |         |          |          |   |         |          |          |   |         |          |          |   |         |          |         |   |         |         |         |   |         |         |         |   |          |         |         |   |          |         |         |   |          |         |          |   |          |         |          |                                                                                                                                                                                                                       |                                                                                                                                                                                                                                                                                                                                                                                                                                                                                                                                                                                                                                                                                                                                                                                                                                                                                                                                                                                                                                                                                                                                                                                                                                                                                                                                                                                                                                                                                                                                                                                                                                                                                                                                                                                                                                                                                                                                                                                                                                                                                                                                                                                                                                                                                |         |          |          |          |         |          |          |          |          |          |          |          |          |         |          |          |          |          |         |          |          |         |          |          |          |         |          |          |          |          |         |          |          |          |         |         |          |          |         |          |          |          |                                                                                                                                                                                                                        |                                                                                                                                                                                                                                                                                                                                                                                                                                                                                                                                                                                                                                                                                                                                                                                                                                                                                                                                                                                                                                                                                                                                                                                                                                                                                                                                                                                                                                                                                                                                                                                                                                                                                                                                                                                                                                                                                                                                                                                                                                                                                                                                                                                                                                                                                                                                                                                                                                                                                                                                                                                                                                                                                                                                                                                                                                                                                                                                                                                                                                                                                      |   |          |          |          |   |          |         |          |   |          |          |          |   |          |         |          |   |          |         |          |   |          |          |          |   |          |          |          |   |         |         |          |   |          |         |          |   |          |         |          |   |          |         |          |   |          |          |         |   |          |          |         |   |         |          |         |   |          |          |         |   |         |          |         |   |         |          |          |   |          |          |          |   |          |          |          |   |          |         |          |   |         |          |          |   |         |          |          |   |         |          |          |   |         |          |          |   |         |          |          |   |         |          |          |   |         |          |          |   |         |          |          |   |         |         |          |   |         |         |          |   |         |         |          |   |         |         |          |   |         |         |          |   |          |          |         |   |          |         |         |   |          |         |         |   |          |         |         |   |          |         |         |   |          |          |         |   |          |          |         |   |          |          |         |   |          |          |         |
| C                                                                                                                                                                                                                     | 0.56216                                                                                                                                                                                                                                                                                                                                                                                                                                                                                                                                                                                                                                                                                                                                                                                                                                                                                                                                                                                                                                                                                                                                                                                                                                                                                                                                                                                                                                                                                                                                                                                                                                                                                                                                                                                                                                                                                                                                                                                                                                                                                                                                                                                                                                                                                                                                                                                                                                                                                                                                                                                                                                                                                                                                                                                                                                                                                                                                                                                                                                                                            | 0.94184  | 2.75275  |         |          |   |          |         |          |   |          |          |          |   |          |         |          |   |          |         |          |   |          |          |          |   |          |          |          |   |          |         |          |   |          |         |         |   |          |         |         |   |         |         |         |   |          |         |         |   |          |         |         |   |         |         |         |   |          |         |         |   |          |         |         |   |         |         |         |   |          |         |          |   |          |         |          |   |          |         |         |   |         |         |          |   |         |          |          |   |         |          |          |   |         |          |          |   |         |          |         |   |         |         |         |   |         |         |         |   |          |         |         |   |          |         |         |   |          |         |          |   |          |         |          |                                                                                                                                                                                                                       |                                                                                                                                                                                                                                                                                                                                                                                                                                                                                                                                                                                                                                                                                                                                                                                                                                                                                                                                                                                                                                                                                                                                                                                                                                                                                                                                                                                                                                                                                                                                                                                                                                                                                                                                                                                                                                                                                                                                                                                                                                                                                                                                                                                                                                                                                |         |          |          |          |         |          |          |          |          |          |          |          |          |         |          |          |          |          |         |          |          |         |          |          |          |         |          |          |          |          |         |          |          |          |         |         |          |          |         |          |          |          |                                                                                                                                                                                                                        |                                                                                                                                                                                                                                                                                                                                                                                                                                                                                                                                                                                                                                                                                                                                                                                                                                                                                                                                                                                                                                                                                                                                                                                                                                                                                                                                                                                                                                                                                                                                                                                                                                                                                                                                                                                                                                                                                                                                                                                                                                                                                                                                                                                                                                                                                                                                                                                                                                                                                                                                                                                                                                                                                                                                                                                                                                                                                                                                                                                                                                                                                      |   |          |          |          |   |          |         |          |   |          |          |          |   |          |         |          |   |          |         |          |   |          |          |          |   |          |          |          |   |         |         |          |   |          |         |          |   |          |         |          |   |          |         |          |   |          |          |         |   |          |          |         |   |         |          |         |   |          |          |         |   |         |          |         |   |         |          |          |   |          |          |          |   |          |          |          |   |          |         |          |   |         |          |          |   |         |          |          |   |         |          |          |   |         |          |          |   |         |          |          |   |         |          |          |   |         |          |          |   |         |          |          |   |         |         |          |   |         |         |          |   |         |         |          |   |         |         |          |   |         |         |          |   |          |          |         |   |          |         |         |   |          |         |         |   |          |         |         |   |          |         |         |   |          |          |         |   |          |          |         |   |          |          |         |   |          |          |         |
| C                                                                                                                                                                                                                     | 0.37333                                                                                                                                                                                                                                                                                                                                                                                                                                                                                                                                                                                                                                                                                                                                                                                                                                                                                                                                                                                                                                                                                                                                                                                                                                                                                                                                                                                                                                                                                                                                                                                                                                                                                                                                                                                                                                                                                                                                                                                                                                                                                                                                                                                                                                                                                                                                                                                                                                                                                                                                                                                                                                                                                                                                                                                                                                                                                                                                                                                                                                                                            | 2.81503  | 1.31290  |         |          |   |          |         |          |   |          |          |          |   |          |         |          |   |          |         |          |   |          |          |          |   |          |          |          |   |          |         |          |   |          |         |         |   |          |         |         |   |         |         |         |   |          |         |         |   |          |         |         |   |         |         |         |   |          |         |         |   |          |         |         |   |         |         |         |   |          |         |          |   |          |         |          |   |          |         |         |   |         |         |          |   |         |          |          |   |         |          |          |   |         |          |          |   |         |          |         |   |         |         |         |   |         |         |         |   |          |         |         |   |          |         |         |   |          |         |          |   |          |         |          |                                                                                                                                                                                                                       |                                                                                                                                                                                                                                                                                                                                                                                                                                                                                                                                                                                                                                                                                                                                                                                                                                                                                                                                                                                                                                                                                                                                                                                                                                                                                                                                                                                                                                                                                                                                                                                                                                                                                                                                                                                                                                                                                                                                                                                                                                                                                                                                                                                                                                                                                |         |          |          |          |         |          |          |          |          |          |          |          |          |         |          |          |          |          |         |          |          |         |          |          |          |         |          |          |          |          |         |          |          |          |         |         |          |          |         |          |          |          |                                                                                                                                                                                                                        |                                                                                                                                                                                                                                                                                                                                                                                                                                                                                                                                                                                                                                                                                                                                                                                                                                                                                                                                                                                                                                                                                                                                                                                                                                                                                                                                                                                                                                                                                                                                                                                                                                                                                                                                                                                                                                                                                                                                                                                                                                                                                                                                                                                                                                                                                                                                                                                                                                                                                                                                                                                                                                                                                                                                                                                                                                                                                                                                                                                                                                                                                      |   |          |          |          |   |          |         |          |   |          |          |          |   |          |         |          |   |          |         |          |   |          |          |          |   |          |          |          |   |         |         |          |   |          |         |          |   |          |         |          |   |          |         |          |   |          |          |         |   |          |          |         |   |         |          |         |   |          |          |         |   |         |          |         |   |         |          |          |   |          |          |          |   |          |          |          |   |          |         |          |   |         |          |          |   |         |          |          |   |         |          |          |   |         |          |          |   |         |          |          |   |         |          |          |   |         |          |          |   |         |          |          |   |         |         |          |   |         |         |          |   |         |         |          |   |         |         |          |   |         |         |          |   |          |          |         |   |          |         |         |   |          |         |         |   |          |         |         |   |          |         |         |   |          |          |         |   |          |          |         |   |          |          |         |   |          |          |         |
| H                                                                                                                                                                                                                     | 0.67853                                                                                                                                                                                                                                                                                                                                                                                                                                                                                                                                                                                                                                                                                                                                                                                                                                                                                                                                                                                                                                                                                                                                                                                                                                                                                                                                                                                                                                                                                                                                                                                                                                                                                                                                                                                                                                                                                                                                                                                                                                                                                                                                                                                                                                                                                                                                                                                                                                                                                                                                                                                                                                                                                                                                                                                                                                                                                                                                                                                                                                                                            | 0.50323  | 3.73337  |         |          |   |          |         |          |   |          |          |          |   |          |         |          |   |          |         |          |   |          |          |          |   |          |          |          |   |          |         |          |   |          |         |         |   |          |         |         |   |         |         |         |   |          |         |         |   |          |         |         |   |         |         |         |   |          |         |         |   |          |         |         |   |         |         |         |   |          |         |          |   |          |         |          |   |          |         |         |   |         |         |          |   |         |          |          |   |         |          |          |   |         |          |          |   |         |          |         |   |         |         |         |   |         |         |         |   |          |         |         |   |          |         |         |   |          |         |          |   |          |         |          |                                                                                                                                                                                                                       |                                                                                                                                                                                                                                                                                                                                                                                                                                                                                                                                                                                                                                                                                                                                                                                                                                                                                                                                                                                                                                                                                                                                                                                                                                                                                                                                                                                                                                                                                                                                                                                                                                                                                                                                                                                                                                                                                                                                                                                                                                                                                                                                                                                                                                                                                |         |          |          |          |         |          |          |          |          |          |          |          |          |         |          |          |          |          |         |          |          |         |          |          |          |         |          |          |          |          |         |          |          |          |         |         |          |          |         |          |          |          |                                                                                                                                                                                                                        |                                                                                                                                                                                                                                                                                                                                                                                                                                                                                                                                                                                                                                                                                                                                                                                                                                                                                                                                                                                                                                                                                                                                                                                                                                                                                                                                                                                                                                                                                                                                                                                                                                                                                                                                                                                                                                                                                                                                                                                                                                                                                                                                                                                                                                                                                                                                                                                                                                                                                                                                                                                                                                                                                                                                                                                                                                                                                                                                                                                                                                                                                      |   |          |          |          |   |          |         |          |   |          |          |          |   |          |         |          |   |          |         |          |   |          |          |          |   |          |          |          |   |         |         |          |   |          |         |          |   |          |         |          |   |          |         |          |   |          |          |         |   |          |          |         |   |         |          |         |   |          |          |         |   |         |          |         |   |         |          |          |   |          |          |          |   |          |          |          |   |          |         |          |   |         |          |          |   |         |          |          |   |         |          |          |   |         |          |          |   |         |          |          |   |         |          |          |   |         |          |          |   |         |          |          |   |         |         |          |   |         |         |          |   |         |         |          |   |         |         |          |   |         |         |          |   |          |          |         |   |          |         |         |   |          |         |         |   |          |         |         |   |          |         |         |   |          |          |         |   |          |          |         |   |          |          |         |   |          |          |         |
| H                                                                                                                                                                                                                     | 0.33783                                                                                                                                                                                                                                                                                                                                                                                                                                                                                                                                                                                                                                                                                                                                                                                                                                                                                                                                                                                                                                                                                                                                                                                                                                                                                                                                                                                                                                                                                                                                                                                                                                                                                                                                                                                                                                                                                                                                                                                                                                                                                                                                                                                                                                                                                                                                                                                                                                                                                                                                                                                                                                                                                                                                                                                                                                                                                                                                                                                                                                                                            | 3.88255  | 1.14562  |         |          |   |          |         |          |   |          |          |          |   |          |         |          |   |          |         |          |   |          |          |          |   |          |          |          |   |          |         |          |   |          |         |         |   |          |         |         |   |         |         |         |   |          |         |         |   |          |         |         |   |         |         |         |   |          |         |         |   |          |         |         |   |         |         |         |   |          |         |          |   |          |         |          |   |          |         |         |   |         |         |          |   |         |          |          |   |         |          |          |   |         |          |          |   |         |          |         |   |         |         |         |   |         |         |         |   |          |         |         |   |          |         |         |   |          |         |          |   |          |         |          |                                                                                                                                                                                                                       |                                                                                                                                                                                                                                                                                                                                                                                                                                                                                                                                                                                                                                                                                                                                                                                                                                                                                                                                                                                                                                                                                                                                                                                                                                                                                                                                                                                                                                                                                                                                                                                                                                                                                                                                                                                                                                                                                                                                                                                                                                                                                                                                                                                                                                                                                |         |          |          |          |         |          |          |          |          |          |          |          |          |         |          |          |          |          |         |          |          |         |          |          |          |         |          |          |          |          |         |          |          |          |         |         |          |          |         |          |          |          |                                                                                                                                                                                                                        |                                                                                                                                                                                                                                                                                                                                                                                                                                                                                                                                                                                                                                                                                                                                                                                                                                                                                                                                                                                                                                                                                                                                                                                                                                                                                                                                                                                                                                                                                                                                                                                                                                                                                                                                                                                                                                                                                                                                                                                                                                                                                                                                                                                                                                                                                                                                                                                                                                                                                                                                                                                                                                                                                                                                                                                                                                                                                                                                                                                                                                                                                      |   |          |          |          |   |          |         |          |   |          |          |          |   |          |         |          |   |          |         |          |   |          |          |          |   |          |          |          |   |         |         |          |   |          |         |          |   |          |         |          |   |          |         |          |   |          |          |         |   |          |          |         |   |         |          |         |   |          |          |         |   |         |          |         |   |         |          |          |   |          |          |          |   |          |          |          |   |          |         |          |   |         |          |          |   |         |          |          |   |         |          |          |   |         |          |          |   |         |          |          |   |         |          |          |   |         |          |          |   |         |          |          |   |         |         |          |   |         |         |          |   |         |         |          |   |         |         |          |   |         |         |          |   |          |          |         |   |          |         |         |   |          |         |         |   |          |         |         |   |          |         |         |   |          |          |         |   |          |          |         |   |          |          |         |   |          |          |         |
| H                                                                                                                                                                                                                     | 0.69492                                                                                                                                                                                                                                                                                                                                                                                                                                                                                                                                                                                                                                                                                                                                                                                                                                                                                                                                                                                                                                                                                                                                                                                                                                                                                                                                                                                                                                                                                                                                                                                                                                                                                                                                                                                                                                                                                                                                                                                                                                                                                                                                                                                                                                                                                                                                                                                                                                                                                                                                                                                                                                                                                                                                                                                                                                                                                                                                                                                                                                                                            | 0.32547  | -4.23391 |         |          |   |          |         |          |   |          |          |          |   |          |         |          |   |          |         |          |   |          |          |          |   |          |          |          |   |          |         |          |   |          |         |         |   |          |         |         |   |         |         |         |   |          |         |         |   |          |         |         |   |         |         |         |   |          |         |         |   |          |         |         |   |         |         |         |   |          |         |          |   |          |         |          |   |          |         |         |   |         |         |          |   |         |          |          |   |         |          |          |   |         |          |          |   |         |          |         |   |         |         |         |   |         |         |         |   |          |         |         |   |          |         |         |   |          |         |          |   |          |         |          |                                                                                                                                                                                                                       |                                                                                                                                                                                                                                                                                                                                                                                                                                                                                                                                                                                                                                                                                                                                                                                                                                                                                                                                                                                                                                                                                                                                                                                                                                                                                                                                                                                                                                                                                                                                                                                                                                                                                                                                                                                                                                                                                                                                                                                                                                                                                                                                                                                                                                                                                |         |          |          |          |         |          |          |          |          |          |          |          |          |         |          |          |          |          |         |          |          |         |          |          |          |         |          |          |          |          |         |          |          |          |         |         |          |          |         |          |          |          |                                                                                                                                                                                                                        |                                                                                                                                                                                                                                                                                                                                                                                                                                                                                                                                                                                                                                                                                                                                                                                                                                                                                                                                                                                                                                                                                                                                                                                                                                                                                                                                                                                                                                                                                                                                                                                                                                                                                                                                                                                                                                                                                                                                                                                                                                                                                                                                                                                                                                                                                                                                                                                                                                                                                                                                                                                                                                                                                                                                                                                                                                                                                                                                                                                                                                                                                      |   |          |          |          |   |          |         |          |   |          |          |          |   |          |         |          |   |          |         |          |   |          |          |          |   |          |          |          |   |         |         |          |   |          |         |          |   |          |         |          |   |          |         |          |   |          |          |         |   |          |          |         |   |         |          |         |   |          |          |         |   |         |          |         |   |         |          |          |   |          |          |          |   |          |          |          |   |          |         |          |   |         |          |          |   |         |          |          |   |         |          |          |   |         |          |          |   |         |          |          |   |         |          |          |   |         |          |          |   |         |          |          |   |         |         |          |   |         |         |          |   |         |         |          |   |         |         |          |   |         |         |          |   |          |          |         |   |          |         |         |   |          |         |         |   |          |         |         |   |          |         |         |   |          |          |         |   |          |          |         |   |          |          |         |   |          |          |         |
| H                                                                                                                                                                                                                     | 0.41698                                                                                                                                                                                                                                                                                                                                                                                                                                                                                                                                                                                                                                                                                                                                                                                                                                                                                                                                                                                                                                                                                                                                                                                                                                                                                                                                                                                                                                                                                                                                                                                                                                                                                                                                                                                                                                                                                                                                                                                                                                                                                                                                                                                                                                                                                                                                                                                                                                                                                                                                                                                                                                                                                                                                                                                                                                                                                                                                                                                                                                                                            | -2.15851 | -4.32969 |         |          |   |          |         |          |   |          |          |          |   |          |         |          |   |          |         |          |   |          |          |          |   |          |          |          |   |          |         |          |   |          |         |         |   |          |         |         |   |         |         |         |   |          |         |         |   |          |         |         |   |         |         |         |   |          |         |         |   |          |         |         |   |         |         |         |   |          |         |          |   |          |         |          |   |          |         |         |   |         |         |          |   |         |          |          |   |         |          |          |   |         |          |          |   |         |          |         |   |         |         |         |   |         |         |         |   |          |         |         |   |          |         |         |   |          |         |          |   |          |         |          |                                                                                                                                                                                                                       |                                                                                                                                                                                                                                                                                                                                                                                                                                                                                                                                                                                                                                                                                                                                                                                                                                                                                                                                                                                                                                                                                                                                                                                                                                                                                                                                                                                                                                                                                                                                                                                                                                                                                                                                                                                                                                                                                                                                                                                                                                                                                                                                                                                                                                                                                |         |          |          |          |         |          |          |          |          |          |          |          |          |         |          |          |          |          |         |          |          |         |          |          |          |         |          |          |          |          |         |          |          |          |         |         |          |          |         |          |          |          |                                                                                                                                                                                                                        |                                                                                                                                                                                                                                                                                                                                                                                                                                                                                                                                                                                                                                                                                                                                                                                                                                                                                                                                                                                                                                                                                                                                                                                                                                                                                                                                                                                                                                                                                                                                                                                                                                                                                                                                                                                                                                                                                                                                                                                                                                                                                                                                                                                                                                                                                                                                                                                                                                                                                                                                                                                                                                                                                                                                                                                                                                                                                                                                                                                                                                                                                      |   |          |          |          |   |          |         |          |   |          |          |          |   |          |         |          |   |          |         |          |   |          |          |          |   |          |          |          |   |         |         |          |   |          |         |          |   |          |         |          |   |          |         |          |   |          |          |         |   |          |          |         |   |         |          |         |   |          |          |         |   |         |          |         |   |         |          |          |   |          |          |          |   |          |          |          |   |          |         |          |   |         |          |          |   |         |          |          |   |         |          |          |   |         |          |          |   |         |          |          |   |         |          |          |   |         |          |          |   |         |          |          |   |         |         |          |   |         |         |          |   |         |         |          |   |         |         |          |   |         |         |          |   |          |          |         |   |          |         |         |   |          |         |         |   |          |         |         |   |          |         |         |   |          |          |         |   |          |          |         |   |          |          |         |   |          |          |         |
| H                                                                                                                                                                                                                     | 1.00594                                                                                                                                                                                                                                                                                                                                                                                                                                                                                                                                                                                                                                                                                                                                                                                                                                                                                                                                                                                                                                                                                                                                                                                                                                                                                                                                                                                                                                                                                                                                                                                                                                                                                                                                                                                                                                                                                                                                                                                                                                                                                                                                                                                                                                                                                                                                                                                                                                                                                                                                                                                                                                                                                                                                                                                                                                                                                                                                                                                                                                                                            | 2.95061  | 3.36658  |         |          |   |          |         |          |   |          |          |          |   |          |         |          |   |          |         |          |   |          |          |          |   |          |          |          |   |          |         |          |   |          |         |         |   |          |         |         |   |         |         |         |   |          |         |         |   |          |         |         |   |         |         |         |   |          |         |         |   |          |         |         |   |         |         |         |   |          |         |          |   |          |         |          |   |          |         |         |   |         |         |          |   |         |          |          |   |         |          |          |   |         |          |          |   |         |          |         |   |         |         |         |   |         |         |         |   |          |         |         |   |          |         |         |   |          |         |          |   |          |         |          |                                                                                                                                                                                                                       |                                                                                                                                                                                                                                                                                                                                                                                                                                                                                                                                                                                                                                                                                                                                                                                                                                                                                                                                                                                                                                                                                                                                                                                                                                                                                                                                                                                                                                                                                                                                                                                                                                                                                                                                                                                                                                                                                                                                                                                                                                                                                                                                                                                                                                                                                |         |          |          |          |         |          |          |          |          |          |          |          |          |         |          |          |          |          |         |          |          |         |          |          |          |         |          |          |          |          |         |          |          |          |         |         |          |          |         |          |          |          |                                                                                                                                                                                                                        |                                                                                                                                                                                                                                                                                                                                                                                                                                                                                                                                                                                                                                                                                                                                                                                                                                                                                                                                                                                                                                                                                                                                                                                                                                                                                                                                                                                                                                                                                                                                                                                                                                                                                                                                                                                                                                                                                                                                                                                                                                                                                                                                                                                                                                                                                                                                                                                                                                                                                                                                                                                                                                                                                                                                                                                                                                                                                                                                                                                                                                                                                      |   |          |          |          |   |          |         |          |   |          |          |          |   |          |         |          |   |          |         |          |   |          |          |          |   |          |          |          |   |         |         |          |   |          |         |          |   |          |         |          |   |          |         |          |   |          |          |         |   |          |          |         |   |         |          |         |   |          |          |         |   |         |          |         |   |         |          |          |   |          |          |          |   |          |          |          |   |          |         |          |   |         |          |          |   |         |          |          |   |         |          |          |   |         |          |          |   |         |          |          |   |         |          |          |   |         |          |          |   |         |          |          |   |         |         |          |   |         |         |          |   |         |         |          |   |         |         |          |   |         |         |          |   |          |          |         |   |          |         |         |   |          |         |         |   |          |         |         |   |          |         |         |   |          |          |         |   |          |          |         |   |          |          |         |   |          |          |         |
| C                                                                                                                                                                                                                     | -0.59717                                                                                                                                                                                                                                                                                                                                                                                                                                                                                                                                                                                                                                                                                                                                                                                                                                                                                                                                                                                                                                                                                                                                                                                                                                                                                                                                                                                                                                                                                                                                                                                                                                                                                                                                                                                                                                                                                                                                                                                                                                                                                                                                                                                                                                                                                                                                                                                                                                                                                                                                                                                                                                                                                                                                                                                                                                                                                                                                                                                                                                                                           | 2.71820  | -0.88450 |         |          |   |          |         |          |   |          |          |          |   |          |         |          |   |          |         |          |   |          |          |          |   |          |          |          |   |          |         |          |   |          |         |         |   |          |         |         |   |         |         |         |   |          |         |         |   |          |         |         |   |         |         |         |   |          |         |         |   |          |         |         |   |         |         |         |   |          |         |          |   |          |         |          |   |          |         |         |   |         |         |          |   |         |          |          |   |         |          |          |   |         |          |          |   |         |          |         |   |         |         |         |   |         |         |         |   |          |         |         |   |          |         |         |   |          |         |          |   |          |         |          |                                                                                                                                                                                                                       |                                                                                                                                                                                                                                                                                                                                                                                                                                                                                                                                                                                                                                                                                                                                                                                                                                                                                                                                                                                                                                                                                                                                                                                                                                                                                                                                                                                                                                                                                                                                                                                                                                                                                                                                                                                                                                                                                                                                                                                                                                                                                                                                                                                                                                                                                |         |          |          |          |         |          |          |          |          |          |          |          |          |         |          |          |          |          |         |          |          |         |          |          |          |         |          |          |          |          |         |          |          |          |         |         |          |          |         |          |          |          |                                                                                                                                                                                                                        |                                                                                                                                                                                                                                                                                                                                                                                                                                                                                                                                                                                                                                                                                                                                                                                                                                                                                                                                                                                                                                                                                                                                                                                                                                                                                                                                                                                                                                                                                                                                                                                                                                                                                                                                                                                                                                                                                                                                                                                                                                                                                                                                                                                                                                                                                                                                                                                                                                                                                                                                                                                                                                                                                                                                                                                                                                                                                                                                                                                                                                                                                      |   |          |          |          |   |          |         |          |   |          |          |          |   |          |         |          |   |          |         |          |   |          |          |          |   |          |          |          |   |         |         |          |   |          |         |          |   |          |         |          |   |          |         |          |   |          |          |         |   |          |          |         |   |         |          |         |   |          |          |         |   |         |          |         |   |         |          |          |   |          |          |          |   |          |          |          |   |          |         |          |   |         |          |          |   |         |          |          |   |         |          |          |   |         |          |          |   |         |          |          |   |         |          |          |   |         |          |          |   |         |          |          |   |         |         |          |   |         |         |          |   |         |         |          |   |         |         |          |   |         |         |          |   |          |          |         |   |          |         |         |   |          |         |         |   |          |         |         |   |          |         |         |   |          |          |         |   |          |          |         |   |          |          |         |   |          |          |         |
| O                                                                                                                                                                                                                     | -1.76117                                                                                                                                                                                                                                                                                                                                                                                                                                                                                                                                                                                                                                                                                                                                                                                                                                                                                                                                                                                                                                                                                                                                                                                                                                                                                                                                                                                                                                                                                                                                                                                                                                                                                                                                                                                                                                                                                                                                                                                                                                                                                                                                                                                                                                                                                                                                                                                                                                                                                                                                                                                                                                                                                                                                                                                                                                                                                                                                                                                                                                                                           | 2.15440  | -1.27520 |         |          |   |          |         |          |   |          |          |          |   |          |         |          |   |          |         |          |   |          |          |          |   |          |          |          |   |          |         |          |   |          |         |         |   |          |         |         |   |         |         |         |   |          |         |         |   |          |         |         |   |         |         |         |   |          |         |         |   |          |         |         |   |         |         |         |   |          |         |          |   |          |         |          |   |          |         |         |   |         |         |          |   |         |          |          |   |         |          |          |   |         |          |          |   |         |          |         |   |         |         |         |   |         |         |         |   |          |         |         |   |          |         |         |   |          |         |          |   |          |         |          |                                                                                                                                                                                                                       |                                                                                                                                                                                                                                                                                                                                                                                                                                                                                                                                                                                                                                                                                                                                                                                                                                                                                                                                                                                                                                                                                                                                                                                                                                                                                                                                                                                                                                                                                                                                                                                                                                                                                                                                                                                                                                                                                                                                                                                                                                                                                                                                                                                                                                                                                |         |          |          |          |         |          |          |          |          |          |          |          |          |         |          |          |          |          |         |          |          |         |          |          |          |         |          |          |          |          |         |          |          |          |         |         |          |          |         |          |          |          |                                                                                                                                                                                                                        |                                                                                                                                                                                                                                                                                                                                                                                                                                                                                                                                                                                                                                                                                                                                                                                                                                                                                                                                                                                                                                                                                                                                                                                                                                                                                                                                                                                                                                                                                                                                                                                                                                                                                                                                                                                                                                                                                                                                                                                                                                                                                                                                                                                                                                                                                                                                                                                                                                                                                                                                                                                                                                                                                                                                                                                                                                                                                                                                                                                                                                                                                      |   |          |          |          |   |          |         |          |   |          |          |          |   |          |         |          |   |          |         |          |   |          |          |          |   |          |          |          |   |         |         |          |   |          |         |          |   |          |         |          |   |          |         |          |   |          |          |         |   |          |          |         |   |         |          |         |   |          |          |         |   |         |          |         |   |         |          |          |   |          |          |          |   |          |          |          |   |          |         |          |   |         |          |          |   |         |          |          |   |         |          |          |   |         |          |          |   |         |          |          |   |         |          |          |   |         |          |          |   |         |          |          |   |         |         |          |   |         |         |          |   |         |         |          |   |         |         |          |   |         |         |          |   |          |          |         |   |          |         |         |   |          |         |         |   |          |         |         |   |          |         |         |   |          |          |         |   |          |          |         |   |          |          |         |   |          |          |         |
| O                                                                                                                                                                                                                     | -0.19027                                                                                                                                                                                                                                                                                                                                                                                                                                                                                                                                                                                                                                                                                                                                                                                                                                                                                                                                                                                                                                                                                                                                                                                                                                                                                                                                                                                                                                                                                                                                                                                                                                                                                                                                                                                                                                                                                                                                                                                                                                                                                                                                                                                                                                                                                                                                                                                                                                                                                                                                                                                                                                                                                                                                                                                                                                                                                                                                                                                                                                                                           | 3.75816  | -1.34085 |         |          |   |          |         |          |   |          |          |          |   |          |         |          |   |          |         |          |   |          |          |          |   |          |          |          |   |          |         |          |   |          |         |         |   |          |         |         |   |         |         |         |   |          |         |         |   |          |         |         |   |         |         |         |   |          |         |         |   |          |         |         |   |         |         |         |   |          |         |          |   |          |         |          |   |          |         |         |   |         |         |          |   |         |          |          |   |         |          |          |   |         |          |          |   |         |          |         |   |         |         |         |   |         |         |         |   |          |         |         |   |          |         |         |   |          |         |          |   |          |         |          |                                                                                                                                                                                                                       |                                                                                                                                                                                                                                                                                                                                                                                                                                                                                                                                                                                                                                                                                                                                                                                                                                                                                                                                                                                                                                                                                                                                                                                                                                                                                                                                                                                                                                                                                                                                                                                                                                                                                                                                                                                                                                                                                                                                                                                                                                                                                                                                                                                                                                                                                |         |          |          |          |         |          |          |          |          |          |          |          |          |         |          |          |          |          |         |          |          |         |          |          |          |         |          |          |          |          |         |          |          |          |         |         |          |          |         |          |          |          |                                                                                                                                                                                                                        |                                                                                                                                                                                                                                                                                                                                                                                                                                                                                                                                                                                                                                                                                                                                                                                                                                                                                                                                                                                                                                                                                                                                                                                                                                                                                                                                                                                                                                                                                                                                                                                                                                                                                                                                                                                                                                                                                                                                                                                                                                                                                                                                                                                                                                                                                                                                                                                                                                                                                                                                                                                                                                                                                                                                                                                                                                                                                                                                                                                                                                                                                      |   |          |          |          |   |          |         |          |   |          |          |          |   |          |         |          |   |          |         |          |   |          |          |          |   |          |          |          |   |         |         |          |   |          |         |          |   |          |         |          |   |          |         |          |   |          |          |         |   |          |          |         |   |         |          |         |   |          |          |         |   |         |          |         |   |         |          |          |   |          |          |          |   |          |          |          |   |          |         |          |   |         |          |          |   |         |          |          |   |         |          |          |   |         |          |          |   |         |          |          |   |         |          |          |   |         |          |          |   |         |          |          |   |         |         |          |   |         |         |          |   |         |         |          |   |         |         |          |   |         |         |          |   |          |          |         |   |          |         |         |   |          |         |         |   |          |         |         |   |          |         |         |   |          |          |         |   |          |          |         |   |          |          |         |   |          |          |         |
| N                                                                                                                                                                                                                     | -0.27169                                                                                                                                                                                                                                                                                                                                                                                                                                                                                                                                                                                                                                                                                                                                                                                                                                                                                                                                                                                                                                                                                                                                                                                                                                                                                                                                                                                                                                                                                                                                                                                                                                                                                                                                                                                                                                                                                                                                                                                                                                                                                                                                                                                                                                                                                                                                                                                                                                                                                                                                                                                                                                                                                                                                                                                                                                                                                                                                                                                                                                                                           | -1.20405 | 2.19415  |         |          |   |          |         |          |   |          |          |          |   |          |         |          |   |          |         |          |   |          |          |          |   |          |          |          |   |          |         |          |   |          |         |         |   |          |         |         |   |         |         |         |   |          |         |         |   |          |         |         |   |         |         |         |   |          |         |         |   |          |         |         |   |         |         |         |   |          |         |          |   |          |         |          |   |          |         |         |   |         |         |          |   |         |          |          |   |         |          |          |   |         |          |          |   |         |          |         |   |         |         |         |   |         |         |         |   |          |         |         |   |          |         |         |   |          |         |          |   |          |         |          |                                                                                                                                                                                                                       |                                                                                                                                                                                                                                                                                                                                                                                                                                                                                                                                                                                                                                                                                                                                                                                                                                                                                                                                                                                                                                                                                                                                                                                                                                                                                                                                                                                                                                                                                                                                                                                                                                                                                                                                                                                                                                                                                                                                                                                                                                                                                                                                                                                                                                                                                |         |          |          |          |         |          |          |          |          |          |          |          |          |         |          |          |          |          |         |          |          |         |          |          |          |         |          |          |          |          |         |          |          |          |         |         |          |          |         |          |          |          |                                                                                                                                                                                                                        |                                                                                                                                                                                                                                                                                                                                                                                                                                                                                                                                                                                                                                                                                                                                                                                                                                                                                                                                                                                                                                                                                                                                                                                                                                                                                                                                                                                                                                                                                                                                                                                                                                                                                                                                                                                                                                                                                                                                                                                                                                                                                                                                                                                                                                                                                                                                                                                                                                                                                                                                                                                                                                                                                                                                                                                                                                                                                                                                                                                                                                                                                      |   |          |          |          |   |          |         |          |   |          |          |          |   |          |         |          |   |          |         |          |   |          |          |          |   |          |          |          |   |         |         |          |   |          |         |          |   |          |         |          |   |          |         |          |   |          |          |         |   |          |          |         |   |         |          |         |   |          |          |         |   |         |          |         |   |         |          |          |   |          |          |          |   |          |          |          |   |          |         |          |   |         |          |          |   |         |          |          |   |         |          |          |   |         |          |          |   |         |          |          |   |         |          |          |   |         |          |          |   |         |          |          |   |         |         |          |   |         |         |          |   |         |         |          |   |         |         |          |   |         |         |          |   |          |          |         |   |          |         |         |   |          |         |         |   |          |         |         |   |          |         |         |   |          |          |         |   |          |          |         |   |          |          |         |   |          |          |         |
| O                                                                                                                                                                                                                     | -1.43163                                                                                                                                                                                                                                                                                                                                                                                                                                                                                                                                                                                                                                                                                                                                                                                                                                                                                                                                                                                                                                                                                                                                                                                                                                                                                                                                                                                                                                                                                                                                                                                                                                                                                                                                                                                                                                                                                                                                                                                                                                                                                                                                                                                                                                                                                                                                                                                                                                                                                                                                                                                                                                                                                                                                                                                                                                                                                                                                                                                                                                                                           | -1.47067 | 1.93358  |         |          |   |          |         |          |   |          |          |          |   |          |         |          |   |          |         |          |   |          |          |          |   |          |          |          |   |          |         |          |   |          |         |         |   |          |         |         |   |         |         |         |   |          |         |         |   |          |         |         |   |         |         |         |   |          |         |         |   |          |         |         |   |         |         |         |   |          |         |          |   |          |         |          |   |          |         |         |   |         |         |          |   |         |          |          |   |         |          |          |   |         |          |          |   |         |          |         |   |         |         |         |   |         |         |         |   |          |         |         |   |          |         |         |   |          |         |          |   |          |         |          |                                                                                                                                                                                                                       |                                                                                                                                                                                                                                                                                                                                                                                                                                                                                                                                                                                                                                                                                                                                                                                                                                                                                                                                                                                                                                                                                                                                                                                                                                                                                                                                                                                                                                                                                                                                                                                                                                                                                                                                                                                                                                                                                                                                                                                                                                                                                                                                                                                                                                                                                |         |          |          |          |         |          |          |          |          |          |          |          |          |         |          |          |          |          |         |          |          |         |          |          |          |         |          |          |          |          |         |          |          |          |         |         |          |          |         |          |          |          |                                                                                                                                                                                                                        |                                                                                                                                                                                                                                                                                                                                                                                                                                                                                                                                                                                                                                                                                                                                                                                                                                                                                                                                                                                                                                                                                                                                                                                                                                                                                                                                                                                                                                                                                                                                                                                                                                                                                                                                                                                                                                                                                                                                                                                                                                                                                                                                                                                                                                                                                                                                                                                                                                                                                                                                                                                                                                                                                                                                                                                                                                                                                                                                                                                                                                                                                      |   |          |          |          |   |          |         |          |   |          |          |          |   |          |         |          |   |          |         |          |   |          |          |          |   |          |          |          |   |         |         |          |   |          |         |          |   |          |         |          |   |          |         |          |   |          |          |         |   |          |          |         |   |         |          |         |   |          |          |         |   |         |          |         |   |         |          |          |   |          |          |          |   |          |          |          |   |          |         |          |   |         |          |          |   |         |          |          |   |         |          |          |   |         |          |          |   |         |          |          |   |         |          |          |   |         |          |          |   |         |          |          |   |         |         |          |   |         |         |          |   |         |         |          |   |         |         |          |   |         |         |          |   |          |          |         |   |          |         |         |   |          |         |         |   |          |         |         |   |          |         |         |   |          |          |         |   |          |          |         |   |          |          |         |   |          |          |         |
| O                                                                                                                                                                                                                     | 0.45547                                                                                                                                                                                                                                                                                                                                                                                                                                                                                                                                                                                                                                                                                                                                                                                                                                                                                                                                                                                                                                                                                                                                                                                                                                                                                                                                                                                                                                                                                                                                                                                                                                                                                                                                                                                                                                                                                                                                                                                                                                                                                                                                                                                                                                                                                                                                                                                                                                                                                                                                                                                                                                                                                                                                                                                                                                                                                                                                                                                                                                                                            | -1.85954 | 2.92088  |         |          |   |          |         |          |   |          |          |          |   |          |         |          |   |          |         |          |   |          |          |          |   |          |          |          |   |          |         |          |   |          |         |         |   |          |         |         |   |         |         |         |   |          |         |         |   |          |         |         |   |         |         |         |   |          |         |         |   |          |         |         |   |         |         |         |   |          |         |          |   |          |         |          |   |          |         |         |   |         |         |          |   |         |          |          |   |         |          |          |   |         |          |          |   |         |          |         |   |         |         |         |   |         |         |         |   |          |         |         |   |          |         |         |   |          |         |          |   |          |         |          |                                                                                                                                                                                                                       |                                                                                                                                                                                                                                                                                                                                                                                                                                                                                                                                                                                                                                                                                                                                                                                                                                                                                                                                                                                                                                                                                                                                                                                                                                                                                                                                                                                                                                                                                                                                                                                                                                                                                                                                                                                                                                                                                                                                                                                                                                                                                                                                                                                                                                                                                |         |          |          |          |         |          |          |          |          |          |          |          |          |         |          |          |          |          |         |          |          |         |          |          |          |         |          |          |          |          |         |          |          |          |         |         |          |          |         |          |          |          |                                                                                                                                                                                                                        |                                                                                                                                                                                                                                                                                                                                                                                                                                                                                                                                                                                                                                                                                                                                                                                                                                                                                                                                                                                                                                                                                                                                                                                                                                                                                                                                                                                                                                                                                                                                                                                                                                                                                                                                                                                                                                                                                                                                                                                                                                                                                                                                                                                                                                                                                                                                                                                                                                                                                                                                                                                                                                                                                                                                                                                                                                                                                                                                                                                                                                                                                      |   |          |          |          |   |          |         |          |   |          |          |          |   |          |         |          |   |          |         |          |   |          |          |          |   |          |          |          |   |         |         |          |   |          |         |          |   |          |         |          |   |          |         |          |   |          |          |         |   |          |          |         |   |         |          |         |   |          |          |         |   |         |          |         |   |         |          |          |   |          |          |          |   |          |          |          |   |          |         |          |   |         |          |          |   |         |          |          |   |         |          |          |   |         |          |          |   |         |          |          |   |         |          |          |   |         |          |          |   |         |          |          |   |         |         |          |   |         |         |          |   |         |         |          |   |         |         |          |   |         |         |          |   |          |          |         |   |          |         |         |   |          |         |         |   |          |         |         |   |          |         |         |   |          |          |         |   |          |          |         |   |          |          |         |   |          |          |         |
| O                                                                                                                                                                                                                     | 0.34043                                                                                                                                                                                                                                                                                                                                                                                                                                                                                                                                                                                                                                                                                                                                                                                                                                                                                                                                                                                                                                                                                                                                                                                                                                                                                                                                                                                                                                                                                                                                                                                                                                                                                                                                                                                                                                                                                                                                                                                                                                                                                                                                                                                                                                                                                                                                                                                                                                                                                                                                                                                                                                                                                                                                                                                                                                                                                                                                                                                                                                                                            | -2.36720 | 0.18131  |         |          |   |          |         |          |   |          |          |          |   |          |         |          |   |          |         |          |   |          |          |          |   |          |          |          |   |          |         |          |   |          |         |         |   |          |         |         |   |         |         |         |   |          |         |         |   |          |         |         |   |         |         |         |   |          |         |         |   |          |         |         |   |         |         |         |   |          |         |          |   |          |         |          |   |          |         |         |   |         |         |          |   |         |          |          |   |         |          |          |   |         |          |          |   |         |          |         |   |         |         |         |   |         |         |         |   |          |         |         |   |          |         |         |   |          |         |          |   |          |         |          |                                                                                                                                                                                                                       |                                                                                                                                                                                                                                                                                                                                                                                                                                                                                                                                                                                                                                                                                                                                                                                                                                                                                                                                                                                                                                                                                                                                                                                                                                                                                                                                                                                                                                                                                                                                                                                                                                                                                                                                                                                                                                                                                                                                                                                                                                                                                                                                                                                                                                                                                |         |          |          |          |         |          |          |          |          |          |          |          |          |         |          |          |          |          |         |          |          |         |          |          |          |         |          |          |          |          |         |          |          |          |         |         |          |          |         |          |          |          |                                                                                                                                                                                                                        |                                                                                                                                                                                                                                                                                                                                                                                                                                                                                                                                                                                                                                                                                                                                                                                                                                                                                                                                                                                                                                                                                                                                                                                                                                                                                                                                                                                                                                                                                                                                                                                                                                                                                                                                                                                                                                                                                                                                                                                                                                                                                                                                                                                                                                                                                                                                                                                                                                                                                                                                                                                                                                                                                                                                                                                                                                                                                                                                                                                                                                                                                      |   |          |          |          |   |          |         |          |   |          |          |          |   |          |         |          |   |          |         |          |   |          |          |          |   |          |          |          |   |         |         |          |   |          |         |          |   |          |         |          |   |          |         |          |   |          |          |         |   |          |          |         |   |         |          |         |   |          |          |         |   |         |          |         |   |         |          |          |   |          |          |          |   |          |          |          |   |          |         |          |   |         |          |          |   |         |          |          |   |         |          |          |   |         |          |          |   |         |          |          |   |         |          |          |   |         |          |          |   |         |          |          |   |         |         |          |   |         |         |          |   |         |         |          |   |         |         |          |   |         |         |          |   |          |          |         |   |          |         |         |   |          |         |         |   |          |         |         |   |          |         |         |   |          |          |         |   |          |          |         |   |          |          |         |   |          |          |         |
| C                                                                                                                                                                                                                     | 0.24063                                                                                                                                                                                                                                                                                                                                                                                                                                                                                                                                                                                                                                                                                                                                                                                                                                                                                                                                                                                                                                                                                                                                                                                                                                                                                                                                                                                                                                                                                                                                                                                                                                                                                                                                                                                                                                                                                                                                                                                                                                                                                                                                                                                                                                                                                                                                                                                                                                                                                                                                                                                                                                                                                                                                                                                                                                                                                                                                                                                                                                                                            | -3.78296 | 0.21264  |         |          |   |          |         |          |   |          |          |          |   |          |         |          |   |          |         |          |   |          |          |          |   |          |          |          |   |          |         |          |   |          |         |         |   |          |         |         |   |         |         |         |   |          |         |         |   |          |         |         |   |         |         |         |   |          |         |         |   |          |         |         |   |         |         |         |   |          |         |          |   |          |         |          |   |          |         |         |   |         |         |          |   |         |          |          |   |         |          |          |   |         |          |          |   |         |          |         |   |         |         |         |   |         |         |         |   |          |         |         |   |          |         |         |   |          |         |          |   |          |         |          |                                                                                                                                                                                                                       |                                                                                                                                                                                                                                                                                                                                                                                                                                                                                                                                                                                                                                                                                                                                                                                                                                                                                                                                                                                                                                                                                                                                                                                                                                                                                                                                                                                                                                                                                                                                                                                                                                                                                                                                                                                                                                                                                                                                                                                                                                                                                                                                                                                                                                                                                |         |          |          |          |         |          |          |          |          |          |          |          |          |         |          |          |          |          |         |          |          |         |          |          |          |         |          |          |          |          |         |          |          |          |         |         |          |          |         |          |          |          |                                                                                                                                                                                                                        |                                                                                                                                                                                                                                                                                                                                                                                                                                                                                                                                                                                                                                                                                                                                                                                                                                                                                                                                                                                                                                                                                                                                                                                                                                                                                                                                                                                                                                                                                                                                                                                                                                                                                                                                                                                                                                                                                                                                                                                                                                                                                                                                                                                                                                                                                                                                                                                                                                                                                                                                                                                                                                                                                                                                                                                                                                                                                                                                                                                                                                                                                      |   |          |          |          |   |          |         |          |   |          |          |          |   |          |         |          |   |          |         |          |   |          |          |          |   |          |          |          |   |         |         |          |   |          |         |          |   |          |         |          |   |          |         |          |   |          |          |         |   |          |          |         |   |         |          |         |   |          |          |         |   |         |          |         |   |         |          |          |   |          |          |          |   |          |          |          |   |          |         |          |   |         |          |          |   |         |          |          |   |         |          |          |   |         |          |          |   |         |          |          |   |         |          |          |   |         |          |          |   |         |          |          |   |         |         |          |   |         |         |          |   |         |         |          |   |         |         |          |   |         |         |          |   |          |          |         |   |          |         |         |   |          |         |         |   |          |         |         |   |          |         |         |   |          |          |         |   |          |          |         |   |          |          |         |   |          |          |         |
| H                                                                                                                                                                                                                     | 1.08278                                                                                                                                                                                                                                                                                                                                                                                                                                                                                                                                                                                                                                                                                                                                                                                                                                                                                                                                                                                                                                                                                                                                                                                                                                                                                                                                                                                                                                                                                                                                                                                                                                                                                                                                                                                                                                                                                                                                                                                                                                                                                                                                                                                                                                                                                                                                                                                                                                                                                                                                                                                                                                                                                                                                                                                                                                                                                                                                                                                                                                                                            | -4.24335 | -0.31122 |         |          |   |          |         |          |   |          |          |          |   |          |         |          |   |          |         |          |   |          |          |          |   |          |          |          |   |          |         |          |   |          |         |         |   |          |         |         |   |         |         |         |   |          |         |         |   |          |         |         |   |         |         |         |   |          |         |         |   |          |         |         |   |         |         |         |   |          |         |          |   |          |         |          |   |          |         |         |   |         |         |          |   |         |          |          |   |         |          |          |   |         |          |          |   |         |          |         |   |         |         |         |   |         |         |         |   |          |         |         |   |          |         |         |   |          |         |          |   |          |         |          |                                                                                                                                                                                                                       |                                                                                                                                                                                                                                                                                                                                                                                                                                                                                                                                                                                                                                                                                                                                                                                                                                                                                                                                                                                                                                                                                                                                                                                                                                                                                                                                                                                                                                                                                                                                                                                                                                                                                                                                                                                                                                                                                                                                                                                                                                                                                                                                                                                                                                                                                |         |          |          |          |         |          |          |          |          |          |          |          |          |         |          |          |          |          |         |          |          |         |          |          |          |         |          |          |          |          |         |          |          |          |         |         |          |          |         |          |          |          |                                                                                                                                                                                                                        |                                                                                                                                                                                                                                                                                                                                                                                                                                                                                                                                                                                                                                                                                                                                                                                                                                                                                                                                                                                                                                                                                                                                                                                                                                                                                                                                                                                                                                                                                                                                                                                                                                                                                                                                                                                                                                                                                                                                                                                                                                                                                                                                                                                                                                                                                                                                                                                                                                                                                                                                                                                                                                                                                                                                                                                                                                                                                                                                                                                                                                                                                      |   |          |          |          |   |          |         |          |   |          |          |          |   |          |         |          |   |          |         |          |   |          |          |          |   |          |          |          |   |         |         |          |   |          |         |          |   |          |         |          |   |          |         |          |   |          |          |         |   |          |          |         |   |         |          |         |   |          |          |         |   |         |          |         |   |         |          |          |   |          |          |          |   |          |          |          |   |          |         |          |   |         |          |          |   |         |          |          |   |         |          |          |   |         |          |          |   |         |          |          |   |         |          |          |   |         |          |          |   |         |          |          |   |         |         |          |   |         |         |          |   |         |         |          |   |         |         |          |   |         |         |          |   |          |          |         |   |          |         |         |   |          |         |         |   |          |         |         |   |          |         |         |   |          |          |         |   |          |          |         |   |          |          |         |   |          |          |         |
| H                                                                                                                                                                                                                     | -0.69912                                                                                                                                                                                                                                                                                                                                                                                                                                                                                                                                                                                                                                                                                                                                                                                                                                                                                                                                                                                                                                                                                                                                                                                                                                                                                                                                                                                                                                                                                                                                                                                                                                                                                                                                                                                                                                                                                                                                                                                                                                                                                                                                                                                                                                                                                                                                                                                                                                                                                                                                                                                                                                                                                                                                                                                                                                                                                                                                                                                                                                                                           | -4.11370 | -0.23635 |         |          |   |          |         |          |   |          |          |          |   |          |         |          |   |          |         |          |   |          |          |          |   |          |          |          |   |          |         |          |   |          |         |         |   |          |         |         |   |         |         |         |   |          |         |         |   |          |         |         |   |         |         |         |   |          |         |         |   |          |         |         |   |         |         |         |   |          |         |          |   |          |         |          |   |          |         |         |   |         |         |          |   |         |          |          |   |         |          |          |   |         |          |          |   |         |          |         |   |         |         |         |   |         |         |         |   |          |         |         |   |          |         |         |   |          |         |          |   |          |         |          |                                                                                                                                                                                                                       |                                                                                                                                                                                                                                                                                                                                                                                                                                                                                                                                                                                                                                                                                                                                                                                                                                                                                                                                                                                                                                                                                                                                                                                                                                                                                                                                                                                                                                                                                                                                                                                                                                                                                                                                                                                                                                                                                                                                                                                                                                                                                                                                                                                                                                                                                |         |          |          |          |         |          |          |          |          |          |          |          |          |         |          |          |          |          |         |          |          |         |          |          |          |         |          |          |          |          |         |          |          |          |         |         |          |          |         |          |          |          |                                                                                                                                                                                                                        |                                                                                                                                                                                                                                                                                                                                                                                                                                                                                                                                                                                                                                                                                                                                                                                                                                                                                                                                                                                                                                                                                                                                                                                                                                                                                                                                                                                                                                                                                                                                                                                                                                                                                                                                                                                                                                                                                                                                                                                                                                                                                                                                                                                                                                                                                                                                                                                                                                                                                                                                                                                                                                                                                                                                                                                                                                                                                                                                                                                                                                                                                      |   |          |          |          |   |          |         |          |   |          |          |          |   |          |         |          |   |          |         |          |   |          |          |          |   |          |          |          |   |         |         |          |   |          |         |          |   |          |         |          |   |          |         |          |   |          |          |         |   |          |          |         |   |         |          |         |   |          |          |         |   |         |          |         |   |         |          |          |   |          |          |          |   |          |          |          |   |          |         |          |   |         |          |          |   |         |          |          |   |         |          |          |   |         |          |          |   |         |          |          |   |         |          |          |   |         |          |          |   |         |          |          |   |         |         |          |   |         |         |          |   |         |         |          |   |         |         |          |   |         |         |          |   |          |          |         |   |          |         |         |   |          |         |         |   |          |         |         |   |          |         |         |   |          |          |         |   |          |          |         |   |          |          |         |   |          |          |         |
| H                                                                                                                                                                                                                     | 0.26341                                                                                                                                                                                                                                                                                                                                                                                                                                                                                                                                                                                                                                                                                                                                                                                                                                                                                                                                                                                                                                                                                                                                                                                                                                                                                                                                                                                                                                                                                                                                                                                                                                                                                                                                                                                                                                                                                                                                                                                                                                                                                                                                                                                                                                                                                                                                                                                                                                                                                                                                                                                                                                                                                                                                                                                                                                                                                                                                                                                                                                                                            | -4.04693 | 1.26736  |         |          |   |          |         |          |   |          |          |          |   |          |         |          |   |          |         |          |   |          |          |          |   |          |          |          |   |          |         |          |   |          |         |         |   |          |         |         |   |         |         |         |   |          |         |         |   |          |         |         |   |         |         |         |   |          |         |         |   |          |         |         |   |         |         |         |   |          |         |          |   |          |         |          |   |          |         |         |   |         |         |          |   |         |          |          |   |         |          |          |   |         |          |          |   |         |          |         |   |         |         |         |   |         |         |         |   |          |         |         |   |          |         |         |   |          |         |          |   |          |         |          |                                                                                                                                                                                                                       |                                                                                                                                                                                                                                                                                                                                                                                                                                                                                                                                                                                                                                                                                                                                                                                                                                                                                                                                                                                                                                                                                                                                                                                                                                                                                                                                                                                                                                                                                                                                                                                                                                                                                                                                                                                                                                                                                                                                                                                                                                                                                                                                                                                                                                                                                |         |          |          |          |         |          |          |          |          |          |          |          |          |         |          |          |          |          |         |          |          |         |          |          |          |         |          |          |          |          |         |          |          |          |         |         |          |          |         |          |          |          |                                                                                                                                                                                                                        |                                                                                                                                                                                                                                                                                                                                                                                                                                                                                                                                                                                                                                                                                                                                                                                                                                                                                                                                                                                                                                                                                                                                                                                                                                                                                                                                                                                                                                                                                                                                                                                                                                                                                                                                                                                                                                                                                                                                                                                                                                                                                                                                                                                                                                                                                                                                                                                                                                                                                                                                                                                                                                                                                                                                                                                                                                                                                                                                                                                                                                                                                      |   |          |          |          |   |          |         |          |   |          |          |          |   |          |         |          |   |          |         |          |   |          |          |          |   |          |          |          |   |         |         |          |   |          |         |          |   |          |         |          |   |          |         |          |   |          |          |         |   |          |          |         |   |         |          |         |   |          |          |         |   |         |          |         |   |         |          |          |   |          |          |          |   |          |          |          |   |          |         |          |   |         |          |          |   |         |          |          |   |         |          |          |   |         |          |          |   |         |          |          |   |         |          |          |   |         |          |          |   |         |          |          |   |         |         |          |   |         |         |          |   |         |         |          |   |         |         |          |   |         |         |          |   |          |          |         |   |          |         |         |   |          |         |         |   |          |         |         |   |          |         |         |   |          |          |         |   |          |          |         |   |          |          |         |   |          |          |         |
| H                                                                                                                                                                                                                     | -2.12054                                                                                                                                                                                                                                                                                                                                                                                                                                                                                                                                                                                                                                                                                                                                                                                                                                                                                                                                                                                                                                                                                                                                                                                                                                                                                                                                                                                                                                                                                                                                                                                                                                                                                                                                                                                                                                                                                                                                                                                                                                                                                                                                                                                                                                                                                                                                                                                                                                                                                                                                                                                                                                                                                                                                                                                                                                                                                                                                                                                                                                                                           | 2.70042  | -1.98885 |         |          |   |          |         |          |   |          |          |          |   |          |         |          |   |          |         |          |   |          |          |          |   |          |          |          |   |          |         |          |   |          |         |         |   |          |         |         |   |         |         |         |   |          |         |         |   |          |         |         |   |         |         |         |   |          |         |         |   |          |         |         |   |         |         |         |   |          |         |          |   |          |         |          |   |          |         |         |   |         |         |          |   |         |          |          |   |         |          |          |   |         |          |          |   |         |          |         |   |         |         |         |   |         |         |         |   |          |         |         |   |          |         |         |   |          |         |          |   |          |         |          |                                                                                                                                                                                                                       |                                                                                                                                                                                                                                                                                                                                                                                                                                                                                                                                                                                                                                                                                                                                                                                                                                                                                                                                                                                                                                                                                                                                                                                                                                                                                                                                                                                                                                                                                                                                                                                                                                                                                                                                                                                                                                                                                                                                                                                                                                                                                                                                                                                                                                                                                |         |          |          |          |         |          |          |          |          |          |          |          |          |         |          |          |          |          |         |          |          |         |          |          |          |         |          |          |          |          |         |          |          |          |         |         |          |          |         |          |          |          |                                                                                                                                                                                                                        |                                                                                                                                                                                                                                                                                                                                                                                                                                                                                                                                                                                                                                                                                                                                                                                                                                                                                                                                                                                                                                                                                                                                                                                                                                                                                                                                                                                                                                                                                                                                                                                                                                                                                                                                                                                                                                                                                                                                                                                                                                                                                                                                                                                                                                                                                                                                                                                                                                                                                                                                                                                                                                                                                                                                                                                                                                                                                                                                                                                                                                                                                      |   |          |          |          |   |          |         |          |   |          |          |          |   |          |         |          |   |          |         |          |   |          |          |          |   |          |          |          |   |         |         |          |   |          |         |          |   |          |         |          |   |          |         |          |   |          |          |         |   |          |          |         |   |         |          |         |   |          |          |         |   |         |          |         |   |         |          |          |   |          |          |          |   |          |          |          |   |          |         |          |   |         |          |          |   |         |          |          |   |         |          |          |   |         |          |          |   |         |          |          |   |         |          |          |   |         |          |          |   |         |          |          |   |         |         |          |   |         |         |          |   |         |         |          |   |         |         |          |   |         |         |          |   |          |          |         |   |          |         |         |   |          |         |         |   |          |         |         |   |          |         |         |   |          |          |         |   |          |          |         |   |          |          |         |   |          |          |         |
|  <p><b>2f</b><br/>                     -770.7593707<br/>                     -770.6420523<br/>                     -771.3656017</p> | <table border="1"> <tbody> <tr><td>C</td><td>-1.70007</td><td>0.83189</td><td>-3.30666</td></tr> <tr><td>C</td><td>-1.06162</td><td>0.62193</td><td>-0.59446</td></tr> <tr><td>C</td><td>-1.35952</td><td>-0.39881</td><td>-2.75983</td></tr> <tr><td>C</td><td>-1.77053</td><td>1.95939</td><td>-2.49840</td></tr> <tr><td>C</td><td>-1.46036</td><td>1.83974</td><td>-1.15093</td></tr> <tr><td>C</td><td>-1.05099</td><td>-0.53758</td><td>-1.40003</td></tr> <tr><td>H</td><td>-1.35312</td><td>-1.26867</td><td>-3.39884</td></tr> <tr><td>H</td><td>-1.49282</td><td>2.71356</td><td>-0.51260</td></tr> <tr><td>C</td><td>-0.69469</td><td>0.64762</td><td>0.85506</td></tr> <tr><td>C</td><td>-0.35452</td><td>0.79971</td><td>3.65316</td></tr> <tr><td>C</td><td>0.59130</td><td>0.64296</td><td>1.42695</td></tr> <tr><td>C</td><td>-1.77797</td><td>0.77879</td><td>1.73662</td></tr> <tr><td>C</td><td>-1.62870</td><td>0.85470</td><td>3.11095</td></tr> <tr><td>C</td><td>0.74417</td><td>0.69903</td><td>2.81216</td></tr> <tr><td>H</td><td>-2.76809</td><td>0.81026</td><td>1.30286</td></tr> <tr><td>H</td><td>-2.49747</td><td>0.95204</td><td>3.74719</td></tr> <tr><td>H</td><td>1.71505</td><td>0.67953</td><td>3.27537</td></tr> <tr><td>H</td><td>-2.05868</td><td>2.91739</td><td>-2.90817</td></tr> <tr><td>H</td><td>-1.93401</td><td>0.89929</td><td>-4.36061</td></tr> <tr><td>H</td><td>-0.20111</td><td>0.84677</td><td>4.72202</td></tr> <tr><td>N</td><td>1.85925</td><td>0.54240</td><td>0.59645</td></tr> <tr><td>C</td><td>2.11434</td><td>-0.90674</td><td>0.26504</td></tr> <tr><td>H</td><td>2.98793</td><td>-0.95638</td><td>-0.38295</td></tr> <tr><td>H</td><td>1.22014</td><td>-1.30619</td><td>-0.21446</td></tr> <tr><td>H</td><td>2.30340</td><td>-1.42989</td><td>1.19947</td></tr> <tr><td>C</td><td>3.07107</td><td>1.06170</td><td>1.33001</td></tr> <tr><td>H</td><td>3.90165</td><td>1.04606</td><td>0.63009</td></tr> <tr><td>H</td><td>3.30556</td><td>0.41054</td><td>2.16393</td></tr> <tr><td>H</td><td>2.87324</td><td>2.07474</td><td>1.66886</td></tr> <tr><td>C</td><td>1.78831</td><td>1.34347</td><td>-0.68354</td></tr> <tr><td>H</td><td>2.77742</td><td>1.32463</td><td>-1.13381</td></tr> <tr><td>H</td><td>1.49716</td><td>2.35975</td><td>-0.43390</td></tr> <tr><td>H</td><td>1.06560</td><td>0.90034</td><td>-1.35293</td></tr> <tr><td>N</td><td>-0.68980</td><td>-1.79204</td><td>-0.85023</td></tr> <tr><td>C</td><td>-1.61652</td><td>-2.34340</td><td>0.14446</td></tr> <tr><td>H</td><td>-2.53821</td><td>-2.70327</td><td>-0.33180</td></tr> <tr><td>H</td><td>-1.87662</td><td>-1.59977</td><td>0.89030</td></tr> <tr><td>H</td><td>-1.13602</td><td>-3.18457</td><td>0.64638</td></tr> <tr><td>C</td><td>-0.28390</td><td>-2.82545</td><td>-1.79720</td></tr> <tr><td>H</td><td>0.16179</td><td>-3.64876</td><td>-1.23744</td></tr> <tr><td>H</td><td>0.45500</td><td>-2.42923</td><td>-2.49404</td></tr> <tr><td>H</td><td>-1.12702</td><td>-3.22748</td><td>-2.37450</td></tr> </tbody> </table> | C        | -1.70007 | 0.83189 | -3.30666 | C | -1.06162 | 0.62193 | -0.59446 | C | -1.35952 | -0.39881 | -2.75983 | C | -1.77053 | 1.95939 | -2.49840 | C | -1.46036 | 1.83974 | -1.15093 | C | -1.05099 | -0.53758 | -1.40003 | H | -1.35312 | -1.26867 | -3.39884 | H | -1.49282 | 2.71356 | -0.51260 | C | -0.69469 | 0.64762 | 0.85506 | C | -0.35452 | 0.79971 | 3.65316 | C | 0.59130 | 0.64296 | 1.42695 | C | -1.77797 | 0.77879 | 1.73662 | C | -1.62870 | 0.85470 | 3.11095 | C | 0.74417 | 0.69903 | 2.81216 | H | -2.76809 | 0.81026 | 1.30286 | H | -2.49747 | 0.95204 | 3.74719 | H | 1.71505 | 0.67953 | 3.27537 | H | -2.05868 | 2.91739 | -2.90817 | H | -1.93401 | 0.89929 | -4.36061 | H | -0.20111 | 0.84677 | 4.72202 | N | 1.85925 | 0.54240 | 0.59645  | C | 2.11434 | -0.90674 | 0.26504  | H | 2.98793 | -0.95638 | -0.38295 | H | 1.22014 | -1.30619 | -0.21446 | H | 2.30340 | -1.42989 | 1.19947 | C | 3.07107 | 1.06170 | 1.33001 | H | 3.90165 | 1.04606 | 0.63009 | H | 3.30556  | 0.41054 | 2.16393 | H | 2.87324  | 2.07474 | 1.66886 | C | 1.78831  | 1.34347 | -0.68354 | H | 2.77742  | 1.32463 | -1.13381 | H                                                                                                                                                                                                                     | 1.49716                                                                                                                                                                                                                                                                                                                                                                                                                                                                                                                                                                                                                                                                                                                                                                                                                                                                                                                                                                                                                                                                                                                                                                                                                                                                                                                                                                                                                                                                                                                                                                                                                                                                                                                                                                                                                                                                                                                                                                                                                                                                                                                                                                                                                                                                        | 2.35975 | -0.43390 | H        | 1.06560  | 0.90034 | -1.35293 | N        | -0.68980 | -1.79204 | -0.85023 | C        | -1.61652 | -2.34340 | 0.14446 | H        | -2.53821 | -2.70327 | -0.33180 | H       | -1.87662 | -1.59977 | 0.89030 | H        | -1.13602 | -3.18457 | 0.64638 | C        | -0.28390 | -2.82545 | -1.79720 | H       | 0.16179  | -3.64876 | -1.23744 | H       | 0.45500 | -2.42923 | -2.49404 | H       | -1.12702 | -3.22748 | -2.37450 |  <p><b>2f</b><br/>                     -770.7139419<br/>                     -770.5973848<br/>                     -771.3226472</p> | <table border="1"> <tbody> <tr><td>C</td><td>-2.63282</td><td>-0.12744</td><td>-2.59600</td></tr> <tr><td>C</td><td>-0.69935</td><td>0.11749</td><td>-0.47358</td></tr> <tr><td>C</td><td>-2.99277</td><td>-0.28997</td><td>-1.27141</td></tr> <tr><td>C</td><td>-1.33491</td><td>0.26285</td><td>-2.87186</td></tr> <tr><td>C</td><td>-0.42544</td><td>0.37100</td><td>-1.83334</td></tr> <tr><td>C</td><td>-2.10261</td><td>-0.11506</td><td>-0.20426</td></tr> <tr><td>H</td><td>-4.02453</td><td>-0.50786</td><td>-1.04350</td></tr> <tr><td>H</td><td>0.55211</td><td>0.65458</td><td>-2.14654</td></tr> <tr><td>C</td><td>0.40570</td><td>0.04780</td><td>0.57033</td></tr> <tr><td>C</td><td>2.19859</td><td>0.00150</td><td>2.85105</td></tr> <tr><td>C</td><td>1.84366</td><td>0.02598</td><td>0.43742</td></tr> <tr><td>C</td><td>0.00202</td><td>-0.06431</td><td>1.91943</td></tr> <tr><td>C</td><td>0.83458</td><td>-0.09339</td><td>3.02337</td></tr> <tr><td>C</td><td>2.67748</td><td>0.03800</td><td>1.55282</td></tr> <tr><td>H</td><td>-1.05045</td><td>-0.17230</td><td>2.09261</td></tr> <tr><td>H</td><td>0.39896</td><td>-0.18193</td><td>4.00924</td></tr> <tr><td>H</td><td>3.74524</td><td>0.06230</td><td>1.44079</td></tr> <tr><td>H</td><td>-1.01537</td><td>0.47439</td><td>-3.88305</td></tr> <tr><td>H</td><td>-3.36482</td><td>-0.25228</td><td>-3.38223</td></tr> <tr><td>H</td><td>2.88749</td><td>0.02063</td><td>3.68352</td></tr> <tr><td>N</td><td>2.60114</td><td>-0.02285</td><td>-0.88353</td></tr> <tr><td>C</td><td>2.10402</td><td>-1.19470</td><td>-1.72150</td></tr> <tr><td>H</td><td>2.43923</td><td>-1.04499</td><td>-2.74519</td></tr> <tr><td>H</td><td>1.03038</td><td>-1.28017</td><td>-1.68055</td></tr> <tr><td>H</td><td>2.55241</td><td>-2.09093</td><td>-1.30221</td></tr> <tr><td>C</td><td>4.08589</td><td>-0.32115</td><td>-0.76457</td></tr> <tr><td>H</td><td>4.45598</td><td>-0.41953</td><td>-1.78266</td></tr> <tr><td>H</td><td>4.22491</td><td>-1.24987</td><td>-0.22123</td></tr> <tr><td>H</td><td>4.60213</td><td>0.49654</td><td>-0.27492</td></tr> <tr><td>C</td><td>2.55341</td><td>1.34907</td><td>-1.54264</td></tr> <tr><td>H</td><td>2.72240</td><td>1.23447</td><td>-2.61134</td></tr> <tr><td>H</td><td>3.34311</td><td>1.94822</td><td>-1.09832</td></tr> <tr><td>H</td><td>1.60894</td><td>1.83491</td><td>-1.34310</td></tr> <tr><td>N</td><td>-2.66432</td><td>-0.11239</td><td>1.09615</td></tr> <tr><td>C</td><td>-2.81865</td><td>1.24069</td><td>1.64107</td></tr> <tr><td>H</td><td>-3.62248</td><td>1.78409</td><td>1.12750</td></tr> <tr><td>H</td><td>-1.89107</td><td>1.80081</td><td>1.52923</td></tr> <tr><td>H</td><td>-3.06031</td><td>1.17437</td><td>2.70337</td></tr> <tr><td>C</td><td>-3.85169</td><td>-0.92273</td><td>1.33750</td></tr> <tr><td>H</td><td>-3.97765</td><td>-1.02678</td><td>2.41618</td></tr> <tr><td>H</td><td>-3.72231</td><td>-1.91184</td><td>0.90089</td></tr> <tr><td>H</td><td>-4.77060</td><td>-0.47296</td><td>0.93621</td></tr> </tbody> </table> | C | -2.63282 | -0.12744 | -2.59600 | C | -0.69935 | 0.11749 | -0.47358 | C | -2.99277 | -0.28997 | -1.27141 | C | -1.33491 | 0.26285 | -2.87186 | C | -0.42544 | 0.37100 | -1.83334 | C | -2.10261 | -0.11506 | -0.20426 | H | -4.02453 | -0.50786 | -1.04350 | H | 0.55211 | 0.65458 | -2.14654 | C | 0.40570  | 0.04780 | 0.57033  | C | 2.19859  | 0.00150 | 2.85105  | C | 1.84366  | 0.02598 | 0.43742  | C | 0.00202  | -0.06431 | 1.91943 | C | 0.83458  | -0.09339 | 3.02337 | C | 2.67748 | 0.03800  | 1.55282 | H | -1.05045 | -0.17230 | 2.09261 | H | 0.39896 | -0.18193 | 4.00924 | H | 3.74524 | 0.06230  | 1.44079  | H | -1.01537 | 0.47439  | -3.88305 | H | -3.36482 | -0.25228 | -3.38223 | H | 2.88749  | 0.02063 | 3.68352  | N | 2.60114 | -0.02285 | -0.88353 | C | 2.10402 | -1.19470 | -1.72150 | H | 2.43923 | -1.04499 | -2.74519 | H | 1.03038 | -1.28017 | -1.68055 | H | 2.55241 | -2.09093 | -1.30221 | C | 4.08589 | -0.32115 | -0.76457 | H | 4.45598 | -0.41953 | -1.78266 | H | 4.22491 | -1.24987 | -0.22123 | H | 4.60213 | 0.49654 | -0.27492 | C | 2.55341 | 1.34907 | -1.54264 | H | 2.72240 | 1.23447 | -2.61134 | H | 3.34311 | 1.94822 | -1.09832 | H | 1.60894 | 1.83491 | -1.34310 | N | -2.66432 | -0.11239 | 1.09615 | C | -2.81865 | 1.24069 | 1.64107 | H | -3.62248 | 1.78409 | 1.12750 | H | -1.89107 | 1.80081 | 1.52923 | H | -3.06031 | 1.17437 | 2.70337 | C | -3.85169 | -0.92273 | 1.33750 | H | -3.97765 | -1.02678 | 2.41618 | H | -3.72231 | -1.91184 | 0.90089 | H | -4.77060 | -0.47296 | 0.93621 |
| C                                                                                                                                                                                                                     | -1.70007                                                                                                                                                                                                                                                                                                                                                                                                                                                                                                                                                                                                                                                                                                                                                                                                                                                                                                                                                                                                                                                                                                                                                                                                                                                                                                                                                                                                                                                                                                                                                                                                                                                                                                                                                                                                                                                                                                                                                                                                                                                                                                                                                                                                                                                                                                                                                                                                                                                                                                                                                                                                                                                                                                                                                                                                                                                                                                                                                                                                                                                                           | 0.83189  | -3.30666 |         |          |   |          |         |          |   |          |          |          |   |          |         |          |   |          |         |          |   |          |          |          |   |          |          |          |   |          |         |          |   |          |         |         |   |          |         |         |   |         |         |         |   |          |         |         |   |          |         |         |   |         |         |         |   |          |         |         |   |          |         |         |   |         |         |         |   |          |         |          |   |          |         |          |   |          |         |         |   |         |         |          |   |         |          |          |   |         |          |          |   |         |          |          |   |         |          |         |   |         |         |         |   |         |         |         |   |          |         |         |   |          |         |         |   |          |         |          |   |          |         |          |                                                                                                                                                                                                                       |                                                                                                                                                                                                                                                                                                                                                                                                                                                                                                                                                                                                                                                                                                                                                                                                                                                                                                                                                                                                                                                                                                                                                                                                                                                                                                                                                                                                                                                                                                                                                                                                                                                                                                                                                                                                                                                                                                                                                                                                                                                                                                                                                                                                                                                                                |         |          |          |          |         |          |          |          |          |          |          |          |          |         |          |          |          |          |         |          |          |         |          |          |          |         |          |          |          |          |         |          |          |          |         |         |          |          |         |          |          |          |                                                                                                                                                                                                                        |                                                                                                                                                                                                                                                                                                                                                                                                                                                                                                                                                                                                                                                                                                                                                                                                                                                                                                                                                                                                                                                                                                                                                                                                                                                                                                                                                                                                                                                                                                                                                                                                                                                                                                                                                                                                                                                                                                                                                                                                                                                                                                                                                                                                                                                                                                                                                                                                                                                                                                                                                                                                                                                                                                                                                                                                                                                                                                                                                                                                                                                                                      |   |          |          |          |   |          |         |          |   |          |          |          |   |          |         |          |   |          |         |          |   |          |          |          |   |          |          |          |   |         |         |          |   |          |         |          |   |          |         |          |   |          |         |          |   |          |          |         |   |          |          |         |   |         |          |         |   |          |          |         |   |         |          |         |   |         |          |          |   |          |          |          |   |          |          |          |   |          |         |          |   |         |          |          |   |         |          |          |   |         |          |          |   |         |          |          |   |         |          |          |   |         |          |          |   |         |          |          |   |         |          |          |   |         |         |          |   |         |         |          |   |         |         |          |   |         |         |          |   |         |         |          |   |          |          |         |   |          |         |         |   |          |         |         |   |          |         |         |   |          |         |         |   |          |          |         |   |          |          |         |   |          |          |         |   |          |          |         |
| C                                                                                                                                                                                                                     | -1.06162                                                                                                                                                                                                                                                                                                                                                                                                                                                                                                                                                                                                                                                                                                                                                                                                                                                                                                                                                                                                                                                                                                                                                                                                                                                                                                                                                                                                                                                                                                                                                                                                                                                                                                                                                                                                                                                                                                                                                                                                                                                                                                                                                                                                                                                                                                                                                                                                                                                                                                                                                                                                                                                                                                                                                                                                                                                                                                                                                                                                                                                                           | 0.62193  | -0.59446 |         |          |   |          |         |          |   |          |          |          |   |          |         |          |   |          |         |          |   |          |          |          |   |          |          |          |   |          |         |          |   |          |         |         |   |          |         |         |   |         |         |         |   |          |         |         |   |          |         |         |   |         |         |         |   |          |         |         |   |          |         |         |   |         |         |         |   |          |         |          |   |          |         |          |   |          |         |         |   |         |         |          |   |         |          |          |   |         |          |          |   |         |          |          |   |         |          |         |   |         |         |         |   |         |         |         |   |          |         |         |   |          |         |         |   |          |         |          |   |          |         |          |                                                                                                                                                                                                                       |                                                                                                                                                                                                                                                                                                                                                                                                                                                                                                                                                                                                                                                                                                                                                                                                                                                                                                                                                                                                                                                                                                                                                                                                                                                                                                                                                                                                                                                                                                                                                                                                                                                                                                                                                                                                                                                                                                                                                                                                                                                                                                                                                                                                                                                                                |         |          |          |          |         |          |          |          |          |          |          |          |          |         |          |          |          |          |         |          |          |         |          |          |          |         |          |          |          |          |         |          |          |          |         |         |          |          |         |          |          |          |                                                                                                                                                                                                                        |                                                                                                                                                                                                                                                                                                                                                                                                                                                                                                                                                                                                                                                                                                                                                                                                                                                                                                                                                                                                                                                                                                                                                                                                                                                                                                                                                                                                                                                                                                                                                                                                                                                                                                                                                                                                                                                                                                                                                                                                                                                                                                                                                                                                                                                                                                                                                                                                                                                                                                                                                                                                                                                                                                                                                                                                                                                                                                                                                                                                                                                                                      |   |          |          |          |   |          |         |          |   |          |          |          |   |          |         |          |   |          |         |          |   |          |          |          |   |          |          |          |   |         |         |          |   |          |         |          |   |          |         |          |   |          |         |          |   |          |          |         |   |          |          |         |   |         |          |         |   |          |          |         |   |         |          |         |   |         |          |          |   |          |          |          |   |          |          |          |   |          |         |          |   |         |          |          |   |         |          |          |   |         |          |          |   |         |          |          |   |         |          |          |   |         |          |          |   |         |          |          |   |         |          |          |   |         |         |          |   |         |         |          |   |         |         |          |   |         |         |          |   |         |         |          |   |          |          |         |   |          |         |         |   |          |         |         |   |          |         |         |   |          |         |         |   |          |          |         |   |          |          |         |   |          |          |         |   |          |          |         |
| C                                                                                                                                                                                                                     | -1.35952                                                                                                                                                                                                                                                                                                                                                                                                                                                                                                                                                                                                                                                                                                                                                                                                                                                                                                                                                                                                                                                                                                                                                                                                                                                                                                                                                                                                                                                                                                                                                                                                                                                                                                                                                                                                                                                                                                                                                                                                                                                                                                                                                                                                                                                                                                                                                                                                                                                                                                                                                                                                                                                                                                                                                                                                                                                                                                                                                                                                                                                                           | -0.39881 | -2.75983 |         |          |   |          |         |          |   |          |          |          |   |          |         |          |   |          |         |          |   |          |          |          |   |          |          |          |   |          |         |          |   |          |         |         |   |          |         |         |   |         |         |         |   |          |         |         |   |          |         |         |   |         |         |         |   |          |         |         |   |          |         |         |   |         |         |         |   |          |         |          |   |          |         |          |   |          |         |         |   |         |         |          |   |         |          |          |   |         |          |          |   |         |          |          |   |         |          |         |   |         |         |         |   |         |         |         |   |          |         |         |   |          |         |         |   |          |         |          |   |          |         |          |                                                                                                                                                                                                                       |                                                                                                                                                                                                                                                                                                                                                                                                                                                                                                                                                                                                                                                                                                                                                                                                                                                                                                                                                                                                                                                                                                                                                                                                                                                                                                                                                                                                                                                                                                                                                                                                                                                                                                                                                                                                                                                                                                                                                                                                                                                                                                                                                                                                                                                                                |         |          |          |          |         |          |          |          |          |          |          |          |          |         |          |          |          |          |         |          |          |         |          |          |          |         |          |          |          |          |         |          |          |          |         |         |          |          |         |          |          |          |                                                                                                                                                                                                                        |                                                                                                                                                                                                                                                                                                                                                                                                                                                                                                                                                                                                                                                                                                                                                                                                                                                                                                                                                                                                                                                                                                                                                                                                                                                                                                                                                                                                                                                                                                                                                                                                                                                                                                                                                                                                                                                                                                                                                                                                                                                                                                                                                                                                                                                                                                                                                                                                                                                                                                                                                                                                                                                                                                                                                                                                                                                                                                                                                                                                                                                                                      |   |          |          |          |   |          |         |          |   |          |          |          |   |          |         |          |   |          |         |          |   |          |          |          |   |          |          |          |   |         |         |          |   |          |         |          |   |          |         |          |   |          |         |          |   |          |          |         |   |          |          |         |   |         |          |         |   |          |          |         |   |         |          |         |   |         |          |          |   |          |          |          |   |          |          |          |   |          |         |          |   |         |          |          |   |         |          |          |   |         |          |          |   |         |          |          |   |         |          |          |   |         |          |          |   |         |          |          |   |         |          |          |   |         |         |          |   |         |         |          |   |         |         |          |   |         |         |          |   |         |         |          |   |          |          |         |   |          |         |         |   |          |         |         |   |          |         |         |   |          |         |         |   |          |          |         |   |          |          |         |   |          |          |         |   |          |          |         |
| C                                                                                                                                                                                                                     | -1.77053                                                                                                                                                                                                                                                                                                                                                                                                                                                                                                                                                                                                                                                                                                                                                                                                                                                                                                                                                                                                                                                                                                                                                                                                                                                                                                                                                                                                                                                                                                                                                                                                                                                                                                                                                                                                                                                                                                                                                                                                                                                                                                                                                                                                                                                                                                                                                                                                                                                                                                                                                                                                                                                                                                                                                                                                                                                                                                                                                                                                                                                                           | 1.95939  | -2.49840 |         |          |   |          |         |          |   |          |          |          |   |          |         |          |   |          |         |          |   |          |          |          |   |          |          |          |   |          |         |          |   |          |         |         |   |          |         |         |   |         |         |         |   |          |         |         |   |          |         |         |   |         |         |         |   |          |         |         |   |          |         |         |   |         |         |         |   |          |         |          |   |          |         |          |   |          |         |         |   |         |         |          |   |         |          |          |   |         |          |          |   |         |          |          |   |         |          |         |   |         |         |         |   |         |         |         |   |          |         |         |   |          |         |         |   |          |         |          |   |          |         |          |                                                                                                                                                                                                                       |                                                                                                                                                                                                                                                                                                                                                                                                                                                                                                                                                                                                                                                                                                                                                                                                                                                                                                                                                                                                                                                                                                                                                                                                                                                                                                                                                                                                                                                                                                                                                                                                                                                                                                                                                                                                                                                                                                                                                                                                                                                                                                                                                                                                                                                                                |         |          |          |          |         |          |          |          |          |          |          |          |          |         |          |          |          |          |         |          |          |         |          |          |          |         |          |          |          |          |         |          |          |          |         |         |          |          |         |          |          |          |                                                                                                                                                                                                                        |                                                                                                                                                                                                                                                                                                                                                                                                                                                                                                                                                                                                                                                                                                                                                                                                                                                                                                                                                                                                                                                                                                                                                                                                                                                                                                                                                                                                                                                                                                                                                                                                                                                                                                                                                                                                                                                                                                                                                                                                                                                                                                                                                                                                                                                                                                                                                                                                                                                                                                                                                                                                                                                                                                                                                                                                                                                                                                                                                                                                                                                                                      |   |          |          |          |   |          |         |          |   |          |          |          |   |          |         |          |   |          |         |          |   |          |          |          |   |          |          |          |   |         |         |          |   |          |         |          |   |          |         |          |   |          |         |          |   |          |          |         |   |          |          |         |   |         |          |         |   |          |          |         |   |         |          |         |   |         |          |          |   |          |          |          |   |          |          |          |   |          |         |          |   |         |          |          |   |         |          |          |   |         |          |          |   |         |          |          |   |         |          |          |   |         |          |          |   |         |          |          |   |         |          |          |   |         |         |          |   |         |         |          |   |         |         |          |   |         |         |          |   |         |         |          |   |          |          |         |   |          |         |         |   |          |         |         |   |          |         |         |   |          |         |         |   |          |          |         |   |          |          |         |   |          |          |         |   |          |          |         |
| C                                                                                                                                                                                                                     | -1.46036                                                                                                                                                                                                                                                                                                                                                                                                                                                                                                                                                                                                                                                                                                                                                                                                                                                                                                                                                                                                                                                                                                                                                                                                                                                                                                                                                                                                                                                                                                                                                                                                                                                                                                                                                                                                                                                                                                                                                                                                                                                                                                                                                                                                                                                                                                                                                                                                                                                                                                                                                                                                                                                                                                                                                                                                                                                                                                                                                                                                                                                                           | 1.83974  | -1.15093 |         |          |   |          |         |          |   |          |          |          |   |          |         |          |   |          |         |          |   |          |          |          |   |          |          |          |   |          |         |          |   |          |         |         |   |          |         |         |   |         |         |         |   |          |         |         |   |          |         |         |   |         |         |         |   |          |         |         |   |          |         |         |   |         |         |         |   |          |         |          |   |          |         |          |   |          |         |         |   |         |         |          |   |         |          |          |   |         |          |          |   |         |          |          |   |         |          |         |   |         |         |         |   |         |         |         |   |          |         |         |   |          |         |         |   |          |         |          |   |          |         |          |                                                                                                                                                                                                                       |                                                                                                                                                                                                                                                                                                                                                                                                                                                                                                                                                                                                                                                                                                                                                                                                                                                                                                                                                                                                                                                                                                                                                                                                                                                                                                                                                                                                                                                                                                                                                                                                                                                                                                                                                                                                                                                                                                                                                                                                                                                                                                                                                                                                                                                                                |         |          |          |          |         |          |          |          |          |          |          |          |          |         |          |          |          |          |         |          |          |         |          |          |          |         |          |          |          |          |         |          |          |          |         |         |          |          |         |          |          |          |                                                                                                                                                                                                                        |                                                                                                                                                                                                                                                                                                                                                                                                                                                                                                                                                                                                                                                                                                                                                                                                                                                                                                                                                                                                                                                                                                                                                                                                                                                                                                                                                                                                                                                                                                                                                                                                                                                                                                                                                                                                                                                                                                                                                                                                                                                                                                                                                                                                                                                                                                                                                                                                                                                                                                                                                                                                                                                                                                                                                                                                                                                                                                                                                                                                                                                                                      |   |          |          |          |   |          |         |          |   |          |          |          |   |          |         |          |   |          |         |          |   |          |          |          |   |          |          |          |   |         |         |          |   |          |         |          |   |          |         |          |   |          |         |          |   |          |          |         |   |          |          |         |   |         |          |         |   |          |          |         |   |         |          |         |   |         |          |          |   |          |          |          |   |          |          |          |   |          |         |          |   |         |          |          |   |         |          |          |   |         |          |          |   |         |          |          |   |         |          |          |   |         |          |          |   |         |          |          |   |         |          |          |   |         |         |          |   |         |         |          |   |         |         |          |   |         |         |          |   |         |         |          |   |          |          |         |   |          |         |         |   |          |         |         |   |          |         |         |   |          |         |         |   |          |          |         |   |          |          |         |   |          |          |         |   |          |          |         |
| C                                                                                                                                                                                                                     | -1.05099                                                                                                                                                                                                                                                                                                                                                                                                                                                                                                                                                                                                                                                                                                                                                                                                                                                                                                                                                                                                                                                                                                                                                                                                                                                                                                                                                                                                                                                                                                                                                                                                                                                                                                                                                                                                                                                                                                                                                                                                                                                                                                                                                                                                                                                                                                                                                                                                                                                                                                                                                                                                                                                                                                                                                                                                                                                                                                                                                                                                                                                                           | -0.53758 | -1.40003 |         |          |   |          |         |          |   |          |          |          |   |          |         |          |   |          |         |          |   |          |          |          |   |          |          |          |   |          |         |          |   |          |         |         |   |          |         |         |   |         |         |         |   |          |         |         |   |          |         |         |   |         |         |         |   |          |         |         |   |          |         |         |   |         |         |         |   |          |         |          |   |          |         |          |   |          |         |         |   |         |         |          |   |         |          |          |   |         |          |          |   |         |          |          |   |         |          |         |   |         |         |         |   |         |         |         |   |          |         |         |   |          |         |         |   |          |         |          |   |          |         |          |                                                                                                                                                                                                                       |                                                                                                                                                                                                                                                                                                                                                                                                                                                                                                                                                                                                                                                                                                                                                                                                                                                                                                                                                                                                                                                                                                                                                                                                                                                                                                                                                                                                                                                                                                                                                                                                                                                                                                                                                                                                                                                                                                                                                                                                                                                                                                                                                                                                                                                                                |         |          |          |          |         |          |          |          |          |          |          |          |          |         |          |          |          |          |         |          |          |         |          |          |          |         |          |          |          |          |         |          |          |          |         |         |          |          |         |          |          |          |                                                                                                                                                                                                                        |                                                                                                                                                                                                                                                                                                                                                                                                                                                                                                                                                                                                                                                                                                                                                                                                                                                                                                                                                                                                                                                                                                                                                                                                                                                                                                                                                                                                                                                                                                                                                                                                                                                                                                                                                                                                                                                                                                                                                                                                                                                                                                                                                                                                                                                                                                                                                                                                                                                                                                                                                                                                                                                                                                                                                                                                                                                                                                                                                                                                                                                                                      |   |          |          |          |   |          |         |          |   |          |          |          |   |          |         |          |   |          |         |          |   |          |          |          |   |          |          |          |   |         |         |          |   |          |         |          |   |          |         |          |   |          |         |          |   |          |          |         |   |          |          |         |   |         |          |         |   |          |          |         |   |         |          |         |   |         |          |          |   |          |          |          |   |          |          |          |   |          |         |          |   |         |          |          |   |         |          |          |   |         |          |          |   |         |          |          |   |         |          |          |   |         |          |          |   |         |          |          |   |         |          |          |   |         |         |          |   |         |         |          |   |         |         |          |   |         |         |          |   |         |         |          |   |          |          |         |   |          |         |         |   |          |         |         |   |          |         |         |   |          |         |         |   |          |          |         |   |          |          |         |   |          |          |         |   |          |          |         |
| H                                                                                                                                                                                                                     | -1.35312                                                                                                                                                                                                                                                                                                                                                                                                                                                                                                                                                                                                                                                                                                                                                                                                                                                                                                                                                                                                                                                                                                                                                                                                                                                                                                                                                                                                                                                                                                                                                                                                                                                                                                                                                                                                                                                                                                                                                                                                                                                                                                                                                                                                                                                                                                                                                                                                                                                                                                                                                                                                                                                                                                                                                                                                                                                                                                                                                                                                                                                                           | -1.26867 | -3.39884 |         |          |   |          |         |          |   |          |          |          |   |          |         |          |   |          |         |          |   |          |          |          |   |          |          |          |   |          |         |          |   |          |         |         |   |          |         |         |   |         |         |         |   |          |         |         |   |          |         |         |   |         |         |         |   |          |         |         |   |          |         |         |   |         |         |         |   |          |         |          |   |          |         |          |   |          |         |         |   |         |         |          |   |         |          |          |   |         |          |          |   |         |          |          |   |         |          |         |   |         |         |         |   |         |         |         |   |          |         |         |   |          |         |         |   |          |         |          |   |          |         |          |                                                                                                                                                                                                                       |                                                                                                                                                                                                                                                                                                                                                                                                                                                                                                                                                                                                                                                                                                                                                                                                                                                                                                                                                                                                                                                                                                                                                                                                                                                                                                                                                                                                                                                                                                                                                                                                                                                                                                                                                                                                                                                                                                                                                                                                                                                                                                                                                                                                                                                                                |         |          |          |          |         |          |          |          |          |          |          |          |          |         |          |          |          |          |         |          |          |         |          |          |          |         |          |          |          |          |         |          |          |          |         |         |          |          |         |          |          |          |                                                                                                                                                                                                                        |                                                                                                                                                                                                                                                                                                                                                                                                                                                                                                                                                                                                                                                                                                                                                                                                                                                                                                                                                                                                                                                                                                                                                                                                                                                                                                                                                                                                                                                                                                                                                                                                                                                                                                                                                                                                                                                                                                                                                                                                                                                                                                                                                                                                                                                                                                                                                                                                                                                                                                                                                                                                                                                                                                                                                                                                                                                                                                                                                                                                                                                                                      |   |          |          |          |   |          |         |          |   |          |          |          |   |          |         |          |   |          |         |          |   |          |          |          |   |          |          |          |   |         |         |          |   |          |         |          |   |          |         |          |   |          |         |          |   |          |          |         |   |          |          |         |   |         |          |         |   |          |          |         |   |         |          |         |   |         |          |          |   |          |          |          |   |          |          |          |   |          |         |          |   |         |          |          |   |         |          |          |   |         |          |          |   |         |          |          |   |         |          |          |   |         |          |          |   |         |          |          |   |         |          |          |   |         |         |          |   |         |         |          |   |         |         |          |   |         |         |          |   |         |         |          |   |          |          |         |   |          |         |         |   |          |         |         |   |          |         |         |   |          |         |         |   |          |          |         |   |          |          |         |   |          |          |         |   |          |          |         |
| H                                                                                                                                                                                                                     | -1.49282                                                                                                                                                                                                                                                                                                                                                                                                                                                                                                                                                                                                                                                                                                                                                                                                                                                                                                                                                                                                                                                                                                                                                                                                                                                                                                                                                                                                                                                                                                                                                                                                                                                                                                                                                                                                                                                                                                                                                                                                                                                                                                                                                                                                                                                                                                                                                                                                                                                                                                                                                                                                                                                                                                                                                                                                                                                                                                                                                                                                                                                                           | 2.71356  | -0.51260 |         |          |   |          |         |          |   |          |          |          |   |          |         |          |   |          |         |          |   |          |          |          |   |          |          |          |   |          |         |          |   |          |         |         |   |          |         |         |   |         |         |         |   |          |         |         |   |          |         |         |   |         |         |         |   |          |         |         |   |          |         |         |   |         |         |         |   |          |         |          |   |          |         |          |   |          |         |         |   |         |         |          |   |         |          |          |   |         |          |          |   |         |          |          |   |         |          |         |   |         |         |         |   |         |         |         |   |          |         |         |   |          |         |         |   |          |         |          |   |          |         |          |                                                                                                                                                                                                                       |                                                                                                                                                                                                                                                                                                                                                                                                                                                                                                                                                                                                                                                                                                                                                                                                                                                                                                                                                                                                                                                                                                                                                                                                                                                                                                                                                                                                                                                                                                                                                                                                                                                                                                                                                                                                                                                                                                                                                                                                                                                                                                                                                                                                                                                                                |         |          |          |          |         |          |          |          |          |          |          |          |          |         |          |          |          |          |         |          |          |         |          |          |          |         |          |          |          |          |         |          |          |          |         |         |          |          |         |          |          |          |                                                                                                                                                                                                                        |                                                                                                                                                                                                                                                                                                                                                                                                                                                                                                                                                                                                                                                                                                                                                                                                                                                                                                                                                                                                                                                                                                                                                                                                                                                                                                                                                                                                                                                                                                                                                                                                                                                                                                                                                                                                                                                                                                                                                                                                                                                                                                                                                                                                                                                                                                                                                                                                                                                                                                                                                                                                                                                                                                                                                                                                                                                                                                                                                                                                                                                                                      |   |          |          |          |   |          |         |          |   |          |          |          |   |          |         |          |   |          |         |          |   |          |          |          |   |          |          |          |   |         |         |          |   |          |         |          |   |          |         |          |   |          |         |          |   |          |          |         |   |          |          |         |   |         |          |         |   |          |          |         |   |         |          |         |   |         |          |          |   |          |          |          |   |          |          |          |   |          |         |          |   |         |          |          |   |         |          |          |   |         |          |          |   |         |          |          |   |         |          |          |   |         |          |          |   |         |          |          |   |         |          |          |   |         |         |          |   |         |         |          |   |         |         |          |   |         |         |          |   |         |         |          |   |          |          |         |   |          |         |         |   |          |         |         |   |          |         |         |   |          |         |         |   |          |          |         |   |          |          |         |   |          |          |         |   |          |          |         |
| C                                                                                                                                                                                                                     | -0.69469                                                                                                                                                                                                                                                                                                                                                                                                                                                                                                                                                                                                                                                                                                                                                                                                                                                                                                                                                                                                                                                                                                                                                                                                                                                                                                                                                                                                                                                                                                                                                                                                                                                                                                                                                                                                                                                                                                                                                                                                                                                                                                                                                                                                                                                                                                                                                                                                                                                                                                                                                                                                                                                                                                                                                                                                                                                                                                                                                                                                                                                                           | 0.64762  | 0.85506  |         |          |   |          |         |          |   |          |          |          |   |          |         |          |   |          |         |          |   |          |          |          |   |          |          |          |   |          |         |          |   |          |         |         |   |          |         |         |   |         |         |         |   |          |         |         |   |          |         |         |   |         |         |         |   |          |         |         |   |          |         |         |   |         |         |         |   |          |         |          |   |          |         |          |   |          |         |         |   |         |         |          |   |         |          |          |   |         |          |          |   |         |          |          |   |         |          |         |   |         |         |         |   |         |         |         |   |          |         |         |   |          |         |         |   |          |         |          |   |          |         |          |                                                                                                                                                                                                                       |                                                                                                                                                                                                                                                                                                                                                                                                                                                                                                                                                                                                                                                                                                                                                                                                                                                                                                                                                                                                                                                                                                                                                                                                                                                                                                                                                                                                                                                                                                                                                                                                                                                                                                                                                                                                                                                                                                                                                                                                                                                                                                                                                                                                                                                                                |         |          |          |          |         |          |          |          |          |          |          |          |          |         |          |          |          |          |         |          |          |         |          |          |          |         |          |          |          |          |         |          |          |          |         |         |          |          |         |          |          |          |                                                                                                                                                                                                                        |                                                                                                                                                                                                                                                                                                                                                                                                                                                                                                                                                                                                                                                                                                                                                                                                                                                                                                                                                                                                                                                                                                                                                                                                                                                                                                                                                                                                                                                                                                                                                                                                                                                                                                                                                                                                                                                                                                                                                                                                                                                                                                                                                                                                                                                                                                                                                                                                                                                                                                                                                                                                                                                                                                                                                                                                                                                                                                                                                                                                                                                                                      |   |          |          |          |   |          |         |          |   |          |          |          |   |          |         |          |   |          |         |          |   |          |          |          |   |          |          |          |   |         |         |          |   |          |         |          |   |          |         |          |   |          |         |          |   |          |          |         |   |          |          |         |   |         |          |         |   |          |          |         |   |         |          |         |   |         |          |          |   |          |          |          |   |          |          |          |   |          |         |          |   |         |          |          |   |         |          |          |   |         |          |          |   |         |          |          |   |         |          |          |   |         |          |          |   |         |          |          |   |         |          |          |   |         |         |          |   |         |         |          |   |         |         |          |   |         |         |          |   |         |         |          |   |          |          |         |   |          |         |         |   |          |         |         |   |          |         |         |   |          |         |         |   |          |          |         |   |          |          |         |   |          |          |         |   |          |          |         |
| C                                                                                                                                                                                                                     | -0.35452                                                                                                                                                                                                                                                                                                                                                                                                                                                                                                                                                                                                                                                                                                                                                                                                                                                                                                                                                                                                                                                                                                                                                                                                                                                                                                                                                                                                                                                                                                                                                                                                                                                                                                                                                                                                                                                                                                                                                                                                                                                                                                                                                                                                                                                                                                                                                                                                                                                                                                                                                                                                                                                                                                                                                                                                                                                                                                                                                                                                                                                                           | 0.79971  | 3.65316  |         |          |   |          |         |          |   |          |          |          |   |          |         |          |   |          |         |          |   |          |          |          |   |          |          |          |   |          |         |          |   |          |         |         |   |          |         |         |   |         |         |         |   |          |         |         |   |          |         |         |   |         |         |         |   |          |         |         |   |          |         |         |   |         |         |         |   |          |         |          |   |          |         |          |   |          |         |         |   |         |         |          |   |         |          |          |   |         |          |          |   |         |          |          |   |         |          |         |   |         |         |         |   |         |         |         |   |          |         |         |   |          |         |         |   |          |         |          |   |          |         |          |                                                                                                                                                                                                                       |                                                                                                                                                                                                                                                                                                                                                                                                                                                                                                                                                                                                                                                                                                                                                                                                                                                                                                                                                                                                                                                                                                                                                                                                                                                                                                                                                                                                                                                                                                                                                                                                                                                                                                                                                                                                                                                                                                                                                                                                                                                                                                                                                                                                                                                                                |         |          |          |          |         |          |          |          |          |          |          |          |          |         |          |          |          |          |         |          |          |         |          |          |          |         |          |          |          |          |         |          |          |          |         |         |          |          |         |          |          |          |                                                                                                                                                                                                                        |                                                                                                                                                                                                                                                                                                                                                                                                                                                                                                                                                                                                                                                                                                                                                                                                                                                                                                                                                                                                                                                                                                                                                                                                                                                                                                                                                                                                                                                                                                                                                                                                                                                                                                                                                                                                                                                                                                                                                                                                                                                                                                                                                                                                                                                                                                                                                                                                                                                                                                                                                                                                                                                                                                                                                                                                                                                                                                                                                                                                                                                                                      |   |          |          |          |   |          |         |          |   |          |          |          |   |          |         |          |   |          |         |          |   |          |          |          |   |          |          |          |   |         |         |          |   |          |         |          |   |          |         |          |   |          |         |          |   |          |          |         |   |          |          |         |   |         |          |         |   |          |          |         |   |         |          |         |   |         |          |          |   |          |          |          |   |          |          |          |   |          |         |          |   |         |          |          |   |         |          |          |   |         |          |          |   |         |          |          |   |         |          |          |   |         |          |          |   |         |          |          |   |         |          |          |   |         |         |          |   |         |         |          |   |         |         |          |   |         |         |          |   |         |         |          |   |          |          |         |   |          |         |         |   |          |         |         |   |          |         |         |   |          |         |         |   |          |          |         |   |          |          |         |   |          |          |         |   |          |          |         |
| C                                                                                                                                                                                                                     | 0.59130                                                                                                                                                                                                                                                                                                                                                                                                                                                                                                                                                                                                                                                                                                                                                                                                                                                                                                                                                                                                                                                                                                                                                                                                                                                                                                                                                                                                                                                                                                                                                                                                                                                                                                                                                                                                                                                                                                                                                                                                                                                                                                                                                                                                                                                                                                                                                                                                                                                                                                                                                                                                                                                                                                                                                                                                                                                                                                                                                                                                                                                                            | 0.64296  | 1.42695  |         |          |   |          |         |          |   |          |          |          |   |          |         |          |   |          |         |          |   |          |          |          |   |          |          |          |   |          |         |          |   |          |         |         |   |          |         |         |   |         |         |         |   |          |         |         |   |          |         |         |   |         |         |         |   |          |         |         |   |          |         |         |   |         |         |         |   |          |         |          |   |          |         |          |   |          |         |         |   |         |         |          |   |         |          |          |   |         |          |          |   |         |          |          |   |         |          |         |   |         |         |         |   |         |         |         |   |          |         |         |   |          |         |         |   |          |         |          |   |          |         |          |                                                                                                                                                                                                                       |                                                                                                                                                                                                                                                                                                                                                                                                                                                                                                                                                                                                                                                                                                                                                                                                                                                                                                                                                                                                                                                                                                                                                                                                                                                                                                                                                                                                                                                                                                                                                                                                                                                                                                                                                                                                                                                                                                                                                                                                                                                                                                                                                                                                                                                                                |         |          |          |          |         |          |          |          |          |          |          |          |          |         |          |          |          |          |         |          |          |         |          |          |          |         |          |          |          |          |         |          |          |          |         |         |          |          |         |          |          |          |                                                                                                                                                                                                                        |                                                                                                                                                                                                                                                                                                                                                                                                                                                                                                                                                                                                                                                                                                                                                                                                                                                                                                                                                                                                                                                                                                                                                                                                                                                                                                                                                                                                                                                                                                                                                                                                                                                                                                                                                                                                                                                                                                                                                                                                                                                                                                                                                                                                                                                                                                                                                                                                                                                                                                                                                                                                                                                                                                                                                                                                                                                                                                                                                                                                                                                                                      |   |          |          |          |   |          |         |          |   |          |          |          |   |          |         |          |   |          |         |          |   |          |          |          |   |          |          |          |   |         |         |          |   |          |         |          |   |          |         |          |   |          |         |          |   |          |          |         |   |          |          |         |   |         |          |         |   |          |          |         |   |         |          |         |   |         |          |          |   |          |          |          |   |          |          |          |   |          |         |          |   |         |          |          |   |         |          |          |   |         |          |          |   |         |          |          |   |         |          |          |   |         |          |          |   |         |          |          |   |         |          |          |   |         |         |          |   |         |         |          |   |         |         |          |   |         |         |          |   |         |         |          |   |          |          |         |   |          |         |         |   |          |         |         |   |          |         |         |   |          |         |         |   |          |          |         |   |          |          |         |   |          |          |         |   |          |          |         |
| C                                                                                                                                                                                                                     | -1.77797                                                                                                                                                                                                                                                                                                                                                                                                                                                                                                                                                                                                                                                                                                                                                                                                                                                                                                                                                                                                                                                                                                                                                                                                                                                                                                                                                                                                                                                                                                                                                                                                                                                                                                                                                                                                                                                                                                                                                                                                                                                                                                                                                                                                                                                                                                                                                                                                                                                                                                                                                                                                                                                                                                                                                                                                                                                                                                                                                                                                                                                                           | 0.77879  | 1.73662  |         |          |   |          |         |          |   |          |          |          |   |          |         |          |   |          |         |          |   |          |          |          |   |          |          |          |   |          |         |          |   |          |         |         |   |          |         |         |   |         |         |         |   |          |         |         |   |          |         |         |   |         |         |         |   |          |         |         |   |          |         |         |   |         |         |         |   |          |         |          |   |          |         |          |   |          |         |         |   |         |         |          |   |         |          |          |   |         |          |          |   |         |          |          |   |         |          |         |   |         |         |         |   |         |         |         |   |          |         |         |   |          |         |         |   |          |         |          |   |          |         |          |                                                                                                                                                                                                                       |                                                                                                                                                                                                                                                                                                                                                                                                                                                                                                                                                                                                                                                                                                                                                                                                                                                                                                                                                                                                                                                                                                                                                                                                                                                                                                                                                                                                                                                                                                                                                                                                                                                                                                                                                                                                                                                                                                                                                                                                                                                                                                                                                                                                                                                                                |         |          |          |          |         |          |          |          |          |          |          |          |          |         |          |          |          |          |         |          |          |         |          |          |          |         |          |          |          |          |         |          |          |          |         |         |          |          |         |          |          |          |                                                                                                                                                                                                                        |                                                                                                                                                                                                                                                                                                                                                                                                                                                                                                                                                                                                                                                                                                                                                                                                                                                                                                                                                                                                                                                                                                                                                                                                                                                                                                                                                                                                                                                                                                                                                                                                                                                                                                                                                                                                                                                                                                                                                                                                                                                                                                                                                                                                                                                                                                                                                                                                                                                                                                                                                                                                                                                                                                                                                                                                                                                                                                                                                                                                                                                                                      |   |          |          |          |   |          |         |          |   |          |          |          |   |          |         |          |   |          |         |          |   |          |          |          |   |          |          |          |   |         |         |          |   |          |         |          |   |          |         |          |   |          |         |          |   |          |          |         |   |          |          |         |   |         |          |         |   |          |          |         |   |         |          |         |   |         |          |          |   |          |          |          |   |          |          |          |   |          |         |          |   |         |          |          |   |         |          |          |   |         |          |          |   |         |          |          |   |         |          |          |   |         |          |          |   |         |          |          |   |         |          |          |   |         |         |          |   |         |         |          |   |         |         |          |   |         |         |          |   |         |         |          |   |          |          |         |   |          |         |         |   |          |         |         |   |          |         |         |   |          |         |         |   |          |          |         |   |          |          |         |   |          |          |         |   |          |          |         |
| C                                                                                                                                                                                                                     | -1.62870                                                                                                                                                                                                                                                                                                                                                                                                                                                                                                                                                                                                                                                                                                                                                                                                                                                                                                                                                                                                                                                                                                                                                                                                                                                                                                                                                                                                                                                                                                                                                                                                                                                                                                                                                                                                                                                                                                                                                                                                                                                                                                                                                                                                                                                                                                                                                                                                                                                                                                                                                                                                                                                                                                                                                                                                                                                                                                                                                                                                                                                                           | 0.85470  | 3.11095  |         |          |   |          |         |          |   |          |          |          |   |          |         |          |   |          |         |          |   |          |          |          |   |          |          |          |   |          |         |          |   |          |         |         |   |          |         |         |   |         |         |         |   |          |         |         |   |          |         |         |   |         |         |         |   |          |         |         |   |          |         |         |   |         |         |         |   |          |         |          |   |          |         |          |   |          |         |         |   |         |         |          |   |         |          |          |   |         |          |          |   |         |          |          |   |         |          |         |   |         |         |         |   |         |         |         |   |          |         |         |   |          |         |         |   |          |         |          |   |          |         |          |                                                                                                                                                                                                                       |                                                                                                                                                                                                                                                                                                                                                                                                                                                                                                                                                                                                                                                                                                                                                                                                                                                                                                                                                                                                                                                                                                                                                                                                                                                                                                                                                                                                                                                                                                                                                                                                                                                                                                                                                                                                                                                                                                                                                                                                                                                                                                                                                                                                                                                                                |         |          |          |          |         |          |          |          |          |          |          |          |          |         |          |          |          |          |         |          |          |         |          |          |          |         |          |          |          |          |         |          |          |          |         |         |          |          |         |          |          |          |                                                                                                                                                                                                                        |                                                                                                                                                                                                                                                                                                                                                                                                                                                                                                                                                                                                                                                                                                                                                                                                                                                                                                                                                                                                                                                                                                                                                                                                                                                                                                                                                                                                                                                                                                                                                                                                                                                                                                                                                                                                                                                                                                                                                                                                                                                                                                                                                                                                                                                                                                                                                                                                                                                                                                                                                                                                                                                                                                                                                                                                                                                                                                                                                                                                                                                                                      |   |          |          |          |   |          |         |          |   |          |          |          |   |          |         |          |   |          |         |          |   |          |          |          |   |          |          |          |   |         |         |          |   |          |         |          |   |          |         |          |   |          |         |          |   |          |          |         |   |          |          |         |   |         |          |         |   |          |          |         |   |         |          |         |   |         |          |          |   |          |          |          |   |          |          |          |   |          |         |          |   |         |          |          |   |         |          |          |   |         |          |          |   |         |          |          |   |         |          |          |   |         |          |          |   |         |          |          |   |         |          |          |   |         |         |          |   |         |         |          |   |         |         |          |   |         |         |          |   |         |         |          |   |          |          |         |   |          |         |         |   |          |         |         |   |          |         |         |   |          |         |         |   |          |          |         |   |          |          |         |   |          |          |         |   |          |          |         |
| C                                                                                                                                                                                                                     | 0.74417                                                                                                                                                                                                                                                                                                                                                                                                                                                                                                                                                                                                                                                                                                                                                                                                                                                                                                                                                                                                                                                                                                                                                                                                                                                                                                                                                                                                                                                                                                                                                                                                                                                                                                                                                                                                                                                                                                                                                                                                                                                                                                                                                                                                                                                                                                                                                                                                                                                                                                                                                                                                                                                                                                                                                                                                                                                                                                                                                                                                                                                                            | 0.69903  | 2.81216  |         |          |   |          |         |          |   |          |          |          |   |          |         |          |   |          |         |          |   |          |          |          |   |          |          |          |   |          |         |          |   |          |         |         |   |          |         |         |   |         |         |         |   |          |         |         |   |          |         |         |   |         |         |         |   |          |         |         |   |          |         |         |   |         |         |         |   |          |         |          |   |          |         |          |   |          |         |         |   |         |         |          |   |         |          |          |   |         |          |          |   |         |          |          |   |         |          |         |   |         |         |         |   |         |         |         |   |          |         |         |   |          |         |         |   |          |         |          |   |          |         |          |                                                                                                                                                                                                                       |                                                                                                                                                                                                                                                                                                                                                                                                                                                                                                                                                                                                                                                                                                                                                                                                                                                                                                                                                                                                                                                                                                                                                                                                                                                                                                                                                                                                                                                                                                                                                                                                                                                                                                                                                                                                                                                                                                                                                                                                                                                                                                                                                                                                                                                                                |         |          |          |          |         |          |          |          |          |          |          |          |          |         |          |          |          |          |         |          |          |         |          |          |          |         |          |          |          |          |         |          |          |          |         |         |          |          |         |          |          |          |                                                                                                                                                                                                                        |                                                                                                                                                                                                                                                                                                                                                                                                                                                                                                                                                                                                                                                                                                                                                                                                                                                                                                                                                                                                                                                                                                                                                                                                                                                                                                                                                                                                                                                                                                                                                                                                                                                                                                                                                                                                                                                                                                                                                                                                                                                                                                                                                                                                                                                                                                                                                                                                                                                                                                                                                                                                                                                                                                                                                                                                                                                                                                                                                                                                                                                                                      |   |          |          |          |   |          |         |          |   |          |          |          |   |          |         |          |   |          |         |          |   |          |          |          |   |          |          |          |   |         |         |          |   |          |         |          |   |          |         |          |   |          |         |          |   |          |          |         |   |          |          |         |   |         |          |         |   |          |          |         |   |         |          |         |   |         |          |          |   |          |          |          |   |          |          |          |   |          |         |          |   |         |          |          |   |         |          |          |   |         |          |          |   |         |          |          |   |         |          |          |   |         |          |          |   |         |          |          |   |         |          |          |   |         |         |          |   |         |         |          |   |         |         |          |   |         |         |          |   |         |         |          |   |          |          |         |   |          |         |         |   |          |         |         |   |          |         |         |   |          |         |         |   |          |          |         |   |          |          |         |   |          |          |         |   |          |          |         |
| H                                                                                                                                                                                                                     | -2.76809                                                                                                                                                                                                                                                                                                                                                                                                                                                                                                                                                                                                                                                                                                                                                                                                                                                                                                                                                                                                                                                                                                                                                                                                                                                                                                                                                                                                                                                                                                                                                                                                                                                                                                                                                                                                                                                                                                                                                                                                                                                                                                                                                                                                                                                                                                                                                                                                                                                                                                                                                                                                                                                                                                                                                                                                                                                                                                                                                                                                                                                                           | 0.81026  | 1.30286  |         |          |   |          |         |          |   |          |          |          |   |          |         |          |   |          |         |          |   |          |          |          |   |          |          |          |   |          |         |          |   |          |         |         |   |          |         |         |   |         |         |         |   |          |         |         |   |          |         |         |   |         |         |         |   |          |         |         |   |          |         |         |   |         |         |         |   |          |         |          |   |          |         |          |   |          |         |         |   |         |         |          |   |         |          |          |   |         |          |          |   |         |          |          |   |         |          |         |   |         |         |         |   |         |         |         |   |          |         |         |   |          |         |         |   |          |         |          |   |          |         |          |                                                                                                                                                                                                                       |                                                                                                                                                                                                                                                                                                                                                                                                                                                                                                                                                                                                                                                                                                                                                                                                                                                                                                                                                                                                                                                                                                                                                                                                                                                                                                                                                                                                                                                                                                                                                                                                                                                                                                                                                                                                                                                                                                                                                                                                                                                                                                                                                                                                                                                                                |         |          |          |          |         |          |          |          |          |          |          |          |          |         |          |          |          |          |         |          |          |         |          |          |          |         |          |          |          |          |         |          |          |          |         |         |          |          |         |          |          |          |                                                                                                                                                                                                                        |                                                                                                                                                                                                                                                                                                                                                                                                                                                                                                                                                                                                                                                                                                                                                                                                                                                                                                                                                                                                                                                                                                                                                                                                                                                                                                                                                                                                                                                                                                                                                                                                                                                                                                                                                                                                                                                                                                                                                                                                                                                                                                                                                                                                                                                                                                                                                                                                                                                                                                                                                                                                                                                                                                                                                                                                                                                                                                                                                                                                                                                                                      |   |          |          |          |   |          |         |          |   |          |          |          |   |          |         |          |   |          |         |          |   |          |          |          |   |          |          |          |   |         |         |          |   |          |         |          |   |          |         |          |   |          |         |          |   |          |          |         |   |          |          |         |   |         |          |         |   |          |          |         |   |         |          |         |   |         |          |          |   |          |          |          |   |          |          |          |   |          |         |          |   |         |          |          |   |         |          |          |   |         |          |          |   |         |          |          |   |         |          |          |   |         |          |          |   |         |          |          |   |         |          |          |   |         |         |          |   |         |         |          |   |         |         |          |   |         |         |          |   |         |         |          |   |          |          |         |   |          |         |         |   |          |         |         |   |          |         |         |   |          |         |         |   |          |          |         |   |          |          |         |   |          |          |         |   |          |          |         |
| H                                                                                                                                                                                                                     | -2.49747                                                                                                                                                                                                                                                                                                                                                                                                                                                                                                                                                                                                                                                                                                                                                                                                                                                                                                                                                                                                                                                                                                                                                                                                                                                                                                                                                                                                                                                                                                                                                                                                                                                                                                                                                                                                                                                                                                                                                                                                                                                                                                                                                                                                                                                                                                                                                                                                                                                                                                                                                                                                                                                                                                                                                                                                                                                                                                                                                                                                                                                                           | 0.95204  | 3.74719  |         |          |   |          |         |          |   |          |          |          |   |          |         |          |   |          |         |          |   |          |          |          |   |          |          |          |   |          |         |          |   |          |         |         |   |          |         |         |   |         |         |         |   |          |         |         |   |          |         |         |   |         |         |         |   |          |         |         |   |          |         |         |   |         |         |         |   |          |         |          |   |          |         |          |   |          |         |         |   |         |         |          |   |         |          |          |   |         |          |          |   |         |          |          |   |         |          |         |   |         |         |         |   |         |         |         |   |          |         |         |   |          |         |         |   |          |         |          |   |          |         |          |                                                                                                                                                                                                                       |                                                                                                                                                                                                                                                                                                                                                                                                                                                                                                                                                                                                                                                                                                                                                                                                                                                                                                                                                                                                                                                                                                                                                                                                                                                                                                                                                                                                                                                                                                                                                                                                                                                                                                                                                                                                                                                                                                                                                                                                                                                                                                                                                                                                                                                                                |         |          |          |          |         |          |          |          |          |          |          |          |          |         |          |          |          |          |         |          |          |         |          |          |          |         |          |          |          |          |         |          |          |          |         |         |          |          |         |          |          |          |                                                                                                                                                                                                                        |                                                                                                                                                                                                                                                                                                                                                                                                                                                                                                                                                                                                                                                                                                                                                                                                                                                                                                                                                                                                                                                                                                                                                                                                                                                                                                                                                                                                                                                                                                                                                                                                                                                                                                                                                                                                                                                                                                                                                                                                                                                                                                                                                                                                                                                                                                                                                                                                                                                                                                                                                                                                                                                                                                                                                                                                                                                                                                                                                                                                                                                                                      |   |          |          |          |   |          |         |          |   |          |          |          |   |          |         |          |   |          |         |          |   |          |          |          |   |          |          |          |   |         |         |          |   |          |         |          |   |          |         |          |   |          |         |          |   |          |          |         |   |          |          |         |   |         |          |         |   |          |          |         |   |         |          |         |   |         |          |          |   |          |          |          |   |          |          |          |   |          |         |          |   |         |          |          |   |         |          |          |   |         |          |          |   |         |          |          |   |         |          |          |   |         |          |          |   |         |          |          |   |         |          |          |   |         |         |          |   |         |         |          |   |         |         |          |   |         |         |          |   |         |         |          |   |          |          |         |   |          |         |         |   |          |         |         |   |          |         |         |   |          |         |         |   |          |          |         |   |          |          |         |   |          |          |         |   |          |          |         |
| H                                                                                                                                                                                                                     | 1.71505                                                                                                                                                                                                                                                                                                                                                                                                                                                                                                                                                                                                                                                                                                                                                                                                                                                                                                                                                                                                                                                                                                                                                                                                                                                                                                                                                                                                                                                                                                                                                                                                                                                                                                                                                                                                                                                                                                                                                                                                                                                                                                                                                                                                                                                                                                                                                                                                                                                                                                                                                                                                                                                                                                                                                                                                                                                                                                                                                                                                                                                                            | 0.67953  | 3.27537  |         |          |   |          |         |          |   |          |          |          |   |          |         |          |   |          |         |          |   |          |          |          |   |          |          |          |   |          |         |          |   |          |         |         |   |          |         |         |   |         |         |         |   |          |         |         |   |          |         |         |   |         |         |         |   |          |         |         |   |          |         |         |   |         |         |         |   |          |         |          |   |          |         |          |   |          |         |         |   |         |         |          |   |         |          |          |   |         |          |          |   |         |          |          |   |         |          |         |   |         |         |         |   |         |         |         |   |          |         |         |   |          |         |         |   |          |         |          |   |          |         |          |                                                                                                                                                                                                                       |                                                                                                                                                                                                                                                                                                                                                                                                                                                                                                                                                                                                                                                                                                                                                                                                                                                                                                                                                                                                                                                                                                                                                                                                                                                                                                                                                                                                                                                                                                                                                                                                                                                                                                                                                                                                                                                                                                                                                                                                                                                                                                                                                                                                                                                                                |         |          |          |          |         |          |          |          |          |          |          |          |          |         |          |          |          |          |         |          |          |         |          |          |          |         |          |          |          |          |         |          |          |          |         |         |          |          |         |          |          |          |                                                                                                                                                                                                                        |                                                                                                                                                                                                                                                                                                                                                                                                                                                                                                                                                                                                                                                                                                                                                                                                                                                                                                                                                                                                                                                                                                                                                                                                                                                                                                                                                                                                                                                                                                                                                                                                                                                                                                                                                                                                                                                                                                                                                                                                                                                                                                                                                                                                                                                                                                                                                                                                                                                                                                                                                                                                                                                                                                                                                                                                                                                                                                                                                                                                                                                                                      |   |          |          |          |   |          |         |          |   |          |          |          |   |          |         |          |   |          |         |          |   |          |          |          |   |          |          |          |   |         |         |          |   |          |         |          |   |          |         |          |   |          |         |          |   |          |          |         |   |          |          |         |   |         |          |         |   |          |          |         |   |         |          |         |   |         |          |          |   |          |          |          |   |          |          |          |   |          |         |          |   |         |          |          |   |         |          |          |   |         |          |          |   |         |          |          |   |         |          |          |   |         |          |          |   |         |          |          |   |         |          |          |   |         |         |          |   |         |         |          |   |         |         |          |   |         |         |          |   |         |         |          |   |          |          |         |   |          |         |         |   |          |         |         |   |          |         |         |   |          |         |         |   |          |          |         |   |          |          |         |   |          |          |         |   |          |          |         |
| H                                                                                                                                                                                                                     | -2.05868                                                                                                                                                                                                                                                                                                                                                                                                                                                                                                                                                                                                                                                                                                                                                                                                                                                                                                                                                                                                                                                                                                                                                                                                                                                                                                                                                                                                                                                                                                                                                                                                                                                                                                                                                                                                                                                                                                                                                                                                                                                                                                                                                                                                                                                                                                                                                                                                                                                                                                                                                                                                                                                                                                                                                                                                                                                                                                                                                                                                                                                                           | 2.91739  | -2.90817 |         |          |   |          |         |          |   |          |          |          |   |          |         |          |   |          |         |          |   |          |          |          |   |          |          |          |   |          |         |          |   |          |         |         |   |          |         |         |   |         |         |         |   |          |         |         |   |          |         |         |   |         |         |         |   |          |         |         |   |          |         |         |   |         |         |         |   |          |         |          |   |          |         |          |   |          |         |         |   |         |         |          |   |         |          |          |   |         |          |          |   |         |          |          |   |         |          |         |   |         |         |         |   |         |         |         |   |          |         |         |   |          |         |         |   |          |         |          |   |          |         |          |                                                                                                                                                                                                                       |                                                                                                                                                                                                                                                                                                                                                                                                                                                                                                                                                                                                                                                                                                                                                                                                                                                                                                                                                                                                                                                                                                                                                                                                                                                                                                                                                                                                                                                                                                                                                                                                                                                                                                                                                                                                                                                                                                                                                                                                                                                                                                                                                                                                                                                                                |         |          |          |          |         |          |          |          |          |          |          |          |          |         |          |          |          |          |         |          |          |         |          |          |          |         |          |          |          |          |         |          |          |          |         |         |          |          |         |          |          |          |                                                                                                                                                                                                                        |                                                                                                                                                                                                                                                                                                                                                                                                                                                                                                                                                                                                                                                                                                                                                                                                                                                                                                                                                                                                                                                                                                                                                                                                                                                                                                                                                                                                                                                                                                                                                                                                                                                                                                                                                                                                                                                                                                                                                                                                                                                                                                                                                                                                                                                                                                                                                                                                                                                                                                                                                                                                                                                                                                                                                                                                                                                                                                                                                                                                                                                                                      |   |          |          |          |   |          |         |          |   |          |          |          |   |          |         |          |   |          |         |          |   |          |          |          |   |          |          |          |   |         |         |          |   |          |         |          |   |          |         |          |   |          |         |          |   |          |          |         |   |          |          |         |   |         |          |         |   |          |          |         |   |         |          |         |   |         |          |          |   |          |          |          |   |          |          |          |   |          |         |          |   |         |          |          |   |         |          |          |   |         |          |          |   |         |          |          |   |         |          |          |   |         |          |          |   |         |          |          |   |         |          |          |   |         |         |          |   |         |         |          |   |         |         |          |   |         |         |          |   |         |         |          |   |          |          |         |   |          |         |         |   |          |         |         |   |          |         |         |   |          |         |         |   |          |          |         |   |          |          |         |   |          |          |         |   |          |          |         |
| H                                                                                                                                                                                                                     | -1.93401                                                                                                                                                                                                                                                                                                                                                                                                                                                                                                                                                                                                                                                                                                                                                                                                                                                                                                                                                                                                                                                                                                                                                                                                                                                                                                                                                                                                                                                                                                                                                                                                                                                                                                                                                                                                                                                                                                                                                                                                                                                                                                                                                                                                                                                                                                                                                                                                                                                                                                                                                                                                                                                                                                                                                                                                                                                                                                                                                                                                                                                                           | 0.89929  | -4.36061 |         |          |   |          |         |          |   |          |          |          |   |          |         |          |   |          |         |          |   |          |          |          |   |          |          |          |   |          |         |          |   |          |         |         |   |          |         |         |   |         |         |         |   |          |         |         |   |          |         |         |   |         |         |         |   |          |         |         |   |          |         |         |   |         |         |         |   |          |         |          |   |          |         |          |   |          |         |         |   |         |         |          |   |         |          |          |   |         |          |          |   |         |          |          |   |         |          |         |   |         |         |         |   |         |         |         |   |          |         |         |   |          |         |         |   |          |         |          |   |          |         |          |                                                                                                                                                                                                                       |                                                                                                                                                                                                                                                                                                                                                                                                                                                                                                                                                                                                                                                                                                                                                                                                                                                                                                                                                                                                                                                                                                                                                                                                                                                                                                                                                                                                                                                                                                                                                                                                                                                                                                                                                                                                                                                                                                                                                                                                                                                                                                                                                                                                                                                                                |         |          |          |          |         |          |          |          |          |          |          |          |          |         |          |          |          |          |         |          |          |         |          |          |          |         |          |          |          |          |         |          |          |          |         |         |          |          |         |          |          |          |                                                                                                                                                                                                                        |                                                                                                                                                                                                                                                                                                                                                                                                                                                                                                                                                                                                                                                                                                                                                                                                                                                                                                                                                                                                                                                                                                                                                                                                                                                                                                                                                                                                                                                                                                                                                                                                                                                                                                                                                                                                                                                                                                                                                                                                                                                                                                                                                                                                                                                                                                                                                                                                                                                                                                                                                                                                                                                                                                                                                                                                                                                                                                                                                                                                                                                                                      |   |          |          |          |   |          |         |          |   |          |          |          |   |          |         |          |   |          |         |          |   |          |          |          |   |          |          |          |   |         |         |          |   |          |         |          |   |          |         |          |   |          |         |          |   |          |          |         |   |          |          |         |   |         |          |         |   |          |          |         |   |         |          |         |   |         |          |          |   |          |          |          |   |          |          |          |   |          |         |          |   |         |          |          |   |         |          |          |   |         |          |          |   |         |          |          |   |         |          |          |   |         |          |          |   |         |          |          |   |         |          |          |   |         |         |          |   |         |         |          |   |         |         |          |   |         |         |          |   |         |         |          |   |          |          |         |   |          |         |         |   |          |         |         |   |          |         |         |   |          |         |         |   |          |          |         |   |          |          |         |   |          |          |         |   |          |          |         |
| H                                                                                                                                                                                                                     | -0.20111                                                                                                                                                                                                                                                                                                                                                                                                                                                                                                                                                                                                                                                                                                                                                                                                                                                                                                                                                                                                                                                                                                                                                                                                                                                                                                                                                                                                                                                                                                                                                                                                                                                                                                                                                                                                                                                                                                                                                                                                                                                                                                                                                                                                                                                                                                                                                                                                                                                                                                                                                                                                                                                                                                                                                                                                                                                                                                                                                                                                                                                                           | 0.84677  | 4.72202  |         |          |   |          |         |          |   |          |          |          |   |          |         |          |   |          |         |          |   |          |          |          |   |          |          |          |   |          |         |          |   |          |         |         |   |          |         |         |   |         |         |         |   |          |         |         |   |          |         |         |   |         |         |         |   |          |         |         |   |          |         |         |   |         |         |         |   |          |         |          |   |          |         |          |   |          |         |         |   |         |         |          |   |         |          |          |   |         |          |          |   |         |          |          |   |         |          |         |   |         |         |         |   |         |         |         |   |          |         |         |   |          |         |         |   |          |         |          |   |          |         |          |                                                                                                                                                                                                                       |                                                                                                                                                                                                                                                                                                                                                                                                                                                                                                                                                                                                                                                                                                                                                                                                                                                                                                                                                                                                                                                                                                                                                                                                                                                                                                                                                                                                                                                                                                                                                                                                                                                                                                                                                                                                                                                                                                                                                                                                                                                                                                                                                                                                                                                                                |         |          |          |          |         |          |          |          |          |          |          |          |          |         |          |          |          |          |         |          |          |         |          |          |          |         |          |          |          |          |         |          |          |          |         |         |          |          |         |          |          |          |                                                                                                                                                                                                                        |                                                                                                                                                                                                                                                                                                                                                                                                                                                                                                                                                                                                                                                                                                                                                                                                                                                                                                                                                                                                                                                                                                                                                                                                                                                                                                                                                                                                                                                                                                                                                                                                                                                                                                                                                                                                                                                                                                                                                                                                                                                                                                                                                                                                                                                                                                                                                                                                                                                                                                                                                                                                                                                                                                                                                                                                                                                                                                                                                                                                                                                                                      |   |          |          |          |   |          |         |          |   |          |          |          |   |          |         |          |   |          |         |          |   |          |          |          |   |          |          |          |   |         |         |          |   |          |         |          |   |          |         |          |   |          |         |          |   |          |          |         |   |          |          |         |   |         |          |         |   |          |          |         |   |         |          |         |   |         |          |          |   |          |          |          |   |          |          |          |   |          |         |          |   |         |          |          |   |         |          |          |   |         |          |          |   |         |          |          |   |         |          |          |   |         |          |          |   |         |          |          |   |         |          |          |   |         |         |          |   |         |         |          |   |         |         |          |   |         |         |          |   |         |         |          |   |          |          |         |   |          |         |         |   |          |         |         |   |          |         |         |   |          |         |         |   |          |          |         |   |          |          |         |   |          |          |         |   |          |          |         |
| N                                                                                                                                                                                                                     | 1.85925                                                                                                                                                                                                                                                                                                                                                                                                                                                                                                                                                                                                                                                                                                                                                                                                                                                                                                                                                                                                                                                                                                                                                                                                                                                                                                                                                                                                                                                                                                                                                                                                                                                                                                                                                                                                                                                                                                                                                                                                                                                                                                                                                                                                                                                                                                                                                                                                                                                                                                                                                                                                                                                                                                                                                                                                                                                                                                                                                                                                                                                                            | 0.54240  | 0.59645  |         |          |   |          |         |          |   |          |          |          |   |          |         |          |   |          |         |          |   |          |          |          |   |          |          |          |   |          |         |          |   |          |         |         |   |          |         |         |   |         |         |         |   |          |         |         |   |          |         |         |   |         |         |         |   |          |         |         |   |          |         |         |   |         |         |         |   |          |         |          |   |          |         |          |   |          |         |         |   |         |         |          |   |         |          |          |   |         |          |          |   |         |          |          |   |         |          |         |   |         |         |         |   |         |         |         |   |          |         |         |   |          |         |         |   |          |         |          |   |          |         |          |                                                                                                                                                                                                                       |                                                                                                                                                                                                                                                                                                                                                                                                                                                                                                                                                                                                                                                                                                                                                                                                                                                                                                                                                                                                                                                                                                                                                                                                                                                                                                                                                                                                                                                                                                                                                                                                                                                                                                                                                                                                                                                                                                                                                                                                                                                                                                                                                                                                                                                                                |         |          |          |          |         |          |          |          |          |          |          |          |          |         |          |          |          |          |         |          |          |         |          |          |          |         |          |          |          |          |         |          |          |          |         |         |          |          |         |          |          |          |                                                                                                                                                                                                                        |                                                                                                                                                                                                                                                                                                                                                                                                                                                                                                                                                                                                                                                                                                                                                                                                                                                                                                                                                                                                                                                                                                                                                                                                                                                                                                                                                                                                                                                                                                                                                                                                                                                                                                                                                                                                                                                                                                                                                                                                                                                                                                                                                                                                                                                                                                                                                                                                                                                                                                                                                                                                                                                                                                                                                                                                                                                                                                                                                                                                                                                                                      |   |          |          |          |   |          |         |          |   |          |          |          |   |          |         |          |   |          |         |          |   |          |          |          |   |          |          |          |   |         |         |          |   |          |         |          |   |          |         |          |   |          |         |          |   |          |          |         |   |          |          |         |   |         |          |         |   |          |          |         |   |         |          |         |   |         |          |          |   |          |          |          |   |          |          |          |   |          |         |          |   |         |          |          |   |         |          |          |   |         |          |          |   |         |          |          |   |         |          |          |   |         |          |          |   |         |          |          |   |         |          |          |   |         |         |          |   |         |         |          |   |         |         |          |   |         |         |          |   |         |         |          |   |          |          |         |   |          |         |         |   |          |         |         |   |          |         |         |   |          |         |         |   |          |          |         |   |          |          |         |   |          |          |         |   |          |          |         |
| C                                                                                                                                                                                                                     | 2.11434                                                                                                                                                                                                                                                                                                                                                                                                                                                                                                                                                                                                                                                                                                                                                                                                                                                                                                                                                                                                                                                                                                                                                                                                                                                                                                                                                                                                                                                                                                                                                                                                                                                                                                                                                                                                                                                                                                                                                                                                                                                                                                                                                                                                                                                                                                                                                                                                                                                                                                                                                                                                                                                                                                                                                                                                                                                                                                                                                                                                                                                                            | -0.90674 | 0.26504  |         |          |   |          |         |          |   |          |          |          |   |          |         |          |   |          |         |          |   |          |          |          |   |          |          |          |   |          |         |          |   |          |         |         |   |          |         |         |   |         |         |         |   |          |         |         |   |          |         |         |   |         |         |         |   |          |         |         |   |          |         |         |   |         |         |         |   |          |         |          |   |          |         |          |   |          |         |         |   |         |         |          |   |         |          |          |   |         |          |          |   |         |          |          |   |         |          |         |   |         |         |         |   |         |         |         |   |          |         |         |   |          |         |         |   |          |         |          |   |          |         |          |                                                                                                                                                                                                                       |                                                                                                                                                                                                                                                                                                                                                                                                                                                                                                                                                                                                                                                                                                                                                                                                                                                                                                                                                                                                                                                                                                                                                                                                                                                                                                                                                                                                                                                                                                                                                                                                                                                                                                                                                                                                                                                                                                                                                                                                                                                                                                                                                                                                                                                                                |         |          |          |          |         |          |          |          |          |          |          |          |          |         |          |          |          |          |         |          |          |         |          |          |          |         |          |          |          |          |         |          |          |          |         |         |          |          |         |          |          |          |                                                                                                                                                                                                                        |                                                                                                                                                                                                                                                                                                                                                                                                                                                                                                                                                                                                                                                                                                                                                                                                                                                                                                                                                                                                                                                                                                                                                                                                                                                                                                                                                                                                                                                                                                                                                                                                                                                                                                                                                                                                                                                                                                                                                                                                                                                                                                                                                                                                                                                                                                                                                                                                                                                                                                                                                                                                                                                                                                                                                                                                                                                                                                                                                                                                                                                                                      |   |          |          |          |   |          |         |          |   |          |          |          |   |          |         |          |   |          |         |          |   |          |          |          |   |          |          |          |   |         |         |          |   |          |         |          |   |          |         |          |   |          |         |          |   |          |          |         |   |          |          |         |   |         |          |         |   |          |          |         |   |         |          |         |   |         |          |          |   |          |          |          |   |          |          |          |   |          |         |          |   |         |          |          |   |         |          |          |   |         |          |          |   |         |          |          |   |         |          |          |   |         |          |          |   |         |          |          |   |         |          |          |   |         |         |          |   |         |         |          |   |         |         |          |   |         |         |          |   |         |         |          |   |          |          |         |   |          |         |         |   |          |         |         |   |          |         |         |   |          |         |         |   |          |          |         |   |          |          |         |   |          |          |         |   |          |          |         |
| H                                                                                                                                                                                                                     | 2.98793                                                                                                                                                                                                                                                                                                                                                                                                                                                                                                                                                                                                                                                                                                                                                                                                                                                                                                                                                                                                                                                                                                                                                                                                                                                                                                                                                                                                                                                                                                                                                                                                                                                                                                                                                                                                                                                                                                                                                                                                                                                                                                                                                                                                                                                                                                                                                                                                                                                                                                                                                                                                                                                                                                                                                                                                                                                                                                                                                                                                                                                                            | -0.95638 | -0.38295 |         |          |   |          |         |          |   |          |          |          |   |          |         |          |   |          |         |          |   |          |          |          |   |          |          |          |   |          |         |          |   |          |         |         |   |          |         |         |   |         |         |         |   |          |         |         |   |          |         |         |   |         |         |         |   |          |         |         |   |          |         |         |   |         |         |         |   |          |         |          |   |          |         |          |   |          |         |         |   |         |         |          |   |         |          |          |   |         |          |          |   |         |          |          |   |         |          |         |   |         |         |         |   |         |         |         |   |          |         |         |   |          |         |         |   |          |         |          |   |          |         |          |                                                                                                                                                                                                                       |                                                                                                                                                                                                                                                                                                                                                                                                                                                                                                                                                                                                                                                                                                                                                                                                                                                                                                                                                                                                                                                                                                                                                                                                                                                                                                                                                                                                                                                                                                                                                                                                                                                                                                                                                                                                                                                                                                                                                                                                                                                                                                                                                                                                                                                                                |         |          |          |          |         |          |          |          |          |          |          |          |          |         |          |          |          |          |         |          |          |         |          |          |          |         |          |          |          |          |         |          |          |          |         |         |          |          |         |          |          |          |                                                                                                                                                                                                                        |                                                                                                                                                                                                                                                                                                                                                                                                                                                                                                                                                                                                                                                                                                                                                                                                                                                                                                                                                                                                                                                                                                                                                                                                                                                                                                                                                                                                                                                                                                                                                                                                                                                                                                                                                                                                                                                                                                                                                                                                                                                                                                                                                                                                                                                                                                                                                                                                                                                                                                                                                                                                                                                                                                                                                                                                                                                                                                                                                                                                                                                                                      |   |          |          |          |   |          |         |          |   |          |          |          |   |          |         |          |   |          |         |          |   |          |          |          |   |          |          |          |   |         |         |          |   |          |         |          |   |          |         |          |   |          |         |          |   |          |          |         |   |          |          |         |   |         |          |         |   |          |          |         |   |         |          |         |   |         |          |          |   |          |          |          |   |          |          |          |   |          |         |          |   |         |          |          |   |         |          |          |   |         |          |          |   |         |          |          |   |         |          |          |   |         |          |          |   |         |          |          |   |         |          |          |   |         |         |          |   |         |         |          |   |         |         |          |   |         |         |          |   |         |         |          |   |          |          |         |   |          |         |         |   |          |         |         |   |          |         |         |   |          |         |         |   |          |          |         |   |          |          |         |   |          |          |         |   |          |          |         |
| H                                                                                                                                                                                                                     | 1.22014                                                                                                                                                                                                                                                                                                                                                                                                                                                                                                                                                                                                                                                                                                                                                                                                                                                                                                                                                                                                                                                                                                                                                                                                                                                                                                                                                                                                                                                                                                                                                                                                                                                                                                                                                                                                                                                                                                                                                                                                                                                                                                                                                                                                                                                                                                                                                                                                                                                                                                                                                                                                                                                                                                                                                                                                                                                                                                                                                                                                                                                                            | -1.30619 | -0.21446 |         |          |   |          |         |          |   |          |          |          |   |          |         |          |   |          |         |          |   |          |          |          |   |          |          |          |   |          |         |          |   |          |         |         |   |          |         |         |   |         |         |         |   |          |         |         |   |          |         |         |   |         |         |         |   |          |         |         |   |          |         |         |   |         |         |         |   |          |         |          |   |          |         |          |   |          |         |         |   |         |         |          |   |         |          |          |   |         |          |          |   |         |          |          |   |         |          |         |   |         |         |         |   |         |         |         |   |          |         |         |   |          |         |         |   |          |         |          |   |          |         |          |                                                                                                                                                                                                                       |                                                                                                                                                                                                                                                                                                                                                                                                                                                                                                                                                                                                                                                                                                                                                                                                                                                                                                                                                                                                                                                                                                                                                                                                                                                                                                                                                                                                                                                                                                                                                                                                                                                                                                                                                                                                                                                                                                                                                                                                                                                                                                                                                                                                                                                                                |         |          |          |          |         |          |          |          |          |          |          |          |          |         |          |          |          |          |         |          |          |         |          |          |          |         |          |          |          |          |         |          |          |          |         |         |          |          |         |          |          |          |                                                                                                                                                                                                                        |                                                                                                                                                                                                                                                                                                                                                                                                                                                                                                                                                                                                                                                                                                                                                                                                                                                                                                                                                                                                                                                                                                                                                                                                                                                                                                                                                                                                                                                                                                                                                                                                                                                                                                                                                                                                                                                                                                                                                                                                                                                                                                                                                                                                                                                                                                                                                                                                                                                                                                                                                                                                                                                                                                                                                                                                                                                                                                                                                                                                                                                                                      |   |          |          |          |   |          |         |          |   |          |          |          |   |          |         |          |   |          |         |          |   |          |          |          |   |          |          |          |   |         |         |          |   |          |         |          |   |          |         |          |   |          |         |          |   |          |          |         |   |          |          |         |   |         |          |         |   |          |          |         |   |         |          |         |   |         |          |          |   |          |          |          |   |          |          |          |   |          |         |          |   |         |          |          |   |         |          |          |   |         |          |          |   |         |          |          |   |         |          |          |   |         |          |          |   |         |          |          |   |         |          |          |   |         |         |          |   |         |         |          |   |         |         |          |   |         |         |          |   |         |         |          |   |          |          |         |   |          |         |         |   |          |         |         |   |          |         |         |   |          |         |         |   |          |          |         |   |          |          |         |   |          |          |         |   |          |          |         |
| H                                                                                                                                                                                                                     | 2.30340                                                                                                                                                                                                                                                                                                                                                                                                                                                                                                                                                                                                                                                                                                                                                                                                                                                                                                                                                                                                                                                                                                                                                                                                                                                                                                                                                                                                                                                                                                                                                                                                                                                                                                                                                                                                                                                                                                                                                                                                                                                                                                                                                                                                                                                                                                                                                                                                                                                                                                                                                                                                                                                                                                                                                                                                                                                                                                                                                                                                                                                                            | -1.42989 | 1.19947  |         |          |   |          |         |          |   |          |          |          |   |          |         |          |   |          |         |          |   |          |          |          |   |          |          |          |   |          |         |          |   |          |         |         |   |          |         |         |   |         |         |         |   |          |         |         |   |          |         |         |   |         |         |         |   |          |         |         |   |          |         |         |   |         |         |         |   |          |         |          |   |          |         |          |   |          |         |         |   |         |         |          |   |         |          |          |   |         |          |          |   |         |          |          |   |         |          |         |   |         |         |         |   |         |         |         |   |          |         |         |   |          |         |         |   |          |         |          |   |          |         |          |                                                                                                                                                                                                                       |                                                                                                                                                                                                                                                                                                                                                                                                                                                                                                                                                                                                                                                                                                                                                                                                                                                                                                                                                                                                                                                                                                                                                                                                                                                                                                                                                                                                                                                                                                                                                                                                                                                                                                                                                                                                                                                                                                                                                                                                                                                                                                                                                                                                                                                                                |         |          |          |          |         |          |          |          |          |          |          |          |          |         |          |          |          |          |         |          |          |         |          |          |          |         |          |          |          |          |         |          |          |          |         |         |          |          |         |          |          |          |                                                                                                                                                                                                                        |                                                                                                                                                                                                                                                                                                                                                                                                                                                                                                                                                                                                                                                                                                                                                                                                                                                                                                                                                                                                                                                                                                                                                                                                                                                                                                                                                                                                                                                                                                                                                                                                                                                                                                                                                                                                                                                                                                                                                                                                                                                                                                                                                                                                                                                                                                                                                                                                                                                                                                                                                                                                                                                                                                                                                                                                                                                                                                                                                                                                                                                                                      |   |          |          |          |   |          |         |          |   |          |          |          |   |          |         |          |   |          |         |          |   |          |          |          |   |          |          |          |   |         |         |          |   |          |         |          |   |          |         |          |   |          |         |          |   |          |          |         |   |          |          |         |   |         |          |         |   |          |          |         |   |         |          |         |   |         |          |          |   |          |          |          |   |          |          |          |   |          |         |          |   |         |          |          |   |         |          |          |   |         |          |          |   |         |          |          |   |         |          |          |   |         |          |          |   |         |          |          |   |         |          |          |   |         |         |          |   |         |         |          |   |         |         |          |   |         |         |          |   |         |         |          |   |          |          |         |   |          |         |         |   |          |         |         |   |          |         |         |   |          |         |         |   |          |          |         |   |          |          |         |   |          |          |         |   |          |          |         |
| C                                                                                                                                                                                                                     | 3.07107                                                                                                                                                                                                                                                                                                                                                                                                                                                                                                                                                                                                                                                                                                                                                                                                                                                                                                                                                                                                                                                                                                                                                                                                                                                                                                                                                                                                                                                                                                                                                                                                                                                                                                                                                                                                                                                                                                                                                                                                                                                                                                                                                                                                                                                                                                                                                                                                                                                                                                                                                                                                                                                                                                                                                                                                                                                                                                                                                                                                                                                                            | 1.06170  | 1.33001  |         |          |   |          |         |          |   |          |          |          |   |          |         |          |   |          |         |          |   |          |          |          |   |          |          |          |   |          |         |          |   |          |         |         |   |          |         |         |   |         |         |         |   |          |         |         |   |          |         |         |   |         |         |         |   |          |         |         |   |          |         |         |   |         |         |         |   |          |         |          |   |          |         |          |   |          |         |         |   |         |         |          |   |         |          |          |   |         |          |          |   |         |          |          |   |         |          |         |   |         |         |         |   |         |         |         |   |          |         |         |   |          |         |         |   |          |         |          |   |          |         |          |                                                                                                                                                                                                                       |                                                                                                                                                                                                                                                                                                                                                                                                                                                                                                                                                                                                                                                                                                                                                                                                                                                                                                                                                                                                                                                                                                                                                                                                                                                                                                                                                                                                                                                                                                                                                                                                                                                                                                                                                                                                                                                                                                                                                                                                                                                                                                                                                                                                                                                                                |         |          |          |          |         |          |          |          |          |          |          |          |          |         |          |          |          |          |         |          |          |         |          |          |          |         |          |          |          |          |         |          |          |          |         |         |          |          |         |          |          |          |                                                                                                                                                                                                                        |                                                                                                                                                                                                                                                                                                                                                                                                                                                                                                                                                                                                                                                                                                                                                                                                                                                                                                                                                                                                                                                                                                                                                                                                                                                                                                                                                                                                                                                                                                                                                                                                                                                                                                                                                                                                                                                                                                                                                                                                                                                                                                                                                                                                                                                                                                                                                                                                                                                                                                                                                                                                                                                                                                                                                                                                                                                                                                                                                                                                                                                                                      |   |          |          |          |   |          |         |          |   |          |          |          |   |          |         |          |   |          |         |          |   |          |          |          |   |          |          |          |   |         |         |          |   |          |         |          |   |          |         |          |   |          |         |          |   |          |          |         |   |          |          |         |   |         |          |         |   |          |          |         |   |         |          |         |   |         |          |          |   |          |          |          |   |          |          |          |   |          |         |          |   |         |          |          |   |         |          |          |   |         |          |          |   |         |          |          |   |         |          |          |   |         |          |          |   |         |          |          |   |         |          |          |   |         |         |          |   |         |         |          |   |         |         |          |   |         |         |          |   |         |         |          |   |          |          |         |   |          |         |         |   |          |         |         |   |          |         |         |   |          |         |         |   |          |          |         |   |          |          |         |   |          |          |         |   |          |          |         |
| H                                                                                                                                                                                                                     | 3.90165                                                                                                                                                                                                                                                                                                                                                                                                                                                                                                                                                                                                                                                                                                                                                                                                                                                                                                                                                                                                                                                                                                                                                                                                                                                                                                                                                                                                                                                                                                                                                                                                                                                                                                                                                                                                                                                                                                                                                                                                                                                                                                                                                                                                                                                                                                                                                                                                                                                                                                                                                                                                                                                                                                                                                                                                                                                                                                                                                                                                                                                                            | 1.04606  | 0.63009  |         |          |   |          |         |          |   |          |          |          |   |          |         |          |   |          |         |          |   |          |          |          |   |          |          |          |   |          |         |          |   |          |         |         |   |          |         |         |   |         |         |         |   |          |         |         |   |          |         |         |   |         |         |         |   |          |         |         |   |          |         |         |   |         |         |         |   |          |         |          |   |          |         |          |   |          |         |         |   |         |         |          |   |         |          |          |   |         |          |          |   |         |          |          |   |         |          |         |   |         |         |         |   |         |         |         |   |          |         |         |   |          |         |         |   |          |         |          |   |          |         |          |                                                                                                                                                                                                                       |                                                                                                                                                                                                                                                                                                                                                                                                                                                                                                                                                                                                                                                                                                                                                                                                                                                                                                                                                                                                                                                                                                                                                                                                                                                                                                                                                                                                                                                                                                                                                                                                                                                                                                                                                                                                                                                                                                                                                                                                                                                                                                                                                                                                                                                                                |         |          |          |          |         |          |          |          |          |          |          |          |          |         |          |          |          |          |         |          |          |         |          |          |          |         |          |          |          |          |         |          |          |          |         |         |          |          |         |          |          |          |                                                                                                                                                                                                                        |                                                                                                                                                                                                                                                                                                                                                                                                                                                                                                                                                                                                                                                                                                                                                                                                                                                                                                                                                                                                                                                                                                                                                                                                                                                                                                                                                                                                                                                                                                                                                                                                                                                                                                                                                                                                                                                                                                                                                                                                                                                                                                                                                                                                                                                                                                                                                                                                                                                                                                                                                                                                                                                                                                                                                                                                                                                                                                                                                                                                                                                                                      |   |          |          |          |   |          |         |          |   |          |          |          |   |          |         |          |   |          |         |          |   |          |          |          |   |          |          |          |   |         |         |          |   |          |         |          |   |          |         |          |   |          |         |          |   |          |          |         |   |          |          |         |   |         |          |         |   |          |          |         |   |         |          |         |   |         |          |          |   |          |          |          |   |          |          |          |   |          |         |          |   |         |          |          |   |         |          |          |   |         |          |          |   |         |          |          |   |         |          |          |   |         |          |          |   |         |          |          |   |         |          |          |   |         |         |          |   |         |         |          |   |         |         |          |   |         |         |          |   |         |         |          |   |          |          |         |   |          |         |         |   |          |         |         |   |          |         |         |   |          |         |         |   |          |          |         |   |          |          |         |   |          |          |         |   |          |          |         |
| H                                                                                                                                                                                                                     | 3.30556                                                                                                                                                                                                                                                                                                                                                                                                                                                                                                                                                                                                                                                                                                                                                                                                                                                                                                                                                                                                                                                                                                                                                                                                                                                                                                                                                                                                                                                                                                                                                                                                                                                                                                                                                                                                                                                                                                                                                                                                                                                                                                                                                                                                                                                                                                                                                                                                                                                                                                                                                                                                                                                                                                                                                                                                                                                                                                                                                                                                                                                                            | 0.41054  | 2.16393  |         |          |   |          |         |          |   |          |          |          |   |          |         |          |   |          |         |          |   |          |          |          |   |          |          |          |   |          |         |          |   |          |         |         |   |          |         |         |   |         |         |         |   |          |         |         |   |          |         |         |   |         |         |         |   |          |         |         |   |          |         |         |   |         |         |         |   |          |         |          |   |          |         |          |   |          |         |         |   |         |         |          |   |         |          |          |   |         |          |          |   |         |          |          |   |         |          |         |   |         |         |         |   |         |         |         |   |          |         |         |   |          |         |         |   |          |         |          |   |          |         |          |                                                                                                                                                                                                                       |                                                                                                                                                                                                                                                                                                                                                                                                                                                                                                                                                                                                                                                                                                                                                                                                                                                                                                                                                                                                                                                                                                                                                                                                                                                                                                                                                                                                                                                                                                                                                                                                                                                                                                                                                                                                                                                                                                                                                                                                                                                                                                                                                                                                                                                                                |         |          |          |          |         |          |          |          |          |          |          |          |          |         |          |          |          |          |         |          |          |         |          |          |          |         |          |          |          |          |         |          |          |          |         |         |          |          |         |          |          |          |                                                                                                                                                                                                                        |                                                                                                                                                                                                                                                                                                                                                                                                                                                                                                                                                                                                                                                                                                                                                                                                                                                                                                                                                                                                                                                                                                                                                                                                                                                                                                                                                                                                                                                                                                                                                                                                                                                                                                                                                                                                                                                                                                                                                                                                                                                                                                                                                                                                                                                                                                                                                                                                                                                                                                                                                                                                                                                                                                                                                                                                                                                                                                                                                                                                                                                                                      |   |          |          |          |   |          |         |          |   |          |          |          |   |          |         |          |   |          |         |          |   |          |          |          |   |          |          |          |   |         |         |          |   |          |         |          |   |          |         |          |   |          |         |          |   |          |          |         |   |          |          |         |   |         |          |         |   |          |          |         |   |         |          |         |   |         |          |          |   |          |          |          |   |          |          |          |   |          |         |          |   |         |          |          |   |         |          |          |   |         |          |          |   |         |          |          |   |         |          |          |   |         |          |          |   |         |          |          |   |         |          |          |   |         |         |          |   |         |         |          |   |         |         |          |   |         |         |          |   |         |         |          |   |          |          |         |   |          |         |         |   |          |         |         |   |          |         |         |   |          |         |         |   |          |          |         |   |          |          |         |   |          |          |         |   |          |          |         |
| H                                                                                                                                                                                                                     | 2.87324                                                                                                                                                                                                                                                                                                                                                                                                                                                                                                                                                                                                                                                                                                                                                                                                                                                                                                                                                                                                                                                                                                                                                                                                                                                                                                                                                                                                                                                                                                                                                                                                                                                                                                                                                                                                                                                                                                                                                                                                                                                                                                                                                                                                                                                                                                                                                                                                                                                                                                                                                                                                                                                                                                                                                                                                                                                                                                                                                                                                                                                                            | 2.07474  | 1.66886  |         |          |   |          |         |          |   |          |          |          |   |          |         |          |   |          |         |          |   |          |          |          |   |          |          |          |   |          |         |          |   |          |         |         |   |          |         |         |   |         |         |         |   |          |         |         |   |          |         |         |   |         |         |         |   |          |         |         |   |          |         |         |   |         |         |         |   |          |         |          |   |          |         |          |   |          |         |         |   |         |         |          |   |         |          |          |   |         |          |          |   |         |          |          |   |         |          |         |   |         |         |         |   |         |         |         |   |          |         |         |   |          |         |         |   |          |         |          |   |          |         |          |                                                                                                                                                                                                                       |                                                                                                                                                                                                                                                                                                                                                                                                                                                                                                                                                                                                                                                                                                                                                                                                                                                                                                                                                                                                                                                                                                                                                                                                                                                                                                                                                                                                                                                                                                                                                                                                                                                                                                                                                                                                                                                                                                                                                                                                                                                                                                                                                                                                                                                                                |         |          |          |          |         |          |          |          |          |          |          |          |          |         |          |          |          |          |         |          |          |         |          |          |          |         |          |          |          |          |         |          |          |          |         |         |          |          |         |          |          |          |                                                                                                                                                                                                                        |                                                                                                                                                                                                                                                                                                                                                                                                                                                                                                                                                                                                                                                                                                                                                                                                                                                                                                                                                                                                                                                                                                                                                                                                                                                                                                                                                                                                                                                                                                                                                                                                                                                                                                                                                                                                                                                                                                                                                                                                                                                                                                                                                                                                                                                                                                                                                                                                                                                                                                                                                                                                                                                                                                                                                                                                                                                                                                                                                                                                                                                                                      |   |          |          |          |   |          |         |          |   |          |          |          |   |          |         |          |   |          |         |          |   |          |          |          |   |          |          |          |   |         |         |          |   |          |         |          |   |          |         |          |   |          |         |          |   |          |          |         |   |          |          |         |   |         |          |         |   |          |          |         |   |         |          |         |   |         |          |          |   |          |          |          |   |          |          |          |   |          |         |          |   |         |          |          |   |         |          |          |   |         |          |          |   |         |          |          |   |         |          |          |   |         |          |          |   |         |          |          |   |         |          |          |   |         |         |          |   |         |         |          |   |         |         |          |   |         |         |          |   |         |         |          |   |          |          |         |   |          |         |         |   |          |         |         |   |          |         |         |   |          |         |         |   |          |          |         |   |          |          |         |   |          |          |         |   |          |          |         |
| C                                                                                                                                                                                                                     | 1.78831                                                                                                                                                                                                                                                                                                                                                                                                                                                                                                                                                                                                                                                                                                                                                                                                                                                                                                                                                                                                                                                                                                                                                                                                                                                                                                                                                                                                                                                                                                                                                                                                                                                                                                                                                                                                                                                                                                                                                                                                                                                                                                                                                                                                                                                                                                                                                                                                                                                                                                                                                                                                                                                                                                                                                                                                                                                                                                                                                                                                                                                                            | 1.34347  | -0.68354 |         |          |   |          |         |          |   |          |          |          |   |          |         |          |   |          |         |          |   |          |          |          |   |          |          |          |   |          |         |          |   |          |         |         |   |          |         |         |   |         |         |         |   |          |         |         |   |          |         |         |   |         |         |         |   |          |         |         |   |          |         |         |   |         |         |         |   |          |         |          |   |          |         |          |   |          |         |         |   |         |         |          |   |         |          |          |   |         |          |          |   |         |          |          |   |         |          |         |   |         |         |         |   |         |         |         |   |          |         |         |   |          |         |         |   |          |         |          |   |          |         |          |                                                                                                                                                                                                                       |                                                                                                                                                                                                                                                                                                                                                                                                                                                                                                                                                                                                                                                                                                                                                                                                                                                                                                                                                                                                                                                                                                                                                                                                                                                                                                                                                                                                                                                                                                                                                                                                                                                                                                                                                                                                                                                                                                                                                                                                                                                                                                                                                                                                                                                                                |         |          |          |          |         |          |          |          |          |          |          |          |          |         |          |          |          |          |         |          |          |         |          |          |          |         |          |          |          |          |         |          |          |          |         |         |          |          |         |          |          |          |                                                                                                                                                                                                                        |                                                                                                                                                                                                                                                                                                                                                                                                                                                                                                                                                                                                                                                                                                                                                                                                                                                                                                                                                                                                                                                                                                                                                                                                                                                                                                                                                                                                                                                                                                                                                                                                                                                                                                                                                                                                                                                                                                                                                                                                                                                                                                                                                                                                                                                                                                                                                                                                                                                                                                                                                                                                                                                                                                                                                                                                                                                                                                                                                                                                                                                                                      |   |          |          |          |   |          |         |          |   |          |          |          |   |          |         |          |   |          |         |          |   |          |          |          |   |          |          |          |   |         |         |          |   |          |         |          |   |          |         |          |   |          |         |          |   |          |          |         |   |          |          |         |   |         |          |         |   |          |          |         |   |         |          |         |   |         |          |          |   |          |          |          |   |          |          |          |   |          |         |          |   |         |          |          |   |         |          |          |   |         |          |          |   |         |          |          |   |         |          |          |   |         |          |          |   |         |          |          |   |         |          |          |   |         |         |          |   |         |         |          |   |         |         |          |   |         |         |          |   |         |         |          |   |          |          |         |   |          |         |         |   |          |         |         |   |          |         |         |   |          |         |         |   |          |          |         |   |          |          |         |   |          |          |         |   |          |          |         |
| H                                                                                                                                                                                                                     | 2.77742                                                                                                                                                                                                                                                                                                                                                                                                                                                                                                                                                                                                                                                                                                                                                                                                                                                                                                                                                                                                                                                                                                                                                                                                                                                                                                                                                                                                                                                                                                                                                                                                                                                                                                                                                                                                                                                                                                                                                                                                                                                                                                                                                                                                                                                                                                                                                                                                                                                                                                                                                                                                                                                                                                                                                                                                                                                                                                                                                                                                                                                                            | 1.32463  | -1.13381 |         |          |   |          |         |          |   |          |          |          |   |          |         |          |   |          |         |          |   |          |          |          |   |          |          |          |   |          |         |          |   |          |         |         |   |          |         |         |   |         |         |         |   |          |         |         |   |          |         |         |   |         |         |         |   |          |         |         |   |          |         |         |   |         |         |         |   |          |         |          |   |          |         |          |   |          |         |         |   |         |         |          |   |         |          |          |   |         |          |          |   |         |          |          |   |         |          |         |   |         |         |         |   |         |         |         |   |          |         |         |   |          |         |         |   |          |         |          |   |          |         |          |                                                                                                                                                                                                                       |                                                                                                                                                                                                                                                                                                                                                                                                                                                                                                                                                                                                                                                                                                                                                                                                                                                                                                                                                                                                                                                                                                                                                                                                                                                                                                                                                                                                                                                                                                                                                                                                                                                                                                                                                                                                                                                                                                                                                                                                                                                                                                                                                                                                                                                                                |         |          |          |          |         |          |          |          |          |          |          |          |          |         |          |          |          |          |         |          |          |         |          |          |          |         |          |          |          |          |         |          |          |          |         |         |          |          |         |          |          |          |                                                                                                                                                                                                                        |                                                                                                                                                                                                                                                                                                                                                                                                                                                                                                                                                                                                                                                                                                                                                                                                                                                                                                                                                                                                                                                                                                                                                                                                                                                                                                                                                                                                                                                                                                                                                                                                                                                                                                                                                                                                                                                                                                                                                                                                                                                                                                                                                                                                                                                                                                                                                                                                                                                                                                                                                                                                                                                                                                                                                                                                                                                                                                                                                                                                                                                                                      |   |          |          |          |   |          |         |          |   |          |          |          |   |          |         |          |   |          |         |          |   |          |          |          |   |          |          |          |   |         |         |          |   |          |         |          |   |          |         |          |   |          |         |          |   |          |          |         |   |          |          |         |   |         |          |         |   |          |          |         |   |         |          |         |   |         |          |          |   |          |          |          |   |          |          |          |   |          |         |          |   |         |          |          |   |         |          |          |   |         |          |          |   |         |          |          |   |         |          |          |   |         |          |          |   |         |          |          |   |         |          |          |   |         |         |          |   |         |         |          |   |         |         |          |   |         |         |          |   |         |         |          |   |          |          |         |   |          |         |         |   |          |         |         |   |          |         |         |   |          |         |         |   |          |          |         |   |          |          |         |   |          |          |         |   |          |          |         |
| H                                                                                                                                                                                                                     | 1.49716                                                                                                                                                                                                                                                                                                                                                                                                                                                                                                                                                                                                                                                                                                                                                                                                                                                                                                                                                                                                                                                                                                                                                                                                                                                                                                                                                                                                                                                                                                                                                                                                                                                                                                                                                                                                                                                                                                                                                                                                                                                                                                                                                                                                                                                                                                                                                                                                                                                                                                                                                                                                                                                                                                                                                                                                                                                                                                                                                                                                                                                                            | 2.35975  | -0.43390 |         |          |   |          |         |          |   |          |          |          |   |          |         |          |   |          |         |          |   |          |          |          |   |          |          |          |   |          |         |          |   |          |         |         |   |          |         |         |   |         |         |         |   |          |         |         |   |          |         |         |   |         |         |         |   |          |         |         |   |          |         |         |   |         |         |         |   |          |         |          |   |          |         |          |   |          |         |         |   |         |         |          |   |         |          |          |   |         |          |          |   |         |          |          |   |         |          |         |   |         |         |         |   |         |         |         |   |          |         |         |   |          |         |         |   |          |         |          |   |          |         |          |                                                                                                                                                                                                                       |                                                                                                                                                                                                                                                                                                                                                                                                                                                                                                                                                                                                                                                                                                                                                                                                                                                                                                                                                                                                                                                                                                                                                                                                                                                                                                                                                                                                                                                                                                                                                                                                                                                                                                                                                                                                                                                                                                                                                                                                                                                                                                                                                                                                                                                                                |         |          |          |          |         |          |          |          |          |          |          |          |          |         |          |          |          |          |         |          |          |         |          |          |          |         |          |          |          |          |         |          |          |          |         |         |          |          |         |          |          |          |                                                                                                                                                                                                                        |                                                                                                                                                                                                                                                                                                                                                                                                                                                                                                                                                                                                                                                                                                                                                                                                                                                                                                                                                                                                                                                                                                                                                                                                                                                                                                                                                                                                                                                                                                                                                                                                                                                                                                                                                                                                                                                                                                                                                                                                                                                                                                                                                                                                                                                                                                                                                                                                                                                                                                                                                                                                                                                                                                                                                                                                                                                                                                                                                                                                                                                                                      |   |          |          |          |   |          |         |          |   |          |          |          |   |          |         |          |   |          |         |          |   |          |          |          |   |          |          |          |   |         |         |          |   |          |         |          |   |          |         |          |   |          |         |          |   |          |          |         |   |          |          |         |   |         |          |         |   |          |          |         |   |         |          |         |   |         |          |          |   |          |          |          |   |          |          |          |   |          |         |          |   |         |          |          |   |         |          |          |   |         |          |          |   |         |          |          |   |         |          |          |   |         |          |          |   |         |          |          |   |         |          |          |   |         |         |          |   |         |         |          |   |         |         |          |   |         |         |          |   |         |         |          |   |          |          |         |   |          |         |         |   |          |         |         |   |          |         |         |   |          |         |         |   |          |          |         |   |          |          |         |   |          |          |         |   |          |          |         |
| H                                                                                                                                                                                                                     | 1.06560                                                                                                                                                                                                                                                                                                                                                                                                                                                                                                                                                                                                                                                                                                                                                                                                                                                                                                                                                                                                                                                                                                                                                                                                                                                                                                                                                                                                                                                                                                                                                                                                                                                                                                                                                                                                                                                                                                                                                                                                                                                                                                                                                                                                                                                                                                                                                                                                                                                                                                                                                                                                                                                                                                                                                                                                                                                                                                                                                                                                                                                                            | 0.90034  | -1.35293 |         |          |   |          |         |          |   |          |          |          |   |          |         |          |   |          |         |          |   |          |          |          |   |          |          |          |   |          |         |          |   |          |         |         |   |          |         |         |   |         |         |         |   |          |         |         |   |          |         |         |   |         |         |         |   |          |         |         |   |          |         |         |   |         |         |         |   |          |         |          |   |          |         |          |   |          |         |         |   |         |         |          |   |         |          |          |   |         |          |          |   |         |          |          |   |         |          |         |   |         |         |         |   |         |         |         |   |          |         |         |   |          |         |         |   |          |         |          |   |          |         |          |                                                                                                                                                                                                                       |                                                                                                                                                                                                                                                                                                                                                                                                                                                                                                                                                                                                                                                                                                                                                                                                                                                                                                                                                                                                                                                                                                                                                                                                                                                                                                                                                                                                                                                                                                                                                                                                                                                                                                                                                                                                                                                                                                                                                                                                                                                                                                                                                                                                                                                                                |         |          |          |          |         |          |          |          |          |          |          |          |          |         |          |          |          |          |         |          |          |         |          |          |          |         |          |          |          |          |         |          |          |          |         |         |          |          |         |          |          |          |                                                                                                                                                                                                                        |                                                                                                                                                                                                                                                                                                                                                                                                                                                                                                                                                                                                                                                                                                                                                                                                                                                                                                                                                                                                                                                                                                                                                                                                                                                                                                                                                                                                                                                                                                                                                                                                                                                                                                                                                                                                                                                                                                                                                                                                                                                                                                                                                                                                                                                                                                                                                                                                                                                                                                                                                                                                                                                                                                                                                                                                                                                                                                                                                                                                                                                                                      |   |          |          |          |   |          |         |          |   |          |          |          |   |          |         |          |   |          |         |          |   |          |          |          |   |          |          |          |   |         |         |          |   |          |         |          |   |          |         |          |   |          |         |          |   |          |          |         |   |          |          |         |   |         |          |         |   |          |          |         |   |         |          |         |   |         |          |          |   |          |          |          |   |          |          |          |   |          |         |          |   |         |          |          |   |         |          |          |   |         |          |          |   |         |          |          |   |         |          |          |   |         |          |          |   |         |          |          |   |         |          |          |   |         |         |          |   |         |         |          |   |         |         |          |   |         |         |          |   |         |         |          |   |          |          |         |   |          |         |         |   |          |         |         |   |          |         |         |   |          |         |         |   |          |          |         |   |          |          |         |   |          |          |         |   |          |          |         |
| N                                                                                                                                                                                                                     | -0.68980                                                                                                                                                                                                                                                                                                                                                                                                                                                                                                                                                                                                                                                                                                                                                                                                                                                                                                                                                                                                                                                                                                                                                                                                                                                                                                                                                                                                                                                                                                                                                                                                                                                                                                                                                                                                                                                                                                                                                                                                                                                                                                                                                                                                                                                                                                                                                                                                                                                                                                                                                                                                                                                                                                                                                                                                                                                                                                                                                                                                                                                                           | -1.79204 | -0.85023 |         |          |   |          |         |          |   |          |          |          |   |          |         |          |   |          |         |          |   |          |          |          |   |          |          |          |   |          |         |          |   |          |         |         |   |          |         |         |   |         |         |         |   |          |         |         |   |          |         |         |   |         |         |         |   |          |         |         |   |          |         |         |   |         |         |         |   |          |         |          |   |          |         |          |   |          |         |         |   |         |         |          |   |         |          |          |   |         |          |          |   |         |          |          |   |         |          |         |   |         |         |         |   |         |         |         |   |          |         |         |   |          |         |         |   |          |         |          |   |          |         |          |                                                                                                                                                                                                                       |                                                                                                                                                                                                                                                                                                                                                                                                                                                                                                                                                                                                                                                                                                                                                                                                                                                                                                                                                                                                                                                                                                                                                                                                                                                                                                                                                                                                                                                                                                                                                                                                                                                                                                                                                                                                                                                                                                                                                                                                                                                                                                                                                                                                                                                                                |         |          |          |          |         |          |          |          |          |          |          |          |          |         |          |          |          |          |         |          |          |         |          |          |          |         |          |          |          |          |         |          |          |          |         |         |          |          |         |          |          |          |                                                                                                                                                                                                                        |                                                                                                                                                                                                                                                                                                                                                                                                                                                                                                                                                                                                                                                                                                                                                                                                                                                                                                                                                                                                                                                                                                                                                                                                                                                                                                                                                                                                                                                                                                                                                                                                                                                                                                                                                                                                                                                                                                                                                                                                                                                                                                                                                                                                                                                                                                                                                                                                                                                                                                                                                                                                                                                                                                                                                                                                                                                                                                                                                                                                                                                                                      |   |          |          |          |   |          |         |          |   |          |          |          |   |          |         |          |   |          |         |          |   |          |          |          |   |          |          |          |   |         |         |          |   |          |         |          |   |          |         |          |   |          |         |          |   |          |          |         |   |          |          |         |   |         |          |         |   |          |          |         |   |         |          |         |   |         |          |          |   |          |          |          |   |          |          |          |   |          |         |          |   |         |          |          |   |         |          |          |   |         |          |          |   |         |          |          |   |         |          |          |   |         |          |          |   |         |          |          |   |         |          |          |   |         |         |          |   |         |         |          |   |         |         |          |   |         |         |          |   |         |         |          |   |          |          |         |   |          |         |         |   |          |         |         |   |          |         |         |   |          |         |         |   |          |          |         |   |          |          |         |   |          |          |         |   |          |          |         |
| C                                                                                                                                                                                                                     | -1.61652                                                                                                                                                                                                                                                                                                                                                                                                                                                                                                                                                                                                                                                                                                                                                                                                                                                                                                                                                                                                                                                                                                                                                                                                                                                                                                                                                                                                                                                                                                                                                                                                                                                                                                                                                                                                                                                                                                                                                                                                                                                                                                                                                                                                                                                                                                                                                                                                                                                                                                                                                                                                                                                                                                                                                                                                                                                                                                                                                                                                                                                                           | -2.34340 | 0.14446  |         |          |   |          |         |          |   |          |          |          |   |          |         |          |   |          |         |          |   |          |          |          |   |          |          |          |   |          |         |          |   |          |         |         |   |          |         |         |   |         |         |         |   |          |         |         |   |          |         |         |   |         |         |         |   |          |         |         |   |          |         |         |   |         |         |         |   |          |         |          |   |          |         |          |   |          |         |         |   |         |         |          |   |         |          |          |   |         |          |          |   |         |          |          |   |         |          |         |   |         |         |         |   |         |         |         |   |          |         |         |   |          |         |         |   |          |         |          |   |          |         |          |                                                                                                                                                                                                                       |                                                                                                                                                                                                                                                                                                                                                                                                                                                                                                                                                                                                                                                                                                                                                                                                                                                                                                                                                                                                                                                                                                                                                                                                                                                                                                                                                                                                                                                                                                                                                                                                                                                                                                                                                                                                                                                                                                                                                                                                                                                                                                                                                                                                                                                                                |         |          |          |          |         |          |          |          |          |          |          |          |          |         |          |          |          |          |         |          |          |         |          |          |          |         |          |          |          |          |         |          |          |          |         |         |          |          |         |          |          |          |                                                                                                                                                                                                                        |                                                                                                                                                                                                                                                                                                                                                                                                                                                                                                                                                                                                                                                                                                                                                                                                                                                                                                                                                                                                                                                                                                                                                                                                                                                                                                                                                                                                                                                                                                                                                                                                                                                                                                                                                                                                                                                                                                                                                                                                                                                                                                                                                                                                                                                                                                                                                                                                                                                                                                                                                                                                                                                                                                                                                                                                                                                                                                                                                                                                                                                                                      |   |          |          |          |   |          |         |          |   |          |          |          |   |          |         |          |   |          |         |          |   |          |          |          |   |          |          |          |   |         |         |          |   |          |         |          |   |          |         |          |   |          |         |          |   |          |          |         |   |          |          |         |   |         |          |         |   |          |          |         |   |         |          |         |   |         |          |          |   |          |          |          |   |          |          |          |   |          |         |          |   |         |          |          |   |         |          |          |   |         |          |          |   |         |          |          |   |         |          |          |   |         |          |          |   |         |          |          |   |         |          |          |   |         |         |          |   |         |         |          |   |         |         |          |   |         |         |          |   |         |         |          |   |          |          |         |   |          |         |         |   |          |         |         |   |          |         |         |   |          |         |         |   |          |          |         |   |          |          |         |   |          |          |         |   |          |          |         |
| H                                                                                                                                                                                                                     | -2.53821                                                                                                                                                                                                                                                                                                                                                                                                                                                                                                                                                                                                                                                                                                                                                                                                                                                                                                                                                                                                                                                                                                                                                                                                                                                                                                                                                                                                                                                                                                                                                                                                                                                                                                                                                                                                                                                                                                                                                                                                                                                                                                                                                                                                                                                                                                                                                                                                                                                                                                                                                                                                                                                                                                                                                                                                                                                                                                                                                                                                                                                                           | -2.70327 | -0.33180 |         |          |   |          |         |          |   |          |          |          |   |          |         |          |   |          |         |          |   |          |          |          |   |          |          |          |   |          |         |          |   |          |         |         |   |          |         |         |   |         |         |         |   |          |         |         |   |          |         |         |   |         |         |         |   |          |         |         |   |          |         |         |   |         |         |         |   |          |         |          |   |          |         |          |   |          |         |         |   |         |         |          |   |         |          |          |   |         |          |          |   |         |          |          |   |         |          |         |   |         |         |         |   |         |         |         |   |          |         |         |   |          |         |         |   |          |         |          |   |          |         |          |                                                                                                                                                                                                                       |                                                                                                                                                                                                                                                                                                                                                                                                                                                                                                                                                                                                                                                                                                                                                                                                                                                                                                                                                                                                                                                                                                                                                                                                                                                                                                                                                                                                                                                                                                                                                                                                                                                                                                                                                                                                                                                                                                                                                                                                                                                                                                                                                                                                                                                                                |         |          |          |          |         |          |          |          |          |          |          |          |          |         |          |          |          |          |         |          |          |         |          |          |          |         |          |          |          |          |         |          |          |          |         |         |          |          |         |          |          |          |                                                                                                                                                                                                                        |                                                                                                                                                                                                                                                                                                                                                                                                                                                                                                                                                                                                                                                                                                                                                                                                                                                                                                                                                                                                                                                                                                                                                                                                                                                                                                                                                                                                                                                                                                                                                                                                                                                                                                                                                                                                                                                                                                                                                                                                                                                                                                                                                                                                                                                                                                                                                                                                                                                                                                                                                                                                                                                                                                                                                                                                                                                                                                                                                                                                                                                                                      |   |          |          |          |   |          |         |          |   |          |          |          |   |          |         |          |   |          |         |          |   |          |          |          |   |          |          |          |   |         |         |          |   |          |         |          |   |          |         |          |   |          |         |          |   |          |          |         |   |          |          |         |   |         |          |         |   |          |          |         |   |         |          |         |   |         |          |          |   |          |          |          |   |          |          |          |   |          |         |          |   |         |          |          |   |         |          |          |   |         |          |          |   |         |          |          |   |         |          |          |   |         |          |          |   |         |          |          |   |         |          |          |   |         |         |          |   |         |         |          |   |         |         |          |   |         |         |          |   |         |         |          |   |          |          |         |   |          |         |         |   |          |         |         |   |          |         |         |   |          |         |         |   |          |          |         |   |          |          |         |   |          |          |         |   |          |          |         |
| H                                                                                                                                                                                                                     | -1.87662                                                                                                                                                                                                                                                                                                                                                                                                                                                                                                                                                                                                                                                                                                                                                                                                                                                                                                                                                                                                                                                                                                                                                                                                                                                                                                                                                                                                                                                                                                                                                                                                                                                                                                                                                                                                                                                                                                                                                                                                                                                                                                                                                                                                                                                                                                                                                                                                                                                                                                                                                                                                                                                                                                                                                                                                                                                                                                                                                                                                                                                                           | -1.59977 | 0.89030  |         |          |   |          |         |          |   |          |          |          |   |          |         |          |   |          |         |          |   |          |          |          |   |          |          |          |   |          |         |          |   |          |         |         |   |          |         |         |   |         |         |         |   |          |         |         |   |          |         |         |   |         |         |         |   |          |         |         |   |          |         |         |   |         |         |         |   |          |         |          |   |          |         |          |   |          |         |         |   |         |         |          |   |         |          |          |   |         |          |          |   |         |          |          |   |         |          |         |   |         |         |         |   |         |         |         |   |          |         |         |   |          |         |         |   |          |         |          |   |          |         |          |                                                                                                                                                                                                                       |                                                                                                                                                                                                                                                                                                                                                                                                                                                                                                                                                                                                                                                                                                                                                                                                                                                                                                                                                                                                                                                                                                                                                                                                                                                                                                                                                                                                                                                                                                                                                                                                                                                                                                                                                                                                                                                                                                                                                                                                                                                                                                                                                                                                                                                                                |         |          |          |          |         |          |          |          |          |          |          |          |          |         |          |          |          |          |         |          |          |         |          |          |          |         |          |          |          |          |         |          |          |          |         |         |          |          |         |          |          |          |                                                                                                                                                                                                                        |                                                                                                                                                                                                                                                                                                                                                                                                                                                                                                                                                                                                                                                                                                                                                                                                                                                                                                                                                                                                                                                                                                                                                                                                                                                                                                                                                                                                                                                                                                                                                                                                                                                                                                                                                                                                                                                                                                                                                                                                                                                                                                                                                                                                                                                                                                                                                                                                                                                                                                                                                                                                                                                                                                                                                                                                                                                                                                                                                                                                                                                                                      |   |          |          |          |   |          |         |          |   |          |          |          |   |          |         |          |   |          |         |          |   |          |          |          |   |          |          |          |   |         |         |          |   |          |         |          |   |          |         |          |   |          |         |          |   |          |          |         |   |          |          |         |   |         |          |         |   |          |          |         |   |         |          |         |   |         |          |          |   |          |          |          |   |          |          |          |   |          |         |          |   |         |          |          |   |         |          |          |   |         |          |          |   |         |          |          |   |         |          |          |   |         |          |          |   |         |          |          |   |         |          |          |   |         |         |          |   |         |         |          |   |         |         |          |   |         |         |          |   |         |         |          |   |          |          |         |   |          |         |         |   |          |         |         |   |          |         |         |   |          |         |         |   |          |          |         |   |          |          |         |   |          |          |         |   |          |          |         |
| H                                                                                                                                                                                                                     | -1.13602                                                                                                                                                                                                                                                                                                                                                                                                                                                                                                                                                                                                                                                                                                                                                                                                                                                                                                                                                                                                                                                                                                                                                                                                                                                                                                                                                                                                                                                                                                                                                                                                                                                                                                                                                                                                                                                                                                                                                                                                                                                                                                                                                                                                                                                                                                                                                                                                                                                                                                                                                                                                                                                                                                                                                                                                                                                                                                                                                                                                                                                                           | -3.18457 | 0.64638  |         |          |   |          |         |          |   |          |          |          |   |          |         |          |   |          |         |          |   |          |          |          |   |          |          |          |   |          |         |          |   |          |         |         |   |          |         |         |   |         |         |         |   |          |         |         |   |          |         |         |   |         |         |         |   |          |         |         |   |          |         |         |   |         |         |         |   |          |         |          |   |          |         |          |   |          |         |         |   |         |         |          |   |         |          |          |   |         |          |          |   |         |          |          |   |         |          |         |   |         |         |         |   |         |         |         |   |          |         |         |   |          |         |         |   |          |         |          |   |          |         |          |                                                                                                                                                                                                                       |                                                                                                                                                                                                                                                                                                                                                                                                                                                                                                                                                                                                                                                                                                                                                                                                                                                                                                                                                                                                                                                                                                                                                                                                                                                                                                                                                                                                                                                                                                                                                                                                                                                                                                                                                                                                                                                                                                                                                                                                                                                                                                                                                                                                                                                                                |         |          |          |          |         |          |          |          |          |          |          |          |          |         |          |          |          |          |         |          |          |         |          |          |          |         |          |          |          |          |         |          |          |          |         |         |          |          |         |          |          |          |                                                                                                                                                                                                                        |                                                                                                                                                                                                                                                                                                                                                                                                                                                                                                                                                                                                                                                                                                                                                                                                                                                                                                                                                                                                                                                                                                                                                                                                                                                                                                                                                                                                                                                                                                                                                                                                                                                                                                                                                                                                                                                                                                                                                                                                                                                                                                                                                                                                                                                                                                                                                                                                                                                                                                                                                                                                                                                                                                                                                                                                                                                                                                                                                                                                                                                                                      |   |          |          |          |   |          |         |          |   |          |          |          |   |          |         |          |   |          |         |          |   |          |          |          |   |          |          |          |   |         |         |          |   |          |         |          |   |          |         |          |   |          |         |          |   |          |          |         |   |          |          |         |   |         |          |         |   |          |          |         |   |         |          |         |   |         |          |          |   |          |          |          |   |          |          |          |   |          |         |          |   |         |          |          |   |         |          |          |   |         |          |          |   |         |          |          |   |         |          |          |   |         |          |          |   |         |          |          |   |         |          |          |   |         |         |          |   |         |         |          |   |         |         |          |   |         |         |          |   |         |         |          |   |          |          |         |   |          |         |         |   |          |         |         |   |          |         |         |   |          |         |         |   |          |          |         |   |          |          |         |   |          |          |         |   |          |          |         |
| C                                                                                                                                                                                                                     | -0.28390                                                                                                                                                                                                                                                                                                                                                                                                                                                                                                                                                                                                                                                                                                                                                                                                                                                                                                                                                                                                                                                                                                                                                                                                                                                                                                                                                                                                                                                                                                                                                                                                                                                                                                                                                                                                                                                                                                                                                                                                                                                                                                                                                                                                                                                                                                                                                                                                                                                                                                                                                                                                                                                                                                                                                                                                                                                                                                                                                                                                                                                                           | -2.82545 | -1.79720 |         |          |   |          |         |          |   |          |          |          |   |          |         |          |   |          |         |          |   |          |          |          |   |          |          |          |   |          |         |          |   |          |         |         |   |          |         |         |   |         |         |         |   |          |         |         |   |          |         |         |   |         |         |         |   |          |         |         |   |          |         |         |   |         |         |         |   |          |         |          |   |          |         |          |   |          |         |         |   |         |         |          |   |         |          |          |   |         |          |          |   |         |          |          |   |         |          |         |   |         |         |         |   |         |         |         |   |          |         |         |   |          |         |         |   |          |         |          |   |          |         |          |                                                                                                                                                                                                                       |                                                                                                                                                                                                                                                                                                                                                                                                                                                                                                                                                                                                                                                                                                                                                                                                                                                                                                                                                                                                                                                                                                                                                                                                                                                                                                                                                                                                                                                                                                                                                                                                                                                                                                                                                                                                                                                                                                                                                                                                                                                                                                                                                                                                                                                                                |         |          |          |          |         |          |          |          |          |          |          |          |          |         |          |          |          |          |         |          |          |         |          |          |          |         |          |          |          |          |         |          |          |          |         |         |          |          |         |          |          |          |                                                                                                                                                                                                                        |                                                                                                                                                                                                                                                                                                                                                                                                                                                                                                                                                                                                                                                                                                                                                                                                                                                                                                                                                                                                                                                                                                                                                                                                                                                                                                                                                                                                                                                                                                                                                                                                                                                                                                                                                                                                                                                                                                                                                                                                                                                                                                                                                                                                                                                                                                                                                                                                                                                                                                                                                                                                                                                                                                                                                                                                                                                                                                                                                                                                                                                                                      |   |          |          |          |   |          |         |          |   |          |          |          |   |          |         |          |   |          |         |          |   |          |          |          |   |          |          |          |   |         |         |          |   |          |         |          |   |          |         |          |   |          |         |          |   |          |          |         |   |          |          |         |   |         |          |         |   |          |          |         |   |         |          |         |   |         |          |          |   |          |          |          |   |          |          |          |   |          |         |          |   |         |          |          |   |         |          |          |   |         |          |          |   |         |          |          |   |         |          |          |   |         |          |          |   |         |          |          |   |         |          |          |   |         |         |          |   |         |         |          |   |         |         |          |   |         |         |          |   |         |         |          |   |          |          |         |   |          |         |         |   |          |         |         |   |          |         |         |   |          |         |         |   |          |          |         |   |          |          |         |   |          |          |         |   |          |          |         |
| H                                                                                                                                                                                                                     | 0.16179                                                                                                                                                                                                                                                                                                                                                                                                                                                                                                                                                                                                                                                                                                                                                                                                                                                                                                                                                                                                                                                                                                                                                                                                                                                                                                                                                                                                                                                                                                                                                                                                                                                                                                                                                                                                                                                                                                                                                                                                                                                                                                                                                                                                                                                                                                                                                                                                                                                                                                                                                                                                                                                                                                                                                                                                                                                                                                                                                                                                                                                                            | -3.64876 | -1.23744 |         |          |   |          |         |          |   |          |          |          |   |          |         |          |   |          |         |          |   |          |          |          |   |          |          |          |   |          |         |          |   |          |         |         |   |          |         |         |   |         |         |         |   |          |         |         |   |          |         |         |   |         |         |         |   |          |         |         |   |          |         |         |   |         |         |         |   |          |         |          |   |          |         |          |   |          |         |         |   |         |         |          |   |         |          |          |   |         |          |          |   |         |          |          |   |         |          |         |   |         |         |         |   |         |         |         |   |          |         |         |   |          |         |         |   |          |         |          |   |          |         |          |                                                                                                                                                                                                                       |                                                                                                                                                                                                                                                                                                                                                                                                                                                                                                                                                                                                                                                                                                                                                                                                                                                                                                                                                                                                                                                                                                                                                                                                                                                                                                                                                                                                                                                                                                                                                                                                                                                                                                                                                                                                                                                                                                                                                                                                                                                                                                                                                                                                                                                                                |         |          |          |          |         |          |          |          |          |          |          |          |          |         |          |          |          |          |         |          |          |         |          |          |          |         |          |          |          |          |         |          |          |          |         |         |          |          |         |          |          |          |                                                                                                                                                                                                                        |                                                                                                                                                                                                                                                                                                                                                                                                                                                                                                                                                                                                                                                                                                                                                                                                                                                                                                                                                                                                                                                                                                                                                                                                                                                                                                                                                                                                                                                                                                                                                                                                                                                                                                                                                                                                                                                                                                                                                                                                                                                                                                                                                                                                                                                                                                                                                                                                                                                                                                                                                                                                                                                                                                                                                                                                                                                                                                                                                                                                                                                                                      |   |          |          |          |   |          |         |          |   |          |          |          |   |          |         |          |   |          |         |          |   |          |          |          |   |          |          |          |   |         |         |          |   |          |         |          |   |          |         |          |   |          |         |          |   |          |          |         |   |          |          |         |   |         |          |         |   |          |          |         |   |         |          |         |   |         |          |          |   |          |          |          |   |          |          |          |   |          |         |          |   |         |          |          |   |         |          |          |   |         |          |          |   |         |          |          |   |         |          |          |   |         |          |          |   |         |          |          |   |         |          |          |   |         |         |          |   |         |         |          |   |         |         |          |   |         |         |          |   |         |         |          |   |          |          |         |   |          |         |         |   |          |         |         |   |          |         |         |   |          |         |         |   |          |          |         |   |          |          |         |   |          |          |         |   |          |          |         |
| H                                                                                                                                                                                                                     | 0.45500                                                                                                                                                                                                                                                                                                                                                                                                                                                                                                                                                                                                                                                                                                                                                                                                                                                                                                                                                                                                                                                                                                                                                                                                                                                                                                                                                                                                                                                                                                                                                                                                                                                                                                                                                                                                                                                                                                                                                                                                                                                                                                                                                                                                                                                                                                                                                                                                                                                                                                                                                                                                                                                                                                                                                                                                                                                                                                                                                                                                                                                                            | -2.42923 | -2.49404 |         |          |   |          |         |          |   |          |          |          |   |          |         |          |   |          |         |          |   |          |          |          |   |          |          |          |   |          |         |          |   |          |         |         |   |          |         |         |   |         |         |         |   |          |         |         |   |          |         |         |   |         |         |         |   |          |         |         |   |          |         |         |   |         |         |         |   |          |         |          |   |          |         |          |   |          |         |         |   |         |         |          |   |         |          |          |   |         |          |          |   |         |          |          |   |         |          |         |   |         |         |         |   |         |         |         |   |          |         |         |   |          |         |         |   |          |         |          |   |          |         |          |                                                                                                                                                                                                                       |                                                                                                                                                                                                                                                                                                                                                                                                                                                                                                                                                                                                                                                                                                                                                                                                                                                                                                                                                                                                                                                                                                                                                                                                                                                                                                                                                                                                                                                                                                                                                                                                                                                                                                                                                                                                                                                                                                                                                                                                                                                                                                                                                                                                                                                                                |         |          |          |          |         |          |          |          |          |          |          |          |          |         |          |          |          |          |         |          |          |         |          |          |          |         |          |          |          |          |         |          |          |          |         |         |          |          |         |          |          |          |                                                                                                                                                                                                                        |                                                                                                                                                                                                                                                                                                                                                                                                                                                                                                                                                                                                                                                                                                                                                                                                                                                                                                                                                                                                                                                                                                                                                                                                                                                                                                                                                                                                                                                                                                                                                                                                                                                                                                                                                                                                                                                                                                                                                                                                                                                                                                                                                                                                                                                                                                                                                                                                                                                                                                                                                                                                                                                                                                                                                                                                                                                                                                                                                                                                                                                                                      |   |          |          |          |   |          |         |          |   |          |          |          |   |          |         |          |   |          |         |          |   |          |          |          |   |          |          |          |   |         |         |          |   |          |         |          |   |          |         |          |   |          |         |          |   |          |          |         |   |          |          |         |   |         |          |         |   |          |          |         |   |         |          |         |   |         |          |          |   |          |          |          |   |          |          |          |   |          |         |          |   |         |          |          |   |         |          |          |   |         |          |          |   |         |          |          |   |         |          |          |   |         |          |          |   |         |          |          |   |         |          |          |   |         |         |          |   |         |         |          |   |         |         |          |   |         |         |          |   |         |         |          |   |          |          |         |   |          |         |         |   |          |         |         |   |          |         |         |   |          |         |         |   |          |          |         |   |          |          |         |   |          |          |         |   |          |          |         |
| H                                                                                                                                                                                                                     | -1.12702                                                                                                                                                                                                                                                                                                                                                                                                                                                                                                                                                                                                                                                                                                                                                                                                                                                                                                                                                                                                                                                                                                                                                                                                                                                                                                                                                                                                                                                                                                                                                                                                                                                                                                                                                                                                                                                                                                                                                                                                                                                                                                                                                                                                                                                                                                                                                                                                                                                                                                                                                                                                                                                                                                                                                                                                                                                                                                                                                                                                                                                                           | -3.22748 | -2.37450 |         |          |   |          |         |          |   |          |          |          |   |          |         |          |   |          |         |          |   |          |          |          |   |          |          |          |   |          |         |          |   |          |         |         |   |          |         |         |   |         |         |         |   |          |         |         |   |          |         |         |   |         |         |         |   |          |         |         |   |          |         |         |   |         |         |         |   |          |         |          |   |          |         |          |   |          |         |         |   |         |         |          |   |         |          |          |   |         |          |          |   |         |          |          |   |         |          |         |   |         |         |         |   |         |         |         |   |          |         |         |   |          |         |         |   |          |         |          |   |          |         |          |                                                                                                                                                                                                                       |                                                                                                                                                                                                                                                                                                                                                                                                                                                                                                                                                                                                                                                                                                                                                                                                                                                                                                                                                                                                                                                                                                                                                                                                                                                                                                                                                                                                                                                                                                                                                                                                                                                                                                                                                                                                                                                                                                                                                                                                                                                                                                                                                                                                                                                                                |         |          |          |          |         |          |          |          |          |          |          |          |          |         |          |          |          |          |         |          |          |         |          |          |          |         |          |          |          |          |         |          |          |          |         |         |          |          |         |          |          |          |                                                                                                                                                                                                                        |                                                                                                                                                                                                                                                                                                                                                                                                                                                                                                                                                                                                                                                                                                                                                                                                                                                                                                                                                                                                                                                                                                                                                                                                                                                                                                                                                                                                                                                                                                                                                                                                                                                                                                                                                                                                                                                                                                                                                                                                                                                                                                                                                                                                                                                                                                                                                                                                                                                                                                                                                                                                                                                                                                                                                                                                                                                                                                                                                                                                                                                                                      |   |          |          |          |   |          |         |          |   |          |          |          |   |          |         |          |   |          |         |          |   |          |          |          |   |          |          |          |   |         |         |          |   |          |         |          |   |          |         |          |   |          |         |          |   |          |          |         |   |          |          |         |   |         |          |         |   |          |          |         |   |         |          |         |   |         |          |          |   |          |          |          |   |          |          |          |   |          |         |          |   |         |          |          |   |         |          |          |   |         |          |          |   |         |          |          |   |         |          |          |   |         |          |          |   |         |          |          |   |         |          |          |   |         |         |          |   |         |         |          |   |         |         |          |   |         |         |          |   |         |         |          |   |          |          |         |   |          |         |         |   |          |         |         |   |          |         |         |   |          |         |         |   |          |          |         |   |          |          |         |   |          |          |         |   |          |          |         |
| C                                                                                                                                                                                                                     | -2.63282                                                                                                                                                                                                                                                                                                                                                                                                                                                                                                                                                                                                                                                                                                                                                                                                                                                                                                                                                                                                                                                                                                                                                                                                                                                                                                                                                                                                                                                                                                                                                                                                                                                                                                                                                                                                                                                                                                                                                                                                                                                                                                                                                                                                                                                                                                                                                                                                                                                                                                                                                                                                                                                                                                                                                                                                                                                                                                                                                                                                                                                                           | -0.12744 | -2.59600 |         |          |   |          |         |          |   |          |          |          |   |          |         |          |   |          |         |          |   |          |          |          |   |          |          |          |   |          |         |          |   |          |         |         |   |          |         |         |   |         |         |         |   |          |         |         |   |          |         |         |   |         |         |         |   |          |         |         |   |          |         |         |   |         |         |         |   |          |         |          |   |          |         |          |   |          |         |         |   |         |         |          |   |         |          |          |   |         |          |          |   |         |          |          |   |         |          |         |   |         |         |         |   |         |         |         |   |          |         |         |   |          |         |         |   |          |         |          |   |          |         |          |                                                                                                                                                                                                                       |                                                                                                                                                                                                                                                                                                                                                                                                                                                                                                                                                                                                                                                                                                                                                                                                                                                                                                                                                                                                                                                                                                                                                                                                                                                                                                                                                                                                                                                                                                                                                                                                                                                                                                                                                                                                                                                                                                                                                                                                                                                                                                                                                                                                                                                                                |         |          |          |          |         |          |          |          |          |          |          |          |          |         |          |          |          |          |         |          |          |         |          |          |          |         |          |          |          |          |         |          |          |          |         |         |          |          |         |          |          |          |                                                                                                                                                                                                                        |                                                                                                                                                                                                                                                                                                                                                                                                                                                                                                                                                                                                                                                                                                                                                                                                                                                                                                                                                                                                                                                                                                                                                                                                                                                                                                                                                                                                                                                                                                                                                                                                                                                                                                                                                                                                                                                                                                                                                                                                                                                                                                                                                                                                                                                                                                                                                                                                                                                                                                                                                                                                                                                                                                                                                                                                                                                                                                                                                                                                                                                                                      |   |          |          |          |   |          |         |          |   |          |          |          |   |          |         |          |   |          |         |          |   |          |          |          |   |          |          |          |   |         |         |          |   |          |         |          |   |          |         |          |   |          |         |          |   |          |          |         |   |          |          |         |   |         |          |         |   |          |          |         |   |         |          |         |   |         |          |          |   |          |          |          |   |          |          |          |   |          |         |          |   |         |          |          |   |         |          |          |   |         |          |          |   |         |          |          |   |         |          |          |   |         |          |          |   |         |          |          |   |         |          |          |   |         |         |          |   |         |         |          |   |         |         |          |   |         |         |          |   |         |         |          |   |          |          |         |   |          |         |         |   |          |         |         |   |          |         |         |   |          |         |         |   |          |          |         |   |          |          |         |   |          |          |         |   |          |          |         |
| C                                                                                                                                                                                                                     | -0.69935                                                                                                                                                                                                                                                                                                                                                                                                                                                                                                                                                                                                                                                                                                                                                                                                                                                                                                                                                                                                                                                                                                                                                                                                                                                                                                                                                                                                                                                                                                                                                                                                                                                                                                                                                                                                                                                                                                                                                                                                                                                                                                                                                                                                                                                                                                                                                                                                                                                                                                                                                                                                                                                                                                                                                                                                                                                                                                                                                                                                                                                                           | 0.11749  | -0.47358 |         |          |   |          |         |          |   |          |          |          |   |          |         |          |   |          |         |          |   |          |          |          |   |          |          |          |   |          |         |          |   |          |         |         |   |          |         |         |   |         |         |         |   |          |         |         |   |          |         |         |   |         |         |         |   |          |         |         |   |          |         |         |   |         |         |         |   |          |         |          |   |          |         |          |   |          |         |         |   |         |         |          |   |         |          |          |   |         |          |          |   |         |          |          |   |         |          |         |   |         |         |         |   |         |         |         |   |          |         |         |   |          |         |         |   |          |         |          |   |          |         |          |                                                                                                                                                                                                                       |                                                                                                                                                                                                                                                                                                                                                                                                                                                                                                                                                                                                                                                                                                                                                                                                                                                                                                                                                                                                                                                                                                                                                                                                                                                                                                                                                                                                                                                                                                                                                                                                                                                                                                                                                                                                                                                                                                                                                                                                                                                                                                                                                                                                                                                                                |         |          |          |          |         |          |          |          |          |          |          |          |          |         |          |          |          |          |         |          |          |         |          |          |          |         |          |          |          |          |         |          |          |          |         |         |          |          |         |          |          |          |                                                                                                                                                                                                                        |                                                                                                                                                                                                                                                                                                                                                                                                                                                                                                                                                                                                                                                                                                                                                                                                                                                                                                                                                                                                                                                                                                                                                                                                                                                                                                                                                                                                                                                                                                                                                                                                                                                                                                                                                                                                                                                                                                                                                                                                                                                                                                                                                                                                                                                                                                                                                                                                                                                                                                                                                                                                                                                                                                                                                                                                                                                                                                                                                                                                                                                                                      |   |          |          |          |   |          |         |          |   |          |          |          |   |          |         |          |   |          |         |          |   |          |          |          |   |          |          |          |   |         |         |          |   |          |         |          |   |          |         |          |   |          |         |          |   |          |          |         |   |          |          |         |   |         |          |         |   |          |          |         |   |         |          |         |   |         |          |          |   |          |          |          |   |          |          |          |   |          |         |          |   |         |          |          |   |         |          |          |   |         |          |          |   |         |          |          |   |         |          |          |   |         |          |          |   |         |          |          |   |         |          |          |   |         |         |          |   |         |         |          |   |         |         |          |   |         |         |          |   |         |         |          |   |          |          |         |   |          |         |         |   |          |         |         |   |          |         |         |   |          |         |         |   |          |          |         |   |          |          |         |   |          |          |         |   |          |          |         |
| C                                                                                                                                                                                                                     | -2.99277                                                                                                                                                                                                                                                                                                                                                                                                                                                                                                                                                                                                                                                                                                                                                                                                                                                                                                                                                                                                                                                                                                                                                                                                                                                                                                                                                                                                                                                                                                                                                                                                                                                                                                                                                                                                                                                                                                                                                                                                                                                                                                                                                                                                                                                                                                                                                                                                                                                                                                                                                                                                                                                                                                                                                                                                                                                                                                                                                                                                                                                                           | -0.28997 | -1.27141 |         |          |   |          |         |          |   |          |          |          |   |          |         |          |   |          |         |          |   |          |          |          |   |          |          |          |   |          |         |          |   |          |         |         |   |          |         |         |   |         |         |         |   |          |         |         |   |          |         |         |   |         |         |         |   |          |         |         |   |          |         |         |   |         |         |         |   |          |         |          |   |          |         |          |   |          |         |         |   |         |         |          |   |         |          |          |   |         |          |          |   |         |          |          |   |         |          |         |   |         |         |         |   |         |         |         |   |          |         |         |   |          |         |         |   |          |         |          |   |          |         |          |                                                                                                                                                                                                                       |                                                                                                                                                                                                                                                                                                                                                                                                                                                                                                                                                                                                                                                                                                                                                                                                                                                                                                                                                                                                                                                                                                                                                                                                                                                                                                                                                                                                                                                                                                                                                                                                                                                                                                                                                                                                                                                                                                                                                                                                                                                                                                                                                                                                                                                                                |         |          |          |          |         |          |          |          |          |          |          |          |          |         |          |          |          |          |         |          |          |         |          |          |          |         |          |          |          |          |         |          |          |          |         |         |          |          |         |          |          |          |                                                                                                                                                                                                                        |                                                                                                                                                                                                                                                                                                                                                                                                                                                                                                                                                                                                                                                                                                                                                                                                                                                                                                                                                                                                                                                                                                                                                                                                                                                                                                                                                                                                                                                                                                                                                                                                                                                                                                                                                                                                                                                                                                                                                                                                                                                                                                                                                                                                                                                                                                                                                                                                                                                                                                                                                                                                                                                                                                                                                                                                                                                                                                                                                                                                                                                                                      |   |          |          |          |   |          |         |          |   |          |          |          |   |          |         |          |   |          |         |          |   |          |          |          |   |          |          |          |   |         |         |          |   |          |         |          |   |          |         |          |   |          |         |          |   |          |          |         |   |          |          |         |   |         |          |         |   |          |          |         |   |         |          |         |   |         |          |          |   |          |          |          |   |          |          |          |   |          |         |          |   |         |          |          |   |         |          |          |   |         |          |          |   |         |          |          |   |         |          |          |   |         |          |          |   |         |          |          |   |         |          |          |   |         |         |          |   |         |         |          |   |         |         |          |   |         |         |          |   |         |         |          |   |          |          |         |   |          |         |         |   |          |         |         |   |          |         |         |   |          |         |         |   |          |          |         |   |          |          |         |   |          |          |         |   |          |          |         |
| C                                                                                                                                                                                                                     | -1.33491                                                                                                                                                                                                                                                                                                                                                                                                                                                                                                                                                                                                                                                                                                                                                                                                                                                                                                                                                                                                                                                                                                                                                                                                                                                                                                                                                                                                                                                                                                                                                                                                                                                                                                                                                                                                                                                                                                                                                                                                                                                                                                                                                                                                                                                                                                                                                                                                                                                                                                                                                                                                                                                                                                                                                                                                                                                                                                                                                                                                                                                                           | 0.26285  | -2.87186 |         |          |   |          |         |          |   |          |          |          |   |          |         |          |   |          |         |          |   |          |          |          |   |          |          |          |   |          |         |          |   |          |         |         |   |          |         |         |   |         |         |         |   |          |         |         |   |          |         |         |   |         |         |         |   |          |         |         |   |          |         |         |   |         |         |         |   |          |         |          |   |          |         |          |   |          |         |         |   |         |         |          |   |         |          |          |   |         |          |          |   |         |          |          |   |         |          |         |   |         |         |         |   |         |         |         |   |          |         |         |   |          |         |         |   |          |         |          |   |          |         |          |                                                                                                                                                                                                                       |                                                                                                                                                                                                                                                                                                                                                                                                                                                                                                                                                                                                                                                                                                                                                                                                                                                                                                                                                                                                                                                                                                                                                                                                                                                                                                                                                                                                                                                                                                                                                                                                                                                                                                                                                                                                                                                                                                                                                                                                                                                                                                                                                                                                                                                                                |         |          |          |          |         |          |          |          |          |          |          |          |          |         |          |          |          |          |         |          |          |         |          |          |          |         |          |          |          |          |         |          |          |          |         |         |          |          |         |          |          |          |                                                                                                                                                                                                                        |                                                                                                                                                                                                                                                                                                                                                                                                                                                                                                                                                                                                                                                                                                                                                                                                                                                                                                                                                                                                                                                                                                                                                                                                                                                                                                                                                                                                                                                                                                                                                                                                                                                                                                                                                                                                                                                                                                                                                                                                                                                                                                                                                                                                                                                                                                                                                                                                                                                                                                                                                                                                                                                                                                                                                                                                                                                                                                                                                                                                                                                                                      |   |          |          |          |   |          |         |          |   |          |          |          |   |          |         |          |   |          |         |          |   |          |          |          |   |          |          |          |   |         |         |          |   |          |         |          |   |          |         |          |   |          |         |          |   |          |          |         |   |          |          |         |   |         |          |         |   |          |          |         |   |         |          |         |   |         |          |          |   |          |          |          |   |          |          |          |   |          |         |          |   |         |          |          |   |         |          |          |   |         |          |          |   |         |          |          |   |         |          |          |   |         |          |          |   |         |          |          |   |         |          |          |   |         |         |          |   |         |         |          |   |         |         |          |   |         |         |          |   |         |         |          |   |          |          |         |   |          |         |         |   |          |         |         |   |          |         |         |   |          |         |         |   |          |          |         |   |          |          |         |   |          |          |         |   |          |          |         |
| C                                                                                                                                                                                                                     | -0.42544                                                                                                                                                                                                                                                                                                                                                                                                                                                                                                                                                                                                                                                                                                                                                                                                                                                                                                                                                                                                                                                                                                                                                                                                                                                                                                                                                                                                                                                                                                                                                                                                                                                                                                                                                                                                                                                                                                                                                                                                                                                                                                                                                                                                                                                                                                                                                                                                                                                                                                                                                                                                                                                                                                                                                                                                                                                                                                                                                                                                                                                                           | 0.37100  | -1.83334 |         |          |   |          |         |          |   |          |          |          |   |          |         |          |   |          |         |          |   |          |          |          |   |          |          |          |   |          |         |          |   |          |         |         |   |          |         |         |   |         |         |         |   |          |         |         |   |          |         |         |   |         |         |         |   |          |         |         |   |          |         |         |   |         |         |         |   |          |         |          |   |          |         |          |   |          |         |         |   |         |         |          |   |         |          |          |   |         |          |          |   |         |          |          |   |         |          |         |   |         |         |         |   |         |         |         |   |          |         |         |   |          |         |         |   |          |         |          |   |          |         |          |                                                                                                                                                                                                                       |                                                                                                                                                                                                                                                                                                                                                                                                                                                                                                                                                                                                                                                                                                                                                                                                                                                                                                                                                                                                                                                                                                                                                                                                                                                                                                                                                                                                                                                                                                                                                                                                                                                                                                                                                                                                                                                                                                                                                                                                                                                                                                                                                                                                                                                                                |         |          |          |          |         |          |          |          |          |          |          |          |          |         |          |          |          |          |         |          |          |         |          |          |          |         |          |          |          |          |         |          |          |          |         |         |          |          |         |          |          |          |                                                                                                                                                                                                                        |                                                                                                                                                                                                                                                                                                                                                                                                                                                                                                                                                                                                                                                                                                                                                                                                                                                                                                                                                                                                                                                                                                                                                                                                                                                                                                                                                                                                                                                                                                                                                                                                                                                                                                                                                                                                                                                                                                                                                                                                                                                                                                                                                                                                                                                                                                                                                                                                                                                                                                                                                                                                                                                                                                                                                                                                                                                                                                                                                                                                                                                                                      |   |          |          |          |   |          |         |          |   |          |          |          |   |          |         |          |   |          |         |          |   |          |          |          |   |          |          |          |   |         |         |          |   |          |         |          |   |          |         |          |   |          |         |          |   |          |          |         |   |          |          |         |   |         |          |         |   |          |          |         |   |         |          |         |   |         |          |          |   |          |          |          |   |          |          |          |   |          |         |          |   |         |          |          |   |         |          |          |   |         |          |          |   |         |          |          |   |         |          |          |   |         |          |          |   |         |          |          |   |         |          |          |   |         |         |          |   |         |         |          |   |         |         |          |   |         |         |          |   |         |         |          |   |          |          |         |   |          |         |         |   |          |         |         |   |          |         |         |   |          |         |         |   |          |          |         |   |          |          |         |   |          |          |         |   |          |          |         |
| C                                                                                                                                                                                                                     | -2.10261                                                                                                                                                                                                                                                                                                                                                                                                                                                                                                                                                                                                                                                                                                                                                                                                                                                                                                                                                                                                                                                                                                                                                                                                                                                                                                                                                                                                                                                                                                                                                                                                                                                                                                                                                                                                                                                                                                                                                                                                                                                                                                                                                                                                                                                                                                                                                                                                                                                                                                                                                                                                                                                                                                                                                                                                                                                                                                                                                                                                                                                                           | -0.11506 | -0.20426 |         |          |   |          |         |          |   |          |          |          |   |          |         |          |   |          |         |          |   |          |          |          |   |          |          |          |   |          |         |          |   |          |         |         |   |          |         |         |   |         |         |         |   |          |         |         |   |          |         |         |   |         |         |         |   |          |         |         |   |          |         |         |   |         |         |         |   |          |         |          |   |          |         |          |   |          |         |         |   |         |         |          |   |         |          |          |   |         |          |          |   |         |          |          |   |         |          |         |   |         |         |         |   |         |         |         |   |          |         |         |   |          |         |         |   |          |         |          |   |          |         |          |                                                                                                                                                                                                                       |                                                                                                                                                                                                                                                                                                                                                                                                                                                                                                                                                                                                                                                                                                                                                                                                                                                                                                                                                                                                                                                                                                                                                                                                                                                                                                                                                                                                                                                                                                                                                                                                                                                                                                                                                                                                                                                                                                                                                                                                                                                                                                                                                                                                                                                                                |         |          |          |          |         |          |          |          |          |          |          |          |          |         |          |          |          |          |         |          |          |         |          |          |          |         |          |          |          |          |         |          |          |          |         |         |          |          |         |          |          |          |                                                                                                                                                                                                                        |                                                                                                                                                                                                                                                                                                                                                                                                                                                                                                                                                                                                                                                                                                                                                                                                                                                                                                                                                                                                                                                                                                                                                                                                                                                                                                                                                                                                                                                                                                                                                                                                                                                                                                                                                                                                                                                                                                                                                                                                                                                                                                                                                                                                                                                                                                                                                                                                                                                                                                                                                                                                                                                                                                                                                                                                                                                                                                                                                                                                                                                                                      |   |          |          |          |   |          |         |          |   |          |          |          |   |          |         |          |   |          |         |          |   |          |          |          |   |          |          |          |   |         |         |          |   |          |         |          |   |          |         |          |   |          |         |          |   |          |          |         |   |          |          |         |   |         |          |         |   |          |          |         |   |         |          |         |   |         |          |          |   |          |          |          |   |          |          |          |   |          |         |          |   |         |          |          |   |         |          |          |   |         |          |          |   |         |          |          |   |         |          |          |   |         |          |          |   |         |          |          |   |         |          |          |   |         |         |          |   |         |         |          |   |         |         |          |   |         |         |          |   |         |         |          |   |          |          |         |   |          |         |         |   |          |         |         |   |          |         |         |   |          |         |         |   |          |          |         |   |          |          |         |   |          |          |         |   |          |          |         |
| H                                                                                                                                                                                                                     | -4.02453                                                                                                                                                                                                                                                                                                                                                                                                                                                                                                                                                                                                                                                                                                                                                                                                                                                                                                                                                                                                                                                                                                                                                                                                                                                                                                                                                                                                                                                                                                                                                                                                                                                                                                                                                                                                                                                                                                                                                                                                                                                                                                                                                                                                                                                                                                                                                                                                                                                                                                                                                                                                                                                                                                                                                                                                                                                                                                                                                                                                                                                                           | -0.50786 | -1.04350 |         |          |   |          |         |          |   |          |          |          |   |          |         |          |   |          |         |          |   |          |          |          |   |          |          |          |   |          |         |          |   |          |         |         |   |          |         |         |   |         |         |         |   |          |         |         |   |          |         |         |   |         |         |         |   |          |         |         |   |          |         |         |   |         |         |         |   |          |         |          |   |          |         |          |   |          |         |         |   |         |         |          |   |         |          |          |   |         |          |          |   |         |          |          |   |         |          |         |   |         |         |         |   |         |         |         |   |          |         |         |   |          |         |         |   |          |         |          |   |          |         |          |                                                                                                                                                                                                                       |                                                                                                                                                                                                                                                                                                                                                                                                                                                                                                                                                                                                                                                                                                                                                                                                                                                                                                                                                                                                                                                                                                                                                                                                                                                                                                                                                                                                                                                                                                                                                                                                                                                                                                                                                                                                                                                                                                                                                                                                                                                                                                                                                                                                                                                                                |         |          |          |          |         |          |          |          |          |          |          |          |          |         |          |          |          |          |         |          |          |         |          |          |          |         |          |          |          |          |         |          |          |          |         |         |          |          |         |          |          |          |                                                                                                                                                                                                                        |                                                                                                                                                                                                                                                                                                                                                                                                                                                                                                                                                                                                                                                                                                                                                                                                                                                                                                                                                                                                                                                                                                                                                                                                                                                                                                                                                                                                                                                                                                                                                                                                                                                                                                                                                                                                                                                                                                                                                                                                                                                                                                                                                                                                                                                                                                                                                                                                                                                                                                                                                                                                                                                                                                                                                                                                                                                                                                                                                                                                                                                                                      |   |          |          |          |   |          |         |          |   |          |          |          |   |          |         |          |   |          |         |          |   |          |          |          |   |          |          |          |   |         |         |          |   |          |         |          |   |          |         |          |   |          |         |          |   |          |          |         |   |          |          |         |   |         |          |         |   |          |          |         |   |         |          |         |   |         |          |          |   |          |          |          |   |          |          |          |   |          |         |          |   |         |          |          |   |         |          |          |   |         |          |          |   |         |          |          |   |         |          |          |   |         |          |          |   |         |          |          |   |         |          |          |   |         |         |          |   |         |         |          |   |         |         |          |   |         |         |          |   |         |         |          |   |          |          |         |   |          |         |         |   |          |         |         |   |          |         |         |   |          |         |         |   |          |          |         |   |          |          |         |   |          |          |         |   |          |          |         |
| H                                                                                                                                                                                                                     | 0.55211                                                                                                                                                                                                                                                                                                                                                                                                                                                                                                                                                                                                                                                                                                                                                                                                                                                                                                                                                                                                                                                                                                                                                                                                                                                                                                                                                                                                                                                                                                                                                                                                                                                                                                                                                                                                                                                                                                                                                                                                                                                                                                                                                                                                                                                                                                                                                                                                                                                                                                                                                                                                                                                                                                                                                                                                                                                                                                                                                                                                                                                                            | 0.65458  | -2.14654 |         |          |   |          |         |          |   |          |          |          |   |          |         |          |   |          |         |          |   |          |          |          |   |          |          |          |   |          |         |          |   |          |         |         |   |          |         |         |   |         |         |         |   |          |         |         |   |          |         |         |   |         |         |         |   |          |         |         |   |          |         |         |   |         |         |         |   |          |         |          |   |          |         |          |   |          |         |         |   |         |         |          |   |         |          |          |   |         |          |          |   |         |          |          |   |         |          |         |   |         |         |         |   |         |         |         |   |          |         |         |   |          |         |         |   |          |         |          |   |          |         |          |                                                                                                                                                                                                                       |                                                                                                                                                                                                                                                                                                                                                                                                                                                                                                                                                                                                                                                                                                                                                                                                                                                                                                                                                                                                                                                                                                                                                                                                                                                                                                                                                                                                                                                                                                                                                                                                                                                                                                                                                                                                                                                                                                                                                                                                                                                                                                                                                                                                                                                                                |         |          |          |          |         |          |          |          |          |          |          |          |          |         |          |          |          |          |         |          |          |         |          |          |          |         |          |          |          |          |         |          |          |          |         |         |          |          |         |          |          |          |                                                                                                                                                                                                                        |                                                                                                                                                                                                                                                                                                                                                                                                                                                                                                                                                                                                                                                                                                                                                                                                                                                                                                                                                                                                                                                                                                                                                                                                                                                                                                                                                                                                                                                                                                                                                                                                                                                                                                                                                                                                                                                                                                                                                                                                                                                                                                                                                                                                                                                                                                                                                                                                                                                                                                                                                                                                                                                                                                                                                                                                                                                                                                                                                                                                                                                                                      |   |          |          |          |   |          |         |          |   |          |          |          |   |          |         |          |   |          |         |          |   |          |          |          |   |          |          |          |   |         |         |          |   |          |         |          |   |          |         |          |   |          |         |          |   |          |          |         |   |          |          |         |   |         |          |         |   |          |          |         |   |         |          |         |   |         |          |          |   |          |          |          |   |          |          |          |   |          |         |          |   |         |          |          |   |         |          |          |   |         |          |          |   |         |          |          |   |         |          |          |   |         |          |          |   |         |          |          |   |         |          |          |   |         |         |          |   |         |         |          |   |         |         |          |   |         |         |          |   |         |         |          |   |          |          |         |   |          |         |         |   |          |         |         |   |          |         |         |   |          |         |         |   |          |          |         |   |          |          |         |   |          |          |         |   |          |          |         |
| C                                                                                                                                                                                                                     | 0.40570                                                                                                                                                                                                                                                                                                                                                                                                                                                                                                                                                                                                                                                                                                                                                                                                                                                                                                                                                                                                                                                                                                                                                                                                                                                                                                                                                                                                                                                                                                                                                                                                                                                                                                                                                                                                                                                                                                                                                                                                                                                                                                                                                                                                                                                                                                                                                                                                                                                                                                                                                                                                                                                                                                                                                                                                                                                                                                                                                                                                                                                                            | 0.04780  | 0.57033  |         |          |   |          |         |          |   |          |          |          |   |          |         |          |   |          |         |          |   |          |          |          |   |          |          |          |   |          |         |          |   |          |         |         |   |          |         |         |   |         |         |         |   |          |         |         |   |          |         |         |   |         |         |         |   |          |         |         |   |          |         |         |   |         |         |         |   |          |         |          |   |          |         |          |   |          |         |         |   |         |         |          |   |         |          |          |   |         |          |          |   |         |          |          |   |         |          |         |   |         |         |         |   |         |         |         |   |          |         |         |   |          |         |         |   |          |         |          |   |          |         |          |                                                                                                                                                                                                                       |                                                                                                                                                                                                                                                                                                                                                                                                                                                                                                                                                                                                                                                                                                                                                                                                                                                                                                                                                                                                                                                                                                                                                                                                                                                                                                                                                                                                                                                                                                                                                                                                                                                                                                                                                                                                                                                                                                                                                                                                                                                                                                                                                                                                                                                                                |         |          |          |          |         |          |          |          |          |          |          |          |          |         |          |          |          |          |         |          |          |         |          |          |          |         |          |          |          |          |         |          |          |          |         |         |          |          |         |          |          |          |                                                                                                                                                                                                                        |                                                                                                                                                                                                                                                                                                                                                                                                                                                                                                                                                                                                                                                                                                                                                                                                                                                                                                                                                                                                                                                                                                                                                                                                                                                                                                                                                                                                                                                                                                                                                                                                                                                                                                                                                                                                                                                                                                                                                                                                                                                                                                                                                                                                                                                                                                                                                                                                                                                                                                                                                                                                                                                                                                                                                                                                                                                                                                                                                                                                                                                                                      |   |          |          |          |   |          |         |          |   |          |          |          |   |          |         |          |   |          |         |          |   |          |          |          |   |          |          |          |   |         |         |          |   |          |         |          |   |          |         |          |   |          |         |          |   |          |          |         |   |          |          |         |   |         |          |         |   |          |          |         |   |         |          |         |   |         |          |          |   |          |          |          |   |          |          |          |   |          |         |          |   |         |          |          |   |         |          |          |   |         |          |          |   |         |          |          |   |         |          |          |   |         |          |          |   |         |          |          |   |         |          |          |   |         |         |          |   |         |         |          |   |         |         |          |   |         |         |          |   |         |         |          |   |          |          |         |   |          |         |         |   |          |         |         |   |          |         |         |   |          |         |         |   |          |          |         |   |          |          |         |   |          |          |         |   |          |          |         |
| C                                                                                                                                                                                                                     | 2.19859                                                                                                                                                                                                                                                                                                                                                                                                                                                                                                                                                                                                                                                                                                                                                                                                                                                                                                                                                                                                                                                                                                                                                                                                                                                                                                                                                                                                                                                                                                                                                                                                                                                                                                                                                                                                                                                                                                                                                                                                                                                                                                                                                                                                                                                                                                                                                                                                                                                                                                                                                                                                                                                                                                                                                                                                                                                                                                                                                                                                                                                                            | 0.00150  | 2.85105  |         |          |   |          |         |          |   |          |          |          |   |          |         |          |   |          |         |          |   |          |          |          |   |          |          |          |   |          |         |          |   |          |         |         |   |          |         |         |   |         |         |         |   |          |         |         |   |          |         |         |   |         |         |         |   |          |         |         |   |          |         |         |   |         |         |         |   |          |         |          |   |          |         |          |   |          |         |         |   |         |         |          |   |         |          |          |   |         |          |          |   |         |          |          |   |         |          |         |   |         |         |         |   |         |         |         |   |          |         |         |   |          |         |         |   |          |         |          |   |          |         |          |                                                                                                                                                                                                                       |                                                                                                                                                                                                                                                                                                                                                                                                                                                                                                                                                                                                                                                                                                                                                                                                                                                                                                                                                                                                                                                                                                                                                                                                                                                                                                                                                                                                                                                                                                                                                                                                                                                                                                                                                                                                                                                                                                                                                                                                                                                                                                                                                                                                                                                                                |         |          |          |          |         |          |          |          |          |          |          |          |          |         |          |          |          |          |         |          |          |         |          |          |          |         |          |          |          |          |         |          |          |          |         |         |          |          |         |          |          |          |                                                                                                                                                                                                                        |                                                                                                                                                                                                                                                                                                                                                                                                                                                                                                                                                                                                                                                                                                                                                                                                                                                                                                                                                                                                                                                                                                                                                                                                                                                                                                                                                                                                                                                                                                                                                                                                                                                                                                                                                                                                                                                                                                                                                                                                                                                                                                                                                                                                                                                                                                                                                                                                                                                                                                                                                                                                                                                                                                                                                                                                                                                                                                                                                                                                                                                                                      |   |          |          |          |   |          |         |          |   |          |          |          |   |          |         |          |   |          |         |          |   |          |          |          |   |          |          |          |   |         |         |          |   |          |         |          |   |          |         |          |   |          |         |          |   |          |          |         |   |          |          |         |   |         |          |         |   |          |          |         |   |         |          |         |   |         |          |          |   |          |          |          |   |          |          |          |   |          |         |          |   |         |          |          |   |         |          |          |   |         |          |          |   |         |          |          |   |         |          |          |   |         |          |          |   |         |          |          |   |         |          |          |   |         |         |          |   |         |         |          |   |         |         |          |   |         |         |          |   |         |         |          |   |          |          |         |   |          |         |         |   |          |         |         |   |          |         |         |   |          |         |         |   |          |          |         |   |          |          |         |   |          |          |         |   |          |          |         |
| C                                                                                                                                                                                                                     | 1.84366                                                                                                                                                                                                                                                                                                                                                                                                                                                                                                                                                                                                                                                                                                                                                                                                                                                                                                                                                                                                                                                                                                                                                                                                                                                                                                                                                                                                                                                                                                                                                                                                                                                                                                                                                                                                                                                                                                                                                                                                                                                                                                                                                                                                                                                                                                                                                                                                                                                                                                                                                                                                                                                                                                                                                                                                                                                                                                                                                                                                                                                                            | 0.02598  | 0.43742  |         |          |   |          |         |          |   |          |          |          |   |          |         |          |   |          |         |          |   |          |          |          |   |          |          |          |   |          |         |          |   |          |         |         |   |          |         |         |   |         |         |         |   |          |         |         |   |          |         |         |   |         |         |         |   |          |         |         |   |          |         |         |   |         |         |         |   |          |         |          |   |          |         |          |   |          |         |         |   |         |         |          |   |         |          |          |   |         |          |          |   |         |          |          |   |         |          |         |   |         |         |         |   |         |         |         |   |          |         |         |   |          |         |         |   |          |         |          |   |          |         |          |                                                                                                                                                                                                                       |                                                                                                                                                                                                                                                                                                                                                                                                                                                                                                                                                                                                                                                                                                                                                                                                                                                                                                                                                                                                                                                                                                                                                                                                                                                                                                                                                                                                                                                                                                                                                                                                                                                                                                                                                                                                                                                                                                                                                                                                                                                                                                                                                                                                                                                                                |         |          |          |          |         |          |          |          |          |          |          |          |          |         |          |          |          |          |         |          |          |         |          |          |          |         |          |          |          |          |         |          |          |          |         |         |          |          |         |          |          |          |                                                                                                                                                                                                                        |                                                                                                                                                                                                                                                                                                                                                                                                                                                                                                                                                                                                                                                                                                                                                                                                                                                                                                                                                                                                                                                                                                                                                                                                                                                                                                                                                                                                                                                                                                                                                                                                                                                                                                                                                                                                                                                                                                                                                                                                                                                                                                                                                                                                                                                                                                                                                                                                                                                                                                                                                                                                                                                                                                                                                                                                                                                                                                                                                                                                                                                                                      |   |          |          |          |   |          |         |          |   |          |          |          |   |          |         |          |   |          |         |          |   |          |          |          |   |          |          |          |   |         |         |          |   |          |         |          |   |          |         |          |   |          |         |          |   |          |          |         |   |          |          |         |   |         |          |         |   |          |          |         |   |         |          |         |   |         |          |          |   |          |          |          |   |          |          |          |   |          |         |          |   |         |          |          |   |         |          |          |   |         |          |          |   |         |          |          |   |         |          |          |   |         |          |          |   |         |          |          |   |         |          |          |   |         |         |          |   |         |         |          |   |         |         |          |   |         |         |          |   |         |         |          |   |          |          |         |   |          |         |         |   |          |         |         |   |          |         |         |   |          |         |         |   |          |          |         |   |          |          |         |   |          |          |         |   |          |          |         |
| C                                                                                                                                                                                                                     | 0.00202                                                                                                                                                                                                                                                                                                                                                                                                                                                                                                                                                                                                                                                                                                                                                                                                                                                                                                                                                                                                                                                                                                                                                                                                                                                                                                                                                                                                                                                                                                                                                                                                                                                                                                                                                                                                                                                                                                                                                                                                                                                                                                                                                                                                                                                                                                                                                                                                                                                                                                                                                                                                                                                                                                                                                                                                                                                                                                                                                                                                                                                                            | -0.06431 | 1.91943  |         |          |   |          |         |          |   |          |          |          |   |          |         |          |   |          |         |          |   |          |          |          |   |          |          |          |   |          |         |          |   |          |         |         |   |          |         |         |   |         |         |         |   |          |         |         |   |          |         |         |   |         |         |         |   |          |         |         |   |          |         |         |   |         |         |         |   |          |         |          |   |          |         |          |   |          |         |         |   |         |         |          |   |         |          |          |   |         |          |          |   |         |          |          |   |         |          |         |   |         |         |         |   |         |         |         |   |          |         |         |   |          |         |         |   |          |         |          |   |          |         |          |                                                                                                                                                                                                                       |                                                                                                                                                                                                                                                                                                                                                                                                                                                                                                                                                                                                                                                                                                                                                                                                                                                                                                                                                                                                                                                                                                                                                                                                                                                                                                                                                                                                                                                                                                                                                                                                                                                                                                                                                                                                                                                                                                                                                                                                                                                                                                                                                                                                                                                                                |         |          |          |          |         |          |          |          |          |          |          |          |          |         |          |          |          |          |         |          |          |         |          |          |          |         |          |          |          |          |         |          |          |          |         |         |          |          |         |          |          |          |                                                                                                                                                                                                                        |                                                                                                                                                                                                                                                                                                                                                                                                                                                                                                                                                                                                                                                                                                                                                                                                                                                                                                                                                                                                                                                                                                                                                                                                                                                                                                                                                                                                                                                                                                                                                                                                                                                                                                                                                                                                                                                                                                                                                                                                                                                                                                                                                                                                                                                                                                                                                                                                                                                                                                                                                                                                                                                                                                                                                                                                                                                                                                                                                                                                                                                                                      |   |          |          |          |   |          |         |          |   |          |          |          |   |          |         |          |   |          |         |          |   |          |          |          |   |          |          |          |   |         |         |          |   |          |         |          |   |          |         |          |   |          |         |          |   |          |          |         |   |          |          |         |   |         |          |         |   |          |          |         |   |         |          |         |   |         |          |          |   |          |          |          |   |          |          |          |   |          |         |          |   |         |          |          |   |         |          |          |   |         |          |          |   |         |          |          |   |         |          |          |   |         |          |          |   |         |          |          |   |         |          |          |   |         |         |          |   |         |         |          |   |         |         |          |   |         |         |          |   |         |         |          |   |          |          |         |   |          |         |         |   |          |         |         |   |          |         |         |   |          |         |         |   |          |          |         |   |          |          |         |   |          |          |         |   |          |          |         |
| C                                                                                                                                                                                                                     | 0.83458                                                                                                                                                                                                                                                                                                                                                                                                                                                                                                                                                                                                                                                                                                                                                                                                                                                                                                                                                                                                                                                                                                                                                                                                                                                                                                                                                                                                                                                                                                                                                                                                                                                                                                                                                                                                                                                                                                                                                                                                                                                                                                                                                                                                                                                                                                                                                                                                                                                                                                                                                                                                                                                                                                                                                                                                                                                                                                                                                                                                                                                                            | -0.09339 | 3.02337  |         |          |   |          |         |          |   |          |          |          |   |          |         |          |   |          |         |          |   |          |          |          |   |          |          |          |   |          |         |          |   |          |         |         |   |          |         |         |   |         |         |         |   |          |         |         |   |          |         |         |   |         |         |         |   |          |         |         |   |          |         |         |   |         |         |         |   |          |         |          |   |          |         |          |   |          |         |         |   |         |         |          |   |         |          |          |   |         |          |          |   |         |          |          |   |         |          |         |   |         |         |         |   |         |         |         |   |          |         |         |   |          |         |         |   |          |         |          |   |          |         |          |                                                                                                                                                                                                                       |                                                                                                                                                                                                                                                                                                                                                                                                                                                                                                                                                                                                                                                                                                                                                                                                                                                                                                                                                                                                                                                                                                                                                                                                                                                                                                                                                                                                                                                                                                                                                                                                                                                                                                                                                                                                                                                                                                                                                                                                                                                                                                                                                                                                                                                                                |         |          |          |          |         |          |          |          |          |          |          |          |          |         |          |          |          |          |         |          |          |         |          |          |          |         |          |          |          |          |         |          |          |          |         |         |          |          |         |          |          |          |                                                                                                                                                                                                                        |                                                                                                                                                                                                                                                                                                                                                                                                                                                                                                                                                                                                                                                                                                                                                                                                                                                                                                                                                                                                                                                                                                                                                                                                                                                                                                                                                                                                                                                                                                                                                                                                                                                                                                                                                                                                                                                                                                                                                                                                                                                                                                                                                                                                                                                                                                                                                                                                                                                                                                                                                                                                                                                                                                                                                                                                                                                                                                                                                                                                                                                                                      |   |          |          |          |   |          |         |          |   |          |          |          |   |          |         |          |   |          |         |          |   |          |          |          |   |          |          |          |   |         |         |          |   |          |         |          |   |          |         |          |   |          |         |          |   |          |          |         |   |          |          |         |   |         |          |         |   |          |          |         |   |         |          |         |   |         |          |          |   |          |          |          |   |          |          |          |   |          |         |          |   |         |          |          |   |         |          |          |   |         |          |          |   |         |          |          |   |         |          |          |   |         |          |          |   |         |          |          |   |         |          |          |   |         |         |          |   |         |         |          |   |         |         |          |   |         |         |          |   |         |         |          |   |          |          |         |   |          |         |         |   |          |         |         |   |          |         |         |   |          |         |         |   |          |          |         |   |          |          |         |   |          |          |         |   |          |          |         |
| C                                                                                                                                                                                                                     | 2.67748                                                                                                                                                                                                                                                                                                                                                                                                                                                                                                                                                                                                                                                                                                                                                                                                                                                                                                                                                                                                                                                                                                                                                                                                                                                                                                                                                                                                                                                                                                                                                                                                                                                                                                                                                                                                                                                                                                                                                                                                                                                                                                                                                                                                                                                                                                                                                                                                                                                                                                                                                                                                                                                                                                                                                                                                                                                                                                                                                                                                                                                                            | 0.03800  | 1.55282  |         |          |   |          |         |          |   |          |          |          |   |          |         |          |   |          |         |          |   |          |          |          |   |          |          |          |   |          |         |          |   |          |         |         |   |          |         |         |   |         |         |         |   |          |         |         |   |          |         |         |   |         |         |         |   |          |         |         |   |          |         |         |   |         |         |         |   |          |         |          |   |          |         |          |   |          |         |         |   |         |         |          |   |         |          |          |   |         |          |          |   |         |          |          |   |         |          |         |   |         |         |         |   |         |         |         |   |          |         |         |   |          |         |         |   |          |         |          |   |          |         |          |                                                                                                                                                                                                                       |                                                                                                                                                                                                                                                                                                                                                                                                                                                                                                                                                                                                                                                                                                                                                                                                                                                                                                                                                                                                                                                                                                                                                                                                                                                                                                                                                                                                                                                                                                                                                                                                                                                                                                                                                                                                                                                                                                                                                                                                                                                                                                                                                                                                                                                                                |         |          |          |          |         |          |          |          |          |          |          |          |          |         |          |          |          |          |         |          |          |         |          |          |          |         |          |          |          |          |         |          |          |          |         |         |          |          |         |          |          |          |                                                                                                                                                                                                                        |                                                                                                                                                                                                                                                                                                                                                                                                                                                                                                                                                                                                                                                                                                                                                                                                                                                                                                                                                                                                                                                                                                                                                                                                                                                                                                                                                                                                                                                                                                                                                                                                                                                                                                                                                                                                                                                                                                                                                                                                                                                                                                                                                                                                                                                                                                                                                                                                                                                                                                                                                                                                                                                                                                                                                                                                                                                                                                                                                                                                                                                                                      |   |          |          |          |   |          |         |          |   |          |          |          |   |          |         |          |   |          |         |          |   |          |          |          |   |          |          |          |   |         |         |          |   |          |         |          |   |          |         |          |   |          |         |          |   |          |          |         |   |          |          |         |   |         |          |         |   |          |          |         |   |         |          |         |   |         |          |          |   |          |          |          |   |          |          |          |   |          |         |          |   |         |          |          |   |         |          |          |   |         |          |          |   |         |          |          |   |         |          |          |   |         |          |          |   |         |          |          |   |         |          |          |   |         |         |          |   |         |         |          |   |         |         |          |   |         |         |          |   |         |         |          |   |          |          |         |   |          |         |         |   |          |         |         |   |          |         |         |   |          |         |         |   |          |          |         |   |          |          |         |   |          |          |         |   |          |          |         |
| H                                                                                                                                                                                                                     | -1.05045                                                                                                                                                                                                                                                                                                                                                                                                                                                                                                                                                                                                                                                                                                                                                                                                                                                                                                                                                                                                                                                                                                                                                                                                                                                                                                                                                                                                                                                                                                                                                                                                                                                                                                                                                                                                                                                                                                                                                                                                                                                                                                                                                                                                                                                                                                                                                                                                                                                                                                                                                                                                                                                                                                                                                                                                                                                                                                                                                                                                                                                                           | -0.17230 | 2.09261  |         |          |   |          |         |          |   |          |          |          |   |          |         |          |   |          |         |          |   |          |          |          |   |          |          |          |   |          |         |          |   |          |         |         |   |          |         |         |   |         |         |         |   |          |         |         |   |          |         |         |   |         |         |         |   |          |         |         |   |          |         |         |   |         |         |         |   |          |         |          |   |          |         |          |   |          |         |         |   |         |         |          |   |         |          |          |   |         |          |          |   |         |          |          |   |         |          |         |   |         |         |         |   |         |         |         |   |          |         |         |   |          |         |         |   |          |         |          |   |          |         |          |                                                                                                                                                                                                                       |                                                                                                                                                                                                                                                                                                                                                                                                                                                                                                                                                                                                                                                                                                                                                                                                                                                                                                                                                                                                                                                                                                                                                                                                                                                                                                                                                                                                                                                                                                                                                                                                                                                                                                                                                                                                                                                                                                                                                                                                                                                                                                                                                                                                                                                                                |         |          |          |          |         |          |          |          |          |          |          |          |          |         |          |          |          |          |         |          |          |         |          |          |          |         |          |          |          |          |         |          |          |          |         |         |          |          |         |          |          |          |                                                                                                                                                                                                                        |                                                                                                                                                                                                                                                                                                                                                                                                                                                                                                                                                                                                                                                                                                                                                                                                                                                                                                                                                                                                                                                                                                                                                                                                                                                                                                                                                                                                                                                                                                                                                                                                                                                                                                                                                                                                                                                                                                                                                                                                                                                                                                                                                                                                                                                                                                                                                                                                                                                                                                                                                                                                                                                                                                                                                                                                                                                                                                                                                                                                                                                                                      |   |          |          |          |   |          |         |          |   |          |          |          |   |          |         |          |   |          |         |          |   |          |          |          |   |          |          |          |   |         |         |          |   |          |         |          |   |          |         |          |   |          |         |          |   |          |          |         |   |          |          |         |   |         |          |         |   |          |          |         |   |         |          |         |   |         |          |          |   |          |          |          |   |          |          |          |   |          |         |          |   |         |          |          |   |         |          |          |   |         |          |          |   |         |          |          |   |         |          |          |   |         |          |          |   |         |          |          |   |         |          |          |   |         |         |          |   |         |         |          |   |         |         |          |   |         |         |          |   |         |         |          |   |          |          |         |   |          |         |         |   |          |         |         |   |          |         |         |   |          |         |         |   |          |          |         |   |          |          |         |   |          |          |         |   |          |          |         |
| H                                                                                                                                                                                                                     | 0.39896                                                                                                                                                                                                                                                                                                                                                                                                                                                                                                                                                                                                                                                                                                                                                                                                                                                                                                                                                                                                                                                                                                                                                                                                                                                                                                                                                                                                                                                                                                                                                                                                                                                                                                                                                                                                                                                                                                                                                                                                                                                                                                                                                                                                                                                                                                                                                                                                                                                                                                                                                                                                                                                                                                                                                                                                                                                                                                                                                                                                                                                                            | -0.18193 | 4.00924  |         |          |   |          |         |          |   |          |          |          |   |          |         |          |   |          |         |          |   |          |          |          |   |          |          |          |   |          |         |          |   |          |         |         |   |          |         |         |   |         |         |         |   |          |         |         |   |          |         |         |   |         |         |         |   |          |         |         |   |          |         |         |   |         |         |         |   |          |         |          |   |          |         |          |   |          |         |         |   |         |         |          |   |         |          |          |   |         |          |          |   |         |          |          |   |         |          |         |   |         |         |         |   |         |         |         |   |          |         |         |   |          |         |         |   |          |         |          |   |          |         |          |                                                                                                                                                                                                                       |                                                                                                                                                                                                                                                                                                                                                                                                                                                                                                                                                                                                                                                                                                                                                                                                                                                                                                                                                                                                                                                                                                                                                                                                                                                                                                                                                                                                                                                                                                                                                                                                                                                                                                                                                                                                                                                                                                                                                                                                                                                                                                                                                                                                                                                                                |         |          |          |          |         |          |          |          |          |          |          |          |          |         |          |          |          |          |         |          |          |         |          |          |          |         |          |          |          |          |         |          |          |          |         |         |          |          |         |          |          |          |                                                                                                                                                                                                                        |                                                                                                                                                                                                                                                                                                                                                                                                                                                                                                                                                                                                                                                                                                                                                                                                                                                                                                                                                                                                                                                                                                                                                                                                                                                                                                                                                                                                                                                                                                                                                                                                                                                                                                                                                                                                                                                                                                                                                                                                                                                                                                                                                                                                                                                                                                                                                                                                                                                                                                                                                                                                                                                                                                                                                                                                                                                                                                                                                                                                                                                                                      |   |          |          |          |   |          |         |          |   |          |          |          |   |          |         |          |   |          |         |          |   |          |          |          |   |          |          |          |   |         |         |          |   |          |         |          |   |          |         |          |   |          |         |          |   |          |          |         |   |          |          |         |   |         |          |         |   |          |          |         |   |         |          |         |   |         |          |          |   |          |          |          |   |          |          |          |   |          |         |          |   |         |          |          |   |         |          |          |   |         |          |          |   |         |          |          |   |         |          |          |   |         |          |          |   |         |          |          |   |         |          |          |   |         |         |          |   |         |         |          |   |         |         |          |   |         |         |          |   |         |         |          |   |          |          |         |   |          |         |         |   |          |         |         |   |          |         |         |   |          |         |         |   |          |          |         |   |          |          |         |   |          |          |         |   |          |          |         |
| H                                                                                                                                                                                                                     | 3.74524                                                                                                                                                                                                                                                                                                                                                                                                                                                                                                                                                                                                                                                                                                                                                                                                                                                                                                                                                                                                                                                                                                                                                                                                                                                                                                                                                                                                                                                                                                                                                                                                                                                                                                                                                                                                                                                                                                                                                                                                                                                                                                                                                                                                                                                                                                                                                                                                                                                                                                                                                                                                                                                                                                                                                                                                                                                                                                                                                                                                                                                                            | 0.06230  | 1.44079  |         |          |   |          |         |          |   |          |          |          |   |          |         |          |   |          |         |          |   |          |          |          |   |          |          |          |   |          |         |          |   |          |         |         |   |          |         |         |   |         |         |         |   |          |         |         |   |          |         |         |   |         |         |         |   |          |         |         |   |          |         |         |   |         |         |         |   |          |         |          |   |          |         |          |   |          |         |         |   |         |         |          |   |         |          |          |   |         |          |          |   |         |          |          |   |         |          |         |   |         |         |         |   |         |         |         |   |          |         |         |   |          |         |         |   |          |         |          |   |          |         |          |                                                                                                                                                                                                                       |                                                                                                                                                                                                                                                                                                                                                                                                                                                                                                                                                                                                                                                                                                                                                                                                                                                                                                                                                                                                                                                                                                                                                                                                                                                                                                                                                                                                                                                                                                                                                                                                                                                                                                                                                                                                                                                                                                                                                                                                                                                                                                                                                                                                                                                                                |         |          |          |          |         |          |          |          |          |          |          |          |          |         |          |          |          |          |         |          |          |         |          |          |          |         |          |          |          |          |         |          |          |          |         |         |          |          |         |          |          |          |                                                                                                                                                                                                                        |                                                                                                                                                                                                                                                                                                                                                                                                                                                                                                                                                                                                                                                                                                                                                                                                                                                                                                                                                                                                                                                                                                                                                                                                                                                                                                                                                                                                                                                                                                                                                                                                                                                                                                                                                                                                                                                                                                                                                                                                                                                                                                                                                                                                                                                                                                                                                                                                                                                                                                                                                                                                                                                                                                                                                                                                                                                                                                                                                                                                                                                                                      |   |          |          |          |   |          |         |          |   |          |          |          |   |          |         |          |   |          |         |          |   |          |          |          |   |          |          |          |   |         |         |          |   |          |         |          |   |          |         |          |   |          |         |          |   |          |          |         |   |          |          |         |   |         |          |         |   |          |          |         |   |         |          |         |   |         |          |          |   |          |          |          |   |          |          |          |   |          |         |          |   |         |          |          |   |         |          |          |   |         |          |          |   |         |          |          |   |         |          |          |   |         |          |          |   |         |          |          |   |         |          |          |   |         |         |          |   |         |         |          |   |         |         |          |   |         |         |          |   |         |         |          |   |          |          |         |   |          |         |         |   |          |         |         |   |          |         |         |   |          |         |         |   |          |          |         |   |          |          |         |   |          |          |         |   |          |          |         |
| H                                                                                                                                                                                                                     | -1.01537                                                                                                                                                                                                                                                                                                                                                                                                                                                                                                                                                                                                                                                                                                                                                                                                                                                                                                                                                                                                                                                                                                                                                                                                                                                                                                                                                                                                                                                                                                                                                                                                                                                                                                                                                                                                                                                                                                                                                                                                                                                                                                                                                                                                                                                                                                                                                                                                                                                                                                                                                                                                                                                                                                                                                                                                                                                                                                                                                                                                                                                                           | 0.47439  | -3.88305 |         |          |   |          |         |          |   |          |          |          |   |          |         |          |   |          |         |          |   |          |          |          |   |          |          |          |   |          |         |          |   |          |         |         |   |          |         |         |   |         |         |         |   |          |         |         |   |          |         |         |   |         |         |         |   |          |         |         |   |          |         |         |   |         |         |         |   |          |         |          |   |          |         |          |   |          |         |         |   |         |         |          |   |         |          |          |   |         |          |          |   |         |          |          |   |         |          |         |   |         |         |         |   |         |         |         |   |          |         |         |   |          |         |         |   |          |         |          |   |          |         |          |                                                                                                                                                                                                                       |                                                                                                                                                                                                                                                                                                                                                                                                                                                                                                                                                                                                                                                                                                                                                                                                                                                                                                                                                                                                                                                                                                                                                                                                                                                                                                                                                                                                                                                                                                                                                                                                                                                                                                                                                                                                                                                                                                                                                                                                                                                                                                                                                                                                                                                                                |         |          |          |          |         |          |          |          |          |          |          |          |          |         |          |          |          |          |         |          |          |         |          |          |          |         |          |          |          |          |         |          |          |          |         |         |          |          |         |          |          |          |                                                                                                                                                                                                                        |                                                                                                                                                                                                                                                                                                                                                                                                                                                                                                                                                                                                                                                                                                                                                                                                                                                                                                                                                                                                                                                                                                                                                                                                                                                                                                                                                                                                                                                                                                                                                                                                                                                                                                                                                                                                                                                                                                                                                                                                                                                                                                                                                                                                                                                                                                                                                                                                                                                                                                                                                                                                                                                                                                                                                                                                                                                                                                                                                                                                                                                                                      |   |          |          |          |   |          |         |          |   |          |          |          |   |          |         |          |   |          |         |          |   |          |          |          |   |          |          |          |   |         |         |          |   |          |         |          |   |          |         |          |   |          |         |          |   |          |          |         |   |          |          |         |   |         |          |         |   |          |          |         |   |         |          |         |   |         |          |          |   |          |          |          |   |          |          |          |   |          |         |          |   |         |          |          |   |         |          |          |   |         |          |          |   |         |          |          |   |         |          |          |   |         |          |          |   |         |          |          |   |         |          |          |   |         |         |          |   |         |         |          |   |         |         |          |   |         |         |          |   |         |         |          |   |          |          |         |   |          |         |         |   |          |         |         |   |          |         |         |   |          |         |         |   |          |          |         |   |          |          |         |   |          |          |         |   |          |          |         |
| H                                                                                                                                                                                                                     | -3.36482                                                                                                                                                                                                                                                                                                                                                                                                                                                                                                                                                                                                                                                                                                                                                                                                                                                                                                                                                                                                                                                                                                                                                                                                                                                                                                                                                                                                                                                                                                                                                                                                                                                                                                                                                                                                                                                                                                                                                                                                                                                                                                                                                                                                                                                                                                                                                                                                                                                                                                                                                                                                                                                                                                                                                                                                                                                                                                                                                                                                                                                                           | -0.25228 | -3.38223 |         |          |   |          |         |          |   |          |          |          |   |          |         |          |   |          |         |          |   |          |          |          |   |          |          |          |   |          |         |          |   |          |         |         |   |          |         |         |   |         |         |         |   |          |         |         |   |          |         |         |   |         |         |         |   |          |         |         |   |          |         |         |   |         |         |         |   |          |         |          |   |          |         |          |   |          |         |         |   |         |         |          |   |         |          |          |   |         |          |          |   |         |          |          |   |         |          |         |   |         |         |         |   |         |         |         |   |          |         |         |   |          |         |         |   |          |         |          |   |          |         |          |                                                                                                                                                                                                                       |                                                                                                                                                                                                                                                                                                                                                                                                                                                                                                                                                                                                                                                                                                                                                                                                                                                                                                                                                                                                                                                                                                                                                                                                                                                                                                                                                                                                                                                                                                                                                                                                                                                                                                                                                                                                                                                                                                                                                                                                                                                                                                                                                                                                                                                                                |         |          |          |          |         |          |          |          |          |          |          |          |          |         |          |          |          |          |         |          |          |         |          |          |          |         |          |          |          |          |         |          |          |          |         |         |          |          |         |          |          |          |                                                                                                                                                                                                                        |                                                                                                                                                                                                                                                                                                                                                                                                                                                                                                                                                                                                                                                                                                                                                                                                                                                                                                                                                                                                                                                                                                                                                                                                                                                                                                                                                                                                                                                                                                                                                                                                                                                                                                                                                                                                                                                                                                                                                                                                                                                                                                                                                                                                                                                                                                                                                                                                                                                                                                                                                                                                                                                                                                                                                                                                                                                                                                                                                                                                                                                                                      |   |          |          |          |   |          |         |          |   |          |          |          |   |          |         |          |   |          |         |          |   |          |          |          |   |          |          |          |   |         |         |          |   |          |         |          |   |          |         |          |   |          |         |          |   |          |          |         |   |          |          |         |   |         |          |         |   |          |          |         |   |         |          |         |   |         |          |          |   |          |          |          |   |          |          |          |   |          |         |          |   |         |          |          |   |         |          |          |   |         |          |          |   |         |          |          |   |         |          |          |   |         |          |          |   |         |          |          |   |         |          |          |   |         |         |          |   |         |         |          |   |         |         |          |   |         |         |          |   |         |         |          |   |          |          |         |   |          |         |         |   |          |         |         |   |          |         |         |   |          |         |         |   |          |          |         |   |          |          |         |   |          |          |         |   |          |          |         |
| H                                                                                                                                                                                                                     | 2.88749                                                                                                                                                                                                                                                                                                                                                                                                                                                                                                                                                                                                                                                                                                                                                                                                                                                                                                                                                                                                                                                                                                                                                                                                                                                                                                                                                                                                                                                                                                                                                                                                                                                                                                                                                                                                                                                                                                                                                                                                                                                                                                                                                                                                                                                                                                                                                                                                                                                                                                                                                                                                                                                                                                                                                                                                                                                                                                                                                                                                                                                                            | 0.02063  | 3.68352  |         |          |   |          |         |          |   |          |          |          |   |          |         |          |   |          |         |          |   |          |          |          |   |          |          |          |   |          |         |          |   |          |         |         |   |          |         |         |   |         |         |         |   |          |         |         |   |          |         |         |   |         |         |         |   |          |         |         |   |          |         |         |   |         |         |         |   |          |         |          |   |          |         |          |   |          |         |         |   |         |         |          |   |         |          |          |   |         |          |          |   |         |          |          |   |         |          |         |   |         |         |         |   |         |         |         |   |          |         |         |   |          |         |         |   |          |         |          |   |          |         |          |                                                                                                                                                                                                                       |                                                                                                                                                                                                                                                                                                                                                                                                                                                                                                                                                                                                                                                                                                                                                                                                                                                                                                                                                                                                                                                                                                                                                                                                                                                                                                                                                                                                                                                                                                                                                                                                                                                                                                                                                                                                                                                                                                                                                                                                                                                                                                                                                                                                                                                                                |         |          |          |          |         |          |          |          |          |          |          |          |          |         |          |          |          |          |         |          |          |         |          |          |          |         |          |          |          |          |         |          |          |          |         |         |          |          |         |          |          |          |                                                                                                                                                                                                                        |                                                                                                                                                                                                                                                                                                                                                                                                                                                                                                                                                                                                                                                                                                                                                                                                                                                                                                                                                                                                                                                                                                                                                                                                                                                                                                                                                                                                                                                                                                                                                                                                                                                                                                                                                                                                                                                                                                                                                                                                                                                                                                                                                                                                                                                                                                                                                                                                                                                                                                                                                                                                                                                                                                                                                                                                                                                                                                                                                                                                                                                                                      |   |          |          |          |   |          |         |          |   |          |          |          |   |          |         |          |   |          |         |          |   |          |          |          |   |          |          |          |   |         |         |          |   |          |         |          |   |          |         |          |   |          |         |          |   |          |          |         |   |          |          |         |   |         |          |         |   |          |          |         |   |         |          |         |   |         |          |          |   |          |          |          |   |          |          |          |   |          |         |          |   |         |          |          |   |         |          |          |   |         |          |          |   |         |          |          |   |         |          |          |   |         |          |          |   |         |          |          |   |         |          |          |   |         |         |          |   |         |         |          |   |         |         |          |   |         |         |          |   |         |         |          |   |          |          |         |   |          |         |         |   |          |         |         |   |          |         |         |   |          |         |         |   |          |          |         |   |          |          |         |   |          |          |         |   |          |          |         |
| N                                                                                                                                                                                                                     | 2.60114                                                                                                                                                                                                                                                                                                                                                                                                                                                                                                                                                                                                                                                                                                                                                                                                                                                                                                                                                                                                                                                                                                                                                                                                                                                                                                                                                                                                                                                                                                                                                                                                                                                                                                                                                                                                                                                                                                                                                                                                                                                                                                                                                                                                                                                                                                                                                                                                                                                                                                                                                                                                                                                                                                                                                                                                                                                                                                                                                                                                                                                                            | -0.02285 | -0.88353 |         |          |   |          |         |          |   |          |          |          |   |          |         |          |   |          |         |          |   |          |          |          |   |          |          |          |   |          |         |          |   |          |         |         |   |          |         |         |   |         |         |         |   |          |         |         |   |          |         |         |   |         |         |         |   |          |         |         |   |          |         |         |   |         |         |         |   |          |         |          |   |          |         |          |   |          |         |         |   |         |         |          |   |         |          |          |   |         |          |          |   |         |          |          |   |         |          |         |   |         |         |         |   |         |         |         |   |          |         |         |   |          |         |         |   |          |         |          |   |          |         |          |                                                                                                                                                                                                                       |                                                                                                                                                                                                                                                                                                                                                                                                                                                                                                                                                                                                                                                                                                                                                                                                                                                                                                                                                                                                                                                                                                                                                                                                                                                                                                                                                                                                                                                                                                                                                                                                                                                                                                                                                                                                                                                                                                                                                                                                                                                                                                                                                                                                                                                                                |         |          |          |          |         |          |          |          |          |          |          |          |          |         |          |          |          |          |         |          |          |         |          |          |          |         |          |          |          |          |         |          |          |          |         |         |          |          |         |          |          |          |                                                                                                                                                                                                                        |                                                                                                                                                                                                                                                                                                                                                                                                                                                                                                                                                                                                                                                                                                                                                                                                                                                                                                                                                                                                                                                                                                                                                                                                                                                                                                                                                                                                                                                                                                                                                                                                                                                                                                                                                                                                                                                                                                                                                                                                                                                                                                                                                                                                                                                                                                                                                                                                                                                                                                                                                                                                                                                                                                                                                                                                                                                                                                                                                                                                                                                                                      |   |          |          |          |   |          |         |          |   |          |          |          |   |          |         |          |   |          |         |          |   |          |          |          |   |          |          |          |   |         |         |          |   |          |         |          |   |          |         |          |   |          |         |          |   |          |          |         |   |          |          |         |   |         |          |         |   |          |          |         |   |         |          |         |   |         |          |          |   |          |          |          |   |          |          |          |   |          |         |          |   |         |          |          |   |         |          |          |   |         |          |          |   |         |          |          |   |         |          |          |   |         |          |          |   |         |          |          |   |         |          |          |   |         |         |          |   |         |         |          |   |         |         |          |   |         |         |          |   |         |         |          |   |          |          |         |   |          |         |         |   |          |         |         |   |          |         |         |   |          |         |         |   |          |          |         |   |          |          |         |   |          |          |         |   |          |          |         |
| C                                                                                                                                                                                                                     | 2.10402                                                                                                                                                                                                                                                                                                                                                                                                                                                                                                                                                                                                                                                                                                                                                                                                                                                                                                                                                                                                                                                                                                                                                                                                                                                                                                                                                                                                                                                                                                                                                                                                                                                                                                                                                                                                                                                                                                                                                                                                                                                                                                                                                                                                                                                                                                                                                                                                                                                                                                                                                                                                                                                                                                                                                                                                                                                                                                                                                                                                                                                                            | -1.19470 | -1.72150 |         |          |   |          |         |          |   |          |          |          |   |          |         |          |   |          |         |          |   |          |          |          |   |          |          |          |   |          |         |          |   |          |         |         |   |          |         |         |   |         |         |         |   |          |         |         |   |          |         |         |   |         |         |         |   |          |         |         |   |          |         |         |   |         |         |         |   |          |         |          |   |          |         |          |   |          |         |         |   |         |         |          |   |         |          |          |   |         |          |          |   |         |          |          |   |         |          |         |   |         |         |         |   |         |         |         |   |          |         |         |   |          |         |         |   |          |         |          |   |          |         |          |                                                                                                                                                                                                                       |                                                                                                                                                                                                                                                                                                                                                                                                                                                                                                                                                                                                                                                                                                                                                                                                                                                                                                                                                                                                                                                                                                                                                                                                                                                                                                                                                                                                                                                                                                                                                                                                                                                                                                                                                                                                                                                                                                                                                                                                                                                                                                                                                                                                                                                                                |         |          |          |          |         |          |          |          |          |          |          |          |          |         |          |          |          |          |         |          |          |         |          |          |          |         |          |          |          |          |         |          |          |          |         |         |          |          |         |          |          |          |                                                                                                                                                                                                                        |                                                                                                                                                                                                                                                                                                                                                                                                                                                                                                                                                                                                                                                                                                                                                                                                                                                                                                                                                                                                                                                                                                                                                                                                                                                                                                                                                                                                                                                                                                                                                                                                                                                                                                                                                                                                                                                                                                                                                                                                                                                                                                                                                                                                                                                                                                                                                                                                                                                                                                                                                                                                                                                                                                                                                                                                                                                                                                                                                                                                                                                                                      |   |          |          |          |   |          |         |          |   |          |          |          |   |          |         |          |   |          |         |          |   |          |          |          |   |          |          |          |   |         |         |          |   |          |         |          |   |          |         |          |   |          |         |          |   |          |          |         |   |          |          |         |   |         |          |         |   |          |          |         |   |         |          |         |   |         |          |          |   |          |          |          |   |          |          |          |   |          |         |          |   |         |          |          |   |         |          |          |   |         |          |          |   |         |          |          |   |         |          |          |   |         |          |          |   |         |          |          |   |         |          |          |   |         |         |          |   |         |         |          |   |         |         |          |   |         |         |          |   |         |         |          |   |          |          |         |   |          |         |         |   |          |         |         |   |          |         |         |   |          |         |         |   |          |          |         |   |          |          |         |   |          |          |         |   |          |          |         |
| H                                                                                                                                                                                                                     | 2.43923                                                                                                                                                                                                                                                                                                                                                                                                                                                                                                                                                                                                                                                                                                                                                                                                                                                                                                                                                                                                                                                                                                                                                                                                                                                                                                                                                                                                                                                                                                                                                                                                                                                                                                                                                                                                                                                                                                                                                                                                                                                                                                                                                                                                                                                                                                                                                                                                                                                                                                                                                                                                                                                                                                                                                                                                                                                                                                                                                                                                                                                                            | -1.04499 | -2.74519 |         |          |   |          |         |          |   |          |          |          |   |          |         |          |   |          |         |          |   |          |          |          |   |          |          |          |   |          |         |          |   |          |         |         |   |          |         |         |   |         |         |         |   |          |         |         |   |          |         |         |   |         |         |         |   |          |         |         |   |          |         |         |   |         |         |         |   |          |         |          |   |          |         |          |   |          |         |         |   |         |         |          |   |         |          |          |   |         |          |          |   |         |          |          |   |         |          |         |   |         |         |         |   |         |         |         |   |          |         |         |   |          |         |         |   |          |         |          |   |          |         |          |                                                                                                                                                                                                                       |                                                                                                                                                                                                                                                                                                                                                                                                                                                                                                                                                                                                                                                                                                                                                                                                                                                                                                                                                                                                                                                                                                                                                                                                                                                                                                                                                                                                                                                                                                                                                                                                                                                                                                                                                                                                                                                                                                                                                                                                                                                                                                                                                                                                                                                                                |         |          |          |          |         |          |          |          |          |          |          |          |          |         |          |          |          |          |         |          |          |         |          |          |          |         |          |          |          |          |         |          |          |          |         |         |          |          |         |          |          |          |                                                                                                                                                                                                                        |                                                                                                                                                                                                                                                                                                                                                                                                                                                                                                                                                                                                                                                                                                                                                                                                                                                                                                                                                                                                                                                                                                                                                                                                                                                                                                                                                                                                                                                                                                                                                                                                                                                                                                                                                                                                                                                                                                                                                                                                                                                                                                                                                                                                                                                                                                                                                                                                                                                                                                                                                                                                                                                                                                                                                                                                                                                                                                                                                                                                                                                                                      |   |          |          |          |   |          |         |          |   |          |          |          |   |          |         |          |   |          |         |          |   |          |          |          |   |          |          |          |   |         |         |          |   |          |         |          |   |          |         |          |   |          |         |          |   |          |          |         |   |          |          |         |   |         |          |         |   |          |          |         |   |         |          |         |   |         |          |          |   |          |          |          |   |          |          |          |   |          |         |          |   |         |          |          |   |         |          |          |   |         |          |          |   |         |          |          |   |         |          |          |   |         |          |          |   |         |          |          |   |         |          |          |   |         |         |          |   |         |         |          |   |         |         |          |   |         |         |          |   |         |         |          |   |          |          |         |   |          |         |         |   |          |         |         |   |          |         |         |   |          |         |         |   |          |          |         |   |          |          |         |   |          |          |         |   |          |          |         |
| H                                                                                                                                                                                                                     | 1.03038                                                                                                                                                                                                                                                                                                                                                                                                                                                                                                                                                                                                                                                                                                                                                                                                                                                                                                                                                                                                                                                                                                                                                                                                                                                                                                                                                                                                                                                                                                                                                                                                                                                                                                                                                                                                                                                                                                                                                                                                                                                                                                                                                                                                                                                                                                                                                                                                                                                                                                                                                                                                                                                                                                                                                                                                                                                                                                                                                                                                                                                                            | -1.28017 | -1.68055 |         |          |   |          |         |          |   |          |          |          |   |          |         |          |   |          |         |          |   |          |          |          |   |          |          |          |   |          |         |          |   |          |         |         |   |          |         |         |   |         |         |         |   |          |         |         |   |          |         |         |   |         |         |         |   |          |         |         |   |          |         |         |   |         |         |         |   |          |         |          |   |          |         |          |   |          |         |         |   |         |         |          |   |         |          |          |   |         |          |          |   |         |          |          |   |         |          |         |   |         |         |         |   |         |         |         |   |          |         |         |   |          |         |         |   |          |         |          |   |          |         |          |                                                                                                                                                                                                                       |                                                                                                                                                                                                                                                                                                                                                                                                                                                                                                                                                                                                                                                                                                                                                                                                                                                                                                                                                                                                                                                                                                                                                                                                                                                                                                                                                                                                                                                                                                                                                                                                                                                                                                                                                                                                                                                                                                                                                                                                                                                                                                                                                                                                                                                                                |         |          |          |          |         |          |          |          |          |          |          |          |          |         |          |          |          |          |         |          |          |         |          |          |          |         |          |          |          |          |         |          |          |          |         |         |          |          |         |          |          |          |                                                                                                                                                                                                                        |                                                                                                                                                                                                                                                                                                                                                                                                                                                                                                                                                                                                                                                                                                                                                                                                                                                                                                                                                                                                                                                                                                                                                                                                                                                                                                                                                                                                                                                                                                                                                                                                                                                                                                                                                                                                                                                                                                                                                                                                                                                                                                                                                                                                                                                                                                                                                                                                                                                                                                                                                                                                                                                                                                                                                                                                                                                                                                                                                                                                                                                                                      |   |          |          |          |   |          |         |          |   |          |          |          |   |          |         |          |   |          |         |          |   |          |          |          |   |          |          |          |   |         |         |          |   |          |         |          |   |          |         |          |   |          |         |          |   |          |          |         |   |          |          |         |   |         |          |         |   |          |          |         |   |         |          |         |   |         |          |          |   |          |          |          |   |          |          |          |   |          |         |          |   |         |          |          |   |         |          |          |   |         |          |          |   |         |          |          |   |         |          |          |   |         |          |          |   |         |          |          |   |         |          |          |   |         |         |          |   |         |         |          |   |         |         |          |   |         |         |          |   |         |         |          |   |          |          |         |   |          |         |         |   |          |         |         |   |          |         |         |   |          |         |         |   |          |          |         |   |          |          |         |   |          |          |         |   |          |          |         |
| H                                                                                                                                                                                                                     | 2.55241                                                                                                                                                                                                                                                                                                                                                                                                                                                                                                                                                                                                                                                                                                                                                                                                                                                                                                                                                                                                                                                                                                                                                                                                                                                                                                                                                                                                                                                                                                                                                                                                                                                                                                                                                                                                                                                                                                                                                                                                                                                                                                                                                                                                                                                                                                                                                                                                                                                                                                                                                                                                                                                                                                                                                                                                                                                                                                                                                                                                                                                                            | -2.09093 | -1.30221 |         |          |   |          |         |          |   |          |          |          |   |          |         |          |   |          |         |          |   |          |          |          |   |          |          |          |   |          |         |          |   |          |         |         |   |          |         |         |   |         |         |         |   |          |         |         |   |          |         |         |   |         |         |         |   |          |         |         |   |          |         |         |   |         |         |         |   |          |         |          |   |          |         |          |   |          |         |         |   |         |         |          |   |         |          |          |   |         |          |          |   |         |          |          |   |         |          |         |   |         |         |         |   |         |         |         |   |          |         |         |   |          |         |         |   |          |         |          |   |          |         |          |                                                                                                                                                                                                                       |                                                                                                                                                                                                                                                                                                                                                                                                                                                                                                                                                                                                                                                                                                                                                                                                                                                                                                                                                                                                                                                                                                                                                                                                                                                                                                                                                                                                                                                                                                                                                                                                                                                                                                                                                                                                                                                                                                                                                                                                                                                                                                                                                                                                                                                                                |         |          |          |          |         |          |          |          |          |          |          |          |          |         |          |          |          |          |         |          |          |         |          |          |          |         |          |          |          |          |         |          |          |          |         |         |          |          |         |          |          |          |                                                                                                                                                                                                                        |                                                                                                                                                                                                                                                                                                                                                                                                                                                                                                                                                                                                                                                                                                                                                                                                                                                                                                                                                                                                                                                                                                                                                                                                                                                                                                                                                                                                                                                                                                                                                                                                                                                                                                                                                                                                                                                                                                                                                                                                                                                                                                                                                                                                                                                                                                                                                                                                                                                                                                                                                                                                                                                                                                                                                                                                                                                                                                                                                                                                                                                                                      |   |          |          |          |   |          |         |          |   |          |          |          |   |          |         |          |   |          |         |          |   |          |          |          |   |          |          |          |   |         |         |          |   |          |         |          |   |          |         |          |   |          |         |          |   |          |          |         |   |          |          |         |   |         |          |         |   |          |          |         |   |         |          |         |   |         |          |          |   |          |          |          |   |          |          |          |   |          |         |          |   |         |          |          |   |         |          |          |   |         |          |          |   |         |          |          |   |         |          |          |   |         |          |          |   |         |          |          |   |         |          |          |   |         |         |          |   |         |         |          |   |         |         |          |   |         |         |          |   |         |         |          |   |          |          |         |   |          |         |         |   |          |         |         |   |          |         |         |   |          |         |         |   |          |          |         |   |          |          |         |   |          |          |         |   |          |          |         |
| C                                                                                                                                                                                                                     | 4.08589                                                                                                                                                                                                                                                                                                                                                                                                                                                                                                                                                                                                                                                                                                                                                                                                                                                                                                                                                                                                                                                                                                                                                                                                                                                                                                                                                                                                                                                                                                                                                                                                                                                                                                                                                                                                                                                                                                                                                                                                                                                                                                                                                                                                                                                                                                                                                                                                                                                                                                                                                                                                                                                                                                                                                                                                                                                                                                                                                                                                                                                                            | -0.32115 | -0.76457 |         |          |   |          |         |          |   |          |          |          |   |          |         |          |   |          |         |          |   |          |          |          |   |          |          |          |   |          |         |          |   |          |         |         |   |          |         |         |   |         |         |         |   |          |         |         |   |          |         |         |   |         |         |         |   |          |         |         |   |          |         |         |   |         |         |         |   |          |         |          |   |          |         |          |   |          |         |         |   |         |         |          |   |         |          |          |   |         |          |          |   |         |          |          |   |         |          |         |   |         |         |         |   |         |         |         |   |          |         |         |   |          |         |         |   |          |         |          |   |          |         |          |                                                                                                                                                                                                                       |                                                                                                                                                                                                                                                                                                                                                                                                                                                                                                                                                                                                                                                                                                                                                                                                                                                                                                                                                                                                                                                                                                                                                                                                                                                                                                                                                                                                                                                                                                                                                                                                                                                                                                                                                                                                                                                                                                                                                                                                                                                                                                                                                                                                                                                                                |         |          |          |          |         |          |          |          |          |          |          |          |          |         |          |          |          |          |         |          |          |         |          |          |          |         |          |          |          |          |         |          |          |          |         |         |          |          |         |          |          |          |                                                                                                                                                                                                                        |                                                                                                                                                                                                                                                                                                                                                                                                                                                                                                                                                                                                                                                                                                                                                                                                                                                                                                                                                                                                                                                                                                                                                                                                                                                                                                                                                                                                                                                                                                                                                                                                                                                                                                                                                                                                                                                                                                                                                                                                                                                                                                                                                                                                                                                                                                                                                                                                                                                                                                                                                                                                                                                                                                                                                                                                                                                                                                                                                                                                                                                                                      |   |          |          |          |   |          |         |          |   |          |          |          |   |          |         |          |   |          |         |          |   |          |          |          |   |          |          |          |   |         |         |          |   |          |         |          |   |          |         |          |   |          |         |          |   |          |          |         |   |          |          |         |   |         |          |         |   |          |          |         |   |         |          |         |   |         |          |          |   |          |          |          |   |          |          |          |   |          |         |          |   |         |          |          |   |         |          |          |   |         |          |          |   |         |          |          |   |         |          |          |   |         |          |          |   |         |          |          |   |         |          |          |   |         |         |          |   |         |         |          |   |         |         |          |   |         |         |          |   |         |         |          |   |          |          |         |   |          |         |         |   |          |         |         |   |          |         |         |   |          |         |         |   |          |          |         |   |          |          |         |   |          |          |         |   |          |          |         |
| H                                                                                                                                                                                                                     | 4.45598                                                                                                                                                                                                                                                                                                                                                                                                                                                                                                                                                                                                                                                                                                                                                                                                                                                                                                                                                                                                                                                                                                                                                                                                                                                                                                                                                                                                                                                                                                                                                                                                                                                                                                                                                                                                                                                                                                                                                                                                                                                                                                                                                                                                                                                                                                                                                                                                                                                                                                                                                                                                                                                                                                                                                                                                                                                                                                                                                                                                                                                                            | -0.41953 | -1.78266 |         |          |   |          |         |          |   |          |          |          |   |          |         |          |   |          |         |          |   |          |          |          |   |          |          |          |   |          |         |          |   |          |         |         |   |          |         |         |   |         |         |         |   |          |         |         |   |          |         |         |   |         |         |         |   |          |         |         |   |          |         |         |   |         |         |         |   |          |         |          |   |          |         |          |   |          |         |         |   |         |         |          |   |         |          |          |   |         |          |          |   |         |          |          |   |         |          |         |   |         |         |         |   |         |         |         |   |          |         |         |   |          |         |         |   |          |         |          |   |          |         |          |                                                                                                                                                                                                                       |                                                                                                                                                                                                                                                                                                                                                                                                                                                                                                                                                                                                                                                                                                                                                                                                                                                                                                                                                                                                                                                                                                                                                                                                                                                                                                                                                                                                                                                                                                                                                                                                                                                                                                                                                                                                                                                                                                                                                                                                                                                                                                                                                                                                                                                                                |         |          |          |          |         |          |          |          |          |          |          |          |          |         |          |          |          |          |         |          |          |         |          |          |          |         |          |          |          |          |         |          |          |          |         |         |          |          |         |          |          |          |                                                                                                                                                                                                                        |                                                                                                                                                                                                                                                                                                                                                                                                                                                                                                                                                                                                                                                                                                                                                                                                                                                                                                                                                                                                                                                                                                                                                                                                                                                                                                                                                                                                                                                                                                                                                                                                                                                                                                                                                                                                                                                                                                                                                                                                                                                                                                                                                                                                                                                                                                                                                                                                                                                                                                                                                                                                                                                                                                                                                                                                                                                                                                                                                                                                                                                                                      |   |          |          |          |   |          |         |          |   |          |          |          |   |          |         |          |   |          |         |          |   |          |          |          |   |          |          |          |   |         |         |          |   |          |         |          |   |          |         |          |   |          |         |          |   |          |          |         |   |          |          |         |   |         |          |         |   |          |          |         |   |         |          |         |   |         |          |          |   |          |          |          |   |          |          |          |   |          |         |          |   |         |          |          |   |         |          |          |   |         |          |          |   |         |          |          |   |         |          |          |   |         |          |          |   |         |          |          |   |         |          |          |   |         |         |          |   |         |         |          |   |         |         |          |   |         |         |          |   |         |         |          |   |          |          |         |   |          |         |         |   |          |         |         |   |          |         |         |   |          |         |         |   |          |          |         |   |          |          |         |   |          |          |         |   |          |          |         |
| H                                                                                                                                                                                                                     | 4.22491                                                                                                                                                                                                                                                                                                                                                                                                                                                                                                                                                                                                                                                                                                                                                                                                                                                                                                                                                                                                                                                                                                                                                                                                                                                                                                                                                                                                                                                                                                                                                                                                                                                                                                                                                                                                                                                                                                                                                                                                                                                                                                                                                                                                                                                                                                                                                                                                                                                                                                                                                                                                                                                                                                                                                                                                                                                                                                                                                                                                                                                                            | -1.24987 | -0.22123 |         |          |   |          |         |          |   |          |          |          |   |          |         |          |   |          |         |          |   |          |          |          |   |          |          |          |   |          |         |          |   |          |         |         |   |          |         |         |   |         |         |         |   |          |         |         |   |          |         |         |   |         |         |         |   |          |         |         |   |          |         |         |   |         |         |         |   |          |         |          |   |          |         |          |   |          |         |         |   |         |         |          |   |         |          |          |   |         |          |          |   |         |          |          |   |         |          |         |   |         |         |         |   |         |         |         |   |          |         |         |   |          |         |         |   |          |         |          |   |          |         |          |                                                                                                                                                                                                                       |                                                                                                                                                                                                                                                                                                                                                                                                                                                                                                                                                                                                                                                                                                                                                                                                                                                                                                                                                                                                                                                                                                                                                                                                                                                                                                                                                                                                                                                                                                                                                                                                                                                                                                                                                                                                                                                                                                                                                                                                                                                                                                                                                                                                                                                                                |         |          |          |          |         |          |          |          |          |          |          |          |          |         |          |          |          |          |         |          |          |         |          |          |          |         |          |          |          |          |         |          |          |          |         |         |          |          |         |          |          |          |                                                                                                                                                                                                                        |                                                                                                                                                                                                                                                                                                                                                                                                                                                                                                                                                                                                                                                                                                                                                                                                                                                                                                                                                                                                                                                                                                                                                                                                                                                                                                                                                                                                                                                                                                                                                                                                                                                                                                                                                                                                                                                                                                                                                                                                                                                                                                                                                                                                                                                                                                                                                                                                                                                                                                                                                                                                                                                                                                                                                                                                                                                                                                                                                                                                                                                                                      |   |          |          |          |   |          |         |          |   |          |          |          |   |          |         |          |   |          |         |          |   |          |          |          |   |          |          |          |   |         |         |          |   |          |         |          |   |          |         |          |   |          |         |          |   |          |          |         |   |          |          |         |   |         |          |         |   |          |          |         |   |         |          |         |   |         |          |          |   |          |          |          |   |          |          |          |   |          |         |          |   |         |          |          |   |         |          |          |   |         |          |          |   |         |          |          |   |         |          |          |   |         |          |          |   |         |          |          |   |         |          |          |   |         |         |          |   |         |         |          |   |         |         |          |   |         |         |          |   |         |         |          |   |          |          |         |   |          |         |         |   |          |         |         |   |          |         |         |   |          |         |         |   |          |          |         |   |          |          |         |   |          |          |         |   |          |          |         |
| H                                                                                                                                                                                                                     | 4.60213                                                                                                                                                                                                                                                                                                                                                                                                                                                                                                                                                                                                                                                                                                                                                                                                                                                                                                                                                                                                                                                                                                                                                                                                                                                                                                                                                                                                                                                                                                                                                                                                                                                                                                                                                                                                                                                                                                                                                                                                                                                                                                                                                                                                                                                                                                                                                                                                                                                                                                                                                                                                                                                                                                                                                                                                                                                                                                                                                                                                                                                                            | 0.49654  | -0.27492 |         |          |   |          |         |          |   |          |          |          |   |          |         |          |   |          |         |          |   |          |          |          |   |          |          |          |   |          |         |          |   |          |         |         |   |          |         |         |   |         |         |         |   |          |         |         |   |          |         |         |   |         |         |         |   |          |         |         |   |          |         |         |   |         |         |         |   |          |         |          |   |          |         |          |   |          |         |         |   |         |         |          |   |         |          |          |   |         |          |          |   |         |          |          |   |         |          |         |   |         |         |         |   |         |         |         |   |          |         |         |   |          |         |         |   |          |         |          |   |          |         |          |                                                                                                                                                                                                                       |                                                                                                                                                                                                                                                                                                                                                                                                                                                                                                                                                                                                                                                                                                                                                                                                                                                                                                                                                                                                                                                                                                                                                                                                                                                                                                                                                                                                                                                                                                                                                                                                                                                                                                                                                                                                                                                                                                                                                                                                                                                                                                                                                                                                                                                                                |         |          |          |          |         |          |          |          |          |          |          |          |          |         |          |          |          |          |         |          |          |         |          |          |          |         |          |          |          |          |         |          |          |          |         |         |          |          |         |          |          |          |                                                                                                                                                                                                                        |                                                                                                                                                                                                                                                                                                                                                                                                                                                                                                                                                                                                                                                                                                                                                                                                                                                                                                                                                                                                                                                                                                                                                                                                                                                                                                                                                                                                                                                                                                                                                                                                                                                                                                                                                                                                                                                                                                                                                                                                                                                                                                                                                                                                                                                                                                                                                                                                                                                                                                                                                                                                                                                                                                                                                                                                                                                                                                                                                                                                                                                                                      |   |          |          |          |   |          |         |          |   |          |          |          |   |          |         |          |   |          |         |          |   |          |          |          |   |          |          |          |   |         |         |          |   |          |         |          |   |          |         |          |   |          |         |          |   |          |          |         |   |          |          |         |   |         |          |         |   |          |          |         |   |         |          |         |   |         |          |          |   |          |          |          |   |          |          |          |   |          |         |          |   |         |          |          |   |         |          |          |   |         |          |          |   |         |          |          |   |         |          |          |   |         |          |          |   |         |          |          |   |         |          |          |   |         |         |          |   |         |         |          |   |         |         |          |   |         |         |          |   |         |         |          |   |          |          |         |   |          |         |         |   |          |         |         |   |          |         |         |   |          |         |         |   |          |          |         |   |          |          |         |   |          |          |         |   |          |          |         |
| C                                                                                                                                                                                                                     | 2.55341                                                                                                                                                                                                                                                                                                                                                                                                                                                                                                                                                                                                                                                                                                                                                                                                                                                                                                                                                                                                                                                                                                                                                                                                                                                                                                                                                                                                                                                                                                                                                                                                                                                                                                                                                                                                                                                                                                                                                                                                                                                                                                                                                                                                                                                                                                                                                                                                                                                                                                                                                                                                                                                                                                                                                                                                                                                                                                                                                                                                                                                                            | 1.34907  | -1.54264 |         |          |   |          |         |          |   |          |          |          |   |          |         |          |   |          |         |          |   |          |          |          |   |          |          |          |   |          |         |          |   |          |         |         |   |          |         |         |   |         |         |         |   |          |         |         |   |          |         |         |   |         |         |         |   |          |         |         |   |          |         |         |   |         |         |         |   |          |         |          |   |          |         |          |   |          |         |         |   |         |         |          |   |         |          |          |   |         |          |          |   |         |          |          |   |         |          |         |   |         |         |         |   |         |         |         |   |          |         |         |   |          |         |         |   |          |         |          |   |          |         |          |                                                                                                                                                                                                                       |                                                                                                                                                                                                                                                                                                                                                                                                                                                                                                                                                                                                                                                                                                                                                                                                                                                                                                                                                                                                                                                                                                                                                                                                                                                                                                                                                                                                                                                                                                                                                                                                                                                                                                                                                                                                                                                                                                                                                                                                                                                                                                                                                                                                                                                                                |         |          |          |          |         |          |          |          |          |          |          |          |          |         |          |          |          |          |         |          |          |         |          |          |          |         |          |          |          |          |         |          |          |          |         |         |          |          |         |          |          |          |                                                                                                                                                                                                                        |                                                                                                                                                                                                                                                                                                                                                                                                                                                                                                                                                                                                                                                                                                                                                                                                                                                                                                                                                                                                                                                                                                                                                                                                                                                                                                                                                                                                                                                                                                                                                                                                                                                                                                                                                                                                                                                                                                                                                                                                                                                                                                                                                                                                                                                                                                                                                                                                                                                                                                                                                                                                                                                                                                                                                                                                                                                                                                                                                                                                                                                                                      |   |          |          |          |   |          |         |          |   |          |          |          |   |          |         |          |   |          |         |          |   |          |          |          |   |          |          |          |   |         |         |          |   |          |         |          |   |          |         |          |   |          |         |          |   |          |          |         |   |          |          |         |   |         |          |         |   |          |          |         |   |         |          |         |   |         |          |          |   |          |          |          |   |          |          |          |   |          |         |          |   |         |          |          |   |         |          |          |   |         |          |          |   |         |          |          |   |         |          |          |   |         |          |          |   |         |          |          |   |         |          |          |   |         |         |          |   |         |         |          |   |         |         |          |   |         |         |          |   |         |         |          |   |          |          |         |   |          |         |         |   |          |         |         |   |          |         |         |   |          |         |         |   |          |          |         |   |          |          |         |   |          |          |         |   |          |          |         |
| H                                                                                                                                                                                                                     | 2.72240                                                                                                                                                                                                                                                                                                                                                                                                                                                                                                                                                                                                                                                                                                                                                                                                                                                                                                                                                                                                                                                                                                                                                                                                                                                                                                                                                                                                                                                                                                                                                                                                                                                                                                                                                                                                                                                                                                                                                                                                                                                                                                                                                                                                                                                                                                                                                                                                                                                                                                                                                                                                                                                                                                                                                                                                                                                                                                                                                                                                                                                                            | 1.23447  | -2.61134 |         |          |   |          |         |          |   |          |          |          |   |          |         |          |   |          |         |          |   |          |          |          |   |          |          |          |   |          |         |          |   |          |         |         |   |          |         |         |   |         |         |         |   |          |         |         |   |          |         |         |   |         |         |         |   |          |         |         |   |          |         |         |   |         |         |         |   |          |         |          |   |          |         |          |   |          |         |         |   |         |         |          |   |         |          |          |   |         |          |          |   |         |          |          |   |         |          |         |   |         |         |         |   |         |         |         |   |          |         |         |   |          |         |         |   |          |         |          |   |          |         |          |                                                                                                                                                                                                                       |                                                                                                                                                                                                                                                                                                                                                                                                                                                                                                                                                                                                                                                                                                                                                                                                                                                                                                                                                                                                                                                                                                                                                                                                                                                                                                                                                                                                                                                                                                                                                                                                                                                                                                                                                                                                                                                                                                                                                                                                                                                                                                                                                                                                                                                                                |         |          |          |          |         |          |          |          |          |          |          |          |          |         |          |          |          |          |         |          |          |         |          |          |          |         |          |          |          |          |         |          |          |          |         |         |          |          |         |          |          |          |                                                                                                                                                                                                                        |                                                                                                                                                                                                                                                                                                                                                                                                                                                                                                                                                                                                                                                                                                                                                                                                                                                                                                                                                                                                                                                                                                                                                                                                                                                                                                                                                                                                                                                                                                                                                                                                                                                                                                                                                                                                                                                                                                                                                                                                                                                                                                                                                                                                                                                                                                                                                                                                                                                                                                                                                                                                                                                                                                                                                                                                                                                                                                                                                                                                                                                                                      |   |          |          |          |   |          |         |          |   |          |          |          |   |          |         |          |   |          |         |          |   |          |          |          |   |          |          |          |   |         |         |          |   |          |         |          |   |          |         |          |   |          |         |          |   |          |          |         |   |          |          |         |   |         |          |         |   |          |          |         |   |         |          |         |   |         |          |          |   |          |          |          |   |          |          |          |   |          |         |          |   |         |          |          |   |         |          |          |   |         |          |          |   |         |          |          |   |         |          |          |   |         |          |          |   |         |          |          |   |         |          |          |   |         |         |          |   |         |         |          |   |         |         |          |   |         |         |          |   |         |         |          |   |          |          |         |   |          |         |         |   |          |         |         |   |          |         |         |   |          |         |         |   |          |          |         |   |          |          |         |   |          |          |         |   |          |          |         |
| H                                                                                                                                                                                                                     | 3.34311                                                                                                                                                                                                                                                                                                                                                                                                                                                                                                                                                                                                                                                                                                                                                                                                                                                                                                                                                                                                                                                                                                                                                                                                                                                                                                                                                                                                                                                                                                                                                                                                                                                                                                                                                                                                                                                                                                                                                                                                                                                                                                                                                                                                                                                                                                                                                                                                                                                                                                                                                                                                                                                                                                                                                                                                                                                                                                                                                                                                                                                                            | 1.94822  | -1.09832 |         |          |   |          |         |          |   |          |          |          |   |          |         |          |   |          |         |          |   |          |          |          |   |          |          |          |   |          |         |          |   |          |         |         |   |          |         |         |   |         |         |         |   |          |         |         |   |          |         |         |   |         |         |         |   |          |         |         |   |          |         |         |   |         |         |         |   |          |         |          |   |          |         |          |   |          |         |         |   |         |         |          |   |         |          |          |   |         |          |          |   |         |          |          |   |         |          |         |   |         |         |         |   |         |         |         |   |          |         |         |   |          |         |         |   |          |         |          |   |          |         |          |                                                                                                                                                                                                                       |                                                                                                                                                                                                                                                                                                                                                                                                                                                                                                                                                                                                                                                                                                                                                                                                                                                                                                                                                                                                                                                                                                                                                                                                                                                                                                                                                                                                                                                                                                                                                                                                                                                                                                                                                                                                                                                                                                                                                                                                                                                                                                                                                                                                                                                                                |         |          |          |          |         |          |          |          |          |          |          |          |          |         |          |          |          |          |         |          |          |         |          |          |          |         |          |          |          |          |         |          |          |          |         |         |          |          |         |          |          |          |                                                                                                                                                                                                                        |                                                                                                                                                                                                                                                                                                                                                                                                                                                                                                                                                                                                                                                                                                                                                                                                                                                                                                                                                                                                                                                                                                                                                                                                                                                                                                                                                                                                                                                                                                                                                                                                                                                                                                                                                                                                                                                                                                                                                                                                                                                                                                                                                                                                                                                                                                                                                                                                                                                                                                                                                                                                                                                                                                                                                                                                                                                                                                                                                                                                                                                                                      |   |          |          |          |   |          |         |          |   |          |          |          |   |          |         |          |   |          |         |          |   |          |          |          |   |          |          |          |   |         |         |          |   |          |         |          |   |          |         |          |   |          |         |          |   |          |          |         |   |          |          |         |   |         |          |         |   |          |          |         |   |         |          |         |   |         |          |          |   |          |          |          |   |          |          |          |   |          |         |          |   |         |          |          |   |         |          |          |   |         |          |          |   |         |          |          |   |         |          |          |   |         |          |          |   |         |          |          |   |         |          |          |   |         |         |          |   |         |         |          |   |         |         |          |   |         |         |          |   |         |         |          |   |          |          |         |   |          |         |         |   |          |         |         |   |          |         |         |   |          |         |         |   |          |          |         |   |          |          |         |   |          |          |         |   |          |          |         |
| H                                                                                                                                                                                                                     | 1.60894                                                                                                                                                                                                                                                                                                                                                                                                                                                                                                                                                                                                                                                                                                                                                                                                                                                                                                                                                                                                                                                                                                                                                                                                                                                                                                                                                                                                                                                                                                                                                                                                                                                                                                                                                                                                                                                                                                                                                                                                                                                                                                                                                                                                                                                                                                                                                                                                                                                                                                                                                                                                                                                                                                                                                                                                                                                                                                                                                                                                                                                                            | 1.83491  | -1.34310 |         |          |   |          |         |          |   |          |          |          |   |          |         |          |   |          |         |          |   |          |          |          |   |          |          |          |   |          |         |          |   |          |         |         |   |          |         |         |   |         |         |         |   |          |         |         |   |          |         |         |   |         |         |         |   |          |         |         |   |          |         |         |   |         |         |         |   |          |         |          |   |          |         |          |   |          |         |         |   |         |         |          |   |         |          |          |   |         |          |          |   |         |          |          |   |         |          |         |   |         |         |         |   |         |         |         |   |          |         |         |   |          |         |         |   |          |         |          |   |          |         |          |                                                                                                                                                                                                                       |                                                                                                                                                                                                                                                                                                                                                                                                                                                                                                                                                                                                                                                                                                                                                                                                                                                                                                                                                                                                                                                                                                                                                                                                                                                                                                                                                                                                                                                                                                                                                                                                                                                                                                                                                                                                                                                                                                                                                                                                                                                                                                                                                                                                                                                                                |         |          |          |          |         |          |          |          |          |          |          |          |          |         |          |          |          |          |         |          |          |         |          |          |          |         |          |          |          |          |         |          |          |          |         |         |          |          |         |          |          |          |                                                                                                                                                                                                                        |                                                                                                                                                                                                                                                                                                                                                                                                                                                                                                                                                                                                                                                                                                                                                                                                                                                                                                                                                                                                                                                                                                                                                                                                                                                                                                                                                                                                                                                                                                                                                                                                                                                                                                                                                                                                                                                                                                                                                                                                                                                                                                                                                                                                                                                                                                                                                                                                                                                                                                                                                                                                                                                                                                                                                                                                                                                                                                                                                                                                                                                                                      |   |          |          |          |   |          |         |          |   |          |          |          |   |          |         |          |   |          |         |          |   |          |          |          |   |          |          |          |   |         |         |          |   |          |         |          |   |          |         |          |   |          |         |          |   |          |          |         |   |          |          |         |   |         |          |         |   |          |          |         |   |         |          |         |   |         |          |          |   |          |          |          |   |          |          |          |   |          |         |          |   |         |          |          |   |         |          |          |   |         |          |          |   |         |          |          |   |         |          |          |   |         |          |          |   |         |          |          |   |         |          |          |   |         |         |          |   |         |         |          |   |         |         |          |   |         |         |          |   |         |         |          |   |          |          |         |   |          |         |         |   |          |         |         |   |          |         |         |   |          |         |         |   |          |          |         |   |          |          |         |   |          |          |         |   |          |          |         |
| N                                                                                                                                                                                                                     | -2.66432                                                                                                                                                                                                                                                                                                                                                                                                                                                                                                                                                                                                                                                                                                                                                                                                                                                                                                                                                                                                                                                                                                                                                                                                                                                                                                                                                                                                                                                                                                                                                                                                                                                                                                                                                                                                                                                                                                                                                                                                                                                                                                                                                                                                                                                                                                                                                                                                                                                                                                                                                                                                                                                                                                                                                                                                                                                                                                                                                                                                                                                                           | -0.11239 | 1.09615  |         |          |   |          |         |          |   |          |          |          |   |          |         |          |   |          |         |          |   |          |          |          |   |          |          |          |   |          |         |          |   |          |         |         |   |          |         |         |   |         |         |         |   |          |         |         |   |          |         |         |   |         |         |         |   |          |         |         |   |          |         |         |   |         |         |         |   |          |         |          |   |          |         |          |   |          |         |         |   |         |         |          |   |         |          |          |   |         |          |          |   |         |          |          |   |         |          |         |   |         |         |         |   |         |         |         |   |          |         |         |   |          |         |         |   |          |         |          |   |          |         |          |                                                                                                                                                                                                                       |                                                                                                                                                                                                                                                                                                                                                                                                                                                                                                                                                                                                                                                                                                                                                                                                                                                                                                                                                                                                                                                                                                                                                                                                                                                                                                                                                                                                                                                                                                                                                                                                                                                                                                                                                                                                                                                                                                                                                                                                                                                                                                                                                                                                                                                                                |         |          |          |          |         |          |          |          |          |          |          |          |          |         |          |          |          |          |         |          |          |         |          |          |          |         |          |          |          |          |         |          |          |          |         |         |          |          |         |          |          |          |                                                                                                                                                                                                                        |                                                                                                                                                                                                                                                                                                                                                                                                                                                                                                                                                                                                                                                                                                                                                                                                                                                                                                                                                                                                                                                                                                                                                                                                                                                                                                                                                                                                                                                                                                                                                                                                                                                                                                                                                                                                                                                                                                                                                                                                                                                                                                                                                                                                                                                                                                                                                                                                                                                                                                                                                                                                                                                                                                                                                                                                                                                                                                                                                                                                                                                                                      |   |          |          |          |   |          |         |          |   |          |          |          |   |          |         |          |   |          |         |          |   |          |          |          |   |          |          |          |   |         |         |          |   |          |         |          |   |          |         |          |   |          |         |          |   |          |          |         |   |          |          |         |   |         |          |         |   |          |          |         |   |         |          |         |   |         |          |          |   |          |          |          |   |          |          |          |   |          |         |          |   |         |          |          |   |         |          |          |   |         |          |          |   |         |          |          |   |         |          |          |   |         |          |          |   |         |          |          |   |         |          |          |   |         |         |          |   |         |         |          |   |         |         |          |   |         |         |          |   |         |         |          |   |          |          |         |   |          |         |         |   |          |         |         |   |          |         |         |   |          |         |         |   |          |          |         |   |          |          |         |   |          |          |         |   |          |          |         |
| C                                                                                                                                                                                                                     | -2.81865                                                                                                                                                                                                                                                                                                                                                                                                                                                                                                                                                                                                                                                                                                                                                                                                                                                                                                                                                                                                                                                                                                                                                                                                                                                                                                                                                                                                                                                                                                                                                                                                                                                                                                                                                                                                                                                                                                                                                                                                                                                                                                                                                                                                                                                                                                                                                                                                                                                                                                                                                                                                                                                                                                                                                                                                                                                                                                                                                                                                                                                                           | 1.24069  | 1.64107  |         |          |   |          |         |          |   |          |          |          |   |          |         |          |   |          |         |          |   |          |          |          |   |          |          |          |   |          |         |          |   |          |         |         |   |          |         |         |   |         |         |         |   |          |         |         |   |          |         |         |   |         |         |         |   |          |         |         |   |          |         |         |   |         |         |         |   |          |         |          |   |          |         |          |   |          |         |         |   |         |         |          |   |         |          |          |   |         |          |          |   |         |          |          |   |         |          |         |   |         |         |         |   |         |         |         |   |          |         |         |   |          |         |         |   |          |         |          |   |          |         |          |                                                                                                                                                                                                                       |                                                                                                                                                                                                                                                                                                                                                                                                                                                                                                                                                                                                                                                                                                                                                                                                                                                                                                                                                                                                                                                                                                                                                                                                                                                                                                                                                                                                                                                                                                                                                                                                                                                                                                                                                                                                                                                                                                                                                                                                                                                                                                                                                                                                                                                                                |         |          |          |          |         |          |          |          |          |          |          |          |          |         |          |          |          |          |         |          |          |         |          |          |          |         |          |          |          |          |         |          |          |          |         |         |          |          |         |          |          |          |                                                                                                                                                                                                                        |                                                                                                                                                                                                                                                                                                                                                                                                                                                                                                                                                                                                                                                                                                                                                                                                                                                                                                                                                                                                                                                                                                                                                                                                                                                                                                                                                                                                                                                                                                                                                                                                                                                                                                                                                                                                                                                                                                                                                                                                                                                                                                                                                                                                                                                                                                                                                                                                                                                                                                                                                                                                                                                                                                                                                                                                                                                                                                                                                                                                                                                                                      |   |          |          |          |   |          |         |          |   |          |          |          |   |          |         |          |   |          |         |          |   |          |          |          |   |          |          |          |   |         |         |          |   |          |         |          |   |          |         |          |   |          |         |          |   |          |          |         |   |          |          |         |   |         |          |         |   |          |          |         |   |         |          |         |   |         |          |          |   |          |          |          |   |          |          |          |   |          |         |          |   |         |          |          |   |         |          |          |   |         |          |          |   |         |          |          |   |         |          |          |   |         |          |          |   |         |          |          |   |         |          |          |   |         |         |          |   |         |         |          |   |         |         |          |   |         |         |          |   |         |         |          |   |          |          |         |   |          |         |         |   |          |         |         |   |          |         |         |   |          |         |         |   |          |          |         |   |          |          |         |   |          |          |         |   |          |          |         |
| H                                                                                                                                                                                                                     | -3.62248                                                                                                                                                                                                                                                                                                                                                                                                                                                                                                                                                                                                                                                                                                                                                                                                                                                                                                                                                                                                                                                                                                                                                                                                                                                                                                                                                                                                                                                                                                                                                                                                                                                                                                                                                                                                                                                                                                                                                                                                                                                                                                                                                                                                                                                                                                                                                                                                                                                                                                                                                                                                                                                                                                                                                                                                                                                                                                                                                                                                                                                                           | 1.78409  | 1.12750  |         |          |   |          |         |          |   |          |          |          |   |          |         |          |   |          |         |          |   |          |          |          |   |          |          |          |   |          |         |          |   |          |         |         |   |          |         |         |   |         |         |         |   |          |         |         |   |          |         |         |   |         |         |         |   |          |         |         |   |          |         |         |   |         |         |         |   |          |         |          |   |          |         |          |   |          |         |         |   |         |         |          |   |         |          |          |   |         |          |          |   |         |          |          |   |         |          |         |   |         |         |         |   |         |         |         |   |          |         |         |   |          |         |         |   |          |         |          |   |          |         |          |                                                                                                                                                                                                                       |                                                                                                                                                                                                                                                                                                                                                                                                                                                                                                                                                                                                                                                                                                                                                                                                                                                                                                                                                                                                                                                                                                                                                                                                                                                                                                                                                                                                                                                                                                                                                                                                                                                                                                                                                                                                                                                                                                                                                                                                                                                                                                                                                                                                                                                                                |         |          |          |          |         |          |          |          |          |          |          |          |          |         |          |          |          |          |         |          |          |         |          |          |          |         |          |          |          |          |         |          |          |          |         |         |          |          |         |          |          |          |                                                                                                                                                                                                                        |                                                                                                                                                                                                                                                                                                                                                                                                                                                                                                                                                                                                                                                                                                                                                                                                                                                                                                                                                                                                                                                                                                                                                                                                                                                                                                                                                                                                                                                                                                                                                                                                                                                                                                                                                                                                                                                                                                                                                                                                                                                                                                                                                                                                                                                                                                                                                                                                                                                                                                                                                                                                                                                                                                                                                                                                                                                                                                                                                                                                                                                                                      |   |          |          |          |   |          |         |          |   |          |          |          |   |          |         |          |   |          |         |          |   |          |          |          |   |          |          |          |   |         |         |          |   |          |         |          |   |          |         |          |   |          |         |          |   |          |          |         |   |          |          |         |   |         |          |         |   |          |          |         |   |         |          |         |   |         |          |          |   |          |          |          |   |          |          |          |   |          |         |          |   |         |          |          |   |         |          |          |   |         |          |          |   |         |          |          |   |         |          |          |   |         |          |          |   |         |          |          |   |         |          |          |   |         |         |          |   |         |         |          |   |         |         |          |   |         |         |          |   |         |         |          |   |          |          |         |   |          |         |         |   |          |         |         |   |          |         |         |   |          |         |         |   |          |          |         |   |          |          |         |   |          |          |         |   |          |          |         |
| H                                                                                                                                                                                                                     | -1.89107                                                                                                                                                                                                                                                                                                                                                                                                                                                                                                                                                                                                                                                                                                                                                                                                                                                                                                                                                                                                                                                                                                                                                                                                                                                                                                                                                                                                                                                                                                                                                                                                                                                                                                                                                                                                                                                                                                                                                                                                                                                                                                                                                                                                                                                                                                                                                                                                                                                                                                                                                                                                                                                                                                                                                                                                                                                                                                                                                                                                                                                                           | 1.80081  | 1.52923  |         |          |   |          |         |          |   |          |          |          |   |          |         |          |   |          |         |          |   |          |          |          |   |          |          |          |   |          |         |          |   |          |         |         |   |          |         |         |   |         |         |         |   |          |         |         |   |          |         |         |   |         |         |         |   |          |         |         |   |          |         |         |   |         |         |         |   |          |         |          |   |          |         |          |   |          |         |         |   |         |         |          |   |         |          |          |   |         |          |          |   |         |          |          |   |         |          |         |   |         |         |         |   |         |         |         |   |          |         |         |   |          |         |         |   |          |         |          |   |          |         |          |                                                                                                                                                                                                                       |                                                                                                                                                                                                                                                                                                                                                                                                                                                                                                                                                                                                                                                                                                                                                                                                                                                                                                                                                                                                                                                                                                                                                                                                                                                                                                                                                                                                                                                                                                                                                                                                                                                                                                                                                                                                                                                                                                                                                                                                                                                                                                                                                                                                                                                                                |         |          |          |          |         |          |          |          |          |          |          |          |          |         |          |          |          |          |         |          |          |         |          |          |          |         |          |          |          |          |         |          |          |          |         |         |          |          |         |          |          |          |                                                                                                                                                                                                                        |                                                                                                                                                                                                                                                                                                                                                                                                                                                                                                                                                                                                                                                                                                                                                                                                                                                                                                                                                                                                                                                                                                                                                                                                                                                                                                                                                                                                                                                                                                                                                                                                                                                                                                                                                                                                                                                                                                                                                                                                                                                                                                                                                                                                                                                                                                                                                                                                                                                                                                                                                                                                                                                                                                                                                                                                                                                                                                                                                                                                                                                                                      |   |          |          |          |   |          |         |          |   |          |          |          |   |          |         |          |   |          |         |          |   |          |          |          |   |          |          |          |   |         |         |          |   |          |         |          |   |          |         |          |   |          |         |          |   |          |          |         |   |          |          |         |   |         |          |         |   |          |          |         |   |         |          |         |   |         |          |          |   |          |          |          |   |          |          |          |   |          |         |          |   |         |          |          |   |         |          |          |   |         |          |          |   |         |          |          |   |         |          |          |   |         |          |          |   |         |          |          |   |         |          |          |   |         |         |          |   |         |         |          |   |         |         |          |   |         |         |          |   |         |         |          |   |          |          |         |   |          |         |         |   |          |         |         |   |          |         |         |   |          |         |         |   |          |          |         |   |          |          |         |   |          |          |         |   |          |          |         |
| H                                                                                                                                                                                                                     | -3.06031                                                                                                                                                                                                                                                                                                                                                                                                                                                                                                                                                                                                                                                                                                                                                                                                                                                                                                                                                                                                                                                                                                                                                                                                                                                                                                                                                                                                                                                                                                                                                                                                                                                                                                                                                                                                                                                                                                                                                                                                                                                                                                                                                                                                                                                                                                                                                                                                                                                                                                                                                                                                                                                                                                                                                                                                                                                                                                                                                                                                                                                                           | 1.17437  | 2.70337  |         |          |   |          |         |          |   |          |          |          |   |          |         |          |   |          |         |          |   |          |          |          |   |          |          |          |   |          |         |          |   |          |         |         |   |          |         |         |   |         |         |         |   |          |         |         |   |          |         |         |   |         |         |         |   |          |         |         |   |          |         |         |   |         |         |         |   |          |         |          |   |          |         |          |   |          |         |         |   |         |         |          |   |         |          |          |   |         |          |          |   |         |          |          |   |         |          |         |   |         |         |         |   |         |         |         |   |          |         |         |   |          |         |         |   |          |         |          |   |          |         |          |                                                                                                                                                                                                                       |                                                                                                                                                                                                                                                                                                                                                                                                                                                                                                                                                                                                                                                                                                                                                                                                                                                                                                                                                                                                                                                                                                                                                                                                                                                                                                                                                                                                                                                                                                                                                                                                                                                                                                                                                                                                                                                                                                                                                                                                                                                                                                                                                                                                                                                                                |         |          |          |          |         |          |          |          |          |          |          |          |          |         |          |          |          |          |         |          |          |         |          |          |          |         |          |          |          |          |         |          |          |          |         |         |          |          |         |          |          |          |                                                                                                                                                                                                                        |                                                                                                                                                                                                                                                                                                                                                                                                                                                                                                                                                                                                                                                                                                                                                                                                                                                                                                                                                                                                                                                                                                                                                                                                                                                                                                                                                                                                                                                                                                                                                                                                                                                                                                                                                                                                                                                                                                                                                                                                                                                                                                                                                                                                                                                                                                                                                                                                                                                                                                                                                                                                                                                                                                                                                                                                                                                                                                                                                                                                                                                                                      |   |          |          |          |   |          |         |          |   |          |          |          |   |          |         |          |   |          |         |          |   |          |          |          |   |          |          |          |   |         |         |          |   |          |         |          |   |          |         |          |   |          |         |          |   |          |          |         |   |          |          |         |   |         |          |         |   |          |          |         |   |         |          |         |   |         |          |          |   |          |          |          |   |          |          |          |   |          |         |          |   |         |          |          |   |         |          |          |   |         |          |          |   |         |          |          |   |         |          |          |   |         |          |          |   |         |          |          |   |         |          |          |   |         |         |          |   |         |         |          |   |         |         |          |   |         |         |          |   |         |         |          |   |          |          |         |   |          |         |         |   |          |         |         |   |          |         |         |   |          |         |         |   |          |          |         |   |          |          |         |   |          |          |         |   |          |          |         |
| C                                                                                                                                                                                                                     | -3.85169                                                                                                                                                                                                                                                                                                                                                                                                                                                                                                                                                                                                                                                                                                                                                                                                                                                                                                                                                                                                                                                                                                                                                                                                                                                                                                                                                                                                                                                                                                                                                                                                                                                                                                                                                                                                                                                                                                                                                                                                                                                                                                                                                                                                                                                                                                                                                                                                                                                                                                                                                                                                                                                                                                                                                                                                                                                                                                                                                                                                                                                                           | -0.92273 | 1.33750  |         |          |   |          |         |          |   |          |          |          |   |          |         |          |   |          |         |          |   |          |          |          |   |          |          |          |   |          |         |          |   |          |         |         |   |          |         |         |   |         |         |         |   |          |         |         |   |          |         |         |   |         |         |         |   |          |         |         |   |          |         |         |   |         |         |         |   |          |         |          |   |          |         |          |   |          |         |         |   |         |         |          |   |         |          |          |   |         |          |          |   |         |          |          |   |         |          |         |   |         |         |         |   |         |         |         |   |          |         |         |   |          |         |         |   |          |         |          |   |          |         |          |                                                                                                                                                                                                                       |                                                                                                                                                                                                                                                                                                                                                                                                                                                                                                                                                                                                                                                                                                                                                                                                                                                                                                                                                                                                                                                                                                                                                                                                                                                                                                                                                                                                                                                                                                                                                                                                                                                                                                                                                                                                                                                                                                                                                                                                                                                                                                                                                                                                                                                                                |         |          |          |          |         |          |          |          |          |          |          |          |          |         |          |          |          |          |         |          |          |         |          |          |          |         |          |          |          |          |         |          |          |          |         |         |          |          |         |          |          |          |                                                                                                                                                                                                                        |                                                                                                                                                                                                                                                                                                                                                                                                                                                                                                                                                                                                                                                                                                                                                                                                                                                                                                                                                                                                                                                                                                                                                                                                                                                                                                                                                                                                                                                                                                                                                                                                                                                                                                                                                                                                                                                                                                                                                                                                                                                                                                                                                                                                                                                                                                                                                                                                                                                                                                                                                                                                                                                                                                                                                                                                                                                                                                                                                                                                                                                                                      |   |          |          |          |   |          |         |          |   |          |          |          |   |          |         |          |   |          |         |          |   |          |          |          |   |          |          |          |   |         |         |          |   |          |         |          |   |          |         |          |   |          |         |          |   |          |          |         |   |          |          |         |   |         |          |         |   |          |          |         |   |         |          |         |   |         |          |          |   |          |          |          |   |          |          |          |   |          |         |          |   |         |          |          |   |         |          |          |   |         |          |          |   |         |          |          |   |         |          |          |   |         |          |          |   |         |          |          |   |         |          |          |   |         |         |          |   |         |         |          |   |         |         |          |   |         |         |          |   |         |         |          |   |          |          |         |   |          |         |         |   |          |         |         |   |          |         |         |   |          |         |         |   |          |          |         |   |          |          |         |   |          |          |         |   |          |          |         |
| H                                                                                                                                                                                                                     | -3.97765                                                                                                                                                                                                                                                                                                                                                                                                                                                                                                                                                                                                                                                                                                                                                                                                                                                                                                                                                                                                                                                                                                                                                                                                                                                                                                                                                                                                                                                                                                                                                                                                                                                                                                                                                                                                                                                                                                                                                                                                                                                                                                                                                                                                                                                                                                                                                                                                                                                                                                                                                                                                                                                                                                                                                                                                                                                                                                                                                                                                                                                                           | -1.02678 | 2.41618  |         |          |   |          |         |          |   |          |          |          |   |          |         |          |   |          |         |          |   |          |          |          |   |          |          |          |   |          |         |          |   |          |         |         |   |          |         |         |   |         |         |         |   |          |         |         |   |          |         |         |   |         |         |         |   |          |         |         |   |          |         |         |   |         |         |         |   |          |         |          |   |          |         |          |   |          |         |         |   |         |         |          |   |         |          |          |   |         |          |          |   |         |          |          |   |         |          |         |   |         |         |         |   |         |         |         |   |          |         |         |   |          |         |         |   |          |         |          |   |          |         |          |                                                                                                                                                                                                                       |                                                                                                                                                                                                                                                                                                                                                                                                                                                                                                                                                                                                                                                                                                                                                                                                                                                                                                                                                                                                                                                                                                                                                                                                                                                                                                                                                                                                                                                                                                                                                                                                                                                                                                                                                                                                                                                                                                                                                                                                                                                                                                                                                                                                                                                                                |         |          |          |          |         |          |          |          |          |          |          |          |          |         |          |          |          |          |         |          |          |         |          |          |          |         |          |          |          |          |         |          |          |          |         |         |          |          |         |          |          |          |                                                                                                                                                                                                                        |                                                                                                                                                                                                                                                                                                                                                                                                                                                                                                                                                                                                                                                                                                                                                                                                                                                                                                                                                                                                                                                                                                                                                                                                                                                                                                                                                                                                                                                                                                                                                                                                                                                                                                                                                                                                                                                                                                                                                                                                                                                                                                                                                                                                                                                                                                                                                                                                                                                                                                                                                                                                                                                                                                                                                                                                                                                                                                                                                                                                                                                                                      |   |          |          |          |   |          |         |          |   |          |          |          |   |          |         |          |   |          |         |          |   |          |          |          |   |          |          |          |   |         |         |          |   |          |         |          |   |          |         |          |   |          |         |          |   |          |          |         |   |          |          |         |   |         |          |         |   |          |          |         |   |         |          |         |   |         |          |          |   |          |          |          |   |          |          |          |   |          |         |          |   |         |          |          |   |         |          |          |   |         |          |          |   |         |          |          |   |         |          |          |   |         |          |          |   |         |          |          |   |         |          |          |   |         |         |          |   |         |         |          |   |         |         |          |   |         |         |          |   |         |         |          |   |          |          |         |   |          |         |         |   |          |         |         |   |          |         |         |   |          |         |         |   |          |          |         |   |          |          |         |   |          |          |         |   |          |          |         |
| H                                                                                                                                                                                                                     | -3.72231                                                                                                                                                                                                                                                                                                                                                                                                                                                                                                                                                                                                                                                                                                                                                                                                                                                                                                                                                                                                                                                                                                                                                                                                                                                                                                                                                                                                                                                                                                                                                                                                                                                                                                                                                                                                                                                                                                                                                                                                                                                                                                                                                                                                                                                                                                                                                                                                                                                                                                                                                                                                                                                                                                                                                                                                                                                                                                                                                                                                                                                                           | -1.91184 | 0.90089  |         |          |   |          |         |          |   |          |          |          |   |          |         |          |   |          |         |          |   |          |          |          |   |          |          |          |   |          |         |          |   |          |         |         |   |          |         |         |   |         |         |         |   |          |         |         |   |          |         |         |   |         |         |         |   |          |         |         |   |          |         |         |   |         |         |         |   |          |         |          |   |          |         |          |   |          |         |         |   |         |         |          |   |         |          |          |   |         |          |          |   |         |          |          |   |         |          |         |   |         |         |         |   |         |         |         |   |          |         |         |   |          |         |         |   |          |         |          |   |          |         |          |                                                                                                                                                                                                                       |                                                                                                                                                                                                                                                                                                                                                                                                                                                                                                                                                                                                                                                                                                                                                                                                                                                                                                                                                                                                                                                                                                                                                                                                                                                                                                                                                                                                                                                                                                                                                                                                                                                                                                                                                                                                                                                                                                                                                                                                                                                                                                                                                                                                                                                                                |         |          |          |          |         |          |          |          |          |          |          |          |          |         |          |          |          |          |         |          |          |         |          |          |          |         |          |          |          |          |         |          |          |          |         |         |          |          |         |          |          |          |                                                                                                                                                                                                                        |                                                                                                                                                                                                                                                                                                                                                                                                                                                                                                                                                                                                                                                                                                                                                                                                                                                                                                                                                                                                                                                                                                                                                                                                                                                                                                                                                                                                                                                                                                                                                                                                                                                                                                                                                                                                                                                                                                                                                                                                                                                                                                                                                                                                                                                                                                                                                                                                                                                                                                                                                                                                                                                                                                                                                                                                                                                                                                                                                                                                                                                                                      |   |          |          |          |   |          |         |          |   |          |          |          |   |          |         |          |   |          |         |          |   |          |          |          |   |          |          |          |   |         |         |          |   |          |         |          |   |          |         |          |   |          |         |          |   |          |          |         |   |          |          |         |   |         |          |         |   |          |          |         |   |         |          |         |   |         |          |          |   |          |          |          |   |          |          |          |   |          |         |          |   |         |          |          |   |         |          |          |   |         |          |          |   |         |          |          |   |         |          |          |   |         |          |          |   |         |          |          |   |         |          |          |   |         |         |          |   |         |         |          |   |         |         |          |   |         |         |          |   |         |         |          |   |          |          |         |   |          |         |         |   |          |         |         |   |          |         |         |   |          |         |         |   |          |          |         |   |          |          |         |   |          |          |         |   |          |          |         |
| H                                                                                                                                                                                                                     | -4.77060                                                                                                                                                                                                                                                                                                                                                                                                                                                                                                                                                                                                                                                                                                                                                                                                                                                                                                                                                                                                                                                                                                                                                                                                                                                                                                                                                                                                                                                                                                                                                                                                                                                                                                                                                                                                                                                                                                                                                                                                                                                                                                                                                                                                                                                                                                                                                                                                                                                                                                                                                                                                                                                                                                                                                                                                                                                                                                                                                                                                                                                                           | -0.47296 | 0.93621  |         |          |   |          |         |          |   |          |          |          |   |          |         |          |   |          |         |          |   |          |          |          |   |          |          |          |   |          |         |          |   |          |         |         |   |          |         |         |   |         |         |         |   |          |         |         |   |          |         |         |   |         |         |         |   |          |         |         |   |          |         |         |   |         |         |         |   |          |         |          |   |          |         |          |   |          |         |         |   |         |         |          |   |         |          |          |   |         |          |          |   |         |          |          |   |         |          |         |   |         |         |         |   |         |         |         |   |          |         |         |   |          |         |         |   |          |         |          |   |          |         |          |                                                                                                                                                                                                                       |                                                                                                                                                                                                                                                                                                                                                                                                                                                                                                                                                                                                                                                                                                                                                                                                                                                                                                                                                                                                                                                                                                                                                                                                                                                                                                                                                                                                                                                                                                                                                                                                                                                                                                                                                                                                                                                                                                                                                                                                                                                                                                                                                                                                                                                                                |         |          |          |          |         |          |          |          |          |          |          |          |          |         |          |          |          |          |         |          |          |         |          |          |          |         |          |          |          |          |         |          |          |          |         |         |          |          |         |          |          |          |                                                                                                                                                                                                                        |                                                                                                                                                                                                                                                                                                                                                                                                                                                                                                                                                                                                                                                                                                                                                                                                                                                                                                                                                                                                                                                                                                                                                                                                                                                                                                                                                                                                                                                                                                                                                                                                                                                                                                                                                                                                                                                                                                                                                                                                                                                                                                                                                                                                                                                                                                                                                                                                                                                                                                                                                                                                                                                                                                                                                                                                                                                                                                                                                                                                                                                                                      |   |          |          |          |   |          |         |          |   |          |          |          |   |          |         |          |   |          |         |          |   |          |          |          |   |          |          |          |   |         |         |          |   |          |         |          |   |          |         |          |   |          |         |          |   |          |          |         |   |          |          |         |   |         |          |         |   |          |          |         |   |         |          |         |   |         |          |          |   |          |          |          |   |          |          |          |   |          |         |          |   |         |          |          |   |         |          |          |   |         |          |          |   |         |          |          |   |         |          |          |   |         |          |          |   |         |          |          |   |         |          |          |   |         |         |          |   |         |         |          |   |         |         |          |   |         |         |          |   |         |         |          |   |          |          |         |   |          |         |         |   |          |         |         |   |          |         |         |   |          |         |         |   |          |          |         |   |          |          |         |   |          |          |         |   |          |          |         |

|                                                                                                                                                                                                                       |                                                                                                                                                                                                                                                                                                                                                                                                                                                                                                                                                                                                                                                                                                                                                                                                                                                                                                                                                                                                                                                                                                                                                                                                                                                                                                                                                                                                                                                                                                                                                                                                                                                                                                                                                                                                                                                                                                                                                                                                                                                                                                                                                                                                                                                                                                                                                                                                                                                                                                                                                                                                                                                                                                                                                                                              |          |          |          |          |   |          |         |          |   |          |          |          |   |          |          |          |   |          |         |          |   |          |          |          |   |          |          |          |   |          |          |          |   |          |         |          |   |          |          |         |   |                                                                                                                                                                                                                                                                                                                                                                                                                                                                                                                                                                                                                                                                                                                                                                     |          |         |         |          |          |         |         |          |         |          |          |          |          |         |         |          |          |          |         |          |         |         |          |          |          |          |          |          |          |          |          |          |          |          |         |          |          |          |          |          |          |          |   |          |          |          |   |          |          |          |   |          |          |          |   |          |          |         |   |          |          |         |   |          |          |         |   |          |          |         |   |          |          |          |   |          |          |         |   |          |         |         |   |          |         |          |   |          |         |         |   |          |         |         |                                                                                                                                                                                                                       |                                                                                                                                                                                                                                                                                                                                                                                                                                                                                                                                                                                                                                                                                                                                                                                                                                                                                                                                                                                                                                                                                                                                                                                                                                                                                                                                                                                                                                                                                                                                                                                                                                                                                                                                                                                                                                                                                                                                                                                                                                                                                                                                                                                                                                                                                                                                                                                                                                                                                                         |         |          |         |          |          |         |         |          |         |          |          |          |         |          |                                                                                                                                                                                                                        |                                                                                                                                                                                                                                                                                                                                                                                                                                                                                                                                                                                                                                                                                                                                                                                                                                                                                                                                                                                                                                                                                                                                                                                                                                                                                                                                                                                                                                                                                                                                                                                                                                                                                                                                                                                                                                                                                                                                                                                                                                                                                                                                                                                                                                                                                                                                                                                                                                                                                                                                                                                                                                                                                                                                                                                                |   |          |          |          |   |         |          |          |   |          |          |          |   |          |          |          |   |          |          |         |   |          |          |         |   |          |          |          |   |          |          |          |   |          |          |          |   |         |          |         |   |          |          |         |   |          |         |          |   |          |          |          |   |          |         |          |   |          |          |         |   |          |          |          |   |          |          |         |   |          |         |          |   |          |          |          |   |          |         |          |   |          |          |          |   |          |          |          |   |          |          |          |   |          |          |          |   |          |         |         |   |          |         |         |   |         |          |          |   |          |          |          |   |          |          |          |   |          |          |          |   |          |          |         |   |          |          |         |   |         |         |          |   |         |         |          |   |         |         |          |   |         |         |          |   |          |         |          |   |          |          |         |
|-----------------------------------------------------------------------------------------------------------------------------------------------------------------------------------------------------------------------|----------------------------------------------------------------------------------------------------------------------------------------------------------------------------------------------------------------------------------------------------------------------------------------------------------------------------------------------------------------------------------------------------------------------------------------------------------------------------------------------------------------------------------------------------------------------------------------------------------------------------------------------------------------------------------------------------------------------------------------------------------------------------------------------------------------------------------------------------------------------------------------------------------------------------------------------------------------------------------------------------------------------------------------------------------------------------------------------------------------------------------------------------------------------------------------------------------------------------------------------------------------------------------------------------------------------------------------------------------------------------------------------------------------------------------------------------------------------------------------------------------------------------------------------------------------------------------------------------------------------------------------------------------------------------------------------------------------------------------------------------------------------------------------------------------------------------------------------------------------------------------------------------------------------------------------------------------------------------------------------------------------------------------------------------------------------------------------------------------------------------------------------------------------------------------------------------------------------------------------------------------------------------------------------------------------------------------------------------------------------------------------------------------------------------------------------------------------------------------------------------------------------------------------------------------------------------------------------------------------------------------------------------------------------------------------------------------------------------------------------------------------------------------------------|----------|----------|----------|----------|---|----------|---------|----------|---|----------|----------|----------|---|----------|----------|----------|---|----------|---------|----------|---|----------|----------|----------|---|----------|----------|----------|---|----------|----------|----------|---|----------|---------|----------|---|----------|----------|---------|---|---------------------------------------------------------------------------------------------------------------------------------------------------------------------------------------------------------------------------------------------------------------------------------------------------------------------------------------------------------------------------------------------------------------------------------------------------------------------------------------------------------------------------------------------------------------------------------------------------------------------------------------------------------------------------------------------------------------------------------------------------------------------|----------|---------|---------|----------|----------|---------|---------|----------|---------|----------|----------|----------|----------|---------|---------|----------|----------|----------|---------|----------|---------|---------|----------|----------|----------|----------|----------|----------|----------|----------|----------|----------|----------|----------|---------|----------|----------|----------|----------|----------|----------|----------|---|----------|----------|----------|---|----------|----------|----------|---|----------|----------|----------|---|----------|----------|---------|---|----------|----------|---------|---|----------|----------|---------|---|----------|----------|---------|---|----------|----------|----------|---|----------|----------|---------|---|----------|---------|---------|---|----------|---------|----------|---|----------|---------|---------|---|----------|---------|---------|-----------------------------------------------------------------------------------------------------------------------------------------------------------------------------------------------------------------------|---------------------------------------------------------------------------------------------------------------------------------------------------------------------------------------------------------------------------------------------------------------------------------------------------------------------------------------------------------------------------------------------------------------------------------------------------------------------------------------------------------------------------------------------------------------------------------------------------------------------------------------------------------------------------------------------------------------------------------------------------------------------------------------------------------------------------------------------------------------------------------------------------------------------------------------------------------------------------------------------------------------------------------------------------------------------------------------------------------------------------------------------------------------------------------------------------------------------------------------------------------------------------------------------------------------------------------------------------------------------------------------------------------------------------------------------------------------------------------------------------------------------------------------------------------------------------------------------------------------------------------------------------------------------------------------------------------------------------------------------------------------------------------------------------------------------------------------------------------------------------------------------------------------------------------------------------------------------------------------------------------------------------------------------------------------------------------------------------------------------------------------------------------------------------------------------------------------------------------------------------------------------------------------------------------------------------------------------------------------------------------------------------------------------------------------------------------------------------------------------------------|---------|----------|---------|----------|----------|---------|---------|----------|---------|----------|----------|----------|---------|----------|------------------------------------------------------------------------------------------------------------------------------------------------------------------------------------------------------------------------|------------------------------------------------------------------------------------------------------------------------------------------------------------------------------------------------------------------------------------------------------------------------------------------------------------------------------------------------------------------------------------------------------------------------------------------------------------------------------------------------------------------------------------------------------------------------------------------------------------------------------------------------------------------------------------------------------------------------------------------------------------------------------------------------------------------------------------------------------------------------------------------------------------------------------------------------------------------------------------------------------------------------------------------------------------------------------------------------------------------------------------------------------------------------------------------------------------------------------------------------------------------------------------------------------------------------------------------------------------------------------------------------------------------------------------------------------------------------------------------------------------------------------------------------------------------------------------------------------------------------------------------------------------------------------------------------------------------------------------------------------------------------------------------------------------------------------------------------------------------------------------------------------------------------------------------------------------------------------------------------------------------------------------------------------------------------------------------------------------------------------------------------------------------------------------------------------------------------------------------------------------------------------------------------------------------------------------------------------------------------------------------------------------------------------------------------------------------------------------------------------------------------------------------------------------------------------------------------------------------------------------------------------------------------------------------------------------------------------------------------------------------------------------------------|---|----------|----------|----------|---|---------|----------|----------|---|----------|----------|----------|---|----------|----------|----------|---|----------|----------|---------|---|----------|----------|---------|---|----------|----------|----------|---|----------|----------|----------|---|----------|----------|----------|---|---------|----------|---------|---|----------|----------|---------|---|----------|---------|----------|---|----------|----------|----------|---|----------|---------|----------|---|----------|----------|---------|---|----------|----------|----------|---|----------|----------|---------|---|----------|---------|----------|---|----------|----------|----------|---|----------|---------|----------|---|----------|----------|----------|---|----------|----------|----------|---|----------|----------|----------|---|----------|----------|----------|---|----------|---------|---------|---|----------|---------|---------|---|---------|----------|----------|---|----------|----------|----------|---|----------|----------|----------|---|----------|----------|----------|---|----------|----------|---------|---|----------|----------|---------|---|---------|---------|----------|---|---------|---------|----------|---|---------|---------|----------|---|---------|---------|----------|---|----------|---------|----------|---|----------|----------|---------|
| 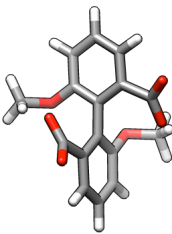 <p><b>2g</b><br/>                     -1068.177143<br/>                     -1067.982008<br/>                     -1068.899463</p>  | <table border="1"> <tbody> <tr><td>C</td><td>-1.01081</td><td>1.93557</td><td>-3.05517</td></tr> <tr><td>C</td><td>-1.08994</td><td>0.79221</td><td>-0.48317</td></tr> <tr><td>C</td><td>-1.13261</td><td>0.56475</td><td>-2.89594</td></tr> <tr><td>C</td><td>-0.98089</td><td>2.75754</td><td>-1.93321</td></tr> <tr><td>C</td><td>-1.04250</td><td>2.18559</td><td>-0.66721</td></tr> <tr><td>C</td><td>-1.17230</td><td>-0.02694</td><td>-1.62805</td></tr> <tr><td>C</td><td>-1.08774</td><td>0.25091</td><td>0.90988</td></tr> <tr><td>C</td><td>-1.16131</td><td>-0.89524</td><td>3.48081</td></tr> <tr><td>C</td><td>-0.09384</td><td>0.56861</td><td>1.85849</td></tr> <tr><td>C</td><td>-2.14258</td><td>-0.58829</td><td>1.31083</td></tr> <tr><td>C</td><td>-2.17535</td><td>-1.17587</td><td>2.57073</td></tr> <tr><td>C</td><td>-0.15270</td><td>-0.01243</td><td>3.13055</td></tr> <tr><td>H</td><td>-0.95702</td><td>2.37228</td><td>-4.04840</td></tr> <tr><td>H</td><td>-1.17462</td><td>-1.35409</td><td>4.46539</td></tr> <tr><td>H</td><td>-0.91273</td><td>3.83342</td><td>-2.03110</td></tr> <tr><td>H</td><td>0.61532</td><td>0.26989</td><td>3.83836</td></tr> <tr><td>H</td><td>-1.21820</td><td>-0.09294</td><td>-3.75076</td></tr> <tr><td>H</td><td>-2.98891</td><td>-1.84154</td><td>2.82909</td></tr> <tr><td>C</td><td>-1.31534</td><td>-1.56931</td><td>-1.60206</td></tr> <tr><td>O</td><td>-0.67772</td><td>-2.19488</td><td>-0.72998</td></tr> <tr><td>O</td><td>-2.08110</td><td>-2.03975</td><td>-2.48322</td></tr> <tr><td>C</td><td>1.08714</td><td>1.53999</td><td>1.60927</td></tr> <tr><td>O</td><td>1.38382</td><td>2.26780</td><td>2.59230</td></tr> <tr><td>O</td><td>1.62589</td><td>1.51900</td><td>0.48328</td></tr> <tr><td>O</td><td>-1.10410</td><td>2.98289</td><td>0.45270</td></tr> <tr><td>O</td><td>-3.17999</td><td>-0.78143</td><td>0.42753</td></tr> <tr><td>C</td><td>-3.66302</td><td>-2.10933</td><td>0.29270</td></tr> <tr><td>H</td><td>-2.82421</td><td>-2.80636</td><td>0.22335</td></tr> <tr><td>H</td><td>-4.21239</td><td>-2.13684</td><td>-0.64755</td></tr> <tr><td>H</td><td>-4.32582</td><td>-2.38072</td><td>1.12880</td></tr> <tr><td>C</td><td>-0.21174</td><td>4.08571</td><td>0.49946</td></tr> <tr><td>H</td><td>-0.57674</td><td>4.92213</td><td>-0.11635</td></tr> <tr><td>H</td><td>0.78428</td><td>3.77392</td><td>0.17542</td></tr> <tr><td>H</td><td>-0.15591</td><td>4.38484</td><td>1.54542</td></tr> </tbody> </table>                                                                                                                                                                                                                                                                              | C        | -1.01081 | 1.93557  | -3.05517 | C | -1.08994 | 0.79221 | -0.48317 | C | -1.13261 | 0.56475  | -2.89594 | C | -0.98089 | 2.75754  | -1.93321 | C | -1.04250 | 2.18559 | -0.66721 | C | -1.17230 | -0.02694 | -1.62805 | C | -1.08774 | 0.25091  | 0.90988  | C | -1.16131 | -0.89524 | 3.48081  | C | -0.09384 | 0.56861 | 1.85849  | C | -2.14258 | -0.58829 | 1.31083 | C | -2.17535                                                                                                                                                                                                                                                                                                                                                                                                                                                                                                                                                                                                                                                                                                                                                            | -1.17587 | 2.57073 | C       | -0.15270 | -0.01243 | 3.13055 | H       | -0.95702 | 2.37228 | -4.04840 | H        | -1.17462 | -1.35409 | 4.46539 | H       | -0.91273 | 3.83342  | -2.03110 | H       | 0.61532  | 0.26989 | 3.83836 | H        | -1.21820 | -0.09294 | -3.75076 | H        | -2.98891 | -1.84154 | 2.82909  | C        | -1.31534 | -1.56931 | -1.60206 | O       | -0.67772 | -2.19488 | -0.72998 | O        | -2.08110 | -2.03975 | -2.48322 | C | 1.08714  | 1.53999  | 1.60927  | O | 1.38382  | 2.26780  | 2.59230  | O | 1.62589  | 1.51900  | 0.48328  | O | -1.10410 | 2.98289  | 0.45270 | O | -3.17999 | -0.78143 | 0.42753 | C | -3.66302 | -2.10933 | 0.29270 | H | -2.82421 | -2.80636 | 0.22335 | H | -4.21239 | -2.13684 | -0.64755 | H | -4.32582 | -2.38072 | 1.12880 | C | -0.21174 | 4.08571 | 0.49946 | H | -0.57674 | 4.92213 | -0.11635 | H | 0.78428  | 3.77392 | 0.17542 | H | -0.15591 | 4.38484 | 1.54542 |  <p><b>2g</b><br/>                     -1068.138459<br/>                     -1067.946502<br/>                     -1068.863514</p> | <table border="1"> <tbody> <tr><td>C</td><td>-0.46295</td><td>0.60050</td><td>-3.51715</td></tr> <tr><td>C</td><td>0.01424</td><td>0.16357</td><td>-0.73328</td></tr> <tr><td>C</td><td>-0.12185</td><td>-0.66433</td><td>-3.06279</td></tr> <tr><td>C</td><td>-0.36233</td><td>1.66458</td><td>-2.63833</td></tr> <tr><td>C</td><td>-0.05262</td><td>1.48597</td><td>-1.28431</td></tr> <tr><td>C</td><td>0.19283</td><td>-0.85690</td><td>-1.71588</td></tr> <tr><td>C</td><td>-0.01393</td><td>-0.16457</td><td>0.73239</td></tr> <tr><td>C</td><td>0.46643</td><td>-0.60063</td><td>3.51575</td></tr> <tr><td>C</td><td>-0.19213</td><td>0.85598</td><td>1.71492</td></tr> <tr><td>C</td><td>0.05305</td><td>-1.48678</td><td>1.28372</td></tr> <tr><td>C</td><td>0.36440</td><td>-1.66501</td><td>2.63744</td></tr> <tr><td>C</td><td>0.12446</td><td>0.66401</td><td>3.06147</td></tr> <tr><td>H</td><td>-0.73550</td><td>0.75632</td><td>-4.55693</td></tr> <tr><td>H</td><td>0.74058</td><td>-0.75599</td><td>4.55517</td></tr> <tr><td>H</td><td>0.49425</td><td>-2.68507</td><td>2.97381</td></tr> <tr><td>H</td><td>-0.49217</td><td>2.68467</td><td>-2.97462</td></tr> <tr><td>H</td><td>-0.05954</td><td>-1.49732</td><td>-3.74757</td></tr> <tr><td>H</td><td>0.06310</td><td>1.49716</td><td>3.74611</td></tr> <tr><td>C</td><td>-0.42826</td><td>-2.81306</td><td>0.62965</td></tr> <tr><td>O</td><td>0.25471</td><td>-3.84204</td><td>0.85360</td></tr> <tr><td>O</td><td>-1.53011</td><td>-2.73294</td><td>0.04229</td></tr> <tr><td>C</td><td>0.42674</td><td>2.81256</td><td>-0.62954</td></tr> <tr><td>O</td><td>1.52936</td><td>2.73399</td><td>-0.04373</td></tr> <tr><td>O</td><td>-0.25846</td><td>3.84049</td><td>-0.85165</td></tr> <tr><td>O</td><td>0.80428</td><td>-2.00947</td><td>-1.33349</td></tr> <tr><td>O</td><td>-0.80507</td><td>2.00758</td><td>1.33250</td></tr> <tr><td>C</td><td>-0.61452</td><td>3.18459</td><td>2.09075</td></tr> <tr><td>H</td><td>0.44863</td><td>3.33360</td><td>2.29524</td></tr> <tr><td>H</td><td>-1.18261</td><td>3.14389</td><td>3.03150</td></tr> <tr><td>H</td><td>-0.96220</td><td>3.99395</td><td>1.45138</td></tr> <tr><td>C</td><td>0.60925</td><td>-3.18688</td><td>-2.09033</td></tr> <tr><td>H</td><td>1.17704</td><td>-3.14950</td><td>-3.03139</td></tr> <tr><td>H</td><td>-0.45455</td><td>-3.33240</td><td>-2.29398</td></tr> <tr><td>H</td><td>0.95426</td><td>-3.99673</td><td>-1.45015</td></tr> </tbody> </table> | C       | -0.46295 | 0.60050 | -3.51715 | C        | 0.01424 | 0.16357 | -0.73328 | C       | -0.12185 | -0.66433 | -3.06279 | C       | -0.36233 | 1.66458                                                                                                                                                                                                                | -2.63833                                                                                                                                                                                                                                                                                                                                                                                                                                                                                                                                                                                                                                                                                                                                                                                                                                                                                                                                                                                                                                                                                                                                                                                                                                                                                                                                                                                                                                                                                                                                                                                                                                                                                                                                                                                                                                                                                                                                                                                                                                                                                                                                                                                                                                                                                                                                                                                                                                                                                                                                                                                                                                                                                                                                                                                       | C | -0.05262 | 1.48597  | -1.28431 | C | 0.19283 | -0.85690 | -1.71588 | C | -0.01393 | -0.16457 | 0.73239  | C | 0.46643  | -0.60063 | 3.51575  | C | -0.19213 | 0.85598  | 1.71492 | C | 0.05305  | -1.48678 | 1.28372 | C | 0.36440  | -1.66501 | 2.63744  | C | 0.12446  | 0.66401  | 3.06147  | H | -0.73550 | 0.75632  | -4.55693 | H | 0.74058 | -0.75599 | 4.55517 | H | 0.49425  | -2.68507 | 2.97381 | H | -0.49217 | 2.68467 | -2.97462 | H | -0.05954 | -1.49732 | -3.74757 | H | 0.06310  | 1.49716 | 3.74611  | C | -0.42826 | -2.81306 | 0.62965 | O | 0.25471  | -3.84204 | 0.85360  | O | -1.53011 | -2.73294 | 0.04229 | C | 0.42674  | 2.81256 | -0.62954 | O | 1.52936  | 2.73399  | -0.04373 | O | -0.25846 | 3.84049 | -0.85165 | O | 0.80428  | -2.00947 | -1.33349 | O | -0.80507 | 2.00758  | 1.33250  | C | -0.61452 | 3.18459  | 2.09075  | H | 0.44863  | 3.33360  | 2.29524  | H | -1.18261 | 3.14389 | 3.03150 | H | -0.96220 | 3.99395 | 1.45138 | C | 0.60925 | -3.18688 | -2.09033 | H | 1.17704  | -3.14950 | -3.03139 | H | -0.45455 | -3.33240 | -2.29398 | H | 0.95426  | -3.99673 | -1.45015 |   |          |          |         |   |          |          |         |   |         |         |          |   |         |         |          |   |         |         |          |   |         |         |          |   |          |         |          |   |          |          |         |
| C                                                                                                                                                                                                                     | -1.01081                                                                                                                                                                                                                                                                                                                                                                                                                                                                                                                                                                                                                                                                                                                                                                                                                                                                                                                                                                                                                                                                                                                                                                                                                                                                                                                                                                                                                                                                                                                                                                                                                                                                                                                                                                                                                                                                                                                                                                                                                                                                                                                                                                                                                                                                                                                                                                                                                                                                                                                                                                                                                                                                                                                                                                                     | 1.93557  | -3.05517 |          |          |   |          |         |          |   |          |          |          |   |          |          |          |   |          |         |          |   |          |          |          |   |          |          |          |   |          |          |          |   |          |         |          |   |          |          |         |   |                                                                                                                                                                                                                                                                                                                                                                                                                                                                                                                                                                                                                                                                                                                                                                     |          |         |         |          |          |         |         |          |         |          |          |          |          |         |         |          |          |          |         |          |         |         |          |          |          |          |          |          |          |          |          |          |          |          |         |          |          |          |          |          |          |          |   |          |          |          |   |          |          |          |   |          |          |          |   |          |          |         |   |          |          |         |   |          |          |         |   |          |          |         |   |          |          |          |   |          |          |         |   |          |         |         |   |          |         |          |   |          |         |         |   |          |         |         |                                                                                                                                                                                                                       |                                                                                                                                                                                                                                                                                                                                                                                                                                                                                                                                                                                                                                                                                                                                                                                                                                                                                                                                                                                                                                                                                                                                                                                                                                                                                                                                                                                                                                                                                                                                                                                                                                                                                                                                                                                                                                                                                                                                                                                                                                                                                                                                                                                                                                                                                                                                                                                                                                                                                                         |         |          |         |          |          |         |         |          |         |          |          |          |         |          |                                                                                                                                                                                                                        |                                                                                                                                                                                                                                                                                                                                                                                                                                                                                                                                                                                                                                                                                                                                                                                                                                                                                                                                                                                                                                                                                                                                                                                                                                                                                                                                                                                                                                                                                                                                                                                                                                                                                                                                                                                                                                                                                                                                                                                                                                                                                                                                                                                                                                                                                                                                                                                                                                                                                                                                                                                                                                                                                                                                                                                                |   |          |          |          |   |         |          |          |   |          |          |          |   |          |          |          |   |          |          |         |   |          |          |         |   |          |          |          |   |          |          |          |   |          |          |          |   |         |          |         |   |          |          |         |   |          |         |          |   |          |          |          |   |          |         |          |   |          |          |         |   |          |          |          |   |          |          |         |   |          |         |          |   |          |          |          |   |          |         |          |   |          |          |          |   |          |          |          |   |          |          |          |   |          |          |          |   |          |         |         |   |          |         |         |   |         |          |          |   |          |          |          |   |          |          |          |   |          |          |          |   |          |          |         |   |          |          |         |   |         |         |          |   |         |         |          |   |         |         |          |   |         |         |          |   |          |         |          |   |          |          |         |
| C                                                                                                                                                                                                                     | -1.08994                                                                                                                                                                                                                                                                                                                                                                                                                                                                                                                                                                                                                                                                                                                                                                                                                                                                                                                                                                                                                                                                                                                                                                                                                                                                                                                                                                                                                                                                                                                                                                                                                                                                                                                                                                                                                                                                                                                                                                                                                                                                                                                                                                                                                                                                                                                                                                                                                                                                                                                                                                                                                                                                                                                                                                                     | 0.79221  | -0.48317 |          |          |   |          |         |          |   |          |          |          |   |          |          |          |   |          |         |          |   |          |          |          |   |          |          |          |   |          |          |          |   |          |         |          |   |          |          |         |   |                                                                                                                                                                                                                                                                                                                                                                                                                                                                                                                                                                                                                                                                                                                                                                     |          |         |         |          |          |         |         |          |         |          |          |          |          |         |         |          |          |          |         |          |         |         |          |          |          |          |          |          |          |          |          |          |          |          |         |          |          |          |          |          |          |          |   |          |          |          |   |          |          |          |   |          |          |          |   |          |          |         |   |          |          |         |   |          |          |         |   |          |          |         |   |          |          |          |   |          |          |         |   |          |         |         |   |          |         |          |   |          |         |         |   |          |         |         |                                                                                                                                                                                                                       |                                                                                                                                                                                                                                                                                                                                                                                                                                                                                                                                                                                                                                                                                                                                                                                                                                                                                                                                                                                                                                                                                                                                                                                                                                                                                                                                                                                                                                                                                                                                                                                                                                                                                                                                                                                                                                                                                                                                                                                                                                                                                                                                                                                                                                                                                                                                                                                                                                                                                                         |         |          |         |          |          |         |         |          |         |          |          |          |         |          |                                                                                                                                                                                                                        |                                                                                                                                                                                                                                                                                                                                                                                                                                                                                                                                                                                                                                                                                                                                                                                                                                                                                                                                                                                                                                                                                                                                                                                                                                                                                                                                                                                                                                                                                                                                                                                                                                                                                                                                                                                                                                                                                                                                                                                                                                                                                                                                                                                                                                                                                                                                                                                                                                                                                                                                                                                                                                                                                                                                                                                                |   |          |          |          |   |         |          |          |   |          |          |          |   |          |          |          |   |          |          |         |   |          |          |         |   |          |          |          |   |          |          |          |   |          |          |          |   |         |          |         |   |          |          |         |   |          |         |          |   |          |          |          |   |          |         |          |   |          |          |         |   |          |          |          |   |          |          |         |   |          |         |          |   |          |          |          |   |          |         |          |   |          |          |          |   |          |          |          |   |          |          |          |   |          |          |          |   |          |         |         |   |          |         |         |   |         |          |          |   |          |          |          |   |          |          |          |   |          |          |          |   |          |          |         |   |          |          |         |   |         |         |          |   |         |         |          |   |         |         |          |   |         |         |          |   |          |         |          |   |          |          |         |
| C                                                                                                                                                                                                                     | -1.13261                                                                                                                                                                                                                                                                                                                                                                                                                                                                                                                                                                                                                                                                                                                                                                                                                                                                                                                                                                                                                                                                                                                                                                                                                                                                                                                                                                                                                                                                                                                                                                                                                                                                                                                                                                                                                                                                                                                                                                                                                                                                                                                                                                                                                                                                                                                                                                                                                                                                                                                                                                                                                                                                                                                                                                                     | 0.56475  | -2.89594 |          |          |   |          |         |          |   |          |          |          |   |          |          |          |   |          |         |          |   |          |          |          |   |          |          |          |   |          |          |          |   |          |         |          |   |          |          |         |   |                                                                                                                                                                                                                                                                                                                                                                                                                                                                                                                                                                                                                                                                                                                                                                     |          |         |         |          |          |         |         |          |         |          |          |          |          |         |         |          |          |          |         |          |         |         |          |          |          |          |          |          |          |          |          |          |          |          |         |          |          |          |          |          |          |          |   |          |          |          |   |          |          |          |   |          |          |          |   |          |          |         |   |          |          |         |   |          |          |         |   |          |          |         |   |          |          |          |   |          |          |         |   |          |         |         |   |          |         |          |   |          |         |         |   |          |         |         |                                                                                                                                                                                                                       |                                                                                                                                                                                                                                                                                                                                                                                                                                                                                                                                                                                                                                                                                                                                                                                                                                                                                                                                                                                                                                                                                                                                                                                                                                                                                                                                                                                                                                                                                                                                                                                                                                                                                                                                                                                                                                                                                                                                                                                                                                                                                                                                                                                                                                                                                                                                                                                                                                                                                                         |         |          |         |          |          |         |         |          |         |          |          |          |         |          |                                                                                                                                                                                                                        |                                                                                                                                                                                                                                                                                                                                                                                                                                                                                                                                                                                                                                                                                                                                                                                                                                                                                                                                                                                                                                                                                                                                                                                                                                                                                                                                                                                                                                                                                                                                                                                                                                                                                                                                                                                                                                                                                                                                                                                                                                                                                                                                                                                                                                                                                                                                                                                                                                                                                                                                                                                                                                                                                                                                                                                                |   |          |          |          |   |         |          |          |   |          |          |          |   |          |          |          |   |          |          |         |   |          |          |         |   |          |          |          |   |          |          |          |   |          |          |          |   |         |          |         |   |          |          |         |   |          |         |          |   |          |          |          |   |          |         |          |   |          |          |         |   |          |          |          |   |          |          |         |   |          |         |          |   |          |          |          |   |          |         |          |   |          |          |          |   |          |          |          |   |          |          |          |   |          |          |          |   |          |         |         |   |          |         |         |   |         |          |          |   |          |          |          |   |          |          |          |   |          |          |          |   |          |          |         |   |          |          |         |   |         |         |          |   |         |         |          |   |         |         |          |   |         |         |          |   |          |         |          |   |          |          |         |
| C                                                                                                                                                                                                                     | -0.98089                                                                                                                                                                                                                                                                                                                                                                                                                                                                                                                                                                                                                                                                                                                                                                                                                                                                                                                                                                                                                                                                                                                                                                                                                                                                                                                                                                                                                                                                                                                                                                                                                                                                                                                                                                                                                                                                                                                                                                                                                                                                                                                                                                                                                                                                                                                                                                                                                                                                                                                                                                                                                                                                                                                                                                                     | 2.75754  | -1.93321 |          |          |   |          |         |          |   |          |          |          |   |          |          |          |   |          |         |          |   |          |          |          |   |          |          |          |   |          |          |          |   |          |         |          |   |          |          |         |   |                                                                                                                                                                                                                                                                                                                                                                                                                                                                                                                                                                                                                                                                                                                                                                     |          |         |         |          |          |         |         |          |         |          |          |          |          |         |         |          |          |          |         |          |         |         |          |          |          |          |          |          |          |          |          |          |          |          |         |          |          |          |          |          |          |          |   |          |          |          |   |          |          |          |   |          |          |          |   |          |          |         |   |          |          |         |   |          |          |         |   |          |          |         |   |          |          |          |   |          |          |         |   |          |         |         |   |          |         |          |   |          |         |         |   |          |         |         |                                                                                                                                                                                                                       |                                                                                                                                                                                                                                                                                                                                                                                                                                                                                                                                                                                                                                                                                                                                                                                                                                                                                                                                                                                                                                                                                                                                                                                                                                                                                                                                                                                                                                                                                                                                                                                                                                                                                                                                                                                                                                                                                                                                                                                                                                                                                                                                                                                                                                                                                                                                                                                                                                                                                                         |         |          |         |          |          |         |         |          |         |          |          |          |         |          |                                                                                                                                                                                                                        |                                                                                                                                                                                                                                                                                                                                                                                                                                                                                                                                                                                                                                                                                                                                                                                                                                                                                                                                                                                                                                                                                                                                                                                                                                                                                                                                                                                                                                                                                                                                                                                                                                                                                                                                                                                                                                                                                                                                                                                                                                                                                                                                                                                                                                                                                                                                                                                                                                                                                                                                                                                                                                                                                                                                                                                                |   |          |          |          |   |         |          |          |   |          |          |          |   |          |          |          |   |          |          |         |   |          |          |         |   |          |          |          |   |          |          |          |   |          |          |          |   |         |          |         |   |          |          |         |   |          |         |          |   |          |          |          |   |          |         |          |   |          |          |         |   |          |          |          |   |          |          |         |   |          |         |          |   |          |          |          |   |          |         |          |   |          |          |          |   |          |          |          |   |          |          |          |   |          |          |          |   |          |         |         |   |          |         |         |   |         |          |          |   |          |          |          |   |          |          |          |   |          |          |          |   |          |          |         |   |          |          |         |   |         |         |          |   |         |         |          |   |         |         |          |   |         |         |          |   |          |         |          |   |          |          |         |
| C                                                                                                                                                                                                                     | -1.04250                                                                                                                                                                                                                                                                                                                                                                                                                                                                                                                                                                                                                                                                                                                                                                                                                                                                                                                                                                                                                                                                                                                                                                                                                                                                                                                                                                                                                                                                                                                                                                                                                                                                                                                                                                                                                                                                                                                                                                                                                                                                                                                                                                                                                                                                                                                                                                                                                                                                                                                                                                                                                                                                                                                                                                                     | 2.18559  | -0.66721 |          |          |   |          |         |          |   |          |          |          |   |          |          |          |   |          |         |          |   |          |          |          |   |          |          |          |   |          |          |          |   |          |         |          |   |          |          |         |   |                                                                                                                                                                                                                                                                                                                                                                                                                                                                                                                                                                                                                                                                                                                                                                     |          |         |         |          |          |         |         |          |         |          |          |          |          |         |         |          |          |          |         |          |         |         |          |          |          |          |          |          |          |          |          |          |          |          |         |          |          |          |          |          |          |          |   |          |          |          |   |          |          |          |   |          |          |          |   |          |          |         |   |          |          |         |   |          |          |         |   |          |          |         |   |          |          |          |   |          |          |         |   |          |         |         |   |          |         |          |   |          |         |         |   |          |         |         |                                                                                                                                                                                                                       |                                                                                                                                                                                                                                                                                                                                                                                                                                                                                                                                                                                                                                                                                                                                                                                                                                                                                                                                                                                                                                                                                                                                                                                                                                                                                                                                                                                                                                                                                                                                                                                                                                                                                                                                                                                                                                                                                                                                                                                                                                                                                                                                                                                                                                                                                                                                                                                                                                                                                                         |         |          |         |          |          |         |         |          |         |          |          |          |         |          |                                                                                                                                                                                                                        |                                                                                                                                                                                                                                                                                                                                                                                                                                                                                                                                                                                                                                                                                                                                                                                                                                                                                                                                                                                                                                                                                                                                                                                                                                                                                                                                                                                                                                                                                                                                                                                                                                                                                                                                                                                                                                                                                                                                                                                                                                                                                                                                                                                                                                                                                                                                                                                                                                                                                                                                                                                                                                                                                                                                                                                                |   |          |          |          |   |         |          |          |   |          |          |          |   |          |          |          |   |          |          |         |   |          |          |         |   |          |          |          |   |          |          |          |   |          |          |          |   |         |          |         |   |          |          |         |   |          |         |          |   |          |          |          |   |          |         |          |   |          |          |         |   |          |          |          |   |          |          |         |   |          |         |          |   |          |          |          |   |          |         |          |   |          |          |          |   |          |          |          |   |          |          |          |   |          |          |          |   |          |         |         |   |          |         |         |   |         |          |          |   |          |          |          |   |          |          |          |   |          |          |          |   |          |          |         |   |          |          |         |   |         |         |          |   |         |         |          |   |         |         |          |   |         |         |          |   |          |         |          |   |          |          |         |
| C                                                                                                                                                                                                                     | -1.17230                                                                                                                                                                                                                                                                                                                                                                                                                                                                                                                                                                                                                                                                                                                                                                                                                                                                                                                                                                                                                                                                                                                                                                                                                                                                                                                                                                                                                                                                                                                                                                                                                                                                                                                                                                                                                                                                                                                                                                                                                                                                                                                                                                                                                                                                                                                                                                                                                                                                                                                                                                                                                                                                                                                                                                                     | -0.02694 | -1.62805 |          |          |   |          |         |          |   |          |          |          |   |          |          |          |   |          |         |          |   |          |          |          |   |          |          |          |   |          |          |          |   |          |         |          |   |          |          |         |   |                                                                                                                                                                                                                                                                                                                                                                                                                                                                                                                                                                                                                                                                                                                                                                     |          |         |         |          |          |         |         |          |         |          |          |          |          |         |         |          |          |          |         |          |         |         |          |          |          |          |          |          |          |          |          |          |          |          |         |          |          |          |          |          |          |          |   |          |          |          |   |          |          |          |   |          |          |          |   |          |          |         |   |          |          |         |   |          |          |         |   |          |          |         |   |          |          |          |   |          |          |         |   |          |         |         |   |          |         |          |   |          |         |         |   |          |         |         |                                                                                                                                                                                                                       |                                                                                                                                                                                                                                                                                                                                                                                                                                                                                                                                                                                                                                                                                                                                                                                                                                                                                                                                                                                                                                                                                                                                                                                                                                                                                                                                                                                                                                                                                                                                                                                                                                                                                                                                                                                                                                                                                                                                                                                                                                                                                                                                                                                                                                                                                                                                                                                                                                                                                                         |         |          |         |          |          |         |         |          |         |          |          |          |         |          |                                                                                                                                                                                                                        |                                                                                                                                                                                                                                                                                                                                                                                                                                                                                                                                                                                                                                                                                                                                                                                                                                                                                                                                                                                                                                                                                                                                                                                                                                                                                                                                                                                                                                                                                                                                                                                                                                                                                                                                                                                                                                                                                                                                                                                                                                                                                                                                                                                                                                                                                                                                                                                                                                                                                                                                                                                                                                                                                                                                                                                                |   |          |          |          |   |         |          |          |   |          |          |          |   |          |          |          |   |          |          |         |   |          |          |         |   |          |          |          |   |          |          |          |   |          |          |          |   |         |          |         |   |          |          |         |   |          |         |          |   |          |          |          |   |          |         |          |   |          |          |         |   |          |          |          |   |          |          |         |   |          |         |          |   |          |          |          |   |          |         |          |   |          |          |          |   |          |          |          |   |          |          |          |   |          |          |          |   |          |         |         |   |          |         |         |   |         |          |          |   |          |          |          |   |          |          |          |   |          |          |          |   |          |          |         |   |          |          |         |   |         |         |          |   |         |         |          |   |         |         |          |   |         |         |          |   |          |         |          |   |          |          |         |
| C                                                                                                                                                                                                                     | -1.08774                                                                                                                                                                                                                                                                                                                                                                                                                                                                                                                                                                                                                                                                                                                                                                                                                                                                                                                                                                                                                                                                                                                                                                                                                                                                                                                                                                                                                                                                                                                                                                                                                                                                                                                                                                                                                                                                                                                                                                                                                                                                                                                                                                                                                                                                                                                                                                                                                                                                                                                                                                                                                                                                                                                                                                                     | 0.25091  | 0.90988  |          |          |   |          |         |          |   |          |          |          |   |          |          |          |   |          |         |          |   |          |          |          |   |          |          |          |   |          |          |          |   |          |         |          |   |          |          |         |   |                                                                                                                                                                                                                                                                                                                                                                                                                                                                                                                                                                                                                                                                                                                                                                     |          |         |         |          |          |         |         |          |         |          |          |          |          |         |         |          |          |          |         |          |         |         |          |          |          |          |          |          |          |          |          |          |          |          |         |          |          |          |          |          |          |          |   |          |          |          |   |          |          |          |   |          |          |          |   |          |          |         |   |          |          |         |   |          |          |         |   |          |          |         |   |          |          |          |   |          |          |         |   |          |         |         |   |          |         |          |   |          |         |         |   |          |         |         |                                                                                                                                                                                                                       |                                                                                                                                                                                                                                                                                                                                                                                                                                                                                                                                                                                                                                                                                                                                                                                                                                                                                                                                                                                                                                                                                                                                                                                                                                                                                                                                                                                                                                                                                                                                                                                                                                                                                                                                                                                                                                                                                                                                                                                                                                                                                                                                                                                                                                                                                                                                                                                                                                                                                                         |         |          |         |          |          |         |         |          |         |          |          |          |         |          |                                                                                                                                                                                                                        |                                                                                                                                                                                                                                                                                                                                                                                                                                                                                                                                                                                                                                                                                                                                                                                                                                                                                                                                                                                                                                                                                                                                                                                                                                                                                                                                                                                                                                                                                                                                                                                                                                                                                                                                                                                                                                                                                                                                                                                                                                                                                                                                                                                                                                                                                                                                                                                                                                                                                                                                                                                                                                                                                                                                                                                                |   |          |          |          |   |         |          |          |   |          |          |          |   |          |          |          |   |          |          |         |   |          |          |         |   |          |          |          |   |          |          |          |   |          |          |          |   |         |          |         |   |          |          |         |   |          |         |          |   |          |          |          |   |          |         |          |   |          |          |         |   |          |          |          |   |          |          |         |   |          |         |          |   |          |          |          |   |          |         |          |   |          |          |          |   |          |          |          |   |          |          |          |   |          |          |          |   |          |         |         |   |          |         |         |   |         |          |          |   |          |          |          |   |          |          |          |   |          |          |          |   |          |          |         |   |          |          |         |   |         |         |          |   |         |         |          |   |         |         |          |   |         |         |          |   |          |         |          |   |          |          |         |
| C                                                                                                                                                                                                                     | -1.16131                                                                                                                                                                                                                                                                                                                                                                                                                                                                                                                                                                                                                                                                                                                                                                                                                                                                                                                                                                                                                                                                                                                                                                                                                                                                                                                                                                                                                                                                                                                                                                                                                                                                                                                                                                                                                                                                                                                                                                                                                                                                                                                                                                                                                                                                                                                                                                                                                                                                                                                                                                                                                                                                                                                                                                                     | -0.89524 | 3.48081  |          |          |   |          |         |          |   |          |          |          |   |          |          |          |   |          |         |          |   |          |          |          |   |          |          |          |   |          |          |          |   |          |         |          |   |          |          |         |   |                                                                                                                                                                                                                                                                                                                                                                                                                                                                                                                                                                                                                                                                                                                                                                     |          |         |         |          |          |         |         |          |         |          |          |          |          |         |         |          |          |          |         |          |         |         |          |          |          |          |          |          |          |          |          |          |          |          |         |          |          |          |          |          |          |          |   |          |          |          |   |          |          |          |   |          |          |          |   |          |          |         |   |          |          |         |   |          |          |         |   |          |          |         |   |          |          |          |   |          |          |         |   |          |         |         |   |          |         |          |   |          |         |         |   |          |         |         |                                                                                                                                                                                                                       |                                                                                                                                                                                                                                                                                                                                                                                                                                                                                                                                                                                                                                                                                                                                                                                                                                                                                                                                                                                                                                                                                                                                                                                                                                                                                                                                                                                                                                                                                                                                                                                                                                                                                                                                                                                                                                                                                                                                                                                                                                                                                                                                                                                                                                                                                                                                                                                                                                                                                                         |         |          |         |          |          |         |         |          |         |          |          |          |         |          |                                                                                                                                                                                                                        |                                                                                                                                                                                                                                                                                                                                                                                                                                                                                                                                                                                                                                                                                                                                                                                                                                                                                                                                                                                                                                                                                                                                                                                                                                                                                                                                                                                                                                                                                                                                                                                                                                                                                                                                                                                                                                                                                                                                                                                                                                                                                                                                                                                                                                                                                                                                                                                                                                                                                                                                                                                                                                                                                                                                                                                                |   |          |          |          |   |         |          |          |   |          |          |          |   |          |          |          |   |          |          |         |   |          |          |         |   |          |          |          |   |          |          |          |   |          |          |          |   |         |          |         |   |          |          |         |   |          |         |          |   |          |          |          |   |          |         |          |   |          |          |         |   |          |          |          |   |          |          |         |   |          |         |          |   |          |          |          |   |          |         |          |   |          |          |          |   |          |          |          |   |          |          |          |   |          |          |          |   |          |         |         |   |          |         |         |   |         |          |          |   |          |          |          |   |          |          |          |   |          |          |          |   |          |          |         |   |          |          |         |   |         |         |          |   |         |         |          |   |         |         |          |   |         |         |          |   |          |         |          |   |          |          |         |
| C                                                                                                                                                                                                                     | -0.09384                                                                                                                                                                                                                                                                                                                                                                                                                                                                                                                                                                                                                                                                                                                                                                                                                                                                                                                                                                                                                                                                                                                                                                                                                                                                                                                                                                                                                                                                                                                                                                                                                                                                                                                                                                                                                                                                                                                                                                                                                                                                                                                                                                                                                                                                                                                                                                                                                                                                                                                                                                                                                                                                                                                                                                                     | 0.56861  | 1.85849  |          |          |   |          |         |          |   |          |          |          |   |          |          |          |   |          |         |          |   |          |          |          |   |          |          |          |   |          |          |          |   |          |         |          |   |          |          |         |   |                                                                                                                                                                                                                                                                                                                                                                                                                                                                                                                                                                                                                                                                                                                                                                     |          |         |         |          |          |         |         |          |         |          |          |          |          |         |         |          |          |          |         |          |         |         |          |          |          |          |          |          |          |          |          |          |          |          |         |          |          |          |          |          |          |          |   |          |          |          |   |          |          |          |   |          |          |          |   |          |          |         |   |          |          |         |   |          |          |         |   |          |          |         |   |          |          |          |   |          |          |         |   |          |         |         |   |          |         |          |   |          |         |         |   |          |         |         |                                                                                                                                                                                                                       |                                                                                                                                                                                                                                                                                                                                                                                                                                                                                                                                                                                                                                                                                                                                                                                                                                                                                                                                                                                                                                                                                                                                                                                                                                                                                                                                                                                                                                                                                                                                                                                                                                                                                                                                                                                                                                                                                                                                                                                                                                                                                                                                                                                                                                                                                                                                                                                                                                                                                                         |         |          |         |          |          |         |         |          |         |          |          |          |         |          |                                                                                                                                                                                                                        |                                                                                                                                                                                                                                                                                                                                                                                                                                                                                                                                                                                                                                                                                                                                                                                                                                                                                                                                                                                                                                                                                                                                                                                                                                                                                                                                                                                                                                                                                                                                                                                                                                                                                                                                                                                                                                                                                                                                                                                                                                                                                                                                                                                                                                                                                                                                                                                                                                                                                                                                                                                                                                                                                                                                                                                                |   |          |          |          |   |         |          |          |   |          |          |          |   |          |          |          |   |          |          |         |   |          |          |         |   |          |          |          |   |          |          |          |   |          |          |          |   |         |          |         |   |          |          |         |   |          |         |          |   |          |          |          |   |          |         |          |   |          |          |         |   |          |          |          |   |          |          |         |   |          |         |          |   |          |          |          |   |          |         |          |   |          |          |          |   |          |          |          |   |          |          |          |   |          |          |          |   |          |         |         |   |          |         |         |   |         |          |          |   |          |          |          |   |          |          |          |   |          |          |          |   |          |          |         |   |          |          |         |   |         |         |          |   |         |         |          |   |         |         |          |   |         |         |          |   |          |         |          |   |          |          |         |
| C                                                                                                                                                                                                                     | -2.14258                                                                                                                                                                                                                                                                                                                                                                                                                                                                                                                                                                                                                                                                                                                                                                                                                                                                                                                                                                                                                                                                                                                                                                                                                                                                                                                                                                                                                                                                                                                                                                                                                                                                                                                                                                                                                                                                                                                                                                                                                                                                                                                                                                                                                                                                                                                                                                                                                                                                                                                                                                                                                                                                                                                                                                                     | -0.58829 | 1.31083  |          |          |   |          |         |          |   |          |          |          |   |          |          |          |   |          |         |          |   |          |          |          |   |          |          |          |   |          |          |          |   |          |         |          |   |          |          |         |   |                                                                                                                                                                                                                                                                                                                                                                                                                                                                                                                                                                                                                                                                                                                                                                     |          |         |         |          |          |         |         |          |         |          |          |          |          |         |         |          |          |          |         |          |         |         |          |          |          |          |          |          |          |          |          |          |          |          |         |          |          |          |          |          |          |          |   |          |          |          |   |          |          |          |   |          |          |          |   |          |          |         |   |          |          |         |   |          |          |         |   |          |          |         |   |          |          |          |   |          |          |         |   |          |         |         |   |          |         |          |   |          |         |         |   |          |         |         |                                                                                                                                                                                                                       |                                                                                                                                                                                                                                                                                                                                                                                                                                                                                                                                                                                                                                                                                                                                                                                                                                                                                                                                                                                                                                                                                                                                                                                                                                                                                                                                                                                                                                                                                                                                                                                                                                                                                                                                                                                                                                                                                                                                                                                                                                                                                                                                                                                                                                                                                                                                                                                                                                                                                                         |         |          |         |          |          |         |         |          |         |          |          |          |         |          |                                                                                                                                                                                                                        |                                                                                                                                                                                                                                                                                                                                                                                                                                                                                                                                                                                                                                                                                                                                                                                                                                                                                                                                                                                                                                                                                                                                                                                                                                                                                                                                                                                                                                                                                                                                                                                                                                                                                                                                                                                                                                                                                                                                                                                                                                                                                                                                                                                                                                                                                                                                                                                                                                                                                                                                                                                                                                                                                                                                                                                                |   |          |          |          |   |         |          |          |   |          |          |          |   |          |          |          |   |          |          |         |   |          |          |         |   |          |          |          |   |          |          |          |   |          |          |          |   |         |          |         |   |          |          |         |   |          |         |          |   |          |          |          |   |          |         |          |   |          |          |         |   |          |          |          |   |          |          |         |   |          |         |          |   |          |          |          |   |          |         |          |   |          |          |          |   |          |          |          |   |          |          |          |   |          |          |          |   |          |         |         |   |          |         |         |   |         |          |          |   |          |          |          |   |          |          |          |   |          |          |          |   |          |          |         |   |          |          |         |   |         |         |          |   |         |         |          |   |         |         |          |   |         |         |          |   |          |         |          |   |          |          |         |
| C                                                                                                                                                                                                                     | -2.17535                                                                                                                                                                                                                                                                                                                                                                                                                                                                                                                                                                                                                                                                                                                                                                                                                                                                                                                                                                                                                                                                                                                                                                                                                                                                                                                                                                                                                                                                                                                                                                                                                                                                                                                                                                                                                                                                                                                                                                                                                                                                                                                                                                                                                                                                                                                                                                                                                                                                                                                                                                                                                                                                                                                                                                                     | -1.17587 | 2.57073  |          |          |   |          |         |          |   |          |          |          |   |          |          |          |   |          |         |          |   |          |          |          |   |          |          |          |   |          |          |          |   |          |         |          |   |          |          |         |   |                                                                                                                                                                                                                                                                                                                                                                                                                                                                                                                                                                                                                                                                                                                                                                     |          |         |         |          |          |         |         |          |         |          |          |          |          |         |         |          |          |          |         |          |         |         |          |          |          |          |          |          |          |          |          |          |          |          |         |          |          |          |          |          |          |          |   |          |          |          |   |          |          |          |   |          |          |          |   |          |          |         |   |          |          |         |   |          |          |         |   |          |          |         |   |          |          |          |   |          |          |         |   |          |         |         |   |          |         |          |   |          |         |         |   |          |         |         |                                                                                                                                                                                                                       |                                                                                                                                                                                                                                                                                                                                                                                                                                                                                                                                                                                                                                                                                                                                                                                                                                                                                                                                                                                                                                                                                                                                                                                                                                                                                                                                                                                                                                                                                                                                                                                                                                                                                                                                                                                                                                                                                                                                                                                                                                                                                                                                                                                                                                                                                                                                                                                                                                                                                                         |         |          |         |          |          |         |         |          |         |          |          |          |         |          |                                                                                                                                                                                                                        |                                                                                                                                                                                                                                                                                                                                                                                                                                                                                                                                                                                                                                                                                                                                                                                                                                                                                                                                                                                                                                                                                                                                                                                                                                                                                                                                                                                                                                                                                                                                                                                                                                                                                                                                                                                                                                                                                                                                                                                                                                                                                                                                                                                                                                                                                                                                                                                                                                                                                                                                                                                                                                                                                                                                                                                                |   |          |          |          |   |         |          |          |   |          |          |          |   |          |          |          |   |          |          |         |   |          |          |         |   |          |          |          |   |          |          |          |   |          |          |          |   |         |          |         |   |          |          |         |   |          |         |          |   |          |          |          |   |          |         |          |   |          |          |         |   |          |          |          |   |          |          |         |   |          |         |          |   |          |          |          |   |          |         |          |   |          |          |          |   |          |          |          |   |          |          |          |   |          |          |          |   |          |         |         |   |          |         |         |   |         |          |          |   |          |          |          |   |          |          |          |   |          |          |          |   |          |          |         |   |          |          |         |   |         |         |          |   |         |         |          |   |         |         |          |   |         |         |          |   |          |         |          |   |          |          |         |
| C                                                                                                                                                                                                                     | -0.15270                                                                                                                                                                                                                                                                                                                                                                                                                                                                                                                                                                                                                                                                                                                                                                                                                                                                                                                                                                                                                                                                                                                                                                                                                                                                                                                                                                                                                                                                                                                                                                                                                                                                                                                                                                                                                                                                                                                                                                                                                                                                                                                                                                                                                                                                                                                                                                                                                                                                                                                                                                                                                                                                                                                                                                                     | -0.01243 | 3.13055  |          |          |   |          |         |          |   |          |          |          |   |          |          |          |   |          |         |          |   |          |          |          |   |          |          |          |   |          |          |          |   |          |         |          |   |          |          |         |   |                                                                                                                                                                                                                                                                                                                                                                                                                                                                                                                                                                                                                                                                                                                                                                     |          |         |         |          |          |         |         |          |         |          |          |          |          |         |         |          |          |          |         |          |         |         |          |          |          |          |          |          |          |          |          |          |          |          |         |          |          |          |          |          |          |          |   |          |          |          |   |          |          |          |   |          |          |          |   |          |          |         |   |          |          |         |   |          |          |         |   |          |          |         |   |          |          |          |   |          |          |         |   |          |         |         |   |          |         |          |   |          |         |         |   |          |         |         |                                                                                                                                                                                                                       |                                                                                                                                                                                                                                                                                                                                                                                                                                                                                                                                                                                                                                                                                                                                                                                                                                                                                                                                                                                                                                                                                                                                                                                                                                                                                                                                                                                                                                                                                                                                                                                                                                                                                                                                                                                                                                                                                                                                                                                                                                                                                                                                                                                                                                                                                                                                                                                                                                                                                                         |         |          |         |          |          |         |         |          |         |          |          |          |         |          |                                                                                                                                                                                                                        |                                                                                                                                                                                                                                                                                                                                                                                                                                                                                                                                                                                                                                                                                                                                                                                                                                                                                                                                                                                                                                                                                                                                                                                                                                                                                                                                                                                                                                                                                                                                                                                                                                                                                                                                                                                                                                                                                                                                                                                                                                                                                                                                                                                                                                                                                                                                                                                                                                                                                                                                                                                                                                                                                                                                                                                                |   |          |          |          |   |         |          |          |   |          |          |          |   |          |          |          |   |          |          |         |   |          |          |         |   |          |          |          |   |          |          |          |   |          |          |          |   |         |          |         |   |          |          |         |   |          |         |          |   |          |          |          |   |          |         |          |   |          |          |         |   |          |          |          |   |          |          |         |   |          |         |          |   |          |          |          |   |          |         |          |   |          |          |          |   |          |          |          |   |          |          |          |   |          |          |          |   |          |         |         |   |          |         |         |   |         |          |          |   |          |          |          |   |          |          |          |   |          |          |          |   |          |          |         |   |          |          |         |   |         |         |          |   |         |         |          |   |         |         |          |   |         |         |          |   |          |         |          |   |          |          |         |
| H                                                                                                                                                                                                                     | -0.95702                                                                                                                                                                                                                                                                                                                                                                                                                                                                                                                                                                                                                                                                                                                                                                                                                                                                                                                                                                                                                                                                                                                                                                                                                                                                                                                                                                                                                                                                                                                                                                                                                                                                                                                                                                                                                                                                                                                                                                                                                                                                                                                                                                                                                                                                                                                                                                                                                                                                                                                                                                                                                                                                                                                                                                                     | 2.37228  | -4.04840 |          |          |   |          |         |          |   |          |          |          |   |          |          |          |   |          |         |          |   |          |          |          |   |          |          |          |   |          |          |          |   |          |         |          |   |          |          |         |   |                                                                                                                                                                                                                                                                                                                                                                                                                                                                                                                                                                                                                                                                                                                                                                     |          |         |         |          |          |         |         |          |         |          |          |          |          |         |         |          |          |          |         |          |         |         |          |          |          |          |          |          |          |          |          |          |          |          |         |          |          |          |          |          |          |          |   |          |          |          |   |          |          |          |   |          |          |          |   |          |          |         |   |          |          |         |   |          |          |         |   |          |          |         |   |          |          |          |   |          |          |         |   |          |         |         |   |          |         |          |   |          |         |         |   |          |         |         |                                                                                                                                                                                                                       |                                                                                                                                                                                                                                                                                                                                                                                                                                                                                                                                                                                                                                                                                                                                                                                                                                                                                                                                                                                                                                                                                                                                                                                                                                                                                                                                                                                                                                                                                                                                                                                                                                                                                                                                                                                                                                                                                                                                                                                                                                                                                                                                                                                                                                                                                                                                                                                                                                                                                                         |         |          |         |          |          |         |         |          |         |          |          |          |         |          |                                                                                                                                                                                                                        |                                                                                                                                                                                                                                                                                                                                                                                                                                                                                                                                                                                                                                                                                                                                                                                                                                                                                                                                                                                                                                                                                                                                                                                                                                                                                                                                                                                                                                                                                                                                                                                                                                                                                                                                                                                                                                                                                                                                                                                                                                                                                                                                                                                                                                                                                                                                                                                                                                                                                                                                                                                                                                                                                                                                                                                                |   |          |          |          |   |         |          |          |   |          |          |          |   |          |          |          |   |          |          |         |   |          |          |         |   |          |          |          |   |          |          |          |   |          |          |          |   |         |          |         |   |          |          |         |   |          |         |          |   |          |          |          |   |          |         |          |   |          |          |         |   |          |          |          |   |          |          |         |   |          |         |          |   |          |          |          |   |          |         |          |   |          |          |          |   |          |          |          |   |          |          |          |   |          |          |          |   |          |         |         |   |          |         |         |   |         |          |          |   |          |          |          |   |          |          |          |   |          |          |          |   |          |          |         |   |          |          |         |   |         |         |          |   |         |         |          |   |         |         |          |   |         |         |          |   |          |         |          |   |          |          |         |
| H                                                                                                                                                                                                                     | -1.17462                                                                                                                                                                                                                                                                                                                                                                                                                                                                                                                                                                                                                                                                                                                                                                                                                                                                                                                                                                                                                                                                                                                                                                                                                                                                                                                                                                                                                                                                                                                                                                                                                                                                                                                                                                                                                                                                                                                                                                                                                                                                                                                                                                                                                                                                                                                                                                                                                                                                                                                                                                                                                                                                                                                                                                                     | -1.35409 | 4.46539  |          |          |   |          |         |          |   |          |          |          |   |          |          |          |   |          |         |          |   |          |          |          |   |          |          |          |   |          |          |          |   |          |         |          |   |          |          |         |   |                                                                                                                                                                                                                                                                                                                                                                                                                                                                                                                                                                                                                                                                                                                                                                     |          |         |         |          |          |         |         |          |         |          |          |          |          |         |         |          |          |          |         |          |         |         |          |          |          |          |          |          |          |          |          |          |          |          |         |          |          |          |          |          |          |          |   |          |          |          |   |          |          |          |   |          |          |          |   |          |          |         |   |          |          |         |   |          |          |         |   |          |          |         |   |          |          |          |   |          |          |         |   |          |         |         |   |          |         |          |   |          |         |         |   |          |         |         |                                                                                                                                                                                                                       |                                                                                                                                                                                                                                                                                                                                                                                                                                                                                                                                                                                                                                                                                                                                                                                                                                                                                                                                                                                                                                                                                                                                                                                                                                                                                                                                                                                                                                                                                                                                                                                                                                                                                                                                                                                                                                                                                                                                                                                                                                                                                                                                                                                                                                                                                                                                                                                                                                                                                                         |         |          |         |          |          |         |         |          |         |          |          |          |         |          |                                                                                                                                                                                                                        |                                                                                                                                                                                                                                                                                                                                                                                                                                                                                                                                                                                                                                                                                                                                                                                                                                                                                                                                                                                                                                                                                                                                                                                                                                                                                                                                                                                                                                                                                                                                                                                                                                                                                                                                                                                                                                                                                                                                                                                                                                                                                                                                                                                                                                                                                                                                                                                                                                                                                                                                                                                                                                                                                                                                                                                                |   |          |          |          |   |         |          |          |   |          |          |          |   |          |          |          |   |          |          |         |   |          |          |         |   |          |          |          |   |          |          |          |   |          |          |          |   |         |          |         |   |          |          |         |   |          |         |          |   |          |          |          |   |          |         |          |   |          |          |         |   |          |          |          |   |          |          |         |   |          |         |          |   |          |          |          |   |          |         |          |   |          |          |          |   |          |          |          |   |          |          |          |   |          |          |          |   |          |         |         |   |          |         |         |   |         |          |          |   |          |          |          |   |          |          |          |   |          |          |          |   |          |          |         |   |          |          |         |   |         |         |          |   |         |         |          |   |         |         |          |   |         |         |          |   |          |         |          |   |          |          |         |
| H                                                                                                                                                                                                                     | -0.91273                                                                                                                                                                                                                                                                                                                                                                                                                                                                                                                                                                                                                                                                                                                                                                                                                                                                                                                                                                                                                                                                                                                                                                                                                                                                                                                                                                                                                                                                                                                                                                                                                                                                                                                                                                                                                                                                                                                                                                                                                                                                                                                                                                                                                                                                                                                                                                                                                                                                                                                                                                                                                                                                                                                                                                                     | 3.83342  | -2.03110 |          |          |   |          |         |          |   |          |          |          |   |          |          |          |   |          |         |          |   |          |          |          |   |          |          |          |   |          |          |          |   |          |         |          |   |          |          |         |   |                                                                                                                                                                                                                                                                                                                                                                                                                                                                                                                                                                                                                                                                                                                                                                     |          |         |         |          |          |         |         |          |         |          |          |          |          |         |         |          |          |          |         |          |         |         |          |          |          |          |          |          |          |          |          |          |          |          |         |          |          |          |          |          |          |          |   |          |          |          |   |          |          |          |   |          |          |          |   |          |          |         |   |          |          |         |   |          |          |         |   |          |          |         |   |          |          |          |   |          |          |         |   |          |         |         |   |          |         |          |   |          |         |         |   |          |         |         |                                                                                                                                                                                                                       |                                                                                                                                                                                                                                                                                                                                                                                                                                                                                                                                                                                                                                                                                                                                                                                                                                                                                                                                                                                                                                                                                                                                                                                                                                                                                                                                                                                                                                                                                                                                                                                                                                                                                                                                                                                                                                                                                                                                                                                                                                                                                                                                                                                                                                                                                                                                                                                                                                                                                                         |         |          |         |          |          |         |         |          |         |          |          |          |         |          |                                                                                                                                                                                                                        |                                                                                                                                                                                                                                                                                                                                                                                                                                                                                                                                                                                                                                                                                                                                                                                                                                                                                                                                                                                                                                                                                                                                                                                                                                                                                                                                                                                                                                                                                                                                                                                                                                                                                                                                                                                                                                                                                                                                                                                                                                                                                                                                                                                                                                                                                                                                                                                                                                                                                                                                                                                                                                                                                                                                                                                                |   |          |          |          |   |         |          |          |   |          |          |          |   |          |          |          |   |          |          |         |   |          |          |         |   |          |          |          |   |          |          |          |   |          |          |          |   |         |          |         |   |          |          |         |   |          |         |          |   |          |          |          |   |          |         |          |   |          |          |         |   |          |          |          |   |          |          |         |   |          |         |          |   |          |          |          |   |          |         |          |   |          |          |          |   |          |          |          |   |          |          |          |   |          |          |          |   |          |         |         |   |          |         |         |   |         |          |          |   |          |          |          |   |          |          |          |   |          |          |          |   |          |          |         |   |          |          |         |   |         |         |          |   |         |         |          |   |         |         |          |   |         |         |          |   |          |         |          |   |          |          |         |
| H                                                                                                                                                                                                                     | 0.61532                                                                                                                                                                                                                                                                                                                                                                                                                                                                                                                                                                                                                                                                                                                                                                                                                                                                                                                                                                                                                                                                                                                                                                                                                                                                                                                                                                                                                                                                                                                                                                                                                                                                                                                                                                                                                                                                                                                                                                                                                                                                                                                                                                                                                                                                                                                                                                                                                                                                                                                                                                                                                                                                                                                                                                                      | 0.26989  | 3.83836  |          |          |   |          |         |          |   |          |          |          |   |          |          |          |   |          |         |          |   |          |          |          |   |          |          |          |   |          |          |          |   |          |         |          |   |          |          |         |   |                                                                                                                                                                                                                                                                                                                                                                                                                                                                                                                                                                                                                                                                                                                                                                     |          |         |         |          |          |         |         |          |         |          |          |          |          |         |         |          |          |          |         |          |         |         |          |          |          |          |          |          |          |          |          |          |          |          |         |          |          |          |          |          |          |          |   |          |          |          |   |          |          |          |   |          |          |          |   |          |          |         |   |          |          |         |   |          |          |         |   |          |          |         |   |          |          |          |   |          |          |         |   |          |         |         |   |          |         |          |   |          |         |         |   |          |         |         |                                                                                                                                                                                                                       |                                                                                                                                                                                                                                                                                                                                                                                                                                                                                                                                                                                                                                                                                                                                                                                                                                                                                                                                                                                                                                                                                                                                                                                                                                                                                                                                                                                                                                                                                                                                                                                                                                                                                                                                                                                                                                                                                                                                                                                                                                                                                                                                                                                                                                                                                                                                                                                                                                                                                                         |         |          |         |          |          |         |         |          |         |          |          |          |         |          |                                                                                                                                                                                                                        |                                                                                                                                                                                                                                                                                                                                                                                                                                                                                                                                                                                                                                                                                                                                                                                                                                                                                                                                                                                                                                                                                                                                                                                                                                                                                                                                                                                                                                                                                                                                                                                                                                                                                                                                                                                                                                                                                                                                                                                                                                                                                                                                                                                                                                                                                                                                                                                                                                                                                                                                                                                                                                                                                                                                                                                                |   |          |          |          |   |         |          |          |   |          |          |          |   |          |          |          |   |          |          |         |   |          |          |         |   |          |          |          |   |          |          |          |   |          |          |          |   |         |          |         |   |          |          |         |   |          |         |          |   |          |          |          |   |          |         |          |   |          |          |         |   |          |          |          |   |          |          |         |   |          |         |          |   |          |          |          |   |          |         |          |   |          |          |          |   |          |          |          |   |          |          |          |   |          |          |          |   |          |         |         |   |          |         |         |   |         |          |          |   |          |          |          |   |          |          |          |   |          |          |          |   |          |          |         |   |          |          |         |   |         |         |          |   |         |         |          |   |         |         |          |   |         |         |          |   |          |         |          |   |          |          |         |
| H                                                                                                                                                                                                                     | -1.21820                                                                                                                                                                                                                                                                                                                                                                                                                                                                                                                                                                                                                                                                                                                                                                                                                                                                                                                                                                                                                                                                                                                                                                                                                                                                                                                                                                                                                                                                                                                                                                                                                                                                                                                                                                                                                                                                                                                                                                                                                                                                                                                                                                                                                                                                                                                                                                                                                                                                                                                                                                                                                                                                                                                                                                                     | -0.09294 | -3.75076 |          |          |   |          |         |          |   |          |          |          |   |          |          |          |   |          |         |          |   |          |          |          |   |          |          |          |   |          |          |          |   |          |         |          |   |          |          |         |   |                                                                                                                                                                                                                                                                                                                                                                                                                                                                                                                                                                                                                                                                                                                                                                     |          |         |         |          |          |         |         |          |         |          |          |          |          |         |         |          |          |          |         |          |         |         |          |          |          |          |          |          |          |          |          |          |          |          |         |          |          |          |          |          |          |          |   |          |          |          |   |          |          |          |   |          |          |          |   |          |          |         |   |          |          |         |   |          |          |         |   |          |          |         |   |          |          |          |   |          |          |         |   |          |         |         |   |          |         |          |   |          |         |         |   |          |         |         |                                                                                                                                                                                                                       |                                                                                                                                                                                                                                                                                                                                                                                                                                                                                                                                                                                                                                                                                                                                                                                                                                                                                                                                                                                                                                                                                                                                                                                                                                                                                                                                                                                                                                                                                                                                                                                                                                                                                                                                                                                                                                                                                                                                                                                                                                                                                                                                                                                                                                                                                                                                                                                                                                                                                                         |         |          |         |          |          |         |         |          |         |          |          |          |         |          |                                                                                                                                                                                                                        |                                                                                                                                                                                                                                                                                                                                                                                                                                                                                                                                                                                                                                                                                                                                                                                                                                                                                                                                                                                                                                                                                                                                                                                                                                                                                                                                                                                                                                                                                                                                                                                                                                                                                                                                                                                                                                                                                                                                                                                                                                                                                                                                                                                                                                                                                                                                                                                                                                                                                                                                                                                                                                                                                                                                                                                                |   |          |          |          |   |         |          |          |   |          |          |          |   |          |          |          |   |          |          |         |   |          |          |         |   |          |          |          |   |          |          |          |   |          |          |          |   |         |          |         |   |          |          |         |   |          |         |          |   |          |          |          |   |          |         |          |   |          |          |         |   |          |          |          |   |          |          |         |   |          |         |          |   |          |          |          |   |          |         |          |   |          |          |          |   |          |          |          |   |          |          |          |   |          |          |          |   |          |         |         |   |          |         |         |   |         |          |          |   |          |          |          |   |          |          |          |   |          |          |          |   |          |          |         |   |          |          |         |   |         |         |          |   |         |         |          |   |         |         |          |   |         |         |          |   |          |         |          |   |          |          |         |
| H                                                                                                                                                                                                                     | -2.98891                                                                                                                                                                                                                                                                                                                                                                                                                                                                                                                                                                                                                                                                                                                                                                                                                                                                                                                                                                                                                                                                                                                                                                                                                                                                                                                                                                                                                                                                                                                                                                                                                                                                                                                                                                                                                                                                                                                                                                                                                                                                                                                                                                                                                                                                                                                                                                                                                                                                                                                                                                                                                                                                                                                                                                                     | -1.84154 | 2.82909  |          |          |   |          |         |          |   |          |          |          |   |          |          |          |   |          |         |          |   |          |          |          |   |          |          |          |   |          |          |          |   |          |         |          |   |          |          |         |   |                                                                                                                                                                                                                                                                                                                                                                                                                                                                                                                                                                                                                                                                                                                                                                     |          |         |         |          |          |         |         |          |         |          |          |          |          |         |         |          |          |          |         |          |         |         |          |          |          |          |          |          |          |          |          |          |          |          |         |          |          |          |          |          |          |          |   |          |          |          |   |          |          |          |   |          |          |          |   |          |          |         |   |          |          |         |   |          |          |         |   |          |          |         |   |          |          |          |   |          |          |         |   |          |         |         |   |          |         |          |   |          |         |         |   |          |         |         |                                                                                                                                                                                                                       |                                                                                                                                                                                                                                                                                                                                                                                                                                                                                                                                                                                                                                                                                                                                                                                                                                                                                                                                                                                                                                                                                                                                                                                                                                                                                                                                                                                                                                                                                                                                                                                                                                                                                                                                                                                                                                                                                                                                                                                                                                                                                                                                                                                                                                                                                                                                                                                                                                                                                                         |         |          |         |          |          |         |         |          |         |          |          |          |         |          |                                                                                                                                                                                                                        |                                                                                                                                                                                                                                                                                                                                                                                                                                                                                                                                                                                                                                                                                                                                                                                                                                                                                                                                                                                                                                                                                                                                                                                                                                                                                                                                                                                                                                                                                                                                                                                                                                                                                                                                                                                                                                                                                                                                                                                                                                                                                                                                                                                                                                                                                                                                                                                                                                                                                                                                                                                                                                                                                                                                                                                                |   |          |          |          |   |         |          |          |   |          |          |          |   |          |          |          |   |          |          |         |   |          |          |         |   |          |          |          |   |          |          |          |   |          |          |          |   |         |          |         |   |          |          |         |   |          |         |          |   |          |          |          |   |          |         |          |   |          |          |         |   |          |          |          |   |          |          |         |   |          |         |          |   |          |          |          |   |          |         |          |   |          |          |          |   |          |          |          |   |          |          |          |   |          |          |          |   |          |         |         |   |          |         |         |   |         |          |          |   |          |          |          |   |          |          |          |   |          |          |          |   |          |          |         |   |          |          |         |   |         |         |          |   |         |         |          |   |         |         |          |   |         |         |          |   |          |         |          |   |          |          |         |
| C                                                                                                                                                                                                                     | -1.31534                                                                                                                                                                                                                                                                                                                                                                                                                                                                                                                                                                                                                                                                                                                                                                                                                                                                                                                                                                                                                                                                                                                                                                                                                                                                                                                                                                                                                                                                                                                                                                                                                                                                                                                                                                                                                                                                                                                                                                                                                                                                                                                                                                                                                                                                                                                                                                                                                                                                                                                                                                                                                                                                                                                                                                                     | -1.56931 | -1.60206 |          |          |   |          |         |          |   |          |          |          |   |          |          |          |   |          |         |          |   |          |          |          |   |          |          |          |   |          |          |          |   |          |         |          |   |          |          |         |   |                                                                                                                                                                                                                                                                                                                                                                                                                                                                                                                                                                                                                                                                                                                                                                     |          |         |         |          |          |         |         |          |         |          |          |          |          |         |         |          |          |          |         |          |         |         |          |          |          |          |          |          |          |          |          |          |          |          |         |          |          |          |          |          |          |          |   |          |          |          |   |          |          |          |   |          |          |          |   |          |          |         |   |          |          |         |   |          |          |         |   |          |          |         |   |          |          |          |   |          |          |         |   |          |         |         |   |          |         |          |   |          |         |         |   |          |         |         |                                                                                                                                                                                                                       |                                                                                                                                                                                                                                                                                                                                                                                                                                                                                                                                                                                                                                                                                                                                                                                                                                                                                                                                                                                                                                                                                                                                                                                                                                                                                                                                                                                                                                                                                                                                                                                                                                                                                                                                                                                                                                                                                                                                                                                                                                                                                                                                                                                                                                                                                                                                                                                                                                                                                                         |         |          |         |          |          |         |         |          |         |          |          |          |         |          |                                                                                                                                                                                                                        |                                                                                                                                                                                                                                                                                                                                                                                                                                                                                                                                                                                                                                                                                                                                                                                                                                                                                                                                                                                                                                                                                                                                                                                                                                                                                                                                                                                                                                                                                                                                                                                                                                                                                                                                                                                                                                                                                                                                                                                                                                                                                                                                                                                                                                                                                                                                                                                                                                                                                                                                                                                                                                                                                                                                                                                                |   |          |          |          |   |         |          |          |   |          |          |          |   |          |          |          |   |          |          |         |   |          |          |         |   |          |          |          |   |          |          |          |   |          |          |          |   |         |          |         |   |          |          |         |   |          |         |          |   |          |          |          |   |          |         |          |   |          |          |         |   |          |          |          |   |          |          |         |   |          |         |          |   |          |          |          |   |          |         |          |   |          |          |          |   |          |          |          |   |          |          |          |   |          |          |          |   |          |         |         |   |          |         |         |   |         |          |          |   |          |          |          |   |          |          |          |   |          |          |          |   |          |          |         |   |          |          |         |   |         |         |          |   |         |         |          |   |         |         |          |   |         |         |          |   |          |         |          |   |          |          |         |
| O                                                                                                                                                                                                                     | -0.67772                                                                                                                                                                                                                                                                                                                                                                                                                                                                                                                                                                                                                                                                                                                                                                                                                                                                                                                                                                                                                                                                                                                                                                                                                                                                                                                                                                                                                                                                                                                                                                                                                                                                                                                                                                                                                                                                                                                                                                                                                                                                                                                                                                                                                                                                                                                                                                                                                                                                                                                                                                                                                                                                                                                                                                                     | -2.19488 | -0.72998 |          |          |   |          |         |          |   |          |          |          |   |          |          |          |   |          |         |          |   |          |          |          |   |          |          |          |   |          |          |          |   |          |         |          |   |          |          |         |   |                                                                                                                                                                                                                                                                                                                                                                                                                                                                                                                                                                                                                                                                                                                                                                     |          |         |         |          |          |         |         |          |         |          |          |          |          |         |         |          |          |          |         |          |         |         |          |          |          |          |          |          |          |          |          |          |          |          |         |          |          |          |          |          |          |          |   |          |          |          |   |          |          |          |   |          |          |          |   |          |          |         |   |          |          |         |   |          |          |         |   |          |          |         |   |          |          |          |   |          |          |         |   |          |         |         |   |          |         |          |   |          |         |         |   |          |         |         |                                                                                                                                                                                                                       |                                                                                                                                                                                                                                                                                                                                                                                                                                                                                                                                                                                                                                                                                                                                                                                                                                                                                                                                                                                                                                                                                                                                                                                                                                                                                                                                                                                                                                                                                                                                                                                                                                                                                                                                                                                                                                                                                                                                                                                                                                                                                                                                                                                                                                                                                                                                                                                                                                                                                                         |         |          |         |          |          |         |         |          |         |          |          |          |         |          |                                                                                                                                                                                                                        |                                                                                                                                                                                                                                                                                                                                                                                                                                                                                                                                                                                                                                                                                                                                                                                                                                                                                                                                                                                                                                                                                                                                                                                                                                                                                                                                                                                                                                                                                                                                                                                                                                                                                                                                                                                                                                                                                                                                                                                                                                                                                                                                                                                                                                                                                                                                                                                                                                                                                                                                                                                                                                                                                                                                                                                                |   |          |          |          |   |         |          |          |   |          |          |          |   |          |          |          |   |          |          |         |   |          |          |         |   |          |          |          |   |          |          |          |   |          |          |          |   |         |          |         |   |          |          |         |   |          |         |          |   |          |          |          |   |          |         |          |   |          |          |         |   |          |          |          |   |          |          |         |   |          |         |          |   |          |          |          |   |          |         |          |   |          |          |          |   |          |          |          |   |          |          |          |   |          |          |          |   |          |         |         |   |          |         |         |   |         |          |          |   |          |          |          |   |          |          |          |   |          |          |          |   |          |          |         |   |          |          |         |   |         |         |          |   |         |         |          |   |         |         |          |   |         |         |          |   |          |         |          |   |          |          |         |
| O                                                                                                                                                                                                                     | -2.08110                                                                                                                                                                                                                                                                                                                                                                                                                                                                                                                                                                                                                                                                                                                                                                                                                                                                                                                                                                                                                                                                                                                                                                                                                                                                                                                                                                                                                                                                                                                                                                                                                                                                                                                                                                                                                                                                                                                                                                                                                                                                                                                                                                                                                                                                                                                                                                                                                                                                                                                                                                                                                                                                                                                                                                                     | -2.03975 | -2.48322 |          |          |   |          |         |          |   |          |          |          |   |          |          |          |   |          |         |          |   |          |          |          |   |          |          |          |   |          |          |          |   |          |         |          |   |          |          |         |   |                                                                                                                                                                                                                                                                                                                                                                                                                                                                                                                                                                                                                                                                                                                                                                     |          |         |         |          |          |         |         |          |         |          |          |          |          |         |         |          |          |          |         |          |         |         |          |          |          |          |          |          |          |          |          |          |          |          |         |          |          |          |          |          |          |          |   |          |          |          |   |          |          |          |   |          |          |          |   |          |          |         |   |          |          |         |   |          |          |         |   |          |          |         |   |          |          |          |   |          |          |         |   |          |         |         |   |          |         |          |   |          |         |         |   |          |         |         |                                                                                                                                                                                                                       |                                                                                                                                                                                                                                                                                                                                                                                                                                                                                                                                                                                                                                                                                                                                                                                                                                                                                                                                                                                                                                                                                                                                                                                                                                                                                                                                                                                                                                                                                                                                                                                                                                                                                                                                                                                                                                                                                                                                                                                                                                                                                                                                                                                                                                                                                                                                                                                                                                                                                                         |         |          |         |          |          |         |         |          |         |          |          |          |         |          |                                                                                                                                                                                                                        |                                                                                                                                                                                                                                                                                                                                                                                                                                                                                                                                                                                                                                                                                                                                                                                                                                                                                                                                                                                                                                                                                                                                                                                                                                                                                                                                                                                                                                                                                                                                                                                                                                                                                                                                                                                                                                                                                                                                                                                                                                                                                                                                                                                                                                                                                                                                                                                                                                                                                                                                                                                                                                                                                                                                                                                                |   |          |          |          |   |         |          |          |   |          |          |          |   |          |          |          |   |          |          |         |   |          |          |         |   |          |          |          |   |          |          |          |   |          |          |          |   |         |          |         |   |          |          |         |   |          |         |          |   |          |          |          |   |          |         |          |   |          |          |         |   |          |          |          |   |          |          |         |   |          |         |          |   |          |          |          |   |          |         |          |   |          |          |          |   |          |          |          |   |          |          |          |   |          |          |          |   |          |         |         |   |          |         |         |   |         |          |          |   |          |          |          |   |          |          |          |   |          |          |          |   |          |          |         |   |          |          |         |   |         |         |          |   |         |         |          |   |         |         |          |   |         |         |          |   |          |         |          |   |          |          |         |
| C                                                                                                                                                                                                                     | 1.08714                                                                                                                                                                                                                                                                                                                                                                                                                                                                                                                                                                                                                                                                                                                                                                                                                                                                                                                                                                                                                                                                                                                                                                                                                                                                                                                                                                                                                                                                                                                                                                                                                                                                                                                                                                                                                                                                                                                                                                                                                                                                                                                                                                                                                                                                                                                                                                                                                                                                                                                                                                                                                                                                                                                                                                                      | 1.53999  | 1.60927  |          |          |   |          |         |          |   |          |          |          |   |          |          |          |   |          |         |          |   |          |          |          |   |          |          |          |   |          |          |          |   |          |         |          |   |          |          |         |   |                                                                                                                                                                                                                                                                                                                                                                                                                                                                                                                                                                                                                                                                                                                                                                     |          |         |         |          |          |         |         |          |         |          |          |          |          |         |         |          |          |          |         |          |         |         |          |          |          |          |          |          |          |          |          |          |          |          |         |          |          |          |          |          |          |          |   |          |          |          |   |          |          |          |   |          |          |          |   |          |          |         |   |          |          |         |   |          |          |         |   |          |          |         |   |          |          |          |   |          |          |         |   |          |         |         |   |          |         |          |   |          |         |         |   |          |         |         |                                                                                                                                                                                                                       |                                                                                                                                                                                                                                                                                                                                                                                                                                                                                                                                                                                                                                                                                                                                                                                                                                                                                                                                                                                                                                                                                                                                                                                                                                                                                                                                                                                                                                                                                                                                                                                                                                                                                                                                                                                                                                                                                                                                                                                                                                                                                                                                                                                                                                                                                                                                                                                                                                                                                                         |         |          |         |          |          |         |         |          |         |          |          |          |         |          |                                                                                                                                                                                                                        |                                                                                                                                                                                                                                                                                                                                                                                                                                                                                                                                                                                                                                                                                                                                                                                                                                                                                                                                                                                                                                                                                                                                                                                                                                                                                                                                                                                                                                                                                                                                                                                                                                                                                                                                                                                                                                                                                                                                                                                                                                                                                                                                                                                                                                                                                                                                                                                                                                                                                                                                                                                                                                                                                                                                                                                                |   |          |          |          |   |         |          |          |   |          |          |          |   |          |          |          |   |          |          |         |   |          |          |         |   |          |          |          |   |          |          |          |   |          |          |          |   |         |          |         |   |          |          |         |   |          |         |          |   |          |          |          |   |          |         |          |   |          |          |         |   |          |          |          |   |          |          |         |   |          |         |          |   |          |          |          |   |          |         |          |   |          |          |          |   |          |          |          |   |          |          |          |   |          |          |          |   |          |         |         |   |          |         |         |   |         |          |          |   |          |          |          |   |          |          |          |   |          |          |          |   |          |          |         |   |          |          |         |   |         |         |          |   |         |         |          |   |         |         |          |   |         |         |          |   |          |         |          |   |          |          |         |
| O                                                                                                                                                                                                                     | 1.38382                                                                                                                                                                                                                                                                                                                                                                                                                                                                                                                                                                                                                                                                                                                                                                                                                                                                                                                                                                                                                                                                                                                                                                                                                                                                                                                                                                                                                                                                                                                                                                                                                                                                                                                                                                                                                                                                                                                                                                                                                                                                                                                                                                                                                                                                                                                                                                                                                                                                                                                                                                                                                                                                                                                                                                                      | 2.26780  | 2.59230  |          |          |   |          |         |          |   |          |          |          |   |          |          |          |   |          |         |          |   |          |          |          |   |          |          |          |   |          |          |          |   |          |         |          |   |          |          |         |   |                                                                                                                                                                                                                                                                                                                                                                                                                                                                                                                                                                                                                                                                                                                                                                     |          |         |         |          |          |         |         |          |         |          |          |          |          |         |         |          |          |          |         |          |         |         |          |          |          |          |          |          |          |          |          |          |          |          |         |          |          |          |          |          |          |          |   |          |          |          |   |          |          |          |   |          |          |          |   |          |          |         |   |          |          |         |   |          |          |         |   |          |          |         |   |          |          |          |   |          |          |         |   |          |         |         |   |          |         |          |   |          |         |         |   |          |         |         |                                                                                                                                                                                                                       |                                                                                                                                                                                                                                                                                                                                                                                                                                                                                                                                                                                                                                                                                                                                                                                                                                                                                                                                                                                                                                                                                                                                                                                                                                                                                                                                                                                                                                                                                                                                                                                                                                                                                                                                                                                                                                                                                                                                                                                                                                                                                                                                                                                                                                                                                                                                                                                                                                                                                                         |         |          |         |          |          |         |         |          |         |          |          |          |         |          |                                                                                                                                                                                                                        |                                                                                                                                                                                                                                                                                                                                                                                                                                                                                                                                                                                                                                                                                                                                                                                                                                                                                                                                                                                                                                                                                                                                                                                                                                                                                                                                                                                                                                                                                                                                                                                                                                                                                                                                                                                                                                                                                                                                                                                                                                                                                                                                                                                                                                                                                                                                                                                                                                                                                                                                                                                                                                                                                                                                                                                                |   |          |          |          |   |         |          |          |   |          |          |          |   |          |          |          |   |          |          |         |   |          |          |         |   |          |          |          |   |          |          |          |   |          |          |          |   |         |          |         |   |          |          |         |   |          |         |          |   |          |          |          |   |          |         |          |   |          |          |         |   |          |          |          |   |          |          |         |   |          |         |          |   |          |          |          |   |          |         |          |   |          |          |          |   |          |          |          |   |          |          |          |   |          |          |          |   |          |         |         |   |          |         |         |   |         |          |          |   |          |          |          |   |          |          |          |   |          |          |          |   |          |          |         |   |          |          |         |   |         |         |          |   |         |         |          |   |         |         |          |   |         |         |          |   |          |         |          |   |          |          |         |
| O                                                                                                                                                                                                                     | 1.62589                                                                                                                                                                                                                                                                                                                                                                                                                                                                                                                                                                                                                                                                                                                                                                                                                                                                                                                                                                                                                                                                                                                                                                                                                                                                                                                                                                                                                                                                                                                                                                                                                                                                                                                                                                                                                                                                                                                                                                                                                                                                                                                                                                                                                                                                                                                                                                                                                                                                                                                                                                                                                                                                                                                                                                                      | 1.51900  | 0.48328  |          |          |   |          |         |          |   |          |          |          |   |          |          |          |   |          |         |          |   |          |          |          |   |          |          |          |   |          |          |          |   |          |         |          |   |          |          |         |   |                                                                                                                                                                                                                                                                                                                                                                                                                                                                                                                                                                                                                                                                                                                                                                     |          |         |         |          |          |         |         |          |         |          |          |          |          |         |         |          |          |          |         |          |         |         |          |          |          |          |          |          |          |          |          |          |          |          |         |          |          |          |          |          |          |          |   |          |          |          |   |          |          |          |   |          |          |          |   |          |          |         |   |          |          |         |   |          |          |         |   |          |          |         |   |          |          |          |   |          |          |         |   |          |         |         |   |          |         |          |   |          |         |         |   |          |         |         |                                                                                                                                                                                                                       |                                                                                                                                                                                                                                                                                                                                                                                                                                                                                                                                                                                                                                                                                                                                                                                                                                                                                                                                                                                                                                                                                                                                                                                                                                                                                                                                                                                                                                                                                                                                                                                                                                                                                                                                                                                                                                                                                                                                                                                                                                                                                                                                                                                                                                                                                                                                                                                                                                                                                                         |         |          |         |          |          |         |         |          |         |          |          |          |         |          |                                                                                                                                                                                                                        |                                                                                                                                                                                                                                                                                                                                                                                                                                                                                                                                                                                                                                                                                                                                                                                                                                                                                                                                                                                                                                                                                                                                                                                                                                                                                                                                                                                                                                                                                                                                                                                                                                                                                                                                                                                                                                                                                                                                                                                                                                                                                                                                                                                                                                                                                                                                                                                                                                                                                                                                                                                                                                                                                                                                                                                                |   |          |          |          |   |         |          |          |   |          |          |          |   |          |          |          |   |          |          |         |   |          |          |         |   |          |          |          |   |          |          |          |   |          |          |          |   |         |          |         |   |          |          |         |   |          |         |          |   |          |          |          |   |          |         |          |   |          |          |         |   |          |          |          |   |          |          |         |   |          |         |          |   |          |          |          |   |          |         |          |   |          |          |          |   |          |          |          |   |          |          |          |   |          |          |          |   |          |         |         |   |          |         |         |   |         |          |          |   |          |          |          |   |          |          |          |   |          |          |          |   |          |          |         |   |          |          |         |   |         |         |          |   |         |         |          |   |         |         |          |   |         |         |          |   |          |         |          |   |          |          |         |
| O                                                                                                                                                                                                                     | -1.10410                                                                                                                                                                                                                                                                                                                                                                                                                                                                                                                                                                                                                                                                                                                                                                                                                                                                                                                                                                                                                                                                                                                                                                                                                                                                                                                                                                                                                                                                                                                                                                                                                                                                                                                                                                                                                                                                                                                                                                                                                                                                                                                                                                                                                                                                                                                                                                                                                                                                                                                                                                                                                                                                                                                                                                                     | 2.98289  | 0.45270  |          |          |   |          |         |          |   |          |          |          |   |          |          |          |   |          |         |          |   |          |          |          |   |          |          |          |   |          |          |          |   |          |         |          |   |          |          |         |   |                                                                                                                                                                                                                                                                                                                                                                                                                                                                                                                                                                                                                                                                                                                                                                     |          |         |         |          |          |         |         |          |         |          |          |          |          |         |         |          |          |          |         |          |         |         |          |          |          |          |          |          |          |          |          |          |          |          |         |          |          |          |          |          |          |          |   |          |          |          |   |          |          |          |   |          |          |          |   |          |          |         |   |          |          |         |   |          |          |         |   |          |          |         |   |          |          |          |   |          |          |         |   |          |         |         |   |          |         |          |   |          |         |         |   |          |         |         |                                                                                                                                                                                                                       |                                                                                                                                                                                                                                                                                                                                                                                                                                                                                                                                                                                                                                                                                                                                                                                                                                                                                                                                                                                                                                                                                                                                                                                                                                                                                                                                                                                                                                                                                                                                                                                                                                                                                                                                                                                                                                                                                                                                                                                                                                                                                                                                                                                                                                                                                                                                                                                                                                                                                                         |         |          |         |          |          |         |         |          |         |          |          |          |         |          |                                                                                                                                                                                                                        |                                                                                                                                                                                                                                                                                                                                                                                                                                                                                                                                                                                                                                                                                                                                                                                                                                                                                                                                                                                                                                                                                                                                                                                                                                                                                                                                                                                                                                                                                                                                                                                                                                                                                                                                                                                                                                                                                                                                                                                                                                                                                                                                                                                                                                                                                                                                                                                                                                                                                                                                                                                                                                                                                                                                                                                                |   |          |          |          |   |         |          |          |   |          |          |          |   |          |          |          |   |          |          |         |   |          |          |         |   |          |          |          |   |          |          |          |   |          |          |          |   |         |          |         |   |          |          |         |   |          |         |          |   |          |          |          |   |          |         |          |   |          |          |         |   |          |          |          |   |          |          |         |   |          |         |          |   |          |          |          |   |          |         |          |   |          |          |          |   |          |          |          |   |          |          |          |   |          |          |          |   |          |         |         |   |          |         |         |   |         |          |          |   |          |          |          |   |          |          |          |   |          |          |          |   |          |          |         |   |          |          |         |   |         |         |          |   |         |         |          |   |         |         |          |   |         |         |          |   |          |         |          |   |          |          |         |
| O                                                                                                                                                                                                                     | -3.17999                                                                                                                                                                                                                                                                                                                                                                                                                                                                                                                                                                                                                                                                                                                                                                                                                                                                                                                                                                                                                                                                                                                                                                                                                                                                                                                                                                                                                                                                                                                                                                                                                                                                                                                                                                                                                                                                                                                                                                                                                                                                                                                                                                                                                                                                                                                                                                                                                                                                                                                                                                                                                                                                                                                                                                                     | -0.78143 | 0.42753  |          |          |   |          |         |          |   |          |          |          |   |          |          |          |   |          |         |          |   |          |          |          |   |          |          |          |   |          |          |          |   |          |         |          |   |          |          |         |   |                                                                                                                                                                                                                                                                                                                                                                                                                                                                                                                                                                                                                                                                                                                                                                     |          |         |         |          |          |         |         |          |         |          |          |          |          |         |         |          |          |          |         |          |         |         |          |          |          |          |          |          |          |          |          |          |          |          |         |          |          |          |          |          |          |          |   |          |          |          |   |          |          |          |   |          |          |          |   |          |          |         |   |          |          |         |   |          |          |         |   |          |          |         |   |          |          |          |   |          |          |         |   |          |         |         |   |          |         |          |   |          |         |         |   |          |         |         |                                                                                                                                                                                                                       |                                                                                                                                                                                                                                                                                                                                                                                                                                                                                                                                                                                                                                                                                                                                                                                                                                                                                                                                                                                                                                                                                                                                                                                                                                                                                                                                                                                                                                                                                                                                                                                                                                                                                                                                                                                                                                                                                                                                                                                                                                                                                                                                                                                                                                                                                                                                                                                                                                                                                                         |         |          |         |          |          |         |         |          |         |          |          |          |         |          |                                                                                                                                                                                                                        |                                                                                                                                                                                                                                                                                                                                                                                                                                                                                                                                                                                                                                                                                                                                                                                                                                                                                                                                                                                                                                                                                                                                                                                                                                                                                                                                                                                                                                                                                                                                                                                                                                                                                                                                                                                                                                                                                                                                                                                                                                                                                                                                                                                                                                                                                                                                                                                                                                                                                                                                                                                                                                                                                                                                                                                                |   |          |          |          |   |         |          |          |   |          |          |          |   |          |          |          |   |          |          |         |   |          |          |         |   |          |          |          |   |          |          |          |   |          |          |          |   |         |          |         |   |          |          |         |   |          |         |          |   |          |          |          |   |          |         |          |   |          |          |         |   |          |          |          |   |          |          |         |   |          |         |          |   |          |          |          |   |          |         |          |   |          |          |          |   |          |          |          |   |          |          |          |   |          |          |          |   |          |         |         |   |          |         |         |   |         |          |          |   |          |          |          |   |          |          |          |   |          |          |          |   |          |          |         |   |          |          |         |   |         |         |          |   |         |         |          |   |         |         |          |   |         |         |          |   |          |         |          |   |          |          |         |
| C                                                                                                                                                                                                                     | -3.66302                                                                                                                                                                                                                                                                                                                                                                                                                                                                                                                                                                                                                                                                                                                                                                                                                                                                                                                                                                                                                                                                                                                                                                                                                                                                                                                                                                                                                                                                                                                                                                                                                                                                                                                                                                                                                                                                                                                                                                                                                                                                                                                                                                                                                                                                                                                                                                                                                                                                                                                                                                                                                                                                                                                                                                                     | -2.10933 | 0.29270  |          |          |   |          |         |          |   |          |          |          |   |          |          |          |   |          |         |          |   |          |          |          |   |          |          |          |   |          |          |          |   |          |         |          |   |          |          |         |   |                                                                                                                                                                                                                                                                                                                                                                                                                                                                                                                                                                                                                                                                                                                                                                     |          |         |         |          |          |         |         |          |         |          |          |          |          |         |         |          |          |          |         |          |         |         |          |          |          |          |          |          |          |          |          |          |          |          |         |          |          |          |          |          |          |          |   |          |          |          |   |          |          |          |   |          |          |          |   |          |          |         |   |          |          |         |   |          |          |         |   |          |          |         |   |          |          |          |   |          |          |         |   |          |         |         |   |          |         |          |   |          |         |         |   |          |         |         |                                                                                                                                                                                                                       |                                                                                                                                                                                                                                                                                                                                                                                                                                                                                                                                                                                                                                                                                                                                                                                                                                                                                                                                                                                                                                                                                                                                                                                                                                                                                                                                                                                                                                                                                                                                                                                                                                                                                                                                                                                                                                                                                                                                                                                                                                                                                                                                                                                                                                                                                                                                                                                                                                                                                                         |         |          |         |          |          |         |         |          |         |          |          |          |         |          |                                                                                                                                                                                                                        |                                                                                                                                                                                                                                                                                                                                                                                                                                                                                                                                                                                                                                                                                                                                                                                                                                                                                                                                                                                                                                                                                                                                                                                                                                                                                                                                                                                                                                                                                                                                                                                                                                                                                                                                                                                                                                                                                                                                                                                                                                                                                                                                                                                                                                                                                                                                                                                                                                                                                                                                                                                                                                                                                                                                                                                                |   |          |          |          |   |         |          |          |   |          |          |          |   |          |          |          |   |          |          |         |   |          |          |         |   |          |          |          |   |          |          |          |   |          |          |          |   |         |          |         |   |          |          |         |   |          |         |          |   |          |          |          |   |          |         |          |   |          |          |         |   |          |          |          |   |          |          |         |   |          |         |          |   |          |          |          |   |          |         |          |   |          |          |          |   |          |          |          |   |          |          |          |   |          |          |          |   |          |         |         |   |          |         |         |   |         |          |          |   |          |          |          |   |          |          |          |   |          |          |          |   |          |          |         |   |          |          |         |   |         |         |          |   |         |         |          |   |         |         |          |   |         |         |          |   |          |         |          |   |          |          |         |
| H                                                                                                                                                                                                                     | -2.82421                                                                                                                                                                                                                                                                                                                                                                                                                                                                                                                                                                                                                                                                                                                                                                                                                                                                                                                                                                                                                                                                                                                                                                                                                                                                                                                                                                                                                                                                                                                                                                                                                                                                                                                                                                                                                                                                                                                                                                                                                                                                                                                                                                                                                                                                                                                                                                                                                                                                                                                                                                                                                                                                                                                                                                                     | -2.80636 | 0.22335  |          |          |   |          |         |          |   |          |          |          |   |          |          |          |   |          |         |          |   |          |          |          |   |          |          |          |   |          |          |          |   |          |         |          |   |          |          |         |   |                                                                                                                                                                                                                                                                                                                                                                                                                                                                                                                                                                                                                                                                                                                                                                     |          |         |         |          |          |         |         |          |         |          |          |          |          |         |         |          |          |          |         |          |         |         |          |          |          |          |          |          |          |          |          |          |          |          |         |          |          |          |          |          |          |          |   |          |          |          |   |          |          |          |   |          |          |          |   |          |          |         |   |          |          |         |   |          |          |         |   |          |          |         |   |          |          |          |   |          |          |         |   |          |         |         |   |          |         |          |   |          |         |         |   |          |         |         |                                                                                                                                                                                                                       |                                                                                                                                                                                                                                                                                                                                                                                                                                                                                                                                                                                                                                                                                                                                                                                                                                                                                                                                                                                                                                                                                                                                                                                                                                                                                                                                                                                                                                                                                                                                                                                                                                                                                                                                                                                                                                                                                                                                                                                                                                                                                                                                                                                                                                                                                                                                                                                                                                                                                                         |         |          |         |          |          |         |         |          |         |          |          |          |         |          |                                                                                                                                                                                                                        |                                                                                                                                                                                                                                                                                                                                                                                                                                                                                                                                                                                                                                                                                                                                                                                                                                                                                                                                                                                                                                                                                                                                                                                                                                                                                                                                                                                                                                                                                                                                                                                                                                                                                                                                                                                                                                                                                                                                                                                                                                                                                                                                                                                                                                                                                                                                                                                                                                                                                                                                                                                                                                                                                                                                                                                                |   |          |          |          |   |         |          |          |   |          |          |          |   |          |          |          |   |          |          |         |   |          |          |         |   |          |          |          |   |          |          |          |   |          |          |          |   |         |          |         |   |          |          |         |   |          |         |          |   |          |          |          |   |          |         |          |   |          |          |         |   |          |          |          |   |          |          |         |   |          |         |          |   |          |          |          |   |          |         |          |   |          |          |          |   |          |          |          |   |          |          |          |   |          |          |          |   |          |         |         |   |          |         |         |   |         |          |          |   |          |          |          |   |          |          |          |   |          |          |          |   |          |          |         |   |          |          |         |   |         |         |          |   |         |         |          |   |         |         |          |   |         |         |          |   |          |         |          |   |          |          |         |
| H                                                                                                                                                                                                                     | -4.21239                                                                                                                                                                                                                                                                                                                                                                                                                                                                                                                                                                                                                                                                                                                                                                                                                                                                                                                                                                                                                                                                                                                                                                                                                                                                                                                                                                                                                                                                                                                                                                                                                                                                                                                                                                                                                                                                                                                                                                                                                                                                                                                                                                                                                                                                                                                                                                                                                                                                                                                                                                                                                                                                                                                                                                                     | -2.13684 | -0.64755 |          |          |   |          |         |          |   |          |          |          |   |          |          |          |   |          |         |          |   |          |          |          |   |          |          |          |   |          |          |          |   |          |         |          |   |          |          |         |   |                                                                                                                                                                                                                                                                                                                                                                                                                                                                                                                                                                                                                                                                                                                                                                     |          |         |         |          |          |         |         |          |         |          |          |          |          |         |         |          |          |          |         |          |         |         |          |          |          |          |          |          |          |          |          |          |          |          |         |          |          |          |          |          |          |          |   |          |          |          |   |          |          |          |   |          |          |          |   |          |          |         |   |          |          |         |   |          |          |         |   |          |          |         |   |          |          |          |   |          |          |         |   |          |         |         |   |          |         |          |   |          |         |         |   |          |         |         |                                                                                                                                                                                                                       |                                                                                                                                                                                                                                                                                                                                                                                                                                                                                                                                                                                                                                                                                                                                                                                                                                                                                                                                                                                                                                                                                                                                                                                                                                                                                                                                                                                                                                                                                                                                                                                                                                                                                                                                                                                                                                                                                                                                                                                                                                                                                                                                                                                                                                                                                                                                                                                                                                                                                                         |         |          |         |          |          |         |         |          |         |          |          |          |         |          |                                                                                                                                                                                                                        |                                                                                                                                                                                                                                                                                                                                                                                                                                                                                                                                                                                                                                                                                                                                                                                                                                                                                                                                                                                                                                                                                                                                                                                                                                                                                                                                                                                                                                                                                                                                                                                                                                                                                                                                                                                                                                                                                                                                                                                                                                                                                                                                                                                                                                                                                                                                                                                                                                                                                                                                                                                                                                                                                                                                                                                                |   |          |          |          |   |         |          |          |   |          |          |          |   |          |          |          |   |          |          |         |   |          |          |         |   |          |          |          |   |          |          |          |   |          |          |          |   |         |          |         |   |          |          |         |   |          |         |          |   |          |          |          |   |          |         |          |   |          |          |         |   |          |          |          |   |          |          |         |   |          |         |          |   |          |          |          |   |          |         |          |   |          |          |          |   |          |          |          |   |          |          |          |   |          |          |          |   |          |         |         |   |          |         |         |   |         |          |          |   |          |          |          |   |          |          |          |   |          |          |          |   |          |          |         |   |          |          |         |   |         |         |          |   |         |         |          |   |         |         |          |   |         |         |          |   |          |         |          |   |          |          |         |
| H                                                                                                                                                                                                                     | -4.32582                                                                                                                                                                                                                                                                                                                                                                                                                                                                                                                                                                                                                                                                                                                                                                                                                                                                                                                                                                                                                                                                                                                                                                                                                                                                                                                                                                                                                                                                                                                                                                                                                                                                                                                                                                                                                                                                                                                                                                                                                                                                                                                                                                                                                                                                                                                                                                                                                                                                                                                                                                                                                                                                                                                                                                                     | -2.38072 | 1.12880  |          |          |   |          |         |          |   |          |          |          |   |          |          |          |   |          |         |          |   |          |          |          |   |          |          |          |   |          |          |          |   |          |         |          |   |          |          |         |   |                                                                                                                                                                                                                                                                                                                                                                                                                                                                                                                                                                                                                                                                                                                                                                     |          |         |         |          |          |         |         |          |         |          |          |          |          |         |         |          |          |          |         |          |         |         |          |          |          |          |          |          |          |          |          |          |          |          |         |          |          |          |          |          |          |          |   |          |          |          |   |          |          |          |   |          |          |          |   |          |          |         |   |          |          |         |   |          |          |         |   |          |          |         |   |          |          |          |   |          |          |         |   |          |         |         |   |          |         |          |   |          |         |         |   |          |         |         |                                                                                                                                                                                                                       |                                                                                                                                                                                                                                                                                                                                                                                                                                                                                                                                                                                                                                                                                                                                                                                                                                                                                                                                                                                                                                                                                                                                                                                                                                                                                                                                                                                                                                                                                                                                                                                                                                                                                                                                                                                                                                                                                                                                                                                                                                                                                                                                                                                                                                                                                                                                                                                                                                                                                                         |         |          |         |          |          |         |         |          |         |          |          |          |         |          |                                                                                                                                                                                                                        |                                                                                                                                                                                                                                                                                                                                                                                                                                                                                                                                                                                                                                                                                                                                                                                                                                                                                                                                                                                                                                                                                                                                                                                                                                                                                                                                                                                                                                                                                                                                                                                                                                                                                                                                                                                                                                                                                                                                                                                                                                                                                                                                                                                                                                                                                                                                                                                                                                                                                                                                                                                                                                                                                                                                                                                                |   |          |          |          |   |         |          |          |   |          |          |          |   |          |          |          |   |          |          |         |   |          |          |         |   |          |          |          |   |          |          |          |   |          |          |          |   |         |          |         |   |          |          |         |   |          |         |          |   |          |          |          |   |          |         |          |   |          |          |         |   |          |          |          |   |          |          |         |   |          |         |          |   |          |          |          |   |          |         |          |   |          |          |          |   |          |          |          |   |          |          |          |   |          |          |          |   |          |         |         |   |          |         |         |   |         |          |          |   |          |          |          |   |          |          |          |   |          |          |          |   |          |          |         |   |          |          |         |   |         |         |          |   |         |         |          |   |         |         |          |   |         |         |          |   |          |         |          |   |          |          |         |
| C                                                                                                                                                                                                                     | -0.21174                                                                                                                                                                                                                                                                                                                                                                                                                                                                                                                                                                                                                                                                                                                                                                                                                                                                                                                                                                                                                                                                                                                                                                                                                                                                                                                                                                                                                                                                                                                                                                                                                                                                                                                                                                                                                                                                                                                                                                                                                                                                                                                                                                                                                                                                                                                                                                                                                                                                                                                                                                                                                                                                                                                                                                                     | 4.08571  | 0.49946  |          |          |   |          |         |          |   |          |          |          |   |          |          |          |   |          |         |          |   |          |          |          |   |          |          |          |   |          |          |          |   |          |         |          |   |          |          |         |   |                                                                                                                                                                                                                                                                                                                                                                                                                                                                                                                                                                                                                                                                                                                                                                     |          |         |         |          |          |         |         |          |         |          |          |          |          |         |         |          |          |          |         |          |         |         |          |          |          |          |          |          |          |          |          |          |          |          |         |          |          |          |          |          |          |          |   |          |          |          |   |          |          |          |   |          |          |          |   |          |          |         |   |          |          |         |   |          |          |         |   |          |          |         |   |          |          |          |   |          |          |         |   |          |         |         |   |          |         |          |   |          |         |         |   |          |         |         |                                                                                                                                                                                                                       |                                                                                                                                                                                                                                                                                                                                                                                                                                                                                                                                                                                                                                                                                                                                                                                                                                                                                                                                                                                                                                                                                                                                                                                                                                                                                                                                                                                                                                                                                                                                                                                                                                                                                                                                                                                                                                                                                                                                                                                                                                                                                                                                                                                                                                                                                                                                                                                                                                                                                                         |         |          |         |          |          |         |         |          |         |          |          |          |         |          |                                                                                                                                                                                                                        |                                                                                                                                                                                                                                                                                                                                                                                                                                                                                                                                                                                                                                                                                                                                                                                                                                                                                                                                                                                                                                                                                                                                                                                                                                                                                                                                                                                                                                                                                                                                                                                                                                                                                                                                                                                                                                                                                                                                                                                                                                                                                                                                                                                                                                                                                                                                                                                                                                                                                                                                                                                                                                                                                                                                                                                                |   |          |          |          |   |         |          |          |   |          |          |          |   |          |          |          |   |          |          |         |   |          |          |         |   |          |          |          |   |          |          |          |   |          |          |          |   |         |          |         |   |          |          |         |   |          |         |          |   |          |          |          |   |          |         |          |   |          |          |         |   |          |          |          |   |          |          |         |   |          |         |          |   |          |          |          |   |          |         |          |   |          |          |          |   |          |          |          |   |          |          |          |   |          |          |          |   |          |         |         |   |          |         |         |   |         |          |          |   |          |          |          |   |          |          |          |   |          |          |          |   |          |          |         |   |          |          |         |   |         |         |          |   |         |         |          |   |         |         |          |   |         |         |          |   |          |         |          |   |          |          |         |
| H                                                                                                                                                                                                                     | -0.57674                                                                                                                                                                                                                                                                                                                                                                                                                                                                                                                                                                                                                                                                                                                                                                                                                                                                                                                                                                                                                                                                                                                                                                                                                                                                                                                                                                                                                                                                                                                                                                                                                                                                                                                                                                                                                                                                                                                                                                                                                                                                                                                                                                                                                                                                                                                                                                                                                                                                                                                                                                                                                                                                                                                                                                                     | 4.92213  | -0.11635 |          |          |   |          |         |          |   |          |          |          |   |          |          |          |   |          |         |          |   |          |          |          |   |          |          |          |   |          |          |          |   |          |         |          |   |          |          |         |   |                                                                                                                                                                                                                                                                                                                                                                                                                                                                                                                                                                                                                                                                                                                                                                     |          |         |         |          |          |         |         |          |         |          |          |          |          |         |         |          |          |          |         |          |         |         |          |          |          |          |          |          |          |          |          |          |          |          |         |          |          |          |          |          |          |          |   |          |          |          |   |          |          |          |   |          |          |          |   |          |          |         |   |          |          |         |   |          |          |         |   |          |          |         |   |          |          |          |   |          |          |         |   |          |         |         |   |          |         |          |   |          |         |         |   |          |         |         |                                                                                                                                                                                                                       |                                                                                                                                                                                                                                                                                                                                                                                                                                                                                                                                                                                                                                                                                                                                                                                                                                                                                                                                                                                                                                                                                                                                                                                                                                                                                                                                                                                                                                                                                                                                                                                                                                                                                                                                                                                                                                                                                                                                                                                                                                                                                                                                                                                                                                                                                                                                                                                                                                                                                                         |         |          |         |          |          |         |         |          |         |          |          |          |         |          |                                                                                                                                                                                                                        |                                                                                                                                                                                                                                                                                                                                                                                                                                                                                                                                                                                                                                                                                                                                                                                                                                                                                                                                                                                                                                                                                                                                                                                                                                                                                                                                                                                                                                                                                                                                                                                                                                                                                                                                                                                                                                                                                                                                                                                                                                                                                                                                                                                                                                                                                                                                                                                                                                                                                                                                                                                                                                                                                                                                                                                                |   |          |          |          |   |         |          |          |   |          |          |          |   |          |          |          |   |          |          |         |   |          |          |         |   |          |          |          |   |          |          |          |   |          |          |          |   |         |          |         |   |          |          |         |   |          |         |          |   |          |          |          |   |          |         |          |   |          |          |         |   |          |          |          |   |          |          |         |   |          |         |          |   |          |          |          |   |          |         |          |   |          |          |          |   |          |          |          |   |          |          |          |   |          |          |          |   |          |         |         |   |          |         |         |   |         |          |          |   |          |          |          |   |          |          |          |   |          |          |          |   |          |          |         |   |          |          |         |   |         |         |          |   |         |         |          |   |         |         |          |   |         |         |          |   |          |         |          |   |          |          |         |
| H                                                                                                                                                                                                                     | 0.78428                                                                                                                                                                                                                                                                                                                                                                                                                                                                                                                                                                                                                                                                                                                                                                                                                                                                                                                                                                                                                                                                                                                                                                                                                                                                                                                                                                                                                                                                                                                                                                                                                                                                                                                                                                                                                                                                                                                                                                                                                                                                                                                                                                                                                                                                                                                                                                                                                                                                                                                                                                                                                                                                                                                                                                                      | 3.77392  | 0.17542  |          |          |   |          |         |          |   |          |          |          |   |          |          |          |   |          |         |          |   |          |          |          |   |          |          |          |   |          |          |          |   |          |         |          |   |          |          |         |   |                                                                                                                                                                                                                                                                                                                                                                                                                                                                                                                                                                                                                                                                                                                                                                     |          |         |         |          |          |         |         |          |         |          |          |          |          |         |         |          |          |          |         |          |         |         |          |          |          |          |          |          |          |          |          |          |          |          |         |          |          |          |          |          |          |          |   |          |          |          |   |          |          |          |   |          |          |          |   |          |          |         |   |          |          |         |   |          |          |         |   |          |          |         |   |          |          |          |   |          |          |         |   |          |         |         |   |          |         |          |   |          |         |         |   |          |         |         |                                                                                                                                                                                                                       |                                                                                                                                                                                                                                                                                                                                                                                                                                                                                                                                                                                                                                                                                                                                                                                                                                                                                                                                                                                                                                                                                                                                                                                                                                                                                                                                                                                                                                                                                                                                                                                                                                                                                                                                                                                                                                                                                                                                                                                                                                                                                                                                                                                                                                                                                                                                                                                                                                                                                                         |         |          |         |          |          |         |         |          |         |          |          |          |         |          |                                                                                                                                                                                                                        |                                                                                                                                                                                                                                                                                                                                                                                                                                                                                                                                                                                                                                                                                                                                                                                                                                                                                                                                                                                                                                                                                                                                                                                                                                                                                                                                                                                                                                                                                                                                                                                                                                                                                                                                                                                                                                                                                                                                                                                                                                                                                                                                                                                                                                                                                                                                                                                                                                                                                                                                                                                                                                                                                                                                                                                                |   |          |          |          |   |         |          |          |   |          |          |          |   |          |          |          |   |          |          |         |   |          |          |         |   |          |          |          |   |          |          |          |   |          |          |          |   |         |          |         |   |          |          |         |   |          |         |          |   |          |          |          |   |          |         |          |   |          |          |         |   |          |          |          |   |          |          |         |   |          |         |          |   |          |          |          |   |          |         |          |   |          |          |          |   |          |          |          |   |          |          |          |   |          |          |          |   |          |         |         |   |          |         |         |   |         |          |          |   |          |          |          |   |          |          |          |   |          |          |          |   |          |          |         |   |          |          |         |   |         |         |          |   |         |         |          |   |         |         |          |   |         |         |          |   |          |         |          |   |          |          |         |
| H                                                                                                                                                                                                                     | -0.15591                                                                                                                                                                                                                                                                                                                                                                                                                                                                                                                                                                                                                                                                                                                                                                                                                                                                                                                                                                                                                                                                                                                                                                                                                                                                                                                                                                                                                                                                                                                                                                                                                                                                                                                                                                                                                                                                                                                                                                                                                                                                                                                                                                                                                                                                                                                                                                                                                                                                                                                                                                                                                                                                                                                                                                                     | 4.38484  | 1.54542  |          |          |   |          |         |          |   |          |          |          |   |          |          |          |   |          |         |          |   |          |          |          |   |          |          |          |   |          |          |          |   |          |         |          |   |          |          |         |   |                                                                                                                                                                                                                                                                                                                                                                                                                                                                                                                                                                                                                                                                                                                                                                     |          |         |         |          |          |         |         |          |         |          |          |          |          |         |         |          |          |          |         |          |         |         |          |          |          |          |          |          |          |          |          |          |          |          |         |          |          |          |          |          |          |          |   |          |          |          |   |          |          |          |   |          |          |          |   |          |          |         |   |          |          |         |   |          |          |         |   |          |          |         |   |          |          |          |   |          |          |         |   |          |         |         |   |          |         |          |   |          |         |         |   |          |         |         |                                                                                                                                                                                                                       |                                                                                                                                                                                                                                                                                                                                                                                                                                                                                                                                                                                                                                                                                                                                                                                                                                                                                                                                                                                                                                                                                                                                                                                                                                                                                                                                                                                                                                                                                                                                                                                                                                                                                                                                                                                                                                                                                                                                                                                                                                                                                                                                                                                                                                                                                                                                                                                                                                                                                                         |         |          |         |          |          |         |         |          |         |          |          |          |         |          |                                                                                                                                                                                                                        |                                                                                                                                                                                                                                                                                                                                                                                                                                                                                                                                                                                                                                                                                                                                                                                                                                                                                                                                                                                                                                                                                                                                                                                                                                                                                                                                                                                                                                                                                                                                                                                                                                                                                                                                                                                                                                                                                                                                                                                                                                                                                                                                                                                                                                                                                                                                                                                                                                                                                                                                                                                                                                                                                                                                                                                                |   |          |          |          |   |         |          |          |   |          |          |          |   |          |          |          |   |          |          |         |   |          |          |         |   |          |          |          |   |          |          |          |   |          |          |          |   |         |          |         |   |          |          |         |   |          |         |          |   |          |          |          |   |          |         |          |   |          |          |         |   |          |          |          |   |          |          |         |   |          |         |          |   |          |          |          |   |          |         |          |   |          |          |          |   |          |          |          |   |          |          |          |   |          |          |          |   |          |         |         |   |          |         |         |   |         |          |          |   |          |          |          |   |          |          |          |   |          |          |          |   |          |          |         |   |          |          |         |   |         |         |          |   |         |         |          |   |         |         |          |   |         |         |          |   |          |         |          |   |          |          |         |
| C                                                                                                                                                                                                                     | -0.46295                                                                                                                                                                                                                                                                                                                                                                                                                                                                                                                                                                                                                                                                                                                                                                                                                                                                                                                                                                                                                                                                                                                                                                                                                                                                                                                                                                                                                                                                                                                                                                                                                                                                                                                                                                                                                                                                                                                                                                                                                                                                                                                                                                                                                                                                                                                                                                                                                                                                                                                                                                                                                                                                                                                                                                                     | 0.60050  | -3.51715 |          |          |   |          |         |          |   |          |          |          |   |          |          |          |   |          |         |          |   |          |          |          |   |          |          |          |   |          |          |          |   |          |         |          |   |          |          |         |   |                                                                                                                                                                                                                                                                                                                                                                                                                                                                                                                                                                                                                                                                                                                                                                     |          |         |         |          |          |         |         |          |         |          |          |          |          |         |         |          |          |          |         |          |         |         |          |          |          |          |          |          |          |          |          |          |          |          |         |          |          |          |          |          |          |          |   |          |          |          |   |          |          |          |   |          |          |          |   |          |          |         |   |          |          |         |   |          |          |         |   |          |          |         |   |          |          |          |   |          |          |         |   |          |         |         |   |          |         |          |   |          |         |         |   |          |         |         |                                                                                                                                                                                                                       |                                                                                                                                                                                                                                                                                                                                                                                                                                                                                                                                                                                                                                                                                                                                                                                                                                                                                                                                                                                                                                                                                                                                                                                                                                                                                                                                                                                                                                                                                                                                                                                                                                                                                                                                                                                                                                                                                                                                                                                                                                                                                                                                                                                                                                                                                                                                                                                                                                                                                                         |         |          |         |          |          |         |         |          |         |          |          |          |         |          |                                                                                                                                                                                                                        |                                                                                                                                                                                                                                                                                                                                                                                                                                                                                                                                                                                                                                                                                                                                                                                                                                                                                                                                                                                                                                                                                                                                                                                                                                                                                                                                                                                                                                                                                                                                                                                                                                                                                                                                                                                                                                                                                                                                                                                                                                                                                                                                                                                                                                                                                                                                                                                                                                                                                                                                                                                                                                                                                                                                                                                                |   |          |          |          |   |         |          |          |   |          |          |          |   |          |          |          |   |          |          |         |   |          |          |         |   |          |          |          |   |          |          |          |   |          |          |          |   |         |          |         |   |          |          |         |   |          |         |          |   |          |          |          |   |          |         |          |   |          |          |         |   |          |          |          |   |          |          |         |   |          |         |          |   |          |          |          |   |          |         |          |   |          |          |          |   |          |          |          |   |          |          |          |   |          |          |          |   |          |         |         |   |          |         |         |   |         |          |          |   |          |          |          |   |          |          |          |   |          |          |          |   |          |          |         |   |          |          |         |   |         |         |          |   |         |         |          |   |         |         |          |   |         |         |          |   |          |         |          |   |          |          |         |
| C                                                                                                                                                                                                                     | 0.01424                                                                                                                                                                                                                                                                                                                                                                                                                                                                                                                                                                                                                                                                                                                                                                                                                                                                                                                                                                                                                                                                                                                                                                                                                                                                                                                                                                                                                                                                                                                                                                                                                                                                                                                                                                                                                                                                                                                                                                                                                                                                                                                                                                                                                                                                                                                                                                                                                                                                                                                                                                                                                                                                                                                                                                                      | 0.16357  | -0.73328 |          |          |   |          |         |          |   |          |          |          |   |          |          |          |   |          |         |          |   |          |          |          |   |          |          |          |   |          |          |          |   |          |         |          |   |          |          |         |   |                                                                                                                                                                                                                                                                                                                                                                                                                                                                                                                                                                                                                                                                                                                                                                     |          |         |         |          |          |         |         |          |         |          |          |          |          |         |         |          |          |          |         |          |         |         |          |          |          |          |          |          |          |          |          |          |          |          |         |          |          |          |          |          |          |          |   |          |          |          |   |          |          |          |   |          |          |          |   |          |          |         |   |          |          |         |   |          |          |         |   |          |          |         |   |          |          |          |   |          |          |         |   |          |         |         |   |          |         |          |   |          |         |         |   |          |         |         |                                                                                                                                                                                                                       |                                                                                                                                                                                                                                                                                                                                                                                                                                                                                                                                                                                                                                                                                                                                                                                                                                                                                                                                                                                                                                                                                                                                                                                                                                                                                                                                                                                                                                                                                                                                                                                                                                                                                                                                                                                                                                                                                                                                                                                                                                                                                                                                                                                                                                                                                                                                                                                                                                                                                                         |         |          |         |          |          |         |         |          |         |          |          |          |         |          |                                                                                                                                                                                                                        |                                                                                                                                                                                                                                                                                                                                                                                                                                                                                                                                                                                                                                                                                                                                                                                                                                                                                                                                                                                                                                                                                                                                                                                                                                                                                                                                                                                                                                                                                                                                                                                                                                                                                                                                                                                                                                                                                                                                                                                                                                                                                                                                                                                                                                                                                                                                                                                                                                                                                                                                                                                                                                                                                                                                                                                                |   |          |          |          |   |         |          |          |   |          |          |          |   |          |          |          |   |          |          |         |   |          |          |         |   |          |          |          |   |          |          |          |   |          |          |          |   |         |          |         |   |          |          |         |   |          |         |          |   |          |          |          |   |          |         |          |   |          |          |         |   |          |          |          |   |          |          |         |   |          |         |          |   |          |          |          |   |          |         |          |   |          |          |          |   |          |          |          |   |          |          |          |   |          |          |          |   |          |         |         |   |          |         |         |   |         |          |          |   |          |          |          |   |          |          |          |   |          |          |          |   |          |          |         |   |          |          |         |   |         |         |          |   |         |         |          |   |         |         |          |   |         |         |          |   |          |         |          |   |          |          |         |
| C                                                                                                                                                                                                                     | -0.12185                                                                                                                                                                                                                                                                                                                                                                                                                                                                                                                                                                                                                                                                                                                                                                                                                                                                                                                                                                                                                                                                                                                                                                                                                                                                                                                                                                                                                                                                                                                                                                                                                                                                                                                                                                                                                                                                                                                                                                                                                                                                                                                                                                                                                                                                                                                                                                                                                                                                                                                                                                                                                                                                                                                                                                                     | -0.66433 | -3.06279 |          |          |   |          |         |          |   |          |          |          |   |          |          |          |   |          |         |          |   |          |          |          |   |          |          |          |   |          |          |          |   |          |         |          |   |          |          |         |   |                                                                                                                                                                                                                                                                                                                                                                                                                                                                                                                                                                                                                                                                                                                                                                     |          |         |         |          |          |         |         |          |         |          |          |          |          |         |         |          |          |          |         |          |         |         |          |          |          |          |          |          |          |          |          |          |          |          |         |          |          |          |          |          |          |          |   |          |          |          |   |          |          |          |   |          |          |          |   |          |          |         |   |          |          |         |   |          |          |         |   |          |          |         |   |          |          |          |   |          |          |         |   |          |         |         |   |          |         |          |   |          |         |         |   |          |         |         |                                                                                                                                                                                                                       |                                                                                                                                                                                                                                                                                                                                                                                                                                                                                                                                                                                                                                                                                                                                                                                                                                                                                                                                                                                                                                                                                                                                                                                                                                                                                                                                                                                                                                                                                                                                                                                                                                                                                                                                                                                                                                                                                                                                                                                                                                                                                                                                                                                                                                                                                                                                                                                                                                                                                                         |         |          |         |          |          |         |         |          |         |          |          |          |         |          |                                                                                                                                                                                                                        |                                                                                                                                                                                                                                                                                                                                                                                                                                                                                                                                                                                                                                                                                                                                                                                                                                                                                                                                                                                                                                                                                                                                                                                                                                                                                                                                                                                                                                                                                                                                                                                                                                                                                                                                                                                                                                                                                                                                                                                                                                                                                                                                                                                                                                                                                                                                                                                                                                                                                                                                                                                                                                                                                                                                                                                                |   |          |          |          |   |         |          |          |   |          |          |          |   |          |          |          |   |          |          |         |   |          |          |         |   |          |          |          |   |          |          |          |   |          |          |          |   |         |          |         |   |          |          |         |   |          |         |          |   |          |          |          |   |          |         |          |   |          |          |         |   |          |          |          |   |          |          |         |   |          |         |          |   |          |          |          |   |          |         |          |   |          |          |          |   |          |          |          |   |          |          |          |   |          |          |          |   |          |         |         |   |          |         |         |   |         |          |          |   |          |          |          |   |          |          |          |   |          |          |          |   |          |          |         |   |          |          |         |   |         |         |          |   |         |         |          |   |         |         |          |   |         |         |          |   |          |         |          |   |          |          |         |
| C                                                                                                                                                                                                                     | -0.36233                                                                                                                                                                                                                                                                                                                                                                                                                                                                                                                                                                                                                                                                                                                                                                                                                                                                                                                                                                                                                                                                                                                                                                                                                                                                                                                                                                                                                                                                                                                                                                                                                                                                                                                                                                                                                                                                                                                                                                                                                                                                                                                                                                                                                                                                                                                                                                                                                                                                                                                                                                                                                                                                                                                                                                                     | 1.66458  | -2.63833 |          |          |   |          |         |          |   |          |          |          |   |          |          |          |   |          |         |          |   |          |          |          |   |          |          |          |   |          |          |          |   |          |         |          |   |          |          |         |   |                                                                                                                                                                                                                                                                                                                                                                                                                                                                                                                                                                                                                                                                                                                                                                     |          |         |         |          |          |         |         |          |         |          |          |          |          |         |         |          |          |          |         |          |         |         |          |          |          |          |          |          |          |          |          |          |          |          |         |          |          |          |          |          |          |          |   |          |          |          |   |          |          |          |   |          |          |          |   |          |          |         |   |          |          |         |   |          |          |         |   |          |          |         |   |          |          |          |   |          |          |         |   |          |         |         |   |          |         |          |   |          |         |         |   |          |         |         |                                                                                                                                                                                                                       |                                                                                                                                                                                                                                                                                                                                                                                                                                                                                                                                                                                                                                                                                                                                                                                                                                                                                                                                                                                                                                                                                                                                                                                                                                                                                                                                                                                                                                                                                                                                                                                                                                                                                                                                                                                                                                                                                                                                                                                                                                                                                                                                                                                                                                                                                                                                                                                                                                                                                                         |         |          |         |          |          |         |         |          |         |          |          |          |         |          |                                                                                                                                                                                                                        |                                                                                                                                                                                                                                                                                                                                                                                                                                                                                                                                                                                                                                                                                                                                                                                                                                                                                                                                                                                                                                                                                                                                                                                                                                                                                                                                                                                                                                                                                                                                                                                                                                                                                                                                                                                                                                                                                                                                                                                                                                                                                                                                                                                                                                                                                                                                                                                                                                                                                                                                                                                                                                                                                                                                                                                                |   |          |          |          |   |         |          |          |   |          |          |          |   |          |          |          |   |          |          |         |   |          |          |         |   |          |          |          |   |          |          |          |   |          |          |          |   |         |          |         |   |          |          |         |   |          |         |          |   |          |          |          |   |          |         |          |   |          |          |         |   |          |          |          |   |          |          |         |   |          |         |          |   |          |          |          |   |          |         |          |   |          |          |          |   |          |          |          |   |          |          |          |   |          |          |          |   |          |         |         |   |          |         |         |   |         |          |          |   |          |          |          |   |          |          |          |   |          |          |          |   |          |          |         |   |          |          |         |   |         |         |          |   |         |         |          |   |         |         |          |   |         |         |          |   |          |         |          |   |          |          |         |
| C                                                                                                                                                                                                                     | -0.05262                                                                                                                                                                                                                                                                                                                                                                                                                                                                                                                                                                                                                                                                                                                                                                                                                                                                                                                                                                                                                                                                                                                                                                                                                                                                                                                                                                                                                                                                                                                                                                                                                                                                                                                                                                                                                                                                                                                                                                                                                                                                                                                                                                                                                                                                                                                                                                                                                                                                                                                                                                                                                                                                                                                                                                                     | 1.48597  | -1.28431 |          |          |   |          |         |          |   |          |          |          |   |          |          |          |   |          |         |          |   |          |          |          |   |          |          |          |   |          |          |          |   |          |         |          |   |          |          |         |   |                                                                                                                                                                                                                                                                                                                                                                                                                                                                                                                                                                                                                                                                                                                                                                     |          |         |         |          |          |         |         |          |         |          |          |          |          |         |         |          |          |          |         |          |         |         |          |          |          |          |          |          |          |          |          |          |          |          |         |          |          |          |          |          |          |          |   |          |          |          |   |          |          |          |   |          |          |          |   |          |          |         |   |          |          |         |   |          |          |         |   |          |          |         |   |          |          |          |   |          |          |         |   |          |         |         |   |          |         |          |   |          |         |         |   |          |         |         |                                                                                                                                                                                                                       |                                                                                                                                                                                                                                                                                                                                                                                                                                                                                                                                                                                                                                                                                                                                                                                                                                                                                                                                                                                                                                                                                                                                                                                                                                                                                                                                                                                                                                                                                                                                                                                                                                                                                                                                                                                                                                                                                                                                                                                                                                                                                                                                                                                                                                                                                                                                                                                                                                                                                                         |         |          |         |          |          |         |         |          |         |          |          |          |         |          |                                                                                                                                                                                                                        |                                                                                                                                                                                                                                                                                                                                                                                                                                                                                                                                                                                                                                                                                                                                                                                                                                                                                                                                                                                                                                                                                                                                                                                                                                                                                                                                                                                                                                                                                                                                                                                                                                                                                                                                                                                                                                                                                                                                                                                                                                                                                                                                                                                                                                                                                                                                                                                                                                                                                                                                                                                                                                                                                                                                                                                                |   |          |          |          |   |         |          |          |   |          |          |          |   |          |          |          |   |          |          |         |   |          |          |         |   |          |          |          |   |          |          |          |   |          |          |          |   |         |          |         |   |          |          |         |   |          |         |          |   |          |          |          |   |          |         |          |   |          |          |         |   |          |          |          |   |          |          |         |   |          |         |          |   |          |          |          |   |          |         |          |   |          |          |          |   |          |          |          |   |          |          |          |   |          |          |          |   |          |         |         |   |          |         |         |   |         |          |          |   |          |          |          |   |          |          |          |   |          |          |          |   |          |          |         |   |          |          |         |   |         |         |          |   |         |         |          |   |         |         |          |   |         |         |          |   |          |         |          |   |          |          |         |
| C                                                                                                                                                                                                                     | 0.19283                                                                                                                                                                                                                                                                                                                                                                                                                                                                                                                                                                                                                                                                                                                                                                                                                                                                                                                                                                                                                                                                                                                                                                                                                                                                                                                                                                                                                                                                                                                                                                                                                                                                                                                                                                                                                                                                                                                                                                                                                                                                                                                                                                                                                                                                                                                                                                                                                                                                                                                                                                                                                                                                                                                                                                                      | -0.85690 | -1.71588 |          |          |   |          |         |          |   |          |          |          |   |          |          |          |   |          |         |          |   |          |          |          |   |          |          |          |   |          |          |          |   |          |         |          |   |          |          |         |   |                                                                                                                                                                                                                                                                                                                                                                                                                                                                                                                                                                                                                                                                                                                                                                     |          |         |         |          |          |         |         |          |         |          |          |          |          |         |         |          |          |          |         |          |         |         |          |          |          |          |          |          |          |          |          |          |          |          |         |          |          |          |          |          |          |          |   |          |          |          |   |          |          |          |   |          |          |          |   |          |          |         |   |          |          |         |   |          |          |         |   |          |          |         |   |          |          |          |   |          |          |         |   |          |         |         |   |          |         |          |   |          |         |         |   |          |         |         |                                                                                                                                                                                                                       |                                                                                                                                                                                                                                                                                                                                                                                                                                                                                                                                                                                                                                                                                                                                                                                                                                                                                                                                                                                                                                                                                                                                                                                                                                                                                                                                                                                                                                                                                                                                                                                                                                                                                                                                                                                                                                                                                                                                                                                                                                                                                                                                                                                                                                                                                                                                                                                                                                                                                                         |         |          |         |          |          |         |         |          |         |          |          |          |         |          |                                                                                                                                                                                                                        |                                                                                                                                                                                                                                                                                                                                                                                                                                                                                                                                                                                                                                                                                                                                                                                                                                                                                                                                                                                                                                                                                                                                                                                                                                                                                                                                                                                                                                                                                                                                                                                                                                                                                                                                                                                                                                                                                                                                                                                                                                                                                                                                                                                                                                                                                                                                                                                                                                                                                                                                                                                                                                                                                                                                                                                                |   |          |          |          |   |         |          |          |   |          |          |          |   |          |          |          |   |          |          |         |   |          |          |         |   |          |          |          |   |          |          |          |   |          |          |          |   |         |          |         |   |          |          |         |   |          |         |          |   |          |          |          |   |          |         |          |   |          |          |         |   |          |          |          |   |          |          |         |   |          |         |          |   |          |          |          |   |          |         |          |   |          |          |          |   |          |          |          |   |          |          |          |   |          |          |          |   |          |         |         |   |          |         |         |   |         |          |          |   |          |          |          |   |          |          |          |   |          |          |          |   |          |          |         |   |          |          |         |   |         |         |          |   |         |         |          |   |         |         |          |   |         |         |          |   |          |         |          |   |          |          |         |
| C                                                                                                                                                                                                                     | -0.01393                                                                                                                                                                                                                                                                                                                                                                                                                                                                                                                                                                                                                                                                                                                                                                                                                                                                                                                                                                                                                                                                                                                                                                                                                                                                                                                                                                                                                                                                                                                                                                                                                                                                                                                                                                                                                                                                                                                                                                                                                                                                                                                                                                                                                                                                                                                                                                                                                                                                                                                                                                                                                                                                                                                                                                                     | -0.16457 | 0.73239  |          |          |   |          |         |          |   |          |          |          |   |          |          |          |   |          |         |          |   |          |          |          |   |          |          |          |   |          |          |          |   |          |         |          |   |          |          |         |   |                                                                                                                                                                                                                                                                                                                                                                                                                                                                                                                                                                                                                                                                                                                                                                     |          |         |         |          |          |         |         |          |         |          |          |          |          |         |         |          |          |          |         |          |         |         |          |          |          |          |          |          |          |          |          |          |          |          |         |          |          |          |          |          |          |          |   |          |          |          |   |          |          |          |   |          |          |          |   |          |          |         |   |          |          |         |   |          |          |         |   |          |          |         |   |          |          |          |   |          |          |         |   |          |         |         |   |          |         |          |   |          |         |         |   |          |         |         |                                                                                                                                                                                                                       |                                                                                                                                                                                                                                                                                                                                                                                                                                                                                                                                                                                                                                                                                                                                                                                                                                                                                                                                                                                                                                                                                                                                                                                                                                                                                                                                                                                                                                                                                                                                                                                                                                                                                                                                                                                                                                                                                                                                                                                                                                                                                                                                                                                                                                                                                                                                                                                                                                                                                                         |         |          |         |          |          |         |         |          |         |          |          |          |         |          |                                                                                                                                                                                                                        |                                                                                                                                                                                                                                                                                                                                                                                                                                                                                                                                                                                                                                                                                                                                                                                                                                                                                                                                                                                                                                                                                                                                                                                                                                                                                                                                                                                                                                                                                                                                                                                                                                                                                                                                                                                                                                                                                                                                                                                                                                                                                                                                                                                                                                                                                                                                                                                                                                                                                                                                                                                                                                                                                                                                                                                                |   |          |          |          |   |         |          |          |   |          |          |          |   |          |          |          |   |          |          |         |   |          |          |         |   |          |          |          |   |          |          |          |   |          |          |          |   |         |          |         |   |          |          |         |   |          |         |          |   |          |          |          |   |          |         |          |   |          |          |         |   |          |          |          |   |          |          |         |   |          |         |          |   |          |          |          |   |          |         |          |   |          |          |          |   |          |          |          |   |          |          |          |   |          |          |          |   |          |         |         |   |          |         |         |   |         |          |          |   |          |          |          |   |          |          |          |   |          |          |          |   |          |          |         |   |          |          |         |   |         |         |          |   |         |         |          |   |         |         |          |   |         |         |          |   |          |         |          |   |          |          |         |
| C                                                                                                                                                                                                                     | 0.46643                                                                                                                                                                                                                                                                                                                                                                                                                                                                                                                                                                                                                                                                                                                                                                                                                                                                                                                                                                                                                                                                                                                                                                                                                                                                                                                                                                                                                                                                                                                                                                                                                                                                                                                                                                                                                                                                                                                                                                                                                                                                                                                                                                                                                                                                                                                                                                                                                                                                                                                                                                                                                                                                                                                                                                                      | -0.60063 | 3.51575  |          |          |   |          |         |          |   |          |          |          |   |          |          |          |   |          |         |          |   |          |          |          |   |          |          |          |   |          |          |          |   |          |         |          |   |          |          |         |   |                                                                                                                                                                                                                                                                                                                                                                                                                                                                                                                                                                                                                                                                                                                                                                     |          |         |         |          |          |         |         |          |         |          |          |          |          |         |         |          |          |          |         |          |         |         |          |          |          |          |          |          |          |          |          |          |          |          |         |          |          |          |          |          |          |          |   |          |          |          |   |          |          |          |   |          |          |          |   |          |          |         |   |          |          |         |   |          |          |         |   |          |          |         |   |          |          |          |   |          |          |         |   |          |         |         |   |          |         |          |   |          |         |         |   |          |         |         |                                                                                                                                                                                                                       |                                                                                                                                                                                                                                                                                                                                                                                                                                                                                                                                                                                                                                                                                                                                                                                                                                                                                                                                                                                                                                                                                                                                                                                                                                                                                                                                                                                                                                                                                                                                                                                                                                                                                                                                                                                                                                                                                                                                                                                                                                                                                                                                                                                                                                                                                                                                                                                                                                                                                                         |         |          |         |          |          |         |         |          |         |          |          |          |         |          |                                                                                                                                                                                                                        |                                                                                                                                                                                                                                                                                                                                                                                                                                                                                                                                                                                                                                                                                                                                                                                                                                                                                                                                                                                                                                                                                                                                                                                                                                                                                                                                                                                                                                                                                                                                                                                                                                                                                                                                                                                                                                                                                                                                                                                                                                                                                                                                                                                                                                                                                                                                                                                                                                                                                                                                                                                                                                                                                                                                                                                                |   |          |          |          |   |         |          |          |   |          |          |          |   |          |          |          |   |          |          |         |   |          |          |         |   |          |          |          |   |          |          |          |   |          |          |          |   |         |          |         |   |          |          |         |   |          |         |          |   |          |          |          |   |          |         |          |   |          |          |         |   |          |          |          |   |          |          |         |   |          |         |          |   |          |          |          |   |          |         |          |   |          |          |          |   |          |          |          |   |          |          |          |   |          |          |          |   |          |         |         |   |          |         |         |   |         |          |          |   |          |          |          |   |          |          |          |   |          |          |          |   |          |          |         |   |          |          |         |   |         |         |          |   |         |         |          |   |         |         |          |   |         |         |          |   |          |         |          |   |          |          |         |
| C                                                                                                                                                                                                                     | -0.19213                                                                                                                                                                                                                                                                                                                                                                                                                                                                                                                                                                                                                                                                                                                                                                                                                                                                                                                                                                                                                                                                                                                                                                                                                                                                                                                                                                                                                                                                                                                                                                                                                                                                                                                                                                                                                                                                                                                                                                                                                                                                                                                                                                                                                                                                                                                                                                                                                                                                                                                                                                                                                                                                                                                                                                                     | 0.85598  | 1.71492  |          |          |   |          |         |          |   |          |          |          |   |          |          |          |   |          |         |          |   |          |          |          |   |          |          |          |   |          |          |          |   |          |         |          |   |          |          |         |   |                                                                                                                                                                                                                                                                                                                                                                                                                                                                                                                                                                                                                                                                                                                                                                     |          |         |         |          |          |         |         |          |         |          |          |          |          |         |         |          |          |          |         |          |         |         |          |          |          |          |          |          |          |          |          |          |          |          |         |          |          |          |          |          |          |          |   |          |          |          |   |          |          |          |   |          |          |          |   |          |          |         |   |          |          |         |   |          |          |         |   |          |          |         |   |          |          |          |   |          |          |         |   |          |         |         |   |          |         |          |   |          |         |         |   |          |         |         |                                                                                                                                                                                                                       |                                                                                                                                                                                                                                                                                                                                                                                                                                                                                                                                                                                                                                                                                                                                                                                                                                                                                                                                                                                                                                                                                                                                                                                                                                                                                                                                                                                                                                                                                                                                                                                                                                                                                                                                                                                                                                                                                                                                                                                                                                                                                                                                                                                                                                                                                                                                                                                                                                                                                                         |         |          |         |          |          |         |         |          |         |          |          |          |         |          |                                                                                                                                                                                                                        |                                                                                                                                                                                                                                                                                                                                                                                                                                                                                                                                                                                                                                                                                                                                                                                                                                                                                                                                                                                                                                                                                                                                                                                                                                                                                                                                                                                                                                                                                                                                                                                                                                                                                                                                                                                                                                                                                                                                                                                                                                                                                                                                                                                                                                                                                                                                                                                                                                                                                                                                                                                                                                                                                                                                                                                                |   |          |          |          |   |         |          |          |   |          |          |          |   |          |          |          |   |          |          |         |   |          |          |         |   |          |          |          |   |          |          |          |   |          |          |          |   |         |          |         |   |          |          |         |   |          |         |          |   |          |          |          |   |          |         |          |   |          |          |         |   |          |          |          |   |          |          |         |   |          |         |          |   |          |          |          |   |          |         |          |   |          |          |          |   |          |          |          |   |          |          |          |   |          |          |          |   |          |         |         |   |          |         |         |   |         |          |          |   |          |          |          |   |          |          |          |   |          |          |          |   |          |          |         |   |          |          |         |   |         |         |          |   |         |         |          |   |         |         |          |   |         |         |          |   |          |         |          |   |          |          |         |
| C                                                                                                                                                                                                                     | 0.05305                                                                                                                                                                                                                                                                                                                                                                                                                                                                                                                                                                                                                                                                                                                                                                                                                                                                                                                                                                                                                                                                                                                                                                                                                                                                                                                                                                                                                                                                                                                                                                                                                                                                                                                                                                                                                                                                                                                                                                                                                                                                                                                                                                                                                                                                                                                                                                                                                                                                                                                                                                                                                                                                                                                                                                                      | -1.48678 | 1.28372  |          |          |   |          |         |          |   |          |          |          |   |          |          |          |   |          |         |          |   |          |          |          |   |          |          |          |   |          |          |          |   |          |         |          |   |          |          |         |   |                                                                                                                                                                                                                                                                                                                                                                                                                                                                                                                                                                                                                                                                                                                                                                     |          |         |         |          |          |         |         |          |         |          |          |          |          |         |         |          |          |          |         |          |         |         |          |          |          |          |          |          |          |          |          |          |          |          |         |          |          |          |          |          |          |          |   |          |          |          |   |          |          |          |   |          |          |          |   |          |          |         |   |          |          |         |   |          |          |         |   |          |          |         |   |          |          |          |   |          |          |         |   |          |         |         |   |          |         |          |   |          |         |         |   |          |         |         |                                                                                                                                                                                                                       |                                                                                                                                                                                                                                                                                                                                                                                                                                                                                                                                                                                                                                                                                                                                                                                                                                                                                                                                                                                                                                                                                                                                                                                                                                                                                                                                                                                                                                                                                                                                                                                                                                                                                                                                                                                                                                                                                                                                                                                                                                                                                                                                                                                                                                                                                                                                                                                                                                                                                                         |         |          |         |          |          |         |         |          |         |          |          |          |         |          |                                                                                                                                                                                                                        |                                                                                                                                                                                                                                                                                                                                                                                                                                                                                                                                                                                                                                                                                                                                                                                                                                                                                                                                                                                                                                                                                                                                                                                                                                                                                                                                                                                                                                                                                                                                                                                                                                                                                                                                                                                                                                                                                                                                                                                                                                                                                                                                                                                                                                                                                                                                                                                                                                                                                                                                                                                                                                                                                                                                                                                                |   |          |          |          |   |         |          |          |   |          |          |          |   |          |          |          |   |          |          |         |   |          |          |         |   |          |          |          |   |          |          |          |   |          |          |          |   |         |          |         |   |          |          |         |   |          |         |          |   |          |          |          |   |          |         |          |   |          |          |         |   |          |          |          |   |          |          |         |   |          |         |          |   |          |          |          |   |          |         |          |   |          |          |          |   |          |          |          |   |          |          |          |   |          |          |          |   |          |         |         |   |          |         |         |   |         |          |          |   |          |          |          |   |          |          |          |   |          |          |          |   |          |          |         |   |          |          |         |   |         |         |          |   |         |         |          |   |         |         |          |   |         |         |          |   |          |         |          |   |          |          |         |
| C                                                                                                                                                                                                                     | 0.36440                                                                                                                                                                                                                                                                                                                                                                                                                                                                                                                                                                                                                                                                                                                                                                                                                                                                                                                                                                                                                                                                                                                                                                                                                                                                                                                                                                                                                                                                                                                                                                                                                                                                                                                                                                                                                                                                                                                                                                                                                                                                                                                                                                                                                                                                                                                                                                                                                                                                                                                                                                                                                                                                                                                                                                                      | -1.66501 | 2.63744  |          |          |   |          |         |          |   |          |          |          |   |          |          |          |   |          |         |          |   |          |          |          |   |          |          |          |   |          |          |          |   |          |         |          |   |          |          |         |   |                                                                                                                                                                                                                                                                                                                                                                                                                                                                                                                                                                                                                                                                                                                                                                     |          |         |         |          |          |         |         |          |         |          |          |          |          |         |         |          |          |          |         |          |         |         |          |          |          |          |          |          |          |          |          |          |          |          |         |          |          |          |          |          |          |          |   |          |          |          |   |          |          |          |   |          |          |          |   |          |          |         |   |          |          |         |   |          |          |         |   |          |          |         |   |          |          |          |   |          |          |         |   |          |         |         |   |          |         |          |   |          |         |         |   |          |         |         |                                                                                                                                                                                                                       |                                                                                                                                                                                                                                                                                                                                                                                                                                                                                                                                                                                                                                                                                                                                                                                                                                                                                                                                                                                                                                                                                                                                                                                                                                                                                                                                                                                                                                                                                                                                                                                                                                                                                                                                                                                                                                                                                                                                                                                                                                                                                                                                                                                                                                                                                                                                                                                                                                                                                                         |         |          |         |          |          |         |         |          |         |          |          |          |         |          |                                                                                                                                                                                                                        |                                                                                                                                                                                                                                                                                                                                                                                                                                                                                                                                                                                                                                                                                                                                                                                                                                                                                                                                                                                                                                                                                                                                                                                                                                                                                                                                                                                                                                                                                                                                                                                                                                                                                                                                                                                                                                                                                                                                                                                                                                                                                                                                                                                                                                                                                                                                                                                                                                                                                                                                                                                                                                                                                                                                                                                                |   |          |          |          |   |         |          |          |   |          |          |          |   |          |          |          |   |          |          |         |   |          |          |         |   |          |          |          |   |          |          |          |   |          |          |          |   |         |          |         |   |          |          |         |   |          |         |          |   |          |          |          |   |          |         |          |   |          |          |         |   |          |          |          |   |          |          |         |   |          |         |          |   |          |          |          |   |          |         |          |   |          |          |          |   |          |          |          |   |          |          |          |   |          |          |          |   |          |         |         |   |          |         |         |   |         |          |          |   |          |          |          |   |          |          |          |   |          |          |          |   |          |          |         |   |          |          |         |   |         |         |          |   |         |         |          |   |         |         |          |   |         |         |          |   |          |         |          |   |          |          |         |
| C                                                                                                                                                                                                                     | 0.12446                                                                                                                                                                                                                                                                                                                                                                                                                                                                                                                                                                                                                                                                                                                                                                                                                                                                                                                                                                                                                                                                                                                                                                                                                                                                                                                                                                                                                                                                                                                                                                                                                                                                                                                                                                                                                                                                                                                                                                                                                                                                                                                                                                                                                                                                                                                                                                                                                                                                                                                                                                                                                                                                                                                                                                                      | 0.66401  | 3.06147  |          |          |   |          |         |          |   |          |          |          |   |          |          |          |   |          |         |          |   |          |          |          |   |          |          |          |   |          |          |          |   |          |         |          |   |          |          |         |   |                                                                                                                                                                                                                                                                                                                                                                                                                                                                                                                                                                                                                                                                                                                                                                     |          |         |         |          |          |         |         |          |         |          |          |          |          |         |         |          |          |          |         |          |         |         |          |          |          |          |          |          |          |          |          |          |          |          |         |          |          |          |          |          |          |          |   |          |          |          |   |          |          |          |   |          |          |          |   |          |          |         |   |          |          |         |   |          |          |         |   |          |          |         |   |          |          |          |   |          |          |         |   |          |         |         |   |          |         |          |   |          |         |         |   |          |         |         |                                                                                                                                                                                                                       |                                                                                                                                                                                                                                                                                                                                                                                                                                                                                                                                                                                                                                                                                                                                                                                                                                                                                                                                                                                                                                                                                                                                                                                                                                                                                                                                                                                                                                                                                                                                                                                                                                                                                                                                                                                                                                                                                                                                                                                                                                                                                                                                                                                                                                                                                                                                                                                                                                                                                                         |         |          |         |          |          |         |         |          |         |          |          |          |         |          |                                                                                                                                                                                                                        |                                                                                                                                                                                                                                                                                                                                                                                                                                                                                                                                                                                                                                                                                                                                                                                                                                                                                                                                                                                                                                                                                                                                                                                                                                                                                                                                                                                                                                                                                                                                                                                                                                                                                                                                                                                                                                                                                                                                                                                                                                                                                                                                                                                                                                                                                                                                                                                                                                                                                                                                                                                                                                                                                                                                                                                                |   |          |          |          |   |         |          |          |   |          |          |          |   |          |          |          |   |          |          |         |   |          |          |         |   |          |          |          |   |          |          |          |   |          |          |          |   |         |          |         |   |          |          |         |   |          |         |          |   |          |          |          |   |          |         |          |   |          |          |         |   |          |          |          |   |          |          |         |   |          |         |          |   |          |          |          |   |          |         |          |   |          |          |          |   |          |          |          |   |          |          |          |   |          |          |          |   |          |         |         |   |          |         |         |   |         |          |          |   |          |          |          |   |          |          |          |   |          |          |          |   |          |          |         |   |          |          |         |   |         |         |          |   |         |         |          |   |         |         |          |   |         |         |          |   |          |         |          |   |          |          |         |
| H                                                                                                                                                                                                                     | -0.73550                                                                                                                                                                                                                                                                                                                                                                                                                                                                                                                                                                                                                                                                                                                                                                                                                                                                                                                                                                                                                                                                                                                                                                                                                                                                                                                                                                                                                                                                                                                                                                                                                                                                                                                                                                                                                                                                                                                                                                                                                                                                                                                                                                                                                                                                                                                                                                                                                                                                                                                                                                                                                                                                                                                                                                                     | 0.75632  | -4.55693 |          |          |   |          |         |          |   |          |          |          |   |          |          |          |   |          |         |          |   |          |          |          |   |          |          |          |   |          |          |          |   |          |         |          |   |          |          |         |   |                                                                                                                                                                                                                                                                                                                                                                                                                                                                                                                                                                                                                                                                                                                                                                     |          |         |         |          |          |         |         |          |         |          |          |          |          |         |         |          |          |          |         |          |         |         |          |          |          |          |          |          |          |          |          |          |          |          |         |          |          |          |          |          |          |          |   |          |          |          |   |          |          |          |   |          |          |          |   |          |          |         |   |          |          |         |   |          |          |         |   |          |          |         |   |          |          |          |   |          |          |         |   |          |         |         |   |          |         |          |   |          |         |         |   |          |         |         |                                                                                                                                                                                                                       |                                                                                                                                                                                                                                                                                                                                                                                                                                                                                                                                                                                                                                                                                                                                                                                                                                                                                                                                                                                                                                                                                                                                                                                                                                                                                                                                                                                                                                                                                                                                                                                                                                                                                                                                                                                                                                                                                                                                                                                                                                                                                                                                                                                                                                                                                                                                                                                                                                                                                                         |         |          |         |          |          |         |         |          |         |          |          |          |         |          |                                                                                                                                                                                                                        |                                                                                                                                                                                                                                                                                                                                                                                                                                                                                                                                                                                                                                                                                                                                                                                                                                                                                                                                                                                                                                                                                                                                                                                                                                                                                                                                                                                                                                                                                                                                                                                                                                                                                                                                                                                                                                                                                                                                                                                                                                                                                                                                                                                                                                                                                                                                                                                                                                                                                                                                                                                                                                                                                                                                                                                                |   |          |          |          |   |         |          |          |   |          |          |          |   |          |          |          |   |          |          |         |   |          |          |         |   |          |          |          |   |          |          |          |   |          |          |          |   |         |          |         |   |          |          |         |   |          |         |          |   |          |          |          |   |          |         |          |   |          |          |         |   |          |          |          |   |          |          |         |   |          |         |          |   |          |          |          |   |          |         |          |   |          |          |          |   |          |          |          |   |          |          |          |   |          |          |          |   |          |         |         |   |          |         |         |   |         |          |          |   |          |          |          |   |          |          |          |   |          |          |          |   |          |          |         |   |          |          |         |   |         |         |          |   |         |         |          |   |         |         |          |   |         |         |          |   |          |         |          |   |          |          |         |
| H                                                                                                                                                                                                                     | 0.74058                                                                                                                                                                                                                                                                                                                                                                                                                                                                                                                                                                                                                                                                                                                                                                                                                                                                                                                                                                                                                                                                                                                                                                                                                                                                                                                                                                                                                                                                                                                                                                                                                                                                                                                                                                                                                                                                                                                                                                                                                                                                                                                                                                                                                                                                                                                                                                                                                                                                                                                                                                                                                                                                                                                                                                                      | -0.75599 | 4.55517  |          |          |   |          |         |          |   |          |          |          |   |          |          |          |   |          |         |          |   |          |          |          |   |          |          |          |   |          |          |          |   |          |         |          |   |          |          |         |   |                                                                                                                                                                                                                                                                                                                                                                                                                                                                                                                                                                                                                                                                                                                                                                     |          |         |         |          |          |         |         |          |         |          |          |          |          |         |         |          |          |          |         |          |         |         |          |          |          |          |          |          |          |          |          |          |          |          |         |          |          |          |          |          |          |          |   |          |          |          |   |          |          |          |   |          |          |          |   |          |          |         |   |          |          |         |   |          |          |         |   |          |          |         |   |          |          |          |   |          |          |         |   |          |         |         |   |          |         |          |   |          |         |         |   |          |         |         |                                                                                                                                                                                                                       |                                                                                                                                                                                                                                                                                                                                                                                                                                                                                                                                                                                                                                                                                                                                                                                                                                                                                                                                                                                                                                                                                                                                                                                                                                                                                                                                                                                                                                                                                                                                                                                                                                                                                                                                                                                                                                                                                                                                                                                                                                                                                                                                                                                                                                                                                                                                                                                                                                                                                                         |         |          |         |          |          |         |         |          |         |          |          |          |         |          |                                                                                                                                                                                                                        |                                                                                                                                                                                                                                                                                                                                                                                                                                                                                                                                                                                                                                                                                                                                                                                                                                                                                                                                                                                                                                                                                                                                                                                                                                                                                                                                                                                                                                                                                                                                                                                                                                                                                                                                                                                                                                                                                                                                                                                                                                                                                                                                                                                                                                                                                                                                                                                                                                                                                                                                                                                                                                                                                                                                                                                                |   |          |          |          |   |         |          |          |   |          |          |          |   |          |          |          |   |          |          |         |   |          |          |         |   |          |          |          |   |          |          |          |   |          |          |          |   |         |          |         |   |          |          |         |   |          |         |          |   |          |          |          |   |          |         |          |   |          |          |         |   |          |          |          |   |          |          |         |   |          |         |          |   |          |          |          |   |          |         |          |   |          |          |          |   |          |          |          |   |          |          |          |   |          |          |          |   |          |         |         |   |          |         |         |   |         |          |          |   |          |          |          |   |          |          |          |   |          |          |          |   |          |          |         |   |          |          |         |   |         |         |          |   |         |         |          |   |         |         |          |   |         |         |          |   |          |         |          |   |          |          |         |
| H                                                                                                                                                                                                                     | 0.49425                                                                                                                                                                                                                                                                                                                                                                                                                                                                                                                                                                                                                                                                                                                                                                                                                                                                                                                                                                                                                                                                                                                                                                                                                                                                                                                                                                                                                                                                                                                                                                                                                                                                                                                                                                                                                                                                                                                                                                                                                                                                                                                                                                                                                                                                                                                                                                                                                                                                                                                                                                                                                                                                                                                                                                                      | -2.68507 | 2.97381  |          |          |   |          |         |          |   |          |          |          |   |          |          |          |   |          |         |          |   |          |          |          |   |          |          |          |   |          |          |          |   |          |         |          |   |          |          |         |   |                                                                                                                                                                                                                                                                                                                                                                                                                                                                                                                                                                                                                                                                                                                                                                     |          |         |         |          |          |         |         |          |         |          |          |          |          |         |         |          |          |          |         |          |         |         |          |          |          |          |          |          |          |          |          |          |          |          |         |          |          |          |          |          |          |          |   |          |          |          |   |          |          |          |   |          |          |          |   |          |          |         |   |          |          |         |   |          |          |         |   |          |          |         |   |          |          |          |   |          |          |         |   |          |         |         |   |          |         |          |   |          |         |         |   |          |         |         |                                                                                                                                                                                                                       |                                                                                                                                                                                                                                                                                                                                                                                                                                                                                                                                                                                                                                                                                                                                                                                                                                                                                                                                                                                                                                                                                                                                                                                                                                                                                                                                                                                                                                                                                                                                                                                                                                                                                                                                                                                                                                                                                                                                                                                                                                                                                                                                                                                                                                                                                                                                                                                                                                                                                                         |         |          |         |          |          |         |         |          |         |          |          |          |         |          |                                                                                                                                                                                                                        |                                                                                                                                                                                                                                                                                                                                                                                                                                                                                                                                                                                                                                                                                                                                                                                                                                                                                                                                                                                                                                                                                                                                                                                                                                                                                                                                                                                                                                                                                                                                                                                                                                                                                                                                                                                                                                                                                                                                                                                                                                                                                                                                                                                                                                                                                                                                                                                                                                                                                                                                                                                                                                                                                                                                                                                                |   |          |          |          |   |         |          |          |   |          |          |          |   |          |          |          |   |          |          |         |   |          |          |         |   |          |          |          |   |          |          |          |   |          |          |          |   |         |          |         |   |          |          |         |   |          |         |          |   |          |          |          |   |          |         |          |   |          |          |         |   |          |          |          |   |          |          |         |   |          |         |          |   |          |          |          |   |          |         |          |   |          |          |          |   |          |          |          |   |          |          |          |   |          |          |          |   |          |         |         |   |          |         |         |   |         |          |          |   |          |          |          |   |          |          |          |   |          |          |          |   |          |          |         |   |          |          |         |   |         |         |          |   |         |         |          |   |         |         |          |   |         |         |          |   |          |         |          |   |          |          |         |
| H                                                                                                                                                                                                                     | -0.49217                                                                                                                                                                                                                                                                                                                                                                                                                                                                                                                                                                                                                                                                                                                                                                                                                                                                                                                                                                                                                                                                                                                                                                                                                                                                                                                                                                                                                                                                                                                                                                                                                                                                                                                                                                                                                                                                                                                                                                                                                                                                                                                                                                                                                                                                                                                                                                                                                                                                                                                                                                                                                                                                                                                                                                                     | 2.68467  | -2.97462 |          |          |   |          |         |          |   |          |          |          |   |          |          |          |   |          |         |          |   |          |          |          |   |          |          |          |   |          |          |          |   |          |         |          |   |          |          |         |   |                                                                                                                                                                                                                                                                                                                                                                                                                                                                                                                                                                                                                                                                                                                                                                     |          |         |         |          |          |         |         |          |         |          |          |          |          |         |         |          |          |          |         |          |         |         |          |          |          |          |          |          |          |          |          |          |          |          |         |          |          |          |          |          |          |          |   |          |          |          |   |          |          |          |   |          |          |          |   |          |          |         |   |          |          |         |   |          |          |         |   |          |          |         |   |          |          |          |   |          |          |         |   |          |         |         |   |          |         |          |   |          |         |         |   |          |         |         |                                                                                                                                                                                                                       |                                                                                                                                                                                                                                                                                                                                                                                                                                                                                                                                                                                                                                                                                                                                                                                                                                                                                                                                                                                                                                                                                                                                                                                                                                                                                                                                                                                                                                                                                                                                                                                                                                                                                                                                                                                                                                                                                                                                                                                                                                                                                                                                                                                                                                                                                                                                                                                                                                                                                                         |         |          |         |          |          |         |         |          |         |          |          |          |         |          |                                                                                                                                                                                                                        |                                                                                                                                                                                                                                                                                                                                                                                                                                                                                                                                                                                                                                                                                                                                                                                                                                                                                                                                                                                                                                                                                                                                                                                                                                                                                                                                                                                                                                                                                                                                                                                                                                                                                                                                                                                                                                                                                                                                                                                                                                                                                                                                                                                                                                                                                                                                                                                                                                                                                                                                                                                                                                                                                                                                                                                                |   |          |          |          |   |         |          |          |   |          |          |          |   |          |          |          |   |          |          |         |   |          |          |         |   |          |          |          |   |          |          |          |   |          |          |          |   |         |          |         |   |          |          |         |   |          |         |          |   |          |          |          |   |          |         |          |   |          |          |         |   |          |          |          |   |          |          |         |   |          |         |          |   |          |          |          |   |          |         |          |   |          |          |          |   |          |          |          |   |          |          |          |   |          |          |          |   |          |         |         |   |          |         |         |   |         |          |          |   |          |          |          |   |          |          |          |   |          |          |          |   |          |          |         |   |          |          |         |   |         |         |          |   |         |         |          |   |         |         |          |   |         |         |          |   |          |         |          |   |          |          |         |
| H                                                                                                                                                                                                                     | -0.05954                                                                                                                                                                                                                                                                                                                                                                                                                                                                                                                                                                                                                                                                                                                                                                                                                                                                                                                                                                                                                                                                                                                                                                                                                                                                                                                                                                                                                                                                                                                                                                                                                                                                                                                                                                                                                                                                                                                                                                                                                                                                                                                                                                                                                                                                                                                                                                                                                                                                                                                                                                                                                                                                                                                                                                                     | -1.49732 | -3.74757 |          |          |   |          |         |          |   |          |          |          |   |          |          |          |   |          |         |          |   |          |          |          |   |          |          |          |   |          |          |          |   |          |         |          |   |          |          |         |   |                                                                                                                                                                                                                                                                                                                                                                                                                                                                                                                                                                                                                                                                                                                                                                     |          |         |         |          |          |         |         |          |         |          |          |          |          |         |         |          |          |          |         |          |         |         |          |          |          |          |          |          |          |          |          |          |          |          |         |          |          |          |          |          |          |          |   |          |          |          |   |          |          |          |   |          |          |          |   |          |          |         |   |          |          |         |   |          |          |         |   |          |          |         |   |          |          |          |   |          |          |         |   |          |         |         |   |          |         |          |   |          |         |         |   |          |         |         |                                                                                                                                                                                                                       |                                                                                                                                                                                                                                                                                                                                                                                                                                                                                                                                                                                                                                                                                                                                                                                                                                                                                                                                                                                                                                                                                                                                                                                                                                                                                                                                                                                                                                                                                                                                                                                                                                                                                                                                                                                                                                                                                                                                                                                                                                                                                                                                                                                                                                                                                                                                                                                                                                                                                                         |         |          |         |          |          |         |         |          |         |          |          |          |         |          |                                                                                                                                                                                                                        |                                                                                                                                                                                                                                                                                                                                                                                                                                                                                                                                                                                                                                                                                                                                                                                                                                                                                                                                                                                                                                                                                                                                                                                                                                                                                                                                                                                                                                                                                                                                                                                                                                                                                                                                                                                                                                                                                                                                                                                                                                                                                                                                                                                                                                                                                                                                                                                                                                                                                                                                                                                                                                                                                                                                                                                                |   |          |          |          |   |         |          |          |   |          |          |          |   |          |          |          |   |          |          |         |   |          |          |         |   |          |          |          |   |          |          |          |   |          |          |          |   |         |          |         |   |          |          |         |   |          |         |          |   |          |          |          |   |          |         |          |   |          |          |         |   |          |          |          |   |          |          |         |   |          |         |          |   |          |          |          |   |          |         |          |   |          |          |          |   |          |          |          |   |          |          |          |   |          |          |          |   |          |         |         |   |          |         |         |   |         |          |          |   |          |          |          |   |          |          |          |   |          |          |          |   |          |          |         |   |          |          |         |   |         |         |          |   |         |         |          |   |         |         |          |   |         |         |          |   |          |         |          |   |          |          |         |
| H                                                                                                                                                                                                                     | 0.06310                                                                                                                                                                                                                                                                                                                                                                                                                                                                                                                                                                                                                                                                                                                                                                                                                                                                                                                                                                                                                                                                                                                                                                                                                                                                                                                                                                                                                                                                                                                                                                                                                                                                                                                                                                                                                                                                                                                                                                                                                                                                                                                                                                                                                                                                                                                                                                                                                                                                                                                                                                                                                                                                                                                                                                                      | 1.49716  | 3.74611  |          |          |   |          |         |          |   |          |          |          |   |          |          |          |   |          |         |          |   |          |          |          |   |          |          |          |   |          |          |          |   |          |         |          |   |          |          |         |   |                                                                                                                                                                                                                                                                                                                                                                                                                                                                                                                                                                                                                                                                                                                                                                     |          |         |         |          |          |         |         |          |         |          |          |          |          |         |         |          |          |          |         |          |         |         |          |          |          |          |          |          |          |          |          |          |          |          |         |          |          |          |          |          |          |          |   |          |          |          |   |          |          |          |   |          |          |          |   |          |          |         |   |          |          |         |   |          |          |         |   |          |          |         |   |          |          |          |   |          |          |         |   |          |         |         |   |          |         |          |   |          |         |         |   |          |         |         |                                                                                                                                                                                                                       |                                                                                                                                                                                                                                                                                                                                                                                                                                                                                                                                                                                                                                                                                                                                                                                                                                                                                                                                                                                                                                                                                                                                                                                                                                                                                                                                                                                                                                                                                                                                                                                                                                                                                                                                                                                                                                                                                                                                                                                                                                                                                                                                                                                                                                                                                                                                                                                                                                                                                                         |         |          |         |          |          |         |         |          |         |          |          |          |         |          |                                                                                                                                                                                                                        |                                                                                                                                                                                                                                                                                                                                                                                                                                                                                                                                                                                                                                                                                                                                                                                                                                                                                                                                                                                                                                                                                                                                                                                                                                                                                                                                                                                                                                                                                                                                                                                                                                                                                                                                                                                                                                                                                                                                                                                                                                                                                                                                                                                                                                                                                                                                                                                                                                                                                                                                                                                                                                                                                                                                                                                                |   |          |          |          |   |         |          |          |   |          |          |          |   |          |          |          |   |          |          |         |   |          |          |         |   |          |          |          |   |          |          |          |   |          |          |          |   |         |          |         |   |          |          |         |   |          |         |          |   |          |          |          |   |          |         |          |   |          |          |         |   |          |          |          |   |          |          |         |   |          |         |          |   |          |          |          |   |          |         |          |   |          |          |          |   |          |          |          |   |          |          |          |   |          |          |          |   |          |         |         |   |          |         |         |   |         |          |          |   |          |          |          |   |          |          |          |   |          |          |          |   |          |          |         |   |          |          |         |   |         |         |          |   |         |         |          |   |         |         |          |   |         |         |          |   |          |         |          |   |          |          |         |
| C                                                                                                                                                                                                                     | -0.42826                                                                                                                                                                                                                                                                                                                                                                                                                                                                                                                                                                                                                                                                                                                                                                                                                                                                                                                                                                                                                                                                                                                                                                                                                                                                                                                                                                                                                                                                                                                                                                                                                                                                                                                                                                                                                                                                                                                                                                                                                                                                                                                                                                                                                                                                                                                                                                                                                                                                                                                                                                                                                                                                                                                                                                                     | -2.81306 | 0.62965  |          |          |   |          |         |          |   |          |          |          |   |          |          |          |   |          |         |          |   |          |          |          |   |          |          |          |   |          |          |          |   |          |         |          |   |          |          |         |   |                                                                                                                                                                                                                                                                                                                                                                                                                                                                                                                                                                                                                                                                                                                                                                     |          |         |         |          |          |         |         |          |         |          |          |          |          |         |         |          |          |          |         |          |         |         |          |          |          |          |          |          |          |          |          |          |          |          |         |          |          |          |          |          |          |          |   |          |          |          |   |          |          |          |   |          |          |          |   |          |          |         |   |          |          |         |   |          |          |         |   |          |          |         |   |          |          |          |   |          |          |         |   |          |         |         |   |          |         |          |   |          |         |         |   |          |         |         |                                                                                                                                                                                                                       |                                                                                                                                                                                                                                                                                                                                                                                                                                                                                                                                                                                                                                                                                                                                                                                                                                                                                                                                                                                                                                                                                                                                                                                                                                                                                                                                                                                                                                                                                                                                                                                                                                                                                                                                                                                                                                                                                                                                                                                                                                                                                                                                                                                                                                                                                                                                                                                                                                                                                                         |         |          |         |          |          |         |         |          |         |          |          |          |         |          |                                                                                                                                                                                                                        |                                                                                                                                                                                                                                                                                                                                                                                                                                                                                                                                                                                                                                                                                                                                                                                                                                                                                                                                                                                                                                                                                                                                                                                                                                                                                                                                                                                                                                                                                                                                                                                                                                                                                                                                                                                                                                                                                                                                                                                                                                                                                                                                                                                                                                                                                                                                                                                                                                                                                                                                                                                                                                                                                                                                                                                                |   |          |          |          |   |         |          |          |   |          |          |          |   |          |          |          |   |          |          |         |   |          |          |         |   |          |          |          |   |          |          |          |   |          |          |          |   |         |          |         |   |          |          |         |   |          |         |          |   |          |          |          |   |          |         |          |   |          |          |         |   |          |          |          |   |          |          |         |   |          |         |          |   |          |          |          |   |          |         |          |   |          |          |          |   |          |          |          |   |          |          |          |   |          |          |          |   |          |         |         |   |          |         |         |   |         |          |          |   |          |          |          |   |          |          |          |   |          |          |          |   |          |          |         |   |          |          |         |   |         |         |          |   |         |         |          |   |         |         |          |   |         |         |          |   |          |         |          |   |          |          |         |
| O                                                                                                                                                                                                                     | 0.25471                                                                                                                                                                                                                                                                                                                                                                                                                                                                                                                                                                                                                                                                                                                                                                                                                                                                                                                                                                                                                                                                                                                                                                                                                                                                                                                                                                                                                                                                                                                                                                                                                                                                                                                                                                                                                                                                                                                                                                                                                                                                                                                                                                                                                                                                                                                                                                                                                                                                                                                                                                                                                                                                                                                                                                                      | -3.84204 | 0.85360  |          |          |   |          |         |          |   |          |          |          |   |          |          |          |   |          |         |          |   |          |          |          |   |          |          |          |   |          |          |          |   |          |         |          |   |          |          |         |   |                                                                                                                                                                                                                                                                                                                                                                                                                                                                                                                                                                                                                                                                                                                                                                     |          |         |         |          |          |         |         |          |         |          |          |          |          |         |         |          |          |          |         |          |         |         |          |          |          |          |          |          |          |          |          |          |          |          |         |          |          |          |          |          |          |          |   |          |          |          |   |          |          |          |   |          |          |          |   |          |          |         |   |          |          |         |   |          |          |         |   |          |          |         |   |          |          |          |   |          |          |         |   |          |         |         |   |          |         |          |   |          |         |         |   |          |         |         |                                                                                                                                                                                                                       |                                                                                                                                                                                                                                                                                                                                                                                                                                                                                                                                                                                                                                                                                                                                                                                                                                                                                                                                                                                                                                                                                                                                                                                                                                                                                                                                                                                                                                                                                                                                                                                                                                                                                                                                                                                                                                                                                                                                                                                                                                                                                                                                                                                                                                                                                                                                                                                                                                                                                                         |         |          |         |          |          |         |         |          |         |          |          |          |         |          |                                                                                                                                                                                                                        |                                                                                                                                                                                                                                                                                                                                                                                                                                                                                                                                                                                                                                                                                                                                                                                                                                                                                                                                                                                                                                                                                                                                                                                                                                                                                                                                                                                                                                                                                                                                                                                                                                                                                                                                                                                                                                                                                                                                                                                                                                                                                                                                                                                                                                                                                                                                                                                                                                                                                                                                                                                                                                                                                                                                                                                                |   |          |          |          |   |         |          |          |   |          |          |          |   |          |          |          |   |          |          |         |   |          |          |         |   |          |          |          |   |          |          |          |   |          |          |          |   |         |          |         |   |          |          |         |   |          |         |          |   |          |          |          |   |          |         |          |   |          |          |         |   |          |          |          |   |          |          |         |   |          |         |          |   |          |          |          |   |          |         |          |   |          |          |          |   |          |          |          |   |          |          |          |   |          |          |          |   |          |         |         |   |          |         |         |   |         |          |          |   |          |          |          |   |          |          |          |   |          |          |          |   |          |          |         |   |          |          |         |   |         |         |          |   |         |         |          |   |         |         |          |   |         |         |          |   |          |         |          |   |          |          |         |
| O                                                                                                                                                                                                                     | -1.53011                                                                                                                                                                                                                                                                                                                                                                                                                                                                                                                                                                                                                                                                                                                                                                                                                                                                                                                                                                                                                                                                                                                                                                                                                                                                                                                                                                                                                                                                                                                                                                                                                                                                                                                                                                                                                                                                                                                                                                                                                                                                                                                                                                                                                                                                                                                                                                                                                                                                                                                                                                                                                                                                                                                                                                                     | -2.73294 | 0.04229  |          |          |   |          |         |          |   |          |          |          |   |          |          |          |   |          |         |          |   |          |          |          |   |          |          |          |   |          |          |          |   |          |         |          |   |          |          |         |   |                                                                                                                                                                                                                                                                                                                                                                                                                                                                                                                                                                                                                                                                                                                                                                     |          |         |         |          |          |         |         |          |         |          |          |          |          |         |         |          |          |          |         |          |         |         |          |          |          |          |          |          |          |          |          |          |          |          |         |          |          |          |          |          |          |          |   |          |          |          |   |          |          |          |   |          |          |          |   |          |          |         |   |          |          |         |   |          |          |         |   |          |          |         |   |          |          |          |   |          |          |         |   |          |         |         |   |          |         |          |   |          |         |         |   |          |         |         |                                                                                                                                                                                                                       |                                                                                                                                                                                                                                                                                                                                                                                                                                                                                                                                                                                                                                                                                                                                                                                                                                                                                                                                                                                                                                                                                                                                                                                                                                                                                                                                                                                                                                                                                                                                                                                                                                                                                                                                                                                                                                                                                                                                                                                                                                                                                                                                                                                                                                                                                                                                                                                                                                                                                                         |         |          |         |          |          |         |         |          |         |          |          |          |         |          |                                                                                                                                                                                                                        |                                                                                                                                                                                                                                                                                                                                                                                                                                                                                                                                                                                                                                                                                                                                                                                                                                                                                                                                                                                                                                                                                                                                                                                                                                                                                                                                                                                                                                                                                                                                                                                                                                                                                                                                                                                                                                                                                                                                                                                                                                                                                                                                                                                                                                                                                                                                                                                                                                                                                                                                                                                                                                                                                                                                                                                                |   |          |          |          |   |         |          |          |   |          |          |          |   |          |          |          |   |          |          |         |   |          |          |         |   |          |          |          |   |          |          |          |   |          |          |          |   |         |          |         |   |          |          |         |   |          |         |          |   |          |          |          |   |          |         |          |   |          |          |         |   |          |          |          |   |          |          |         |   |          |         |          |   |          |          |          |   |          |         |          |   |          |          |          |   |          |          |          |   |          |          |          |   |          |          |          |   |          |         |         |   |          |         |         |   |         |          |          |   |          |          |          |   |          |          |          |   |          |          |          |   |          |          |         |   |          |          |         |   |         |         |          |   |         |         |          |   |         |         |          |   |         |         |          |   |          |         |          |   |          |          |         |
| C                                                                                                                                                                                                                     | 0.42674                                                                                                                                                                                                                                                                                                                                                                                                                                                                                                                                                                                                                                                                                                                                                                                                                                                                                                                                                                                                                                                                                                                                                                                                                                                                                                                                                                                                                                                                                                                                                                                                                                                                                                                                                                                                                                                                                                                                                                                                                                                                                                                                                                                                                                                                                                                                                                                                                                                                                                                                                                                                                                                                                                                                                                                      | 2.81256  | -0.62954 |          |          |   |          |         |          |   |          |          |          |   |          |          |          |   |          |         |          |   |          |          |          |   |          |          |          |   |          |          |          |   |          |         |          |   |          |          |         |   |                                                                                                                                                                                                                                                                                                                                                                                                                                                                                                                                                                                                                                                                                                                                                                     |          |         |         |          |          |         |         |          |         |          |          |          |          |         |         |          |          |          |         |          |         |         |          |          |          |          |          |          |          |          |          |          |          |          |         |          |          |          |          |          |          |          |   |          |          |          |   |          |          |          |   |          |          |          |   |          |          |         |   |          |          |         |   |          |          |         |   |          |          |         |   |          |          |          |   |          |          |         |   |          |         |         |   |          |         |          |   |          |         |         |   |          |         |         |                                                                                                                                                                                                                       |                                                                                                                                                                                                                                                                                                                                                                                                                                                                                                                                                                                                                                                                                                                                                                                                                                                                                                                                                                                                                                                                                                                                                                                                                                                                                                                                                                                                                                                                                                                                                                                                                                                                                                                                                                                                                                                                                                                                                                                                                                                                                                                                                                                                                                                                                                                                                                                                                                                                                                         |         |          |         |          |          |         |         |          |         |          |          |          |         |          |                                                                                                                                                                                                                        |                                                                                                                                                                                                                                                                                                                                                                                                                                                                                                                                                                                                                                                                                                                                                                                                                                                                                                                                                                                                                                                                                                                                                                                                                                                                                                                                                                                                                                                                                                                                                                                                                                                                                                                                                                                                                                                                                                                                                                                                                                                                                                                                                                                                                                                                                                                                                                                                                                                                                                                                                                                                                                                                                                                                                                                                |   |          |          |          |   |         |          |          |   |          |          |          |   |          |          |          |   |          |          |         |   |          |          |         |   |          |          |          |   |          |          |          |   |          |          |          |   |         |          |         |   |          |          |         |   |          |         |          |   |          |          |          |   |          |         |          |   |          |          |         |   |          |          |          |   |          |          |         |   |          |         |          |   |          |          |          |   |          |         |          |   |          |          |          |   |          |          |          |   |          |          |          |   |          |          |          |   |          |         |         |   |          |         |         |   |         |          |          |   |          |          |          |   |          |          |          |   |          |          |          |   |          |          |         |   |          |          |         |   |         |         |          |   |         |         |          |   |         |         |          |   |         |         |          |   |          |         |          |   |          |          |         |
| O                                                                                                                                                                                                                     | 1.52936                                                                                                                                                                                                                                                                                                                                                                                                                                                                                                                                                                                                                                                                                                                                                                                                                                                                                                                                                                                                                                                                                                                                                                                                                                                                                                                                                                                                                                                                                                                                                                                                                                                                                                                                                                                                                                                                                                                                                                                                                                                                                                                                                                                                                                                                                                                                                                                                                                                                                                                                                                                                                                                                                                                                                                                      | 2.73399  | -0.04373 |          |          |   |          |         |          |   |          |          |          |   |          |          |          |   |          |         |          |   |          |          |          |   |          |          |          |   |          |          |          |   |          |         |          |   |          |          |         |   |                                                                                                                                                                                                                                                                                                                                                                                                                                                                                                                                                                                                                                                                                                                                                                     |          |         |         |          |          |         |         |          |         |          |          |          |          |         |         |          |          |          |         |          |         |         |          |          |          |          |          |          |          |          |          |          |          |          |         |          |          |          |          |          |          |          |   |          |          |          |   |          |          |          |   |          |          |          |   |          |          |         |   |          |          |         |   |          |          |         |   |          |          |         |   |          |          |          |   |          |          |         |   |          |         |         |   |          |         |          |   |          |         |         |   |          |         |         |                                                                                                                                                                                                                       |                                                                                                                                                                                                                                                                                                                                                                                                                                                                                                                                                                                                                                                                                                                                                                                                                                                                                                                                                                                                                                                                                                                                                                                                                                                                                                                                                                                                                                                                                                                                                                                                                                                                                                                                                                                                                                                                                                                                                                                                                                                                                                                                                                                                                                                                                                                                                                                                                                                                                                         |         |          |         |          |          |         |         |          |         |          |          |          |         |          |                                                                                                                                                                                                                        |                                                                                                                                                                                                                                                                                                                                                                                                                                                                                                                                                                                                                                                                                                                                                                                                                                                                                                                                                                                                                                                                                                                                                                                                                                                                                                                                                                                                                                                                                                                                                                                                                                                                                                                                                                                                                                                                                                                                                                                                                                                                                                                                                                                                                                                                                                                                                                                                                                                                                                                                                                                                                                                                                                                                                                                                |   |          |          |          |   |         |          |          |   |          |          |          |   |          |          |          |   |          |          |         |   |          |          |         |   |          |          |          |   |          |          |          |   |          |          |          |   |         |          |         |   |          |          |         |   |          |         |          |   |          |          |          |   |          |         |          |   |          |          |         |   |          |          |          |   |          |          |         |   |          |         |          |   |          |          |          |   |          |         |          |   |          |          |          |   |          |          |          |   |          |          |          |   |          |          |          |   |          |         |         |   |          |         |         |   |         |          |          |   |          |          |          |   |          |          |          |   |          |          |          |   |          |          |         |   |          |          |         |   |         |         |          |   |         |         |          |   |         |         |          |   |         |         |          |   |          |         |          |   |          |          |         |
| O                                                                                                                                                                                                                     | -0.25846                                                                                                                                                                                                                                                                                                                                                                                                                                                                                                                                                                                                                                                                                                                                                                                                                                                                                                                                                                                                                                                                                                                                                                                                                                                                                                                                                                                                                                                                                                                                                                                                                                                                                                                                                                                                                                                                                                                                                                                                                                                                                                                                                                                                                                                                                                                                                                                                                                                                                                                                                                                                                                                                                                                                                                                     | 3.84049  | -0.85165 |          |          |   |          |         |          |   |          |          |          |   |          |          |          |   |          |         |          |   |          |          |          |   |          |          |          |   |          |          |          |   |          |         |          |   |          |          |         |   |                                                                                                                                                                                                                                                                                                                                                                                                                                                                                                                                                                                                                                                                                                                                                                     |          |         |         |          |          |         |         |          |         |          |          |          |          |         |         |          |          |          |         |          |         |         |          |          |          |          |          |          |          |          |          |          |          |          |         |          |          |          |          |          |          |          |   |          |          |          |   |          |          |          |   |          |          |          |   |          |          |         |   |          |          |         |   |          |          |         |   |          |          |         |   |          |          |          |   |          |          |         |   |          |         |         |   |          |         |          |   |          |         |         |   |          |         |         |                                                                                                                                                                                                                       |                                                                                                                                                                                                                                                                                                                                                                                                                                                                                                                                                                                                                                                                                                                                                                                                                                                                                                                                                                                                                                                                                                                                                                                                                                                                                                                                                                                                                                                                                                                                                                                                                                                                                                                                                                                                                                                                                                                                                                                                                                                                                                                                                                                                                                                                                                                                                                                                                                                                                                         |         |          |         |          |          |         |         |          |         |          |          |          |         |          |                                                                                                                                                                                                                        |                                                                                                                                                                                                                                                                                                                                                                                                                                                                                                                                                                                                                                                                                                                                                                                                                                                                                                                                                                                                                                                                                                                                                                                                                                                                                                                                                                                                                                                                                                                                                                                                                                                                                                                                                                                                                                                                                                                                                                                                                                                                                                                                                                                                                                                                                                                                                                                                                                                                                                                                                                                                                                                                                                                                                                                                |   |          |          |          |   |         |          |          |   |          |          |          |   |          |          |          |   |          |          |         |   |          |          |         |   |          |          |          |   |          |          |          |   |          |          |          |   |         |          |         |   |          |          |         |   |          |         |          |   |          |          |          |   |          |         |          |   |          |          |         |   |          |          |          |   |          |          |         |   |          |         |          |   |          |          |          |   |          |         |          |   |          |          |          |   |          |          |          |   |          |          |          |   |          |          |          |   |          |         |         |   |          |         |         |   |         |          |          |   |          |          |          |   |          |          |          |   |          |          |          |   |          |          |         |   |          |          |         |   |         |         |          |   |         |         |          |   |         |         |          |   |         |         |          |   |          |         |          |   |          |          |         |
| O                                                                                                                                                                                                                     | 0.80428                                                                                                                                                                                                                                                                                                                                                                                                                                                                                                                                                                                                                                                                                                                                                                                                                                                                                                                                                                                                                                                                                                                                                                                                                                                                                                                                                                                                                                                                                                                                                                                                                                                                                                                                                                                                                                                                                                                                                                                                                                                                                                                                                                                                                                                                                                                                                                                                                                                                                                                                                                                                                                                                                                                                                                                      | -2.00947 | -1.33349 |          |          |   |          |         |          |   |          |          |          |   |          |          |          |   |          |         |          |   |          |          |          |   |          |          |          |   |          |          |          |   |          |         |          |   |          |          |         |   |                                                                                                                                                                                                                                                                                                                                                                                                                                                                                                                                                                                                                                                                                                                                                                     |          |         |         |          |          |         |         |          |         |          |          |          |          |         |         |          |          |          |         |          |         |         |          |          |          |          |          |          |          |          |          |          |          |          |         |          |          |          |          |          |          |          |   |          |          |          |   |          |          |          |   |          |          |          |   |          |          |         |   |          |          |         |   |          |          |         |   |          |          |         |   |          |          |          |   |          |          |         |   |          |         |         |   |          |         |          |   |          |         |         |   |          |         |         |                                                                                                                                                                                                                       |                                                                                                                                                                                                                                                                                                                                                                                                                                                                                                                                                                                                                                                                                                                                                                                                                                                                                                                                                                                                                                                                                                                                                                                                                                                                                                                                                                                                                                                                                                                                                                                                                                                                                                                                                                                                                                                                                                                                                                                                                                                                                                                                                                                                                                                                                                                                                                                                                                                                                                         |         |          |         |          |          |         |         |          |         |          |          |          |         |          |                                                                                                                                                                                                                        |                                                                                                                                                                                                                                                                                                                                                                                                                                                                                                                                                                                                                                                                                                                                                                                                                                                                                                                                                                                                                                                                                                                                                                                                                                                                                                                                                                                                                                                                                                                                                                                                                                                                                                                                                                                                                                                                                                                                                                                                                                                                                                                                                                                                                                                                                                                                                                                                                                                                                                                                                                                                                                                                                                                                                                                                |   |          |          |          |   |         |          |          |   |          |          |          |   |          |          |          |   |          |          |         |   |          |          |         |   |          |          |          |   |          |          |          |   |          |          |          |   |         |          |         |   |          |          |         |   |          |         |          |   |          |          |          |   |          |         |          |   |          |          |         |   |          |          |          |   |          |          |         |   |          |         |          |   |          |          |          |   |          |         |          |   |          |          |          |   |          |          |          |   |          |          |          |   |          |          |          |   |          |         |         |   |          |         |         |   |         |          |          |   |          |          |          |   |          |          |          |   |          |          |          |   |          |          |         |   |          |          |         |   |         |         |          |   |         |         |          |   |         |         |          |   |         |         |          |   |          |         |          |   |          |          |         |
| O                                                                                                                                                                                                                     | -0.80507                                                                                                                                                                                                                                                                                                                                                                                                                                                                                                                                                                                                                                                                                                                                                                                                                                                                                                                                                                                                                                                                                                                                                                                                                                                                                                                                                                                                                                                                                                                                                                                                                                                                                                                                                                                                                                                                                                                                                                                                                                                                                                                                                                                                                                                                                                                                                                                                                                                                                                                                                                                                                                                                                                                                                                                     | 2.00758  | 1.33250  |          |          |   |          |         |          |   |          |          |          |   |          |          |          |   |          |         |          |   |          |          |          |   |          |          |          |   |          |          |          |   |          |         |          |   |          |          |         |   |                                                                                                                                                                                                                                                                                                                                                                                                                                                                                                                                                                                                                                                                                                                                                                     |          |         |         |          |          |         |         |          |         |          |          |          |          |         |         |          |          |          |         |          |         |         |          |          |          |          |          |          |          |          |          |          |          |          |         |          |          |          |          |          |          |          |   |          |          |          |   |          |          |          |   |          |          |          |   |          |          |         |   |          |          |         |   |          |          |         |   |          |          |         |   |          |          |          |   |          |          |         |   |          |         |         |   |          |         |          |   |          |         |         |   |          |         |         |                                                                                                                                                                                                                       |                                                                                                                                                                                                                                                                                                                                                                                                                                                                                                                                                                                                                                                                                                                                                                                                                                                                                                                                                                                                                                                                                                                                                                                                                                                                                                                                                                                                                                                                                                                                                                                                                                                                                                                                                                                                                                                                                                                                                                                                                                                                                                                                                                                                                                                                                                                                                                                                                                                                                                         |         |          |         |          |          |         |         |          |         |          |          |          |         |          |                                                                                                                                                                                                                        |                                                                                                                                                                                                                                                                                                                                                                                                                                                                                                                                                                                                                                                                                                                                                                                                                                                                                                                                                                                                                                                                                                                                                                                                                                                                                                                                                                                                                                                                                                                                                                                                                                                                                                                                                                                                                                                                                                                                                                                                                                                                                                                                                                                                                                                                                                                                                                                                                                                                                                                                                                                                                                                                                                                                                                                                |   |          |          |          |   |         |          |          |   |          |          |          |   |          |          |          |   |          |          |         |   |          |          |         |   |          |          |          |   |          |          |          |   |          |          |          |   |         |          |         |   |          |          |         |   |          |         |          |   |          |          |          |   |          |         |          |   |          |          |         |   |          |          |          |   |          |          |         |   |          |         |          |   |          |          |          |   |          |         |          |   |          |          |          |   |          |          |          |   |          |          |          |   |          |          |          |   |          |         |         |   |          |         |         |   |         |          |          |   |          |          |          |   |          |          |          |   |          |          |          |   |          |          |         |   |          |          |         |   |         |         |          |   |         |         |          |   |         |         |          |   |         |         |          |   |          |         |          |   |          |          |         |
| C                                                                                                                                                                                                                     | -0.61452                                                                                                                                                                                                                                                                                                                                                                                                                                                                                                                                                                                                                                                                                                                                                                                                                                                                                                                                                                                                                                                                                                                                                                                                                                                                                                                                                                                                                                                                                                                                                                                                                                                                                                                                                                                                                                                                                                                                                                                                                                                                                                                                                                                                                                                                                                                                                                                                                                                                                                                                                                                                                                                                                                                                                                                     | 3.18459  | 2.09075  |          |          |   |          |         |          |   |          |          |          |   |          |          |          |   |          |         |          |   |          |          |          |   |          |          |          |   |          |          |          |   |          |         |          |   |          |          |         |   |                                                                                                                                                                                                                                                                                                                                                                                                                                                                                                                                                                                                                                                                                                                                                                     |          |         |         |          |          |         |         |          |         |          |          |          |          |         |         |          |          |          |         |          |         |         |          |          |          |          |          |          |          |          |          |          |          |          |         |          |          |          |          |          |          |          |   |          |          |          |   |          |          |          |   |          |          |          |   |          |          |         |   |          |          |         |   |          |          |         |   |          |          |         |   |          |          |          |   |          |          |         |   |          |         |         |   |          |         |          |   |          |         |         |   |          |         |         |                                                                                                                                                                                                                       |                                                                                                                                                                                                                                                                                                                                                                                                                                                                                                                                                                                                                                                                                                                                                                                                                                                                                                                                                                                                                                                                                                                                                                                                                                                                                                                                                                                                                                                                                                                                                                                                                                                                                                                                                                                                                                                                                                                                                                                                                                                                                                                                                                                                                                                                                                                                                                                                                                                                                                         |         |          |         |          |          |         |         |          |         |          |          |          |         |          |                                                                                                                                                                                                                        |                                                                                                                                                                                                                                                                                                                                                                                                                                                                                                                                                                                                                                                                                                                                                                                                                                                                                                                                                                                                                                                                                                                                                                                                                                                                                                                                                                                                                                                                                                                                                                                                                                                                                                                                                                                                                                                                                                                                                                                                                                                                                                                                                                                                                                                                                                                                                                                                                                                                                                                                                                                                                                                                                                                                                                                                |   |          |          |          |   |         |          |          |   |          |          |          |   |          |          |          |   |          |          |         |   |          |          |         |   |          |          |          |   |          |          |          |   |          |          |          |   |         |          |         |   |          |          |         |   |          |         |          |   |          |          |          |   |          |         |          |   |          |          |         |   |          |          |          |   |          |          |         |   |          |         |          |   |          |          |          |   |          |         |          |   |          |          |          |   |          |          |          |   |          |          |          |   |          |          |          |   |          |         |         |   |          |         |         |   |         |          |          |   |          |          |          |   |          |          |          |   |          |          |          |   |          |          |         |   |          |          |         |   |         |         |          |   |         |         |          |   |         |         |          |   |         |         |          |   |          |         |          |   |          |          |         |
| H                                                                                                                                                                                                                     | 0.44863                                                                                                                                                                                                                                                                                                                                                                                                                                                                                                                                                                                                                                                                                                                                                                                                                                                                                                                                                                                                                                                                                                                                                                                                                                                                                                                                                                                                                                                                                                                                                                                                                                                                                                                                                                                                                                                                                                                                                                                                                                                                                                                                                                                                                                                                                                                                                                                                                                                                                                                                                                                                                                                                                                                                                                                      | 3.33360  | 2.29524  |          |          |   |          |         |          |   |          |          |          |   |          |          |          |   |          |         |          |   |          |          |          |   |          |          |          |   |          |          |          |   |          |         |          |   |          |          |         |   |                                                                                                                                                                                                                                                                                                                                                                                                                                                                                                                                                                                                                                                                                                                                                                     |          |         |         |          |          |         |         |          |         |          |          |          |          |         |         |          |          |          |         |          |         |         |          |          |          |          |          |          |          |          |          |          |          |          |         |          |          |          |          |          |          |          |   |          |          |          |   |          |          |          |   |          |          |          |   |          |          |         |   |          |          |         |   |          |          |         |   |          |          |         |   |          |          |          |   |          |          |         |   |          |         |         |   |          |         |          |   |          |         |         |   |          |         |         |                                                                                                                                                                                                                       |                                                                                                                                                                                                                                                                                                                                                                                                                                                                                                                                                                                                                                                                                                                                                                                                                                                                                                                                                                                                                                                                                                                                                                                                                                                                                                                                                                                                                                                                                                                                                                                                                                                                                                                                                                                                                                                                                                                                                                                                                                                                                                                                                                                                                                                                                                                                                                                                                                                                                                         |         |          |         |          |          |         |         |          |         |          |          |          |         |          |                                                                                                                                                                                                                        |                                                                                                                                                                                                                                                                                                                                                                                                                                                                                                                                                                                                                                                                                                                                                                                                                                                                                                                                                                                                                                                                                                                                                                                                                                                                                                                                                                                                                                                                                                                                                                                                                                                                                                                                                                                                                                                                                                                                                                                                                                                                                                                                                                                                                                                                                                                                                                                                                                                                                                                                                                                                                                                                                                                                                                                                |   |          |          |          |   |         |          |          |   |          |          |          |   |          |          |          |   |          |          |         |   |          |          |         |   |          |          |          |   |          |          |          |   |          |          |          |   |         |          |         |   |          |          |         |   |          |         |          |   |          |          |          |   |          |         |          |   |          |          |         |   |          |          |          |   |          |          |         |   |          |         |          |   |          |          |          |   |          |         |          |   |          |          |          |   |          |          |          |   |          |          |          |   |          |          |          |   |          |         |         |   |          |         |         |   |         |          |          |   |          |          |          |   |          |          |          |   |          |          |          |   |          |          |         |   |          |          |         |   |         |         |          |   |         |         |          |   |         |         |          |   |         |         |          |   |          |         |          |   |          |          |         |
| H                                                                                                                                                                                                                     | -1.18261                                                                                                                                                                                                                                                                                                                                                                                                                                                                                                                                                                                                                                                                                                                                                                                                                                                                                                                                                                                                                                                                                                                                                                                                                                                                                                                                                                                                                                                                                                                                                                                                                                                                                                                                                                                                                                                                                                                                                                                                                                                                                                                                                                                                                                                                                                                                                                                                                                                                                                                                                                                                                                                                                                                                                                                     | 3.14389  | 3.03150  |          |          |   |          |         |          |   |          |          |          |   |          |          |          |   |          |         |          |   |          |          |          |   |          |          |          |   |          |          |          |   |          |         |          |   |          |          |         |   |                                                                                                                                                                                                                                                                                                                                                                                                                                                                                                                                                                                                                                                                                                                                                                     |          |         |         |          |          |         |         |          |         |          |          |          |          |         |         |          |          |          |         |          |         |         |          |          |          |          |          |          |          |          |          |          |          |          |         |          |          |          |          |          |          |          |   |          |          |          |   |          |          |          |   |          |          |          |   |          |          |         |   |          |          |         |   |          |          |         |   |          |          |         |   |          |          |          |   |          |          |         |   |          |         |         |   |          |         |          |   |          |         |         |   |          |         |         |                                                                                                                                                                                                                       |                                                                                                                                                                                                                                                                                                                                                                                                                                                                                                                                                                                                                                                                                                                                                                                                                                                                                                                                                                                                                                                                                                                                                                                                                                                                                                                                                                                                                                                                                                                                                                                                                                                                                                                                                                                                                                                                                                                                                                                                                                                                                                                                                                                                                                                                                                                                                                                                                                                                                                         |         |          |         |          |          |         |         |          |         |          |          |          |         |          |                                                                                                                                                                                                                        |                                                                                                                                                                                                                                                                                                                                                                                                                                                                                                                                                                                                                                                                                                                                                                                                                                                                                                                                                                                                                                                                                                                                                                                                                                                                                                                                                                                                                                                                                                                                                                                                                                                                                                                                                                                                                                                                                                                                                                                                                                                                                                                                                                                                                                                                                                                                                                                                                                                                                                                                                                                                                                                                                                                                                                                                |   |          |          |          |   |         |          |          |   |          |          |          |   |          |          |          |   |          |          |         |   |          |          |         |   |          |          |          |   |          |          |          |   |          |          |          |   |         |          |         |   |          |          |         |   |          |         |          |   |          |          |          |   |          |         |          |   |          |          |         |   |          |          |          |   |          |          |         |   |          |         |          |   |          |          |          |   |          |         |          |   |          |          |          |   |          |          |          |   |          |          |          |   |          |          |          |   |          |         |         |   |          |         |         |   |         |          |          |   |          |          |          |   |          |          |          |   |          |          |          |   |          |          |         |   |          |          |         |   |         |         |          |   |         |         |          |   |         |         |          |   |         |         |          |   |          |         |          |   |          |          |         |
| H                                                                                                                                                                                                                     | -0.96220                                                                                                                                                                                                                                                                                                                                                                                                                                                                                                                                                                                                                                                                                                                                                                                                                                                                                                                                                                                                                                                                                                                                                                                                                                                                                                                                                                                                                                                                                                                                                                                                                                                                                                                                                                                                                                                                                                                                                                                                                                                                                                                                                                                                                                                                                                                                                                                                                                                                                                                                                                                                                                                                                                                                                                                     | 3.99395  | 1.45138  |          |          |   |          |         |          |   |          |          |          |   |          |          |          |   |          |         |          |   |          |          |          |   |          |          |          |   |          |          |          |   |          |         |          |   |          |          |         |   |                                                                                                                                                                                                                                                                                                                                                                                                                                                                                                                                                                                                                                                                                                                                                                     |          |         |         |          |          |         |         |          |         |          |          |          |          |         |         |          |          |          |         |          |         |         |          |          |          |          |          |          |          |          |          |          |          |          |         |          |          |          |          |          |          |          |   |          |          |          |   |          |          |          |   |          |          |          |   |          |          |         |   |          |          |         |   |          |          |         |   |          |          |         |   |          |          |          |   |          |          |         |   |          |         |         |   |          |         |          |   |          |         |         |   |          |         |         |                                                                                                                                                                                                                       |                                                                                                                                                                                                                                                                                                                                                                                                                                                                                                                                                                                                                                                                                                                                                                                                                                                                                                                                                                                                                                                                                                                                                                                                                                                                                                                                                                                                                                                                                                                                                                                                                                                                                                                                                                                                                                                                                                                                                                                                                                                                                                                                                                                                                                                                                                                                                                                                                                                                                                         |         |          |         |          |          |         |         |          |         |          |          |          |         |          |                                                                                                                                                                                                                        |                                                                                                                                                                                                                                                                                                                                                                                                                                                                                                                                                                                                                                                                                                                                                                                                                                                                                                                                                                                                                                                                                                                                                                                                                                                                                                                                                                                                                                                                                                                                                                                                                                                                                                                                                                                                                                                                                                                                                                                                                                                                                                                                                                                                                                                                                                                                                                                                                                                                                                                                                                                                                                                                                                                                                                                                |   |          |          |          |   |         |          |          |   |          |          |          |   |          |          |          |   |          |          |         |   |          |          |         |   |          |          |          |   |          |          |          |   |          |          |          |   |         |          |         |   |          |          |         |   |          |         |          |   |          |          |          |   |          |         |          |   |          |          |         |   |          |          |          |   |          |          |         |   |          |         |          |   |          |          |          |   |          |         |          |   |          |          |          |   |          |          |          |   |          |          |          |   |          |          |          |   |          |         |         |   |          |         |         |   |         |          |          |   |          |          |          |   |          |          |          |   |          |          |          |   |          |          |         |   |          |          |         |   |         |         |          |   |         |         |          |   |         |         |          |   |         |         |          |   |          |         |          |   |          |          |         |
| C                                                                                                                                                                                                                     | 0.60925                                                                                                                                                                                                                                                                                                                                                                                                                                                                                                                                                                                                                                                                                                                                                                                                                                                                                                                                                                                                                                                                                                                                                                                                                                                                                                                                                                                                                                                                                                                                                                                                                                                                                                                                                                                                                                                                                                                                                                                                                                                                                                                                                                                                                                                                                                                                                                                                                                                                                                                                                                                                                                                                                                                                                                                      | -3.18688 | -2.09033 |          |          |   |          |         |          |   |          |          |          |   |          |          |          |   |          |         |          |   |          |          |          |   |          |          |          |   |          |          |          |   |          |         |          |   |          |          |         |   |                                                                                                                                                                                                                                                                                                                                                                                                                                                                                                                                                                                                                                                                                                                                                                     |          |         |         |          |          |         |         |          |         |          |          |          |          |         |         |          |          |          |         |          |         |         |          |          |          |          |          |          |          |          |          |          |          |          |         |          |          |          |          |          |          |          |   |          |          |          |   |          |          |          |   |          |          |          |   |          |          |         |   |          |          |         |   |          |          |         |   |          |          |         |   |          |          |          |   |          |          |         |   |          |         |         |   |          |         |          |   |          |         |         |   |          |         |         |                                                                                                                                                                                                                       |                                                                                                                                                                                                                                                                                                                                                                                                                                                                                                                                                                                                                                                                                                                                                                                                                                                                                                                                                                                                                                                                                                                                                                                                                                                                                                                                                                                                                                                                                                                                                                                                                                                                                                                                                                                                                                                                                                                                                                                                                                                                                                                                                                                                                                                                                                                                                                                                                                                                                                         |         |          |         |          |          |         |         |          |         |          |          |          |         |          |                                                                                                                                                                                                                        |                                                                                                                                                                                                                                                                                                                                                                                                                                                                                                                                                                                                                                                                                                                                                                                                                                                                                                                                                                                                                                                                                                                                                                                                                                                                                                                                                                                                                                                                                                                                                                                                                                                                                                                                                                                                                                                                                                                                                                                                                                                                                                                                                                                                                                                                                                                                                                                                                                                                                                                                                                                                                                                                                                                                                                                                |   |          |          |          |   |         |          |          |   |          |          |          |   |          |          |          |   |          |          |         |   |          |          |         |   |          |          |          |   |          |          |          |   |          |          |          |   |         |          |         |   |          |          |         |   |          |         |          |   |          |          |          |   |          |         |          |   |          |          |         |   |          |          |          |   |          |          |         |   |          |         |          |   |          |          |          |   |          |         |          |   |          |          |          |   |          |          |          |   |          |          |          |   |          |          |          |   |          |         |         |   |          |         |         |   |         |          |          |   |          |          |          |   |          |          |          |   |          |          |          |   |          |          |         |   |          |          |         |   |         |         |          |   |         |         |          |   |         |         |          |   |         |         |          |   |          |         |          |   |          |          |         |
| H                                                                                                                                                                                                                     | 1.17704                                                                                                                                                                                                                                                                                                                                                                                                                                                                                                                                                                                                                                                                                                                                                                                                                                                                                                                                                                                                                                                                                                                                                                                                                                                                                                                                                                                                                                                                                                                                                                                                                                                                                                                                                                                                                                                                                                                                                                                                                                                                                                                                                                                                                                                                                                                                                                                                                                                                                                                                                                                                                                                                                                                                                                                      | -3.14950 | -3.03139 |          |          |   |          |         |          |   |          |          |          |   |          |          |          |   |          |         |          |   |          |          |          |   |          |          |          |   |          |          |          |   |          |         |          |   |          |          |         |   |                                                                                                                                                                                                                                                                                                                                                                                                                                                                                                                                                                                                                                                                                                                                                                     |          |         |         |          |          |         |         |          |         |          |          |          |          |         |         |          |          |          |         |          |         |         |          |          |          |          |          |          |          |          |          |          |          |          |         |          |          |          |          |          |          |          |   |          |          |          |   |          |          |          |   |          |          |          |   |          |          |         |   |          |          |         |   |          |          |         |   |          |          |         |   |          |          |          |   |          |          |         |   |          |         |         |   |          |         |          |   |          |         |         |   |          |         |         |                                                                                                                                                                                                                       |                                                                                                                                                                                                                                                                                                                                                                                                                                                                                                                                                                                                                                                                                                                                                                                                                                                                                                                                                                                                                                                                                                                                                                                                                                                                                                                                                                                                                                                                                                                                                                                                                                                                                                                                                                                                                                                                                                                                                                                                                                                                                                                                                                                                                                                                                                                                                                                                                                                                                                         |         |          |         |          |          |         |         |          |         |          |          |          |         |          |                                                                                                                                                                                                                        |                                                                                                                                                                                                                                                                                                                                                                                                                                                                                                                                                                                                                                                                                                                                                                                                                                                                                                                                                                                                                                                                                                                                                                                                                                                                                                                                                                                                                                                                                                                                                                                                                                                                                                                                                                                                                                                                                                                                                                                                                                                                                                                                                                                                                                                                                                                                                                                                                                                                                                                                                                                                                                                                                                                                                                                                |   |          |          |          |   |         |          |          |   |          |          |          |   |          |          |          |   |          |          |         |   |          |          |         |   |          |          |          |   |          |          |          |   |          |          |          |   |         |          |         |   |          |          |         |   |          |         |          |   |          |          |          |   |          |         |          |   |          |          |         |   |          |          |          |   |          |          |         |   |          |         |          |   |          |          |          |   |          |         |          |   |          |          |          |   |          |          |          |   |          |          |          |   |          |          |          |   |          |         |         |   |          |         |         |   |         |          |          |   |          |          |          |   |          |          |          |   |          |          |          |   |          |          |         |   |          |          |         |   |         |         |          |   |         |         |          |   |         |         |          |   |         |         |          |   |          |         |          |   |          |          |         |
| H                                                                                                                                                                                                                     | -0.45455                                                                                                                                                                                                                                                                                                                                                                                                                                                                                                                                                                                                                                                                                                                                                                                                                                                                                                                                                                                                                                                                                                                                                                                                                                                                                                                                                                                                                                                                                                                                                                                                                                                                                                                                                                                                                                                                                                                                                                                                                                                                                                                                                                                                                                                                                                                                                                                                                                                                                                                                                                                                                                                                                                                                                                                     | -3.33240 | -2.29398 |          |          |   |          |         |          |   |          |          |          |   |          |          |          |   |          |         |          |   |          |          |          |   |          |          |          |   |          |          |          |   |          |         |          |   |          |          |         |   |                                                                                                                                                                                                                                                                                                                                                                                                                                                                                                                                                                                                                                                                                                                                                                     |          |         |         |          |          |         |         |          |         |          |          |          |          |         |         |          |          |          |         |          |         |         |          |          |          |          |          |          |          |          |          |          |          |          |         |          |          |          |          |          |          |          |   |          |          |          |   |          |          |          |   |          |          |          |   |          |          |         |   |          |          |         |   |          |          |         |   |          |          |         |   |          |          |          |   |          |          |         |   |          |         |         |   |          |         |          |   |          |         |         |   |          |         |         |                                                                                                                                                                                                                       |                                                                                                                                                                                                                                                                                                                                                                                                                                                                                                                                                                                                                                                                                                                                                                                                                                                                                                                                                                                                                                                                                                                                                                                                                                                                                                                                                                                                                                                                                                                                                                                                                                                                                                                                                                                                                                                                                                                                                                                                                                                                                                                                                                                                                                                                                                                                                                                                                                                                                                         |         |          |         |          |          |         |         |          |         |          |          |          |         |          |                                                                                                                                                                                                                        |                                                                                                                                                                                                                                                                                                                                                                                                                                                                                                                                                                                                                                                                                                                                                                                                                                                                                                                                                                                                                                                                                                                                                                                                                                                                                                                                                                                                                                                                                                                                                                                                                                                                                                                                                                                                                                                                                                                                                                                                                                                                                                                                                                                                                                                                                                                                                                                                                                                                                                                                                                                                                                                                                                                                                                                                |   |          |          |          |   |         |          |          |   |          |          |          |   |          |          |          |   |          |          |         |   |          |          |         |   |          |          |          |   |          |          |          |   |          |          |          |   |         |          |         |   |          |          |         |   |          |         |          |   |          |          |          |   |          |         |          |   |          |          |         |   |          |          |          |   |          |          |         |   |          |         |          |   |          |          |          |   |          |         |          |   |          |          |          |   |          |          |          |   |          |          |          |   |          |          |          |   |          |         |         |   |          |         |         |   |         |          |          |   |          |          |          |   |          |          |          |   |          |          |          |   |          |          |         |   |          |          |         |   |         |         |          |   |         |         |          |   |         |         |          |   |         |         |          |   |          |         |          |   |          |          |         |
| H                                                                                                                                                                                                                     | 0.95426                                                                                                                                                                                                                                                                                                                                                                                                                                                                                                                                                                                                                                                                                                                                                                                                                                                                                                                                                                                                                                                                                                                                                                                                                                                                                                                                                                                                                                                                                                                                                                                                                                                                                                                                                                                                                                                                                                                                                                                                                                                                                                                                                                                                                                                                                                                                                                                                                                                                                                                                                                                                                                                                                                                                                                                      | -3.99673 | -1.45015 |          |          |   |          |         |          |   |          |          |          |   |          |          |          |   |          |         |          |   |          |          |          |   |          |          |          |   |          |          |          |   |          |         |          |   |          |          |         |   |                                                                                                                                                                                                                                                                                                                                                                                                                                                                                                                                                                                                                                                                                                                                                                     |          |         |         |          |          |         |         |          |         |          |          |          |          |         |         |          |          |          |         |          |         |         |          |          |          |          |          |          |          |          |          |          |          |          |         |          |          |          |          |          |          |          |   |          |          |          |   |          |          |          |   |          |          |          |   |          |          |         |   |          |          |         |   |          |          |         |   |          |          |         |   |          |          |          |   |          |          |         |   |          |         |         |   |          |         |          |   |          |         |         |   |          |         |         |                                                                                                                                                                                                                       |                                                                                                                                                                                                                                                                                                                                                                                                                                                                                                                                                                                                                                                                                                                                                                                                                                                                                                                                                                                                                                                                                                                                                                                                                                                                                                                                                                                                                                                                                                                                                                                                                                                                                                                                                                                                                                                                                                                                                                                                                                                                                                                                                                                                                                                                                                                                                                                                                                                                                                         |         |          |         |          |          |         |         |          |         |          |          |          |         |          |                                                                                                                                                                                                                        |                                                                                                                                                                                                                                                                                                                                                                                                                                                                                                                                                                                                                                                                                                                                                                                                                                                                                                                                                                                                                                                                                                                                                                                                                                                                                                                                                                                                                                                                                                                                                                                                                                                                                                                                                                                                                                                                                                                                                                                                                                                                                                                                                                                                                                                                                                                                                                                                                                                                                                                                                                                                                                                                                                                                                                                                |   |          |          |          |   |         |          |          |   |          |          |          |   |          |          |          |   |          |          |         |   |          |          |         |   |          |          |          |   |          |          |          |   |          |          |          |   |         |          |         |   |          |          |         |   |          |         |          |   |          |          |          |   |          |         |          |   |          |          |         |   |          |          |          |   |          |          |         |   |          |         |          |   |          |          |          |   |          |         |          |   |          |          |          |   |          |          |          |   |          |          |          |   |          |          |          |   |          |         |         |   |          |         |         |   |         |          |          |   |          |          |          |   |          |          |          |   |          |          |          |   |          |          |         |   |          |          |         |   |         |         |          |   |         |         |          |   |         |         |          |   |         |         |          |   |          |         |          |   |          |          |         |
|  <p><b>2h</b><br/>                     -1029.637239<br/>                     -1029.459687<br/>                     -1030.354784</p> | <table border="1"> <tbody> <tr><td>H</td><td>0.30704</td><td>0.54202</td><td>-4.58149</td></tr> <tr><td>C</td><td>0.23196</td><td>0.45627</td><td>-3.50541</td></tr> <tr><td>C</td><td>0.03554</td><td>0.22191</td><td>-0.72567</td></tr> <tr><td>C</td><td>-0.53612</td><td>-0.56662</td><td>-2.95372</td></tr> <tr><td>C</td><td>0.89859</td><td>1.35244</td><td>-2.68901</td></tr> <tr><td>C</td><td>0.79029</td><td>1.24639</td><td>-1.30078</td></tr> <tr><td>C</td><td>-0.62545</td><td>-0.68490</td><td>-1.57040</td></tr> <tr><td>H</td><td>-1.04611</td><td>-1.26280</td><td>-3.60226</td></tr> <tr><td>H</td><td>1.51693</td><td>2.13451</td><td>-3.10614</td></tr> <tr><td>C</td><td>-0.02161</td><td>0.02893</td><td>0.75043</td></tr> <tr><td>C</td><td>-0.05288</td><td>-0.26200</td><td>3.52891</td></tr> <tr><td>C</td><td>1.03458</td><td>-0.62521</td><td>1.40713</td></tr> <tr><td>C</td><td>-1.07448</td><td>0.52608</td><td>1.50883</td></tr> <tr><td>C</td><td>-1.09849</td><td>0.39182</td><td>2.89656</td></tr> <tr><td>C</td><td>1.01549</td><td>-0.76946</td><td>2.79416</td></tr> <tr><td>H</td><td>-1.91861</td><td>0.80843</td><td>3.46493</td></tr> <tr><td>H</td><td>1.82664</td><td>-1.26750</td><td>3.30337</td></tr> <tr><td>H</td><td>-0.05732</td><td>-0.37555</td><td>4.60507</td></tr> <tr><td>O</td><td>-1.35263</td><td>-1.66397</td><td>-0.94436</td></tr> <tr><td>O</td><td>2.03212</td><td>-1.07981</td><td>0.61026</td></tr> <tr><td>C</td><td>-1.88985</td><td>-2.70805</td><td>-1.74339</td></tr> <tr><td>H</td><td>-1.10062</td><td>-3.20817</td><td>-2.31175</td></tr> <tr><td>H</td><td>-2.64449</td><td>-2.32782</td><td>-2.43952</td></tr> <tr><td>H</td><td>-2.34915</td><td>-3.41141</td><td>-1.05187</td></tr> <tr><td>C</td><td>3.20143</td><td>-1.59896</td><td>1.22417</td></tr> <tr><td>H</td><td>3.65231</td><td>-0.85758</td><td>1.89034</td></tr> <tr><td>H</td><td>3.88794</td><td>-1.82925</td><td>0.41296</td></tr> <tr><td>H</td><td>2.97861</td><td>-2.50830</td><td>1.79160</td></tr> <tr><td>C</td><td>1.57293</td><td>2.24599</td><td>-0.48216</td></tr> <tr><td>N</td><td>0.87276</td><td>2.94986</td><td>0.43605</td></tr> <tr><td>H</td><td>-0.12805</td><td>2.86940</td><td>0.56376</td></tr> <tr><td>H</td><td>1.37765</td><td>3.63252</td><td>0.97615</td></tr> <tr><td>C</td><td>-2.14785</td><td>1.32426</td><td>0.82318</td></tr> <tr><td>N</td><td>-3.10739</td><td>0.60017</td><td>0.20432</td></tr> <tr><td>H</td><td>-3.76856</td><td>1.09424</td><td>-0.37379</td></tr> <tr><td>H</td><td>-2.94250</td><td>-0.37889</td><td>0.03055</td></tr> <tr><td>O</td><td>-2.13643</td><td>2.54818</td><td>0.84443</td></tr> <tr><td>O</td><td>2.76577</td><td>2.41286</td><td>-0.68544</td></tr> </tbody> </table> | H        | 0.30704  | 0.54202  | -4.58149 | C | 0.23196  | 0.45627 | -3.50541 | C | 0.03554  | 0.22191  | -0.72567 | C | -0.53612 | -0.56662 | -2.95372 | C | 0.89859  | 1.35244 | -2.68901 | C | 0.79029  | 1.24639  | -1.30078 | C | -0.62545 | -0.68490 | -1.57040 | H | -1.04611 | -1.26280 | -3.60226 | H | 1.51693  | 2.13451 | -3.10614 | C | -0.02161 | 0.02893  | 0.75043 | C | -0.05288                                                                                                                                                                                                                                                                                                                                                                                                                                                                                                                                                                                                                                                                                                                                                            | -0.26200 | 3.52891 | C       | 1.03458  | -0.62521 | 1.40713 | C       | -1.07448 | 0.52608 | 1.50883  | C        | -1.09849 | 0.39182  | 2.89656 | C       | 1.01549  | -0.76946 | 2.79416  | H       | -1.91861 | 0.80843 | 3.46493 | H        | 1.82664  | -1.26750 | 3.30337  | H        | -0.05732 | -0.37555 | 4.60507  | O        | -1.35263 | -1.66397 | -0.94436 | O       | 2.03212  | -1.07981 | 0.61026  | C        | -1.88985 | -2.70805 | -1.74339 | H | -1.10062 | -3.20817 | -2.31175 | H | -2.64449 | -2.32782 | -2.43952 | H | -2.34915 | -3.41141 | -1.05187 | C | 3.20143  | -1.59896 | 1.22417 | H | 3.65231  | -0.85758 | 1.89034 | H | 3.88794  | -1.82925 | 0.41296 | H | 2.97861  | -2.50830 | 1.79160 | C | 1.57293  | 2.24599  | -0.48216 | N | 0.87276  | 2.94986  | 0.43605 | H | -0.12805 | 2.86940 | 0.56376 | H | 1.37765  | 3.63252 | 0.97615  | C | -2.14785 | 1.32426 | 0.82318 | N | -3.10739 | 0.60017 | 0.20432 | H                                                                                                                                                                                                                     | -3.76856                                                                                                                                                                                                                                                                                                                                                                                                                                                                                                                                                                                                                                                                                                                                                                                                                                                                                                                                                                                                                                                                                                                                                                                                                                                                                                                                                                                                                                                                                                                                                                                                                                                                                                                                                                                                                                                                                                                                                                                                                                                                                                                                                                                                                                                                                                                                                                                                                                                                                                | 1.09424 | -0.37379 | H       | -2.94250 | -0.37889 | 0.03055 | O       | -2.13643 | 2.54818 | 0.84443  | O        | 2.76577  | 2.41286 | -0.68544 |  <p><b>2h</b><br/>                     -1029.588990<br/>                     -1029.410860<br/>                     -1030.354784</p> | <table border="1"> <tbody> <tr><td>H</td><td>0.47676</td><td>-4.59760</td><td>-0.57153</td></tr> <tr><td>C</td><td>0.26740</td><td>-3.54645</td><td>-0.42518</td></tr> <tr><td>C</td><td>-0.06626</td><td>-0.73490</td><td>-0.06262</td></tr> <tr><td>C</td><td>-0.04973</td><td>-2.73942</td><td>-1.50435</td></tr> <tr><td>C</td><td>0.19652</td><td>-3.00670</td><td>0.84900</td></tr> <tr><td>C</td><td>-0.03102</td><td>-1.64635</td><td>1.03756</td></tr> <tr><td>C</td><td>-0.29216</td><td>-1.37714</td><td>-1.31744</td></tr> <tr><td>H</td><td>-0.14572</td><td>-3.16705</td><td>-2.49029</td></tr> <tr><td>H</td><td>0.26580</td><td>-3.63333</td><td>1.72681</td></tr> <tr><td>C</td><td>0.04721</td><td>0.75412</td><td>0.06353</td></tr> <tr><td>C</td><td>-0.28678</td><td>3.56552</td><td>0.42689</td></tr> <tr><td>C</td><td>0.27363</td><td>1.39612</td><td>1.31838</td></tr> <tr><td>C</td><td>0.01133</td><td>1.66581</td><td>-1.03644</td></tr> <tr><td>C</td><td>-0.21638</td><td>3.02607</td><td>-0.84745</td></tr> <tr><td>C</td><td>0.03105</td><td>2.75831</td><td>1.50573</td></tr> <tr><td>H</td><td>-0.28617</td><td>3.65290</td><td>-1.72508</td></tr> <tr><td>H</td><td>0.12741</td><td>3.18573</td><td>2.49172</td></tr> <tr><td>H</td><td>-0.49629</td><td>4.61659</td><td>0.57358</td></tr> <tr><td>O</td><td>-0.82459</td><td>-0.62520</td><td>-2.30569</td></tr> <tr><td>O</td><td>0.80662</td><td>0.64402</td><td>2.30622</td></tr> <tr><td>C</td><td>-0.88275</td><td>-1.11959</td><td>-3.63595</td></tr> <tr><td>H</td><td>-1.59521</td><td>-1.94522</td><td>-3.71108</td></tr> <tr><td>H</td><td>0.10348</td><td>-1.45777</td><td>-3.96597</td></tr> <tr><td>H</td><td>-1.20217</td><td>-0.27517</td><td>-4.24067</td></tr> <tr><td>C</td><td>0.86532</td><td>1.13812</td><td>3.63656</td></tr> <tr><td>H</td><td>1.57766</td><td>1.96387</td><td>3.71154</td></tr> <tr><td>H</td><td>1.18515</td><td>0.29364</td><td>4.24096</td></tr> <tr><td>H</td><td>-0.12083</td><td>1.47602</td><td>3.96710</td></tr> <tr><td>C</td><td>-0.51185</td><td>-1.35288</td><td>2.44094</td></tr> <tr><td>N</td><td>-1.69398</td><td>-0.66989</td><td>2.47766</td></tr> <tr><td>H</td><td>-2.05732</td><td>-0.20973</td><td>1.66199</td></tr> <tr><td>H</td><td>-2.08737</td><td>-0.45644</td><td>3.37804</td></tr> <tr><td>C</td><td>0.49183</td><td>1.37286</td><td>-2.44004</td></tr> <tr><td>N</td><td>1.67445</td><td>0.69072</td><td>-2.47719</td></tr> <tr><td>H</td><td>2.06758</td><td>0.47746</td><td>-3.37773</td></tr> <tr><td>H</td><td>2.03810</td><td>0.23039</td><td>-1.66173</td></tr> <tr><td>O</td><td>-0.00523</td><td>1.85417</td><td>-3.44234</td></tr> <tr><td>O</td><td>-0.01536</td><td>-1.83430</td><td>3.44347</td></tr> </tbody> </table> | H | 0.47676  | -4.59760 | -0.57153 | C | 0.26740 | -3.54645 | -0.42518 | C | -0.06626 | -0.73490 | -0.06262 | C | -0.04973 | -2.73942 | -1.50435 | C | 0.19652  | -3.00670 | 0.84900 | C | -0.03102 | -1.64635 | 1.03756 | C | -0.29216 | -1.37714 | -1.31744 | H | -0.14572 | -3.16705 | -2.49029 | H | 0.26580  | -3.63333 | 1.72681  | C | 0.04721 | 0.75412  | 0.06353 | C | -0.28678 | 3.56552  | 0.42689 | C | 0.27363  | 1.39612 | 1.31838  | C | 0.01133  | 1.66581  | -1.03644 | C | -0.21638 | 3.02607 | -0.84745 | C | 0.03105  | 2.75831  | 1.50573 | H | -0.28617 | 3.65290  | -1.72508 | H | 0.12741  | 3.18573  | 2.49172 | H | -0.49629 | 4.61659 | 0.57358  | O | -0.82459 | -0.62520 | -2.30569 | O | 0.80662  | 0.64402 | 2.30622  | C | -0.88275 | -1.11959 | -3.63595 | H | -1.59521 | -1.94522 | -3.71108 | H | 0.10348  | -1.45777 | -3.96597 | H | -1.20217 | -0.27517 | -4.24067 | C | 0.86532  | 1.13812 | 3.63656 | H | 1.57766  | 1.96387 | 3.71154 | H | 1.18515 | 0.29364  | 4.24096  | H | -0.12083 | 1.47602  | 3.96710  | C | -0.51185 | -1.35288 | 2.44094  | N | -1.69398 | -0.66989 | 2.47766  | H | -2.05732 | -0.20973 | 1.66199 | H | -2.08737 | -0.45644 | 3.37804 | C | 0.49183 | 1.37286 | -2.44004 | N | 1.67445 | 0.69072 | -2.47719 | H | 2.06758 | 0.47746 | -3.37773 | H | 2.03810 | 0.23039 | -1.66173 | O | -0.00523 | 1.85417 | -3.44234 | O | -0.01536 | -1.83430 | 3.44347 |
| H                                                                                                                                                                                                                     | 0.30704                                                                                                                                                                                                                                                                                                                                                                                                                                                                                                                                                                                                                                                                                                                                                                                                                                                                                                                                                                                                                                                                                                                                                                                                                                                                                                                                                                                                                                                                                                                                                                                                                                                                                                                                                                                                                                                                                                                                                                                                                                                                                                                                                                                                                                                                                                                                                                                                                                                                                                                                                                                                                                                                                                                                                                                      | 0.54202  | -4.58149 |          |          |   |          |         |          |   |          |          |          |   |          |          |          |   |          |         |          |   |          |          |          |   |          |          |          |   |          |          |          |   |          |         |          |   |          |          |         |   |                                                                                                                                                                                                                                                                                                                                                                                                                                                                                                                                                                                                                                                                                                                                                                     |          |         |         |          |          |         |         |          |         |          |          |          |          |         |         |          |          |          |         |          |         |         |          |          |          |          |          |          |          |          |          |          |          |          |         |          |          |          |          |          |          |          |   |          |          |          |   |          |          |          |   |          |          |          |   |          |          |         |   |          |          |         |   |          |          |         |   |          |          |         |   |          |          |          |   |          |          |         |   |          |         |         |   |          |         |          |   |          |         |         |   |          |         |         |                                                                                                                                                                                                                       |                                                                                                                                                                                                                                                                                                                                                                                                                                                                                                                                                                                                                                                                                                                                                                                                                                                                                                                                                                                                                                                                                                                                                                                                                                                                                                                                                                                                                                                                                                                                                                                                                                                                                                                                                                                                                                                                                                                                                                                                                                                                                                                                                                                                                                                                                                                                                                                                                                                                                                         |         |          |         |          |          |         |         |          |         |          |          |          |         |          |                                                                                                                                                                                                                        |                                                                                                                                                                                                                                                                                                                                                                                                                                                                                                                                                                                                                                                                                                                                                                                                                                                                                                                                                                                                                                                                                                                                                                                                                                                                                                                                                                                                                                                                                                                                                                                                                                                                                                                                                                                                                                                                                                                                                                                                                                                                                                                                                                                                                                                                                                                                                                                                                                                                                                                                                                                                                                                                                                                                                                                                |   |          |          |          |   |         |          |          |   |          |          |          |   |          |          |          |   |          |          |         |   |          |          |         |   |          |          |          |   |          |          |          |   |          |          |          |   |         |          |         |   |          |          |         |   |          |         |          |   |          |          |          |   |          |         |          |   |          |          |         |   |          |          |          |   |          |          |         |   |          |         |          |   |          |          |          |   |          |         |          |   |          |          |          |   |          |          |          |   |          |          |          |   |          |          |          |   |          |         |         |   |          |         |         |   |         |          |          |   |          |          |          |   |          |          |          |   |          |          |          |   |          |          |         |   |          |          |         |   |         |         |          |   |         |         |          |   |         |         |          |   |         |         |          |   |          |         |          |   |          |          |         |
| C                                                                                                                                                                                                                     | 0.23196                                                                                                                                                                                                                                                                                                                                                                                                                                                                                                                                                                                                                                                                                                                                                                                                                                                                                                                                                                                                                                                                                                                                                                                                                                                                                                                                                                                                                                                                                                                                                                                                                                                                                                                                                                                                                                                                                                                                                                                                                                                                                                                                                                                                                                                                                                                                                                                                                                                                                                                                                                                                                                                                                                                                                                                      | 0.45627  | -3.50541 |          |          |   |          |         |          |   |          |          |          |   |          |          |          |   |          |         |          |   |          |          |          |   |          |          |          |   |          |          |          |   |          |         |          |   |          |          |         |   |                                                                                                                                                                                                                                                                                                                                                                                                                                                                                                                                                                                                                                                                                                                                                                     |          |         |         |          |          |         |         |          |         |          |          |          |          |         |         |          |          |          |         |          |         |         |          |          |          |          |          |          |          |          |          |          |          |          |         |          |          |          |          |          |          |          |   |          |          |          |   |          |          |          |   |          |          |          |   |          |          |         |   |          |          |         |   |          |          |         |   |          |          |         |   |          |          |          |   |          |          |         |   |          |         |         |   |          |         |          |   |          |         |         |   |          |         |         |                                                                                                                                                                                                                       |                                                                                                                                                                                                                                                                                                                                                                                                                                                                                                                                                                                                                                                                                                                                                                                                                                                                                                                                                                                                                                                                                                                                                                                                                                                                                                                                                                                                                                                                                                                                                                                                                                                                                                                                                                                                                                                                                                                                                                                                                                                                                                                                                                                                                                                                                                                                                                                                                                                                                                         |         |          |         |          |          |         |         |          |         |          |          |          |         |          |                                                                                                                                                                                                                        |                                                                                                                                                                                                                                                                                                                                                                                                                                                                                                                                                                                                                                                                                                                                                                                                                                                                                                                                                                                                                                                                                                                                                                                                                                                                                                                                                                                                                                                                                                                                                                                                                                                                                                                                                                                                                                                                                                                                                                                                                                                                                                                                                                                                                                                                                                                                                                                                                                                                                                                                                                                                                                                                                                                                                                                                |   |          |          |          |   |         |          |          |   |          |          |          |   |          |          |          |   |          |          |         |   |          |          |         |   |          |          |          |   |          |          |          |   |          |          |          |   |         |          |         |   |          |          |         |   |          |         |          |   |          |          |          |   |          |         |          |   |          |          |         |   |          |          |          |   |          |          |         |   |          |         |          |   |          |          |          |   |          |         |          |   |          |          |          |   |          |          |          |   |          |          |          |   |          |          |          |   |          |         |         |   |          |         |         |   |         |          |          |   |          |          |          |   |          |          |          |   |          |          |          |   |          |          |         |   |          |          |         |   |         |         |          |   |         |         |          |   |         |         |          |   |         |         |          |   |          |         |          |   |          |          |         |
| C                                                                                                                                                                                                                     | 0.03554                                                                                                                                                                                                                                                                                                                                                                                                                                                                                                                                                                                                                                                                                                                                                                                                                                                                                                                                                                                                                                                                                                                                                                                                                                                                                                                                                                                                                                                                                                                                                                                                                                                                                                                                                                                                                                                                                                                                                                                                                                                                                                                                                                                                                                                                                                                                                                                                                                                                                                                                                                                                                                                                                                                                                                                      | 0.22191  | -0.72567 |          |          |   |          |         |          |   |          |          |          |   |          |          |          |   |          |         |          |   |          |          |          |   |          |          |          |   |          |          |          |   |          |         |          |   |          |          |         |   |                                                                                                                                                                                                                                                                                                                                                                                                                                                                                                                                                                                                                                                                                                                                                                     |          |         |         |          |          |         |         |          |         |          |          |          |          |         |         |          |          |          |         |          |         |         |          |          |          |          |          |          |          |          |          |          |          |          |         |          |          |          |          |          |          |          |   |          |          |          |   |          |          |          |   |          |          |          |   |          |          |         |   |          |          |         |   |          |          |         |   |          |          |         |   |          |          |          |   |          |          |         |   |          |         |         |   |          |         |          |   |          |         |         |   |          |         |         |                                                                                                                                                                                                                       |                                                                                                                                                                                                                                                                                                                                                                                                                                                                                                                                                                                                                                                                                                                                                                                                                                                                                                                                                                                                                                                                                                                                                                                                                                                                                                                                                                                                                                                                                                                                                                                                                                                                                                                                                                                                                                                                                                                                                                                                                                                                                                                                                                                                                                                                                                                                                                                                                                                                                                         |         |          |         |          |          |         |         |          |         |          |          |          |         |          |                                                                                                                                                                                                                        |                                                                                                                                                                                                                                                                                                                                                                                                                                                                                                                                                                                                                                                                                                                                                                                                                                                                                                                                                                                                                                                                                                                                                                                                                                                                                                                                                                                                                                                                                                                                                                                                                                                                                                                                                                                                                                                                                                                                                                                                                                                                                                                                                                                                                                                                                                                                                                                                                                                                                                                                                                                                                                                                                                                                                                                                |   |          |          |          |   |         |          |          |   |          |          |          |   |          |          |          |   |          |          |         |   |          |          |         |   |          |          |          |   |          |          |          |   |          |          |          |   |         |          |         |   |          |          |         |   |          |         |          |   |          |          |          |   |          |         |          |   |          |          |         |   |          |          |          |   |          |          |         |   |          |         |          |   |          |          |          |   |          |         |          |   |          |          |          |   |          |          |          |   |          |          |          |   |          |          |          |   |          |         |         |   |          |         |         |   |         |          |          |   |          |          |          |   |          |          |          |   |          |          |          |   |          |          |         |   |          |          |         |   |         |         |          |   |         |         |          |   |         |         |          |   |         |         |          |   |          |         |          |   |          |          |         |
| C                                                                                                                                                                                                                     | -0.53612                                                                                                                                                                                                                                                                                                                                                                                                                                                                                                                                                                                                                                                                                                                                                                                                                                                                                                                                                                                                                                                                                                                                                                                                                                                                                                                                                                                                                                                                                                                                                                                                                                                                                                                                                                                                                                                                                                                                                                                                                                                                                                                                                                                                                                                                                                                                                                                                                                                                                                                                                                                                                                                                                                                                                                                     | -0.56662 | -2.95372 |          |          |   |          |         |          |   |          |          |          |   |          |          |          |   |          |         |          |   |          |          |          |   |          |          |          |   |          |          |          |   |          |         |          |   |          |          |         |   |                                                                                                                                                                                                                                                                                                                                                                                                                                                                                                                                                                                                                                                                                                                                                                     |          |         |         |          |          |         |         |          |         |          |          |          |          |         |         |          |          |          |         |          |         |         |          |          |          |          |          |          |          |          |          |          |          |          |         |          |          |          |          |          |          |          |   |          |          |          |   |          |          |          |   |          |          |          |   |          |          |         |   |          |          |         |   |          |          |         |   |          |          |         |   |          |          |          |   |          |          |         |   |          |         |         |   |          |         |          |   |          |         |         |   |          |         |         |                                                                                                                                                                                                                       |                                                                                                                                                                                                                                                                                                                                                                                                                                                                                                                                                                                                                                                                                                                                                                                                                                                                                                                                                                                                                                                                                                                                                                                                                                                                                                                                                                                                                                                                                                                                                                                                                                                                                                                                                                                                                                                                                                                                                                                                                                                                                                                                                                                                                                                                                                                                                                                                                                                                                                         |         |          |         |          |          |         |         |          |         |          |          |          |         |          |                                                                                                                                                                                                                        |                                                                                                                                                                                                                                                                                                                                                                                                                                                                                                                                                                                                                                                                                                                                                                                                                                                                                                                                                                                                                                                                                                                                                                                                                                                                                                                                                                                                                                                                                                                                                                                                                                                                                                                                                                                                                                                                                                                                                                                                                                                                                                                                                                                                                                                                                                                                                                                                                                                                                                                                                                                                                                                                                                                                                                                                |   |          |          |          |   |         |          |          |   |          |          |          |   |          |          |          |   |          |          |         |   |          |          |         |   |          |          |          |   |          |          |          |   |          |          |          |   |         |          |         |   |          |          |         |   |          |         |          |   |          |          |          |   |          |         |          |   |          |          |         |   |          |          |          |   |          |          |         |   |          |         |          |   |          |          |          |   |          |         |          |   |          |          |          |   |          |          |          |   |          |          |          |   |          |          |          |   |          |         |         |   |          |         |         |   |         |          |          |   |          |          |          |   |          |          |          |   |          |          |          |   |          |          |         |   |          |          |         |   |         |         |          |   |         |         |          |   |         |         |          |   |         |         |          |   |          |         |          |   |          |          |         |
| C                                                                                                                                                                                                                     | 0.89859                                                                                                                                                                                                                                                                                                                                                                                                                                                                                                                                                                                                                                                                                                                                                                                                                                                                                                                                                                                                                                                                                                                                                                                                                                                                                                                                                                                                                                                                                                                                                                                                                                                                                                                                                                                                                                                                                                                                                                                                                                                                                                                                                                                                                                                                                                                                                                                                                                                                                                                                                                                                                                                                                                                                                                                      | 1.35244  | -2.68901 |          |          |   |          |         |          |   |          |          |          |   |          |          |          |   |          |         |          |   |          |          |          |   |          |          |          |   |          |          |          |   |          |         |          |   |          |          |         |   |                                                                                                                                                                                                                                                                                                                                                                                                                                                                                                                                                                                                                                                                                                                                                                     |          |         |         |          |          |         |         |          |         |          |          |          |          |         |         |          |          |          |         |          |         |         |          |          |          |          |          |          |          |          |          |          |          |          |         |          |          |          |          |          |          |          |   |          |          |          |   |          |          |          |   |          |          |          |   |          |          |         |   |          |          |         |   |          |          |         |   |          |          |         |   |          |          |          |   |          |          |         |   |          |         |         |   |          |         |          |   |          |         |         |   |          |         |         |                                                                                                                                                                                                                       |                                                                                                                                                                                                                                                                                                                                                                                                                                                                                                                                                                                                                                                                                                                                                                                                                                                                                                                                                                                                                                                                                                                                                                                                                                                                                                                                                                                                                                                                                                                                                                                                                                                                                                                                                                                                                                                                                                                                                                                                                                                                                                                                                                                                                                                                                                                                                                                                                                                                                                         |         |          |         |          |          |         |         |          |         |          |          |          |         |          |                                                                                                                                                                                                                        |                                                                                                                                                                                                                                                                                                                                                                                                                                                                                                                                                                                                                                                                                                                                                                                                                                                                                                                                                                                                                                                                                                                                                                                                                                                                                                                                                                                                                                                                                                                                                                                                                                                                                                                                                                                                                                                                                                                                                                                                                                                                                                                                                                                                                                                                                                                                                                                                                                                                                                                                                                                                                                                                                                                                                                                                |   |          |          |          |   |         |          |          |   |          |          |          |   |          |          |          |   |          |          |         |   |          |          |         |   |          |          |          |   |          |          |          |   |          |          |          |   |         |          |         |   |          |          |         |   |          |         |          |   |          |          |          |   |          |         |          |   |          |          |         |   |          |          |          |   |          |          |         |   |          |         |          |   |          |          |          |   |          |         |          |   |          |          |          |   |          |          |          |   |          |          |          |   |          |          |          |   |          |         |         |   |          |         |         |   |         |          |          |   |          |          |          |   |          |          |          |   |          |          |          |   |          |          |         |   |          |          |         |   |         |         |          |   |         |         |          |   |         |         |          |   |         |         |          |   |          |         |          |   |          |          |         |
| C                                                                                                                                                                                                                     | 0.79029                                                                                                                                                                                                                                                                                                                                                                                                                                                                                                                                                                                                                                                                                                                                                                                                                                                                                                                                                                                                                                                                                                                                                                                                                                                                                                                                                                                                                                                                                                                                                                                                                                                                                                                                                                                                                                                                                                                                                                                                                                                                                                                                                                                                                                                                                                                                                                                                                                                                                                                                                                                                                                                                                                                                                                                      | 1.24639  | -1.30078 |          |          |   |          |         |          |   |          |          |          |   |          |          |          |   |          |         |          |   |          |          |          |   |          |          |          |   |          |          |          |   |          |         |          |   |          |          |         |   |                                                                                                                                                                                                                                                                                                                                                                                                                                                                                                                                                                                                                                                                                                                                                                     |          |         |         |          |          |         |         |          |         |          |          |          |          |         |         |          |          |          |         |          |         |         |          |          |          |          |          |          |          |          |          |          |          |          |         |          |          |          |          |          |          |          |   |          |          |          |   |          |          |          |   |          |          |          |   |          |          |         |   |          |          |         |   |          |          |         |   |          |          |         |   |          |          |          |   |          |          |         |   |          |         |         |   |          |         |          |   |          |         |         |   |          |         |         |                                                                                                                                                                                                                       |                                                                                                                                                                                                                                                                                                                                                                                                                                                                                                                                                                                                                                                                                                                                                                                                                                                                                                                                                                                                                                                                                                                                                                                                                                                                                                                                                                                                                                                                                                                                                                                                                                                                                                                                                                                                                                                                                                                                                                                                                                                                                                                                                                                                                                                                                                                                                                                                                                                                                                         |         |          |         |          |          |         |         |          |         |          |          |          |         |          |                                                                                                                                                                                                                        |                                                                                                                                                                                                                                                                                                                                                                                                                                                                                                                                                                                                                                                                                                                                                                                                                                                                                                                                                                                                                                                                                                                                                                                                                                                                                                                                                                                                                                                                                                                                                                                                                                                                                                                                                                                                                                                                                                                                                                                                                                                                                                                                                                                                                                                                                                                                                                                                                                                                                                                                                                                                                                                                                                                                                                                                |   |          |          |          |   |         |          |          |   |          |          |          |   |          |          |          |   |          |          |         |   |          |          |         |   |          |          |          |   |          |          |          |   |          |          |          |   |         |          |         |   |          |          |         |   |          |         |          |   |          |          |          |   |          |         |          |   |          |          |         |   |          |          |          |   |          |          |         |   |          |         |          |   |          |          |          |   |          |         |          |   |          |          |          |   |          |          |          |   |          |          |          |   |          |          |          |   |          |         |         |   |          |         |         |   |         |          |          |   |          |          |          |   |          |          |          |   |          |          |          |   |          |          |         |   |          |          |         |   |         |         |          |   |         |         |          |   |         |         |          |   |         |         |          |   |          |         |          |   |          |          |         |
| C                                                                                                                                                                                                                     | -0.62545                                                                                                                                                                                                                                                                                                                                                                                                                                                                                                                                                                                                                                                                                                                                                                                                                                                                                                                                                                                                                                                                                                                                                                                                                                                                                                                                                                                                                                                                                                                                                                                                                                                                                                                                                                                                                                                                                                                                                                                                                                                                                                                                                                                                                                                                                                                                                                                                                                                                                                                                                                                                                                                                                                                                                                                     | -0.68490 | -1.57040 |          |          |   |          |         |          |   |          |          |          |   |          |          |          |   |          |         |          |   |          |          |          |   |          |          |          |   |          |          |          |   |          |         |          |   |          |          |         |   |                                                                                                                                                                                                                                                                                                                                                                                                                                                                                                                                                                                                                                                                                                                                                                     |          |         |         |          |          |         |         |          |         |          |          |          |          |         |         |          |          |          |         |          |         |         |          |          |          |          |          |          |          |          |          |          |          |          |         |          |          |          |          |          |          |          |   |          |          |          |   |          |          |          |   |          |          |          |   |          |          |         |   |          |          |         |   |          |          |         |   |          |          |         |   |          |          |          |   |          |          |         |   |          |         |         |   |          |         |          |   |          |         |         |   |          |         |         |                                                                                                                                                                                                                       |                                                                                                                                                                                                                                                                                                                                                                                                                                                                                                                                                                                                                                                                                                                                                                                                                                                                                                                                                                                                                                                                                                                                                                                                                                                                                                                                                                                                                                                                                                                                                                                                                                                                                                                                                                                                                                                                                                                                                                                                                                                                                                                                                                                                                                                                                                                                                                                                                                                                                                         |         |          |         |          |          |         |         |          |         |          |          |          |         |          |                                                                                                                                                                                                                        |                                                                                                                                                                                                                                                                                                                                                                                                                                                                                                                                                                                                                                                                                                                                                                                                                                                                                                                                                                                                                                                                                                                                                                                                                                                                                                                                                                                                                                                                                                                                                                                                                                                                                                                                                                                                                                                                                                                                                                                                                                                                                                                                                                                                                                                                                                                                                                                                                                                                                                                                                                                                                                                                                                                                                                                                |   |          |          |          |   |         |          |          |   |          |          |          |   |          |          |          |   |          |          |         |   |          |          |         |   |          |          |          |   |          |          |          |   |          |          |          |   |         |          |         |   |          |          |         |   |          |         |          |   |          |          |          |   |          |         |          |   |          |          |         |   |          |          |          |   |          |          |         |   |          |         |          |   |          |          |          |   |          |         |          |   |          |          |          |   |          |          |          |   |          |          |          |   |          |          |          |   |          |         |         |   |          |         |         |   |         |          |          |   |          |          |          |   |          |          |          |   |          |          |          |   |          |          |         |   |          |          |         |   |         |         |          |   |         |         |          |   |         |         |          |   |         |         |          |   |          |         |          |   |          |          |         |
| H                                                                                                                                                                                                                     | -1.04611                                                                                                                                                                                                                                                                                                                                                                                                                                                                                                                                                                                                                                                                                                                                                                                                                                                                                                                                                                                                                                                                                                                                                                                                                                                                                                                                                                                                                                                                                                                                                                                                                                                                                                                                                                                                                                                                                                                                                                                                                                                                                                                                                                                                                                                                                                                                                                                                                                                                                                                                                                                                                                                                                                                                                                                     | -1.26280 | -3.60226 |          |          |   |          |         |          |   |          |          |          |   |          |          |          |   |          |         |          |   |          |          |          |   |          |          |          |   |          |          |          |   |          |         |          |   |          |          |         |   |                                                                                                                                                                                                                                                                                                                                                                                                                                                                                                                                                                                                                                                                                                                                                                     |          |         |         |          |          |         |         |          |         |          |          |          |          |         |         |          |          |          |         |          |         |         |          |          |          |          |          |          |          |          |          |          |          |          |         |          |          |          |          |          |          |          |   |          |          |          |   |          |          |          |   |          |          |          |   |          |          |         |   |          |          |         |   |          |          |         |   |          |          |         |   |          |          |          |   |          |          |         |   |          |         |         |   |          |         |          |   |          |         |         |   |          |         |         |                                                                                                                                                                                                                       |                                                                                                                                                                                                                                                                                                                                                                                                                                                                                                                                                                                                                                                                                                                                                                                                                                                                                                                                                                                                                                                                                                                                                                                                                                                                                                                                                                                                                                                                                                                                                                                                                                                                                                                                                                                                                                                                                                                                                                                                                                                                                                                                                                                                                                                                                                                                                                                                                                                                                                         |         |          |         |          |          |         |         |          |         |          |          |          |         |          |                                                                                                                                                                                                                        |                                                                                                                                                                                                                                                                                                                                                                                                                                                                                                                                                                                                                                                                                                                                                                                                                                                                                                                                                                                                                                                                                                                                                                                                                                                                                                                                                                                                                                                                                                                                                                                                                                                                                                                                                                                                                                                                                                                                                                                                                                                                                                                                                                                                                                                                                                                                                                                                                                                                                                                                                                                                                                                                                                                                                                                                |   |          |          |          |   |         |          |          |   |          |          |          |   |          |          |          |   |          |          |         |   |          |          |         |   |          |          |          |   |          |          |          |   |          |          |          |   |         |          |         |   |          |          |         |   |          |         |          |   |          |          |          |   |          |         |          |   |          |          |         |   |          |          |          |   |          |          |         |   |          |         |          |   |          |          |          |   |          |         |          |   |          |          |          |   |          |          |          |   |          |          |          |   |          |          |          |   |          |         |         |   |          |         |         |   |         |          |          |   |          |          |          |   |          |          |          |   |          |          |          |   |          |          |         |   |          |          |         |   |         |         |          |   |         |         |          |   |         |         |          |   |         |         |          |   |          |         |          |   |          |          |         |
| H                                                                                                                                                                                                                     | 1.51693                                                                                                                                                                                                                                                                                                                                                                                                                                                                                                                                                                                                                                                                                                                                                                                                                                                                                                                                                                                                                                                                                                                                                                                                                                                                                                                                                                                                                                                                                                                                                                                                                                                                                                                                                                                                                                                                                                                                                                                                                                                                                                                                                                                                                                                                                                                                                                                                                                                                                                                                                                                                                                                                                                                                                                                      | 2.13451  | -3.10614 |          |          |   |          |         |          |   |          |          |          |   |          |          |          |   |          |         |          |   |          |          |          |   |          |          |          |   |          |          |          |   |          |         |          |   |          |          |         |   |                                                                                                                                                                                                                                                                                                                                                                                                                                                                                                                                                                                                                                                                                                                                                                     |          |         |         |          |          |         |         |          |         |          |          |          |          |         |         |          |          |          |         |          |         |         |          |          |          |          |          |          |          |          |          |          |          |          |         |          |          |          |          |          |          |          |   |          |          |          |   |          |          |          |   |          |          |          |   |          |          |         |   |          |          |         |   |          |          |         |   |          |          |         |   |          |          |          |   |          |          |         |   |          |         |         |   |          |         |          |   |          |         |         |   |          |         |         |                                                                                                                                                                                                                       |                                                                                                                                                                                                                                                                                                                                                                                                                                                                                                                                                                                                                                                                                                                                                                                                                                                                                                                                                                                                                                                                                                                                                                                                                                                                                                                                                                                                                                                                                                                                                                                                                                                                                                                                                                                                                                                                                                                                                                                                                                                                                                                                                                                                                                                                                                                                                                                                                                                                                                         |         |          |         |          |          |         |         |          |         |          |          |          |         |          |                                                                                                                                                                                                                        |                                                                                                                                                                                                                                                                                                                                                                                                                                                                                                                                                                                                                                                                                                                                                                                                                                                                                                                                                                                                                                                                                                                                                                                                                                                                                                                                                                                                                                                                                                                                                                                                                                                                                                                                                                                                                                                                                                                                                                                                                                                                                                                                                                                                                                                                                                                                                                                                                                                                                                                                                                                                                                                                                                                                                                                                |   |          |          |          |   |         |          |          |   |          |          |          |   |          |          |          |   |          |          |         |   |          |          |         |   |          |          |          |   |          |          |          |   |          |          |          |   |         |          |         |   |          |          |         |   |          |         |          |   |          |          |          |   |          |         |          |   |          |          |         |   |          |          |          |   |          |          |         |   |          |         |          |   |          |          |          |   |          |         |          |   |          |          |          |   |          |          |          |   |          |          |          |   |          |          |          |   |          |         |         |   |          |         |         |   |         |          |          |   |          |          |          |   |          |          |          |   |          |          |          |   |          |          |         |   |          |          |         |   |         |         |          |   |         |         |          |   |         |         |          |   |         |         |          |   |          |         |          |   |          |          |         |
| C                                                                                                                                                                                                                     | -0.02161                                                                                                                                                                                                                                                                                                                                                                                                                                                                                                                                                                                                                                                                                                                                                                                                                                                                                                                                                                                                                                                                                                                                                                                                                                                                                                                                                                                                                                                                                                                                                                                                                                                                                                                                                                                                                                                                                                                                                                                                                                                                                                                                                                                                                                                                                                                                                                                                                                                                                                                                                                                                                                                                                                                                                                                     | 0.02893  | 0.75043  |          |          |   |          |         |          |   |          |          |          |   |          |          |          |   |          |         |          |   |          |          |          |   |          |          |          |   |          |          |          |   |          |         |          |   |          |          |         |   |                                                                                                                                                                                                                                                                                                                                                                                                                                                                                                                                                                                                                                                                                                                                                                     |          |         |         |          |          |         |         |          |         |          |          |          |          |         |         |          |          |          |         |          |         |         |          |          |          |          |          |          |          |          |          |          |          |          |         |          |          |          |          |          |          |          |   |          |          |          |   |          |          |          |   |          |          |          |   |          |          |         |   |          |          |         |   |          |          |         |   |          |          |         |   |          |          |          |   |          |          |         |   |          |         |         |   |          |         |          |   |          |         |         |   |          |         |         |                                                                                                                                                                                                                       |                                                                                                                                                                                                                                                                                                                                                                                                                                                                                                                                                                                                                                                                                                                                                                                                                                                                                                                                                                                                                                                                                                                                                                                                                                                                                                                                                                                                                                                                                                                                                                                                                                                                                                                                                                                                                                                                                                                                                                                                                                                                                                                                                                                                                                                                                                                                                                                                                                                                                                         |         |          |         |          |          |         |         |          |         |          |          |          |         |          |                                                                                                                                                                                                                        |                                                                                                                                                                                                                                                                                                                                                                                                                                                                                                                                                                                                                                                                                                                                                                                                                                                                                                                                                                                                                                                                                                                                                                                                                                                                                                                                                                                                                                                                                                                                                                                                                                                                                                                                                                                                                                                                                                                                                                                                                                                                                                                                                                                                                                                                                                                                                                                                                                                                                                                                                                                                                                                                                                                                                                                                |   |          |          |          |   |         |          |          |   |          |          |          |   |          |          |          |   |          |          |         |   |          |          |         |   |          |          |          |   |          |          |          |   |          |          |          |   |         |          |         |   |          |          |         |   |          |         |          |   |          |          |          |   |          |         |          |   |          |          |         |   |          |          |          |   |          |          |         |   |          |         |          |   |          |          |          |   |          |         |          |   |          |          |          |   |          |          |          |   |          |          |          |   |          |          |          |   |          |         |         |   |          |         |         |   |         |          |          |   |          |          |          |   |          |          |          |   |          |          |          |   |          |          |         |   |          |          |         |   |         |         |          |   |         |         |          |   |         |         |          |   |         |         |          |   |          |         |          |   |          |          |         |
| C                                                                                                                                                                                                                     | -0.05288                                                                                                                                                                                                                                                                                                                                                                                                                                                                                                                                                                                                                                                                                                                                                                                                                                                                                                                                                                                                                                                                                                                                                                                                                                                                                                                                                                                                                                                                                                                                                                                                                                                                                                                                                                                                                                                                                                                                                                                                                                                                                                                                                                                                                                                                                                                                                                                                                                                                                                                                                                                                                                                                                                                                                                                     | -0.26200 | 3.52891  |          |          |   |          |         |          |   |          |          |          |   |          |          |          |   |          |         |          |   |          |          |          |   |          |          |          |   |          |          |          |   |          |         |          |   |          |          |         |   |                                                                                                                                                                                                                                                                                                                                                                                                                                                                                                                                                                                                                                                                                                                                                                     |          |         |         |          |          |         |         |          |         |          |          |          |          |         |         |          |          |          |         |          |         |         |          |          |          |          |          |          |          |          |          |          |          |          |         |          |          |          |          |          |          |          |   |          |          |          |   |          |          |          |   |          |          |          |   |          |          |         |   |          |          |         |   |          |          |         |   |          |          |         |   |          |          |          |   |          |          |         |   |          |         |         |   |          |         |          |   |          |         |         |   |          |         |         |                                                                                                                                                                                                                       |                                                                                                                                                                                                                                                                                                                                                                                                                                                                                                                                                                                                                                                                                                                                                                                                                                                                                                                                                                                                                                                                                                                                                                                                                                                                                                                                                                                                                                                                                                                                                                                                                                                                                                                                                                                                                                                                                                                                                                                                                                                                                                                                                                                                                                                                                                                                                                                                                                                                                                         |         |          |         |          |          |         |         |          |         |          |          |          |         |          |                                                                                                                                                                                                                        |                                                                                                                                                                                                                                                                                                                                                                                                                                                                                                                                                                                                                                                                                                                                                                                                                                                                                                                                                                                                                                                                                                                                                                                                                                                                                                                                                                                                                                                                                                                                                                                                                                                                                                                                                                                                                                                                                                                                                                                                                                                                                                                                                                                                                                                                                                                                                                                                                                                                                                                                                                                                                                                                                                                                                                                                |   |          |          |          |   |         |          |          |   |          |          |          |   |          |          |          |   |          |          |         |   |          |          |         |   |          |          |          |   |          |          |          |   |          |          |          |   |         |          |         |   |          |          |         |   |          |         |          |   |          |          |          |   |          |         |          |   |          |          |         |   |          |          |          |   |          |          |         |   |          |         |          |   |          |          |          |   |          |         |          |   |          |          |          |   |          |          |          |   |          |          |          |   |          |          |          |   |          |         |         |   |          |         |         |   |         |          |          |   |          |          |          |   |          |          |          |   |          |          |          |   |          |          |         |   |          |          |         |   |         |         |          |   |         |         |          |   |         |         |          |   |         |         |          |   |          |         |          |   |          |          |         |
| C                                                                                                                                                                                                                     | 1.03458                                                                                                                                                                                                                                                                                                                                                                                                                                                                                                                                                                                                                                                                                                                                                                                                                                                                                                                                                                                                                                                                                                                                                                                                                                                                                                                                                                                                                                                                                                                                                                                                                                                                                                                                                                                                                                                                                                                                                                                                                                                                                                                                                                                                                                                                                                                                                                                                                                                                                                                                                                                                                                                                                                                                                                                      | -0.62521 | 1.40713  |          |          |   |          |         |          |   |          |          |          |   |          |          |          |   |          |         |          |   |          |          |          |   |          |          |          |   |          |          |          |   |          |         |          |   |          |          |         |   |                                                                                                                                                                                                                                                                                                                                                                                                                                                                                                                                                                                                                                                                                                                                                                     |          |         |         |          |          |         |         |          |         |          |          |          |          |         |         |          |          |          |         |          |         |         |          |          |          |          |          |          |          |          |          |          |          |          |         |          |          |          |          |          |          |          |   |          |          |          |   |          |          |          |   |          |          |          |   |          |          |         |   |          |          |         |   |          |          |         |   |          |          |         |   |          |          |          |   |          |          |         |   |          |         |         |   |          |         |          |   |          |         |         |   |          |         |         |                                                                                                                                                                                                                       |                                                                                                                                                                                                                                                                                                                                                                                                                                                                                                                                                                                                                                                                                                                                                                                                                                                                                                                                                                                                                                                                                                                                                                                                                                                                                                                                                                                                                                                                                                                                                                                                                                                                                                                                                                                                                                                                                                                                                                                                                                                                                                                                                                                                                                                                                                                                                                                                                                                                                                         |         |          |         |          |          |         |         |          |         |          |          |          |         |          |                                                                                                                                                                                                                        |                                                                                                                                                                                                                                                                                                                                                                                                                                                                                                                                                                                                                                                                                                                                                                                                                                                                                                                                                                                                                                                                                                                                                                                                                                                                                                                                                                                                                                                                                                                                                                                                                                                                                                                                                                                                                                                                                                                                                                                                                                                                                                                                                                                                                                                                                                                                                                                                                                                                                                                                                                                                                                                                                                                                                                                                |   |          |          |          |   |         |          |          |   |          |          |          |   |          |          |          |   |          |          |         |   |          |          |         |   |          |          |          |   |          |          |          |   |          |          |          |   |         |          |         |   |          |          |         |   |          |         |          |   |          |          |          |   |          |         |          |   |          |          |         |   |          |          |          |   |          |          |         |   |          |         |          |   |          |          |          |   |          |         |          |   |          |          |          |   |          |          |          |   |          |          |          |   |          |          |          |   |          |         |         |   |          |         |         |   |         |          |          |   |          |          |          |   |          |          |          |   |          |          |          |   |          |          |         |   |          |          |         |   |         |         |          |   |         |         |          |   |         |         |          |   |         |         |          |   |          |         |          |   |          |          |         |
| C                                                                                                                                                                                                                     | -1.07448                                                                                                                                                                                                                                                                                                                                                                                                                                                                                                                                                                                                                                                                                                                                                                                                                                                                                                                                                                                                                                                                                                                                                                                                                                                                                                                                                                                                                                                                                                                                                                                                                                                                                                                                                                                                                                                                                                                                                                                                                                                                                                                                                                                                                                                                                                                                                                                                                                                                                                                                                                                                                                                                                                                                                                                     | 0.52608  | 1.50883  |          |          |   |          |         |          |   |          |          |          |   |          |          |          |   |          |         |          |   |          |          |          |   |          |          |          |   |          |          |          |   |          |         |          |   |          |          |         |   |                                                                                                                                                                                                                                                                                                                                                                                                                                                                                                                                                                                                                                                                                                                                                                     |          |         |         |          |          |         |         |          |         |          |          |          |          |         |         |          |          |          |         |          |         |         |          |          |          |          |          |          |          |          |          |          |          |          |         |          |          |          |          |          |          |          |   |          |          |          |   |          |          |          |   |          |          |          |   |          |          |         |   |          |          |         |   |          |          |         |   |          |          |         |   |          |          |          |   |          |          |         |   |          |         |         |   |          |         |          |   |          |         |         |   |          |         |         |                                                                                                                                                                                                                       |                                                                                                                                                                                                                                                                                                                                                                                                                                                                                                                                                                                                                                                                                                                                                                                                                                                                                                                                                                                                                                                                                                                                                                                                                                                                                                                                                                                                                                                                                                                                                                                                                                                                                                                                                                                                                                                                                                                                                                                                                                                                                                                                                                                                                                                                                                                                                                                                                                                                                                         |         |          |         |          |          |         |         |          |         |          |          |          |         |          |                                                                                                                                                                                                                        |                                                                                                                                                                                                                                                                                                                                                                                                                                                                                                                                                                                                                                                                                                                                                                                                                                                                                                                                                                                                                                                                                                                                                                                                                                                                                                                                                                                                                                                                                                                                                                                                                                                                                                                                                                                                                                                                                                                                                                                                                                                                                                                                                                                                                                                                                                                                                                                                                                                                                                                                                                                                                                                                                                                                                                                                |   |          |          |          |   |         |          |          |   |          |          |          |   |          |          |          |   |          |          |         |   |          |          |         |   |          |          |          |   |          |          |          |   |          |          |          |   |         |          |         |   |          |          |         |   |          |         |          |   |          |          |          |   |          |         |          |   |          |          |         |   |          |          |          |   |          |          |         |   |          |         |          |   |          |          |          |   |          |         |          |   |          |          |          |   |          |          |          |   |          |          |          |   |          |          |          |   |          |         |         |   |          |         |         |   |         |          |          |   |          |          |          |   |          |          |          |   |          |          |          |   |          |          |         |   |          |          |         |   |         |         |          |   |         |         |          |   |         |         |          |   |         |         |          |   |          |         |          |   |          |          |         |
| C                                                                                                                                                                                                                     | -1.09849                                                                                                                                                                                                                                                                                                                                                                                                                                                                                                                                                                                                                                                                                                                                                                                                                                                                                                                                                                                                                                                                                                                                                                                                                                                                                                                                                                                                                                                                                                                                                                                                                                                                                                                                                                                                                                                                                                                                                                                                                                                                                                                                                                                                                                                                                                                                                                                                                                                                                                                                                                                                                                                                                                                                                                                     | 0.39182  | 2.89656  |          |          |   |          |         |          |   |          |          |          |   |          |          |          |   |          |         |          |   |          |          |          |   |          |          |          |   |          |          |          |   |          |         |          |   |          |          |         |   |                                                                                                                                                                                                                                                                                                                                                                                                                                                                                                                                                                                                                                                                                                                                                                     |          |         |         |          |          |         |         |          |         |          |          |          |          |         |         |          |          |          |         |          |         |         |          |          |          |          |          |          |          |          |          |          |          |          |         |          |          |          |          |          |          |          |   |          |          |          |   |          |          |          |   |          |          |          |   |          |          |         |   |          |          |         |   |          |          |         |   |          |          |         |   |          |          |          |   |          |          |         |   |          |         |         |   |          |         |          |   |          |         |         |   |          |         |         |                                                                                                                                                                                                                       |                                                                                                                                                                                                                                                                                                                                                                                                                                                                                                                                                                                                                                                                                                                                                                                                                                                                                                                                                                                                                                                                                                                                                                                                                                                                                                                                                                                                                                                                                                                                                                                                                                                                                                                                                                                                                                                                                                                                                                                                                                                                                                                                                                                                                                                                                                                                                                                                                                                                                                         |         |          |         |          |          |         |         |          |         |          |          |          |         |          |                                                                                                                                                                                                                        |                                                                                                                                                                                                                                                                                                                                                                                                                                                                                                                                                                                                                                                                                                                                                                                                                                                                                                                                                                                                                                                                                                                                                                                                                                                                                                                                                                                                                                                                                                                                                                                                                                                                                                                                                                                                                                                                                                                                                                                                                                                                                                                                                                                                                                                                                                                                                                                                                                                                                                                                                                                                                                                                                                                                                                                                |   |          |          |          |   |         |          |          |   |          |          |          |   |          |          |          |   |          |          |         |   |          |          |         |   |          |          |          |   |          |          |          |   |          |          |          |   |         |          |         |   |          |          |         |   |          |         |          |   |          |          |          |   |          |         |          |   |          |          |         |   |          |          |          |   |          |          |         |   |          |         |          |   |          |          |          |   |          |         |          |   |          |          |          |   |          |          |          |   |          |          |          |   |          |          |          |   |          |         |         |   |          |         |         |   |         |          |          |   |          |          |          |   |          |          |          |   |          |          |          |   |          |          |         |   |          |          |         |   |         |         |          |   |         |         |          |   |         |         |          |   |         |         |          |   |          |         |          |   |          |          |         |
| C                                                                                                                                                                                                                     | 1.01549                                                                                                                                                                                                                                                                                                                                                                                                                                                                                                                                                                                                                                                                                                                                                                                                                                                                                                                                                                                                                                                                                                                                                                                                                                                                                                                                                                                                                                                                                                                                                                                                                                                                                                                                                                                                                                                                                                                                                                                                                                                                                                                                                                                                                                                                                                                                                                                                                                                                                                                                                                                                                                                                                                                                                                                      | -0.76946 | 2.79416  |          |          |   |          |         |          |   |          |          |          |   |          |          |          |   |          |         |          |   |          |          |          |   |          |          |          |   |          |          |          |   |          |         |          |   |          |          |         |   |                                                                                                                                                                                                                                                                                                                                                                                                                                                                                                                                                                                                                                                                                                                                                                     |          |         |         |          |          |         |         |          |         |          |          |          |          |         |         |          |          |          |         |          |         |         |          |          |          |          |          |          |          |          |          |          |          |          |         |          |          |          |          |          |          |          |   |          |          |          |   |          |          |          |   |          |          |          |   |          |          |         |   |          |          |         |   |          |          |         |   |          |          |         |   |          |          |          |   |          |          |         |   |          |         |         |   |          |         |          |   |          |         |         |   |          |         |         |                                                                                                                                                                                                                       |                                                                                                                                                                                                                                                                                                                                                                                                                                                                                                                                                                                                                                                                                                                                                                                                                                                                                                                                                                                                                                                                                                                                                                                                                                                                                                                                                                                                                                                                                                                                                                                                                                                                                                                                                                                                                                                                                                                                                                                                                                                                                                                                                                                                                                                                                                                                                                                                                                                                                                         |         |          |         |          |          |         |         |          |         |          |          |          |         |          |                                                                                                                                                                                                                        |                                                                                                                                                                                                                                                                                                                                                                                                                                                                                                                                                                                                                                                                                                                                                                                                                                                                                                                                                                                                                                                                                                                                                                                                                                                                                                                                                                                                                                                                                                                                                                                                                                                                                                                                                                                                                                                                                                                                                                                                                                                                                                                                                                                                                                                                                                                                                                                                                                                                                                                                                                                                                                                                                                                                                                                                |   |          |          |          |   |         |          |          |   |          |          |          |   |          |          |          |   |          |          |         |   |          |          |         |   |          |          |          |   |          |          |          |   |          |          |          |   |         |          |         |   |          |          |         |   |          |         |          |   |          |          |          |   |          |         |          |   |          |          |         |   |          |          |          |   |          |          |         |   |          |         |          |   |          |          |          |   |          |         |          |   |          |          |          |   |          |          |          |   |          |          |          |   |          |          |          |   |          |         |         |   |          |         |         |   |         |          |          |   |          |          |          |   |          |          |          |   |          |          |          |   |          |          |         |   |          |          |         |   |         |         |          |   |         |         |          |   |         |         |          |   |         |         |          |   |          |         |          |   |          |          |         |
| H                                                                                                                                                                                                                     | -1.91861                                                                                                                                                                                                                                                                                                                                                                                                                                                                                                                                                                                                                                                                                                                                                                                                                                                                                                                                                                                                                                                                                                                                                                                                                                                                                                                                                                                                                                                                                                                                                                                                                                                                                                                                                                                                                                                                                                                                                                                                                                                                                                                                                                                                                                                                                                                                                                                                                                                                                                                                                                                                                                                                                                                                                                                     | 0.80843  | 3.46493  |          |          |   |          |         |          |   |          |          |          |   |          |          |          |   |          |         |          |   |          |          |          |   |          |          |          |   |          |          |          |   |          |         |          |   |          |          |         |   |                                                                                                                                                                                                                                                                                                                                                                                                                                                                                                                                                                                                                                                                                                                                                                     |          |         |         |          |          |         |         |          |         |          |          |          |          |         |         |          |          |          |         |          |         |         |          |          |          |          |          |          |          |          |          |          |          |          |         |          |          |          |          |          |          |          |   |          |          |          |   |          |          |          |   |          |          |          |   |          |          |         |   |          |          |         |   |          |          |         |   |          |          |         |   |          |          |          |   |          |          |         |   |          |         |         |   |          |         |          |   |          |         |         |   |          |         |         |                                                                                                                                                                                                                       |                                                                                                                                                                                                                                                                                                                                                                                                                                                                                                                                                                                                                                                                                                                                                                                                                                                                                                                                                                                                                                                                                                                                                                                                                                                                                                                                                                                                                                                                                                                                                                                                                                                                                                                                                                                                                                                                                                                                                                                                                                                                                                                                                                                                                                                                                                                                                                                                                                                                                                         |         |          |         |          |          |         |         |          |         |          |          |          |         |          |                                                                                                                                                                                                                        |                                                                                                                                                                                                                                                                                                                                                                                                                                                                                                                                                                                                                                                                                                                                                                                                                                                                                                                                                                                                                                                                                                                                                                                                                                                                                                                                                                                                                                                                                                                                                                                                                                                                                                                                                                                                                                                                                                                                                                                                                                                                                                                                                                                                                                                                                                                                                                                                                                                                                                                                                                                                                                                                                                                                                                                                |   |          |          |          |   |         |          |          |   |          |          |          |   |          |          |          |   |          |          |         |   |          |          |         |   |          |          |          |   |          |          |          |   |          |          |          |   |         |          |         |   |          |          |         |   |          |         |          |   |          |          |          |   |          |         |          |   |          |          |         |   |          |          |          |   |          |          |         |   |          |         |          |   |          |          |          |   |          |         |          |   |          |          |          |   |          |          |          |   |          |          |          |   |          |          |          |   |          |         |         |   |          |         |         |   |         |          |          |   |          |          |          |   |          |          |          |   |          |          |          |   |          |          |         |   |          |          |         |   |         |         |          |   |         |         |          |   |         |         |          |   |         |         |          |   |          |         |          |   |          |          |         |
| H                                                                                                                                                                                                                     | 1.82664                                                                                                                                                                                                                                                                                                                                                                                                                                                                                                                                                                                                                                                                                                                                                                                                                                                                                                                                                                                                                                                                                                                                                                                                                                                                                                                                                                                                                                                                                                                                                                                                                                                                                                                                                                                                                                                                                                                                                                                                                                                                                                                                                                                                                                                                                                                                                                                                                                                                                                                                                                                                                                                                                                                                                                                      | -1.26750 | 3.30337  |          |          |   |          |         |          |   |          |          |          |   |          |          |          |   |          |         |          |   |          |          |          |   |          |          |          |   |          |          |          |   |          |         |          |   |          |          |         |   |                                                                                                                                                                                                                                                                                                                                                                                                                                                                                                                                                                                                                                                                                                                                                                     |          |         |         |          |          |         |         |          |         |          |          |          |          |         |         |          |          |          |         |          |         |         |          |          |          |          |          |          |          |          |          |          |          |          |         |          |          |          |          |          |          |          |   |          |          |          |   |          |          |          |   |          |          |          |   |          |          |         |   |          |          |         |   |          |          |         |   |          |          |         |   |          |          |          |   |          |          |         |   |          |         |         |   |          |         |          |   |          |         |         |   |          |         |         |                                                                                                                                                                                                                       |                                                                                                                                                                                                                                                                                                                                                                                                                                                                                                                                                                                                                                                                                                                                                                                                                                                                                                                                                                                                                                                                                                                                                                                                                                                                                                                                                                                                                                                                                                                                                                                                                                                                                                                                                                                                                                                                                                                                                                                                                                                                                                                                                                                                                                                                                                                                                                                                                                                                                                         |         |          |         |          |          |         |         |          |         |          |          |          |         |          |                                                                                                                                                                                                                        |                                                                                                                                                                                                                                                                                                                                                                                                                                                                                                                                                                                                                                                                                                                                                                                                                                                                                                                                                                                                                                                                                                                                                                                                                                                                                                                                                                                                                                                                                                                                                                                                                                                                                                                                                                                                                                                                                                                                                                                                                                                                                                                                                                                                                                                                                                                                                                                                                                                                                                                                                                                                                                                                                                                                                                                                |   |          |          |          |   |         |          |          |   |          |          |          |   |          |          |          |   |          |          |         |   |          |          |         |   |          |          |          |   |          |          |          |   |          |          |          |   |         |          |         |   |          |          |         |   |          |         |          |   |          |          |          |   |          |         |          |   |          |          |         |   |          |          |          |   |          |          |         |   |          |         |          |   |          |          |          |   |          |         |          |   |          |          |          |   |          |          |          |   |          |          |          |   |          |          |          |   |          |         |         |   |          |         |         |   |         |          |          |   |          |          |          |   |          |          |          |   |          |          |          |   |          |          |         |   |          |          |         |   |         |         |          |   |         |         |          |   |         |         |          |   |         |         |          |   |          |         |          |   |          |          |         |
| H                                                                                                                                                                                                                     | -0.05732                                                                                                                                                                                                                                                                                                                                                                                                                                                                                                                                                                                                                                                                                                                                                                                                                                                                                                                                                                                                                                                                                                                                                                                                                                                                                                                                                                                                                                                                                                                                                                                                                                                                                                                                                                                                                                                                                                                                                                                                                                                                                                                                                                                                                                                                                                                                                                                                                                                                                                                                                                                                                                                                                                                                                                                     | -0.37555 | 4.60507  |          |          |   |          |         |          |   |          |          |          |   |          |          |          |   |          |         |          |   |          |          |          |   |          |          |          |   |          |          |          |   |          |         |          |   |          |          |         |   |                                                                                                                                                                                                                                                                                                                                                                                                                                                                                                                                                                                                                                                                                                                                                                     |          |         |         |          |          |         |         |          |         |          |          |          |          |         |         |          |          |          |         |          |         |         |          |          |          |          |          |          |          |          |          |          |          |          |         |          |          |          |          |          |          |          |   |          |          |          |   |          |          |          |   |          |          |          |   |          |          |         |   |          |          |         |   |          |          |         |   |          |          |         |   |          |          |          |   |          |          |         |   |          |         |         |   |          |         |          |   |          |         |         |   |          |         |         |                                                                                                                                                                                                                       |                                                                                                                                                                                                                                                                                                                                                                                                                                                                                                                                                                                                                                                                                                                                                                                                                                                                                                                                                                                                                                                                                                                                                                                                                                                                                                                                                                                                                                                                                                                                                                                                                                                                                                                                                                                                                                                                                                                                                                                                                                                                                                                                                                                                                                                                                                                                                                                                                                                                                                         |         |          |         |          |          |         |         |          |         |          |          |          |         |          |                                                                                                                                                                                                                        |                                                                                                                                                                                                                                                                                                                                                                                                                                                                                                                                                                                                                                                                                                                                                                                                                                                                                                                                                                                                                                                                                                                                                                                                                                                                                                                                                                                                                                                                                                                                                                                                                                                                                                                                                                                                                                                                                                                                                                                                                                                                                                                                                                                                                                                                                                                                                                                                                                                                                                                                                                                                                                                                                                                                                                                                |   |          |          |          |   |         |          |          |   |          |          |          |   |          |          |          |   |          |          |         |   |          |          |         |   |          |          |          |   |          |          |          |   |          |          |          |   |         |          |         |   |          |          |         |   |          |         |          |   |          |          |          |   |          |         |          |   |          |          |         |   |          |          |          |   |          |          |         |   |          |         |          |   |          |          |          |   |          |         |          |   |          |          |          |   |          |          |          |   |          |          |          |   |          |          |          |   |          |         |         |   |          |         |         |   |         |          |          |   |          |          |          |   |          |          |          |   |          |          |          |   |          |          |         |   |          |          |         |   |         |         |          |   |         |         |          |   |         |         |          |   |         |         |          |   |          |         |          |   |          |          |         |
| O                                                                                                                                                                                                                     | -1.35263                                                                                                                                                                                                                                                                                                                                                                                                                                                                                                                                                                                                                                                                                                                                                                                                                                                                                                                                                                                                                                                                                                                                                                                                                                                                                                                                                                                                                                                                                                                                                                                                                                                                                                                                                                                                                                                                                                                                                                                                                                                                                                                                                                                                                                                                                                                                                                                                                                                                                                                                                                                                                                                                                                                                                                                     | -1.66397 | -0.94436 |          |          |   |          |         |          |   |          |          |          |   |          |          |          |   |          |         |          |   |          |          |          |   |          |          |          |   |          |          |          |   |          |         |          |   |          |          |         |   |                                                                                                                                                                                                                                                                                                                                                                                                                                                                                                                                                                                                                                                                                                                                                                     |          |         |         |          |          |         |         |          |         |          |          |          |          |         |         |          |          |          |         |          |         |         |          |          |          |          |          |          |          |          |          |          |          |          |         |          |          |          |          |          |          |          |   |          |          |          |   |          |          |          |   |          |          |          |   |          |          |         |   |          |          |         |   |          |          |         |   |          |          |         |   |          |          |          |   |          |          |         |   |          |         |         |   |          |         |          |   |          |         |         |   |          |         |         |                                                                                                                                                                                                                       |                                                                                                                                                                                                                                                                                                                                                                                                                                                                                                                                                                                                                                                                                                                                                                                                                                                                                                                                                                                                                                                                                                                                                                                                                                                                                                                                                                                                                                                                                                                                                                                                                                                                                                                                                                                                                                                                                                                                                                                                                                                                                                                                                                                                                                                                                                                                                                                                                                                                                                         |         |          |         |          |          |         |         |          |         |          |          |          |         |          |                                                                                                                                                                                                                        |                                                                                                                                                                                                                                                                                                                                                                                                                                                                                                                                                                                                                                                                                                                                                                                                                                                                                                                                                                                                                                                                                                                                                                                                                                                                                                                                                                                                                                                                                                                                                                                                                                                                                                                                                                                                                                                                                                                                                                                                                                                                                                                                                                                                                                                                                                                                                                                                                                                                                                                                                                                                                                                                                                                                                                                                |   |          |          |          |   |         |          |          |   |          |          |          |   |          |          |          |   |          |          |         |   |          |          |         |   |          |          |          |   |          |          |          |   |          |          |          |   |         |          |         |   |          |          |         |   |          |         |          |   |          |          |          |   |          |         |          |   |          |          |         |   |          |          |          |   |          |          |         |   |          |         |          |   |          |          |          |   |          |         |          |   |          |          |          |   |          |          |          |   |          |          |          |   |          |          |          |   |          |         |         |   |          |         |         |   |         |          |          |   |          |          |          |   |          |          |          |   |          |          |          |   |          |          |         |   |          |          |         |   |         |         |          |   |         |         |          |   |         |         |          |   |         |         |          |   |          |         |          |   |          |          |         |
| O                                                                                                                                                                                                                     | 2.03212                                                                                                                                                                                                                                                                                                                                                                                                                                                                                                                                                                                                                                                                                                                                                                                                                                                                                                                                                                                                                                                                                                                                                                                                                                                                                                                                                                                                                                                                                                                                                                                                                                                                                                                                                                                                                                                                                                                                                                                                                                                                                                                                                                                                                                                                                                                                                                                                                                                                                                                                                                                                                                                                                                                                                                                      | -1.07981 | 0.61026  |          |          |   |          |         |          |   |          |          |          |   |          |          |          |   |          |         |          |   |          |          |          |   |          |          |          |   |          |          |          |   |          |         |          |   |          |          |         |   |                                                                                                                                                                                                                                                                                                                                                                                                                                                                                                                                                                                                                                                                                                                                                                     |          |         |         |          |          |         |         |          |         |          |          |          |          |         |         |          |          |          |         |          |         |         |          |          |          |          |          |          |          |          |          |          |          |          |         |          |          |          |          |          |          |          |   |          |          |          |   |          |          |          |   |          |          |          |   |          |          |         |   |          |          |         |   |          |          |         |   |          |          |         |   |          |          |          |   |          |          |         |   |          |         |         |   |          |         |          |   |          |         |         |   |          |         |         |                                                                                                                                                                                                                       |                                                                                                                                                                                                                                                                                                                                                                                                                                                                                                                                                                                                                                                                                                                                                                                                                                                                                                                                                                                                                                                                                                                                                                                                                                                                                                                                                                                                                                                                                                                                                                                                                                                                                                                                                                                                                                                                                                                                                                                                                                                                                                                                                                                                                                                                                                                                                                                                                                                                                                         |         |          |         |          |          |         |         |          |         |          |          |          |         |          |                                                                                                                                                                                                                        |                                                                                                                                                                                                                                                                                                                                                                                                                                                                                                                                                                                                                                                                                                                                                                                                                                                                                                                                                                                                                                                                                                                                                                                                                                                                                                                                                                                                                                                                                                                                                                                                                                                                                                                                                                                                                                                                                                                                                                                                                                                                                                                                                                                                                                                                                                                                                                                                                                                                                                                                                                                                                                                                                                                                                                                                |   |          |          |          |   |         |          |          |   |          |          |          |   |          |          |          |   |          |          |         |   |          |          |         |   |          |          |          |   |          |          |          |   |          |          |          |   |         |          |         |   |          |          |         |   |          |         |          |   |          |          |          |   |          |         |          |   |          |          |         |   |          |          |          |   |          |          |         |   |          |         |          |   |          |          |          |   |          |         |          |   |          |          |          |   |          |          |          |   |          |          |          |   |          |          |          |   |          |         |         |   |          |         |         |   |         |          |          |   |          |          |          |   |          |          |          |   |          |          |          |   |          |          |         |   |          |          |         |   |         |         |          |   |         |         |          |   |         |         |          |   |         |         |          |   |          |         |          |   |          |          |         |
| C                                                                                                                                                                                                                     | -1.88985                                                                                                                                                                                                                                                                                                                                                                                                                                                                                                                                                                                                                                                                                                                                                                                                                                                                                                                                                                                                                                                                                                                                                                                                                                                                                                                                                                                                                                                                                                                                                                                                                                                                                                                                                                                                                                                                                                                                                                                                                                                                                                                                                                                                                                                                                                                                                                                                                                                                                                                                                                                                                                                                                                                                                                                     | -2.70805 | -1.74339 |          |          |   |          |         |          |   |          |          |          |   |          |          |          |   |          |         |          |   |          |          |          |   |          |          |          |   |          |          |          |   |          |         |          |   |          |          |         |   |                                                                                                                                                                                                                                                                                                                                                                                                                                                                                                                                                                                                                                                                                                                                                                     |          |         |         |          |          |         |         |          |         |          |          |          |          |         |         |          |          |          |         |          |         |         |          |          |          |          |          |          |          |          |          |          |          |          |         |          |          |          |          |          |          |          |   |          |          |          |   |          |          |          |   |          |          |          |   |          |          |         |   |          |          |         |   |          |          |         |   |          |          |         |   |          |          |          |   |          |          |         |   |          |         |         |   |          |         |          |   |          |         |         |   |          |         |         |                                                                                                                                                                                                                       |                                                                                                                                                                                                                                                                                                                                                                                                                                                                                                                                                                                                                                                                                                                                                                                                                                                                                                                                                                                                                                                                                                                                                                                                                                                                                                                                                                                                                                                                                                                                                                                                                                                                                                                                                                                                                                                                                                                                                                                                                                                                                                                                                                                                                                                                                                                                                                                                                                                                                                         |         |          |         |          |          |         |         |          |         |          |          |          |         |          |                                                                                                                                                                                                                        |                                                                                                                                                                                                                                                                                                                                                                                                                                                                                                                                                                                                                                                                                                                                                                                                                                                                                                                                                                                                                                                                                                                                                                                                                                                                                                                                                                                                                                                                                                                                                                                                                                                                                                                                                                                                                                                                                                                                                                                                                                                                                                                                                                                                                                                                                                                                                                                                                                                                                                                                                                                                                                                                                                                                                                                                |   |          |          |          |   |         |          |          |   |          |          |          |   |          |          |          |   |          |          |         |   |          |          |         |   |          |          |          |   |          |          |          |   |          |          |          |   |         |          |         |   |          |          |         |   |          |         |          |   |          |          |          |   |          |         |          |   |          |          |         |   |          |          |          |   |          |          |         |   |          |         |          |   |          |          |          |   |          |         |          |   |          |          |          |   |          |          |          |   |          |          |          |   |          |          |          |   |          |         |         |   |          |         |         |   |         |          |          |   |          |          |          |   |          |          |          |   |          |          |          |   |          |          |         |   |          |          |         |   |         |         |          |   |         |         |          |   |         |         |          |   |         |         |          |   |          |         |          |   |          |          |         |
| H                                                                                                                                                                                                                     | -1.10062                                                                                                                                                                                                                                                                                                                                                                                                                                                                                                                                                                                                                                                                                                                                                                                                                                                                                                                                                                                                                                                                                                                                                                                                                                                                                                                                                                                                                                                                                                                                                                                                                                                                                                                                                                                                                                                                                                                                                                                                                                                                                                                                                                                                                                                                                                                                                                                                                                                                                                                                                                                                                                                                                                                                                                                     | -3.20817 | -2.31175 |          |          |   |          |         |          |   |          |          |          |   |          |          |          |   |          |         |          |   |          |          |          |   |          |          |          |   |          |          |          |   |          |         |          |   |          |          |         |   |                                                                                                                                                                                                                                                                                                                                                                                                                                                                                                                                                                                                                                                                                                                                                                     |          |         |         |          |          |         |         |          |         |          |          |          |          |         |         |          |          |          |         |          |         |         |          |          |          |          |          |          |          |          |          |          |          |          |         |          |          |          |          |          |          |          |   |          |          |          |   |          |          |          |   |          |          |          |   |          |          |         |   |          |          |         |   |          |          |         |   |          |          |         |   |          |          |          |   |          |          |         |   |          |         |         |   |          |         |          |   |          |         |         |   |          |         |         |                                                                                                                                                                                                                       |                                                                                                                                                                                                                                                                                                                                                                                                                                                                                                                                                                                                                                                                                                                                                                                                                                                                                                                                                                                                                                                                                                                                                                                                                                                                                                                                                                                                                                                                                                                                                                                                                                                                                                                                                                                                                                                                                                                                                                                                                                                                                                                                                                                                                                                                                                                                                                                                                                                                                                         |         |          |         |          |          |         |         |          |         |          |          |          |         |          |                                                                                                                                                                                                                        |                                                                                                                                                                                                                                                                                                                                                                                                                                                                                                                                                                                                                                                                                                                                                                                                                                                                                                                                                                                                                                                                                                                                                                                                                                                                                                                                                                                                                                                                                                                                                                                                                                                                                                                                                                                                                                                                                                                                                                                                                                                                                                                                                                                                                                                                                                                                                                                                                                                                                                                                                                                                                                                                                                                                                                                                |   |          |          |          |   |         |          |          |   |          |          |          |   |          |          |          |   |          |          |         |   |          |          |         |   |          |          |          |   |          |          |          |   |          |          |          |   |         |          |         |   |          |          |         |   |          |         |          |   |          |          |          |   |          |         |          |   |          |          |         |   |          |          |          |   |          |          |         |   |          |         |          |   |          |          |          |   |          |         |          |   |          |          |          |   |          |          |          |   |          |          |          |   |          |          |          |   |          |         |         |   |          |         |         |   |         |          |          |   |          |          |          |   |          |          |          |   |          |          |          |   |          |          |         |   |          |          |         |   |         |         |          |   |         |         |          |   |         |         |          |   |         |         |          |   |          |         |          |   |          |          |         |
| H                                                                                                                                                                                                                     | -2.64449                                                                                                                                                                                                                                                                                                                                                                                                                                                                                                                                                                                                                                                                                                                                                                                                                                                                                                                                                                                                                                                                                                                                                                                                                                                                                                                                                                                                                                                                                                                                                                                                                                                                                                                                                                                                                                                                                                                                                                                                                                                                                                                                                                                                                                                                                                                                                                                                                                                                                                                                                                                                                                                                                                                                                                                     | -2.32782 | -2.43952 |          |          |   |          |         |          |   |          |          |          |   |          |          |          |   |          |         |          |   |          |          |          |   |          |          |          |   |          |          |          |   |          |         |          |   |          |          |         |   |                                                                                                                                                                                                                                                                                                                                                                                                                                                                                                                                                                                                                                                                                                                                                                     |          |         |         |          |          |         |         |          |         |          |          |          |          |         |         |          |          |          |         |          |         |         |          |          |          |          |          |          |          |          |          |          |          |          |         |          |          |          |          |          |          |          |   |          |          |          |   |          |          |          |   |          |          |          |   |          |          |         |   |          |          |         |   |          |          |         |   |          |          |         |   |          |          |          |   |          |          |         |   |          |         |         |   |          |         |          |   |          |         |         |   |          |         |         |                                                                                                                                                                                                                       |                                                                                                                                                                                                                                                                                                                                                                                                                                                                                                                                                                                                                                                                                                                                                                                                                                                                                                                                                                                                                                                                                                                                                                                                                                                                                                                                                                                                                                                                                                                                                                                                                                                                                                                                                                                                                                                                                                                                                                                                                                                                                                                                                                                                                                                                                                                                                                                                                                                                                                         |         |          |         |          |          |         |         |          |         |          |          |          |         |          |                                                                                                                                                                                                                        |                                                                                                                                                                                                                                                                                                                                                                                                                                                                                                                                                                                                                                                                                                                                                                                                                                                                                                                                                                                                                                                                                                                                                                                                                                                                                                                                                                                                                                                                                                                                                                                                                                                                                                                                                                                                                                                                                                                                                                                                                                                                                                                                                                                                                                                                                                                                                                                                                                                                                                                                                                                                                                                                                                                                                                                                |   |          |          |          |   |         |          |          |   |          |          |          |   |          |          |          |   |          |          |         |   |          |          |         |   |          |          |          |   |          |          |          |   |          |          |          |   |         |          |         |   |          |          |         |   |          |         |          |   |          |          |          |   |          |         |          |   |          |          |         |   |          |          |          |   |          |          |         |   |          |         |          |   |          |          |          |   |          |         |          |   |          |          |          |   |          |          |          |   |          |          |          |   |          |          |          |   |          |         |         |   |          |         |         |   |         |          |          |   |          |          |          |   |          |          |          |   |          |          |          |   |          |          |         |   |          |          |         |   |         |         |          |   |         |         |          |   |         |         |          |   |         |         |          |   |          |         |          |   |          |          |         |
| H                                                                                                                                                                                                                     | -2.34915                                                                                                                                                                                                                                                                                                                                                                                                                                                                                                                                                                                                                                                                                                                                                                                                                                                                                                                                                                                                                                                                                                                                                                                                                                                                                                                                                                                                                                                                                                                                                                                                                                                                                                                                                                                                                                                                                                                                                                                                                                                                                                                                                                                                                                                                                                                                                                                                                                                                                                                                                                                                                                                                                                                                                                                     | -3.41141 | -1.05187 |          |          |   |          |         |          |   |          |          |          |   |          |          |          |   |          |         |          |   |          |          |          |   |          |          |          |   |          |          |          |   |          |         |          |   |          |          |         |   |                                                                                                                                                                                                                                                                                                                                                                                                                                                                                                                                                                                                                                                                                                                                                                     |          |         |         |          |          |         |         |          |         |          |          |          |          |         |         |          |          |          |         |          |         |         |          |          |          |          |          |          |          |          |          |          |          |          |         |          |          |          |          |          |          |          |   |          |          |          |   |          |          |          |   |          |          |          |   |          |          |         |   |          |          |         |   |          |          |         |   |          |          |         |   |          |          |          |   |          |          |         |   |          |         |         |   |          |         |          |   |          |         |         |   |          |         |         |                                                                                                                                                                                                                       |                                                                                                                                                                                                                                                                                                                                                                                                                                                                                                                                                                                                                                                                                                                                                                                                                                                                                                                                                                                                                                                                                                                                                                                                                                                                                                                                                                                                                                                                                                                                                                                                                                                                                                                                                                                                                                                                                                                                                                                                                                                                                                                                                                                                                                                                                                                                                                                                                                                                                                         |         |          |         |          |          |         |         |          |         |          |          |          |         |          |                                                                                                                                                                                                                        |                                                                                                                                                                                                                                                                                                                                                                                                                                                                                                                                                                                                                                                                                                                                                                                                                                                                                                                                                                                                                                                                                                                                                                                                                                                                                                                                                                                                                                                                                                                                                                                                                                                                                                                                                                                                                                                                                                                                                                                                                                                                                                                                                                                                                                                                                                                                                                                                                                                                                                                                                                                                                                                                                                                                                                                                |   |          |          |          |   |         |          |          |   |          |          |          |   |          |          |          |   |          |          |         |   |          |          |         |   |          |          |          |   |          |          |          |   |          |          |          |   |         |          |         |   |          |          |         |   |          |         |          |   |          |          |          |   |          |         |          |   |          |          |         |   |          |          |          |   |          |          |         |   |          |         |          |   |          |          |          |   |          |         |          |   |          |          |          |   |          |          |          |   |          |          |          |   |          |          |          |   |          |         |         |   |          |         |         |   |         |          |          |   |          |          |          |   |          |          |          |   |          |          |          |   |          |          |         |   |          |          |         |   |         |         |          |   |         |         |          |   |         |         |          |   |         |         |          |   |          |         |          |   |          |          |         |
| C                                                                                                                                                                                                                     | 3.20143                                                                                                                                                                                                                                                                                                                                                                                                                                                                                                                                                                                                                                                                                                                                                                                                                                                                                                                                                                                                                                                                                                                                                                                                                                                                                                                                                                                                                                                                                                                                                                                                                                                                                                                                                                                                                                                                                                                                                                                                                                                                                                                                                                                                                                                                                                                                                                                                                                                                                                                                                                                                                                                                                                                                                                                      | -1.59896 | 1.22417  |          |          |   |          |         |          |   |          |          |          |   |          |          |          |   |          |         |          |   |          |          |          |   |          |          |          |   |          |          |          |   |          |         |          |   |          |          |         |   |                                                                                                                                                                                                                                                                                                                                                                                                                                                                                                                                                                                                                                                                                                                                                                     |          |         |         |          |          |         |         |          |         |          |          |          |          |         |         |          |          |          |         |          |         |         |          |          |          |          |          |          |          |          |          |          |          |          |         |          |          |          |          |          |          |          |   |          |          |          |   |          |          |          |   |          |          |          |   |          |          |         |   |          |          |         |   |          |          |         |   |          |          |         |   |          |          |          |   |          |          |         |   |          |         |         |   |          |         |          |   |          |         |         |   |          |         |         |                                                                                                                                                                                                                       |                                                                                                                                                                                                                                                                                                                                                                                                                                                                                                                                                                                                                                                                                                                                                                                                                                                                                                                                                                                                                                                                                                                                                                                                                                                                                                                                                                                                                                                                                                                                                                                                                                                                                                                                                                                                                                                                                                                                                                                                                                                                                                                                                                                                                                                                                                                                                                                                                                                                                                         |         |          |         |          |          |         |         |          |         |          |          |          |         |          |                                                                                                                                                                                                                        |                                                                                                                                                                                                                                                                                                                                                                                                                                                                                                                                                                                                                                                                                                                                                                                                                                                                                                                                                                                                                                                                                                                                                                                                                                                                                                                                                                                                                                                                                                                                                                                                                                                                                                                                                                                                                                                                                                                                                                                                                                                                                                                                                                                                                                                                                                                                                                                                                                                                                                                                                                                                                                                                                                                                                                                                |   |          |          |          |   |         |          |          |   |          |          |          |   |          |          |          |   |          |          |         |   |          |          |         |   |          |          |          |   |          |          |          |   |          |          |          |   |         |          |         |   |          |          |         |   |          |         |          |   |          |          |          |   |          |         |          |   |          |          |         |   |          |          |          |   |          |          |         |   |          |         |          |   |          |          |          |   |          |         |          |   |          |          |          |   |          |          |          |   |          |          |          |   |          |          |          |   |          |         |         |   |          |         |         |   |         |          |          |   |          |          |          |   |          |          |          |   |          |          |          |   |          |          |         |   |          |          |         |   |         |         |          |   |         |         |          |   |         |         |          |   |         |         |          |   |          |         |          |   |          |          |         |
| H                                                                                                                                                                                                                     | 3.65231                                                                                                                                                                                                                                                                                                                                                                                                                                                                                                                                                                                                                                                                                                                                                                                                                                                                                                                                                                                                                                                                                                                                                                                                                                                                                                                                                                                                                                                                                                                                                                                                                                                                                                                                                                                                                                                                                                                                                                                                                                                                                                                                                                                                                                                                                                                                                                                                                                                                                                                                                                                                                                                                                                                                                                                      | -0.85758 | 1.89034  |          |          |   |          |         |          |   |          |          |          |   |          |          |          |   |          |         |          |   |          |          |          |   |          |          |          |   |          |          |          |   |          |         |          |   |          |          |         |   |                                                                                                                                                                                                                                                                                                                                                                                                                                                                                                                                                                                                                                                                                                                                                                     |          |         |         |          |          |         |         |          |         |          |          |          |          |         |         |          |          |          |         |          |         |         |          |          |          |          |          |          |          |          |          |          |          |          |         |          |          |          |          |          |          |          |   |          |          |          |   |          |          |          |   |          |          |          |   |          |          |         |   |          |          |         |   |          |          |         |   |          |          |         |   |          |          |          |   |          |          |         |   |          |         |         |   |          |         |          |   |          |         |         |   |          |         |         |                                                                                                                                                                                                                       |                                                                                                                                                                                                                                                                                                                                                                                                                                                                                                                                                                                                                                                                                                                                                                                                                                                                                                                                                                                                                                                                                                                                                                                                                                                                                                                                                                                                                                                                                                                                                                                                                                                                                                                                                                                                                                                                                                                                                                                                                                                                                                                                                                                                                                                                                                                                                                                                                                                                                                         |         |          |         |          |          |         |         |          |         |          |          |          |         |          |                                                                                                                                                                                                                        |                                                                                                                                                                                                                                                                                                                                                                                                                                                                                                                                                                                                                                                                                                                                                                                                                                                                                                                                                                                                                                                                                                                                                                                                                                                                                                                                                                                                                                                                                                                                                                                                                                                                                                                                                                                                                                                                                                                                                                                                                                                                                                                                                                                                                                                                                                                                                                                                                                                                                                                                                                                                                                                                                                                                                                                                |   |          |          |          |   |         |          |          |   |          |          |          |   |          |          |          |   |          |          |         |   |          |          |         |   |          |          |          |   |          |          |          |   |          |          |          |   |         |          |         |   |          |          |         |   |          |         |          |   |          |          |          |   |          |         |          |   |          |          |         |   |          |          |          |   |          |          |         |   |          |         |          |   |          |          |          |   |          |         |          |   |          |          |          |   |          |          |          |   |          |          |          |   |          |          |          |   |          |         |         |   |          |         |         |   |         |          |          |   |          |          |          |   |          |          |          |   |          |          |          |   |          |          |         |   |          |          |         |   |         |         |          |   |         |         |          |   |         |         |          |   |         |         |          |   |          |         |          |   |          |          |         |
| H                                                                                                                                                                                                                     | 3.88794                                                                                                                                                                                                                                                                                                                                                                                                                                                                                                                                                                                                                                                                                                                                                                                                                                                                                                                                                                                                                                                                                                                                                                                                                                                                                                                                                                                                                                                                                                                                                                                                                                                                                                                                                                                                                                                                                                                                                                                                                                                                                                                                                                                                                                                                                                                                                                                                                                                                                                                                                                                                                                                                                                                                                                                      | -1.82925 | 0.41296  |          |          |   |          |         |          |   |          |          |          |   |          |          |          |   |          |         |          |   |          |          |          |   |          |          |          |   |          |          |          |   |          |         |          |   |          |          |         |   |                                                                                                                                                                                                                                                                                                                                                                                                                                                                                                                                                                                                                                                                                                                                                                     |          |         |         |          |          |         |         |          |         |          |          |          |          |         |         |          |          |          |         |          |         |         |          |          |          |          |          |          |          |          |          |          |          |          |         |          |          |          |          |          |          |          |   |          |          |          |   |          |          |          |   |          |          |          |   |          |          |         |   |          |          |         |   |          |          |         |   |          |          |         |   |          |          |          |   |          |          |         |   |          |         |         |   |          |         |          |   |          |         |         |   |          |         |         |                                                                                                                                                                                                                       |                                                                                                                                                                                                                                                                                                                                                                                                                                                                                                                                                                                                                                                                                                                                                                                                                                                                                                                                                                                                                                                                                                                                                                                                                                                                                                                                                                                                                                                                                                                                                                                                                                                                                                                                                                                                                                                                                                                                                                                                                                                                                                                                                                                                                                                                                                                                                                                                                                                                                                         |         |          |         |          |          |         |         |          |         |          |          |          |         |          |                                                                                                                                                                                                                        |                                                                                                                                                                                                                                                                                                                                                                                                                                                                                                                                                                                                                                                                                                                                                                                                                                                                                                                                                                                                                                                                                                                                                                                                                                                                                                                                                                                                                                                                                                                                                                                                                                                                                                                                                                                                                                                                                                                                                                                                                                                                                                                                                                                                                                                                                                                                                                                                                                                                                                                                                                                                                                                                                                                                                                                                |   |          |          |          |   |         |          |          |   |          |          |          |   |          |          |          |   |          |          |         |   |          |          |         |   |          |          |          |   |          |          |          |   |          |          |          |   |         |          |         |   |          |          |         |   |          |         |          |   |          |          |          |   |          |         |          |   |          |          |         |   |          |          |          |   |          |          |         |   |          |         |          |   |          |          |          |   |          |         |          |   |          |          |          |   |          |          |          |   |          |          |          |   |          |          |          |   |          |         |         |   |          |         |         |   |         |          |          |   |          |          |          |   |          |          |          |   |          |          |          |   |          |          |         |   |          |          |         |   |         |         |          |   |         |         |          |   |         |         |          |   |         |         |          |   |          |         |          |   |          |          |         |
| H                                                                                                                                                                                                                     | 2.97861                                                                                                                                                                                                                                                                                                                                                                                                                                                                                                                                                                                                                                                                                                                                                                                                                                                                                                                                                                                                                                                                                                                                                                                                                                                                                                                                                                                                                                                                                                                                                                                                                                                                                                                                                                                                                                                                                                                                                                                                                                                                                                                                                                                                                                                                                                                                                                                                                                                                                                                                                                                                                                                                                                                                                                                      | -2.50830 | 1.79160  |          |          |   |          |         |          |   |          |          |          |   |          |          |          |   |          |         |          |   |          |          |          |   |          |          |          |   |          |          |          |   |          |         |          |   |          |          |         |   |                                                                                                                                                                                                                                                                                                                                                                                                                                                                                                                                                                                                                                                                                                                                                                     |          |         |         |          |          |         |         |          |         |          |          |          |          |         |         |          |          |          |         |          |         |         |          |          |          |          |          |          |          |          |          |          |          |          |         |          |          |          |          |          |          |          |   |          |          |          |   |          |          |          |   |          |          |          |   |          |          |         |   |          |          |         |   |          |          |         |   |          |          |         |   |          |          |          |   |          |          |         |   |          |         |         |   |          |         |          |   |          |         |         |   |          |         |         |                                                                                                                                                                                                                       |                                                                                                                                                                                                                                                                                                                                                                                                                                                                                                                                                                                                                                                                                                                                                                                                                                                                                                                                                                                                                                                                                                                                                                                                                                                                                                                                                                                                                                                                                                                                                                                                                                                                                                                                                                                                                                                                                                                                                                                                                                                                                                                                                                                                                                                                                                                                                                                                                                                                                                         |         |          |         |          |          |         |         |          |         |          |          |          |         |          |                                                                                                                                                                                                                        |                                                                                                                                                                                                                                                                                                                                                                                                                                                                                                                                                                                                                                                                                                                                                                                                                                                                                                                                                                                                                                                                                                                                                                                                                                                                                                                                                                                                                                                                                                                                                                                                                                                                                                                                                                                                                                                                                                                                                                                                                                                                                                                                                                                                                                                                                                                                                                                                                                                                                                                                                                                                                                                                                                                                                                                                |   |          |          |          |   |         |          |          |   |          |          |          |   |          |          |          |   |          |          |         |   |          |          |         |   |          |          |          |   |          |          |          |   |          |          |          |   |         |          |         |   |          |          |         |   |          |         |          |   |          |          |          |   |          |         |          |   |          |          |         |   |          |          |          |   |          |          |         |   |          |         |          |   |          |          |          |   |          |         |          |   |          |          |          |   |          |          |          |   |          |          |          |   |          |          |          |   |          |         |         |   |          |         |         |   |         |          |          |   |          |          |          |   |          |          |          |   |          |          |          |   |          |          |         |   |          |          |         |   |         |         |          |   |         |         |          |   |         |         |          |   |         |         |          |   |          |         |          |   |          |          |         |
| C                                                                                                                                                                                                                     | 1.57293                                                                                                                                                                                                                                                                                                                                                                                                                                                                                                                                                                                                                                                                                                                                                                                                                                                                                                                                                                                                                                                                                                                                                                                                                                                                                                                                                                                                                                                                                                                                                                                                                                                                                                                                                                                                                                                                                                                                                                                                                                                                                                                                                                                                                                                                                                                                                                                                                                                                                                                                                                                                                                                                                                                                                                                      | 2.24599  | -0.48216 |          |          |   |          |         |          |   |          |          |          |   |          |          |          |   |          |         |          |   |          |          |          |   |          |          |          |   |          |          |          |   |          |         |          |   |          |          |         |   |                                                                                                                                                                                                                                                                                                                                                                                                                                                                                                                                                                                                                                                                                                                                                                     |          |         |         |          |          |         |         |          |         |          |          |          |          |         |         |          |          |          |         |          |         |         |          |          |          |          |          |          |          |          |          |          |          |          |         |          |          |          |          |          |          |          |   |          |          |          |   |          |          |          |   |          |          |          |   |          |          |         |   |          |          |         |   |          |          |         |   |          |          |         |   |          |          |          |   |          |          |         |   |          |         |         |   |          |         |          |   |          |         |         |   |          |         |         |                                                                                                                                                                                                                       |                                                                                                                                                                                                                                                                                                                                                                                                                                                                                                                                                                                                                                                                                                                                                                                                                                                                                                                                                                                                                                                                                                                                                                                                                                                                                                                                                                                                                                                                                                                                                                                                                                                                                                                                                                                                                                                                                                                                                                                                                                                                                                                                                                                                                                                                                                                                                                                                                                                                                                         |         |          |         |          |          |         |         |          |         |          |          |          |         |          |                                                                                                                                                                                                                        |                                                                                                                                                                                                                                                                                                                                                                                                                                                                                                                                                                                                                                                                                                                                                                                                                                                                                                                                                                                                                                                                                                                                                                                                                                                                                                                                                                                                                                                                                                                                                                                                                                                                                                                                                                                                                                                                                                                                                                                                                                                                                                                                                                                                                                                                                                                                                                                                                                                                                                                                                                                                                                                                                                                                                                                                |   |          |          |          |   |         |          |          |   |          |          |          |   |          |          |          |   |          |          |         |   |          |          |         |   |          |          |          |   |          |          |          |   |          |          |          |   |         |          |         |   |          |          |         |   |          |         |          |   |          |          |          |   |          |         |          |   |          |          |         |   |          |          |          |   |          |          |         |   |          |         |          |   |          |          |          |   |          |         |          |   |          |          |          |   |          |          |          |   |          |          |          |   |          |          |          |   |          |         |         |   |          |         |         |   |         |          |          |   |          |          |          |   |          |          |          |   |          |          |          |   |          |          |         |   |          |          |         |   |         |         |          |   |         |         |          |   |         |         |          |   |         |         |          |   |          |         |          |   |          |          |         |
| N                                                                                                                                                                                                                     | 0.87276                                                                                                                                                                                                                                                                                                                                                                                                                                                                                                                                                                                                                                                                                                                                                                                                                                                                                                                                                                                                                                                                                                                                                                                                                                                                                                                                                                                                                                                                                                                                                                                                                                                                                                                                                                                                                                                                                                                                                                                                                                                                                                                                                                                                                                                                                                                                                                                                                                                                                                                                                                                                                                                                                                                                                                                      | 2.94986  | 0.43605  |          |          |   |          |         |          |   |          |          |          |   |          |          |          |   |          |         |          |   |          |          |          |   |          |          |          |   |          |          |          |   |          |         |          |   |          |          |         |   |                                                                                                                                                                                                                                                                                                                                                                                                                                                                                                                                                                                                                                                                                                                                                                     |          |         |         |          |          |         |         |          |         |          |          |          |          |         |         |          |          |          |         |          |         |         |          |          |          |          |          |          |          |          |          |          |          |          |         |          |          |          |          |          |          |          |   |          |          |          |   |          |          |          |   |          |          |          |   |          |          |         |   |          |          |         |   |          |          |         |   |          |          |         |   |          |          |          |   |          |          |         |   |          |         |         |   |          |         |          |   |          |         |         |   |          |         |         |                                                                                                                                                                                                                       |                                                                                                                                                                                                                                                                                                                                                                                                                                                                                                                                                                                                                                                                                                                                                                                                                                                                                                                                                                                                                                                                                                                                                                                                                                                                                                                                                                                                                                                                                                                                                                                                                                                                                                                                                                                                                                                                                                                                                                                                                                                                                                                                                                                                                                                                                                                                                                                                                                                                                                         |         |          |         |          |          |         |         |          |         |          |          |          |         |          |                                                                                                                                                                                                                        |                                                                                                                                                                                                                                                                                                                                                                                                                                                                                                                                                                                                                                                                                                                                                                                                                                                                                                                                                                                                                                                                                                                                                                                                                                                                                                                                                                                                                                                                                                                                                                                                                                                                                                                                                                                                                                                                                                                                                                                                                                                                                                                                                                                                                                                                                                                                                                                                                                                                                                                                                                                                                                                                                                                                                                                                |   |          |          |          |   |         |          |          |   |          |          |          |   |          |          |          |   |          |          |         |   |          |          |         |   |          |          |          |   |          |          |          |   |          |          |          |   |         |          |         |   |          |          |         |   |          |         |          |   |          |          |          |   |          |         |          |   |          |          |         |   |          |          |          |   |          |          |         |   |          |         |          |   |          |          |          |   |          |         |          |   |          |          |          |   |          |          |          |   |          |          |          |   |          |          |          |   |          |         |         |   |          |         |         |   |         |          |          |   |          |          |          |   |          |          |          |   |          |          |          |   |          |          |         |   |          |          |         |   |         |         |          |   |         |         |          |   |         |         |          |   |         |         |          |   |          |         |          |   |          |          |         |
| H                                                                                                                                                                                                                     | -0.12805                                                                                                                                                                                                                                                                                                                                                                                                                                                                                                                                                                                                                                                                                                                                                                                                                                                                                                                                                                                                                                                                                                                                                                                                                                                                                                                                                                                                                                                                                                                                                                                                                                                                                                                                                                                                                                                                                                                                                                                                                                                                                                                                                                                                                                                                                                                                                                                                                                                                                                                                                                                                                                                                                                                                                                                     | 2.86940  | 0.56376  |          |          |   |          |         |          |   |          |          |          |   |          |          |          |   |          |         |          |   |          |          |          |   |          |          |          |   |          |          |          |   |          |         |          |   |          |          |         |   |                                                                                                                                                                                                                                                                                                                                                                                                                                                                                                                                                                                                                                                                                                                                                                     |          |         |         |          |          |         |         |          |         |          |          |          |          |         |         |          |          |          |         |          |         |         |          |          |          |          |          |          |          |          |          |          |          |          |         |          |          |          |          |          |          |          |   |          |          |          |   |          |          |          |   |          |          |          |   |          |          |         |   |          |          |         |   |          |          |         |   |          |          |         |   |          |          |          |   |          |          |         |   |          |         |         |   |          |         |          |   |          |         |         |   |          |         |         |                                                                                                                                                                                                                       |                                                                                                                                                                                                                                                                                                                                                                                                                                                                                                                                                                                                                                                                                                                                                                                                                                                                                                                                                                                                                                                                                                                                                                                                                                                                                                                                                                                                                                                                                                                                                                                                                                                                                                                                                                                                                                                                                                                                                                                                                                                                                                                                                                                                                                                                                                                                                                                                                                                                                                         |         |          |         |          |          |         |         |          |         |          |          |          |         |          |                                                                                                                                                                                                                        |                                                                                                                                                                                                                                                                                                                                                                                                                                                                                                                                                                                                                                                                                                                                                                                                                                                                                                                                                                                                                                                                                                                                                                                                                                                                                                                                                                                                                                                                                                                                                                                                                                                                                                                                                                                                                                                                                                                                                                                                                                                                                                                                                                                                                                                                                                                                                                                                                                                                                                                                                                                                                                                                                                                                                                                                |   |          |          |          |   |         |          |          |   |          |          |          |   |          |          |          |   |          |          |         |   |          |          |         |   |          |          |          |   |          |          |          |   |          |          |          |   |         |          |         |   |          |          |         |   |          |         |          |   |          |          |          |   |          |         |          |   |          |          |         |   |          |          |          |   |          |          |         |   |          |         |          |   |          |          |          |   |          |         |          |   |          |          |          |   |          |          |          |   |          |          |          |   |          |          |          |   |          |         |         |   |          |         |         |   |         |          |          |   |          |          |          |   |          |          |          |   |          |          |          |   |          |          |         |   |          |          |         |   |         |         |          |   |         |         |          |   |         |         |          |   |         |         |          |   |          |         |          |   |          |          |         |
| H                                                                                                                                                                                                                     | 1.37765                                                                                                                                                                                                                                                                                                                                                                                                                                                                                                                                                                                                                                                                                                                                                                                                                                                                                                                                                                                                                                                                                                                                                                                                                                                                                                                                                                                                                                                                                                                                                                                                                                                                                                                                                                                                                                                                                                                                                                                                                                                                                                                                                                                                                                                                                                                                                                                                                                                                                                                                                                                                                                                                                                                                                                                      | 3.63252  | 0.97615  |          |          |   |          |         |          |   |          |          |          |   |          |          |          |   |          |         |          |   |          |          |          |   |          |          |          |   |          |          |          |   |          |         |          |   |          |          |         |   |                                                                                                                                                                                                                                                                                                                                                                                                                                                                                                                                                                                                                                                                                                                                                                     |          |         |         |          |          |         |         |          |         |          |          |          |          |         |         |          |          |          |         |          |         |         |          |          |          |          |          |          |          |          |          |          |          |          |         |          |          |          |          |          |          |          |   |          |          |          |   |          |          |          |   |          |          |          |   |          |          |         |   |          |          |         |   |          |          |         |   |          |          |         |   |          |          |          |   |          |          |         |   |          |         |         |   |          |         |          |   |          |         |         |   |          |         |         |                                                                                                                                                                                                                       |                                                                                                                                                                                                                                                                                                                                                                                                                                                                                                                                                                                                                                                                                                                                                                                                                                                                                                                                                                                                                                                                                                                                                                                                                                                                                                                                                                                                                                                                                                                                                                                                                                                                                                                                                                                                                                                                                                                                                                                                                                                                                                                                                                                                                                                                                                                                                                                                                                                                                                         |         |          |         |          |          |         |         |          |         |          |          |          |         |          |                                                                                                                                                                                                                        |                                                                                                                                                                                                                                                                                                                                                                                                                                                                                                                                                                                                                                                                                                                                                                                                                                                                                                                                                                                                                                                                                                                                                                                                                                                                                                                                                                                                                                                                                                                                                                                                                                                                                                                                                                                                                                                                                                                                                                                                                                                                                                                                                                                                                                                                                                                                                                                                                                                                                                                                                                                                                                                                                                                                                                                                |   |          |          |          |   |         |          |          |   |          |          |          |   |          |          |          |   |          |          |         |   |          |          |         |   |          |          |          |   |          |          |          |   |          |          |          |   |         |          |         |   |          |          |         |   |          |         |          |   |          |          |          |   |          |         |          |   |          |          |         |   |          |          |          |   |          |          |         |   |          |         |          |   |          |          |          |   |          |         |          |   |          |          |          |   |          |          |          |   |          |          |          |   |          |          |          |   |          |         |         |   |          |         |         |   |         |          |          |   |          |          |          |   |          |          |          |   |          |          |          |   |          |          |         |   |          |          |         |   |         |         |          |   |         |         |          |   |         |         |          |   |         |         |          |   |          |         |          |   |          |          |         |
| C                                                                                                                                                                                                                     | -2.14785                                                                                                                                                                                                                                                                                                                                                                                                                                                                                                                                                                                                                                                                                                                                                                                                                                                                                                                                                                                                                                                                                                                                                                                                                                                                                                                                                                                                                                                                                                                                                                                                                                                                                                                                                                                                                                                                                                                                                                                                                                                                                                                                                                                                                                                                                                                                                                                                                                                                                                                                                                                                                                                                                                                                                                                     | 1.32426  | 0.82318  |          |          |   |          |         |          |   |          |          |          |   |          |          |          |   |          |         |          |   |          |          |          |   |          |          |          |   |          |          |          |   |          |         |          |   |          |          |         |   |                                                                                                                                                                                                                                                                                                                                                                                                                                                                                                                                                                                                                                                                                                                                                                     |          |         |         |          |          |         |         |          |         |          |          |          |          |         |         |          |          |          |         |          |         |         |          |          |          |          |          |          |          |          |          |          |          |          |         |          |          |          |          |          |          |          |   |          |          |          |   |          |          |          |   |          |          |          |   |          |          |         |   |          |          |         |   |          |          |         |   |          |          |         |   |          |          |          |   |          |          |         |   |          |         |         |   |          |         |          |   |          |         |         |   |          |         |         |                                                                                                                                                                                                                       |                                                                                                                                                                                                                                                                                                                                                                                                                                                                                                                                                                                                                                                                                                                                                                                                                                                                                                                                                                                                                                                                                                                                                                                                                                                                                                                                                                                                                                                                                                                                                                                                                                                                                                                                                                                                                                                                                                                                                                                                                                                                                                                                                                                                                                                                                                                                                                                                                                                                                                         |         |          |         |          |          |         |         |          |         |          |          |          |         |          |                                                                                                                                                                                                                        |                                                                                                                                                                                                                                                                                                                                                                                                                                                                                                                                                                                                                                                                                                                                                                                                                                                                                                                                                                                                                                                                                                                                                                                                                                                                                                                                                                                                                                                                                                                                                                                                                                                                                                                                                                                                                                                                                                                                                                                                                                                                                                                                                                                                                                                                                                                                                                                                                                                                                                                                                                                                                                                                                                                                                                                                |   |          |          |          |   |         |          |          |   |          |          |          |   |          |          |          |   |          |          |         |   |          |          |         |   |          |          |          |   |          |          |          |   |          |          |          |   |         |          |         |   |          |          |         |   |          |         |          |   |          |          |          |   |          |         |          |   |          |          |         |   |          |          |          |   |          |          |         |   |          |         |          |   |          |          |          |   |          |         |          |   |          |          |          |   |          |          |          |   |          |          |          |   |          |          |          |   |          |         |         |   |          |         |         |   |         |          |          |   |          |          |          |   |          |          |          |   |          |          |          |   |          |          |         |   |          |          |         |   |         |         |          |   |         |         |          |   |         |         |          |   |         |         |          |   |          |         |          |   |          |          |         |
| N                                                                                                                                                                                                                     | -3.10739                                                                                                                                                                                                                                                                                                                                                                                                                                                                                                                                                                                                                                                                                                                                                                                                                                                                                                                                                                                                                                                                                                                                                                                                                                                                                                                                                                                                                                                                                                                                                                                                                                                                                                                                                                                                                                                                                                                                                                                                                                                                                                                                                                                                                                                                                                                                                                                                                                                                                                                                                                                                                                                                                                                                                                                     | 0.60017  | 0.20432  |          |          |   |          |         |          |   |          |          |          |   |          |          |          |   |          |         |          |   |          |          |          |   |          |          |          |   |          |          |          |   |          |         |          |   |          |          |         |   |                                                                                                                                                                                                                                                                                                                                                                                                                                                                                                                                                                                                                                                                                                                                                                     |          |         |         |          |          |         |         |          |         |          |          |          |          |         |         |          |          |          |         |          |         |         |          |          |          |          |          |          |          |          |          |          |          |          |         |          |          |          |          |          |          |          |   |          |          |          |   |          |          |          |   |          |          |          |   |          |          |         |   |          |          |         |   |          |          |         |   |          |          |         |   |          |          |          |   |          |          |         |   |          |         |         |   |          |         |          |   |          |         |         |   |          |         |         |                                                                                                                                                                                                                       |                                                                                                                                                                                                                                                                                                                                                                                                                                                                                                                                                                                                                                                                                                                                                                                                                                                                                                                                                                                                                                                                                                                                                                                                                                                                                                                                                                                                                                                                                                                                                                                                                                                                                                                                                                                                                                                                                                                                                                                                                                                                                                                                                                                                                                                                                                                                                                                                                                                                                                         |         |          |         |          |          |         |         |          |         |          |          |          |         |          |                                                                                                                                                                                                                        |                                                                                                                                                                                                                                                                                                                                                                                                                                                                                                                                                                                                                                                                                                                                                                                                                                                                                                                                                                                                                                                                                                                                                                                                                                                                                                                                                                                                                                                                                                                                                                                                                                                                                                                                                                                                                                                                                                                                                                                                                                                                                                                                                                                                                                                                                                                                                                                                                                                                                                                                                                                                                                                                                                                                                                                                |   |          |          |          |   |         |          |          |   |          |          |          |   |          |          |          |   |          |          |         |   |          |          |         |   |          |          |          |   |          |          |          |   |          |          |          |   |         |          |         |   |          |          |         |   |          |         |          |   |          |          |          |   |          |         |          |   |          |          |         |   |          |          |          |   |          |          |         |   |          |         |          |   |          |          |          |   |          |         |          |   |          |          |          |   |          |          |          |   |          |          |          |   |          |          |          |   |          |         |         |   |          |         |         |   |         |          |          |   |          |          |          |   |          |          |          |   |          |          |          |   |          |          |         |   |          |          |         |   |         |         |          |   |         |         |          |   |         |         |          |   |         |         |          |   |          |         |          |   |          |          |         |
| H                                                                                                                                                                                                                     | -3.76856                                                                                                                                                                                                                                                                                                                                                                                                                                                                                                                                                                                                                                                                                                                                                                                                                                                                                                                                                                                                                                                                                                                                                                                                                                                                                                                                                                                                                                                                                                                                                                                                                                                                                                                                                                                                                                                                                                                                                                                                                                                                                                                                                                                                                                                                                                                                                                                                                                                                                                                                                                                                                                                                                                                                                                                     | 1.09424  | -0.37379 |          |          |   |          |         |          |   |          |          |          |   |          |          |          |   |          |         |          |   |          |          |          |   |          |          |          |   |          |          |          |   |          |         |          |   |          |          |         |   |                                                                                                                                                                                                                                                                                                                                                                                                                                                                                                                                                                                                                                                                                                                                                                     |          |         |         |          |          |         |         |          |         |          |          |          |          |         |         |          |          |          |         |          |         |         |          |          |          |          |          |          |          |          |          |          |          |          |         |          |          |          |          |          |          |          |   |          |          |          |   |          |          |          |   |          |          |          |   |          |          |         |   |          |          |         |   |          |          |         |   |          |          |         |   |          |          |          |   |          |          |         |   |          |         |         |   |          |         |          |   |          |         |         |   |          |         |         |                                                                                                                                                                                                                       |                                                                                                                                                                                                                                                                                                                                                                                                                                                                                                                                                                                                                                                                                                                                                                                                                                                                                                                                                                                                                                                                                                                                                                                                                                                                                                                                                                                                                                                                                                                                                                                                                                                                                                                                                                                                                                                                                                                                                                                                                                                                                                                                                                                                                                                                                                                                                                                                                                                                                                         |         |          |         |          |          |         |         |          |         |          |          |          |         |          |                                                                                                                                                                                                                        |                                                                                                                                                                                                                                                                                                                                                                                                                                                                                                                                                                                                                                                                                                                                                                                                                                                                                                                                                                                                                                                                                                                                                                                                                                                                                                                                                                                                                                                                                                                                                                                                                                                                                                                                                                                                                                                                                                                                                                                                                                                                                                                                                                                                                                                                                                                                                                                                                                                                                                                                                                                                                                                                                                                                                                                                |   |          |          |          |   |         |          |          |   |          |          |          |   |          |          |          |   |          |          |         |   |          |          |         |   |          |          |          |   |          |          |          |   |          |          |          |   |         |          |         |   |          |          |         |   |          |         |          |   |          |          |          |   |          |         |          |   |          |          |         |   |          |          |          |   |          |          |         |   |          |         |          |   |          |          |          |   |          |         |          |   |          |          |          |   |          |          |          |   |          |          |          |   |          |          |          |   |          |         |         |   |          |         |         |   |         |          |          |   |          |          |          |   |          |          |          |   |          |          |          |   |          |          |         |   |          |          |         |   |         |         |          |   |         |         |          |   |         |         |          |   |         |         |          |   |          |         |          |   |          |          |         |
| H                                                                                                                                                                                                                     | -2.94250                                                                                                                                                                                                                                                                                                                                                                                                                                                                                                                                                                                                                                                                                                                                                                                                                                                                                                                                                                                                                                                                                                                                                                                                                                                                                                                                                                                                                                                                                                                                                                                                                                                                                                                                                                                                                                                                                                                                                                                                                                                                                                                                                                                                                                                                                                                                                                                                                                                                                                                                                                                                                                                                                                                                                                                     | -0.37889 | 0.03055  |          |          |   |          |         |          |   |          |          |          |   |          |          |          |   |          |         |          |   |          |          |          |   |          |          |          |   |          |          |          |   |          |         |          |   |          |          |         |   |                                                                                                                                                                                                                                                                                                                                                                                                                                                                                                                                                                                                                                                                                                                                                                     |          |         |         |          |          |         |         |          |         |          |          |          |          |         |         |          |          |          |         |          |         |         |          |          |          |          |          |          |          |          |          |          |          |          |         |          |          |          |          |          |          |          |   |          |          |          |   |          |          |          |   |          |          |          |   |          |          |         |   |          |          |         |   |          |          |         |   |          |          |         |   |          |          |          |   |          |          |         |   |          |         |         |   |          |         |          |   |          |         |         |   |          |         |         |                                                                                                                                                                                                                       |                                                                                                                                                                                                                                                                                                                                                                                                                                                                                                                                                                                                                                                                                                                                                                                                                                                                                                                                                                                                                                                                                                                                                                                                                                                                                                                                                                                                                                                                                                                                                                                                                                                                                                                                                                                                                                                                                                                                                                                                                                                                                                                                                                                                                                                                                                                                                                                                                                                                                                         |         |          |         |          |          |         |         |          |         |          |          |          |         |          |                                                                                                                                                                                                                        |                                                                                                                                                                                                                                                                                                                                                                                                                                                                                                                                                                                                                                                                                                                                                                                                                                                                                                                                                                                                                                                                                                                                                                                                                                                                                                                                                                                                                                                                                                                                                                                                                                                                                                                                                                                                                                                                                                                                                                                                                                                                                                                                                                                                                                                                                                                                                                                                                                                                                                                                                                                                                                                                                                                                                                                                |   |          |          |          |   |         |          |          |   |          |          |          |   |          |          |          |   |          |          |         |   |          |          |         |   |          |          |          |   |          |          |          |   |          |          |          |   |         |          |         |   |          |          |         |   |          |         |          |   |          |          |          |   |          |         |          |   |          |          |         |   |          |          |          |   |          |          |         |   |          |         |          |   |          |          |          |   |          |         |          |   |          |          |          |   |          |          |          |   |          |          |          |   |          |          |          |   |          |         |         |   |          |         |         |   |         |          |          |   |          |          |          |   |          |          |          |   |          |          |          |   |          |          |         |   |          |          |         |   |         |         |          |   |         |         |          |   |         |         |          |   |         |         |          |   |          |         |          |   |          |          |         |
| O                                                                                                                                                                                                                     | -2.13643                                                                                                                                                                                                                                                                                                                                                                                                                                                                                                                                                                                                                                                                                                                                                                                                                                                                                                                                                                                                                                                                                                                                                                                                                                                                                                                                                                                                                                                                                                                                                                                                                                                                                                                                                                                                                                                                                                                                                                                                                                                                                                                                                                                                                                                                                                                                                                                                                                                                                                                                                                                                                                                                                                                                                                                     | 2.54818  | 0.84443  |          |          |   |          |         |          |   |          |          |          |   |          |          |          |   |          |         |          |   |          |          |          |   |          |          |          |   |          |          |          |   |          |         |          |   |          |          |         |   |                                                                                                                                                                                                                                                                                                                                                                                                                                                                                                                                                                                                                                                                                                                                                                     |          |         |         |          |          |         |         |          |         |          |          |          |          |         |         |          |          |          |         |          |         |         |          |          |          |          |          |          |          |          |          |          |          |          |         |          |          |          |          |          |          |          |   |          |          |          |   |          |          |          |   |          |          |          |   |          |          |         |   |          |          |         |   |          |          |         |   |          |          |         |   |          |          |          |   |          |          |         |   |          |         |         |   |          |         |          |   |          |         |         |   |          |         |         |                                                                                                                                                                                                                       |                                                                                                                                                                                                                                                                                                                                                                                                                                                                                                                                                                                                                                                                                                                                                                                                                                                                                                                                                                                                                                                                                                                                                                                                                                                                                                                                                                                                                                                                                                                                                                                                                                                                                                                                                                                                                                                                                                                                                                                                                                                                                                                                                                                                                                                                                                                                                                                                                                                                                                         |         |          |         |          |          |         |         |          |         |          |          |          |         |          |                                                                                                                                                                                                                        |                                                                                                                                                                                                                                                                                                                                                                                                                                                                                                                                                                                                                                                                                                                                                                                                                                                                                                                                                                                                                                                                                                                                                                                                                                                                                                                                                                                                                                                                                                                                                                                                                                                                                                                                                                                                                                                                                                                                                                                                                                                                                                                                                                                                                                                                                                                                                                                                                                                                                                                                                                                                                                                                                                                                                                                                |   |          |          |          |   |         |          |          |   |          |          |          |   |          |          |          |   |          |          |         |   |          |          |         |   |          |          |          |   |          |          |          |   |          |          |          |   |         |          |         |   |          |          |         |   |          |         |          |   |          |          |          |   |          |         |          |   |          |          |         |   |          |          |          |   |          |          |         |   |          |         |          |   |          |          |          |   |          |         |          |   |          |          |          |   |          |          |          |   |          |          |          |   |          |          |          |   |          |         |         |   |          |         |         |   |         |          |          |   |          |          |          |   |          |          |          |   |          |          |          |   |          |          |         |   |          |          |         |   |         |         |          |   |         |         |          |   |         |         |          |   |         |         |          |   |          |         |          |   |          |          |         |
| O                                                                                                                                                                                                                     | 2.76577                                                                                                                                                                                                                                                                                                                                                                                                                                                                                                                                                                                                                                                                                                                                                                                                                                                                                                                                                                                                                                                                                                                                                                                                                                                                                                                                                                                                                                                                                                                                                                                                                                                                                                                                                                                                                                                                                                                                                                                                                                                                                                                                                                                                                                                                                                                                                                                                                                                                                                                                                                                                                                                                                                                                                                                      | 2.41286  | -0.68544 |          |          |   |          |         |          |   |          |          |          |   |          |          |          |   |          |         |          |   |          |          |          |   |          |          |          |   |          |          |          |   |          |         |          |   |          |          |         |   |                                                                                                                                                                                                                                                                                                                                                                                                                                                                                                                                                                                                                                                                                                                                                                     |          |         |         |          |          |         |         |          |         |          |          |          |          |         |         |          |          |          |         |          |         |         |          |          |          |          |          |          |          |          |          |          |          |          |         |          |          |          |          |          |          |          |   |          |          |          |   |          |          |          |   |          |          |          |   |          |          |         |   |          |          |         |   |          |          |         |   |          |          |         |   |          |          |          |   |          |          |         |   |          |         |         |   |          |         |          |   |          |         |         |   |          |         |         |                                                                                                                                                                                                                       |                                                                                                                                                                                                                                                                                                                                                                                                                                                                                                                                                                                                                                                                                                                                                                                                                                                                                                                                                                                                                                                                                                                                                                                                                                                                                                                                                                                                                                                                                                                                                                                                                                                                                                                                                                                                                                                                                                                                                                                                                                                                                                                                                                                                                                                                                                                                                                                                                                                                                                         |         |          |         |          |          |         |         |          |         |          |          |          |         |          |                                                                                                                                                                                                                        |                                                                                                                                                                                                                                                                                                                                                                                                                                                                                                                                                                                                                                                                                                                                                                                                                                                                                                                                                                                                                                                                                                                                                                                                                                                                                                                                                                                                                                                                                                                                                                                                                                                                                                                                                                                                                                                                                                                                                                                                                                                                                                                                                                                                                                                                                                                                                                                                                                                                                                                                                                                                                                                                                                                                                                                                |   |          |          |          |   |         |          |          |   |          |          |          |   |          |          |          |   |          |          |         |   |          |          |         |   |          |          |          |   |          |          |          |   |          |          |          |   |         |          |         |   |          |          |         |   |          |         |          |   |          |          |          |   |          |         |          |   |          |          |         |   |          |          |          |   |          |          |         |   |          |         |          |   |          |          |          |   |          |         |          |   |          |          |          |   |          |          |          |   |          |          |          |   |          |          |          |   |          |         |         |   |          |         |         |   |         |          |          |   |          |          |          |   |          |          |          |   |          |          |          |   |          |          |         |   |          |          |         |   |         |         |          |   |         |         |          |   |         |         |          |   |         |         |          |   |          |         |          |   |          |          |         |
| H                                                                                                                                                                                                                     | 0.47676                                                                                                                                                                                                                                                                                                                                                                                                                                                                                                                                                                                                                                                                                                                                                                                                                                                                                                                                                                                                                                                                                                                                                                                                                                                                                                                                                                                                                                                                                                                                                                                                                                                                                                                                                                                                                                                                                                                                                                                                                                                                                                                                                                                                                                                                                                                                                                                                                                                                                                                                                                                                                                                                                                                                                                                      | -4.59760 | -0.57153 |          |          |   |          |         |          |   |          |          |          |   |          |          |          |   |          |         |          |   |          |          |          |   |          |          |          |   |          |          |          |   |          |         |          |   |          |          |         |   |                                                                                                                                                                                                                                                                                                                                                                                                                                                                                                                                                                                                                                                                                                                                                                     |          |         |         |          |          |         |         |          |         |          |          |          |          |         |         |          |          |          |         |          |         |         |          |          |          |          |          |          |          |          |          |          |          |          |         |          |          |          |          |          |          |          |   |          |          |          |   |          |          |          |   |          |          |          |   |          |          |         |   |          |          |         |   |          |          |         |   |          |          |         |   |          |          |          |   |          |          |         |   |          |         |         |   |          |         |          |   |          |         |         |   |          |         |         |                                                                                                                                                                                                                       |                                                                                                                                                                                                                                                                                                                                                                                                                                                                                                                                                                                                                                                                                                                                                                                                                                                                                                                                                                                                                                                                                                                                                                                                                                                                                                                                                                                                                                                                                                                                                                                                                                                                                                                                                                                                                                                                                                                                                                                                                                                                                                                                                                                                                                                                                                                                                                                                                                                                                                         |         |          |         |          |          |         |         |          |         |          |          |          |         |          |                                                                                                                                                                                                                        |                                                                                                                                                                                                                                                                                                                                                                                                                                                                                                                                                                                                                                                                                                                                                                                                                                                                                                                                                                                                                                                                                                                                                                                                                                                                                                                                                                                                                                                                                                                                                                                                                                                                                                                                                                                                                                                                                                                                                                                                                                                                                                                                                                                                                                                                                                                                                                                                                                                                                                                                                                                                                                                                                                                                                                                                |   |          |          |          |   |         |          |          |   |          |          |          |   |          |          |          |   |          |          |         |   |          |          |         |   |          |          |          |   |          |          |          |   |          |          |          |   |         |          |         |   |          |          |         |   |          |         |          |   |          |          |          |   |          |         |          |   |          |          |         |   |          |          |          |   |          |          |         |   |          |         |          |   |          |          |          |   |          |         |          |   |          |          |          |   |          |          |          |   |          |          |          |   |          |          |          |   |          |         |         |   |          |         |         |   |         |          |          |   |          |          |          |   |          |          |          |   |          |          |          |   |          |          |         |   |          |          |         |   |         |         |          |   |         |         |          |   |         |         |          |   |         |         |          |   |          |         |          |   |          |          |         |
| C                                                                                                                                                                                                                     | 0.26740                                                                                                                                                                                                                                                                                                                                                                                                                                                                                                                                                                                                                                                                                                                                                                                                                                                                                                                                                                                                                                                                                                                                                                                                                                                                                                                                                                                                                                                                                                                                                                                                                                                                                                                                                                                                                                                                                                                                                                                                                                                                                                                                                                                                                                                                                                                                                                                                                                                                                                                                                                                                                                                                                                                                                                                      | -3.54645 | -0.42518 |          |          |   |          |         |          |   |          |          |          |   |          |          |          |   |          |         |          |   |          |          |          |   |          |          |          |   |          |          |          |   |          |         |          |   |          |          |         |   |                                                                                                                                                                                                                                                                                                                                                                                                                                                                                                                                                                                                                                                                                                                                                                     |          |         |         |          |          |         |         |          |         |          |          |          |          |         |         |          |          |          |         |          |         |         |          |          |          |          |          |          |          |          |          |          |          |          |         |          |          |          |          |          |          |          |   |          |          |          |   |          |          |          |   |          |          |          |   |          |          |         |   |          |          |         |   |          |          |         |   |          |          |         |   |          |          |          |   |          |          |         |   |          |         |         |   |          |         |          |   |          |         |         |   |          |         |         |                                                                                                                                                                                                                       |                                                                                                                                                                                                                                                                                                                                                                                                                                                                                                                                                                                                                                                                                                                                                                                                                                                                                                                                                                                                                                                                                                                                                                                                                                                                                                                                                                                                                                                                                                                                                                                                                                                                                                                                                                                                                                                                                                                                                                                                                                                                                                                                                                                                                                                                                                                                                                                                                                                                                                         |         |          |         |          |          |         |         |          |         |          |          |          |         |          |                                                                                                                                                                                                                        |                                                                                                                                                                                                                                                                                                                                                                                                                                                                                                                                                                                                                                                                                                                                                                                                                                                                                                                                                                                                                                                                                                                                                                                                                                                                                                                                                                                                                                                                                                                                                                                                                                                                                                                                                                                                                                                                                                                                                                                                                                                                                                                                                                                                                                                                                                                                                                                                                                                                                                                                                                                                                                                                                                                                                                                                |   |          |          |          |   |         |          |          |   |          |          |          |   |          |          |          |   |          |          |         |   |          |          |         |   |          |          |          |   |          |          |          |   |          |          |          |   |         |          |         |   |          |          |         |   |          |         |          |   |          |          |          |   |          |         |          |   |          |          |         |   |          |          |          |   |          |          |         |   |          |         |          |   |          |          |          |   |          |         |          |   |          |          |          |   |          |          |          |   |          |          |          |   |          |          |          |   |          |         |         |   |          |         |         |   |         |          |          |   |          |          |          |   |          |          |          |   |          |          |          |   |          |          |         |   |          |          |         |   |         |         |          |   |         |         |          |   |         |         |          |   |         |         |          |   |          |         |          |   |          |          |         |
| C                                                                                                                                                                                                                     | -0.06626                                                                                                                                                                                                                                                                                                                                                                                                                                                                                                                                                                                                                                                                                                                                                                                                                                                                                                                                                                                                                                                                                                                                                                                                                                                                                                                                                                                                                                                                                                                                                                                                                                                                                                                                                                                                                                                                                                                                                                                                                                                                                                                                                                                                                                                                                                                                                                                                                                                                                                                                                                                                                                                                                                                                                                                     | -0.73490 | -0.06262 |          |          |   |          |         |          |   |          |          |          |   |          |          |          |   |          |         |          |   |          |          |          |   |          |          |          |   |          |          |          |   |          |         |          |   |          |          |         |   |                                                                                                                                                                                                                                                                                                                                                                                                                                                                                                                                                                                                                                                                                                                                                                     |          |         |         |          |          |         |         |          |         |          |          |          |          |         |         |          |          |          |         |          |         |         |          |          |          |          |          |          |          |          |          |          |          |          |         |          |          |          |          |          |          |          |   |          |          |          |   |          |          |          |   |          |          |          |   |          |          |         |   |          |          |         |   |          |          |         |   |          |          |         |   |          |          |          |   |          |          |         |   |          |         |         |   |          |         |          |   |          |         |         |   |          |         |         |                                                                                                                                                                                                                       |                                                                                                                                                                                                                                                                                                                                                                                                                                                                                                                                                                                                                                                                                                                                                                                                                                                                                                                                                                                                                                                                                                                                                                                                                                                                                                                                                                                                                                                                                                                                                                                                                                                                                                                                                                                                                                                                                                                                                                                                                                                                                                                                                                                                                                                                                                                                                                                                                                                                                                         |         |          |         |          |          |         |         |          |         |          |          |          |         |          |                                                                                                                                                                                                                        |                                                                                                                                                                                                                                                                                                                                                                                                                                                                                                                                                                                                                                                                                                                                                                                                                                                                                                                                                                                                                                                                                                                                                                                                                                                                                                                                                                                                                                                                                                                                                                                                                                                                                                                                                                                                                                                                                                                                                                                                                                                                                                                                                                                                                                                                                                                                                                                                                                                                                                                                                                                                                                                                                                                                                                                                |   |          |          |          |   |         |          |          |   |          |          |          |   |          |          |          |   |          |          |         |   |          |          |         |   |          |          |          |   |          |          |          |   |          |          |          |   |         |          |         |   |          |          |         |   |          |         |          |   |          |          |          |   |          |         |          |   |          |          |         |   |          |          |          |   |          |          |         |   |          |         |          |   |          |          |          |   |          |         |          |   |          |          |          |   |          |          |          |   |          |          |          |   |          |          |          |   |          |         |         |   |          |         |         |   |         |          |          |   |          |          |          |   |          |          |          |   |          |          |          |   |          |          |         |   |          |          |         |   |         |         |          |   |         |         |          |   |         |         |          |   |         |         |          |   |          |         |          |   |          |          |         |
| C                                                                                                                                                                                                                     | -0.04973                                                                                                                                                                                                                                                                                                                                                                                                                                                                                                                                                                                                                                                                                                                                                                                                                                                                                                                                                                                                                                                                                                                                                                                                                                                                                                                                                                                                                                                                                                                                                                                                                                                                                                                                                                                                                                                                                                                                                                                                                                                                                                                                                                                                                                                                                                                                                                                                                                                                                                                                                                                                                                                                                                                                                                                     | -2.73942 | -1.50435 |          |          |   |          |         |          |   |          |          |          |   |          |          |          |   |          |         |          |   |          |          |          |   |          |          |          |   |          |          |          |   |          |         |          |   |          |          |         |   |                                                                                                                                                                                                                                                                                                                                                                                                                                                                                                                                                                                                                                                                                                                                                                     |          |         |         |          |          |         |         |          |         |          |          |          |          |         |         |          |          |          |         |          |         |         |          |          |          |          |          |          |          |          |          |          |          |          |         |          |          |          |          |          |          |          |   |          |          |          |   |          |          |          |   |          |          |          |   |          |          |         |   |          |          |         |   |          |          |         |   |          |          |         |   |          |          |          |   |          |          |         |   |          |         |         |   |          |         |          |   |          |         |         |   |          |         |         |                                                                                                                                                                                                                       |                                                                                                                                                                                                                                                                                                                                                                                                                                                                                                                                                                                                                                                                                                                                                                                                                                                                                                                                                                                                                                                                                                                                                                                                                                                                                                                                                                                                                                                                                                                                                                                                                                                                                                                                                                                                                                                                                                                                                                                                                                                                                                                                                                                                                                                                                                                                                                                                                                                                                                         |         |          |         |          |          |         |         |          |         |          |          |          |         |          |                                                                                                                                                                                                                        |                                                                                                                                                                                                                                                                                                                                                                                                                                                                                                                                                                                                                                                                                                                                                                                                                                                                                                                                                                                                                                                                                                                                                                                                                                                                                                                                                                                                                                                                                                                                                                                                                                                                                                                                                                                                                                                                                                                                                                                                                                                                                                                                                                                                                                                                                                                                                                                                                                                                                                                                                                                                                                                                                                                                                                                                |   |          |          |          |   |         |          |          |   |          |          |          |   |          |          |          |   |          |          |         |   |          |          |         |   |          |          |          |   |          |          |          |   |          |          |          |   |         |          |         |   |          |          |         |   |          |         |          |   |          |          |          |   |          |         |          |   |          |          |         |   |          |          |          |   |          |          |         |   |          |         |          |   |          |          |          |   |          |         |          |   |          |          |          |   |          |          |          |   |          |          |          |   |          |          |          |   |          |         |         |   |          |         |         |   |         |          |          |   |          |          |          |   |          |          |          |   |          |          |          |   |          |          |         |   |          |          |         |   |         |         |          |   |         |         |          |   |         |         |          |   |         |         |          |   |          |         |          |   |          |          |         |
| C                                                                                                                                                                                                                     | 0.19652                                                                                                                                                                                                                                                                                                                                                                                                                                                                                                                                                                                                                                                                                                                                                                                                                                                                                                                                                                                                                                                                                                                                                                                                                                                                                                                                                                                                                                                                                                                                                                                                                                                                                                                                                                                                                                                                                                                                                                                                                                                                                                                                                                                                                                                                                                                                                                                                                                                                                                                                                                                                                                                                                                                                                                                      | -3.00670 | 0.84900  |          |          |   |          |         |          |   |          |          |          |   |          |          |          |   |          |         |          |   |          |          |          |   |          |          |          |   |          |          |          |   |          |         |          |   |          |          |         |   |                                                                                                                                                                                                                                                                                                                                                                                                                                                                                                                                                                                                                                                                                                                                                                     |          |         |         |          |          |         |         |          |         |          |          |          |          |         |         |          |          |          |         |          |         |         |          |          |          |          |          |          |          |          |          |          |          |          |         |          |          |          |          |          |          |          |   |          |          |          |   |          |          |          |   |          |          |          |   |          |          |         |   |          |          |         |   |          |          |         |   |          |          |         |   |          |          |          |   |          |          |         |   |          |         |         |   |          |         |          |   |          |         |         |   |          |         |         |                                                                                                                                                                                                                       |                                                                                                                                                                                                                                                                                                                                                                                                                                                                                                                                                                                                                                                                                                                                                                                                                                                                                                                                                                                                                                                                                                                                                                                                                                                                                                                                                                                                                                                                                                                                                                                                                                                                                                                                                                                                                                                                                                                                                                                                                                                                                                                                                                                                                                                                                                                                                                                                                                                                                                         |         |          |         |          |          |         |         |          |         |          |          |          |         |          |                                                                                                                                                                                                                        |                                                                                                                                                                                                                                                                                                                                                                                                                                                                                                                                                                                                                                                                                                                                                                                                                                                                                                                                                                                                                                                                                                                                                                                                                                                                                                                                                                                                                                                                                                                                                                                                                                                                                                                                                                                                                                                                                                                                                                                                                                                                                                                                                                                                                                                                                                                                                                                                                                                                                                                                                                                                                                                                                                                                                                                                |   |          |          |          |   |         |          |          |   |          |          |          |   |          |          |          |   |          |          |         |   |          |          |         |   |          |          |          |   |          |          |          |   |          |          |          |   |         |          |         |   |          |          |         |   |          |         |          |   |          |          |          |   |          |         |          |   |          |          |         |   |          |          |          |   |          |          |         |   |          |         |          |   |          |          |          |   |          |         |          |   |          |          |          |   |          |          |          |   |          |          |          |   |          |          |          |   |          |         |         |   |          |         |         |   |         |          |          |   |          |          |          |   |          |          |          |   |          |          |          |   |          |          |         |   |          |          |         |   |         |         |          |   |         |         |          |   |         |         |          |   |         |         |          |   |          |         |          |   |          |          |         |
| C                                                                                                                                                                                                                     | -0.03102                                                                                                                                                                                                                                                                                                                                                                                                                                                                                                                                                                                                                                                                                                                                                                                                                                                                                                                                                                                                                                                                                                                                                                                                                                                                                                                                                                                                                                                                                                                                                                                                                                                                                                                                                                                                                                                                                                                                                                                                                                                                                                                                                                                                                                                                                                                                                                                                                                                                                                                                                                                                                                                                                                                                                                                     | -1.64635 | 1.03756  |          |          |   |          |         |          |   |          |          |          |   |          |          |          |   |          |         |          |   |          |          |          |   |          |          |          |   |          |          |          |   |          |         |          |   |          |          |         |   |                                                                                                                                                                                                                                                                                                                                                                                                                                                                                                                                                                                                                                                                                                                                                                     |          |         |         |          |          |         |         |          |         |          |          |          |          |         |         |          |          |          |         |          |         |         |          |          |          |          |          |          |          |          |          |          |          |          |         |          |          |          |          |          |          |          |   |          |          |          |   |          |          |          |   |          |          |          |   |          |          |         |   |          |          |         |   |          |          |         |   |          |          |         |   |          |          |          |   |          |          |         |   |          |         |         |   |          |         |          |   |          |         |         |   |          |         |         |                                                                                                                                                                                                                       |                                                                                                                                                                                                                                                                                                                                                                                                                                                                                                                                                                                                                                                                                                                                                                                                                                                                                                                                                                                                                                                                                                                                                                                                                                                                                                                                                                                                                                                                                                                                                                                                                                                                                                                                                                                                                                                                                                                                                                                                                                                                                                                                                                                                                                                                                                                                                                                                                                                                                                         |         |          |         |          |          |         |         |          |         |          |          |          |         |          |                                                                                                                                                                                                                        |                                                                                                                                                                                                                                                                                                                                                                                                                                                                                                                                                                                                                                                                                                                                                                                                                                                                                                                                                                                                                                                                                                                                                                                                                                                                                                                                                                                                                                                                                                                                                                                                                                                                                                                                                                                                                                                                                                                                                                                                                                                                                                                                                                                                                                                                                                                                                                                                                                                                                                                                                                                                                                                                                                                                                                                                |   |          |          |          |   |         |          |          |   |          |          |          |   |          |          |          |   |          |          |         |   |          |          |         |   |          |          |          |   |          |          |          |   |          |          |          |   |         |          |         |   |          |          |         |   |          |         |          |   |          |          |          |   |          |         |          |   |          |          |         |   |          |          |          |   |          |          |         |   |          |         |          |   |          |          |          |   |          |         |          |   |          |          |          |   |          |          |          |   |          |          |          |   |          |          |          |   |          |         |         |   |          |         |         |   |         |          |          |   |          |          |          |   |          |          |          |   |          |          |          |   |          |          |         |   |          |          |         |   |         |         |          |   |         |         |          |   |         |         |          |   |         |         |          |   |          |         |          |   |          |          |         |
| C                                                                                                                                                                                                                     | -0.29216                                                                                                                                                                                                                                                                                                                                                                                                                                                                                                                                                                                                                                                                                                                                                                                                                                                                                                                                                                                                                                                                                                                                                                                                                                                                                                                                                                                                                                                                                                                                                                                                                                                                                                                                                                                                                                                                                                                                                                                                                                                                                                                                                                                                                                                                                                                                                                                                                                                                                                                                                                                                                                                                                                                                                                                     | -1.37714 | -1.31744 |          |          |   |          |         |          |   |          |          |          |   |          |          |          |   |          |         |          |   |          |          |          |   |          |          |          |   |          |          |          |   |          |         |          |   |          |          |         |   |                                                                                                                                                                                                                                                                                                                                                                                                                                                                                                                                                                                                                                                                                                                                                                     |          |         |         |          |          |         |         |          |         |          |          |          |          |         |         |          |          |          |         |          |         |         |          |          |          |          |          |          |          |          |          |          |          |          |         |          |          |          |          |          |          |          |   |          |          |          |   |          |          |          |   |          |          |          |   |          |          |         |   |          |          |         |   |          |          |         |   |          |          |         |   |          |          |          |   |          |          |         |   |          |         |         |   |          |         |          |   |          |         |         |   |          |         |         |                                                                                                                                                                                                                       |                                                                                                                                                                                                                                                                                                                                                                                                                                                                                                                                                                                                                                                                                                                                                                                                                                                                                                                                                                                                                                                                                                                                                                                                                                                                                                                                                                                                                                                                                                                                                                                                                                                                                                                                                                                                                                                                                                                                                                                                                                                                                                                                                                                                                                                                                                                                                                                                                                                                                                         |         |          |         |          |          |         |         |          |         |          |          |          |         |          |                                                                                                                                                                                                                        |                                                                                                                                                                                                                                                                                                                                                                                                                                                                                                                                                                                                                                                                                                                                                                                                                                                                                                                                                                                                                                                                                                                                                                                                                                                                                                                                                                                                                                                                                                                                                                                                                                                                                                                                                                                                                                                                                                                                                                                                                                                                                                                                                                                                                                                                                                                                                                                                                                                                                                                                                                                                                                                                                                                                                                                                |   |          |          |          |   |         |          |          |   |          |          |          |   |          |          |          |   |          |          |         |   |          |          |         |   |          |          |          |   |          |          |          |   |          |          |          |   |         |          |         |   |          |          |         |   |          |         |          |   |          |          |          |   |          |         |          |   |          |          |         |   |          |          |          |   |          |          |         |   |          |         |          |   |          |          |          |   |          |         |          |   |          |          |          |   |          |          |          |   |          |          |          |   |          |          |          |   |          |         |         |   |          |         |         |   |         |          |          |   |          |          |          |   |          |          |          |   |          |          |          |   |          |          |         |   |          |          |         |   |         |         |          |   |         |         |          |   |         |         |          |   |         |         |          |   |          |         |          |   |          |          |         |
| H                                                                                                                                                                                                                     | -0.14572                                                                                                                                                                                                                                                                                                                                                                                                                                                                                                                                                                                                                                                                                                                                                                                                                                                                                                                                                                                                                                                                                                                                                                                                                                                                                                                                                                                                                                                                                                                                                                                                                                                                                                                                                                                                                                                                                                                                                                                                                                                                                                                                                                                                                                                                                                                                                                                                                                                                                                                                                                                                                                                                                                                                                                                     | -3.16705 | -2.49029 |          |          |   |          |         |          |   |          |          |          |   |          |          |          |   |          |         |          |   |          |          |          |   |          |          |          |   |          |          |          |   |          |         |          |   |          |          |         |   |                                                                                                                                                                                                                                                                                                                                                                                                                                                                                                                                                                                                                                                                                                                                                                     |          |         |         |          |          |         |         |          |         |          |          |          |          |         |         |          |          |          |         |          |         |         |          |          |          |          |          |          |          |          |          |          |          |          |         |          |          |          |          |          |          |          |   |          |          |          |   |          |          |          |   |          |          |          |   |          |          |         |   |          |          |         |   |          |          |         |   |          |          |         |   |          |          |          |   |          |          |         |   |          |         |         |   |          |         |          |   |          |         |         |   |          |         |         |                                                                                                                                                                                                                       |                                                                                                                                                                                                                                                                                                                                                                                                                                                                                                                                                                                                                                                                                                                                                                                                                                                                                                                                                                                                                                                                                                                                                                                                                                                                                                                                                                                                                                                                                                                                                                                                                                                                                                                                                                                                                                                                                                                                                                                                                                                                                                                                                                                                                                                                                                                                                                                                                                                                                                         |         |          |         |          |          |         |         |          |         |          |          |          |         |          |                                                                                                                                                                                                                        |                                                                                                                                                                                                                                                                                                                                                                                                                                                                                                                                                                                                                                                                                                                                                                                                                                                                                                                                                                                                                                                                                                                                                                                                                                                                                                                                                                                                                                                                                                                                                                                                                                                                                                                                                                                                                                                                                                                                                                                                                                                                                                                                                                                                                                                                                                                                                                                                                                                                                                                                                                                                                                                                                                                                                                                                |   |          |          |          |   |         |          |          |   |          |          |          |   |          |          |          |   |          |          |         |   |          |          |         |   |          |          |          |   |          |          |          |   |          |          |          |   |         |          |         |   |          |          |         |   |          |         |          |   |          |          |          |   |          |         |          |   |          |          |         |   |          |          |          |   |          |          |         |   |          |         |          |   |          |          |          |   |          |         |          |   |          |          |          |   |          |          |          |   |          |          |          |   |          |          |          |   |          |         |         |   |          |         |         |   |         |          |          |   |          |          |          |   |          |          |          |   |          |          |          |   |          |          |         |   |          |          |         |   |         |         |          |   |         |         |          |   |         |         |          |   |         |         |          |   |          |         |          |   |          |          |         |
| H                                                                                                                                                                                                                     | 0.26580                                                                                                                                                                                                                                                                                                                                                                                                                                                                                                                                                                                                                                                                                                                                                                                                                                                                                                                                                                                                                                                                                                                                                                                                                                                                                                                                                                                                                                                                                                                                                                                                                                                                                                                                                                                                                                                                                                                                                                                                                                                                                                                                                                                                                                                                                                                                                                                                                                                                                                                                                                                                                                                                                                                                                                                      | -3.63333 | 1.72681  |          |          |   |          |         |          |   |          |          |          |   |          |          |          |   |          |         |          |   |          |          |          |   |          |          |          |   |          |          |          |   |          |         |          |   |          |          |         |   |                                                                                                                                                                                                                                                                                                                                                                                                                                                                                                                                                                                                                                                                                                                                                                     |          |         |         |          |          |         |         |          |         |          |          |          |          |         |         |          |          |          |         |          |         |         |          |          |          |          |          |          |          |          |          |          |          |          |         |          |          |          |          |          |          |          |   |          |          |          |   |          |          |          |   |          |          |          |   |          |          |         |   |          |          |         |   |          |          |         |   |          |          |         |   |          |          |          |   |          |          |         |   |          |         |         |   |          |         |          |   |          |         |         |   |          |         |         |                                                                                                                                                                                                                       |                                                                                                                                                                                                                                                                                                                                                                                                                                                                                                                                                                                                                                                                                                                                                                                                                                                                                                                                                                                                                                                                                                                                                                                                                                                                                                                                                                                                                                                                                                                                                                                                                                                                                                                                                                                                                                                                                                                                                                                                                                                                                                                                                                                                                                                                                                                                                                                                                                                                                                         |         |          |         |          |          |         |         |          |         |          |          |          |         |          |                                                                                                                                                                                                                        |                                                                                                                                                                                                                                                                                                                                                                                                                                                                                                                                                                                                                                                                                                                                                                                                                                                                                                                                                                                                                                                                                                                                                                                                                                                                                                                                                                                                                                                                                                                                                                                                                                                                                                                                                                                                                                                                                                                                                                                                                                                                                                                                                                                                                                                                                                                                                                                                                                                                                                                                                                                                                                                                                                                                                                                                |   |          |          |          |   |         |          |          |   |          |          |          |   |          |          |          |   |          |          |         |   |          |          |         |   |          |          |          |   |          |          |          |   |          |          |          |   |         |          |         |   |          |          |         |   |          |         |          |   |          |          |          |   |          |         |          |   |          |          |         |   |          |          |          |   |          |          |         |   |          |         |          |   |          |          |          |   |          |         |          |   |          |          |          |   |          |          |          |   |          |          |          |   |          |          |          |   |          |         |         |   |          |         |         |   |         |          |          |   |          |          |          |   |          |          |          |   |          |          |          |   |          |          |         |   |          |          |         |   |         |         |          |   |         |         |          |   |         |         |          |   |         |         |          |   |          |         |          |   |          |          |         |
| C                                                                                                                                                                                                                     | 0.04721                                                                                                                                                                                                                                                                                                                                                                                                                                                                                                                                                                                                                                                                                                                                                                                                                                                                                                                                                                                                                                                                                                                                                                                                                                                                                                                                                                                                                                                                                                                                                                                                                                                                                                                                                                                                                                                                                                                                                                                                                                                                                                                                                                                                                                                                                                                                                                                                                                                                                                                                                                                                                                                                                                                                                                                      | 0.75412  | 0.06353  |          |          |   |          |         |          |   |          |          |          |   |          |          |          |   |          |         |          |   |          |          |          |   |          |          |          |   |          |          |          |   |          |         |          |   |          |          |         |   |                                                                                                                                                                                                                                                                                                                                                                                                                                                                                                                                                                                                                                                                                                                                                                     |          |         |         |          |          |         |         |          |         |          |          |          |          |         |         |          |          |          |         |          |         |         |          |          |          |          |          |          |          |          |          |          |          |          |         |          |          |          |          |          |          |          |   |          |          |          |   |          |          |          |   |          |          |          |   |          |          |         |   |          |          |         |   |          |          |         |   |          |          |         |   |          |          |          |   |          |          |         |   |          |         |         |   |          |         |          |   |          |         |         |   |          |         |         |                                                                                                                                                                                                                       |                                                                                                                                                                                                                                                                                                                                                                                                                                                                                                                                                                                                                                                                                                                                                                                                                                                                                                                                                                                                                                                                                                                                                                                                                                                                                                                                                                                                                                                                                                                                                                                                                                                                                                                                                                                                                                                                                                                                                                                                                                                                                                                                                                                                                                                                                                                                                                                                                                                                                                         |         |          |         |          |          |         |         |          |         |          |          |          |         |          |                                                                                                                                                                                                                        |                                                                                                                                                                                                                                                                                                                                                                                                                                                                                                                                                                                                                                                                                                                                                                                                                                                                                                                                                                                                                                                                                                                                                                                                                                                                                                                                                                                                                                                                                                                                                                                                                                                                                                                                                                                                                                                                                                                                                                                                                                                                                                                                                                                                                                                                                                                                                                                                                                                                                                                                                                                                                                                                                                                                                                                                |   |          |          |          |   |         |          |          |   |          |          |          |   |          |          |          |   |          |          |         |   |          |          |         |   |          |          |          |   |          |          |          |   |          |          |          |   |         |          |         |   |          |          |         |   |          |         |          |   |          |          |          |   |          |         |          |   |          |          |         |   |          |          |          |   |          |          |         |   |          |         |          |   |          |          |          |   |          |         |          |   |          |          |          |   |          |          |          |   |          |          |          |   |          |          |          |   |          |         |         |   |          |         |         |   |         |          |          |   |          |          |          |   |          |          |          |   |          |          |          |   |          |          |         |   |          |          |         |   |         |         |          |   |         |         |          |   |         |         |          |   |         |         |          |   |          |         |          |   |          |          |         |
| C                                                                                                                                                                                                                     | -0.28678                                                                                                                                                                                                                                                                                                                                                                                                                                                                                                                                                                                                                                                                                                                                                                                                                                                                                                                                                                                                                                                                                                                                                                                                                                                                                                                                                                                                                                                                                                                                                                                                                                                                                                                                                                                                                                                                                                                                                                                                                                                                                                                                                                                                                                                                                                                                                                                                                                                                                                                                                                                                                                                                                                                                                                                     | 3.56552  | 0.42689  |          |          |   |          |         |          |   |          |          |          |   |          |          |          |   |          |         |          |   |          |          |          |   |          |          |          |   |          |          |          |   |          |         |          |   |          |          |         |   |                                                                                                                                                                                                                                                                                                                                                                                                                                                                                                                                                                                                                                                                                                                                                                     |          |         |         |          |          |         |         |          |         |          |          |          |          |         |         |          |          |          |         |          |         |         |          |          |          |          |          |          |          |          |          |          |          |          |         |          |          |          |          |          |          |          |   |          |          |          |   |          |          |          |   |          |          |          |   |          |          |         |   |          |          |         |   |          |          |         |   |          |          |         |   |          |          |          |   |          |          |         |   |          |         |         |   |          |         |          |   |          |         |         |   |          |         |         |                                                                                                                                                                                                                       |                                                                                                                                                                                                                                                                                                                                                                                                                                                                                                                                                                                                                                                                                                                                                                                                                                                                                                                                                                                                                                                                                                                                                                                                                                                                                                                                                                                                                                                                                                                                                                                                                                                                                                                                                                                                                                                                                                                                                                                                                                                                                                                                                                                                                                                                                                                                                                                                                                                                                                         |         |          |         |          |          |         |         |          |         |          |          |          |         |          |                                                                                                                                                                                                                        |                                                                                                                                                                                                                                                                                                                                                                                                                                                                                                                                                                                                                                                                                                                                                                                                                                                                                                                                                                                                                                                                                                                                                                                                                                                                                                                                                                                                                                                                                                                                                                                                                                                                                                                                                                                                                                                                                                                                                                                                                                                                                                                                                                                                                                                                                                                                                                                                                                                                                                                                                                                                                                                                                                                                                                                                |   |          |          |          |   |         |          |          |   |          |          |          |   |          |          |          |   |          |          |         |   |          |          |         |   |          |          |          |   |          |          |          |   |          |          |          |   |         |          |         |   |          |          |         |   |          |         |          |   |          |          |          |   |          |         |          |   |          |          |         |   |          |          |          |   |          |          |         |   |          |         |          |   |          |          |          |   |          |         |          |   |          |          |          |   |          |          |          |   |          |          |          |   |          |          |          |   |          |         |         |   |          |         |         |   |         |          |          |   |          |          |          |   |          |          |          |   |          |          |          |   |          |          |         |   |          |          |         |   |         |         |          |   |         |         |          |   |         |         |          |   |         |         |          |   |          |         |          |   |          |          |         |
| C                                                                                                                                                                                                                     | 0.27363                                                                                                                                                                                                                                                                                                                                                                                                                                                                                                                                                                                                                                                                                                                                                                                                                                                                                                                                                                                                                                                                                                                                                                                                                                                                                                                                                                                                                                                                                                                                                                                                                                                                                                                                                                                                                                                                                                                                                                                                                                                                                                                                                                                                                                                                                                                                                                                                                                                                                                                                                                                                                                                                                                                                                                                      | 1.39612  | 1.31838  |          |          |   |          |         |          |   |          |          |          |   |          |          |          |   |          |         |          |   |          |          |          |   |          |          |          |   |          |          |          |   |          |         |          |   |          |          |         |   |                                                                                                                                                                                                                                                                                                                                                                                                                                                                                                                                                                                                                                                                                                                                                                     |          |         |         |          |          |         |         |          |         |          |          |          |          |         |         |          |          |          |         |          |         |         |          |          |          |          |          |          |          |          |          |          |          |          |         |          |          |          |          |          |          |          |   |          |          |          |   |          |          |          |   |          |          |          |   |          |          |         |   |          |          |         |   |          |          |         |   |          |          |         |   |          |          |          |   |          |          |         |   |          |         |         |   |          |         |          |   |          |         |         |   |          |         |         |                                                                                                                                                                                                                       |                                                                                                                                                                                                                                                                                                                                                                                                                                                                                                                                                                                                                                                                                                                                                                                                                                                                                                                                                                                                                                                                                                                                                                                                                                                                                                                                                                                                                                                                                                                                                                                                                                                                                                                                                                                                                                                                                                                                                                                                                                                                                                                                                                                                                                                                                                                                                                                                                                                                                                         |         |          |         |          |          |         |         |          |         |          |          |          |         |          |                                                                                                                                                                                                                        |                                                                                                                                                                                                                                                                                                                                                                                                                                                                                                                                                                                                                                                                                                                                                                                                                                                                                                                                                                                                                                                                                                                                                                                                                                                                                                                                                                                                                                                                                                                                                                                                                                                                                                                                                                                                                                                                                                                                                                                                                                                                                                                                                                                                                                                                                                                                                                                                                                                                                                                                                                                                                                                                                                                                                                                                |   |          |          |          |   |         |          |          |   |          |          |          |   |          |          |          |   |          |          |         |   |          |          |         |   |          |          |          |   |          |          |          |   |          |          |          |   |         |          |         |   |          |          |         |   |          |         |          |   |          |          |          |   |          |         |          |   |          |          |         |   |          |          |          |   |          |          |         |   |          |         |          |   |          |          |          |   |          |         |          |   |          |          |          |   |          |          |          |   |          |          |          |   |          |          |          |   |          |         |         |   |          |         |         |   |         |          |          |   |          |          |          |   |          |          |          |   |          |          |          |   |          |          |         |   |          |          |         |   |         |         |          |   |         |         |          |   |         |         |          |   |         |         |          |   |          |         |          |   |          |          |         |
| C                                                                                                                                                                                                                     | 0.01133                                                                                                                                                                                                                                                                                                                                                                                                                                                                                                                                                                                                                                                                                                                                                                                                                                                                                                                                                                                                                                                                                                                                                                                                                                                                                                                                                                                                                                                                                                                                                                                                                                                                                                                                                                                                                                                                                                                                                                                                                                                                                                                                                                                                                                                                                                                                                                                                                                                                                                                                                                                                                                                                                                                                                                                      | 1.66581  | -1.03644 |          |          |   |          |         |          |   |          |          |          |   |          |          |          |   |          |         |          |   |          |          |          |   |          |          |          |   |          |          |          |   |          |         |          |   |          |          |         |   |                                                                                                                                                                                                                                                                                                                                                                                                                                                                                                                                                                                                                                                                                                                                                                     |          |         |         |          |          |         |         |          |         |          |          |          |          |         |         |          |          |          |         |          |         |         |          |          |          |          |          |          |          |          |          |          |          |          |         |          |          |          |          |          |          |          |   |          |          |          |   |          |          |          |   |          |          |          |   |          |          |         |   |          |          |         |   |          |          |         |   |          |          |         |   |          |          |          |   |          |          |         |   |          |         |         |   |          |         |          |   |          |         |         |   |          |         |         |                                                                                                                                                                                                                       |                                                                                                                                                                                                                                                                                                                                                                                                                                                                                                                                                                                                                                                                                                                                                                                                                                                                                                                                                                                                                                                                                                                                                                                                                                                                                                                                                                                                                                                                                                                                                                                                                                                                                                                                                                                                                                                                                                                                                                                                                                                                                                                                                                                                                                                                                                                                                                                                                                                                                                         |         |          |         |          |          |         |         |          |         |          |          |          |         |          |                                                                                                                                                                                                                        |                                                                                                                                                                                                                                                                                                                                                                                                                                                                                                                                                                                                                                                                                                                                                                                                                                                                                                                                                                                                                                                                                                                                                                                                                                                                                                                                                                                                                                                                                                                                                                                                                                                                                                                                                                                                                                                                                                                                                                                                                                                                                                                                                                                                                                                                                                                                                                                                                                                                                                                                                                                                                                                                                                                                                                                                |   |          |          |          |   |         |          |          |   |          |          |          |   |          |          |          |   |          |          |         |   |          |          |         |   |          |          |          |   |          |          |          |   |          |          |          |   |         |          |         |   |          |          |         |   |          |         |          |   |          |          |          |   |          |         |          |   |          |          |         |   |          |          |          |   |          |          |         |   |          |         |          |   |          |          |          |   |          |         |          |   |          |          |          |   |          |          |          |   |          |          |          |   |          |          |          |   |          |         |         |   |          |         |         |   |         |          |          |   |          |          |          |   |          |          |          |   |          |          |          |   |          |          |         |   |          |          |         |   |         |         |          |   |         |         |          |   |         |         |          |   |         |         |          |   |          |         |          |   |          |          |         |
| C                                                                                                                                                                                                                     | -0.21638                                                                                                                                                                                                                                                                                                                                                                                                                                                                                                                                                                                                                                                                                                                                                                                                                                                                                                                                                                                                                                                                                                                                                                                                                                                                                                                                                                                                                                                                                                                                                                                                                                                                                                                                                                                                                                                                                                                                                                                                                                                                                                                                                                                                                                                                                                                                                                                                                                                                                                                                                                                                                                                                                                                                                                                     | 3.02607  | -0.84745 |          |          |   |          |         |          |   |          |          |          |   |          |          |          |   |          |         |          |   |          |          |          |   |          |          |          |   |          |          |          |   |          |         |          |   |          |          |         |   |                                                                                                                                                                                                                                                                                                                                                                                                                                                                                                                                                                                                                                                                                                                                                                     |          |         |         |          |          |         |         |          |         |          |          |          |          |         |         |          |          |          |         |          |         |         |          |          |          |          |          |          |          |          |          |          |          |          |         |          |          |          |          |          |          |          |   |          |          |          |   |          |          |          |   |          |          |          |   |          |          |         |   |          |          |         |   |          |          |         |   |          |          |         |   |          |          |          |   |          |          |         |   |          |         |         |   |          |         |          |   |          |         |         |   |          |         |         |                                                                                                                                                                                                                       |                                                                                                                                                                                                                                                                                                                                                                                                                                                                                                                                                                                                                                                                                                                                                                                                                                                                                                                                                                                                                                                                                                                                                                                                                                                                                                                                                                                                                                                                                                                                                                                                                                                                                                                                                                                                                                                                                                                                                                                                                                                                                                                                                                                                                                                                                                                                                                                                                                                                                                         |         |          |         |          |          |         |         |          |         |          |          |          |         |          |                                                                                                                                                                                                                        |                                                                                                                                                                                                                                                                                                                                                                                                                                                                                                                                                                                                                                                                                                                                                                                                                                                                                                                                                                                                                                                                                                                                                                                                                                                                                                                                                                                                                                                                                                                                                                                                                                                                                                                                                                                                                                                                                                                                                                                                                                                                                                                                                                                                                                                                                                                                                                                                                                                                                                                                                                                                                                                                                                                                                                                                |   |          |          |          |   |         |          |          |   |          |          |          |   |          |          |          |   |          |          |         |   |          |          |         |   |          |          |          |   |          |          |          |   |          |          |          |   |         |          |         |   |          |          |         |   |          |         |          |   |          |          |          |   |          |         |          |   |          |          |         |   |          |          |          |   |          |          |         |   |          |         |          |   |          |          |          |   |          |         |          |   |          |          |          |   |          |          |          |   |          |          |          |   |          |          |          |   |          |         |         |   |          |         |         |   |         |          |          |   |          |          |          |   |          |          |          |   |          |          |          |   |          |          |         |   |          |          |         |   |         |         |          |   |         |         |          |   |         |         |          |   |         |         |          |   |          |         |          |   |          |          |         |
| C                                                                                                                                                                                                                     | 0.03105                                                                                                                                                                                                                                                                                                                                                                                                                                                                                                                                                                                                                                                                                                                                                                                                                                                                                                                                                                                                                                                                                                                                                                                                                                                                                                                                                                                                                                                                                                                                                                                                                                                                                                                                                                                                                                                                                                                                                                                                                                                                                                                                                                                                                                                                                                                                                                                                                                                                                                                                                                                                                                                                                                                                                                                      | 2.75831  | 1.50573  |          |          |   |          |         |          |   |          |          |          |   |          |          |          |   |          |         |          |   |          |          |          |   |          |          |          |   |          |          |          |   |          |         |          |   |          |          |         |   |                                                                                                                                                                                                                                                                                                                                                                                                                                                                                                                                                                                                                                                                                                                                                                     |          |         |         |          |          |         |         |          |         |          |          |          |          |         |         |          |          |          |         |          |         |         |          |          |          |          |          |          |          |          |          |          |          |          |         |          |          |          |          |          |          |          |   |          |          |          |   |          |          |          |   |          |          |          |   |          |          |         |   |          |          |         |   |          |          |         |   |          |          |         |   |          |          |          |   |          |          |         |   |          |         |         |   |          |         |          |   |          |         |         |   |          |         |         |                                                                                                                                                                                                                       |                                                                                                                                                                                                                                                                                                                                                                                                                                                                                                                                                                                                                                                                                                                                                                                                                                                                                                                                                                                                                                                                                                                                                                                                                                                                                                                                                                                                                                                                                                                                                                                                                                                                                                                                                                                                                                                                                                                                                                                                                                                                                                                                                                                                                                                                                                                                                                                                                                                                                                         |         |          |         |          |          |         |         |          |         |          |          |          |         |          |                                                                                                                                                                                                                        |                                                                                                                                                                                                                                                                                                                                                                                                                                                                                                                                                                                                                                                                                                                                                                                                                                                                                                                                                                                                                                                                                                                                                                                                                                                                                                                                                                                                                                                                                                                                                                                                                                                                                                                                                                                                                                                                                                                                                                                                                                                                                                                                                                                                                                                                                                                                                                                                                                                                                                                                                                                                                                                                                                                                                                                                |   |          |          |          |   |         |          |          |   |          |          |          |   |          |          |          |   |          |          |         |   |          |          |         |   |          |          |          |   |          |          |          |   |          |          |          |   |         |          |         |   |          |          |         |   |          |         |          |   |          |          |          |   |          |         |          |   |          |          |         |   |          |          |          |   |          |          |         |   |          |         |          |   |          |          |          |   |          |         |          |   |          |          |          |   |          |          |          |   |          |          |          |   |          |          |          |   |          |         |         |   |          |         |         |   |         |          |          |   |          |          |          |   |          |          |          |   |          |          |          |   |          |          |         |   |          |          |         |   |         |         |          |   |         |         |          |   |         |         |          |   |         |         |          |   |          |         |          |   |          |          |         |
| H                                                                                                                                                                                                                     | -0.28617                                                                                                                                                                                                                                                                                                                                                                                                                                                                                                                                                                                                                                                                                                                                                                                                                                                                                                                                                                                                                                                                                                                                                                                                                                                                                                                                                                                                                                                                                                                                                                                                                                                                                                                                                                                                                                                                                                                                                                                                                                                                                                                                                                                                                                                                                                                                                                                                                                                                                                                                                                                                                                                                                                                                                                                     | 3.65290  | -1.72508 |          |          |   |          |         |          |   |          |          |          |   |          |          |          |   |          |         |          |   |          |          |          |   |          |          |          |   |          |          |          |   |          |         |          |   |          |          |         |   |                                                                                                                                                                                                                                                                                                                                                                                                                                                                                                                                                                                                                                                                                                                                                                     |          |         |         |          |          |         |         |          |         |          |          |          |          |         |         |          |          |          |         |          |         |         |          |          |          |          |          |          |          |          |          |          |          |          |         |          |          |          |          |          |          |          |   |          |          |          |   |          |          |          |   |          |          |          |   |          |          |         |   |          |          |         |   |          |          |         |   |          |          |         |   |          |          |          |   |          |          |         |   |          |         |         |   |          |         |          |   |          |         |         |   |          |         |         |                                                                                                                                                                                                                       |                                                                                                                                                                                                                                                                                                                                                                                                                                                                                                                                                                                                                                                                                                                                                                                                                                                                                                                                                                                                                                                                                                                                                                                                                                                                                                                                                                                                                                                                                                                                                                                                                                                                                                                                                                                                                                                                                                                                                                                                                                                                                                                                                                                                                                                                                                                                                                                                                                                                                                         |         |          |         |          |          |         |         |          |         |          |          |          |         |          |                                                                                                                                                                                                                        |                                                                                                                                                                                                                                                                                                                                                                                                                                                                                                                                                                                                                                                                                                                                                                                                                                                                                                                                                                                                                                                                                                                                                                                                                                                                                                                                                                                                                                                                                                                                                                                                                                                                                                                                                                                                                                                                                                                                                                                                                                                                                                                                                                                                                                                                                                                                                                                                                                                                                                                                                                                                                                                                                                                                                                                                |   |          |          |          |   |         |          |          |   |          |          |          |   |          |          |          |   |          |          |         |   |          |          |         |   |          |          |          |   |          |          |          |   |          |          |          |   |         |          |         |   |          |          |         |   |          |         |          |   |          |          |          |   |          |         |          |   |          |          |         |   |          |          |          |   |          |          |         |   |          |         |          |   |          |          |          |   |          |         |          |   |          |          |          |   |          |          |          |   |          |          |          |   |          |          |          |   |          |         |         |   |          |         |         |   |         |          |          |   |          |          |          |   |          |          |          |   |          |          |          |   |          |          |         |   |          |          |         |   |         |         |          |   |         |         |          |   |         |         |          |   |         |         |          |   |          |         |          |   |          |          |         |
| H                                                                                                                                                                                                                     | 0.12741                                                                                                                                                                                                                                                                                                                                                                                                                                                                                                                                                                                                                                                                                                                                                                                                                                                                                                                                                                                                                                                                                                                                                                                                                                                                                                                                                                                                                                                                                                                                                                                                                                                                                                                                                                                                                                                                                                                                                                                                                                                                                                                                                                                                                                                                                                                                                                                                                                                                                                                                                                                                                                                                                                                                                                                      | 3.18573  | 2.49172  |          |          |   |          |         |          |   |          |          |          |   |          |          |          |   |          |         |          |   |          |          |          |   |          |          |          |   |          |          |          |   |          |         |          |   |          |          |         |   |                                                                                                                                                                                                                                                                                                                                                                                                                                                                                                                                                                                                                                                                                                                                                                     |          |         |         |          |          |         |         |          |         |          |          |          |          |         |         |          |          |          |         |          |         |         |          |          |          |          |          |          |          |          |          |          |          |          |         |          |          |          |          |          |          |          |   |          |          |          |   |          |          |          |   |          |          |          |   |          |          |         |   |          |          |         |   |          |          |         |   |          |          |         |   |          |          |          |   |          |          |         |   |          |         |         |   |          |         |          |   |          |         |         |   |          |         |         |                                                                                                                                                                                                                       |                                                                                                                                                                                                                                                                                                                                                                                                                                                                                                                                                                                                                                                                                                                                                                                                                                                                                                                                                                                                                                                                                                                                                                                                                                                                                                                                                                                                                                                                                                                                                                                                                                                                                                                                                                                                                                                                                                                                                                                                                                                                                                                                                                                                                                                                                                                                                                                                                                                                                                         |         |          |         |          |          |         |         |          |         |          |          |          |         |          |                                                                                                                                                                                                                        |                                                                                                                                                                                                                                                                                                                                                                                                                                                                                                                                                                                                                                                                                                                                                                                                                                                                                                                                                                                                                                                                                                                                                                                                                                                                                                                                                                                                                                                                                                                                                                                                                                                                                                                                                                                                                                                                                                                                                                                                                                                                                                                                                                                                                                                                                                                                                                                                                                                                                                                                                                                                                                                                                                                                                                                                |   |          |          |          |   |         |          |          |   |          |          |          |   |          |          |          |   |          |          |         |   |          |          |         |   |          |          |          |   |          |          |          |   |          |          |          |   |         |          |         |   |          |          |         |   |          |         |          |   |          |          |          |   |          |         |          |   |          |          |         |   |          |          |          |   |          |          |         |   |          |         |          |   |          |          |          |   |          |         |          |   |          |          |          |   |          |          |          |   |          |          |          |   |          |          |          |   |          |         |         |   |          |         |         |   |         |          |          |   |          |          |          |   |          |          |          |   |          |          |          |   |          |          |         |   |          |          |         |   |         |         |          |   |         |         |          |   |         |         |          |   |         |         |          |   |          |         |          |   |          |          |         |
| H                                                                                                                                                                                                                     | -0.49629                                                                                                                                                                                                                                                                                                                                                                                                                                                                                                                                                                                                                                                                                                                                                                                                                                                                                                                                                                                                                                                                                                                                                                                                                                                                                                                                                                                                                                                                                                                                                                                                                                                                                                                                                                                                                                                                                                                                                                                                                                                                                                                                                                                                                                                                                                                                                                                                                                                                                                                                                                                                                                                                                                                                                                                     | 4.61659  | 0.57358  |          |          |   |          |         |          |   |          |          |          |   |          |          |          |   |          |         |          |   |          |          |          |   |          |          |          |   |          |          |          |   |          |         |          |   |          |          |         |   |                                                                                                                                                                                                                                                                                                                                                                                                                                                                                                                                                                                                                                                                                                                                                                     |          |         |         |          |          |         |         |          |         |          |          |          |          |         |         |          |          |          |         |          |         |         |          |          |          |          |          |          |          |          |          |          |          |          |         |          |          |          |          |          |          |          |   |          |          |          |   |          |          |          |   |          |          |          |   |          |          |         |   |          |          |         |   |          |          |         |   |          |          |         |   |          |          |          |   |          |          |         |   |          |         |         |   |          |         |          |   |          |         |         |   |          |         |         |                                                                                                                                                                                                                       |                                                                                                                                                                                                                                                                                                                                                                                                                                                                                                                                                                                                                                                                                                                                                                                                                                                                                                                                                                                                                                                                                                                                                                                                                                                                                                                                                                                                                                                                                                                                                                                                                                                                                                                                                                                                                                                                                                                                                                                                                                                                                                                                                                                                                                                                                                                                                                                                                                                                                                         |         |          |         |          |          |         |         |          |         |          |          |          |         |          |                                                                                                                                                                                                                        |                                                                                                                                                                                                                                                                                                                                                                                                                                                                                                                                                                                                                                                                                                                                                                                                                                                                                                                                                                                                                                                                                                                                                                                                                                                                                                                                                                                                                                                                                                                                                                                                                                                                                                                                                                                                                                                                                                                                                                                                                                                                                                                                                                                                                                                                                                                                                                                                                                                                                                                                                                                                                                                                                                                                                                                                |   |          |          |          |   |         |          |          |   |          |          |          |   |          |          |          |   |          |          |         |   |          |          |         |   |          |          |          |   |          |          |          |   |          |          |          |   |         |          |         |   |          |          |         |   |          |         |          |   |          |          |          |   |          |         |          |   |          |          |         |   |          |          |          |   |          |          |         |   |          |         |          |   |          |          |          |   |          |         |          |   |          |          |          |   |          |          |          |   |          |          |          |   |          |          |          |   |          |         |         |   |          |         |         |   |         |          |          |   |          |          |          |   |          |          |          |   |          |          |          |   |          |          |         |   |          |          |         |   |         |         |          |   |         |         |          |   |         |         |          |   |         |         |          |   |          |         |          |   |          |          |         |
| O                                                                                                                                                                                                                     | -0.82459                                                                                                                                                                                                                                                                                                                                                                                                                                                                                                                                                                                                                                                                                                                                                                                                                                                                                                                                                                                                                                                                                                                                                                                                                                                                                                                                                                                                                                                                                                                                                                                                                                                                                                                                                                                                                                                                                                                                                                                                                                                                                                                                                                                                                                                                                                                                                                                                                                                                                                                                                                                                                                                                                                                                                                                     | -0.62520 | -2.30569 |          |          |   |          |         |          |   |          |          |          |   |          |          |          |   |          |         |          |   |          |          |          |   |          |          |          |   |          |          |          |   |          |         |          |   |          |          |         |   |                                                                                                                                                                                                                                                                                                                                                                                                                                                                                                                                                                                                                                                                                                                                                                     |          |         |         |          |          |         |         |          |         |          |          |          |          |         |         |          |          |          |         |          |         |         |          |          |          |          |          |          |          |          |          |          |          |          |         |          |          |          |          |          |          |          |   |          |          |          |   |          |          |          |   |          |          |          |   |          |          |         |   |          |          |         |   |          |          |         |   |          |          |         |   |          |          |          |   |          |          |         |   |          |         |         |   |          |         |          |   |          |         |         |   |          |         |         |                                                                                                                                                                                                                       |                                                                                                                                                                                                                                                                                                                                                                                                                                                                                                                                                                                                                                                                                                                                                                                                                                                                                                                                                                                                                                                                                                                                                                                                                                                                                                                                                                                                                                                                                                                                                                                                                                                                                                                                                                                                                                                                                                                                                                                                                                                                                                                                                                                                                                                                                                                                                                                                                                                                                                         |         |          |         |          |          |         |         |          |         |          |          |          |         |          |                                                                                                                                                                                                                        |                                                                                                                                                                                                                                                                                                                                                                                                                                                                                                                                                                                                                                                                                                                                                                                                                                                                                                                                                                                                                                                                                                                                                                                                                                                                                                                                                                                                                                                                                                                                                                                                                                                                                                                                                                                                                                                                                                                                                                                                                                                                                                                                                                                                                                                                                                                                                                                                                                                                                                                                                                                                                                                                                                                                                                                                |   |          |          |          |   |         |          |          |   |          |          |          |   |          |          |          |   |          |          |         |   |          |          |         |   |          |          |          |   |          |          |          |   |          |          |          |   |         |          |         |   |          |          |         |   |          |         |          |   |          |          |          |   |          |         |          |   |          |          |         |   |          |          |          |   |          |          |         |   |          |         |          |   |          |          |          |   |          |         |          |   |          |          |          |   |          |          |          |   |          |          |          |   |          |          |          |   |          |         |         |   |          |         |         |   |         |          |          |   |          |          |          |   |          |          |          |   |          |          |          |   |          |          |         |   |          |          |         |   |         |         |          |   |         |         |          |   |         |         |          |   |         |         |          |   |          |         |          |   |          |          |         |
| O                                                                                                                                                                                                                     | 0.80662                                                                                                                                                                                                                                                                                                                                                                                                                                                                                                                                                                                                                                                                                                                                                                                                                                                                                                                                                                                                                                                                                                                                                                                                                                                                                                                                                                                                                                                                                                                                                                                                                                                                                                                                                                                                                                                                                                                                                                                                                                                                                                                                                                                                                                                                                                                                                                                                                                                                                                                                                                                                                                                                                                                                                                                      | 0.64402  | 2.30622  |          |          |   |          |         |          |   |          |          |          |   |          |          |          |   |          |         |          |   |          |          |          |   |          |          |          |   |          |          |          |   |          |         |          |   |          |          |         |   |                                                                                                                                                                                                                                                                                                                                                                                                                                                                                                                                                                                                                                                                                                                                                                     |          |         |         |          |          |         |         |          |         |          |          |          |          |         |         |          |          |          |         |          |         |         |          |          |          |          |          |          |          |          |          |          |          |          |         |          |          |          |          |          |          |          |   |          |          |          |   |          |          |          |   |          |          |          |   |          |          |         |   |          |          |         |   |          |          |         |   |          |          |         |   |          |          |          |   |          |          |         |   |          |         |         |   |          |         |          |   |          |         |         |   |          |         |         |                                                                                                                                                                                                                       |                                                                                                                                                                                                                                                                                                                                                                                                                                                                                                                                                                                                                                                                                                                                                                                                                                                                                                                                                                                                                                                                                                                                                                                                                                                                                                                                                                                                                                                                                                                                                                                                                                                                                                                                                                                                                                                                                                                                                                                                                                                                                                                                                                                                                                                                                                                                                                                                                                                                                                         |         |          |         |          |          |         |         |          |         |          |          |          |         |          |                                                                                                                                                                                                                        |                                                                                                                                                                                                                                                                                                                                                                                                                                                                                                                                                                                                                                                                                                                                                                                                                                                                                                                                                                                                                                                                                                                                                                                                                                                                                                                                                                                                                                                                                                                                                                                                                                                                                                                                                                                                                                                                                                                                                                                                                                                                                                                                                                                                                                                                                                                                                                                                                                                                                                                                                                                                                                                                                                                                                                                                |   |          |          |          |   |         |          |          |   |          |          |          |   |          |          |          |   |          |          |         |   |          |          |         |   |          |          |          |   |          |          |          |   |          |          |          |   |         |          |         |   |          |          |         |   |          |         |          |   |          |          |          |   |          |         |          |   |          |          |         |   |          |          |          |   |          |          |         |   |          |         |          |   |          |          |          |   |          |         |          |   |          |          |          |   |          |          |          |   |          |          |          |   |          |          |          |   |          |         |         |   |          |         |         |   |         |          |          |   |          |          |          |   |          |          |          |   |          |          |          |   |          |          |         |   |          |          |         |   |         |         |          |   |         |         |          |   |         |         |          |   |         |         |          |   |          |         |          |   |          |          |         |
| C                                                                                                                                                                                                                     | -0.88275                                                                                                                                                                                                                                                                                                                                                                                                                                                                                                                                                                                                                                                                                                                                                                                                                                                                                                                                                                                                                                                                                                                                                                                                                                                                                                                                                                                                                                                                                                                                                                                                                                                                                                                                                                                                                                                                                                                                                                                                                                                                                                                                                                                                                                                                                                                                                                                                                                                                                                                                                                                                                                                                                                                                                                                     | -1.11959 | -3.63595 |          |          |   |          |         |          |   |          |          |          |   |          |          |          |   |          |         |          |   |          |          |          |   |          |          |          |   |          |          |          |   |          |         |          |   |          |          |         |   |                                                                                                                                                                                                                                                                                                                                                                                                                                                                                                                                                                                                                                                                                                                                                                     |          |         |         |          |          |         |         |          |         |          |          |          |          |         |         |          |          |          |         |          |         |         |          |          |          |          |          |          |          |          |          |          |          |          |         |          |          |          |          |          |          |          |   |          |          |          |   |          |          |          |   |          |          |          |   |          |          |         |   |          |          |         |   |          |          |         |   |          |          |         |   |          |          |          |   |          |          |         |   |          |         |         |   |          |         |          |   |          |         |         |   |          |         |         |                                                                                                                                                                                                                       |                                                                                                                                                                                                                                                                                                                                                                                                                                                                                                                                                                                                                                                                                                                                                                                                                                                                                                                                                                                                                                                                                                                                                                                                                                                                                                                                                                                                                                                                                                                                                                                                                                                                                                                                                                                                                                                                                                                                                                                                                                                                                                                                                                                                                                                                                                                                                                                                                                                                                                         |         |          |         |          |          |         |         |          |         |          |          |          |         |          |                                                                                                                                                                                                                        |                                                                                                                                                                                                                                                                                                                                                                                                                                                                                                                                                                                                                                                                                                                                                                                                                                                                                                                                                                                                                                                                                                                                                                                                                                                                                                                                                                                                                                                                                                                                                                                                                                                                                                                                                                                                                                                                                                                                                                                                                                                                                                                                                                                                                                                                                                                                                                                                                                                                                                                                                                                                                                                                                                                                                                                                |   |          |          |          |   |         |          |          |   |          |          |          |   |          |          |          |   |          |          |         |   |          |          |         |   |          |          |          |   |          |          |          |   |          |          |          |   |         |          |         |   |          |          |         |   |          |         |          |   |          |          |          |   |          |         |          |   |          |          |         |   |          |          |          |   |          |          |         |   |          |         |          |   |          |          |          |   |          |         |          |   |          |          |          |   |          |          |          |   |          |          |          |   |          |          |          |   |          |         |         |   |          |         |         |   |         |          |          |   |          |          |          |   |          |          |          |   |          |          |          |   |          |          |         |   |          |          |         |   |         |         |          |   |         |         |          |   |         |         |          |   |         |         |          |   |          |         |          |   |          |          |         |
| H                                                                                                                                                                                                                     | -1.59521                                                                                                                                                                                                                                                                                                                                                                                                                                                                                                                                                                                                                                                                                                                                                                                                                                                                                                                                                                                                                                                                                                                                                                                                                                                                                                                                                                                                                                                                                                                                                                                                                                                                                                                                                                                                                                                                                                                                                                                                                                                                                                                                                                                                                                                                                                                                                                                                                                                                                                                                                                                                                                                                                                                                                                                     | -1.94522 | -3.71108 |          |          |   |          |         |          |   |          |          |          |   |          |          |          |   |          |         |          |   |          |          |          |   |          |          |          |   |          |          |          |   |          |         |          |   |          |          |         |   |                                                                                                                                                                                                                                                                                                                                                                                                                                                                                                                                                                                                                                                                                                                                                                     |          |         |         |          |          |         |         |          |         |          |          |          |          |         |         |          |          |          |         |          |         |         |          |          |          |          |          |          |          |          |          |          |          |          |         |          |          |          |          |          |          |          |   |          |          |          |   |          |          |          |   |          |          |          |   |          |          |         |   |          |          |         |   |          |          |         |   |          |          |         |   |          |          |          |   |          |          |         |   |          |         |         |   |          |         |          |   |          |         |         |   |          |         |         |                                                                                                                                                                                                                       |                                                                                                                                                                                                                                                                                                                                                                                                                                                                                                                                                                                                                                                                                                                                                                                                                                                                                                                                                                                                                                                                                                                                                                                                                                                                                                                                                                                                                                                                                                                                                                                                                                                                                                                                                                                                                                                                                                                                                                                                                                                                                                                                                                                                                                                                                                                                                                                                                                                                                                         |         |          |         |          |          |         |         |          |         |          |          |          |         |          |                                                                                                                                                                                                                        |                                                                                                                                                                                                                                                                                                                                                                                                                                                                                                                                                                                                                                                                                                                                                                                                                                                                                                                                                                                                                                                                                                                                                                                                                                                                                                                                                                                                                                                                                                                                                                                                                                                                                                                                                                                                                                                                                                                                                                                                                                                                                                                                                                                                                                                                                                                                                                                                                                                                                                                                                                                                                                                                                                                                                                                                |   |          |          |          |   |         |          |          |   |          |          |          |   |          |          |          |   |          |          |         |   |          |          |         |   |          |          |          |   |          |          |          |   |          |          |          |   |         |          |         |   |          |          |         |   |          |         |          |   |          |          |          |   |          |         |          |   |          |          |         |   |          |          |          |   |          |          |         |   |          |         |          |   |          |          |          |   |          |         |          |   |          |          |          |   |          |          |          |   |          |          |          |   |          |          |          |   |          |         |         |   |          |         |         |   |         |          |          |   |          |          |          |   |          |          |          |   |          |          |          |   |          |          |         |   |          |          |         |   |         |         |          |   |         |         |          |   |         |         |          |   |         |         |          |   |          |         |          |   |          |          |         |
| H                                                                                                                                                                                                                     | 0.10348                                                                                                                                                                                                                                                                                                                                                                                                                                                                                                                                                                                                                                                                                                                                                                                                                                                                                                                                                                                                                                                                                                                                                                                                                                                                                                                                                                                                                                                                                                                                                                                                                                                                                                                                                                                                                                                                                                                                                                                                                                                                                                                                                                                                                                                                                                                                                                                                                                                                                                                                                                                                                                                                                                                                                                                      | -1.45777 | -3.96597 |          |          |   |          |         |          |   |          |          |          |   |          |          |          |   |          |         |          |   |          |          |          |   |          |          |          |   |          |          |          |   |          |         |          |   |          |          |         |   |                                                                                                                                                                                                                                                                                                                                                                                                                                                                                                                                                                                                                                                                                                                                                                     |          |         |         |          |          |         |         |          |         |          |          |          |          |         |         |          |          |          |         |          |         |         |          |          |          |          |          |          |          |          |          |          |          |          |         |          |          |          |          |          |          |          |   |          |          |          |   |          |          |          |   |          |          |          |   |          |          |         |   |          |          |         |   |          |          |         |   |          |          |         |   |          |          |          |   |          |          |         |   |          |         |         |   |          |         |          |   |          |         |         |   |          |         |         |                                                                                                                                                                                                                       |                                                                                                                                                                                                                                                                                                                                                                                                                                                                                                                                                                                                                                                                                                                                                                                                                                                                                                                                                                                                                                                                                                                                                                                                                                                                                                                                                                                                                                                                                                                                                                                                                                                                                                                                                                                                                                                                                                                                                                                                                                                                                                                                                                                                                                                                                                                                                                                                                                                                                                         |         |          |         |          |          |         |         |          |         |          |          |          |         |          |                                                                                                                                                                                                                        |                                                                                                                                                                                                                                                                                                                                                                                                                                                                                                                                                                                                                                                                                                                                                                                                                                                                                                                                                                                                                                                                                                                                                                                                                                                                                                                                                                                                                                                                                                                                                                                                                                                                                                                                                                                                                                                                                                                                                                                                                                                                                                                                                                                                                                                                                                                                                                                                                                                                                                                                                                                                                                                                                                                                                                                                |   |          |          |          |   |         |          |          |   |          |          |          |   |          |          |          |   |          |          |         |   |          |          |         |   |          |          |          |   |          |          |          |   |          |          |          |   |         |          |         |   |          |          |         |   |          |         |          |   |          |          |          |   |          |         |          |   |          |          |         |   |          |          |          |   |          |          |         |   |          |         |          |   |          |          |          |   |          |         |          |   |          |          |          |   |          |          |          |   |          |          |          |   |          |          |          |   |          |         |         |   |          |         |         |   |         |          |          |   |          |          |          |   |          |          |          |   |          |          |          |   |          |          |         |   |          |          |         |   |         |         |          |   |         |         |          |   |         |         |          |   |         |         |          |   |          |         |          |   |          |          |         |
| H                                                                                                                                                                                                                     | -1.20217                                                                                                                                                                                                                                                                                                                                                                                                                                                                                                                                                                                                                                                                                                                                                                                                                                                                                                                                                                                                                                                                                                                                                                                                                                                                                                                                                                                                                                                                                                                                                                                                                                                                                                                                                                                                                                                                                                                                                                                                                                                                                                                                                                                                                                                                                                                                                                                                                                                                                                                                                                                                                                                                                                                                                                                     | -0.27517 | -4.24067 |          |          |   |          |         |          |   |          |          |          |   |          |          |          |   |          |         |          |   |          |          |          |   |          |          |          |   |          |          |          |   |          |         |          |   |          |          |         |   |                                                                                                                                                                                                                                                                                                                                                                                                                                                                                                                                                                                                                                                                                                                                                                     |          |         |         |          |          |         |         |          |         |          |          |          |          |         |         |          |          |          |         |          |         |         |          |          |          |          |          |          |          |          |          |          |          |          |         |          |          |          |          |          |          |          |   |          |          |          |   |          |          |          |   |          |          |          |   |          |          |         |   |          |          |         |   |          |          |         |   |          |          |         |   |          |          |          |   |          |          |         |   |          |         |         |   |          |         |          |   |          |         |         |   |          |         |         |                                                                                                                                                                                                                       |                                                                                                                                                                                                                                                                                                                                                                                                                                                                                                                                                                                                                                                                                                                                                                                                                                                                                                                                                                                                                                                                                                                                                                                                                                                                                                                                                                                                                                                                                                                                                                                                                                                                                                                                                                                                                                                                                                                                                                                                                                                                                                                                                                                                                                                                                                                                                                                                                                                                                                         |         |          |         |          |          |         |         |          |         |          |          |          |         |          |                                                                                                                                                                                                                        |                                                                                                                                                                                                                                                                                                                                                                                                                                                                                                                                                                                                                                                                                                                                                                                                                                                                                                                                                                                                                                                                                                                                                                                                                                                                                                                                                                                                                                                                                                                                                                                                                                                                                                                                                                                                                                                                                                                                                                                                                                                                                                                                                                                                                                                                                                                                                                                                                                                                                                                                                                                                                                                                                                                                                                                                |   |          |          |          |   |         |          |          |   |          |          |          |   |          |          |          |   |          |          |         |   |          |          |         |   |          |          |          |   |          |          |          |   |          |          |          |   |         |          |         |   |          |          |         |   |          |         |          |   |          |          |          |   |          |         |          |   |          |          |         |   |          |          |          |   |          |          |         |   |          |         |          |   |          |          |          |   |          |         |          |   |          |          |          |   |          |          |          |   |          |          |          |   |          |          |          |   |          |         |         |   |          |         |         |   |         |          |          |   |          |          |          |   |          |          |          |   |          |          |          |   |          |          |         |   |          |          |         |   |         |         |          |   |         |         |          |   |         |         |          |   |         |         |          |   |          |         |          |   |          |          |         |
| C                                                                                                                                                                                                                     | 0.86532                                                                                                                                                                                                                                                                                                                                                                                                                                                                                                                                                                                                                                                                                                                                                                                                                                                                                                                                                                                                                                                                                                                                                                                                                                                                                                                                                                                                                                                                                                                                                                                                                                                                                                                                                                                                                                                                                                                                                                                                                                                                                                                                                                                                                                                                                                                                                                                                                                                                                                                                                                                                                                                                                                                                                                                      | 1.13812  | 3.63656  |          |          |   |          |         |          |   |          |          |          |   |          |          |          |   |          |         |          |   |          |          |          |   |          |          |          |   |          |          |          |   |          |         |          |   |          |          |         |   |                                                                                                                                                                                                                                                                                                                                                                                                                                                                                                                                                                                                                                                                                                                                                                     |          |         |         |          |          |         |         |          |         |          |          |          |          |         |         |          |          |          |         |          |         |         |          |          |          |          |          |          |          |          |          |          |          |          |         |          |          |          |          |          |          |          |   |          |          |          |   |          |          |          |   |          |          |          |   |          |          |         |   |          |          |         |   |          |          |         |   |          |          |         |   |          |          |          |   |          |          |         |   |          |         |         |   |          |         |          |   |          |         |         |   |          |         |         |                                                                                                                                                                                                                       |                                                                                                                                                                                                                                                                                                                                                                                                                                                                                                                                                                                                                                                                                                                                                                                                                                                                                                                                                                                                                                                                                                                                                                                                                                                                                                                                                                                                                                                                                                                                                                                                                                                                                                                                                                                                                                                                                                                                                                                                                                                                                                                                                                                                                                                                                                                                                                                                                                                                                                         |         |          |         |          |          |         |         |          |         |          |          |          |         |          |                                                                                                                                                                                                                        |                                                                                                                                                                                                                                                                                                                                                                                                                                                                                                                                                                                                                                                                                                                                                                                                                                                                                                                                                                                                                                                                                                                                                                                                                                                                                                                                                                                                                                                                                                                                                                                                                                                                                                                                                                                                                                                                                                                                                                                                                                                                                                                                                                                                                                                                                                                                                                                                                                                                                                                                                                                                                                                                                                                                                                                                |   |          |          |          |   |         |          |          |   |          |          |          |   |          |          |          |   |          |          |         |   |          |          |         |   |          |          |          |   |          |          |          |   |          |          |          |   |         |          |         |   |          |          |         |   |          |         |          |   |          |          |          |   |          |         |          |   |          |          |         |   |          |          |          |   |          |          |         |   |          |         |          |   |          |          |          |   |          |         |          |   |          |          |          |   |          |          |          |   |          |          |          |   |          |          |          |   |          |         |         |   |          |         |         |   |         |          |          |   |          |          |          |   |          |          |          |   |          |          |          |   |          |          |         |   |          |          |         |   |         |         |          |   |         |         |          |   |         |         |          |   |         |         |          |   |          |         |          |   |          |          |         |
| H                                                                                                                                                                                                                     | 1.57766                                                                                                                                                                                                                                                                                                                                                                                                                                                                                                                                                                                                                                                                                                                                                                                                                                                                                                                                                                                                                                                                                                                                                                                                                                                                                                                                                                                                                                                                                                                                                                                                                                                                                                                                                                                                                                                                                                                                                                                                                                                                                                                                                                                                                                                                                                                                                                                                                                                                                                                                                                                                                                                                                                                                                                                      | 1.96387  | 3.71154  |          |          |   |          |         |          |   |          |          |          |   |          |          |          |   |          |         |          |   |          |          |          |   |          |          |          |   |          |          |          |   |          |         |          |   |          |          |         |   |                                                                                                                                                                                                                                                                                                                                                                                                                                                                                                                                                                                                                                                                                                                                                                     |          |         |         |          |          |         |         |          |         |          |          |          |          |         |         |          |          |          |         |          |         |         |          |          |          |          |          |          |          |          |          |          |          |          |         |          |          |          |          |          |          |          |   |          |          |          |   |          |          |          |   |          |          |          |   |          |          |         |   |          |          |         |   |          |          |         |   |          |          |         |   |          |          |          |   |          |          |         |   |          |         |         |   |          |         |          |   |          |         |         |   |          |         |         |                                                                                                                                                                                                                       |                                                                                                                                                                                                                                                                                                                                                                                                                                                                                                                                                                                                                                                                                                                                                                                                                                                                                                                                                                                                                                                                                                                                                                                                                                                                                                                                                                                                                                                                                                                                                                                                                                                                                                                                                                                                                                                                                                                                                                                                                                                                                                                                                                                                                                                                                                                                                                                                                                                                                                         |         |          |         |          |          |         |         |          |         |          |          |          |         |          |                                                                                                                                                                                                                        |                                                                                                                                                                                                                                                                                                                                                                                                                                                                                                                                                                                                                                                                                                                                                                                                                                                                                                                                                                                                                                                                                                                                                                                                                                                                                                                                                                                                                                                                                                                                                                                                                                                                                                                                                                                                                                                                                                                                                                                                                                                                                                                                                                                                                                                                                                                                                                                                                                                                                                                                                                                                                                                                                                                                                                                                |   |          |          |          |   |         |          |          |   |          |          |          |   |          |          |          |   |          |          |         |   |          |          |         |   |          |          |          |   |          |          |          |   |          |          |          |   |         |          |         |   |          |          |         |   |          |         |          |   |          |          |          |   |          |         |          |   |          |          |         |   |          |          |          |   |          |          |         |   |          |         |          |   |          |          |          |   |          |         |          |   |          |          |          |   |          |          |          |   |          |          |          |   |          |          |          |   |          |         |         |   |          |         |         |   |         |          |          |   |          |          |          |   |          |          |          |   |          |          |          |   |          |          |         |   |          |          |         |   |         |         |          |   |         |         |          |   |         |         |          |   |         |         |          |   |          |         |          |   |          |          |         |
| H                                                                                                                                                                                                                     | 1.18515                                                                                                                                                                                                                                                                                                                                                                                                                                                                                                                                                                                                                                                                                                                                                                                                                                                                                                                                                                                                                                                                                                                                                                                                                                                                                                                                                                                                                                                                                                                                                                                                                                                                                                                                                                                                                                                                                                                                                                                                                                                                                                                                                                                                                                                                                                                                                                                                                                                                                                                                                                                                                                                                                                                                                                                      | 0.29364  | 4.24096  |          |          |   |          |         |          |   |          |          |          |   |          |          |          |   |          |         |          |   |          |          |          |   |          |          |          |   |          |          |          |   |          |         |          |   |          |          |         |   |                                                                                                                                                                                                                                                                                                                                                                                                                                                                                                                                                                                                                                                                                                                                                                     |          |         |         |          |          |         |         |          |         |          |          |          |          |         |         |          |          |          |         |          |         |         |          |          |          |          |          |          |          |          |          |          |          |          |         |          |          |          |          |          |          |          |   |          |          |          |   |          |          |          |   |          |          |          |   |          |          |         |   |          |          |         |   |          |          |         |   |          |          |         |   |          |          |          |   |          |          |         |   |          |         |         |   |          |         |          |   |          |         |         |   |          |         |         |                                                                                                                                                                                                                       |                                                                                                                                                                                                                                                                                                                                                                                                                                                                                                                                                                                                                                                                                                                                                                                                                                                                                                                                                                                                                                                                                                                                                                                                                                                                                                                                                                                                                                                                                                                                                                                                                                                                                                                                                                                                                                                                                                                                                                                                                                                                                                                                                                                                                                                                                                                                                                                                                                                                                                         |         |          |         |          |          |         |         |          |         |          |          |          |         |          |                                                                                                                                                                                                                        |                                                                                                                                                                                                                                                                                                                                                                                                                                                                                                                                                                                                                                                                                                                                                                                                                                                                                                                                                                                                                                                                                                                                                                                                                                                                                                                                                                                                                                                                                                                                                                                                                                                                                                                                                                                                                                                                                                                                                                                                                                                                                                                                                                                                                                                                                                                                                                                                                                                                                                                                                                                                                                                                                                                                                                                                |   |          |          |          |   |         |          |          |   |          |          |          |   |          |          |          |   |          |          |         |   |          |          |         |   |          |          |          |   |          |          |          |   |          |          |          |   |         |          |         |   |          |          |         |   |          |         |          |   |          |          |          |   |          |         |          |   |          |          |         |   |          |          |          |   |          |          |         |   |          |         |          |   |          |          |          |   |          |         |          |   |          |          |          |   |          |          |          |   |          |          |          |   |          |          |          |   |          |         |         |   |          |         |         |   |         |          |          |   |          |          |          |   |          |          |          |   |          |          |          |   |          |          |         |   |          |          |         |   |         |         |          |   |         |         |          |   |         |         |          |   |         |         |          |   |          |         |          |   |          |          |         |
| H                                                                                                                                                                                                                     | -0.12083                                                                                                                                                                                                                                                                                                                                                                                                                                                                                                                                                                                                                                                                                                                                                                                                                                                                                                                                                                                                                                                                                                                                                                                                                                                                                                                                                                                                                                                                                                                                                                                                                                                                                                                                                                                                                                                                                                                                                                                                                                                                                                                                                                                                                                                                                                                                                                                                                                                                                                                                                                                                                                                                                                                                                                                     | 1.47602  | 3.96710  |          |          |   |          |         |          |   |          |          |          |   |          |          |          |   |          |         |          |   |          |          |          |   |          |          |          |   |          |          |          |   |          |         |          |   |          |          |         |   |                                                                                                                                                                                                                                                                                                                                                                                                                                                                                                                                                                                                                                                                                                                                                                     |          |         |         |          |          |         |         |          |         |          |          |          |          |         |         |          |          |          |         |          |         |         |          |          |          |          |          |          |          |          |          |          |          |          |         |          |          |          |          |          |          |          |   |          |          |          |   |          |          |          |   |          |          |          |   |          |          |         |   |          |          |         |   |          |          |         |   |          |          |         |   |          |          |          |   |          |          |         |   |          |         |         |   |          |         |          |   |          |         |         |   |          |         |         |                                                                                                                                                                                                                       |                                                                                                                                                                                                                                                                                                                                                                                                                                                                                                                                                                                                                                                                                                                                                                                                                                                                                                                                                                                                                                                                                                                                                                                                                                                                                                                                                                                                                                                                                                                                                                                                                                                                                                                                                                                                                                                                                                                                                                                                                                                                                                                                                                                                                                                                                                                                                                                                                                                                                                         |         |          |         |          |          |         |         |          |         |          |          |          |         |          |                                                                                                                                                                                                                        |                                                                                                                                                                                                                                                                                                                                                                                                                                                                                                                                                                                                                                                                                                                                                                                                                                                                                                                                                                                                                                                                                                                                                                                                                                                                                                                                                                                                                                                                                                                                                                                                                                                                                                                                                                                                                                                                                                                                                                                                                                                                                                                                                                                                                                                                                                                                                                                                                                                                                                                                                                                                                                                                                                                                                                                                |   |          |          |          |   |         |          |          |   |          |          |          |   |          |          |          |   |          |          |         |   |          |          |         |   |          |          |          |   |          |          |          |   |          |          |          |   |         |          |         |   |          |          |         |   |          |         |          |   |          |          |          |   |          |         |          |   |          |          |         |   |          |          |          |   |          |          |         |   |          |         |          |   |          |          |          |   |          |         |          |   |          |          |          |   |          |          |          |   |          |          |          |   |          |          |          |   |          |         |         |   |          |         |         |   |         |          |          |   |          |          |          |   |          |          |          |   |          |          |          |   |          |          |         |   |          |          |         |   |         |         |          |   |         |         |          |   |         |         |          |   |         |         |          |   |          |         |          |   |          |          |         |
| C                                                                                                                                                                                                                     | -0.51185                                                                                                                                                                                                                                                                                                                                                                                                                                                                                                                                                                                                                                                                                                                                                                                                                                                                                                                                                                                                                                                                                                                                                                                                                                                                                                                                                                                                                                                                                                                                                                                                                                                                                                                                                                                                                                                                                                                                                                                                                                                                                                                                                                                                                                                                                                                                                                                                                                                                                                                                                                                                                                                                                                                                                                                     | -1.35288 | 2.44094  |          |          |   |          |         |          |   |          |          |          |   |          |          |          |   |          |         |          |   |          |          |          |   |          |          |          |   |          |          |          |   |          |         |          |   |          |          |         |   |                                                                                                                                                                                                                                                                                                                                                                                                                                                                                                                                                                                                                                                                                                                                                                     |          |         |         |          |          |         |         |          |         |          |          |          |          |         |         |          |          |          |         |          |         |         |          |          |          |          |          |          |          |          |          |          |          |          |         |          |          |          |          |          |          |          |   |          |          |          |   |          |          |          |   |          |          |          |   |          |          |         |   |          |          |         |   |          |          |         |   |          |          |         |   |          |          |          |   |          |          |         |   |          |         |         |   |          |         |          |   |          |         |         |   |          |         |         |                                                                                                                                                                                                                       |                                                                                                                                                                                                                                                                                                                                                                                                                                                                                                                                                                                                                                                                                                                                                                                                                                                                                                                                                                                                                                                                                                                                                                                                                                                                                                                                                                                                                                                                                                                                                                                                                                                                                                                                                                                                                                                                                                                                                                                                                                                                                                                                                                                                                                                                                                                                                                                                                                                                                                         |         |          |         |          |          |         |         |          |         |          |          |          |         |          |                                                                                                                                                                                                                        |                                                                                                                                                                                                                                                                                                                                                                                                                                                                                                                                                                                                                                                                                                                                                                                                                                                                                                                                                                                                                                                                                                                                                                                                                                                                                                                                                                                                                                                                                                                                                                                                                                                                                                                                                                                                                                                                                                                                                                                                                                                                                                                                                                                                                                                                                                                                                                                                                                                                                                                                                                                                                                                                                                                                                                                                |   |          |          |          |   |         |          |          |   |          |          |          |   |          |          |          |   |          |          |         |   |          |          |         |   |          |          |          |   |          |          |          |   |          |          |          |   |         |          |         |   |          |          |         |   |          |         |          |   |          |          |          |   |          |         |          |   |          |          |         |   |          |          |          |   |          |          |         |   |          |         |          |   |          |          |          |   |          |         |          |   |          |          |          |   |          |          |          |   |          |          |          |   |          |          |          |   |          |         |         |   |          |         |         |   |         |          |          |   |          |          |          |   |          |          |          |   |          |          |          |   |          |          |         |   |          |          |         |   |         |         |          |   |         |         |          |   |         |         |          |   |         |         |          |   |          |         |          |   |          |          |         |
| N                                                                                                                                                                                                                     | -1.69398                                                                                                                                                                                                                                                                                                                                                                                                                                                                                                                                                                                                                                                                                                                                                                                                                                                                                                                                                                                                                                                                                                                                                                                                                                                                                                                                                                                                                                                                                                                                                                                                                                                                                                                                                                                                                                                                                                                                                                                                                                                                                                                                                                                                                                                                                                                                                                                                                                                                                                                                                                                                                                                                                                                                                                                     | -0.66989 | 2.47766  |          |          |   |          |         |          |   |          |          |          |   |          |          |          |   |          |         |          |   |          |          |          |   |          |          |          |   |          |          |          |   |          |         |          |   |          |          |         |   |                                                                                                                                                                                                                                                                                                                                                                                                                                                                                                                                                                                                                                                                                                                                                                     |          |         |         |          |          |         |         |          |         |          |          |          |          |         |         |          |          |          |         |          |         |         |          |          |          |          |          |          |          |          |          |          |          |          |         |          |          |          |          |          |          |          |   |          |          |          |   |          |          |          |   |          |          |          |   |          |          |         |   |          |          |         |   |          |          |         |   |          |          |         |   |          |          |          |   |          |          |         |   |          |         |         |   |          |         |          |   |          |         |         |   |          |         |         |                                                                                                                                                                                                                       |                                                                                                                                                                                                                                                                                                                                                                                                                                                                                                                                                                                                                                                                                                                                                                                                                                                                                                                                                                                                                                                                                                                                                                                                                                                                                                                                                                                                                                                                                                                                                                                                                                                                                                                                                                                                                                                                                                                                                                                                                                                                                                                                                                                                                                                                                                                                                                                                                                                                                                         |         |          |         |          |          |         |         |          |         |          |          |          |         |          |                                                                                                                                                                                                                        |                                                                                                                                                                                                                                                                                                                                                                                                                                                                                                                                                                                                                                                                                                                                                                                                                                                                                                                                                                                                                                                                                                                                                                                                                                                                                                                                                                                                                                                                                                                                                                                                                                                                                                                                                                                                                                                                                                                                                                                                                                                                                                                                                                                                                                                                                                                                                                                                                                                                                                                                                                                                                                                                                                                                                                                                |   |          |          |          |   |         |          |          |   |          |          |          |   |          |          |          |   |          |          |         |   |          |          |         |   |          |          |          |   |          |          |          |   |          |          |          |   |         |          |         |   |          |          |         |   |          |         |          |   |          |          |          |   |          |         |          |   |          |          |         |   |          |          |          |   |          |          |         |   |          |         |          |   |          |          |          |   |          |         |          |   |          |          |          |   |          |          |          |   |          |          |          |   |          |          |          |   |          |         |         |   |          |         |         |   |         |          |          |   |          |          |          |   |          |          |          |   |          |          |          |   |          |          |         |   |          |          |         |   |         |         |          |   |         |         |          |   |         |         |          |   |         |         |          |   |          |         |          |   |          |          |         |
| H                                                                                                                                                                                                                     | -2.05732                                                                                                                                                                                                                                                                                                                                                                                                                                                                                                                                                                                                                                                                                                                                                                                                                                                                                                                                                                                                                                                                                                                                                                                                                                                                                                                                                                                                                                                                                                                                                                                                                                                                                                                                                                                                                                                                                                                                                                                                                                                                                                                                                                                                                                                                                                                                                                                                                                                                                                                                                                                                                                                                                                                                                                                     | -0.20973 | 1.66199  |          |          |   |          |         |          |   |          |          |          |   |          |          |          |   |          |         |          |   |          |          |          |   |          |          |          |   |          |          |          |   |          |         |          |   |          |          |         |   |                                                                                                                                                                                                                                                                                                                                                                                                                                                                                                                                                                                                                                                                                                                                                                     |          |         |         |          |          |         |         |          |         |          |          |          |          |         |         |          |          |          |         |          |         |         |          |          |          |          |          |          |          |          |          |          |          |          |         |          |          |          |          |          |          |          |   |          |          |          |   |          |          |          |   |          |          |          |   |          |          |         |   |          |          |         |   |          |          |         |   |          |          |         |   |          |          |          |   |          |          |         |   |          |         |         |   |          |         |          |   |          |         |         |   |          |         |         |                                                                                                                                                                                                                       |                                                                                                                                                                                                                                                                                                                                                                                                                                                                                                                                                                                                                                                                                                                                                                                                                                                                                                                                                                                                                                                                                                                                                                                                                                                                                                                                                                                                                                                                                                                                                                                                                                                                                                                                                                                                                                                                                                                                                                                                                                                                                                                                                                                                                                                                                                                                                                                                                                                                                                         |         |          |         |          |          |         |         |          |         |          |          |          |         |          |                                                                                                                                                                                                                        |                                                                                                                                                                                                                                                                                                                                                                                                                                                                                                                                                                                                                                                                                                                                                                                                                                                                                                                                                                                                                                                                                                                                                                                                                                                                                                                                                                                                                                                                                                                                                                                                                                                                                                                                                                                                                                                                                                                                                                                                                                                                                                                                                                                                                                                                                                                                                                                                                                                                                                                                                                                                                                                                                                                                                                                                |   |          |          |          |   |         |          |          |   |          |          |          |   |          |          |          |   |          |          |         |   |          |          |         |   |          |          |          |   |          |          |          |   |          |          |          |   |         |          |         |   |          |          |         |   |          |         |          |   |          |          |          |   |          |         |          |   |          |          |         |   |          |          |          |   |          |          |         |   |          |         |          |   |          |          |          |   |          |         |          |   |          |          |          |   |          |          |          |   |          |          |          |   |          |          |          |   |          |         |         |   |          |         |         |   |         |          |          |   |          |          |          |   |          |          |          |   |          |          |          |   |          |          |         |   |          |          |         |   |         |         |          |   |         |         |          |   |         |         |          |   |         |         |          |   |          |         |          |   |          |          |         |
| H                                                                                                                                                                                                                     | -2.08737                                                                                                                                                                                                                                                                                                                                                                                                                                                                                                                                                                                                                                                                                                                                                                                                                                                                                                                                                                                                                                                                                                                                                                                                                                                                                                                                                                                                                                                                                                                                                                                                                                                                                                                                                                                                                                                                                                                                                                                                                                                                                                                                                                                                                                                                                                                                                                                                                                                                                                                                                                                                                                                                                                                                                                                     | -0.45644 | 3.37804  |          |          |   |          |         |          |   |          |          |          |   |          |          |          |   |          |         |          |   |          |          |          |   |          |          |          |   |          |          |          |   |          |         |          |   |          |          |         |   |                                                                                                                                                                                                                                                                                                                                                                                                                                                                                                                                                                                                                                                                                                                                                                     |          |         |         |          |          |         |         |          |         |          |          |          |          |         |         |          |          |          |         |          |         |         |          |          |          |          |          |          |          |          |          |          |          |          |         |          |          |          |          |          |          |          |   |          |          |          |   |          |          |          |   |          |          |          |   |          |          |         |   |          |          |         |   |          |          |         |   |          |          |         |   |          |          |          |   |          |          |         |   |          |         |         |   |          |         |          |   |          |         |         |   |          |         |         |                                                                                                                                                                                                                       |                                                                                                                                                                                                                                                                                                                                                                                                                                                                                                                                                                                                                                                                                                                                                                                                                                                                                                                                                                                                                                                                                                                                                                                                                                                                                                                                                                                                                                                                                                                                                                                                                                                                                                                                                                                                                                                                                                                                                                                                                                                                                                                                                                                                                                                                                                                                                                                                                                                                                                         |         |          |         |          |          |         |         |          |         |          |          |          |         |          |                                                                                                                                                                                                                        |                                                                                                                                                                                                                                                                                                                                                                                                                                                                                                                                                                                                                                                                                                                                                                                                                                                                                                                                                                                                                                                                                                                                                                                                                                                                                                                                                                                                                                                                                                                                                                                                                                                                                                                                                                                                                                                                                                                                                                                                                                                                                                                                                                                                                                                                                                                                                                                                                                                                                                                                                                                                                                                                                                                                                                                                |   |          |          |          |   |         |          |          |   |          |          |          |   |          |          |          |   |          |          |         |   |          |          |         |   |          |          |          |   |          |          |          |   |          |          |          |   |         |          |         |   |          |          |         |   |          |         |          |   |          |          |          |   |          |         |          |   |          |          |         |   |          |          |          |   |          |          |         |   |          |         |          |   |          |          |          |   |          |         |          |   |          |          |          |   |          |          |          |   |          |          |          |   |          |          |          |   |          |         |         |   |          |         |         |   |         |          |          |   |          |          |          |   |          |          |          |   |          |          |          |   |          |          |         |   |          |          |         |   |         |         |          |   |         |         |          |   |         |         |          |   |         |         |          |   |          |         |          |   |          |          |         |
| C                                                                                                                                                                                                                     | 0.49183                                                                                                                                                                                                                                                                                                                                                                                                                                                                                                                                                                                                                                                                                                                                                                                                                                                                                                                                                                                                                                                                                                                                                                                                                                                                                                                                                                                                                                                                                                                                                                                                                                                                                                                                                                                                                                                                                                                                                                                                                                                                                                                                                                                                                                                                                                                                                                                                                                                                                                                                                                                                                                                                                                                                                                                      | 1.37286  | -2.44004 |          |          |   |          |         |          |   |          |          |          |   |          |          |          |   |          |         |          |   |          |          |          |   |          |          |          |   |          |          |          |   |          |         |          |   |          |          |         |   |                                                                                                                                                                                                                                                                                                                                                                                                                                                                                                                                                                                                                                                                                                                                                                     |          |         |         |          |          |         |         |          |         |          |          |          |          |         |         |          |          |          |         |          |         |         |          |          |          |          |          |          |          |          |          |          |          |          |         |          |          |          |          |          |          |          |   |          |          |          |   |          |          |          |   |          |          |          |   |          |          |         |   |          |          |         |   |          |          |         |   |          |          |         |   |          |          |          |   |          |          |         |   |          |         |         |   |          |         |          |   |          |         |         |   |          |         |         |                                                                                                                                                                                                                       |                                                                                                                                                                                                                                                                                                                                                                                                                                                                                                                                                                                                                                                                                                                                                                                                                                                                                                                                                                                                                                                                                                                                                                                                                                                                                                                                                                                                                                                                                                                                                                                                                                                                                                                                                                                                                                                                                                                                                                                                                                                                                                                                                                                                                                                                                                                                                                                                                                                                                                         |         |          |         |          |          |         |         |          |         |          |          |          |         |          |                                                                                                                                                                                                                        |                                                                                                                                                                                                                                                                                                                                                                                                                                                                                                                                                                                                                                                                                                                                                                                                                                                                                                                                                                                                                                                                                                                                                                                                                                                                                                                                                                                                                                                                                                                                                                                                                                                                                                                                                                                                                                                                                                                                                                                                                                                                                                                                                                                                                                                                                                                                                                                                                                                                                                                                                                                                                                                                                                                                                                                                |   |          |          |          |   |         |          |          |   |          |          |          |   |          |          |          |   |          |          |         |   |          |          |         |   |          |          |          |   |          |          |          |   |          |          |          |   |         |          |         |   |          |          |         |   |          |         |          |   |          |          |          |   |          |         |          |   |          |          |         |   |          |          |          |   |          |          |         |   |          |         |          |   |          |          |          |   |          |         |          |   |          |          |          |   |          |          |          |   |          |          |          |   |          |          |          |   |          |         |         |   |          |         |         |   |         |          |          |   |          |          |          |   |          |          |          |   |          |          |          |   |          |          |         |   |          |          |         |   |         |         |          |   |         |         |          |   |         |         |          |   |         |         |          |   |          |         |          |   |          |          |         |
| N                                                                                                                                                                                                                     | 1.67445                                                                                                                                                                                                                                                                                                                                                                                                                                                                                                                                                                                                                                                                                                                                                                                                                                                                                                                                                                                                                                                                                                                                                                                                                                                                                                                                                                                                                                                                                                                                                                                                                                                                                                                                                                                                                                                                                                                                                                                                                                                                                                                                                                                                                                                                                                                                                                                                                                                                                                                                                                                                                                                                                                                                                                                      | 0.69072  | -2.47719 |          |          |   |          |         |          |   |          |          |          |   |          |          |          |   |          |         |          |   |          |          |          |   |          |          |          |   |          |          |          |   |          |         |          |   |          |          |         |   |                                                                                                                                                                                                                                                                                                                                                                                                                                                                                                                                                                                                                                                                                                                                                                     |          |         |         |          |          |         |         |          |         |          |          |          |          |         |         |          |          |          |         |          |         |         |          |          |          |          |          |          |          |          |          |          |          |          |         |          |          |          |          |          |          |          |   |          |          |          |   |          |          |          |   |          |          |          |   |          |          |         |   |          |          |         |   |          |          |         |   |          |          |         |   |          |          |          |   |          |          |         |   |          |         |         |   |          |         |          |   |          |         |         |   |          |         |         |                                                                                                                                                                                                                       |                                                                                                                                                                                                                                                                                                                                                                                                                                                                                                                                                                                                                                                                                                                                                                                                                                                                                                                                                                                                                                                                                                                                                                                                                                                                                                                                                                                                                                                                                                                                                                                                                                                                                                                                                                                                                                                                                                                                                                                                                                                                                                                                                                                                                                                                                                                                                                                                                                                                                                         |         |          |         |          |          |         |         |          |         |          |          |          |         |          |                                                                                                                                                                                                                        |                                                                                                                                                                                                                                                                                                                                                                                                                                                                                                                                                                                                                                                                                                                                                                                                                                                                                                                                                                                                                                                                                                                                                                                                                                                                                                                                                                                                                                                                                                                                                                                                                                                                                                                                                                                                                                                                                                                                                                                                                                                                                                                                                                                                                                                                                                                                                                                                                                                                                                                                                                                                                                                                                                                                                                                                |   |          |          |          |   |         |          |          |   |          |          |          |   |          |          |          |   |          |          |         |   |          |          |         |   |          |          |          |   |          |          |          |   |          |          |          |   |         |          |         |   |          |          |         |   |          |         |          |   |          |          |          |   |          |         |          |   |          |          |         |   |          |          |          |   |          |          |         |   |          |         |          |   |          |          |          |   |          |         |          |   |          |          |          |   |          |          |          |   |          |          |          |   |          |          |          |   |          |         |         |   |          |         |         |   |         |          |          |   |          |          |          |   |          |          |          |   |          |          |          |   |          |          |         |   |          |          |         |   |         |         |          |   |         |         |          |   |         |         |          |   |         |         |          |   |          |         |          |   |          |          |         |
| H                                                                                                                                                                                                                     | 2.06758                                                                                                                                                                                                                                                                                                                                                                                                                                                                                                                                                                                                                                                                                                                                                                                                                                                                                                                                                                                                                                                                                                                                                                                                                                                                                                                                                                                                                                                                                                                                                                                                                                                                                                                                                                                                                                                                                                                                                                                                                                                                                                                                                                                                                                                                                                                                                                                                                                                                                                                                                                                                                                                                                                                                                                                      | 0.47746  | -3.37773 |          |          |   |          |         |          |   |          |          |          |   |          |          |          |   |          |         |          |   |          |          |          |   |          |          |          |   |          |          |          |   |          |         |          |   |          |          |         |   |                                                                                                                                                                                                                                                                                                                                                                                                                                                                                                                                                                                                                                                                                                                                                                     |          |         |         |          |          |         |         |          |         |          |          |          |          |         |         |          |          |          |         |          |         |         |          |          |          |          |          |          |          |          |          |          |          |          |         |          |          |          |          |          |          |          |   |          |          |          |   |          |          |          |   |          |          |          |   |          |          |         |   |          |          |         |   |          |          |         |   |          |          |         |   |          |          |          |   |          |          |         |   |          |         |         |   |          |         |          |   |          |         |         |   |          |         |         |                                                                                                                                                                                                                       |                                                                                                                                                                                                                                                                                                                                                                                                                                                                                                                                                                                                                                                                                                                                                                                                                                                                                                                                                                                                                                                                                                                                                                                                                                                                                                                                                                                                                                                                                                                                                                                                                                                                                                                                                                                                                                                                                                                                                                                                                                                                                                                                                                                                                                                                                                                                                                                                                                                                                                         |         |          |         |          |          |         |         |          |         |          |          |          |         |          |                                                                                                                                                                                                                        |                                                                                                                                                                                                                                                                                                                                                                                                                                                                                                                                                                                                                                                                                                                                                                                                                                                                                                                                                                                                                                                                                                                                                                                                                                                                                                                                                                                                                                                                                                                                                                                                                                                                                                                                                                                                                                                                                                                                                                                                                                                                                                                                                                                                                                                                                                                                                                                                                                                                                                                                                                                                                                                                                                                                                                                                |   |          |          |          |   |         |          |          |   |          |          |          |   |          |          |          |   |          |          |         |   |          |          |         |   |          |          |          |   |          |          |          |   |          |          |          |   |         |          |         |   |          |          |         |   |          |         |          |   |          |          |          |   |          |         |          |   |          |          |         |   |          |          |          |   |          |          |         |   |          |         |          |   |          |          |          |   |          |         |          |   |          |          |          |   |          |          |          |   |          |          |          |   |          |          |          |   |          |         |         |   |          |         |         |   |         |          |          |   |          |          |          |   |          |          |          |   |          |          |          |   |          |          |         |   |          |          |         |   |         |         |          |   |         |         |          |   |         |         |          |   |         |         |          |   |          |         |          |   |          |          |         |
| H                                                                                                                                                                                                                     | 2.03810                                                                                                                                                                                                                                                                                                                                                                                                                                                                                                                                                                                                                                                                                                                                                                                                                                                                                                                                                                                                                                                                                                                                                                                                                                                                                                                                                                                                                                                                                                                                                                                                                                                                                                                                                                                                                                                                                                                                                                                                                                                                                                                                                                                                                                                                                                                                                                                                                                                                                                                                                                                                                                                                                                                                                                                      | 0.23039  | -1.66173 |          |          |   |          |         |          |   |          |          |          |   |          |          |          |   |          |         |          |   |          |          |          |   |          |          |          |   |          |          |          |   |          |         |          |   |          |          |         |   |                                                                                                                                                                                                                                                                                                                                                                                                                                                                                                                                                                                                                                                                                                                                                                     |          |         |         |          |          |         |         |          |         |          |          |          |          |         |         |          |          |          |         |          |         |         |          |          |          |          |          |          |          |          |          |          |          |          |         |          |          |          |          |          |          |          |   |          |          |          |   |          |          |          |   |          |          |          |   |          |          |         |   |          |          |         |   |          |          |         |   |          |          |         |   |          |          |          |   |          |          |         |   |          |         |         |   |          |         |          |   |          |         |         |   |          |         |         |                                                                                                                                                                                                                       |                                                                                                                                                                                                                                                                                                                                                                                                                                                                                                                                                                                                                                                                                                                                                                                                                                                                                                                                                                                                                                                                                                                                                                                                                                                                                                                                                                                                                                                                                                                                                                                                                                                                                                                                                                                                                                                                                                                                                                                                                                                                                                                                                                                                                                                                                                                                                                                                                                                                                                         |         |          |         |          |          |         |         |          |         |          |          |          |         |          |                                                                                                                                                                                                                        |                                                                                                                                                                                                                                                                                                                                                                                                                                                                                                                                                                                                                                                                                                                                                                                                                                                                                                                                                                                                                                                                                                                                                                                                                                                                                                                                                                                                                                                                                                                                                                                                                                                                                                                                                                                                                                                                                                                                                                                                                                                                                                                                                                                                                                                                                                                                                                                                                                                                                                                                                                                                                                                                                                                                                                                                |   |          |          |          |   |         |          |          |   |          |          |          |   |          |          |          |   |          |          |         |   |          |          |         |   |          |          |          |   |          |          |          |   |          |          |          |   |         |          |         |   |          |          |         |   |          |         |          |   |          |          |          |   |          |         |          |   |          |          |         |   |          |          |          |   |          |          |         |   |          |         |          |   |          |          |          |   |          |         |          |   |          |          |          |   |          |          |          |   |          |          |          |   |          |          |          |   |          |         |         |   |          |         |         |   |         |          |          |   |          |          |          |   |          |          |          |   |          |          |          |   |          |          |         |   |          |          |         |   |         |         |          |   |         |         |          |   |         |         |          |   |         |         |          |   |          |         |          |   |          |          |         |
| O                                                                                                                                                                                                                     | -0.00523                                                                                                                                                                                                                                                                                                                                                                                                                                                                                                                                                                                                                                                                                                                                                                                                                                                                                                                                                                                                                                                                                                                                                                                                                                                                                                                                                                                                                                                                                                                                                                                                                                                                                                                                                                                                                                                                                                                                                                                                                                                                                                                                                                                                                                                                                                                                                                                                                                                                                                                                                                                                                                                                                                                                                                                     | 1.85417  | -3.44234 |          |          |   |          |         |          |   |          |          |          |   |          |          |          |   |          |         |          |   |          |          |          |   |          |          |          |   |          |          |          |   |          |         |          |   |          |          |         |   |                                                                                                                                                                                                                                                                                                                                                                                                                                                                                                                                                                                                                                                                                                                                                                     |          |         |         |          |          |         |         |          |         |          |          |          |          |         |         |          |          |          |         |          |         |         |          |          |          |          |          |          |          |          |          |          |          |          |         |          |          |          |          |          |          |          |   |          |          |          |   |          |          |          |   |          |          |          |   |          |          |         |   |          |          |         |   |          |          |         |   |          |          |         |   |          |          |          |   |          |          |         |   |          |         |         |   |          |         |          |   |          |         |         |   |          |         |         |                                                                                                                                                                                                                       |                                                                                                                                                                                                                                                                                                                                                                                                                                                                                                                                                                                                                                                                                                                                                                                                                                                                                                                                                                                                                                                                                                                                                                                                                                                                                                                                                                                                                                                                                                                                                                                                                                                                                                                                                                                                                                                                                                                                                                                                                                                                                                                                                                                                                                                                                                                                                                                                                                                                                                         |         |          |         |          |          |         |         |          |         |          |          |          |         |          |                                                                                                                                                                                                                        |                                                                                                                                                                                                                                                                                                                                                                                                                                                                                                                                                                                                                                                                                                                                                                                                                                                                                                                                                                                                                                                                                                                                                                                                                                                                                                                                                                                                                                                                                                                                                                                                                                                                                                                                                                                                                                                                                                                                                                                                                                                                                                                                                                                                                                                                                                                                                                                                                                                                                                                                                                                                                                                                                                                                                                                                |   |          |          |          |   |         |          |          |   |          |          |          |   |          |          |          |   |          |          |         |   |          |          |         |   |          |          |          |   |          |          |          |   |          |          |          |   |         |          |         |   |          |          |         |   |          |         |          |   |          |          |          |   |          |         |          |   |          |          |         |   |          |          |          |   |          |          |         |   |          |         |          |   |          |          |          |   |          |         |          |   |          |          |          |   |          |          |          |   |          |          |          |   |          |          |          |   |          |         |         |   |          |         |         |   |         |          |          |   |          |          |          |   |          |          |          |   |          |          |          |   |          |          |         |   |          |          |         |   |         |         |          |   |         |         |          |   |         |         |          |   |         |         |          |   |          |         |          |   |          |          |         |
| O                                                                                                                                                                                                                     | -0.01536                                                                                                                                                                                                                                                                                                                                                                                                                                                                                                                                                                                                                                                                                                                                                                                                                                                                                                                                                                                                                                                                                                                                                                                                                                                                                                                                                                                                                                                                                                                                                                                                                                                                                                                                                                                                                                                                                                                                                                                                                                                                                                                                                                                                                                                                                                                                                                                                                                                                                                                                                                                                                                                                                                                                                                                     | -1.83430 | 3.44347  |          |          |   |          |         |          |   |          |          |          |   |          |          |          |   |          |         |          |   |          |          |          |   |          |          |          |   |          |          |          |   |          |         |          |   |          |          |         |   |                                                                                                                                                                                                                                                                                                                                                                                                                                                                                                                                                                                                                                                                                                                                                                     |          |         |         |          |          |         |         |          |         |          |          |          |          |         |         |          |          |          |         |          |         |         |          |          |          |          |          |          |          |          |          |          |          |          |         |          |          |          |          |          |          |          |   |          |          |          |   |          |          |          |   |          |          |          |   |          |          |         |   |          |          |         |   |          |          |         |   |          |          |         |   |          |          |          |   |          |          |         |   |          |         |         |   |          |         |          |   |          |         |         |   |          |         |         |                                                                                                                                                                                                                       |                                                                                                                                                                                                                                                                                                                                                                                                                                                                                                                                                                                                                                                                                                                                                                                                                                                                                                                                                                                                                                                                                                                                                                                                                                                                                                                                                                                                                                                                                                                                                                                                                                                                                                                                                                                                                                                                                                                                                                                                                                                                                                                                                                                                                                                                                                                                                                                                                                                                                                         |         |          |         |          |          |         |         |          |         |          |          |          |         |          |                                                                                                                                                                                                                        |                                                                                                                                                                                                                                                                                                                                                                                                                                                                                                                                                                                                                                                                                                                                                                                                                                                                                                                                                                                                                                                                                                                                                                                                                                                                                                                                                                                                                                                                                                                                                                                                                                                                                                                                                                                                                                                                                                                                                                                                                                                                                                                                                                                                                                                                                                                                                                                                                                                                                                                                                                                                                                                                                                                                                                                                |   |          |          |          |   |         |          |          |   |          |          |          |   |          |          |          |   |          |          |         |   |          |          |         |   |          |          |          |   |          |          |          |   |          |          |          |   |         |          |         |   |          |          |         |   |          |         |          |   |          |          |          |   |          |         |          |   |          |          |         |   |          |          |          |   |          |          |         |   |          |         |          |   |          |          |          |   |          |         |          |   |          |          |          |   |          |          |          |   |          |          |          |   |          |          |          |   |          |         |         |   |          |         |         |   |         |          |          |   |          |          |          |   |          |          |          |   |          |          |          |   |          |          |         |   |          |          |         |   |         |         |          |   |         |         |          |   |         |         |          |   |         |         |          |   |          |         |          |   |          |          |         |
|                                                                                                                                                                                                                       | <table border="1"> <tbody> <tr><td>C</td><td>-1.25701</td><td>-0.74450</td><td>-3.26598</td></tr> <tr><td>C</td><td>-0.48794</td><td>0.04276</td><td>-0.69320</td></tr> <tr><td>C</td><td>-1.00428</td><td>-1.70126</td><td>-2.30219</td></tr> <tr><td>C</td><td>-1.12963</td><td>0.60940</td><td>-2.96714</td></tr> <tr><td>C</td><td>-0.74455</td><td>0.99906</td><td>-1.68867</td></tr> <tr><td>C</td><td>-0.62870</td><td>-1.31144</td><td>-1.00862</td></tr> <tr><td>C</td><td>-0.08323</td><td>0.53515</td><td>0.65351</td></tr> <tr><td>C</td><td>0.53668</td><td>1.47215</td><td>3.21640</td></tr> <tr><td>C</td><td>1.24800</td><td>0.68520</td><td>1.05152</td></tr> <tr><td>C</td><td>-1.10178</td><td>0.86821</td><td>1.56071</td></tr> </tbody> </table>                                                                                                                                                                                                                                                                                                                                                                                                                                                                                                                                                                                                                                                                                                                                                                                                                                                                                                                                                                                                                                                                                                                                                                                                                                                                                                                                                                                                                                                                                                                                                                                                                                                                                                                                                                                                                                                                                                                                                                                                                        | C        | -1.25701 | -0.74450 | -3.26598 | C | -0.48794 | 0.04276 | -0.69320 | C | -1.00428 | -1.70126 | -2.30219 | C | -1.12963 | 0.60940  | -2.96714 | C | -0.74455 | 0.99906 | -1.68867 | C | -0.62870 | -1.31144 | -1.00862 | C | -0.08323 | 0.53515  | 0.65351  | C | 0.53668  | 1.47215  | 3.21640  | C | 1.24800  | 0.68520 | 1.05152  | C | -1.10178 | 0.86821  | 1.56071 |   | <table border="1"> <tbody> <tr><td>C</td><td>3.47264</td><td>0.72827</td><td>-0.55732</td></tr> <tr><td>C</td><td>0.72436</td><td>0.17542</td><td>-0.00764</td></tr> <tr><td>C</td><td>3.07721</td><td>-0.54382</td><td>-0.18676</td></tr> <tr><td>C</td><td>2.55878</td><td>1.76311</td><td>-0.44737</td></tr> <tr><td>C</td><td>1.22734</td><td>1.50642</td><td>-0.12212</td></tr> <tr><td>C</td><td>1.74994</td><td>-0.79746</td><td>0.16371</td></tr> <tr><td>C</td><td>-0.72421</td><td>-0.17593</td><td>0.00665</td></tr> <tr><td>C</td><td>-3.47290</td><td>-0.72862</td><td>0.55474</td></tr> <tr><td>C</td><td>-1.74968</td><td>0.79700</td><td>-0.16526</td></tr> <tr><td>C</td><td>-1.22727</td><td>-1.50689</td><td>0.12129</td></tr> </tbody> </table> | C        | 3.47264 | 0.72827 | -0.55732 | C        | 0.72436 | 0.17542 | -0.00764 | C       | 3.07721  | -0.54382 | -0.18676 | C        | 2.55878 | 1.76311 | -0.44737 | C        | 1.22734  | 1.50642 | -0.12212 | C       | 1.74994 | -0.79746 | 0.16371  | C        | -0.72421 | -0.17593 | 0.00665  | C        | -3.47290 | -0.72862 | 0.55474  | C        | -1.74968 | 0.79700 | -0.16526 | C        | -1.22727 | -1.50689 | 0.12129  |          |          |   |          |          |          |   |          |          |          |   |          |          |          |   |          |          |         |   |          |          |         |   |          |          |         |   |          |          |         |   |          |          |          |   |          |          |         |   |          |         |         |   |          |         |          |   |          |         |         |   |          |         |         |                                                                                                                                                                                                                       |                                                                                                                                                                                                                                                                                                                                                                                                                                                                                                                                                                                                                                                                                                                                                                                                                                                                                                                                                                                                                                                                                                                                                                                                                                                                                                                                                                                                                                                                                                                                                                                                                                                                                                                                                                                                                                                                                                                                                                                                                                                                                                                                                                                                                                                                                                                                                                                                                                                                                                         |         |          |         |          |          |         |         |          |         |          |          |          |         |          |                                                                                                                                                                                                                        |                                                                                                                                                                                                                                                                                                                                                                                                                                                                                                                                                                                                                                                                                                                                                                                                                                                                                                                                                                                                                                                                                                                                                                                                                                                                                                                                                                                                                                                                                                                                                                                                                                                                                                                                                                                                                                                                                                                                                                                                                                                                                                                                                                                                                                                                                                                                                                                                                                                                                                                                                                                                                                                                                                                                                                                                |   |          |          |          |   |         |          |          |   |          |          |          |   |          |          |          |   |          |          |         |   |          |          |         |   |          |          |          |   |          |          |          |   |          |          |          |   |         |          |         |   |          |          |         |   |          |         |          |   |          |          |          |   |          |         |          |   |          |          |         |   |          |          |          |   |          |          |         |   |          |         |          |   |          |          |          |   |          |         |          |   |          |          |          |   |          |          |          |   |          |          |          |   |          |          |          |   |          |         |         |   |          |         |         |   |         |          |          |   |          |          |          |   |          |          |          |   |          |          |          |   |          |          |         |   |          |          |         |   |         |         |          |   |         |         |          |   |         |         |          |   |         |         |          |   |          |         |          |   |          |          |         |
| C                                                                                                                                                                                                                     | -1.25701                                                                                                                                                                                                                                                                                                                                                                                                                                                                                                                                                                                                                                                                                                                                                                                                                                                                                                                                                                                                                                                                                                                                                                                                                                                                                                                                                                                                                                                                                                                                                                                                                                                                                                                                                                                                                                                                                                                                                                                                                                                                                                                                                                                                                                                                                                                                                                                                                                                                                                                                                                                                                                                                                                                                                                                     | -0.74450 | -3.26598 |          |          |   |          |         |          |   |          |          |          |   |          |          |          |   |          |         |          |   |          |          |          |   |          |          |          |   |          |          |          |   |          |         |          |   |          |          |         |   |                                                                                                                                                                                                                                                                                                                                                                                                                                                                                                                                                                                                                                                                                                                                                                     |          |         |         |          |          |         |         |          |         |          |          |          |          |         |         |          |          |          |         |          |         |         |          |          |          |          |          |          |          |          |          |          |          |          |         |          |          |          |          |          |          |          |   |          |          |          |   |          |          |          |   |          |          |          |   |          |          |         |   |          |          |         |   |          |          |         |   |          |          |         |   |          |          |          |   |          |          |         |   |          |         |         |   |          |         |          |   |          |         |         |   |          |         |         |                                                                                                                                                                                                                       |                                                                                                                                                                                                                                                                                                                                                                                                                                                                                                                                                                                                                                                                                                                                                                                                                                                                                                                                                                                                                                                                                                                                                                                                                                                                                                                                                                                                                                                                                                                                                                                                                                                                                                                                                                                                                                                                                                                                                                                                                                                                                                                                                                                                                                                                                                                                                                                                                                                                                                         |         |          |         |          |          |         |         |          |         |          |          |          |         |          |                                                                                                                                                                                                                        |                                                                                                                                                                                                                                                                                                                                                                                                                                                                                                                                                                                                                                                                                                                                                                                                                                                                                                                                                                                                                                                                                                                                                                                                                                                                                                                                                                                                                                                                                                                                                                                                                                                                                                                                                                                                                                                                                                                                                                                                                                                                                                                                                                                                                                                                                                                                                                                                                                                                                                                                                                                                                                                                                                                                                                                                |   |          |          |          |   |         |          |          |   |          |          |          |   |          |          |          |   |          |          |         |   |          |          |         |   |          |          |          |   |          |          |          |   |          |          |          |   |         |          |         |   |          |          |         |   |          |         |          |   |          |          |          |   |          |         |          |   |          |          |         |   |          |          |          |   |          |          |         |   |          |         |          |   |          |          |          |   |          |         |          |   |          |          |          |   |          |          |          |   |          |          |          |   |          |          |          |   |          |         |         |   |          |         |         |   |         |          |          |   |          |          |          |   |          |          |          |   |          |          |          |   |          |          |         |   |          |          |         |   |         |         |          |   |         |         |          |   |         |         |          |   |         |         |          |   |          |         |          |   |          |          |         |
| C                                                                                                                                                                                                                     | -0.48794                                                                                                                                                                                                                                                                                                                                                                                                                                                                                                                                                                                                                                                                                                                                                                                                                                                                                                                                                                                                                                                                                                                                                                                                                                                                                                                                                                                                                                                                                                                                                                                                                                                                                                                                                                                                                                                                                                                                                                                                                                                                                                                                                                                                                                                                                                                                                                                                                                                                                                                                                                                                                                                                                                                                                                                     | 0.04276  | -0.69320 |          |          |   |          |         |          |   |          |          |          |   |          |          |          |   |          |         |          |   |          |          |          |   |          |          |          |   |          |          |          |   |          |         |          |   |          |          |         |   |                                                                                                                                                                                                                                                                                                                                                                                                                                                                                                                                                                                                                                                                                                                                                                     |          |         |         |          |          |         |         |          |         |          |          |          |          |         |         |          |          |          |         |          |         |         |          |          |          |          |          |          |          |          |          |          |          |          |         |          |          |          |          |          |          |          |   |          |          |          |   |          |          |          |   |          |          |          |   |          |          |         |   |          |          |         |   |          |          |         |   |          |          |         |   |          |          |          |   |          |          |         |   |          |         |         |   |          |         |          |   |          |         |         |   |          |         |         |                                                                                                                                                                                                                       |                                                                                                                                                                                                                                                                                                                                                                                                                                                                                                                                                                                                                                                                                                                                                                                                                                                                                                                                                                                                                                                                                                                                                                                                                                                                                                                                                                                                                                                                                                                                                                                                                                                                                                                                                                                                                                                                                                                                                                                                                                                                                                                                                                                                                                                                                                                                                                                                                                                                                                         |         |          |         |          |          |         |         |          |         |          |          |          |         |          |                                                                                                                                                                                                                        |                                                                                                                                                                                                                                                                                                                                                                                                                                                                                                                                                                                                                                                                                                                                                                                                                                                                                                                                                                                                                                                                                                                                                                                                                                                                                                                                                                                                                                                                                                                                                                                                                                                                                                                                                                                                                                                                                                                                                                                                                                                                                                                                                                                                                                                                                                                                                                                                                                                                                                                                                                                                                                                                                                                                                                                                |   |          |          |          |   |         |          |          |   |          |          |          |   |          |          |          |   |          |          |         |   |          |          |         |   |          |          |          |   |          |          |          |   |          |          |          |   |         |          |         |   |          |          |         |   |          |         |          |   |          |          |          |   |          |         |          |   |          |          |         |   |          |          |          |   |          |          |         |   |          |         |          |   |          |          |          |   |          |         |          |   |          |          |          |   |          |          |          |   |          |          |          |   |          |          |          |   |          |         |         |   |          |         |         |   |         |          |          |   |          |          |          |   |          |          |          |   |          |          |          |   |          |          |         |   |          |          |         |   |         |         |          |   |         |         |          |   |         |         |          |   |         |         |          |   |          |         |          |   |          |          |         |
| C                                                                                                                                                                                                                     | -1.00428                                                                                                                                                                                                                                                                                                                                                                                                                                                                                                                                                                                                                                                                                                                                                                                                                                                                                                                                                                                                                                                                                                                                                                                                                                                                                                                                                                                                                                                                                                                                                                                                                                                                                                                                                                                                                                                                                                                                                                                                                                                                                                                                                                                                                                                                                                                                                                                                                                                                                                                                                                                                                                                                                                                                                                                     | -1.70126 | -2.30219 |          |          |   |          |         |          |   |          |          |          |   |          |          |          |   |          |         |          |   |          |          |          |   |          |          |          |   |          |          |          |   |          |         |          |   |          |          |         |   |                                                                                                                                                                                                                                                                                                                                                                                                                                                                                                                                                                                                                                                                                                                                                                     |          |         |         |          |          |         |         |          |         |          |          |          |          |         |         |          |          |          |         |          |         |         |          |          |          |          |          |          |          |          |          |          |          |          |         |          |          |          |          |          |          |          |   |          |          |          |   |          |          |          |   |          |          |          |   |          |          |         |   |          |          |         |   |          |          |         |   |          |          |         |   |          |          |          |   |          |          |         |   |          |         |         |   |          |         |          |   |          |         |         |   |          |         |         |                                                                                                                                                                                                                       |                                                                                                                                                                                                                                                                                                                                                                                                                                                                                                                                                                                                                                                                                                                                                                                                                                                                                                                                                                                                                                                                                                                                                                                                                                                                                                                                                                                                                                                                                                                                                                                                                                                                                                                                                                                                                                                                                                                                                                                                                                                                                                                                                                                                                                                                                                                                                                                                                                                                                                         |         |          |         |          |          |         |         |          |         |          |          |          |         |          |                                                                                                                                                                                                                        |                                                                                                                                                                                                                                                                                                                                                                                                                                                                                                                                                                                                                                                                                                                                                                                                                                                                                                                                                                                                                                                                                                                                                                                                                                                                                                                                                                                                                                                                                                                                                                                                                                                                                                                                                                                                                                                                                                                                                                                                                                                                                                                                                                                                                                                                                                                                                                                                                                                                                                                                                                                                                                                                                                                                                                                                |   |          |          |          |   |         |          |          |   |          |          |          |   |          |          |          |   |          |          |         |   |          |          |         |   |          |          |          |   |          |          |          |   |          |          |          |   |         |          |         |   |          |          |         |   |          |         |          |   |          |          |          |   |          |         |          |   |          |          |         |   |          |          |          |   |          |          |         |   |          |         |          |   |          |          |          |   |          |         |          |   |          |          |          |   |          |          |          |   |          |          |          |   |          |          |          |   |          |         |         |   |          |         |         |   |         |          |          |   |          |          |          |   |          |          |          |   |          |          |          |   |          |          |         |   |          |          |         |   |         |         |          |   |         |         |          |   |         |         |          |   |         |         |          |   |          |         |          |   |          |          |         |
| C                                                                                                                                                                                                                     | -1.12963                                                                                                                                                                                                                                                                                                                                                                                                                                                                                                                                                                                                                                                                                                                                                                                                                                                                                                                                                                                                                                                                                                                                                                                                                                                                                                                                                                                                                                                                                                                                                                                                                                                                                                                                                                                                                                                                                                                                                                                                                                                                                                                                                                                                                                                                                                                                                                                                                                                                                                                                                                                                                                                                                                                                                                                     | 0.60940  | -2.96714 |          |          |   |          |         |          |   |          |          |          |   |          |          |          |   |          |         |          |   |          |          |          |   |          |          |          |   |          |          |          |   |          |         |          |   |          |          |         |   |                                                                                                                                                                                                                                                                                                                                                                                                                                                                                                                                                                                                                                                                                                                                                                     |          |         |         |          |          |         |         |          |         |          |          |          |          |         |         |          |          |          |         |          |         |         |          |          |          |          |          |          |          |          |          |          |          |          |         |          |          |          |          |          |          |          |   |          |          |          |   |          |          |          |   |          |          |          |   |          |          |         |   |          |          |         |   |          |          |         |   |          |          |         |   |          |          |          |   |          |          |         |   |          |         |         |   |          |         |          |   |          |         |         |   |          |         |         |                                                                                                                                                                                                                       |                                                                                                                                                                                                                                                                                                                                                                                                                                                                                                                                                                                                                                                                                                                                                                                                                                                                                                                                                                                                                                                                                                                                                                                                                                                                                                                                                                                                                                                                                                                                                                                                                                                                                                                                                                                                                                                                                                                                                                                                                                                                                                                                                                                                                                                                                                                                                                                                                                                                                                         |         |          |         |          |          |         |         |          |         |          |          |          |         |          |                                                                                                                                                                                                                        |                                                                                                                                                                                                                                                                                                                                                                                                                                                                                                                                                                                                                                                                                                                                                                                                                                                                                                                                                                                                                                                                                                                                                                                                                                                                                                                                                                                                                                                                                                                                                                                                                                                                                                                                                                                                                                                                                                                                                                                                                                                                                                                                                                                                                                                                                                                                                                                                                                                                                                                                                                                                                                                                                                                                                                                                |   |          |          |          |   |         |          |          |   |          |          |          |   |          |          |          |   |          |          |         |   |          |          |         |   |          |          |          |   |          |          |          |   |          |          |          |   |         |          |         |   |          |          |         |   |          |         |          |   |          |          |          |   |          |         |          |   |          |          |         |   |          |          |          |   |          |          |         |   |          |         |          |   |          |          |          |   |          |         |          |   |          |          |          |   |          |          |          |   |          |          |          |   |          |          |          |   |          |         |         |   |          |         |         |   |         |          |          |   |          |          |          |   |          |          |          |   |          |          |          |   |          |          |         |   |          |          |         |   |         |         |          |   |         |         |          |   |         |         |          |   |         |         |          |   |          |         |          |   |          |          |         |
| C                                                                                                                                                                                                                     | -0.74455                                                                                                                                                                                                                                                                                                                                                                                                                                                                                                                                                                                                                                                                                                                                                                                                                                                                                                                                                                                                                                                                                                                                                                                                                                                                                                                                                                                                                                                                                                                                                                                                                                                                                                                                                                                                                                                                                                                                                                                                                                                                                                                                                                                                                                                                                                                                                                                                                                                                                                                                                                                                                                                                                                                                                                                     | 0.99906  | -1.68867 |          |          |   |          |         |          |   |          |          |          |   |          |          |          |   |          |         |          |   |          |          |          |   |          |          |          |   |          |          |          |   |          |         |          |   |          |          |         |   |                                                                                                                                                                                                                                                                                                                                                                                                                                                                                                                                                                                                                                                                                                                                                                     |          |         |         |          |          |         |         |          |         |          |          |          |          |         |         |          |          |          |         |          |         |         |          |          |          |          |          |          |          |          |          |          |          |          |         |          |          |          |          |          |          |          |   |          |          |          |   |          |          |          |   |          |          |          |   |          |          |         |   |          |          |         |   |          |          |         |   |          |          |         |   |          |          |          |   |          |          |         |   |          |         |         |   |          |         |          |   |          |         |         |   |          |         |         |                                                                                                                                                                                                                       |                                                                                                                                                                                                                                                                                                                                                                                                                                                                                                                                                                                                                                                                                                                                                                                                                                                                                                                                                                                                                                                                                                                                                                                                                                                                                                                                                                                                                                                                                                                                                                                                                                                                                                                                                                                                                                                                                                                                                                                                                                                                                                                                                                                                                                                                                                                                                                                                                                                                                                         |         |          |         |          |          |         |         |          |         |          |          |          |         |          |                                                                                                                                                                                                                        |                                                                                                                                                                                                                                                                                                                                                                                                                                                                                                                                                                                                                                                                                                                                                                                                                                                                                                                                                                                                                                                                                                                                                                                                                                                                                                                                                                                                                                                                                                                                                                                                                                                                                                                                                                                                                                                                                                                                                                                                                                                                                                                                                                                                                                                                                                                                                                                                                                                                                                                                                                                                                                                                                                                                                                                                |   |          |          |          |   |         |          |          |   |          |          |          |   |          |          |          |   |          |          |         |   |          |          |         |   |          |          |          |   |          |          |          |   |          |          |          |   |         |          |         |   |          |          |         |   |          |         |          |   |          |          |          |   |          |         |          |   |          |          |         |   |          |          |          |   |          |          |         |   |          |         |          |   |          |          |          |   |          |         |          |   |          |          |          |   |          |          |          |   |          |          |          |   |          |          |          |   |          |         |         |   |          |         |         |   |         |          |          |   |          |          |          |   |          |          |          |   |          |          |          |   |          |          |         |   |          |          |         |   |         |         |          |   |         |         |          |   |         |         |          |   |         |         |          |   |          |         |          |   |          |          |         |
| C                                                                                                                                                                                                                     | -0.62870                                                                                                                                                                                                                                                                                                                                                                                                                                                                                                                                                                                                                                                                                                                                                                                                                                                                                                                                                                                                                                                                                                                                                                                                                                                                                                                                                                                                                                                                                                                                                                                                                                                                                                                                                                                                                                                                                                                                                                                                                                                                                                                                                                                                                                                                                                                                                                                                                                                                                                                                                                                                                                                                                                                                                                                     | -1.31144 | -1.00862 |          |          |   |          |         |          |   |          |          |          |   |          |          |          |   |          |         |          |   |          |          |          |   |          |          |          |   |          |          |          |   |          |         |          |   |          |          |         |   |                                                                                                                                                                                                                                                                                                                                                                                                                                                                                                                                                                                                                                                                                                                                                                     |          |         |         |          |          |         |         |          |         |          |          |          |          |         |         |          |          |          |         |          |         |         |          |          |          |          |          |          |          |          |          |          |          |          |         |          |          |          |          |          |          |          |   |          |          |          |   |          |          |          |   |          |          |          |   |          |          |         |   |          |          |         |   |          |          |         |   |          |          |         |   |          |          |          |   |          |          |         |   |          |         |         |   |          |         |          |   |          |         |         |   |          |         |         |                                                                                                                                                                                                                       |                                                                                                                                                                                                                                                                                                                                                                                                                                                                                                                                                                                                                                                                                                                                                                                                                                                                                                                                                                                                                                                                                                                                                                                                                                                                                                                                                                                                                                                                                                                                                                                                                                                                                                                                                                                                                                                                                                                                                                                                                                                                                                                                                                                                                                                                                                                                                                                                                                                                                                         |         |          |         |          |          |         |         |          |         |          |          |          |         |          |                                                                                                                                                                                                                        |                                                                                                                                                                                                                                                                                                                                                                                                                                                                                                                                                                                                                                                                                                                                                                                                                                                                                                                                                                                                                                                                                                                                                                                                                                                                                                                                                                                                                                                                                                                                                                                                                                                                                                                                                                                                                                                                                                                                                                                                                                                                                                                                                                                                                                                                                                                                                                                                                                                                                                                                                                                                                                                                                                                                                                                                |   |          |          |          |   |         |          |          |   |          |          |          |   |          |          |          |   |          |          |         |   |          |          |         |   |          |          |          |   |          |          |          |   |          |          |          |   |         |          |         |   |          |          |         |   |          |         |          |   |          |          |          |   |          |         |          |   |          |          |         |   |          |          |          |   |          |          |         |   |          |         |          |   |          |          |          |   |          |         |          |   |          |          |          |   |          |          |          |   |          |          |          |   |          |          |          |   |          |         |         |   |          |         |         |   |         |          |          |   |          |          |          |   |          |          |          |   |          |          |          |   |          |          |         |   |          |          |         |   |         |         |          |   |         |         |          |   |         |         |          |   |         |         |          |   |          |         |          |   |          |          |         |
| C                                                                                                                                                                                                                     | -0.08323                                                                                                                                                                                                                                                                                                                                                                                                                                                                                                                                                                                                                                                                                                                                                                                                                                                                                                                                                                                                                                                                                                                                                                                                                                                                                                                                                                                                                                                                                                                                                                                                                                                                                                                                                                                                                                                                                                                                                                                                                                                                                                                                                                                                                                                                                                                                                                                                                                                                                                                                                                                                                                                                                                                                                                                     | 0.53515  | 0.65351  |          |          |   |          |         |          |   |          |          |          |   |          |          |          |   |          |         |          |   |          |          |          |   |          |          |          |   |          |          |          |   |          |         |          |   |          |          |         |   |                                                                                                                                                                                                                                                                                                                                                                                                                                                                                                                                                                                                                                                                                                                                                                     |          |         |         |          |          |         |         |          |         |          |          |          |          |         |         |          |          |          |         |          |         |         |          |          |          |          |          |          |          |          |          |          |          |          |         |          |          |          |          |          |          |          |   |          |          |          |   |          |          |          |   |          |          |          |   |          |          |         |   |          |          |         |   |          |          |         |   |          |          |         |   |          |          |          |   |          |          |         |   |          |         |         |   |          |         |          |   |          |         |         |   |          |         |         |                                                                                                                                                                                                                       |                                                                                                                                                                                                                                                                                                                                                                                                                                                                                                                                                                                                                                                                                                                                                                                                                                                                                                                                                                                                                                                                                                                                                                                                                                                                                                                                                                                                                                                                                                                                                                                                                                                                                                                                                                                                                                                                                                                                                                                                                                                                                                                                                                                                                                                                                                                                                                                                                                                                                                         |         |          |         |          |          |         |         |          |         |          |          |          |         |          |                                                                                                                                                                                                                        |                                                                                                                                                                                                                                                                                                                                                                                                                                                                                                                                                                                                                                                                                                                                                                                                                                                                                                                                                                                                                                                                                                                                                                                                                                                                                                                                                                                                                                                                                                                                                                                                                                                                                                                                                                                                                                                                                                                                                                                                                                                                                                                                                                                                                                                                                                                                                                                                                                                                                                                                                                                                                                                                                                                                                                                                |   |          |          |          |   |         |          |          |   |          |          |          |   |          |          |          |   |          |          |         |   |          |          |         |   |          |          |          |   |          |          |          |   |          |          |          |   |         |          |         |   |          |          |         |   |          |         |          |   |          |          |          |   |          |         |          |   |          |          |         |   |          |          |          |   |          |          |         |   |          |         |          |   |          |          |          |   |          |         |          |   |          |          |          |   |          |          |          |   |          |          |          |   |          |          |          |   |          |         |         |   |          |         |         |   |         |          |          |   |          |          |          |   |          |          |          |   |          |          |          |   |          |          |         |   |          |          |         |   |         |         |          |   |         |         |          |   |         |         |          |   |         |         |          |   |          |         |          |   |          |          |         |
| C                                                                                                                                                                                                                     | 0.53668                                                                                                                                                                                                                                                                                                                                                                                                                                                                                                                                                                                                                                                                                                                                                                                                                                                                                                                                                                                                                                                                                                                                                                                                                                                                                                                                                                                                                                                                                                                                                                                                                                                                                                                                                                                                                                                                                                                                                                                                                                                                                                                                                                                                                                                                                                                                                                                                                                                                                                                                                                                                                                                                                                                                                                                      | 1.47215  | 3.21640  |          |          |   |          |         |          |   |          |          |          |   |          |          |          |   |          |         |          |   |          |          |          |   |          |          |          |   |          |          |          |   |          |         |          |   |          |          |         |   |                                                                                                                                                                                                                                                                                                                                                                                                                                                                                                                                                                                                                                                                                                                                                                     |          |         |         |          |          |         |         |          |         |          |          |          |          |         |         |          |          |          |         |          |         |         |          |          |          |          |          |          |          |          |          |          |          |          |         |          |          |          |          |          |          |          |   |          |          |          |   |          |          |          |   |          |          |          |   |          |          |         |   |          |          |         |   |          |          |         |   |          |          |         |   |          |          |          |   |          |          |         |   |          |         |         |   |          |         |          |   |          |         |         |   |          |         |         |                                                                                                                                                                                                                       |                                                                                                                                                                                                                                                                                                                                                                                                                                                                                                                                                                                                                                                                                                                                                                                                                                                                                                                                                                                                                                                                                                                                                                                                                                                                                                                                                                                                                                                                                                                                                                                                                                                                                                                                                                                                                                                                                                                                                                                                                                                                                                                                                                                                                                                                                                                                                                                                                                                                                                         |         |          |         |          |          |         |         |          |         |          |          |          |         |          |                                                                                                                                                                                                                        |                                                                                                                                                                                                                                                                                                                                                                                                                                                                                                                                                                                                                                                                                                                                                                                                                                                                                                                                                                                                                                                                                                                                                                                                                                                                                                                                                                                                                                                                                                                                                                                                                                                                                                                                                                                                                                                                                                                                                                                                                                                                                                                                                                                                                                                                                                                                                                                                                                                                                                                                                                                                                                                                                                                                                                                                |   |          |          |          |   |         |          |          |   |          |          |          |   |          |          |          |   |          |          |         |   |          |          |         |   |          |          |          |   |          |          |          |   |          |          |          |   |         |          |         |   |          |          |         |   |          |         |          |   |          |          |          |   |          |         |          |   |          |          |         |   |          |          |          |   |          |          |         |   |          |         |          |   |          |          |          |   |          |         |          |   |          |          |          |   |          |          |          |   |          |          |          |   |          |          |          |   |          |         |         |   |          |         |         |   |         |          |          |   |          |          |          |   |          |          |          |   |          |          |          |   |          |          |         |   |          |          |         |   |         |         |          |   |         |         |          |   |         |         |          |   |         |         |          |   |          |         |          |   |          |          |         |
| C                                                                                                                                                                                                                     | 1.24800                                                                                                                                                                                                                                                                                                                                                                                                                                                                                                                                                                                                                                                                                                                                                                                                                                                                                                                                                                                                                                                                                                                                                                                                                                                                                                                                                                                                                                                                                                                                                                                                                                                                                                                                                                                                                                                                                                                                                                                                                                                                                                                                                                                                                                                                                                                                                                                                                                                                                                                                                                                                                                                                                                                                                                                      | 0.68520  | 1.05152  |          |          |   |          |         |          |   |          |          |          |   |          |          |          |   |          |         |          |   |          |          |          |   |          |          |          |   |          |          |          |   |          |         |          |   |          |          |         |   |                                                                                                                                                                                                                                                                                                                                                                                                                                                                                                                                                                                                                                                                                                                                                                     |          |         |         |          |          |         |         |          |         |          |          |          |          |         |         |          |          |          |         |          |         |         |          |          |          |          |          |          |          |          |          |          |          |          |         |          |          |          |          |          |          |          |   |          |          |          |   |          |          |          |   |          |          |          |   |          |          |         |   |          |          |         |   |          |          |         |   |          |          |         |   |          |          |          |   |          |          |         |   |          |         |         |   |          |         |          |   |          |         |         |   |          |         |         |                                                                                                                                                                                                                       |                                                                                                                                                                                                                                                                                                                                                                                                                                                                                                                                                                                                                                                                                                                                                                                                                                                                                                                                                                                                                                                                                                                                                                                                                                                                                                                                                                                                                                                                                                                                                                                                                                                                                                                                                                                                                                                                                                                                                                                                                                                                                                                                                                                                                                                                                                                                                                                                                                                                                                         |         |          |         |          |          |         |         |          |         |          |          |          |         |          |                                                                                                                                                                                                                        |                                                                                                                                                                                                                                                                                                                                                                                                                                                                                                                                                                                                                                                                                                                                                                                                                                                                                                                                                                                                                                                                                                                                                                                                                                                                                                                                                                                                                                                                                                                                                                                                                                                                                                                                                                                                                                                                                                                                                                                                                                                                                                                                                                                                                                                                                                                                                                                                                                                                                                                                                                                                                                                                                                                                                                                                |   |          |          |          |   |         |          |          |   |          |          |          |   |          |          |          |   |          |          |         |   |          |          |         |   |          |          |          |   |          |          |          |   |          |          |          |   |         |          |         |   |          |          |         |   |          |         |          |   |          |          |          |   |          |         |          |   |          |          |         |   |          |          |          |   |          |          |         |   |          |         |          |   |          |          |          |   |          |         |          |   |          |          |          |   |          |          |          |   |          |          |          |   |          |          |          |   |          |         |         |   |          |         |         |   |         |          |          |   |          |          |          |   |          |          |          |   |          |          |          |   |          |          |         |   |          |          |         |   |         |         |          |   |         |         |          |   |         |         |          |   |         |         |          |   |          |         |          |   |          |          |         |
| C                                                                                                                                                                                                                     | -1.10178                                                                                                                                                                                                                                                                                                                                                                                                                                                                                                                                                                                                                                                                                                                                                                                                                                                                                                                                                                                                                                                                                                                                                                                                                                                                                                                                                                                                                                                                                                                                                                                                                                                                                                                                                                                                                                                                                                                                                                                                                                                                                                                                                                                                                                                                                                                                                                                                                                                                                                                                                                                                                                                                                                                                                                                     | 0.86821  | 1.56071  |          |          |   |          |         |          |   |          |          |          |   |          |          |          |   |          |         |          |   |          |          |          |   |          |          |          |   |          |          |          |   |          |         |          |   |          |          |         |   |                                                                                                                                                                                                                                                                                                                                                                                                                                                                                                                                                                                                                                                                                                                                                                     |          |         |         |          |          |         |         |          |         |          |          |          |          |         |         |          |          |          |         |          |         |         |          |          |          |          |          |          |          |          |          |          |          |          |         |          |          |          |          |          |          |          |   |          |          |          |   |          |          |          |   |          |          |          |   |          |          |         |   |          |          |         |   |          |          |         |   |          |          |         |   |          |          |          |   |          |          |         |   |          |         |         |   |          |         |          |   |          |         |         |   |          |         |         |                                                                                                                                                                                                                       |                                                                                                                                                                                                                                                                                                                                                                                                                                                                                                                                                                                                                                                                                                                                                                                                                                                                                                                                                                                                                                                                                                                                                                                                                                                                                                                                                                                                                                                                                                                                                                                                                                                                                                                                                                                                                                                                                                                                                                                                                                                                                                                                                                                                                                                                                                                                                                                                                                                                                                         |         |          |         |          |          |         |         |          |         |          |          |          |         |          |                                                                                                                                                                                                                        |                                                                                                                                                                                                                                                                                                                                                                                                                                                                                                                                                                                                                                                                                                                                                                                                                                                                                                                                                                                                                                                                                                                                                                                                                                                                                                                                                                                                                                                                                                                                                                                                                                                                                                                                                                                                                                                                                                                                                                                                                                                                                                                                                                                                                                                                                                                                                                                                                                                                                                                                                                                                                                                                                                                                                                                                |   |          |          |          |   |         |          |          |   |          |          |          |   |          |          |          |   |          |          |         |   |          |          |         |   |          |          |          |   |          |          |          |   |          |          |          |   |         |          |         |   |          |          |         |   |          |         |          |   |          |          |          |   |          |         |          |   |          |          |         |   |          |          |          |   |          |          |         |   |          |         |          |   |          |          |          |   |          |         |          |   |          |          |          |   |          |          |          |   |          |          |          |   |          |          |          |   |          |         |         |   |          |         |         |   |         |          |          |   |          |          |          |   |          |          |          |   |          |          |          |   |          |          |         |   |          |          |         |   |         |         |          |   |         |         |          |   |         |         |          |   |         |         |          |   |          |         |          |   |          |          |         |
| C                                                                                                                                                                                                                     | 3.47264                                                                                                                                                                                                                                                                                                                                                                                                                                                                                                                                                                                                                                                                                                                                                                                                                                                                                                                                                                                                                                                                                                                                                                                                                                                                                                                                                                                                                                                                                                                                                                                                                                                                                                                                                                                                                                                                                                                                                                                                                                                                                                                                                                                                                                                                                                                                                                                                                                                                                                                                                                                                                                                                                                                                                                                      | 0.72827  | -0.55732 |          |          |   |          |         |          |   |          |          |          |   |          |          |          |   |          |         |          |   |          |          |          |   |          |          |          |   |          |          |          |   |          |         |          |   |          |          |         |   |                                                                                                                                                                                                                                                                                                                                                                                                                                                                                                                                                                                                                                                                                                                                                                     |          |         |         |          |          |         |         |          |         |          |          |          |          |         |         |          |          |          |         |          |         |         |          |          |          |          |          |          |          |          |          |          |          |          |         |          |          |          |          |          |          |          |   |          |          |          |   |          |          |          |   |          |          |          |   |          |          |         |   |          |          |         |   |          |          |         |   |          |          |         |   |          |          |          |   |          |          |         |   |          |         |         |   |          |         |          |   |          |         |         |   |          |         |         |                                                                                                                                                                                                                       |                                                                                                                                                                                                                                                                                                                                                                                                                                                                                                                                                                                                                                                                                                                                                                                                                                                                                                                                                                                                                                                                                                                                                                                                                                                                                                                                                                                                                                                                                                                                                                                                                                                                                                                                                                                                                                                                                                                                                                                                                                                                                                                                                                                                                                                                                                                                                                                                                                                                                                         |         |          |         |          |          |         |         |          |         |          |          |          |         |          |                                                                                                                                                                                                                        |                                                                                                                                                                                                                                                                                                                                                                                                                                                                                                                                                                                                                                                                                                                                                                                                                                                                                                                                                                                                                                                                                                                                                                                                                                                                                                                                                                                                                                                                                                                                                                                                                                                                                                                                                                                                                                                                                                                                                                                                                                                                                                                                                                                                                                                                                                                                                                                                                                                                                                                                                                                                                                                                                                                                                                                                |   |          |          |          |   |         |          |          |   |          |          |          |   |          |          |          |   |          |          |         |   |          |          |         |   |          |          |          |   |          |          |          |   |          |          |          |   |         |          |         |   |          |          |         |   |          |         |          |   |          |          |          |   |          |         |          |   |          |          |         |   |          |          |          |   |          |          |         |   |          |         |          |   |          |          |          |   |          |         |          |   |          |          |          |   |          |          |          |   |          |          |          |   |          |          |          |   |          |         |         |   |          |         |         |   |         |          |          |   |          |          |          |   |          |          |          |   |          |          |          |   |          |          |         |   |          |          |         |   |         |         |          |   |         |         |          |   |         |         |          |   |         |         |          |   |          |         |          |   |          |          |         |
| C                                                                                                                                                                                                                     | 0.72436                                                                                                                                                                                                                                                                                                                                                                                                                                                                                                                                                                                                                                                                                                                                                                                                                                                                                                                                                                                                                                                                                                                                                                                                                                                                                                                                                                                                                                                                                                                                                                                                                                                                                                                                                                                                                                                                                                                                                                                                                                                                                                                                                                                                                                                                                                                                                                                                                                                                                                                                                                                                                                                                                                                                                                                      | 0.17542  | -0.00764 |          |          |   |          |         |          |   |          |          |          |   |          |          |          |   |          |         |          |   |          |          |          |   |          |          |          |   |          |          |          |   |          |         |          |   |          |          |         |   |                                                                                                                                                                                                                                                                                                                                                                                                                                                                                                                                                                                                                                                                                                                                                                     |          |         |         |          |          |         |         |          |         |          |          |          |          |         |         |          |          |          |         |          |         |         |          |          |          |          |          |          |          |          |          |          |          |          |         |          |          |          |          |          |          |          |   |          |          |          |   |          |          |          |   |          |          |          |   |          |          |         |   |          |          |         |   |          |          |         |   |          |          |         |   |          |          |          |   |          |          |         |   |          |         |         |   |          |         |          |   |          |         |         |   |          |         |         |                                                                                                                                                                                                                       |                                                                                                                                                                                                                                                                                                                                                                                                                                                                                                                                                                                                                                                                                                                                                                                                                                                                                                                                                                                                                                                                                                                                                                                                                                                                                                                                                                                                                                                                                                                                                                                                                                                                                                                                                                                                                                                                                                                                                                                                                                                                                                                                                                                                                                                                                                                                                                                                                                                                                                         |         |          |         |          |          |         |         |          |         |          |          |          |         |          |                                                                                                                                                                                                                        |                                                                                                                                                                                                                                                                                                                                                                                                                                                                                                                                                                                                                                                                                                                                                                                                                                                                                                                                                                                                                                                                                                                                                                                                                                                                                                                                                                                                                                                                                                                                                                                                                                                                                                                                                                                                                                                                                                                                                                                                                                                                                                                                                                                                                                                                                                                                                                                                                                                                                                                                                                                                                                                                                                                                                                                                |   |          |          |          |   |         |          |          |   |          |          |          |   |          |          |          |   |          |          |         |   |          |          |         |   |          |          |          |   |          |          |          |   |          |          |          |   |         |          |         |   |          |          |         |   |          |         |          |   |          |          |          |   |          |         |          |   |          |          |         |   |          |          |          |   |          |          |         |   |          |         |          |   |          |          |          |   |          |         |          |   |          |          |          |   |          |          |          |   |          |          |          |   |          |          |          |   |          |         |         |   |          |         |         |   |         |          |          |   |          |          |          |   |          |          |          |   |          |          |          |   |          |          |         |   |          |          |         |   |         |         |          |   |         |         |          |   |         |         |          |   |         |         |          |   |          |         |          |   |          |          |         |
| C                                                                                                                                                                                                                     | 3.07721                                                                                                                                                                                                                                                                                                                                                                                                                                                                                                                                                                                                                                                                                                                                                                                                                                                                                                                                                                                                                                                                                                                                                                                                                                                                                                                                                                                                                                                                                                                                                                                                                                                                                                                                                                                                                                                                                                                                                                                                                                                                                                                                                                                                                                                                                                                                                                                                                                                                                                                                                                                                                                                                                                                                                                                      | -0.54382 | -0.18676 |          |          |   |          |         |          |   |          |          |          |   |          |          |          |   |          |         |          |   |          |          |          |   |          |          |          |   |          |          |          |   |          |         |          |   |          |          |         |   |                                                                                                                                                                                                                                                                                                                                                                                                                                                                                                                                                                                                                                                                                                                                                                     |          |         |         |          |          |         |         |          |         |          |          |          |          |         |         |          |          |          |         |          |         |         |          |          |          |          |          |          |          |          |          |          |          |          |         |          |          |          |          |          |          |          |   |          |          |          |   |          |          |          |   |          |          |          |   |          |          |         |   |          |          |         |   |          |          |         |   |          |          |         |   |          |          |          |   |          |          |         |   |          |         |         |   |          |         |          |   |          |         |         |   |          |         |         |                                                                                                                                                                                                                       |                                                                                                                                                                                                                                                                                                                                                                                                                                                                                                                                                                                                                                                                                                                                                                                                                                                                                                                                                                                                                                                                                                                                                                                                                                                                                                                                                                                                                                                                                                                                                                                                                                                                                                                                                                                                                                                                                                                                                                                                                                                                                                                                                                                                                                                                                                                                                                                                                                                                                                         |         |          |         |          |          |         |         |          |         |          |          |          |         |          |                                                                                                                                                                                                                        |                                                                                                                                                                                                                                                                                                                                                                                                                                                                                                                                                                                                                                                                                                                                                                                                                                                                                                                                                                                                                                                                                                                                                                                                                                                                                                                                                                                                                                                                                                                                                                                                                                                                                                                                                                                                                                                                                                                                                                                                                                                                                                                                                                                                                                                                                                                                                                                                                                                                                                                                                                                                                                                                                                                                                                                                |   |          |          |          |   |         |          |          |   |          |          |          |   |          |          |          |   |          |          |         |   |          |          |         |   |          |          |          |   |          |          |          |   |          |          |          |   |         |          |         |   |          |          |         |   |          |         |          |   |          |          |          |   |          |         |          |   |          |          |         |   |          |          |          |   |          |          |         |   |          |         |          |   |          |          |          |   |          |         |          |   |          |          |          |   |          |          |          |   |          |          |          |   |          |          |          |   |          |         |         |   |          |         |         |   |         |          |          |   |          |          |          |   |          |          |          |   |          |          |          |   |          |          |         |   |          |          |         |   |         |         |          |   |         |         |          |   |         |         |          |   |         |         |          |   |          |         |          |   |          |          |         |
| C                                                                                                                                                                                                                     | 2.55878                                                                                                                                                                                                                                                                                                                                                                                                                                                                                                                                                                                                                                                                                                                                                                                                                                                                                                                                                                                                                                                                                                                                                                                                                                                                                                                                                                                                                                                                                                                                                                                                                                                                                                                                                                                                                                                                                                                                                                                                                                                                                                                                                                                                                                                                                                                                                                                                                                                                                                                                                                                                                                                                                                                                                                                      | 1.76311  | -0.44737 |          |          |   |          |         |          |   |          |          |          |   |          |          |          |   |          |         |          |   |          |          |          |   |          |          |          |   |          |          |          |   |          |         |          |   |          |          |         |   |                                                                                                                                                                                                                                                                                                                                                                                                                                                                                                                                                                                                                                                                                                                                                                     |          |         |         |          |          |         |         |          |         |          |          |          |          |         |         |          |          |          |         |          |         |         |          |          |          |          |          |          |          |          |          |          |          |          |         |          |          |          |          |          |          |          |   |          |          |          |   |          |          |          |   |          |          |          |   |          |          |         |   |          |          |         |   |          |          |         |   |          |          |         |   |          |          |          |   |          |          |         |   |          |         |         |   |          |         |          |   |          |         |         |   |          |         |         |                                                                                                                                                                                                                       |                                                                                                                                                                                                                                                                                                                                                                                                                                                                                                                                                                                                                                                                                                                                                                                                                                                                                                                                                                                                                                                                                                                                                                                                                                                                                                                                                                                                                                                                                                                                                                                                                                                                                                                                                                                                                                                                                                                                                                                                                                                                                                                                                                                                                                                                                                                                                                                                                                                                                                         |         |          |         |          |          |         |         |          |         |          |          |          |         |          |                                                                                                                                                                                                                        |                                                                                                                                                                                                                                                                                                                                                                                                                                                                                                                                                                                                                                                                                                                                                                                                                                                                                                                                                                                                                                                                                                                                                                                                                                                                                                                                                                                                                                                                                                                                                                                                                                                                                                                                                                                                                                                                                                                                                                                                                                                                                                                                                                                                                                                                                                                                                                                                                                                                                                                                                                                                                                                                                                                                                                                                |   |          |          |          |   |         |          |          |   |          |          |          |   |          |          |          |   |          |          |         |   |          |          |         |   |          |          |          |   |          |          |          |   |          |          |          |   |         |          |         |   |          |          |         |   |          |         |          |   |          |          |          |   |          |         |          |   |          |          |         |   |          |          |          |   |          |          |         |   |          |         |          |   |          |          |          |   |          |         |          |   |          |          |          |   |          |          |          |   |          |          |          |   |          |          |          |   |          |         |         |   |          |         |         |   |         |          |          |   |          |          |          |   |          |          |          |   |          |          |          |   |          |          |         |   |          |          |         |   |         |         |          |   |         |         |          |   |         |         |          |   |         |         |          |   |          |         |          |   |          |          |         |
| C                                                                                                                                                                                                                     | 1.22734                                                                                                                                                                                                                                                                                                                                                                                                                                                                                                                                                                                                                                                                                                                                                                                                                                                                                                                                                                                                                                                                                                                                                                                                                                                                                                                                                                                                                                                                                                                                                                                                                                                                                                                                                                                                                                                                                                                                                                                                                                                                                                                                                                                                                                                                                                                                                                                                                                                                                                                                                                                                                                                                                                                                                                                      | 1.50642  | -0.12212 |          |          |   |          |         |          |   |          |          |          |   |          |          |          |   |          |         |          |   |          |          |          |   |          |          |          |   |          |          |          |   |          |         |          |   |          |          |         |   |                                                                                                                                                                                                                                                                                                                                                                                                                                                                                                                                                                                                                                                                                                                                                                     |          |         |         |          |          |         |         |          |         |          |          |          |          |         |         |          |          |          |         |          |         |         |          |          |          |          |          |          |          |          |          |          |          |          |         |          |          |          |          |          |          |          |   |          |          |          |   |          |          |          |   |          |          |          |   |          |          |         |   |          |          |         |   |          |          |         |   |          |          |         |   |          |          |          |   |          |          |         |   |          |         |         |   |          |         |          |   |          |         |         |   |          |         |         |                                                                                                                                                                                                                       |                                                                                                                                                                                                                                                                                                                                                                                                                                                                                                                                                                                                                                                                                                                                                                                                                                                                                                                                                                                                                                                                                                                                                                                                                                                                                                                                                                                                                                                                                                                                                                                                                                                                                                                                                                                                                                                                                                                                                                                                                                                                                                                                                                                                                                                                                                                                                                                                                                                                                                         |         |          |         |          |          |         |         |          |         |          |          |          |         |          |                                                                                                                                                                                                                        |                                                                                                                                                                                                                                                                                                                                                                                                                                                                                                                                                                                                                                                                                                                                                                                                                                                                                                                                                                                                                                                                                                                                                                                                                                                                                                                                                                                                                                                                                                                                                                                                                                                                                                                                                                                                                                                                                                                                                                                                                                                                                                                                                                                                                                                                                                                                                                                                                                                                                                                                                                                                                                                                                                                                                                                                |   |          |          |          |   |         |          |          |   |          |          |          |   |          |          |          |   |          |          |         |   |          |          |         |   |          |          |          |   |          |          |          |   |          |          |          |   |         |          |         |   |          |          |         |   |          |         |          |   |          |          |          |   |          |         |          |   |          |          |         |   |          |          |          |   |          |          |         |   |          |         |          |   |          |          |          |   |          |         |          |   |          |          |          |   |          |          |          |   |          |          |          |   |          |          |          |   |          |         |         |   |          |         |         |   |         |          |          |   |          |          |          |   |          |          |          |   |          |          |          |   |          |          |         |   |          |          |         |   |         |         |          |   |         |         |          |   |         |         |          |   |         |         |          |   |          |         |          |   |          |          |         |
| C                                                                                                                                                                                                                     | 1.74994                                                                                                                                                                                                                                                                                                                                                                                                                                                                                                                                                                                                                                                                                                                                                                                                                                                                                                                                                                                                                                                                                                                                                                                                                                                                                                                                                                                                                                                                                                                                                                                                                                                                                                                                                                                                                                                                                                                                                                                                                                                                                                                                                                                                                                                                                                                                                                                                                                                                                                                                                                                                                                                                                                                                                                                      | -0.79746 | 0.16371  |          |          |   |          |         |          |   |          |          |          |   |          |          |          |   |          |         |          |   |          |          |          |   |          |          |          |   |          |          |          |   |          |         |          |   |          |          |         |   |                                                                                                                                                                                                                                                                                                                                                                                                                                                                                                                                                                                                                                                                                                                                                                     |          |         |         |          |          |         |         |          |         |          |          |          |          |         |         |          |          |          |         |          |         |         |          |          |          |          |          |          |          |          |          |          |          |          |         |          |          |          |          |          |          |          |   |          |          |          |   |          |          |          |   |          |          |          |   |          |          |         |   |          |          |         |   |          |          |         |   |          |          |         |   |          |          |          |   |          |          |         |   |          |         |         |   |          |         |          |   |          |         |         |   |          |         |         |                                                                                                                                                                                                                       |                                                                                                                                                                                                                                                                                                                                                                                                                                                                                                                                                                                                                                                                                                                                                                                                                                                                                                                                                                                                                                                                                                                                                                                                                                                                                                                                                                                                                                                                                                                                                                                                                                                                                                                                                                                                                                                                                                                                                                                                                                                                                                                                                                                                                                                                                                                                                                                                                                                                                                         |         |          |         |          |          |         |         |          |         |          |          |          |         |          |                                                                                                                                                                                                                        |                                                                                                                                                                                                                                                                                                                                                                                                                                                                                                                                                                                                                                                                                                                                                                                                                                                                                                                                                                                                                                                                                                                                                                                                                                                                                                                                                                                                                                                                                                                                                                                                                                                                                                                                                                                                                                                                                                                                                                                                                                                                                                                                                                                                                                                                                                                                                                                                                                                                                                                                                                                                                                                                                                                                                                                                |   |          |          |          |   |         |          |          |   |          |          |          |   |          |          |          |   |          |          |         |   |          |          |         |   |          |          |          |   |          |          |          |   |          |          |          |   |         |          |         |   |          |          |         |   |          |         |          |   |          |          |          |   |          |         |          |   |          |          |         |   |          |          |          |   |          |          |         |   |          |         |          |   |          |          |          |   |          |         |          |   |          |          |          |   |          |          |          |   |          |          |          |   |          |          |          |   |          |         |         |   |          |         |         |   |         |          |          |   |          |          |          |   |          |          |          |   |          |          |          |   |          |          |         |   |          |          |         |   |         |         |          |   |         |         |          |   |         |         |          |   |         |         |          |   |          |         |          |   |          |          |         |
| C                                                                                                                                                                                                                     | -0.72421                                                                                                                                                                                                                                                                                                                                                                                                                                                                                                                                                                                                                                                                                                                                                                                                                                                                                                                                                                                                                                                                                                                                                                                                                                                                                                                                                                                                                                                                                                                                                                                                                                                                                                                                                                                                                                                                                                                                                                                                                                                                                                                                                                                                                                                                                                                                                                                                                                                                                                                                                                                                                                                                                                                                                                                     | -0.17593 | 0.00665  |          |          |   |          |         |          |   |          |          |          |   |          |          |          |   |          |         |          |   |          |          |          |   |          |          |          |   |          |          |          |   |          |         |          |   |          |          |         |   |                                                                                                                                                                                                                                                                                                                                                                                                                                                                                                                                                                                                                                                                                                                                                                     |          |         |         |          |          |         |         |          |         |          |          |          |          |         |         |          |          |          |         |          |         |         |          |          |          |          |          |          |          |          |          |          |          |          |         |          |          |          |          |          |          |          |   |          |          |          |   |          |          |          |   |          |          |          |   |          |          |         |   |          |          |         |   |          |          |         |   |          |          |         |   |          |          |          |   |          |          |         |   |          |         |         |   |          |         |          |   |          |         |         |   |          |         |         |                                                                                                                                                                                                                       |                                                                                                                                                                                                                                                                                                                                                                                                                                                                                                                                                                                                                                                                                                                                                                                                                                                                                                                                                                                                                                                                                                                                                                                                                                                                                                                                                                                                                                                                                                                                                                                                                                                                                                                                                                                                                                                                                                                                                                                                                                                                                                                                                                                                                                                                                                                                                                                                                                                                                                         |         |          |         |          |          |         |         |          |         |          |          |          |         |          |                                                                                                                                                                                                                        |                                                                                                                                                                                                                                                                                                                                                                                                                                                                                                                                                                                                                                                                                                                                                                                                                                                                                                                                                                                                                                                                                                                                                                                                                                                                                                                                                                                                                                                                                                                                                                                                                                                                                                                                                                                                                                                                                                                                                                                                                                                                                                                                                                                                                                                                                                                                                                                                                                                                                                                                                                                                                                                                                                                                                                                                |   |          |          |          |   |         |          |          |   |          |          |          |   |          |          |          |   |          |          |         |   |          |          |         |   |          |          |          |   |          |          |          |   |          |          |          |   |         |          |         |   |          |          |         |   |          |         |          |   |          |          |          |   |          |         |          |   |          |          |         |   |          |          |          |   |          |          |         |   |          |         |          |   |          |          |          |   |          |         |          |   |          |          |          |   |          |          |          |   |          |          |          |   |          |          |          |   |          |         |         |   |          |         |         |   |         |          |          |   |          |          |          |   |          |          |          |   |          |          |          |   |          |          |         |   |          |          |         |   |         |         |          |   |         |         |          |   |         |         |          |   |         |         |          |   |          |         |          |   |          |          |         |
| C                                                                                                                                                                                                                     | -3.47290                                                                                                                                                                                                                                                                                                                                                                                                                                                                                                                                                                                                                                                                                                                                                                                                                                                                                                                                                                                                                                                                                                                                                                                                                                                                                                                                                                                                                                                                                                                                                                                                                                                                                                                                                                                                                                                                                                                                                                                                                                                                                                                                                                                                                                                                                                                                                                                                                                                                                                                                                                                                                                                                                                                                                                                     | -0.72862 | 0.55474  |          |          |   |          |         |          |   |          |          |          |   |          |          |          |   |          |         |          |   |          |          |          |   |          |          |          |   |          |          |          |   |          |         |          |   |          |          |         |   |                                                                                                                                                                                                                                                                                                                                                                                                                                                                                                                                                                                                                                                                                                                                                                     |          |         |         |          |          |         |         |          |         |          |          |          |          |         |         |          |          |          |         |          |         |         |          |          |          |          |          |          |          |          |          |          |          |          |         |          |          |          |          |          |          |          |   |          |          |          |   |          |          |          |   |          |          |          |   |          |          |         |   |          |          |         |   |          |          |         |   |          |          |         |   |          |          |          |   |          |          |         |   |          |         |         |   |          |         |          |   |          |         |         |   |          |         |         |                                                                                                                                                                                                                       |                                                                                                                                                                                                                                                                                                                                                                                                                                                                                                                                                                                                                                                                                                                                                                                                                                                                                                                                                                                                                                                                                                                                                                                                                                                                                                                                                                                                                                                                                                                                                                                                                                                                                                                                                                                                                                                                                                                                                                                                                                                                                                                                                                                                                                                                                                                                                                                                                                                                                                         |         |          |         |          |          |         |         |          |         |          |          |          |         |          |                                                                                                                                                                                                                        |                                                                                                                                                                                                                                                                                                                                                                                                                                                                                                                                                                                                                                                                                                                                                                                                                                                                                                                                                                                                                                                                                                                                                                                                                                                                                                                                                                                                                                                                                                                                                                                                                                                                                                                                                                                                                                                                                                                                                                                                                                                                                                                                                                                                                                                                                                                                                                                                                                                                                                                                                                                                                                                                                                                                                                                                |   |          |          |          |   |         |          |          |   |          |          |          |   |          |          |          |   |          |          |         |   |          |          |         |   |          |          |          |   |          |          |          |   |          |          |          |   |         |          |         |   |          |          |         |   |          |         |          |   |          |          |          |   |          |         |          |   |          |          |         |   |          |          |          |   |          |          |         |   |          |         |          |   |          |          |          |   |          |         |          |   |          |          |          |   |          |          |          |   |          |          |          |   |          |          |          |   |          |         |         |   |          |         |         |   |         |          |          |   |          |          |          |   |          |          |          |   |          |          |          |   |          |          |         |   |          |          |         |   |         |         |          |   |         |         |          |   |         |         |          |   |         |         |          |   |          |         |          |   |          |          |         |
| C                                                                                                                                                                                                                     | -1.74968                                                                                                                                                                                                                                                                                                                                                                                                                                                                                                                                                                                                                                                                                                                                                                                                                                                                                                                                                                                                                                                                                                                                                                                                                                                                                                                                                                                                                                                                                                                                                                                                                                                                                                                                                                                                                                                                                                                                                                                                                                                                                                                                                                                                                                                                                                                                                                                                                                                                                                                                                                                                                                                                                                                                                                                     | 0.79700  | -0.16526 |          |          |   |          |         |          |   |          |          |          |   |          |          |          |   |          |         |          |   |          |          |          |   |          |          |          |   |          |          |          |   |          |         |          |   |          |          |         |   |                                                                                                                                                                                                                                                                                                                                                                                                                                                                                                                                                                                                                                                                                                                                                                     |          |         |         |          |          |         |         |          |         |          |          |          |          |         |         |          |          |          |         |          |         |         |          |          |          |          |          |          |          |          |          |          |          |          |         |          |          |          |          |          |          |          |   |          |          |          |   |          |          |          |   |          |          |          |   |          |          |         |   |          |          |         |   |          |          |         |   |          |          |         |   |          |          |          |   |          |          |         |   |          |         |         |   |          |         |          |   |          |         |         |   |          |         |         |                                                                                                                                                                                                                       |                                                                                                                                                                                                                                                                                                                                                                                                                                                                                                                                                                                                                                                                                                                                                                                                                                                                                                                                                                                                                                                                                                                                                                                                                                                                                                                                                                                                                                                                                                                                                                                                                                                                                                                                                                                                                                                                                                                                                                                                                                                                                                                                                                                                                                                                                                                                                                                                                                                                                                         |         |          |         |          |          |         |         |          |         |          |          |          |         |          |                                                                                                                                                                                                                        |                                                                                                                                                                                                                                                                                                                                                                                                                                                                                                                                                                                                                                                                                                                                                                                                                                                                                                                                                                                                                                                                                                                                                                                                                                                                                                                                                                                                                                                                                                                                                                                                                                                                                                                                                                                                                                                                                                                                                                                                                                                                                                                                                                                                                                                                                                                                                                                                                                                                                                                                                                                                                                                                                                                                                                                                |   |          |          |          |   |         |          |          |   |          |          |          |   |          |          |          |   |          |          |         |   |          |          |         |   |          |          |          |   |          |          |          |   |          |          |          |   |         |          |         |   |          |          |         |   |          |         |          |   |          |          |          |   |          |         |          |   |          |          |         |   |          |          |          |   |          |          |         |   |          |         |          |   |          |          |          |   |          |         |          |   |          |          |          |   |          |          |          |   |          |          |          |   |          |          |          |   |          |         |         |   |          |         |         |   |         |          |          |   |          |          |          |   |          |          |          |   |          |          |          |   |          |          |         |   |          |          |         |   |         |         |          |   |         |         |          |   |         |         |          |   |         |         |          |   |          |         |          |   |          |          |         |
| C                                                                                                                                                                                                                     | -1.22727                                                                                                                                                                                                                                                                                                                                                                                                                                                                                                                                                                                                                                                                                                                                                                                                                                                                                                                                                                                                                                                                                                                                                                                                                                                                                                                                                                                                                                                                                                                                                                                                                                                                                                                                                                                                                                                                                                                                                                                                                                                                                                                                                                                                                                                                                                                                                                                                                                                                                                                                                                                                                                                                                                                                                                                     | -1.50689 | 0.12129  |          |          |   |          |         |          |   |          |          |          |   |          |          |          |   |          |         |          |   |          |          |          |   |          |          |          |   |          |          |          |   |          |         |          |   |          |          |         |   |                                                                                                                                                                                                                                                                                                                                                                                                                                                                                                                                                                                                                                                                                                                                                                     |          |         |         |          |          |         |         |          |         |          |          |          |          |         |         |          |          |          |         |          |         |         |          |          |          |          |          |          |          |          |          |          |          |          |         |          |          |          |          |          |          |          |   |          |          |          |   |          |          |          |   |          |          |          |   |          |          |         |   |          |          |         |   |          |          |         |   |          |          |         |   |          |          |          |   |          |          |         |   |          |         |         |   |          |         |          |   |          |         |         |   |          |         |         |                                                                                                                                                                                                                       |                                                                                                                                                                                                                                                                                                                                                                                                                                                                                                                                                                                                                                                                                                                                                                                                                                                                                                                                                                                                                                                                                                                                                                                                                                                                                                                                                                                                                                                                                                                                                                                                                                                                                                                                                                                                                                                                                                                                                                                                                                                                                                                                                                                                                                                                                                                                                                                                                                                                                                         |         |          |         |          |          |         |         |          |         |          |          |          |         |          |                                                                                                                                                                                                                        |                                                                                                                                                                                                                                                                                                                                                                                                                                                                                                                                                                                                                                                                                                                                                                                                                                                                                                                                                                                                                                                                                                                                                                                                                                                                                                                                                                                                                                                                                                                                                                                                                                                                                                                                                                                                                                                                                                                                                                                                                                                                                                                                                                                                                                                                                                                                                                                                                                                                                                                                                                                                                                                                                                                                                                                                |   |          |          |          |   |         |          |          |   |          |          |          |   |          |          |          |   |          |          |         |   |          |          |         |   |          |          |          |   |          |          |          |   |          |          |          |   |         |          |         |   |          |          |         |   |          |         |          |   |          |          |          |   |          |         |          |   |          |          |         |   |          |          |          |   |          |          |         |   |          |         |          |   |          |          |          |   |          |         |          |   |          |          |          |   |          |          |          |   |          |          |          |   |          |          |          |   |          |         |         |   |          |         |         |   |         |          |          |   |          |          |          |   |          |          |          |   |          |          |          |   |          |          |         |   |          |          |         |   |         |         |          |   |         |         |          |   |         |         |          |   |         |         |          |   |          |         |          |   |          |          |         |

|                                                                                                                                                                                                                       |                                                                                                                                                                                                                                                                                                                                                                                                                                                                                                                                                                                                                                                                                                                                                                                                                                                                                                                                                                                                                                                                                                                                                                                                                                                                                                                                                                                                                                                                                                                                                                                                                                                                                                                                                                                                                                                                                                                                                                                                                                                                                                                                                                                                                                                                                                                                                                                                                                                                                                                                                                      |          |          |         |          |   |          |         |         |   |          |          |          |   |          |         |          |   |          |         |          |   |          |         |          |   |          |          |          |   |          |         |          |   |          |          |         |   |          |          |         |   |          |         |         |   |          |         |          |   |          |         |          |   |          |          |         |   |          |         |         |   |                                                                                                                                                                                                                                                                                                                                                                                                                                                                                                                                                                                                                                                                                                                                                                                                                                                                                                                                                                                                                                                                                                                            |         |         |          |          |          |         |          |          |          |         |         |          |         |          |          |          |         |          |          |          |         |          |         |          |         |          |         |          |          |          |          |          |          |          |          |          |          |          |         |          |          |          |          |          |          |          |         |          |         |          |         |          |          |          |          |         |          |          |         |         |          |         |   |         |         |          |                                                                                                                                                                                                                       |                                                                                                                                                                                                                                                                                                                                                                                                                                                                                                                                                                                                                                                                                                                                                                                                                                                                                                                                                                                                                                                                                                                                                                                                                                                                                                                                                                                                                                                                                                                                                                                                                                                                                                                                                                                                                                                                                                                                                                                                                                                                                                                                                                                                                                                                                                                                                              |         |          |          |         |          |          |         |         |         |         |                                                                                                                                                                                                                        |                                                                                                                                                                                                                                                                                                                                                                                                                                                                                                                                                                                                                                                                                                                                                                                                                                                                                                                                                                                                                                                                                                                                                                                                                                                                                                                                                                                                                                                                                                                                                                                                                                                                                                                                                                                                                                                                                                                                                                                                                                                                                                                                                                                                                                                                                                                                                                                                                                                                                                                                                                                      |   |          |          |          |   |          |          |          |   |          |         |          |   |         |          |          |   |          |         |          |   |          |          |          |   |         |          |          |   |          |         |         |   |          |          |         |   |          |          |         |   |          |         |          |   |          |          |          |   |          |          |         |   |          |          |          |   |          |          |          |   |          |          |         |   |          |          |         |   |          |          |          |   |          |          |          |   |          |          |          |   |          |          |          |   |          |          |          |   |          |          |          |   |          |          |         |   |         |          |          |   |          |         |         |   |          |         |         |   |         |          |          |   |         |          |          |   |         |          |          |   |         |          |          |   |          |          |          |   |         |          |          |   |          |          |          |   |          |          |          |
|-----------------------------------------------------------------------------------------------------------------------------------------------------------------------------------------------------------------------|----------------------------------------------------------------------------------------------------------------------------------------------------------------------------------------------------------------------------------------------------------------------------------------------------------------------------------------------------------------------------------------------------------------------------------------------------------------------------------------------------------------------------------------------------------------------------------------------------------------------------------------------------------------------------------------------------------------------------------------------------------------------------------------------------------------------------------------------------------------------------------------------------------------------------------------------------------------------------------------------------------------------------------------------------------------------------------------------------------------------------------------------------------------------------------------------------------------------------------------------------------------------------------------------------------------------------------------------------------------------------------------------------------------------------------------------------------------------------------------------------------------------------------------------------------------------------------------------------------------------------------------------------------------------------------------------------------------------------------------------------------------------------------------------------------------------------------------------------------------------------------------------------------------------------------------------------------------------------------------------------------------------------------------------------------------------------------------------------------------------------------------------------------------------------------------------------------------------------------------------------------------------------------------------------------------------------------------------------------------------------------------------------------------------------------------------------------------------------------------------------------------------------------------------------------------------|----------|----------|---------|----------|---|----------|---------|---------|---|----------|----------|----------|---|----------|---------|----------|---|----------|---------|----------|---|----------|---------|----------|---|----------|----------|----------|---|----------|---------|----------|---|----------|----------|---------|---|----------|----------|---------|---|----------|---------|---------|---|----------|---------|----------|---|----------|---------|----------|---|----------|----------|---------|---|----------|---------|---------|---|----------------------------------------------------------------------------------------------------------------------------------------------------------------------------------------------------------------------------------------------------------------------------------------------------------------------------------------------------------------------------------------------------------------------------------------------------------------------------------------------------------------------------------------------------------------------------------------------------------------------------------------------------------------------------------------------------------------------------------------------------------------------------------------------------------------------------------------------------------------------------------------------------------------------------------------------------------------------------------------------------------------------------------------------------------------------------------------------------------------------------|---------|---------|----------|----------|----------|---------|----------|----------|----------|---------|---------|----------|---------|----------|----------|----------|---------|----------|----------|----------|---------|----------|---------|----------|---------|----------|---------|----------|----------|----------|----------|----------|----------|----------|----------|----------|----------|----------|---------|----------|----------|----------|----------|----------|----------|----------|---------|----------|---------|----------|---------|----------|----------|----------|----------|---------|----------|----------|---------|---------|----------|---------|---|---------|---------|----------|-----------------------------------------------------------------------------------------------------------------------------------------------------------------------------------------------------------------------|--------------------------------------------------------------------------------------------------------------------------------------------------------------------------------------------------------------------------------------------------------------------------------------------------------------------------------------------------------------------------------------------------------------------------------------------------------------------------------------------------------------------------------------------------------------------------------------------------------------------------------------------------------------------------------------------------------------------------------------------------------------------------------------------------------------------------------------------------------------------------------------------------------------------------------------------------------------------------------------------------------------------------------------------------------------------------------------------------------------------------------------------------------------------------------------------------------------------------------------------------------------------------------------------------------------------------------------------------------------------------------------------------------------------------------------------------------------------------------------------------------------------------------------------------------------------------------------------------------------------------------------------------------------------------------------------------------------------------------------------------------------------------------------------------------------------------------------------------------------------------------------------------------------------------------------------------------------------------------------------------------------------------------------------------------------------------------------------------------------------------------------------------------------------------------------------------------------------------------------------------------------------------------------------------------------------------------------------------------------|---------|----------|----------|---------|----------|----------|---------|---------|---------|---------|------------------------------------------------------------------------------------------------------------------------------------------------------------------------------------------------------------------------|--------------------------------------------------------------------------------------------------------------------------------------------------------------------------------------------------------------------------------------------------------------------------------------------------------------------------------------------------------------------------------------------------------------------------------------------------------------------------------------------------------------------------------------------------------------------------------------------------------------------------------------------------------------------------------------------------------------------------------------------------------------------------------------------------------------------------------------------------------------------------------------------------------------------------------------------------------------------------------------------------------------------------------------------------------------------------------------------------------------------------------------------------------------------------------------------------------------------------------------------------------------------------------------------------------------------------------------------------------------------------------------------------------------------------------------------------------------------------------------------------------------------------------------------------------------------------------------------------------------------------------------------------------------------------------------------------------------------------------------------------------------------------------------------------------------------------------------------------------------------------------------------------------------------------------------------------------------------------------------------------------------------------------------------------------------------------------------------------------------------------------------------------------------------------------------------------------------------------------------------------------------------------------------------------------------------------------------------------------------------------------------------------------------------------------------------------------------------------------------------------------------------------------------------------------------------------------------|---|----------|----------|----------|---|----------|----------|----------|---|----------|---------|----------|---|---------|----------|----------|---|----------|---------|----------|---|----------|----------|----------|---|---------|----------|----------|---|----------|---------|---------|---|----------|----------|---------|---|----------|----------|---------|---|----------|---------|----------|---|----------|----------|----------|---|----------|----------|---------|---|----------|----------|----------|---|----------|----------|----------|---|----------|----------|---------|---|----------|----------|---------|---|----------|----------|----------|---|----------|----------|----------|---|----------|----------|----------|---|----------|----------|----------|---|----------|----------|----------|---|----------|----------|----------|---|----------|----------|---------|---|---------|----------|----------|---|----------|---------|---------|---|----------|---------|---------|---|---------|----------|----------|---|---------|----------|----------|---|---------|----------|----------|---|---------|----------|----------|---|----------|----------|----------|---|---------|----------|----------|---|----------|----------|----------|---|----------|----------|----------|
| 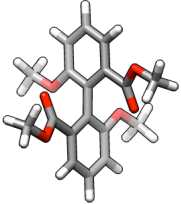 <p><b>2i</b><br/>                     -1147.958720<br/>                     -1147.764144<br/>                     -1148.759637</p>  | <table border="1"> <tbody> <tr><td>C</td><td>-0.79522</td><td>1.33671</td><td>2.83395</td></tr> <tr><td>C</td><td>1.55355</td><td>1.14528</td><td>2.34045</td></tr> <tr><td>H</td><td>-1.55472</td><td>-1.04428</td><td>-4.26210</td></tr> <tr><td>H</td><td>0.77166</td><td>1.83498</td><td>4.20830</td></tr> <tr><td>H</td><td>-1.32221</td><td>1.34665</td><td>-3.73181</td></tr> <tr><td>H</td><td>2.58575</td><td>1.24789</td><td>2.63662</td></tr> <tr><td>H</td><td>-1.10055</td><td>-2.75050</td><td>-2.53346</td></tr> <tr><td>H</td><td>-1.58035</td><td>1.58806</td><td>3.53091</td></tr> <tr><td>C</td><td>-0.39946</td><td>-2.35119</td><td>0.03547</td></tr> <tr><td>O</td><td>-0.41513</td><td>-2.16954</td><td>1.22959</td></tr> <tr><td>C</td><td>2.35351</td><td>0.37578</td><td>0.09971</td></tr> <tr><td>O</td><td>2.25428</td><td>0.31207</td><td>-1.10247</td></tr> <tr><td>O</td><td>-0.57872</td><td>2.29404</td><td>-1.31253</td></tr> <tr><td>O</td><td>-2.37017</td><td>0.68865</td><td>1.10803</td></tr> <tr><td>C</td><td>-3.44089</td><td>0.94411</td><td>1.99890</td></tr> <tr><td>H</td><td>-4.35136</td><td>0.71487</td><td>1.44928</td></tr> <tr><td>H</td><td>-3.45395</td><td>1.99353</td><td>2.31180</td></tr> <tr><td>H</td><td>-3.37391</td><td>0.30628</td><td>2.88607</td></tr> <tr><td>C</td><td>-0.76026</td><td>3.30289</td><td>-2.28958</td></tr> <tr><td>H</td><td>-1.78603</td><td>3.30260</td><td>-2.67323</td></tr> <tr><td>H</td><td>-0.06507</td><td>3.17002</td><td>-3.12467</td></tr> <tr><td>H</td><td>-0.55721</td><td>4.24721</td><td>-1.78895</td></tr> <tr><td>O</td><td>-0.17309</td><td>-3.57106</td><td>-0.50433</td></tr> <tr><td>C</td><td>0.02202</td><td>-4.63228</td><td>0.43973</td></tr> <tr><td>H</td><td>0.18764</td><td>-5.52701</td><td>-0.15561</td></tr> <tr><td>H</td><td>-0.85867</td><td>-4.74564</td><td>1.07308</td></tr> <tr><td>H</td><td>0.88488</td><td>-4.42342</td><td>1.07304</td></tr> <tr><td>O</td><td>3.53030</td><td>0.17530</td><td>0.73668</td></tr> <tr><td>C</td><td>4.65112</td><td>-0.09188</td><td>-0.11654</td></tr> <tr><td>H</td><td>4.47488</td><td>-0.99356</td><td>-0.70399</td></tr> <tr><td>H</td><td>5.50069</td><td>-0.22458</td><td>0.54905</td></tr> <tr><td>H</td><td>4.81912</td><td>0.74323</td><td>-0.79772</td></tr> </tbody> </table>                                                                                                                                                                                                            | C        | -0.79522 | 1.33671 | 2.83395  | C | 1.55355  | 1.14528 | 2.34045 | H | -1.55472 | -1.04428 | -4.26210 | H | 0.77166  | 1.83498 | 4.20830  | H | -1.32221 | 1.34665 | -3.73181 | H | 2.58575  | 1.24789 | 2.63662  | H | -1.10055 | -2.75050 | -2.53346 | H | -1.58035 | 1.58806 | 3.53091  | C | -0.39946 | -2.35119 | 0.03547 | O | -0.41513 | -2.16954 | 1.22959 | C | 2.35351  | 0.37578 | 0.09971 | O | 2.25428  | 0.31207 | -1.10247 | O | -0.57872 | 2.29404 | -1.31253 | O | -2.37017 | 0.68865  | 1.10803 | C | -3.44089 | 0.94411 | 1.99890 | H | -4.35136                                                                                                                                                                                                                                                                                                                                                                                                                                                                                                                                                                                                                                                                                                                                                                                                                                                                                                                                                                                                                                                                                                                   | 0.71487 | 1.44928 | H        | -3.45395 | 1.99353  | 2.31180 | H        | -3.37391 | 0.30628  | 2.88607 | C       | -0.76026 | 3.30289 | -2.28958 | H        | -1.78603 | 3.30260 | -2.67323 | H        | -0.06507 | 3.17002 | -3.12467 | H       | -0.55721 | 4.24721 | -1.78895 | O       | -0.17309 | -3.57106 | -0.50433 | C        | 0.02202  | -4.63228 | 0.43973  | H        | 0.18764  | -5.52701 | -0.15561 | H       | -0.85867 | -4.74564 | 1.07308  | H        | 0.88488  | -4.42342 | 1.07304  | O       | 3.53030  | 0.17530 | 0.73668  | C       | 4.65112  | -0.09188 | -0.11654 | H        | 4.47488 | -0.99356 | -0.70399 | H       | 5.50069 | -0.22458 | 0.54905 | H | 4.81912 | 0.74323 | -0.79772 |  <p><b>2i</b><br/>                     -1147.915381<br/>                     -1147.720077<br/>                     -1148.715612</p> | <table border="1"> <tbody> <tr><td>C</td><td>-2.55893</td><td>-1.76345</td><td>0.44580</td></tr> <tr><td>C</td><td>-3.07720</td><td>0.54339</td><td>0.18424</td></tr> <tr><td>H</td><td>4.49610</td><td>0.92025</td><td>-0.84964</td></tr> <tr><td>H</td><td>-4.49659</td><td>-0.92056</td><td>0.84628</td></tr> <tr><td>H</td><td>-2.87601</td><td>-2.78840</td><td>0.56627</td></tr> <tr><td>H</td><td>2.87579</td><td>2.78810</td><td>-0.56767</td></tr> <tr><td>H</td><td>3.80300</td><td>-1.34053</td><td>-0.14737</td></tr> <tr><td>H</td><td>-3.80298</td><td>1.34007</td><td>0.14409</td></tr> <tr><td>C</td><td>-0.51008</td><td>-2.70164</td><td>-0.42474</td></tr> <tr><td>O</td><td>0.02522</td><td>-2.72033</td><td>-1.50628</td></tr> <tr><td>C</td><td>0.51024</td><td>2.70079</td><td>0.42481</td></tr> <tr><td>O</td><td>-0.02507</td><td>2.71869</td><td>1.50636</td></tr> <tr><td>O</td><td>1.40610</td><td>-1.96517</td><td>0.76089</td></tr> <tr><td>O</td><td>-1.40544</td><td>1.96483</td><td>-0.76201</td></tr> <tr><td>C</td><td>-2.35049</td><td>3.01732</td><td>-0.85789</td></tr> <tr><td>H</td><td>-2.68409</td><td>3.33019</td><td>0.13528</td></tr> <tr><td>H</td><td>-3.21267</td><td>2.71570</td><td>-1.45878</td></tr> <tr><td>H</td><td>-1.82511</td><td>3.83231</td><td>-1.34898</td></tr> <tr><td>C</td><td>2.35147</td><td>-3.01736</td><td>0.85698</td></tr> <tr><td>H</td><td>3.21404</td><td>-2.71496</td><td>1.45691</td></tr> <tr><td>H</td><td>2.68437</td><td>-3.33109</td><td>-0.13615</td></tr> <tr><td>H</td><td>1.82668</td><td>-3.83201</td><td>1.34926</td></tr> <tr><td>O</td><td>0.68587</td><td>3.81254</td><td>-0.32456</td></tr> <tr><td>O</td><td>-0.68581</td><td>-3.81282</td><td>0.32544</td></tr> <tr><td>C</td><td>-0.24967</td><td>-5.03529</td><td>-0.28506</td></tr> <tr><td>H</td><td>-0.79263</td><td>-5.21096</td><td>-1.21446</td></tr> <tr><td>H</td><td>-0.46311</td><td>-5.81741</td><td>0.43992</td></tr> <tr><td>H</td><td>0.81668</td><td>-4.99519</td><td>-0.50683</td></tr> <tr><td>C</td><td>0.24958</td><td>5.03450</td><td>0.28692</td></tr> <tr><td>H</td><td>-0.81629</td><td>4.99325</td><td>0.51076</td></tr> <tr><td>H</td><td>0.46084</td><td>5.81693</td><td>-0.43837</td></tr> <tr><td>H</td><td>0.79418</td><td>5.21063</td><td>1.21528</td></tr> </tbody> </table> | C       | -2.55893 | -1.76345 | 0.44580 | C        | -3.07720 | 0.54339 | 0.18424 | H       | 4.49610 | 0.92025                                                                                                                                                                                                                | -0.84964                                                                                                                                                                                                                                                                                                                                                                                                                                                                                                                                                                                                                                                                                                                                                                                                                                                                                                                                                                                                                                                                                                                                                                                                                                                                                                                                                                                                                                                                                                                                                                                                                                                                                                                                                                                                                                                                                                                                                                                                                                                                                                                                                                                                                                                                                                                                                                                                                                                                                                                                                                             | H | -4.49659 | -0.92056 | 0.84628  | H | -2.87601 | -2.78840 | 0.56627  | H | 2.87579  | 2.78810 | -0.56767 | H | 3.80300 | -1.34053 | -0.14737 | H | -3.80298 | 1.34007 | 0.14409  | C | -0.51008 | -2.70164 | -0.42474 | O | 0.02522 | -2.72033 | -1.50628 | C | 0.51024  | 2.70079 | 0.42481 | O | -0.02507 | 2.71869  | 1.50636 | O | 1.40610  | -1.96517 | 0.76089 | O | -1.40544 | 1.96483 | -0.76201 | C | -2.35049 | 3.01732  | -0.85789 | H | -2.68409 | 3.33019  | 0.13528 | H | -3.21267 | 2.71570  | -1.45878 | H | -1.82511 | 3.83231  | -1.34898 | C | 2.35147  | -3.01736 | 0.85698 | H | 3.21404  | -2.71496 | 1.45691 | H | 2.68437  | -3.33109 | -0.13615 | H | 1.82668  | -3.83201 | 1.34926  | O | 0.68587  | 3.81254  | -0.32456 | O | -0.68581 | -3.81282 | 0.32544  | C | -0.24967 | -5.03529 | -0.28506 | H | -0.79263 | -5.21096 | -1.21446 | H | -0.46311 | -5.81741 | 0.43992 | H | 0.81668 | -4.99519 | -0.50683 | C | 0.24958  | 5.03450 | 0.28692 | H | -0.81629 | 4.99325 | 0.51076 | H | 0.46084 | 5.81693  | -0.43837 | H | 0.79418 | 5.21063  | 1.21528  |   |         |          |          |   |         |          |          |   |          |          |          |   |         |          |          |   |          |          |          |   |          |          |          |
| C                                                                                                                                                                                                                     | -0.79522                                                                                                                                                                                                                                                                                                                                                                                                                                                                                                                                                                                                                                                                                                                                                                                                                                                                                                                                                                                                                                                                                                                                                                                                                                                                                                                                                                                                                                                                                                                                                                                                                                                                                                                                                                                                                                                                                                                                                                                                                                                                                                                                                                                                                                                                                                                                                                                                                                                                                                                                                             | 1.33671  | 2.83395  |         |          |   |          |         |         |   |          |          |          |   |          |         |          |   |          |         |          |   |          |         |          |   |          |          |          |   |          |         |          |   |          |          |         |   |          |          |         |   |          |         |         |   |          |         |          |   |          |         |          |   |          |          |         |   |          |         |         |   |                                                                                                                                                                                                                                                                                                                                                                                                                                                                                                                                                                                                                                                                                                                                                                                                                                                                                                                                                                                                                                                                                                                            |         |         |          |          |          |         |          |          |          |         |         |          |         |          |          |          |         |          |          |          |         |          |         |          |         |          |         |          |          |          |          |          |          |          |          |          |          |          |         |          |          |          |          |          |          |          |         |          |         |          |         |          |          |          |          |         |          |          |         |         |          |         |   |         |         |          |                                                                                                                                                                                                                       |                                                                                                                                                                                                                                                                                                                                                                                                                                                                                                                                                                                                                                                                                                                                                                                                                                                                                                                                                                                                                                                                                                                                                                                                                                                                                                                                                                                                                                                                                                                                                                                                                                                                                                                                                                                                                                                                                                                                                                                                                                                                                                                                                                                                                                                                                                                                                              |         |          |          |         |          |          |         |         |         |         |                                                                                                                                                                                                                        |                                                                                                                                                                                                                                                                                                                                                                                                                                                                                                                                                                                                                                                                                                                                                                                                                                                                                                                                                                                                                                                                                                                                                                                                                                                                                                                                                                                                                                                                                                                                                                                                                                                                                                                                                                                                                                                                                                                                                                                                                                                                                                                                                                                                                                                                                                                                                                                                                                                                                                                                                                                      |   |          |          |          |   |          |          |          |   |          |         |          |   |         |          |          |   |          |         |          |   |          |          |          |   |         |          |          |   |          |         |         |   |          |          |         |   |          |          |         |   |          |         |          |   |          |          |          |   |          |          |         |   |          |          |          |   |          |          |          |   |          |          |         |   |          |          |         |   |          |          |          |   |          |          |          |   |          |          |          |   |          |          |          |   |          |          |          |   |          |          |          |   |          |          |         |   |         |          |          |   |          |         |         |   |          |         |         |   |         |          |          |   |         |          |          |   |         |          |          |   |         |          |          |   |          |          |          |   |         |          |          |   |          |          |          |   |          |          |          |
| C                                                                                                                                                                                                                     | 1.55355                                                                                                                                                                                                                                                                                                                                                                                                                                                                                                                                                                                                                                                                                                                                                                                                                                                                                                                                                                                                                                                                                                                                                                                                                                                                                                                                                                                                                                                                                                                                                                                                                                                                                                                                                                                                                                                                                                                                                                                                                                                                                                                                                                                                                                                                                                                                                                                                                                                                                                                                                              | 1.14528  | 2.34045  |         |          |   |          |         |         |   |          |          |          |   |          |         |          |   |          |         |          |   |          |         |          |   |          |          |          |   |          |         |          |   |          |          |         |   |          |          |         |   |          |         |         |   |          |         |          |   |          |         |          |   |          |          |         |   |          |         |         |   |                                                                                                                                                                                                                                                                                                                                                                                                                                                                                                                                                                                                                                                                                                                                                                                                                                                                                                                                                                                                                                                                                                                            |         |         |          |          |          |         |          |          |          |         |         |          |         |          |          |          |         |          |          |          |         |          |         |          |         |          |         |          |          |          |          |          |          |          |          |          |          |          |         |          |          |          |          |          |          |          |         |          |         |          |         |          |          |          |          |         |          |          |         |         |          |         |   |         |         |          |                                                                                                                                                                                                                       |                                                                                                                                                                                                                                                                                                                                                                                                                                                                                                                                                                                                                                                                                                                                                                                                                                                                                                                                                                                                                                                                                                                                                                                                                                                                                                                                                                                                                                                                                                                                                                                                                                                                                                                                                                                                                                                                                                                                                                                                                                                                                                                                                                                                                                                                                                                                                              |         |          |          |         |          |          |         |         |         |         |                                                                                                                                                                                                                        |                                                                                                                                                                                                                                                                                                                                                                                                                                                                                                                                                                                                                                                                                                                                                                                                                                                                                                                                                                                                                                                                                                                                                                                                                                                                                                                                                                                                                                                                                                                                                                                                                                                                                                                                                                                                                                                                                                                                                                                                                                                                                                                                                                                                                                                                                                                                                                                                                                                                                                                                                                                      |   |          |          |          |   |          |          |          |   |          |         |          |   |         |          |          |   |          |         |          |   |          |          |          |   |         |          |          |   |          |         |         |   |          |          |         |   |          |          |         |   |          |         |          |   |          |          |          |   |          |          |         |   |          |          |          |   |          |          |          |   |          |          |         |   |          |          |         |   |          |          |          |   |          |          |          |   |          |          |          |   |          |          |          |   |          |          |          |   |          |          |          |   |          |          |         |   |         |          |          |   |          |         |         |   |          |         |         |   |         |          |          |   |         |          |          |   |         |          |          |   |         |          |          |   |          |          |          |   |         |          |          |   |          |          |          |   |          |          |          |
| H                                                                                                                                                                                                                     | -1.55472                                                                                                                                                                                                                                                                                                                                                                                                                                                                                                                                                                                                                                                                                                                                                                                                                                                                                                                                                                                                                                                                                                                                                                                                                                                                                                                                                                                                                                                                                                                                                                                                                                                                                                                                                                                                                                                                                                                                                                                                                                                                                                                                                                                                                                                                                                                                                                                                                                                                                                                                                             | -1.04428 | -4.26210 |         |          |   |          |         |         |   |          |          |          |   |          |         |          |   |          |         |          |   |          |         |          |   |          |          |          |   |          |         |          |   |          |          |         |   |          |          |         |   |          |         |         |   |          |         |          |   |          |         |          |   |          |          |         |   |          |         |         |   |                                                                                                                                                                                                                                                                                                                                                                                                                                                                                                                                                                                                                                                                                                                                                                                                                                                                                                                                                                                                                                                                                                                            |         |         |          |          |          |         |          |          |          |         |         |          |         |          |          |          |         |          |          |          |         |          |         |          |         |          |         |          |          |          |          |          |          |          |          |          |          |          |         |          |          |          |          |          |          |          |         |          |         |          |         |          |          |          |          |         |          |          |         |         |          |         |   |         |         |          |                                                                                                                                                                                                                       |                                                                                                                                                                                                                                                                                                                                                                                                                                                                                                                                                                                                                                                                                                                                                                                                                                                                                                                                                                                                                                                                                                                                                                                                                                                                                                                                                                                                                                                                                                                                                                                                                                                                                                                                                                                                                                                                                                                                                                                                                                                                                                                                                                                                                                                                                                                                                              |         |          |          |         |          |          |         |         |         |         |                                                                                                                                                                                                                        |                                                                                                                                                                                                                                                                                                                                                                                                                                                                                                                                                                                                                                                                                                                                                                                                                                                                                                                                                                                                                                                                                                                                                                                                                                                                                                                                                                                                                                                                                                                                                                                                                                                                                                                                                                                                                                                                                                                                                                                                                                                                                                                                                                                                                                                                                                                                                                                                                                                                                                                                                                                      |   |          |          |          |   |          |          |          |   |          |         |          |   |         |          |          |   |          |         |          |   |          |          |          |   |         |          |          |   |          |         |         |   |          |          |         |   |          |          |         |   |          |         |          |   |          |          |          |   |          |          |         |   |          |          |          |   |          |          |          |   |          |          |         |   |          |          |         |   |          |          |          |   |          |          |          |   |          |          |          |   |          |          |          |   |          |          |          |   |          |          |          |   |          |          |         |   |         |          |          |   |          |         |         |   |          |         |         |   |         |          |          |   |         |          |          |   |         |          |          |   |         |          |          |   |          |          |          |   |         |          |          |   |          |          |          |   |          |          |          |
| H                                                                                                                                                                                                                     | 0.77166                                                                                                                                                                                                                                                                                                                                                                                                                                                                                                                                                                                                                                                                                                                                                                                                                                                                                                                                                                                                                                                                                                                                                                                                                                                                                                                                                                                                                                                                                                                                                                                                                                                                                                                                                                                                                                                                                                                                                                                                                                                                                                                                                                                                                                                                                                                                                                                                                                                                                                                                                              | 1.83498  | 4.20830  |         |          |   |          |         |         |   |          |          |          |   |          |         |          |   |          |         |          |   |          |         |          |   |          |          |          |   |          |         |          |   |          |          |         |   |          |          |         |   |          |         |         |   |          |         |          |   |          |         |          |   |          |          |         |   |          |         |         |   |                                                                                                                                                                                                                                                                                                                                                                                                                                                                                                                                                                                                                                                                                                                                                                                                                                                                                                                                                                                                                                                                                                                            |         |         |          |          |          |         |          |          |          |         |         |          |         |          |          |          |         |          |          |          |         |          |         |          |         |          |         |          |          |          |          |          |          |          |          |          |          |          |         |          |          |          |          |          |          |          |         |          |         |          |         |          |          |          |          |         |          |          |         |         |          |         |   |         |         |          |                                                                                                                                                                                                                       |                                                                                                                                                                                                                                                                                                                                                                                                                                                                                                                                                                                                                                                                                                                                                                                                                                                                                                                                                                                                                                                                                                                                                                                                                                                                                                                                                                                                                                                                                                                                                                                                                                                                                                                                                                                                                                                                                                                                                                                                                                                                                                                                                                                                                                                                                                                                                              |         |          |          |         |          |          |         |         |         |         |                                                                                                                                                                                                                        |                                                                                                                                                                                                                                                                                                                                                                                                                                                                                                                                                                                                                                                                                                                                                                                                                                                                                                                                                                                                                                                                                                                                                                                                                                                                                                                                                                                                                                                                                                                                                                                                                                                                                                                                                                                                                                                                                                                                                                                                                                                                                                                                                                                                                                                                                                                                                                                                                                                                                                                                                                                      |   |          |          |          |   |          |          |          |   |          |         |          |   |         |          |          |   |          |         |          |   |          |          |          |   |         |          |          |   |          |         |         |   |          |          |         |   |          |          |         |   |          |         |          |   |          |          |          |   |          |          |         |   |          |          |          |   |          |          |          |   |          |          |         |   |          |          |         |   |          |          |          |   |          |          |          |   |          |          |          |   |          |          |          |   |          |          |          |   |          |          |          |   |          |          |         |   |         |          |          |   |          |         |         |   |          |         |         |   |         |          |          |   |         |          |          |   |         |          |          |   |         |          |          |   |          |          |          |   |         |          |          |   |          |          |          |   |          |          |          |
| H                                                                                                                                                                                                                     | -1.32221                                                                                                                                                                                                                                                                                                                                                                                                                                                                                                                                                                                                                                                                                                                                                                                                                                                                                                                                                                                                                                                                                                                                                                                                                                                                                                                                                                                                                                                                                                                                                                                                                                                                                                                                                                                                                                                                                                                                                                                                                                                                                                                                                                                                                                                                                                                                                                                                                                                                                                                                                             | 1.34665  | -3.73181 |         |          |   |          |         |         |   |          |          |          |   |          |         |          |   |          |         |          |   |          |         |          |   |          |          |          |   |          |         |          |   |          |          |         |   |          |          |         |   |          |         |         |   |          |         |          |   |          |         |          |   |          |          |         |   |          |         |         |   |                                                                                                                                                                                                                                                                                                                                                                                                                                                                                                                                                                                                                                                                                                                                                                                                                                                                                                                                                                                                                                                                                                                            |         |         |          |          |          |         |          |          |          |         |         |          |         |          |          |          |         |          |          |          |         |          |         |          |         |          |         |          |          |          |          |          |          |          |          |          |          |          |         |          |          |          |          |          |          |          |         |          |         |          |         |          |          |          |          |         |          |          |         |         |          |         |   |         |         |          |                                                                                                                                                                                                                       |                                                                                                                                                                                                                                                                                                                                                                                                                                                                                                                                                                                                                                                                                                                                                                                                                                                                                                                                                                                                                                                                                                                                                                                                                                                                                                                                                                                                                                                                                                                                                                                                                                                                                                                                                                                                                                                                                                                                                                                                                                                                                                                                                                                                                                                                                                                                                              |         |          |          |         |          |          |         |         |         |         |                                                                                                                                                                                                                        |                                                                                                                                                                                                                                                                                                                                                                                                                                                                                                                                                                                                                                                                                                                                                                                                                                                                                                                                                                                                                                                                                                                                                                                                                                                                                                                                                                                                                                                                                                                                                                                                                                                                                                                                                                                                                                                                                                                                                                                                                                                                                                                                                                                                                                                                                                                                                                                                                                                                                                                                                                                      |   |          |          |          |   |          |          |          |   |          |         |          |   |         |          |          |   |          |         |          |   |          |          |          |   |         |          |          |   |          |         |         |   |          |          |         |   |          |          |         |   |          |         |          |   |          |          |          |   |          |          |         |   |          |          |          |   |          |          |          |   |          |          |         |   |          |          |         |   |          |          |          |   |          |          |          |   |          |          |          |   |          |          |          |   |          |          |          |   |          |          |          |   |          |          |         |   |         |          |          |   |          |         |         |   |          |         |         |   |         |          |          |   |         |          |          |   |         |          |          |   |         |          |          |   |          |          |          |   |         |          |          |   |          |          |          |   |          |          |          |
| H                                                                                                                                                                                                                     | 2.58575                                                                                                                                                                                                                                                                                                                                                                                                                                                                                                                                                                                                                                                                                                                                                                                                                                                                                                                                                                                                                                                                                                                                                                                                                                                                                                                                                                                                                                                                                                                                                                                                                                                                                                                                                                                                                                                                                                                                                                                                                                                                                                                                                                                                                                                                                                                                                                                                                                                                                                                                                              | 1.24789  | 2.63662  |         |          |   |          |         |         |   |          |          |          |   |          |         |          |   |          |         |          |   |          |         |          |   |          |          |          |   |          |         |          |   |          |          |         |   |          |          |         |   |          |         |         |   |          |         |          |   |          |         |          |   |          |          |         |   |          |         |         |   |                                                                                                                                                                                                                                                                                                                                                                                                                                                                                                                                                                                                                                                                                                                                                                                                                                                                                                                                                                                                                                                                                                                            |         |         |          |          |          |         |          |          |          |         |         |          |         |          |          |          |         |          |          |          |         |          |         |          |         |          |         |          |          |          |          |          |          |          |          |          |          |          |         |          |          |          |          |          |          |          |         |          |         |          |         |          |          |          |          |         |          |          |         |         |          |         |   |         |         |          |                                                                                                                                                                                                                       |                                                                                                                                                                                                                                                                                                                                                                                                                                                                                                                                                                                                                                                                                                                                                                                                                                                                                                                                                                                                                                                                                                                                                                                                                                                                                                                                                                                                                                                                                                                                                                                                                                                                                                                                                                                                                                                                                                                                                                                                                                                                                                                                                                                                                                                                                                                                                              |         |          |          |         |          |          |         |         |         |         |                                                                                                                                                                                                                        |                                                                                                                                                                                                                                                                                                                                                                                                                                                                                                                                                                                                                                                                                                                                                                                                                                                                                                                                                                                                                                                                                                                                                                                                                                                                                                                                                                                                                                                                                                                                                                                                                                                                                                                                                                                                                                                                                                                                                                                                                                                                                                                                                                                                                                                                                                                                                                                                                                                                                                                                                                                      |   |          |          |          |   |          |          |          |   |          |         |          |   |         |          |          |   |          |         |          |   |          |          |          |   |         |          |          |   |          |         |         |   |          |          |         |   |          |          |         |   |          |         |          |   |          |          |          |   |          |          |         |   |          |          |          |   |          |          |          |   |          |          |         |   |          |          |         |   |          |          |          |   |          |          |          |   |          |          |          |   |          |          |          |   |          |          |          |   |          |          |          |   |          |          |         |   |         |          |          |   |          |         |         |   |          |         |         |   |         |          |          |   |         |          |          |   |         |          |          |   |         |          |          |   |          |          |          |   |         |          |          |   |          |          |          |   |          |          |          |
| H                                                                                                                                                                                                                     | -1.10055                                                                                                                                                                                                                                                                                                                                                                                                                                                                                                                                                                                                                                                                                                                                                                                                                                                                                                                                                                                                                                                                                                                                                                                                                                                                                                                                                                                                                                                                                                                                                                                                                                                                                                                                                                                                                                                                                                                                                                                                                                                                                                                                                                                                                                                                                                                                                                                                                                                                                                                                                             | -2.75050 | -2.53346 |         |          |   |          |         |         |   |          |          |          |   |          |         |          |   |          |         |          |   |          |         |          |   |          |          |          |   |          |         |          |   |          |          |         |   |          |          |         |   |          |         |         |   |          |         |          |   |          |         |          |   |          |          |         |   |          |         |         |   |                                                                                                                                                                                                                                                                                                                                                                                                                                                                                                                                                                                                                                                                                                                                                                                                                                                                                                                                                                                                                                                                                                                            |         |         |          |          |          |         |          |          |          |         |         |          |         |          |          |          |         |          |          |          |         |          |         |          |         |          |         |          |          |          |          |          |          |          |          |          |          |          |         |          |          |          |          |          |          |          |         |          |         |          |         |          |          |          |          |         |          |          |         |         |          |         |   |         |         |          |                                                                                                                                                                                                                       |                                                                                                                                                                                                                                                                                                                                                                                                                                                                                                                                                                                                                                                                                                                                                                                                                                                                                                                                                                                                                                                                                                                                                                                                                                                                                                                                                                                                                                                                                                                                                                                                                                                                                                                                                                                                                                                                                                                                                                                                                                                                                                                                                                                                                                                                                                                                                              |         |          |          |         |          |          |         |         |         |         |                                                                                                                                                                                                                        |                                                                                                                                                                                                                                                                                                                                                                                                                                                                                                                                                                                                                                                                                                                                                                                                                                                                                                                                                                                                                                                                                                                                                                                                                                                                                                                                                                                                                                                                                                                                                                                                                                                                                                                                                                                                                                                                                                                                                                                                                                                                                                                                                                                                                                                                                                                                                                                                                                                                                                                                                                                      |   |          |          |          |   |          |          |          |   |          |         |          |   |         |          |          |   |          |         |          |   |          |          |          |   |         |          |          |   |          |         |         |   |          |          |         |   |          |          |         |   |          |         |          |   |          |          |          |   |          |          |         |   |          |          |          |   |          |          |          |   |          |          |         |   |          |          |         |   |          |          |          |   |          |          |          |   |          |          |          |   |          |          |          |   |          |          |          |   |          |          |          |   |          |          |         |   |         |          |          |   |          |         |         |   |          |         |         |   |         |          |          |   |         |          |          |   |         |          |          |   |         |          |          |   |          |          |          |   |         |          |          |   |          |          |          |   |          |          |          |
| H                                                                                                                                                                                                                     | -1.58035                                                                                                                                                                                                                                                                                                                                                                                                                                                                                                                                                                                                                                                                                                                                                                                                                                                                                                                                                                                                                                                                                                                                                                                                                                                                                                                                                                                                                                                                                                                                                                                                                                                                                                                                                                                                                                                                                                                                                                                                                                                                                                                                                                                                                                                                                                                                                                                                                                                                                                                                                             | 1.58806  | 3.53091  |         |          |   |          |         |         |   |          |          |          |   |          |         |          |   |          |         |          |   |          |         |          |   |          |          |          |   |          |         |          |   |          |          |         |   |          |          |         |   |          |         |         |   |          |         |          |   |          |         |          |   |          |          |         |   |          |         |         |   |                                                                                                                                                                                                                                                                                                                                                                                                                                                                                                                                                                                                                                                                                                                                                                                                                                                                                                                                                                                                                                                                                                                            |         |         |          |          |          |         |          |          |          |         |         |          |         |          |          |          |         |          |          |          |         |          |         |          |         |          |         |          |          |          |          |          |          |          |          |          |          |          |         |          |          |          |          |          |          |          |         |          |         |          |         |          |          |          |          |         |          |          |         |         |          |         |   |         |         |          |                                                                                                                                                                                                                       |                                                                                                                                                                                                                                                                                                                                                                                                                                                                                                                                                                                                                                                                                                                                                                                                                                                                                                                                                                                                                                                                                                                                                                                                                                                                                                                                                                                                                                                                                                                                                                                                                                                                                                                                                                                                                                                                                                                                                                                                                                                                                                                                                                                                                                                                                                                                                              |         |          |          |         |          |          |         |         |         |         |                                                                                                                                                                                                                        |                                                                                                                                                                                                                                                                                                                                                                                                                                                                                                                                                                                                                                                                                                                                                                                                                                                                                                                                                                                                                                                                                                                                                                                                                                                                                                                                                                                                                                                                                                                                                                                                                                                                                                                                                                                                                                                                                                                                                                                                                                                                                                                                                                                                                                                                                                                                                                                                                                                                                                                                                                                      |   |          |          |          |   |          |          |          |   |          |         |          |   |         |          |          |   |          |         |          |   |          |          |          |   |         |          |          |   |          |         |         |   |          |          |         |   |          |          |         |   |          |         |          |   |          |          |          |   |          |          |         |   |          |          |          |   |          |          |          |   |          |          |         |   |          |          |         |   |          |          |          |   |          |          |          |   |          |          |          |   |          |          |          |   |          |          |          |   |          |          |          |   |          |          |         |   |         |          |          |   |          |         |         |   |          |         |         |   |         |          |          |   |         |          |          |   |         |          |          |   |         |          |          |   |          |          |          |   |         |          |          |   |          |          |          |   |          |          |          |
| C                                                                                                                                                                                                                     | -0.39946                                                                                                                                                                                                                                                                                                                                                                                                                                                                                                                                                                                                                                                                                                                                                                                                                                                                                                                                                                                                                                                                                                                                                                                                                                                                                                                                                                                                                                                                                                                                                                                                                                                                                                                                                                                                                                                                                                                                                                                                                                                                                                                                                                                                                                                                                                                                                                                                                                                                                                                                                             | -2.35119 | 0.03547  |         |          |   |          |         |         |   |          |          |          |   |          |         |          |   |          |         |          |   |          |         |          |   |          |          |          |   |          |         |          |   |          |          |         |   |          |          |         |   |          |         |         |   |          |         |          |   |          |         |          |   |          |          |         |   |          |         |         |   |                                                                                                                                                                                                                                                                                                                                                                                                                                                                                                                                                                                                                                                                                                                                                                                                                                                                                                                                                                                                                                                                                                                            |         |         |          |          |          |         |          |          |          |         |         |          |         |          |          |          |         |          |          |          |         |          |         |          |         |          |         |          |          |          |          |          |          |          |          |          |          |          |         |          |          |          |          |          |          |          |         |          |         |          |         |          |          |          |          |         |          |          |         |         |          |         |   |         |         |          |                                                                                                                                                                                                                       |                                                                                                                                                                                                                                                                                                                                                                                                                                                                                                                                                                                                                                                                                                                                                                                                                                                                                                                                                                                                                                                                                                                                                                                                                                                                                                                                                                                                                                                                                                                                                                                                                                                                                                                                                                                                                                                                                                                                                                                                                                                                                                                                                                                                                                                                                                                                                              |         |          |          |         |          |          |         |         |         |         |                                                                                                                                                                                                                        |                                                                                                                                                                                                                                                                                                                                                                                                                                                                                                                                                                                                                                                                                                                                                                                                                                                                                                                                                                                                                                                                                                                                                                                                                                                                                                                                                                                                                                                                                                                                                                                                                                                                                                                                                                                                                                                                                                                                                                                                                                                                                                                                                                                                                                                                                                                                                                                                                                                                                                                                                                                      |   |          |          |          |   |          |          |          |   |          |         |          |   |         |          |          |   |          |         |          |   |          |          |          |   |         |          |          |   |          |         |         |   |          |          |         |   |          |          |         |   |          |         |          |   |          |          |          |   |          |          |         |   |          |          |          |   |          |          |          |   |          |          |         |   |          |          |         |   |          |          |          |   |          |          |          |   |          |          |          |   |          |          |          |   |          |          |          |   |          |          |          |   |          |          |         |   |         |          |          |   |          |         |         |   |          |         |         |   |         |          |          |   |         |          |          |   |         |          |          |   |         |          |          |   |          |          |          |   |         |          |          |   |          |          |          |   |          |          |          |
| O                                                                                                                                                                                                                     | -0.41513                                                                                                                                                                                                                                                                                                                                                                                                                                                                                                                                                                                                                                                                                                                                                                                                                                                                                                                                                                                                                                                                                                                                                                                                                                                                                                                                                                                                                                                                                                                                                                                                                                                                                                                                                                                                                                                                                                                                                                                                                                                                                                                                                                                                                                                                                                                                                                                                                                                                                                                                                             | -2.16954 | 1.22959  |         |          |   |          |         |         |   |          |          |          |   |          |         |          |   |          |         |          |   |          |         |          |   |          |          |          |   |          |         |          |   |          |          |         |   |          |          |         |   |          |         |         |   |          |         |          |   |          |         |          |   |          |          |         |   |          |         |         |   |                                                                                                                                                                                                                                                                                                                                                                                                                                                                                                                                                                                                                                                                                                                                                                                                                                                                                                                                                                                                                                                                                                                            |         |         |          |          |          |         |          |          |          |         |         |          |         |          |          |          |         |          |          |          |         |          |         |          |         |          |         |          |          |          |          |          |          |          |          |          |          |          |         |          |          |          |          |          |          |          |         |          |         |          |         |          |          |          |          |         |          |          |         |         |          |         |   |         |         |          |                                                                                                                                                                                                                       |                                                                                                                                                                                                                                                                                                                                                                                                                                                                                                                                                                                                                                                                                                                                                                                                                                                                                                                                                                                                                                                                                                                                                                                                                                                                                                                                                                                                                                                                                                                                                                                                                                                                                                                                                                                                                                                                                                                                                                                                                                                                                                                                                                                                                                                                                                                                                              |         |          |          |         |          |          |         |         |         |         |                                                                                                                                                                                                                        |                                                                                                                                                                                                                                                                                                                                                                                                                                                                                                                                                                                                                                                                                                                                                                                                                                                                                                                                                                                                                                                                                                                                                                                                                                                                                                                                                                                                                                                                                                                                                                                                                                                                                                                                                                                                                                                                                                                                                                                                                                                                                                                                                                                                                                                                                                                                                                                                                                                                                                                                                                                      |   |          |          |          |   |          |          |          |   |          |         |          |   |         |          |          |   |          |         |          |   |          |          |          |   |         |          |          |   |          |         |         |   |          |          |         |   |          |          |         |   |          |         |          |   |          |          |          |   |          |          |         |   |          |          |          |   |          |          |          |   |          |          |         |   |          |          |         |   |          |          |          |   |          |          |          |   |          |          |          |   |          |          |          |   |          |          |          |   |          |          |          |   |          |          |         |   |         |          |          |   |          |         |         |   |          |         |         |   |         |          |          |   |         |          |          |   |         |          |          |   |         |          |          |   |          |          |          |   |         |          |          |   |          |          |          |   |          |          |          |
| C                                                                                                                                                                                                                     | 2.35351                                                                                                                                                                                                                                                                                                                                                                                                                                                                                                                                                                                                                                                                                                                                                                                                                                                                                                                                                                                                                                                                                                                                                                                                                                                                                                                                                                                                                                                                                                                                                                                                                                                                                                                                                                                                                                                                                                                                                                                                                                                                                                                                                                                                                                                                                                                                                                                                                                                                                                                                                              | 0.37578  | 0.09971  |         |          |   |          |         |         |   |          |          |          |   |          |         |          |   |          |         |          |   |          |         |          |   |          |          |          |   |          |         |          |   |          |          |         |   |          |          |         |   |          |         |         |   |          |         |          |   |          |         |          |   |          |          |         |   |          |         |         |   |                                                                                                                                                                                                                                                                                                                                                                                                                                                                                                                                                                                                                                                                                                                                                                                                                                                                                                                                                                                                                                                                                                                            |         |         |          |          |          |         |          |          |          |         |         |          |         |          |          |          |         |          |          |          |         |          |         |          |         |          |         |          |          |          |          |          |          |          |          |          |          |          |         |          |          |          |          |          |          |          |         |          |         |          |         |          |          |          |          |         |          |          |         |         |          |         |   |         |         |          |                                                                                                                                                                                                                       |                                                                                                                                                                                                                                                                                                                                                                                                                                                                                                                                                                                                                                                                                                                                                                                                                                                                                                                                                                                                                                                                                                                                                                                                                                                                                                                                                                                                                                                                                                                                                                                                                                                                                                                                                                                                                                                                                                                                                                                                                                                                                                                                                                                                                                                                                                                                                              |         |          |          |         |          |          |         |         |         |         |                                                                                                                                                                                                                        |                                                                                                                                                                                                                                                                                                                                                                                                                                                                                                                                                                                                                                                                                                                                                                                                                                                                                                                                                                                                                                                                                                                                                                                                                                                                                                                                                                                                                                                                                                                                                                                                                                                                                                                                                                                                                                                                                                                                                                                                                                                                                                                                                                                                                                                                                                                                                                                                                                                                                                                                                                                      |   |          |          |          |   |          |          |          |   |          |         |          |   |         |          |          |   |          |         |          |   |          |          |          |   |         |          |          |   |          |         |         |   |          |          |         |   |          |          |         |   |          |         |          |   |          |          |          |   |          |          |         |   |          |          |          |   |          |          |          |   |          |          |         |   |          |          |         |   |          |          |          |   |          |          |          |   |          |          |          |   |          |          |          |   |          |          |          |   |          |          |          |   |          |          |         |   |         |          |          |   |          |         |         |   |          |         |         |   |         |          |          |   |         |          |          |   |         |          |          |   |         |          |          |   |          |          |          |   |         |          |          |   |          |          |          |   |          |          |          |
| O                                                                                                                                                                                                                     | 2.25428                                                                                                                                                                                                                                                                                                                                                                                                                                                                                                                                                                                                                                                                                                                                                                                                                                                                                                                                                                                                                                                                                                                                                                                                                                                                                                                                                                                                                                                                                                                                                                                                                                                                                                                                                                                                                                                                                                                                                                                                                                                                                                                                                                                                                                                                                                                                                                                                                                                                                                                                                              | 0.31207  | -1.10247 |         |          |   |          |         |         |   |          |          |          |   |          |         |          |   |          |         |          |   |          |         |          |   |          |          |          |   |          |         |          |   |          |          |         |   |          |          |         |   |          |         |         |   |          |         |          |   |          |         |          |   |          |          |         |   |          |         |         |   |                                                                                                                                                                                                                                                                                                                                                                                                                                                                                                                                                                                                                                                                                                                                                                                                                                                                                                                                                                                                                                                                                                                            |         |         |          |          |          |         |          |          |          |         |         |          |         |          |          |          |         |          |          |          |         |          |         |          |         |          |         |          |          |          |          |          |          |          |          |          |          |          |         |          |          |          |          |          |          |          |         |          |         |          |         |          |          |          |          |         |          |          |         |         |          |         |   |         |         |          |                                                                                                                                                                                                                       |                                                                                                                                                                                                                                                                                                                                                                                                                                                                                                                                                                                                                                                                                                                                                                                                                                                                                                                                                                                                                                                                                                                                                                                                                                                                                                                                                                                                                                                                                                                                                                                                                                                                                                                                                                                                                                                                                                                                                                                                                                                                                                                                                                                                                                                                                                                                                              |         |          |          |         |          |          |         |         |         |         |                                                                                                                                                                                                                        |                                                                                                                                                                                                                                                                                                                                                                                                                                                                                                                                                                                                                                                                                                                                                                                                                                                                                                                                                                                                                                                                                                                                                                                                                                                                                                                                                                                                                                                                                                                                                                                                                                                                                                                                                                                                                                                                                                                                                                                                                                                                                                                                                                                                                                                                                                                                                                                                                                                                                                                                                                                      |   |          |          |          |   |          |          |          |   |          |         |          |   |         |          |          |   |          |         |          |   |          |          |          |   |         |          |          |   |          |         |         |   |          |          |         |   |          |          |         |   |          |         |          |   |          |          |          |   |          |          |         |   |          |          |          |   |          |          |          |   |          |          |         |   |          |          |         |   |          |          |          |   |          |          |          |   |          |          |          |   |          |          |          |   |          |          |          |   |          |          |          |   |          |          |         |   |         |          |          |   |          |         |         |   |          |         |         |   |         |          |          |   |         |          |          |   |         |          |          |   |         |          |          |   |          |          |          |   |         |          |          |   |          |          |          |   |          |          |          |
| O                                                                                                                                                                                                                     | -0.57872                                                                                                                                                                                                                                                                                                                                                                                                                                                                                                                                                                                                                                                                                                                                                                                                                                                                                                                                                                                                                                                                                                                                                                                                                                                                                                                                                                                                                                                                                                                                                                                                                                                                                                                                                                                                                                                                                                                                                                                                                                                                                                                                                                                                                                                                                                                                                                                                                                                                                                                                                             | 2.29404  | -1.31253 |         |          |   |          |         |         |   |          |          |          |   |          |         |          |   |          |         |          |   |          |         |          |   |          |          |          |   |          |         |          |   |          |          |         |   |          |          |         |   |          |         |         |   |          |         |          |   |          |         |          |   |          |          |         |   |          |         |         |   |                                                                                                                                                                                                                                                                                                                                                                                                                                                                                                                                                                                                                                                                                                                                                                                                                                                                                                                                                                                                                                                                                                                            |         |         |          |          |          |         |          |          |          |         |         |          |         |          |          |          |         |          |          |          |         |          |         |          |         |          |         |          |          |          |          |          |          |          |          |          |          |          |         |          |          |          |          |          |          |          |         |          |         |          |         |          |          |          |          |         |          |          |         |         |          |         |   |         |         |          |                                                                                                                                                                                                                       |                                                                                                                                                                                                                                                                                                                                                                                                                                                                                                                                                                                                                                                                                                                                                                                                                                                                                                                                                                                                                                                                                                                                                                                                                                                                                                                                                                                                                                                                                                                                                                                                                                                                                                                                                                                                                                                                                                                                                                                                                                                                                                                                                                                                                                                                                                                                                              |         |          |          |         |          |          |         |         |         |         |                                                                                                                                                                                                                        |                                                                                                                                                                                                                                                                                                                                                                                                                                                                                                                                                                                                                                                                                                                                                                                                                                                                                                                                                                                                                                                                                                                                                                                                                                                                                                                                                                                                                                                                                                                                                                                                                                                                                                                                                                                                                                                                                                                                                                                                                                                                                                                                                                                                                                                                                                                                                                                                                                                                                                                                                                                      |   |          |          |          |   |          |          |          |   |          |         |          |   |         |          |          |   |          |         |          |   |          |          |          |   |         |          |          |   |          |         |         |   |          |          |         |   |          |          |         |   |          |         |          |   |          |          |          |   |          |          |         |   |          |          |          |   |          |          |          |   |          |          |         |   |          |          |         |   |          |          |          |   |          |          |          |   |          |          |          |   |          |          |          |   |          |          |          |   |          |          |          |   |          |          |         |   |         |          |          |   |          |         |         |   |          |         |         |   |         |          |          |   |         |          |          |   |         |          |          |   |         |          |          |   |          |          |          |   |         |          |          |   |          |          |          |   |          |          |          |
| O                                                                                                                                                                                                                     | -2.37017                                                                                                                                                                                                                                                                                                                                                                                                                                                                                                                                                                                                                                                                                                                                                                                                                                                                                                                                                                                                                                                                                                                                                                                                                                                                                                                                                                                                                                                                                                                                                                                                                                                                                                                                                                                                                                                                                                                                                                                                                                                                                                                                                                                                                                                                                                                                                                                                                                                                                                                                                             | 0.68865  | 1.10803  |         |          |   |          |         |         |   |          |          |          |   |          |         |          |   |          |         |          |   |          |         |          |   |          |          |          |   |          |         |          |   |          |          |         |   |          |          |         |   |          |         |         |   |          |         |          |   |          |         |          |   |          |          |         |   |          |         |         |   |                                                                                                                                                                                                                                                                                                                                                                                                                                                                                                                                                                                                                                                                                                                                                                                                                                                                                                                                                                                                                                                                                                                            |         |         |          |          |          |         |          |          |          |         |         |          |         |          |          |          |         |          |          |          |         |          |         |          |         |          |         |          |          |          |          |          |          |          |          |          |          |          |         |          |          |          |          |          |          |          |         |          |         |          |         |          |          |          |          |         |          |          |         |         |          |         |   |         |         |          |                                                                                                                                                                                                                       |                                                                                                                                                                                                                                                                                                                                                                                                                                                                                                                                                                                                                                                                                                                                                                                                                                                                                                                                                                                                                                                                                                                                                                                                                                                                                                                                                                                                                                                                                                                                                                                                                                                                                                                                                                                                                                                                                                                                                                                                                                                                                                                                                                                                                                                                                                                                                              |         |          |          |         |          |          |         |         |         |         |                                                                                                                                                                                                                        |                                                                                                                                                                                                                                                                                                                                                                                                                                                                                                                                                                                                                                                                                                                                                                                                                                                                                                                                                                                                                                                                                                                                                                                                                                                                                                                                                                                                                                                                                                                                                                                                                                                                                                                                                                                                                                                                                                                                                                                                                                                                                                                                                                                                                                                                                                                                                                                                                                                                                                                                                                                      |   |          |          |          |   |          |          |          |   |          |         |          |   |         |          |          |   |          |         |          |   |          |          |          |   |         |          |          |   |          |         |         |   |          |          |         |   |          |          |         |   |          |         |          |   |          |          |          |   |          |          |         |   |          |          |          |   |          |          |          |   |          |          |         |   |          |          |         |   |          |          |          |   |          |          |          |   |          |          |          |   |          |          |          |   |          |          |          |   |          |          |          |   |          |          |         |   |         |          |          |   |          |         |         |   |          |         |         |   |         |          |          |   |         |          |          |   |         |          |          |   |         |          |          |   |          |          |          |   |         |          |          |   |          |          |          |   |          |          |          |
| C                                                                                                                                                                                                                     | -3.44089                                                                                                                                                                                                                                                                                                                                                                                                                                                                                                                                                                                                                                                                                                                                                                                                                                                                                                                                                                                                                                                                                                                                                                                                                                                                                                                                                                                                                                                                                                                                                                                                                                                                                                                                                                                                                                                                                                                                                                                                                                                                                                                                                                                                                                                                                                                                                                                                                                                                                                                                                             | 0.94411  | 1.99890  |         |          |   |          |         |         |   |          |          |          |   |          |         |          |   |          |         |          |   |          |         |          |   |          |          |          |   |          |         |          |   |          |          |         |   |          |          |         |   |          |         |         |   |          |         |          |   |          |         |          |   |          |          |         |   |          |         |         |   |                                                                                                                                                                                                                                                                                                                                                                                                                                                                                                                                                                                                                                                                                                                                                                                                                                                                                                                                                                                                                                                                                                                            |         |         |          |          |          |         |          |          |          |         |         |          |         |          |          |          |         |          |          |          |         |          |         |          |         |          |         |          |          |          |          |          |          |          |          |          |          |          |         |          |          |          |          |          |          |          |         |          |         |          |         |          |          |          |          |         |          |          |         |         |          |         |   |         |         |          |                                                                                                                                                                                                                       |                                                                                                                                                                                                                                                                                                                                                                                                                                                                                                                                                                                                                                                                                                                                                                                                                                                                                                                                                                                                                                                                                                                                                                                                                                                                                                                                                                                                                                                                                                                                                                                                                                                                                                                                                                                                                                                                                                                                                                                                                                                                                                                                                                                                                                                                                                                                                              |         |          |          |         |          |          |         |         |         |         |                                                                                                                                                                                                                        |                                                                                                                                                                                                                                                                                                                                                                                                                                                                                                                                                                                                                                                                                                                                                                                                                                                                                                                                                                                                                                                                                                                                                                                                                                                                                                                                                                                                                                                                                                                                                                                                                                                                                                                                                                                                                                                                                                                                                                                                                                                                                                                                                                                                                                                                                                                                                                                                                                                                                                                                                                                      |   |          |          |          |   |          |          |          |   |          |         |          |   |         |          |          |   |          |         |          |   |          |          |          |   |         |          |          |   |          |         |         |   |          |          |         |   |          |          |         |   |          |         |          |   |          |          |          |   |          |          |         |   |          |          |          |   |          |          |          |   |          |          |         |   |          |          |         |   |          |          |          |   |          |          |          |   |          |          |          |   |          |          |          |   |          |          |          |   |          |          |          |   |          |          |         |   |         |          |          |   |          |         |         |   |          |         |         |   |         |          |          |   |         |          |          |   |         |          |          |   |         |          |          |   |          |          |          |   |         |          |          |   |          |          |          |   |          |          |          |
| H                                                                                                                                                                                                                     | -4.35136                                                                                                                                                                                                                                                                                                                                                                                                                                                                                                                                                                                                                                                                                                                                                                                                                                                                                                                                                                                                                                                                                                                                                                                                                                                                                                                                                                                                                                                                                                                                                                                                                                                                                                                                                                                                                                                                                                                                                                                                                                                                                                                                                                                                                                                                                                                                                                                                                                                                                                                                                             | 0.71487  | 1.44928  |         |          |   |          |         |         |   |          |          |          |   |          |         |          |   |          |         |          |   |          |         |          |   |          |          |          |   |          |         |          |   |          |          |         |   |          |          |         |   |          |         |         |   |          |         |          |   |          |         |          |   |          |          |         |   |          |         |         |   |                                                                                                                                                                                                                                                                                                                                                                                                                                                                                                                                                                                                                                                                                                                                                                                                                                                                                                                                                                                                                                                                                                                            |         |         |          |          |          |         |          |          |          |         |         |          |         |          |          |          |         |          |          |          |         |          |         |          |         |          |         |          |          |          |          |          |          |          |          |          |          |          |         |          |          |          |          |          |          |          |         |          |         |          |         |          |          |          |          |         |          |          |         |         |          |         |   |         |         |          |                                                                                                                                                                                                                       |                                                                                                                                                                                                                                                                                                                                                                                                                                                                                                                                                                                                                                                                                                                                                                                                                                                                                                                                                                                                                                                                                                                                                                                                                                                                                                                                                                                                                                                                                                                                                                                                                                                                                                                                                                                                                                                                                                                                                                                                                                                                                                                                                                                                                                                                                                                                                              |         |          |          |         |          |          |         |         |         |         |                                                                                                                                                                                                                        |                                                                                                                                                                                                                                                                                                                                                                                                                                                                                                                                                                                                                                                                                                                                                                                                                                                                                                                                                                                                                                                                                                                                                                                                                                                                                                                                                                                                                                                                                                                                                                                                                                                                                                                                                                                                                                                                                                                                                                                                                                                                                                                                                                                                                                                                                                                                                                                                                                                                                                                                                                                      |   |          |          |          |   |          |          |          |   |          |         |          |   |         |          |          |   |          |         |          |   |          |          |          |   |         |          |          |   |          |         |         |   |          |          |         |   |          |          |         |   |          |         |          |   |          |          |          |   |          |          |         |   |          |          |          |   |          |          |          |   |          |          |         |   |          |          |         |   |          |          |          |   |          |          |          |   |          |          |          |   |          |          |          |   |          |          |          |   |          |          |          |   |          |          |         |   |         |          |          |   |          |         |         |   |          |         |         |   |         |          |          |   |         |          |          |   |         |          |          |   |         |          |          |   |          |          |          |   |         |          |          |   |          |          |          |   |          |          |          |
| H                                                                                                                                                                                                                     | -3.45395                                                                                                                                                                                                                                                                                                                                                                                                                                                                                                                                                                                                                                                                                                                                                                                                                                                                                                                                                                                                                                                                                                                                                                                                                                                                                                                                                                                                                                                                                                                                                                                                                                                                                                                                                                                                                                                                                                                                                                                                                                                                                                                                                                                                                                                                                                                                                                                                                                                                                                                                                             | 1.99353  | 2.31180  |         |          |   |          |         |         |   |          |          |          |   |          |         |          |   |          |         |          |   |          |         |          |   |          |          |          |   |          |         |          |   |          |          |         |   |          |          |         |   |          |         |         |   |          |         |          |   |          |         |          |   |          |          |         |   |          |         |         |   |                                                                                                                                                                                                                                                                                                                                                                                                                                                                                                                                                                                                                                                                                                                                                                                                                                                                                                                                                                                                                                                                                                                            |         |         |          |          |          |         |          |          |          |         |         |          |         |          |          |          |         |          |          |          |         |          |         |          |         |          |         |          |          |          |          |          |          |          |          |          |          |          |         |          |          |          |          |          |          |          |         |          |         |          |         |          |          |          |          |         |          |          |         |         |          |         |   |         |         |          |                                                                                                                                                                                                                       |                                                                                                                                                                                                                                                                                                                                                                                                                                                                                                                                                                                                                                                                                                                                                                                                                                                                                                                                                                                                                                                                                                                                                                                                                                                                                                                                                                                                                                                                                                                                                                                                                                                                                                                                                                                                                                                                                                                                                                                                                                                                                                                                                                                                                                                                                                                                                              |         |          |          |         |          |          |         |         |         |         |                                                                                                                                                                                                                        |                                                                                                                                                                                                                                                                                                                                                                                                                                                                                                                                                                                                                                                                                                                                                                                                                                                                                                                                                                                                                                                                                                                                                                                                                                                                                                                                                                                                                                                                                                                                                                                                                                                                                                                                                                                                                                                                                                                                                                                                                                                                                                                                                                                                                                                                                                                                                                                                                                                                                                                                                                                      |   |          |          |          |   |          |          |          |   |          |         |          |   |         |          |          |   |          |         |          |   |          |          |          |   |         |          |          |   |          |         |         |   |          |          |         |   |          |          |         |   |          |         |          |   |          |          |          |   |          |          |         |   |          |          |          |   |          |          |          |   |          |          |         |   |          |          |         |   |          |          |          |   |          |          |          |   |          |          |          |   |          |          |          |   |          |          |          |   |          |          |          |   |          |          |         |   |         |          |          |   |          |         |         |   |          |         |         |   |         |          |          |   |         |          |          |   |         |          |          |   |         |          |          |   |          |          |          |   |         |          |          |   |          |          |          |   |          |          |          |
| H                                                                                                                                                                                                                     | -3.37391                                                                                                                                                                                                                                                                                                                                                                                                                                                                                                                                                                                                                                                                                                                                                                                                                                                                                                                                                                                                                                                                                                                                                                                                                                                                                                                                                                                                                                                                                                                                                                                                                                                                                                                                                                                                                                                                                                                                                                                                                                                                                                                                                                                                                                                                                                                                                                                                                                                                                                                                                             | 0.30628  | 2.88607  |         |          |   |          |         |         |   |          |          |          |   |          |         |          |   |          |         |          |   |          |         |          |   |          |          |          |   |          |         |          |   |          |          |         |   |          |          |         |   |          |         |         |   |          |         |          |   |          |         |          |   |          |          |         |   |          |         |         |   |                                                                                                                                                                                                                                                                                                                                                                                                                                                                                                                                                                                                                                                                                                                                                                                                                                                                                                                                                                                                                                                                                                                            |         |         |          |          |          |         |          |          |          |         |         |          |         |          |          |          |         |          |          |          |         |          |         |          |         |          |         |          |          |          |          |          |          |          |          |          |          |          |         |          |          |          |          |          |          |          |         |          |         |          |         |          |          |          |          |         |          |          |         |         |          |         |   |         |         |          |                                                                                                                                                                                                                       |                                                                                                                                                                                                                                                                                                                                                                                                                                                                                                                                                                                                                                                                                                                                                                                                                                                                                                                                                                                                                                                                                                                                                                                                                                                                                                                                                                                                                                                                                                                                                                                                                                                                                                                                                                                                                                                                                                                                                                                                                                                                                                                                                                                                                                                                                                                                                              |         |          |          |         |          |          |         |         |         |         |                                                                                                                                                                                                                        |                                                                                                                                                                                                                                                                                                                                                                                                                                                                                                                                                                                                                                                                                                                                                                                                                                                                                                                                                                                                                                                                                                                                                                                                                                                                                                                                                                                                                                                                                                                                                                                                                                                                                                                                                                                                                                                                                                                                                                                                                                                                                                                                                                                                                                                                                                                                                                                                                                                                                                                                                                                      |   |          |          |          |   |          |          |          |   |          |         |          |   |         |          |          |   |          |         |          |   |          |          |          |   |         |          |          |   |          |         |         |   |          |          |         |   |          |          |         |   |          |         |          |   |          |          |          |   |          |          |         |   |          |          |          |   |          |          |          |   |          |          |         |   |          |          |         |   |          |          |          |   |          |          |          |   |          |          |          |   |          |          |          |   |          |          |          |   |          |          |          |   |          |          |         |   |         |          |          |   |          |         |         |   |          |         |         |   |         |          |          |   |         |          |          |   |         |          |          |   |         |          |          |   |          |          |          |   |         |          |          |   |          |          |          |   |          |          |          |
| C                                                                                                                                                                                                                     | -0.76026                                                                                                                                                                                                                                                                                                                                                                                                                                                                                                                                                                                                                                                                                                                                                                                                                                                                                                                                                                                                                                                                                                                                                                                                                                                                                                                                                                                                                                                                                                                                                                                                                                                                                                                                                                                                                                                                                                                                                                                                                                                                                                                                                                                                                                                                                                                                                                                                                                                                                                                                                             | 3.30289  | -2.28958 |         |          |   |          |         |         |   |          |          |          |   |          |         |          |   |          |         |          |   |          |         |          |   |          |          |          |   |          |         |          |   |          |          |         |   |          |          |         |   |          |         |         |   |          |         |          |   |          |         |          |   |          |          |         |   |          |         |         |   |                                                                                                                                                                                                                                                                                                                                                                                                                                                                                                                                                                                                                                                                                                                                                                                                                                                                                                                                                                                                                                                                                                                            |         |         |          |          |          |         |          |          |          |         |         |          |         |          |          |          |         |          |          |          |         |          |         |          |         |          |         |          |          |          |          |          |          |          |          |          |          |          |         |          |          |          |          |          |          |          |         |          |         |          |         |          |          |          |          |         |          |          |         |         |          |         |   |         |         |          |                                                                                                                                                                                                                       |                                                                                                                                                                                                                                                                                                                                                                                                                                                                                                                                                                                                                                                                                                                                                                                                                                                                                                                                                                                                                                                                                                                                                                                                                                                                                                                                                                                                                                                                                                                                                                                                                                                                                                                                                                                                                                                                                                                                                                                                                                                                                                                                                                                                                                                                                                                                                              |         |          |          |         |          |          |         |         |         |         |                                                                                                                                                                                                                        |                                                                                                                                                                                                                                                                                                                                                                                                                                                                                                                                                                                                                                                                                                                                                                                                                                                                                                                                                                                                                                                                                                                                                                                                                                                                                                                                                                                                                                                                                                                                                                                                                                                                                                                                                                                                                                                                                                                                                                                                                                                                                                                                                                                                                                                                                                                                                                                                                                                                                                                                                                                      |   |          |          |          |   |          |          |          |   |          |         |          |   |         |          |          |   |          |         |          |   |          |          |          |   |         |          |          |   |          |         |         |   |          |          |         |   |          |          |         |   |          |         |          |   |          |          |          |   |          |          |         |   |          |          |          |   |          |          |          |   |          |          |         |   |          |          |         |   |          |          |          |   |          |          |          |   |          |          |          |   |          |          |          |   |          |          |          |   |          |          |          |   |          |          |         |   |         |          |          |   |          |         |         |   |          |         |         |   |         |          |          |   |         |          |          |   |         |          |          |   |         |          |          |   |          |          |          |   |         |          |          |   |          |          |          |   |          |          |          |
| H                                                                                                                                                                                                                     | -1.78603                                                                                                                                                                                                                                                                                                                                                                                                                                                                                                                                                                                                                                                                                                                                                                                                                                                                                                                                                                                                                                                                                                                                                                                                                                                                                                                                                                                                                                                                                                                                                                                                                                                                                                                                                                                                                                                                                                                                                                                                                                                                                                                                                                                                                                                                                                                                                                                                                                                                                                                                                             | 3.30260  | -2.67323 |         |          |   |          |         |         |   |          |          |          |   |          |         |          |   |          |         |          |   |          |         |          |   |          |          |          |   |          |         |          |   |          |          |         |   |          |          |         |   |          |         |         |   |          |         |          |   |          |         |          |   |          |          |         |   |          |         |         |   |                                                                                                                                                                                                                                                                                                                                                                                                                                                                                                                                                                                                                                                                                                                                                                                                                                                                                                                                                                                                                                                                                                                            |         |         |          |          |          |         |          |          |          |         |         |          |         |          |          |          |         |          |          |          |         |          |         |          |         |          |         |          |          |          |          |          |          |          |          |          |          |          |         |          |          |          |          |          |          |          |         |          |         |          |         |          |          |          |          |         |          |          |         |         |          |         |   |         |         |          |                                                                                                                                                                                                                       |                                                                                                                                                                                                                                                                                                                                                                                                                                                                                                                                                                                                                                                                                                                                                                                                                                                                                                                                                                                                                                                                                                                                                                                                                                                                                                                                                                                                                                                                                                                                                                                                                                                                                                                                                                                                                                                                                                                                                                                                                                                                                                                                                                                                                                                                                                                                                              |         |          |          |         |          |          |         |         |         |         |                                                                                                                                                                                                                        |                                                                                                                                                                                                                                                                                                                                                                                                                                                                                                                                                                                                                                                                                                                                                                                                                                                                                                                                                                                                                                                                                                                                                                                                                                                                                                                                                                                                                                                                                                                                                                                                                                                                                                                                                                                                                                                                                                                                                                                                                                                                                                                                                                                                                                                                                                                                                                                                                                                                                                                                                                                      |   |          |          |          |   |          |          |          |   |          |         |          |   |         |          |          |   |          |         |          |   |          |          |          |   |         |          |          |   |          |         |         |   |          |          |         |   |          |          |         |   |          |         |          |   |          |          |          |   |          |          |         |   |          |          |          |   |          |          |          |   |          |          |         |   |          |          |         |   |          |          |          |   |          |          |          |   |          |          |          |   |          |          |          |   |          |          |          |   |          |          |          |   |          |          |         |   |         |          |          |   |          |         |         |   |          |         |         |   |         |          |          |   |         |          |          |   |         |          |          |   |         |          |          |   |          |          |          |   |         |          |          |   |          |          |          |   |          |          |          |
| H                                                                                                                                                                                                                     | -0.06507                                                                                                                                                                                                                                                                                                                                                                                                                                                                                                                                                                                                                                                                                                                                                                                                                                                                                                                                                                                                                                                                                                                                                                                                                                                                                                                                                                                                                                                                                                                                                                                                                                                                                                                                                                                                                                                                                                                                                                                                                                                                                                                                                                                                                                                                                                                                                                                                                                                                                                                                                             | 3.17002  | -3.12467 |         |          |   |          |         |         |   |          |          |          |   |          |         |          |   |          |         |          |   |          |         |          |   |          |          |          |   |          |         |          |   |          |          |         |   |          |          |         |   |          |         |         |   |          |         |          |   |          |         |          |   |          |          |         |   |          |         |         |   |                                                                                                                                                                                                                                                                                                                                                                                                                                                                                                                                                                                                                                                                                                                                                                                                                                                                                                                                                                                                                                                                                                                            |         |         |          |          |          |         |          |          |          |         |         |          |         |          |          |          |         |          |          |          |         |          |         |          |         |          |         |          |          |          |          |          |          |          |          |          |          |          |         |          |          |          |          |          |          |          |         |          |         |          |         |          |          |          |          |         |          |          |         |         |          |         |   |         |         |          |                                                                                                                                                                                                                       |                                                                                                                                                                                                                                                                                                                                                                                                                                                                                                                                                                                                                                                                                                                                                                                                                                                                                                                                                                                                                                                                                                                                                                                                                                                                                                                                                                                                                                                                                                                                                                                                                                                                                                                                                                                                                                                                                                                                                                                                                                                                                                                                                                                                                                                                                                                                                              |         |          |          |         |          |          |         |         |         |         |                                                                                                                                                                                                                        |                                                                                                                                                                                                                                                                                                                                                                                                                                                                                                                                                                                                                                                                                                                                                                                                                                                                                                                                                                                                                                                                                                                                                                                                                                                                                                                                                                                                                                                                                                                                                                                                                                                                                                                                                                                                                                                                                                                                                                                                                                                                                                                                                                                                                                                                                                                                                                                                                                                                                                                                                                                      |   |          |          |          |   |          |          |          |   |          |         |          |   |         |          |          |   |          |         |          |   |          |          |          |   |         |          |          |   |          |         |         |   |          |          |         |   |          |          |         |   |          |         |          |   |          |          |          |   |          |          |         |   |          |          |          |   |          |          |          |   |          |          |         |   |          |          |         |   |          |          |          |   |          |          |          |   |          |          |          |   |          |          |          |   |          |          |          |   |          |          |          |   |          |          |         |   |         |          |          |   |          |         |         |   |          |         |         |   |         |          |          |   |         |          |          |   |         |          |          |   |         |          |          |   |          |          |          |   |         |          |          |   |          |          |          |   |          |          |          |
| H                                                                                                                                                                                                                     | -0.55721                                                                                                                                                                                                                                                                                                                                                                                                                                                                                                                                                                                                                                                                                                                                                                                                                                                                                                                                                                                                                                                                                                                                                                                                                                                                                                                                                                                                                                                                                                                                                                                                                                                                                                                                                                                                                                                                                                                                                                                                                                                                                                                                                                                                                                                                                                                                                                                                                                                                                                                                                             | 4.24721  | -1.78895 |         |          |   |          |         |         |   |          |          |          |   |          |         |          |   |          |         |          |   |          |         |          |   |          |          |          |   |          |         |          |   |          |          |         |   |          |          |         |   |          |         |         |   |          |         |          |   |          |         |          |   |          |          |         |   |          |         |         |   |                                                                                                                                                                                                                                                                                                                                                                                                                                                                                                                                                                                                                                                                                                                                                                                                                                                                                                                                                                                                                                                                                                                            |         |         |          |          |          |         |          |          |          |         |         |          |         |          |          |          |         |          |          |          |         |          |         |          |         |          |         |          |          |          |          |          |          |          |          |          |          |          |         |          |          |          |          |          |          |          |         |          |         |          |         |          |          |          |          |         |          |          |         |         |          |         |   |         |         |          |                                                                                                                                                                                                                       |                                                                                                                                                                                                                                                                                                                                                                                                                                                                                                                                                                                                                                                                                                                                                                                                                                                                                                                                                                                                                                                                                                                                                                                                                                                                                                                                                                                                                                                                                                                                                                                                                                                                                                                                                                                                                                                                                                                                                                                                                                                                                                                                                                                                                                                                                                                                                              |         |          |          |         |          |          |         |         |         |         |                                                                                                                                                                                                                        |                                                                                                                                                                                                                                                                                                                                                                                                                                                                                                                                                                                                                                                                                                                                                                                                                                                                                                                                                                                                                                                                                                                                                                                                                                                                                                                                                                                                                                                                                                                                                                                                                                                                                                                                                                                                                                                                                                                                                                                                                                                                                                                                                                                                                                                                                                                                                                                                                                                                                                                                                                                      |   |          |          |          |   |          |          |          |   |          |         |          |   |         |          |          |   |          |         |          |   |          |          |          |   |         |          |          |   |          |         |         |   |          |          |         |   |          |          |         |   |          |         |          |   |          |          |          |   |          |          |         |   |          |          |          |   |          |          |          |   |          |          |         |   |          |          |         |   |          |          |          |   |          |          |          |   |          |          |          |   |          |          |          |   |          |          |          |   |          |          |          |   |          |          |         |   |         |          |          |   |          |         |         |   |          |         |         |   |         |          |          |   |         |          |          |   |         |          |          |   |         |          |          |   |          |          |          |   |         |          |          |   |          |          |          |   |          |          |          |
| O                                                                                                                                                                                                                     | -0.17309                                                                                                                                                                                                                                                                                                                                                                                                                                                                                                                                                                                                                                                                                                                                                                                                                                                                                                                                                                                                                                                                                                                                                                                                                                                                                                                                                                                                                                                                                                                                                                                                                                                                                                                                                                                                                                                                                                                                                                                                                                                                                                                                                                                                                                                                                                                                                                                                                                                                                                                                                             | -3.57106 | -0.50433 |         |          |   |          |         |         |   |          |          |          |   |          |         |          |   |          |         |          |   |          |         |          |   |          |          |          |   |          |         |          |   |          |          |         |   |          |          |         |   |          |         |         |   |          |         |          |   |          |         |          |   |          |          |         |   |          |         |         |   |                                                                                                                                                                                                                                                                                                                                                                                                                                                                                                                                                                                                                                                                                                                                                                                                                                                                                                                                                                                                                                                                                                                            |         |         |          |          |          |         |          |          |          |         |         |          |         |          |          |          |         |          |          |          |         |          |         |          |         |          |         |          |          |          |          |          |          |          |          |          |          |          |         |          |          |          |          |          |          |          |         |          |         |          |         |          |          |          |          |         |          |          |         |         |          |         |   |         |         |          |                                                                                                                                                                                                                       |                                                                                                                                                                                                                                                                                                                                                                                                                                                                                                                                                                                                                                                                                                                                                                                                                                                                                                                                                                                                                                                                                                                                                                                                                                                                                                                                                                                                                                                                                                                                                                                                                                                                                                                                                                                                                                                                                                                                                                                                                                                                                                                                                                                                                                                                                                                                                              |         |          |          |         |          |          |         |         |         |         |                                                                                                                                                                                                                        |                                                                                                                                                                                                                                                                                                                                                                                                                                                                                                                                                                                                                                                                                                                                                                                                                                                                                                                                                                                                                                                                                                                                                                                                                                                                                                                                                                                                                                                                                                                                                                                                                                                                                                                                                                                                                                                                                                                                                                                                                                                                                                                                                                                                                                                                                                                                                                                                                                                                                                                                                                                      |   |          |          |          |   |          |          |          |   |          |         |          |   |         |          |          |   |          |         |          |   |          |          |          |   |         |          |          |   |          |         |         |   |          |          |         |   |          |          |         |   |          |         |          |   |          |          |          |   |          |          |         |   |          |          |          |   |          |          |          |   |          |          |         |   |          |          |         |   |          |          |          |   |          |          |          |   |          |          |          |   |          |          |          |   |          |          |          |   |          |          |          |   |          |          |         |   |         |          |          |   |          |         |         |   |          |         |         |   |         |          |          |   |         |          |          |   |         |          |          |   |         |          |          |   |          |          |          |   |         |          |          |   |          |          |          |   |          |          |          |
| C                                                                                                                                                                                                                     | 0.02202                                                                                                                                                                                                                                                                                                                                                                                                                                                                                                                                                                                                                                                                                                                                                                                                                                                                                                                                                                                                                                                                                                                                                                                                                                                                                                                                                                                                                                                                                                                                                                                                                                                                                                                                                                                                                                                                                                                                                                                                                                                                                                                                                                                                                                                                                                                                                                                                                                                                                                                                                              | -4.63228 | 0.43973  |         |          |   |          |         |         |   |          |          |          |   |          |         |          |   |          |         |          |   |          |         |          |   |          |          |          |   |          |         |          |   |          |          |         |   |          |          |         |   |          |         |         |   |          |         |          |   |          |         |          |   |          |          |         |   |          |         |         |   |                                                                                                                                                                                                                                                                                                                                                                                                                                                                                                                                                                                                                                                                                                                                                                                                                                                                                                                                                                                                                                                                                                                            |         |         |          |          |          |         |          |          |          |         |         |          |         |          |          |          |         |          |          |          |         |          |         |          |         |          |         |          |          |          |          |          |          |          |          |          |          |          |         |          |          |          |          |          |          |          |         |          |         |          |         |          |          |          |          |         |          |          |         |         |          |         |   |         |         |          |                                                                                                                                                                                                                       |                                                                                                                                                                                                                                                                                                                                                                                                                                                                                                                                                                                                                                                                                                                                                                                                                                                                                                                                                                                                                                                                                                                                                                                                                                                                                                                                                                                                                                                                                                                                                                                                                                                                                                                                                                                                                                                                                                                                                                                                                                                                                                                                                                                                                                                                                                                                                              |         |          |          |         |          |          |         |         |         |         |                                                                                                                                                                                                                        |                                                                                                                                                                                                                                                                                                                                                                                                                                                                                                                                                                                                                                                                                                                                                                                                                                                                                                                                                                                                                                                                                                                                                                                                                                                                                                                                                                                                                                                                                                                                                                                                                                                                                                                                                                                                                                                                                                                                                                                                                                                                                                                                                                                                                                                                                                                                                                                                                                                                                                                                                                                      |   |          |          |          |   |          |          |          |   |          |         |          |   |         |          |          |   |          |         |          |   |          |          |          |   |         |          |          |   |          |         |         |   |          |          |         |   |          |          |         |   |          |         |          |   |          |          |          |   |          |          |         |   |          |          |          |   |          |          |          |   |          |          |         |   |          |          |         |   |          |          |          |   |          |          |          |   |          |          |          |   |          |          |          |   |          |          |          |   |          |          |          |   |          |          |         |   |         |          |          |   |          |         |         |   |          |         |         |   |         |          |          |   |         |          |          |   |         |          |          |   |         |          |          |   |          |          |          |   |         |          |          |   |          |          |          |   |          |          |          |
| H                                                                                                                                                                                                                     | 0.18764                                                                                                                                                                                                                                                                                                                                                                                                                                                                                                                                                                                                                                                                                                                                                                                                                                                                                                                                                                                                                                                                                                                                                                                                                                                                                                                                                                                                                                                                                                                                                                                                                                                                                                                                                                                                                                                                                                                                                                                                                                                                                                                                                                                                                                                                                                                                                                                                                                                                                                                                                              | -5.52701 | -0.15561 |         |          |   |          |         |         |   |          |          |          |   |          |         |          |   |          |         |          |   |          |         |          |   |          |          |          |   |          |         |          |   |          |          |         |   |          |          |         |   |          |         |         |   |          |         |          |   |          |         |          |   |          |          |         |   |          |         |         |   |                                                                                                                                                                                                                                                                                                                                                                                                                                                                                                                                                                                                                                                                                                                                                                                                                                                                                                                                                                                                                                                                                                                            |         |         |          |          |          |         |          |          |          |         |         |          |         |          |          |          |         |          |          |          |         |          |         |          |         |          |         |          |          |          |          |          |          |          |          |          |          |          |         |          |          |          |          |          |          |          |         |          |         |          |         |          |          |          |          |         |          |          |         |         |          |         |   |         |         |          |                                                                                                                                                                                                                       |                                                                                                                                                                                                                                                                                                                                                                                                                                                                                                                                                                                                                                                                                                                                                                                                                                                                                                                                                                                                                                                                                                                                                                                                                                                                                                                                                                                                                                                                                                                                                                                                                                                                                                                                                                                                                                                                                                                                                                                                                                                                                                                                                                                                                                                                                                                                                              |         |          |          |         |          |          |         |         |         |         |                                                                                                                                                                                                                        |                                                                                                                                                                                                                                                                                                                                                                                                                                                                                                                                                                                                                                                                                                                                                                                                                                                                                                                                                                                                                                                                                                                                                                                                                                                                                                                                                                                                                                                                                                                                                                                                                                                                                                                                                                                                                                                                                                                                                                                                                                                                                                                                                                                                                                                                                                                                                                                                                                                                                                                                                                                      |   |          |          |          |   |          |          |          |   |          |         |          |   |         |          |          |   |          |         |          |   |          |          |          |   |         |          |          |   |          |         |         |   |          |          |         |   |          |          |         |   |          |         |          |   |          |          |          |   |          |          |         |   |          |          |          |   |          |          |          |   |          |          |         |   |          |          |         |   |          |          |          |   |          |          |          |   |          |          |          |   |          |          |          |   |          |          |          |   |          |          |          |   |          |          |         |   |         |          |          |   |          |         |         |   |          |         |         |   |         |          |          |   |         |          |          |   |         |          |          |   |         |          |          |   |          |          |          |   |         |          |          |   |          |          |          |   |          |          |          |
| H                                                                                                                                                                                                                     | -0.85867                                                                                                                                                                                                                                                                                                                                                                                                                                                                                                                                                                                                                                                                                                                                                                                                                                                                                                                                                                                                                                                                                                                                                                                                                                                                                                                                                                                                                                                                                                                                                                                                                                                                                                                                                                                                                                                                                                                                                                                                                                                                                                                                                                                                                                                                                                                                                                                                                                                                                                                                                             | -4.74564 | 1.07308  |         |          |   |          |         |         |   |          |          |          |   |          |         |          |   |          |         |          |   |          |         |          |   |          |          |          |   |          |         |          |   |          |          |         |   |          |          |         |   |          |         |         |   |          |         |          |   |          |         |          |   |          |          |         |   |          |         |         |   |                                                                                                                                                                                                                                                                                                                                                                                                                                                                                                                                                                                                                                                                                                                                                                                                                                                                                                                                                                                                                                                                                                                            |         |         |          |          |          |         |          |          |          |         |         |          |         |          |          |          |         |          |          |          |         |          |         |          |         |          |         |          |          |          |          |          |          |          |          |          |          |          |         |          |          |          |          |          |          |          |         |          |         |          |         |          |          |          |          |         |          |          |         |         |          |         |   |         |         |          |                                                                                                                                                                                                                       |                                                                                                                                                                                                                                                                                                                                                                                                                                                                                                                                                                                                                                                                                                                                                                                                                                                                                                                                                                                                                                                                                                                                                                                                                                                                                                                                                                                                                                                                                                                                                                                                                                                                                                                                                                                                                                                                                                                                                                                                                                                                                                                                                                                                                                                                                                                                                              |         |          |          |         |          |          |         |         |         |         |                                                                                                                                                                                                                        |                                                                                                                                                                                                                                                                                                                                                                                                                                                                                                                                                                                                                                                                                                                                                                                                                                                                                                                                                                                                                                                                                                                                                                                                                                                                                                                                                                                                                                                                                                                                                                                                                                                                                                                                                                                                                                                                                                                                                                                                                                                                                                                                                                                                                                                                                                                                                                                                                                                                                                                                                                                      |   |          |          |          |   |          |          |          |   |          |         |          |   |         |          |          |   |          |         |          |   |          |          |          |   |         |          |          |   |          |         |         |   |          |          |         |   |          |          |         |   |          |         |          |   |          |          |          |   |          |          |         |   |          |          |          |   |          |          |          |   |          |          |         |   |          |          |         |   |          |          |          |   |          |          |          |   |          |          |          |   |          |          |          |   |          |          |          |   |          |          |          |   |          |          |         |   |         |          |          |   |          |         |         |   |          |         |         |   |         |          |          |   |         |          |          |   |         |          |          |   |         |          |          |   |          |          |          |   |         |          |          |   |          |          |          |   |          |          |          |
| H                                                                                                                                                                                                                     | 0.88488                                                                                                                                                                                                                                                                                                                                                                                                                                                                                                                                                                                                                                                                                                                                                                                                                                                                                                                                                                                                                                                                                                                                                                                                                                                                                                                                                                                                                                                                                                                                                                                                                                                                                                                                                                                                                                                                                                                                                                                                                                                                                                                                                                                                                                                                                                                                                                                                                                                                                                                                                              | -4.42342 | 1.07304  |         |          |   |          |         |         |   |          |          |          |   |          |         |          |   |          |         |          |   |          |         |          |   |          |          |          |   |          |         |          |   |          |          |         |   |          |          |         |   |          |         |         |   |          |         |          |   |          |         |          |   |          |          |         |   |          |         |         |   |                                                                                                                                                                                                                                                                                                                                                                                                                                                                                                                                                                                                                                                                                                                                                                                                                                                                                                                                                                                                                                                                                                                            |         |         |          |          |          |         |          |          |          |         |         |          |         |          |          |          |         |          |          |          |         |          |         |          |         |          |         |          |          |          |          |          |          |          |          |          |          |          |         |          |          |          |          |          |          |          |         |          |         |          |         |          |          |          |          |         |          |          |         |         |          |         |   |         |         |          |                                                                                                                                                                                                                       |                                                                                                                                                                                                                                                                                                                                                                                                                                                                                                                                                                                                                                                                                                                                                                                                                                                                                                                                                                                                                                                                                                                                                                                                                                                                                                                                                                                                                                                                                                                                                                                                                                                                                                                                                                                                                                                                                                                                                                                                                                                                                                                                                                                                                                                                                                                                                              |         |          |          |         |          |          |         |         |         |         |                                                                                                                                                                                                                        |                                                                                                                                                                                                                                                                                                                                                                                                                                                                                                                                                                                                                                                                                                                                                                                                                                                                                                                                                                                                                                                                                                                                                                                                                                                                                                                                                                                                                                                                                                                                                                                                                                                                                                                                                                                                                                                                                                                                                                                                                                                                                                                                                                                                                                                                                                                                                                                                                                                                                                                                                                                      |   |          |          |          |   |          |          |          |   |          |         |          |   |         |          |          |   |          |         |          |   |          |          |          |   |         |          |          |   |          |         |         |   |          |          |         |   |          |          |         |   |          |         |          |   |          |          |          |   |          |          |         |   |          |          |          |   |          |          |          |   |          |          |         |   |          |          |         |   |          |          |          |   |          |          |          |   |          |          |          |   |          |          |          |   |          |          |          |   |          |          |          |   |          |          |         |   |         |          |          |   |          |         |         |   |          |         |         |   |         |          |          |   |         |          |          |   |         |          |          |   |         |          |          |   |          |          |          |   |         |          |          |   |          |          |          |   |          |          |          |
| O                                                                                                                                                                                                                     | 3.53030                                                                                                                                                                                                                                                                                                                                                                                                                                                                                                                                                                                                                                                                                                                                                                                                                                                                                                                                                                                                                                                                                                                                                                                                                                                                                                                                                                                                                                                                                                                                                                                                                                                                                                                                                                                                                                                                                                                                                                                                                                                                                                                                                                                                                                                                                                                                                                                                                                                                                                                                                              | 0.17530  | 0.73668  |         |          |   |          |         |         |   |          |          |          |   |          |         |          |   |          |         |          |   |          |         |          |   |          |          |          |   |          |         |          |   |          |          |         |   |          |          |         |   |          |         |         |   |          |         |          |   |          |         |          |   |          |          |         |   |          |         |         |   |                                                                                                                                                                                                                                                                                                                                                                                                                                                                                                                                                                                                                                                                                                                                                                                                                                                                                                                                                                                                                                                                                                                            |         |         |          |          |          |         |          |          |          |         |         |          |         |          |          |          |         |          |          |          |         |          |         |          |         |          |         |          |          |          |          |          |          |          |          |          |          |          |         |          |          |          |          |          |          |          |         |          |         |          |         |          |          |          |          |         |          |          |         |         |          |         |   |         |         |          |                                                                                                                                                                                                                       |                                                                                                                                                                                                                                                                                                                                                                                                                                                                                                                                                                                                                                                                                                                                                                                                                                                                                                                                                                                                                                                                                                                                                                                                                                                                                                                                                                                                                                                                                                                                                                                                                                                                                                                                                                                                                                                                                                                                                                                                                                                                                                                                                                                                                                                                                                                                                              |         |          |          |         |          |          |         |         |         |         |                                                                                                                                                                                                                        |                                                                                                                                                                                                                                                                                                                                                                                                                                                                                                                                                                                                                                                                                                                                                                                                                                                                                                                                                                                                                                                                                                                                                                                                                                                                                                                                                                                                                                                                                                                                                                                                                                                                                                                                                                                                                                                                                                                                                                                                                                                                                                                                                                                                                                                                                                                                                                                                                                                                                                                                                                                      |   |          |          |          |   |          |          |          |   |          |         |          |   |         |          |          |   |          |         |          |   |          |          |          |   |         |          |          |   |          |         |         |   |          |          |         |   |          |          |         |   |          |         |          |   |          |          |          |   |          |          |         |   |          |          |          |   |          |          |          |   |          |          |         |   |          |          |         |   |          |          |          |   |          |          |          |   |          |          |          |   |          |          |          |   |          |          |          |   |          |          |          |   |          |          |         |   |         |          |          |   |          |         |         |   |          |         |         |   |         |          |          |   |         |          |          |   |         |          |          |   |         |          |          |   |          |          |          |   |         |          |          |   |          |          |          |   |          |          |          |
| C                                                                                                                                                                                                                     | 4.65112                                                                                                                                                                                                                                                                                                                                                                                                                                                                                                                                                                                                                                                                                                                                                                                                                                                                                                                                                                                                                                                                                                                                                                                                                                                                                                                                                                                                                                                                                                                                                                                                                                                                                                                                                                                                                                                                                                                                                                                                                                                                                                                                                                                                                                                                                                                                                                                                                                                                                                                                                              | -0.09188 | -0.11654 |         |          |   |          |         |         |   |          |          |          |   |          |         |          |   |          |         |          |   |          |         |          |   |          |          |          |   |          |         |          |   |          |          |         |   |          |          |         |   |          |         |         |   |          |         |          |   |          |         |          |   |          |          |         |   |          |         |         |   |                                                                                                                                                                                                                                                                                                                                                                                                                                                                                                                                                                                                                                                                                                                                                                                                                                                                                                                                                                                                                                                                                                                            |         |         |          |          |          |         |          |          |          |         |         |          |         |          |          |          |         |          |          |          |         |          |         |          |         |          |         |          |          |          |          |          |          |          |          |          |          |          |         |          |          |          |          |          |          |          |         |          |         |          |         |          |          |          |          |         |          |          |         |         |          |         |   |         |         |          |                                                                                                                                                                                                                       |                                                                                                                                                                                                                                                                                                                                                                                                                                                                                                                                                                                                                                                                                                                                                                                                                                                                                                                                                                                                                                                                                                                                                                                                                                                                                                                                                                                                                                                                                                                                                                                                                                                                                                                                                                                                                                                                                                                                                                                                                                                                                                                                                                                                                                                                                                                                                              |         |          |          |         |          |          |         |         |         |         |                                                                                                                                                                                                                        |                                                                                                                                                                                                                                                                                                                                                                                                                                                                                                                                                                                                                                                                                                                                                                                                                                                                                                                                                                                                                                                                                                                                                                                                                                                                                                                                                                                                                                                                                                                                                                                                                                                                                                                                                                                                                                                                                                                                                                                                                                                                                                                                                                                                                                                                                                                                                                                                                                                                                                                                                                                      |   |          |          |          |   |          |          |          |   |          |         |          |   |         |          |          |   |          |         |          |   |          |          |          |   |         |          |          |   |          |         |         |   |          |          |         |   |          |          |         |   |          |         |          |   |          |          |          |   |          |          |         |   |          |          |          |   |          |          |          |   |          |          |         |   |          |          |         |   |          |          |          |   |          |          |          |   |          |          |          |   |          |          |          |   |          |          |          |   |          |          |          |   |          |          |         |   |         |          |          |   |          |         |         |   |          |         |         |   |         |          |          |   |         |          |          |   |         |          |          |   |         |          |          |   |          |          |          |   |         |          |          |   |          |          |          |   |          |          |          |
| H                                                                                                                                                                                                                     | 4.47488                                                                                                                                                                                                                                                                                                                                                                                                                                                                                                                                                                                                                                                                                                                                                                                                                                                                                                                                                                                                                                                                                                                                                                                                                                                                                                                                                                                                                                                                                                                                                                                                                                                                                                                                                                                                                                                                                                                                                                                                                                                                                                                                                                                                                                                                                                                                                                                                                                                                                                                                                              | -0.99356 | -0.70399 |         |          |   |          |         |         |   |          |          |          |   |          |         |          |   |          |         |          |   |          |         |          |   |          |          |          |   |          |         |          |   |          |          |         |   |          |          |         |   |          |         |         |   |          |         |          |   |          |         |          |   |          |          |         |   |          |         |         |   |                                                                                                                                                                                                                                                                                                                                                                                                                                                                                                                                                                                                                                                                                                                                                                                                                                                                                                                                                                                                                                                                                                                            |         |         |          |          |          |         |          |          |          |         |         |          |         |          |          |          |         |          |          |          |         |          |         |          |         |          |         |          |          |          |          |          |          |          |          |          |          |          |         |          |          |          |          |          |          |          |         |          |         |          |         |          |          |          |          |         |          |          |         |         |          |         |   |         |         |          |                                                                                                                                                                                                                       |                                                                                                                                                                                                                                                                                                                                                                                                                                                                                                                                                                                                                                                                                                                                                                                                                                                                                                                                                                                                                                                                                                                                                                                                                                                                                                                                                                                                                                                                                                                                                                                                                                                                                                                                                                                                                                                                                                                                                                                                                                                                                                                                                                                                                                                                                                                                                              |         |          |          |         |          |          |         |         |         |         |                                                                                                                                                                                                                        |                                                                                                                                                                                                                                                                                                                                                                                                                                                                                                                                                                                                                                                                                                                                                                                                                                                                                                                                                                                                                                                                                                                                                                                                                                                                                                                                                                                                                                                                                                                                                                                                                                                                                                                                                                                                                                                                                                                                                                                                                                                                                                                                                                                                                                                                                                                                                                                                                                                                                                                                                                                      |   |          |          |          |   |          |          |          |   |          |         |          |   |         |          |          |   |          |         |          |   |          |          |          |   |         |          |          |   |          |         |         |   |          |          |         |   |          |          |         |   |          |         |          |   |          |          |          |   |          |          |         |   |          |          |          |   |          |          |          |   |          |          |         |   |          |          |         |   |          |          |          |   |          |          |          |   |          |          |          |   |          |          |          |   |          |          |          |   |          |          |          |   |          |          |         |   |         |          |          |   |          |         |         |   |          |         |         |   |         |          |          |   |         |          |          |   |         |          |          |   |         |          |          |   |          |          |          |   |         |          |          |   |          |          |          |   |          |          |          |
| H                                                                                                                                                                                                                     | 5.50069                                                                                                                                                                                                                                                                                                                                                                                                                                                                                                                                                                                                                                                                                                                                                                                                                                                                                                                                                                                                                                                                                                                                                                                                                                                                                                                                                                                                                                                                                                                                                                                                                                                                                                                                                                                                                                                                                                                                                                                                                                                                                                                                                                                                                                                                                                                                                                                                                                                                                                                                                              | -0.22458 | 0.54905  |         |          |   |          |         |         |   |          |          |          |   |          |         |          |   |          |         |          |   |          |         |          |   |          |          |          |   |          |         |          |   |          |          |         |   |          |          |         |   |          |         |         |   |          |         |          |   |          |         |          |   |          |          |         |   |          |         |         |   |                                                                                                                                                                                                                                                                                                                                                                                                                                                                                                                                                                                                                                                                                                                                                                                                                                                                                                                                                                                                                                                                                                                            |         |         |          |          |          |         |          |          |          |         |         |          |         |          |          |          |         |          |          |          |         |          |         |          |         |          |         |          |          |          |          |          |          |          |          |          |          |          |         |          |          |          |          |          |          |          |         |          |         |          |         |          |          |          |          |         |          |          |         |         |          |         |   |         |         |          |                                                                                                                                                                                                                       |                                                                                                                                                                                                                                                                                                                                                                                                                                                                                                                                                                                                                                                                                                                                                                                                                                                                                                                                                                                                                                                                                                                                                                                                                                                                                                                                                                                                                                                                                                                                                                                                                                                                                                                                                                                                                                                                                                                                                                                                                                                                                                                                                                                                                                                                                                                                                              |         |          |          |         |          |          |         |         |         |         |                                                                                                                                                                                                                        |                                                                                                                                                                                                                                                                                                                                                                                                                                                                                                                                                                                                                                                                                                                                                                                                                                                                                                                                                                                                                                                                                                                                                                                                                                                                                                                                                                                                                                                                                                                                                                                                                                                                                                                                                                                                                                                                                                                                                                                                                                                                                                                                                                                                                                                                                                                                                                                                                                                                                                                                                                                      |   |          |          |          |   |          |          |          |   |          |         |          |   |         |          |          |   |          |         |          |   |          |          |          |   |         |          |          |   |          |         |         |   |          |          |         |   |          |          |         |   |          |         |          |   |          |          |          |   |          |          |         |   |          |          |          |   |          |          |          |   |          |          |         |   |          |          |         |   |          |          |          |   |          |          |          |   |          |          |          |   |          |          |          |   |          |          |          |   |          |          |          |   |          |          |         |   |         |          |          |   |          |         |         |   |          |         |         |   |         |          |          |   |         |          |          |   |         |          |          |   |         |          |          |   |          |          |          |   |         |          |          |   |          |          |          |   |          |          |          |
| H                                                                                                                                                                                                                     | 4.81912                                                                                                                                                                                                                                                                                                                                                                                                                                                                                                                                                                                                                                                                                                                                                                                                                                                                                                                                                                                                                                                                                                                                                                                                                                                                                                                                                                                                                                                                                                                                                                                                                                                                                                                                                                                                                                                                                                                                                                                                                                                                                                                                                                                                                                                                                                                                                                                                                                                                                                                                                              | 0.74323  | -0.79772 |         |          |   |          |         |         |   |          |          |          |   |          |         |          |   |          |         |          |   |          |         |          |   |          |          |          |   |          |         |          |   |          |          |         |   |          |          |         |   |          |         |         |   |          |         |          |   |          |         |          |   |          |          |         |   |          |         |         |   |                                                                                                                                                                                                                                                                                                                                                                                                                                                                                                                                                                                                                                                                                                                                                                                                                                                                                                                                                                                                                                                                                                                            |         |         |          |          |          |         |          |          |          |         |         |          |         |          |          |          |         |          |          |          |         |          |         |          |         |          |         |          |          |          |          |          |          |          |          |          |          |          |         |          |          |          |          |          |          |          |         |          |         |          |         |          |          |          |          |         |          |          |         |         |          |         |   |         |         |          |                                                                                                                                                                                                                       |                                                                                                                                                                                                                                                                                                                                                                                                                                                                                                                                                                                                                                                                                                                                                                                                                                                                                                                                                                                                                                                                                                                                                                                                                                                                                                                                                                                                                                                                                                                                                                                                                                                                                                                                                                                                                                                                                                                                                                                                                                                                                                                                                                                                                                                                                                                                                              |         |          |          |         |          |          |         |         |         |         |                                                                                                                                                                                                                        |                                                                                                                                                                                                                                                                                                                                                                                                                                                                                                                                                                                                                                                                                                                                                                                                                                                                                                                                                                                                                                                                                                                                                                                                                                                                                                                                                                                                                                                                                                                                                                                                                                                                                                                                                                                                                                                                                                                                                                                                                                                                                                                                                                                                                                                                                                                                                                                                                                                                                                                                                                                      |   |          |          |          |   |          |          |          |   |          |         |          |   |         |          |          |   |          |         |          |   |          |          |          |   |         |          |          |   |          |         |         |   |          |          |         |   |          |          |         |   |          |         |          |   |          |          |          |   |          |          |         |   |          |          |          |   |          |          |          |   |          |          |         |   |          |          |         |   |          |          |          |   |          |          |          |   |          |          |          |   |          |          |          |   |          |          |          |   |          |          |          |   |          |          |         |   |         |          |          |   |          |         |         |   |          |         |         |   |         |          |          |   |         |          |          |   |         |          |          |   |         |          |          |   |          |          |          |   |         |          |          |   |          |          |          |   |          |          |          |
| C                                                                                                                                                                                                                     | -2.55893                                                                                                                                                                                                                                                                                                                                                                                                                                                                                                                                                                                                                                                                                                                                                                                                                                                                                                                                                                                                                                                                                                                                                                                                                                                                                                                                                                                                                                                                                                                                                                                                                                                                                                                                                                                                                                                                                                                                                                                                                                                                                                                                                                                                                                                                                                                                                                                                                                                                                                                                                             | -1.76345 | 0.44580  |         |          |   |          |         |         |   |          |          |          |   |          |         |          |   |          |         |          |   |          |         |          |   |          |          |          |   |          |         |          |   |          |          |         |   |          |          |         |   |          |         |         |   |          |         |          |   |          |         |          |   |          |          |         |   |          |         |         |   |                                                                                                                                                                                                                                                                                                                                                                                                                                                                                                                                                                                                                                                                                                                                                                                                                                                                                                                                                                                                                                                                                                                            |         |         |          |          |          |         |          |          |          |         |         |          |         |          |          |          |         |          |          |          |         |          |         |          |         |          |         |          |          |          |          |          |          |          |          |          |          |          |         |          |          |          |          |          |          |          |         |          |         |          |         |          |          |          |          |         |          |          |         |         |          |         |   |         |         |          |                                                                                                                                                                                                                       |                                                                                                                                                                                                                                                                                                                                                                                                                                                                                                                                                                                                                                                                                                                                                                                                                                                                                                                                                                                                                                                                                                                                                                                                                                                                                                                                                                                                                                                                                                                                                                                                                                                                                                                                                                                                                                                                                                                                                                                                                                                                                                                                                                                                                                                                                                                                                              |         |          |          |         |          |          |         |         |         |         |                                                                                                                                                                                                                        |                                                                                                                                                                                                                                                                                                                                                                                                                                                                                                                                                                                                                                                                                                                                                                                                                                                                                                                                                                                                                                                                                                                                                                                                                                                                                                                                                                                                                                                                                                                                                                                                                                                                                                                                                                                                                                                                                                                                                                                                                                                                                                                                                                                                                                                                                                                                                                                                                                                                                                                                                                                      |   |          |          |          |   |          |          |          |   |          |         |          |   |         |          |          |   |          |         |          |   |          |          |          |   |         |          |          |   |          |         |         |   |          |          |         |   |          |          |         |   |          |         |          |   |          |          |          |   |          |          |         |   |          |          |          |   |          |          |          |   |          |          |         |   |          |          |         |   |          |          |          |   |          |          |          |   |          |          |          |   |          |          |          |   |          |          |          |   |          |          |          |   |          |          |         |   |         |          |          |   |          |         |         |   |          |         |         |   |         |          |          |   |         |          |          |   |         |          |          |   |         |          |          |   |          |          |          |   |         |          |          |   |          |          |          |   |          |          |          |
| C                                                                                                                                                                                                                     | -3.07720                                                                                                                                                                                                                                                                                                                                                                                                                                                                                                                                                                                                                                                                                                                                                                                                                                                                                                                                                                                                                                                                                                                                                                                                                                                                                                                                                                                                                                                                                                                                                                                                                                                                                                                                                                                                                                                                                                                                                                                                                                                                                                                                                                                                                                                                                                                                                                                                                                                                                                                                                             | 0.54339  | 0.18424  |         |          |   |          |         |         |   |          |          |          |   |          |         |          |   |          |         |          |   |          |         |          |   |          |          |          |   |          |         |          |   |          |          |         |   |          |          |         |   |          |         |         |   |          |         |          |   |          |         |          |   |          |          |         |   |          |         |         |   |                                                                                                                                                                                                                                                                                                                                                                                                                                                                                                                                                                                                                                                                                                                                                                                                                                                                                                                                                                                                                                                                                                                            |         |         |          |          |          |         |          |          |          |         |         |          |         |          |          |          |         |          |          |          |         |          |         |          |         |          |         |          |          |          |          |          |          |          |          |          |          |          |         |          |          |          |          |          |          |          |         |          |         |          |         |          |          |          |          |         |          |          |         |         |          |         |   |         |         |          |                                                                                                                                                                                                                       |                                                                                                                                                                                                                                                                                                                                                                                                                                                                                                                                                                                                                                                                                                                                                                                                                                                                                                                                                                                                                                                                                                                                                                                                                                                                                                                                                                                                                                                                                                                                                                                                                                                                                                                                                                                                                                                                                                                                                                                                                                                                                                                                                                                                                                                                                                                                                              |         |          |          |         |          |          |         |         |         |         |                                                                                                                                                                                                                        |                                                                                                                                                                                                                                                                                                                                                                                                                                                                                                                                                                                                                                                                                                                                                                                                                                                                                                                                                                                                                                                                                                                                                                                                                                                                                                                                                                                                                                                                                                                                                                                                                                                                                                                                                                                                                                                                                                                                                                                                                                                                                                                                                                                                                                                                                                                                                                                                                                                                                                                                                                                      |   |          |          |          |   |          |          |          |   |          |         |          |   |         |          |          |   |          |         |          |   |          |          |          |   |         |          |          |   |          |         |         |   |          |          |         |   |          |          |         |   |          |         |          |   |          |          |          |   |          |          |         |   |          |          |          |   |          |          |          |   |          |          |         |   |          |          |         |   |          |          |          |   |          |          |          |   |          |          |          |   |          |          |          |   |          |          |          |   |          |          |          |   |          |          |         |   |         |          |          |   |          |         |         |   |          |         |         |   |         |          |          |   |         |          |          |   |         |          |          |   |         |          |          |   |          |          |          |   |         |          |          |   |          |          |          |   |          |          |          |
| H                                                                                                                                                                                                                     | 4.49610                                                                                                                                                                                                                                                                                                                                                                                                                                                                                                                                                                                                                                                                                                                                                                                                                                                                                                                                                                                                                                                                                                                                                                                                                                                                                                                                                                                                                                                                                                                                                                                                                                                                                                                                                                                                                                                                                                                                                                                                                                                                                                                                                                                                                                                                                                                                                                                                                                                                                                                                                              | 0.92025  | -0.84964 |         |          |   |          |         |         |   |          |          |          |   |          |         |          |   |          |         |          |   |          |         |          |   |          |          |          |   |          |         |          |   |          |          |         |   |          |          |         |   |          |         |         |   |          |         |          |   |          |         |          |   |          |          |         |   |          |         |         |   |                                                                                                                                                                                                                                                                                                                                                                                                                                                                                                                                                                                                                                                                                                                                                                                                                                                                                                                                                                                                                                                                                                                            |         |         |          |          |          |         |          |          |          |         |         |          |         |          |          |          |         |          |          |          |         |          |         |          |         |          |         |          |          |          |          |          |          |          |          |          |          |          |         |          |          |          |          |          |          |          |         |          |         |          |         |          |          |          |          |         |          |          |         |         |          |         |   |         |         |          |                                                                                                                                                                                                                       |                                                                                                                                                                                                                                                                                                                                                                                                                                                                                                                                                                                                                                                                                                                                                                                                                                                                                                                                                                                                                                                                                                                                                                                                                                                                                                                                                                                                                                                                                                                                                                                                                                                                                                                                                                                                                                                                                                                                                                                                                                                                                                                                                                                                                                                                                                                                                              |         |          |          |         |          |          |         |         |         |         |                                                                                                                                                                                                                        |                                                                                                                                                                                                                                                                                                                                                                                                                                                                                                                                                                                                                                                                                                                                                                                                                                                                                                                                                                                                                                                                                                                                                                                                                                                                                                                                                                                                                                                                                                                                                                                                                                                                                                                                                                                                                                                                                                                                                                                                                                                                                                                                                                                                                                                                                                                                                                                                                                                                                                                                                                                      |   |          |          |          |   |          |          |          |   |          |         |          |   |         |          |          |   |          |         |          |   |          |          |          |   |         |          |          |   |          |         |         |   |          |          |         |   |          |          |         |   |          |         |          |   |          |          |          |   |          |          |         |   |          |          |          |   |          |          |          |   |          |          |         |   |          |          |         |   |          |          |          |   |          |          |          |   |          |          |          |   |          |          |          |   |          |          |          |   |          |          |          |   |          |          |         |   |         |          |          |   |          |         |         |   |          |         |         |   |         |          |          |   |         |          |          |   |         |          |          |   |         |          |          |   |          |          |          |   |         |          |          |   |          |          |          |   |          |          |          |
| H                                                                                                                                                                                                                     | -4.49659                                                                                                                                                                                                                                                                                                                                                                                                                                                                                                                                                                                                                                                                                                                                                                                                                                                                                                                                                                                                                                                                                                                                                                                                                                                                                                                                                                                                                                                                                                                                                                                                                                                                                                                                                                                                                                                                                                                                                                                                                                                                                                                                                                                                                                                                                                                                                                                                                                                                                                                                                             | -0.92056 | 0.84628  |         |          |   |          |         |         |   |          |          |          |   |          |         |          |   |          |         |          |   |          |         |          |   |          |          |          |   |          |         |          |   |          |          |         |   |          |          |         |   |          |         |         |   |          |         |          |   |          |         |          |   |          |          |         |   |          |         |         |   |                                                                                                                                                                                                                                                                                                                                                                                                                                                                                                                                                                                                                                                                                                                                                                                                                                                                                                                                                                                                                                                                                                                            |         |         |          |          |          |         |          |          |          |         |         |          |         |          |          |          |         |          |          |          |         |          |         |          |         |          |         |          |          |          |          |          |          |          |          |          |          |          |         |          |          |          |          |          |          |          |         |          |         |          |         |          |          |          |          |         |          |          |         |         |          |         |   |         |         |          |                                                                                                                                                                                                                       |                                                                                                                                                                                                                                                                                                                                                                                                                                                                                                                                                                                                                                                                                                                                                                                                                                                                                                                                                                                                                                                                                                                                                                                                                                                                                                                                                                                                                                                                                                                                                                                                                                                                                                                                                                                                                                                                                                                                                                                                                                                                                                                                                                                                                                                                                                                                                              |         |          |          |         |          |          |         |         |         |         |                                                                                                                                                                                                                        |                                                                                                                                                                                                                                                                                                                                                                                                                                                                                                                                                                                                                                                                                                                                                                                                                                                                                                                                                                                                                                                                                                                                                                                                                                                                                                                                                                                                                                                                                                                                                                                                                                                                                                                                                                                                                                                                                                                                                                                                                                                                                                                                                                                                                                                                                                                                                                                                                                                                                                                                                                                      |   |          |          |          |   |          |          |          |   |          |         |          |   |         |          |          |   |          |         |          |   |          |          |          |   |         |          |          |   |          |         |         |   |          |          |         |   |          |          |         |   |          |         |          |   |          |          |          |   |          |          |         |   |          |          |          |   |          |          |          |   |          |          |         |   |          |          |         |   |          |          |          |   |          |          |          |   |          |          |          |   |          |          |          |   |          |          |          |   |          |          |          |   |          |          |         |   |         |          |          |   |          |         |         |   |          |         |         |   |         |          |          |   |         |          |          |   |         |          |          |   |         |          |          |   |          |          |          |   |         |          |          |   |          |          |          |   |          |          |          |
| H                                                                                                                                                                                                                     | -2.87601                                                                                                                                                                                                                                                                                                                                                                                                                                                                                                                                                                                                                                                                                                                                                                                                                                                                                                                                                                                                                                                                                                                                                                                                                                                                                                                                                                                                                                                                                                                                                                                                                                                                                                                                                                                                                                                                                                                                                                                                                                                                                                                                                                                                                                                                                                                                                                                                                                                                                                                                                             | -2.78840 | 0.56627  |         |          |   |          |         |         |   |          |          |          |   |          |         |          |   |          |         |          |   |          |         |          |   |          |          |          |   |          |         |          |   |          |          |         |   |          |          |         |   |          |         |         |   |          |         |          |   |          |         |          |   |          |          |         |   |          |         |         |   |                                                                                                                                                                                                                                                                                                                                                                                                                                                                                                                                                                                                                                                                                                                                                                                                                                                                                                                                                                                                                                                                                                                            |         |         |          |          |          |         |          |          |          |         |         |          |         |          |          |          |         |          |          |          |         |          |         |          |         |          |         |          |          |          |          |          |          |          |          |          |          |          |         |          |          |          |          |          |          |          |         |          |         |          |         |          |          |          |          |         |          |          |         |         |          |         |   |         |         |          |                                                                                                                                                                                                                       |                                                                                                                                                                                                                                                                                                                                                                                                                                                                                                                                                                                                                                                                                                                                                                                                                                                                                                                                                                                                                                                                                                                                                                                                                                                                                                                                                                                                                                                                                                                                                                                                                                                                                                                                                                                                                                                                                                                                                                                                                                                                                                                                                                                                                                                                                                                                                              |         |          |          |         |          |          |         |         |         |         |                                                                                                                                                                                                                        |                                                                                                                                                                                                                                                                                                                                                                                                                                                                                                                                                                                                                                                                                                                                                                                                                                                                                                                                                                                                                                                                                                                                                                                                                                                                                                                                                                                                                                                                                                                                                                                                                                                                                                                                                                                                                                                                                                                                                                                                                                                                                                                                                                                                                                                                                                                                                                                                                                                                                                                                                                                      |   |          |          |          |   |          |          |          |   |          |         |          |   |         |          |          |   |          |         |          |   |          |          |          |   |         |          |          |   |          |         |         |   |          |          |         |   |          |          |         |   |          |         |          |   |          |          |          |   |          |          |         |   |          |          |          |   |          |          |          |   |          |          |         |   |          |          |         |   |          |          |          |   |          |          |          |   |          |          |          |   |          |          |          |   |          |          |          |   |          |          |          |   |          |          |         |   |         |          |          |   |          |         |         |   |          |         |         |   |         |          |          |   |         |          |          |   |         |          |          |   |         |          |          |   |          |          |          |   |         |          |          |   |          |          |          |   |          |          |          |
| H                                                                                                                                                                                                                     | 2.87579                                                                                                                                                                                                                                                                                                                                                                                                                                                                                                                                                                                                                                                                                                                                                                                                                                                                                                                                                                                                                                                                                                                                                                                                                                                                                                                                                                                                                                                                                                                                                                                                                                                                                                                                                                                                                                                                                                                                                                                                                                                                                                                                                                                                                                                                                                                                                                                                                                                                                                                                                              | 2.78810  | -0.56767 |         |          |   |          |         |         |   |          |          |          |   |          |         |          |   |          |         |          |   |          |         |          |   |          |          |          |   |          |         |          |   |          |          |         |   |          |          |         |   |          |         |         |   |          |         |          |   |          |         |          |   |          |          |         |   |          |         |         |   |                                                                                                                                                                                                                                                                                                                                                                                                                                                                                                                                                                                                                                                                                                                                                                                                                                                                                                                                                                                                                                                                                                                            |         |         |          |          |          |         |          |          |          |         |         |          |         |          |          |          |         |          |          |          |         |          |         |          |         |          |         |          |          |          |          |          |          |          |          |          |          |          |         |          |          |          |          |          |          |          |         |          |         |          |         |          |          |          |          |         |          |          |         |         |          |         |   |         |         |          |                                                                                                                                                                                                                       |                                                                                                                                                                                                                                                                                                                                                                                                                                                                                                                                                                                                                                                                                                                                                                                                                                                                                                                                                                                                                                                                                                                                                                                                                                                                                                                                                                                                                                                                                                                                                                                                                                                                                                                                                                                                                                                                                                                                                                                                                                                                                                                                                                                                                                                                                                                                                              |         |          |          |         |          |          |         |         |         |         |                                                                                                                                                                                                                        |                                                                                                                                                                                                                                                                                                                                                                                                                                                                                                                                                                                                                                                                                                                                                                                                                                                                                                                                                                                                                                                                                                                                                                                                                                                                                                                                                                                                                                                                                                                                                                                                                                                                                                                                                                                                                                                                                                                                                                                                                                                                                                                                                                                                                                                                                                                                                                                                                                                                                                                                                                                      |   |          |          |          |   |          |          |          |   |          |         |          |   |         |          |          |   |          |         |          |   |          |          |          |   |         |          |          |   |          |         |         |   |          |          |         |   |          |          |         |   |          |         |          |   |          |          |          |   |          |          |         |   |          |          |          |   |          |          |          |   |          |          |         |   |          |          |         |   |          |          |          |   |          |          |          |   |          |          |          |   |          |          |          |   |          |          |          |   |          |          |          |   |          |          |         |   |         |          |          |   |          |         |         |   |          |         |         |   |         |          |          |   |         |          |          |   |         |          |          |   |         |          |          |   |          |          |          |   |         |          |          |   |          |          |          |   |          |          |          |
| H                                                                                                                                                                                                                     | 3.80300                                                                                                                                                                                                                                                                                                                                                                                                                                                                                                                                                                                                                                                                                                                                                                                                                                                                                                                                                                                                                                                                                                                                                                                                                                                                                                                                                                                                                                                                                                                                                                                                                                                                                                                                                                                                                                                                                                                                                                                                                                                                                                                                                                                                                                                                                                                                                                                                                                                                                                                                                              | -1.34053 | -0.14737 |         |          |   |          |         |         |   |          |          |          |   |          |         |          |   |          |         |          |   |          |         |          |   |          |          |          |   |          |         |          |   |          |          |         |   |          |          |         |   |          |         |         |   |          |         |          |   |          |         |          |   |          |          |         |   |          |         |         |   |                                                                                                                                                                                                                                                                                                                                                                                                                                                                                                                                                                                                                                                                                                                                                                                                                                                                                                                                                                                                                                                                                                                            |         |         |          |          |          |         |          |          |          |         |         |          |         |          |          |          |         |          |          |          |         |          |         |          |         |          |         |          |          |          |          |          |          |          |          |          |          |          |         |          |          |          |          |          |          |          |         |          |         |          |         |          |          |          |          |         |          |          |         |         |          |         |   |         |         |          |                                                                                                                                                                                                                       |                                                                                                                                                                                                                                                                                                                                                                                                                                                                                                                                                                                                                                                                                                                                                                                                                                                                                                                                                                                                                                                                                                                                                                                                                                                                                                                                                                                                                                                                                                                                                                                                                                                                                                                                                                                                                                                                                                                                                                                                                                                                                                                                                                                                                                                                                                                                                              |         |          |          |         |          |          |         |         |         |         |                                                                                                                                                                                                                        |                                                                                                                                                                                                                                                                                                                                                                                                                                                                                                                                                                                                                                                                                                                                                                                                                                                                                                                                                                                                                                                                                                                                                                                                                                                                                                                                                                                                                                                                                                                                                                                                                                                                                                                                                                                                                                                                                                                                                                                                                                                                                                                                                                                                                                                                                                                                                                                                                                                                                                                                                                                      |   |          |          |          |   |          |          |          |   |          |         |          |   |         |          |          |   |          |         |          |   |          |          |          |   |         |          |          |   |          |         |         |   |          |          |         |   |          |          |         |   |          |         |          |   |          |          |          |   |          |          |         |   |          |          |          |   |          |          |          |   |          |          |         |   |          |          |         |   |          |          |          |   |          |          |          |   |          |          |          |   |          |          |          |   |          |          |          |   |          |          |          |   |          |          |         |   |         |          |          |   |          |         |         |   |          |         |         |   |         |          |          |   |         |          |          |   |         |          |          |   |         |          |          |   |          |          |          |   |         |          |          |   |          |          |          |   |          |          |          |
| H                                                                                                                                                                                                                     | -3.80298                                                                                                                                                                                                                                                                                                                                                                                                                                                                                                                                                                                                                                                                                                                                                                                                                                                                                                                                                                                                                                                                                                                                                                                                                                                                                                                                                                                                                                                                                                                                                                                                                                                                                                                                                                                                                                                                                                                                                                                                                                                                                                                                                                                                                                                                                                                                                                                                                                                                                                                                                             | 1.34007  | 0.14409  |         |          |   |          |         |         |   |          |          |          |   |          |         |          |   |          |         |          |   |          |         |          |   |          |          |          |   |          |         |          |   |          |          |         |   |          |          |         |   |          |         |         |   |          |         |          |   |          |         |          |   |          |          |         |   |          |         |         |   |                                                                                                                                                                                                                                                                                                                                                                                                                                                                                                                                                                                                                                                                                                                                                                                                                                                                                                                                                                                                                                                                                                                            |         |         |          |          |          |         |          |          |          |         |         |          |         |          |          |          |         |          |          |          |         |          |         |          |         |          |         |          |          |          |          |          |          |          |          |          |          |          |         |          |          |          |          |          |          |          |         |          |         |          |         |          |          |          |          |         |          |          |         |         |          |         |   |         |         |          |                                                                                                                                                                                                                       |                                                                                                                                                                                                                                                                                                                                                                                                                                                                                                                                                                                                                                                                                                                                                                                                                                                                                                                                                                                                                                                                                                                                                                                                                                                                                                                                                                                                                                                                                                                                                                                                                                                                                                                                                                                                                                                                                                                                                                                                                                                                                                                                                                                                                                                                                                                                                              |         |          |          |         |          |          |         |         |         |         |                                                                                                                                                                                                                        |                                                                                                                                                                                                                                                                                                                                                                                                                                                                                                                                                                                                                                                                                                                                                                                                                                                                                                                                                                                                                                                                                                                                                                                                                                                                                                                                                                                                                                                                                                                                                                                                                                                                                                                                                                                                                                                                                                                                                                                                                                                                                                                                                                                                                                                                                                                                                                                                                                                                                                                                                                                      |   |          |          |          |   |          |          |          |   |          |         |          |   |         |          |          |   |          |         |          |   |          |          |          |   |         |          |          |   |          |         |         |   |          |          |         |   |          |          |         |   |          |         |          |   |          |          |          |   |          |          |         |   |          |          |          |   |          |          |          |   |          |          |         |   |          |          |         |   |          |          |          |   |          |          |          |   |          |          |          |   |          |          |          |   |          |          |          |   |          |          |          |   |          |          |         |   |         |          |          |   |          |         |         |   |          |         |         |   |         |          |          |   |         |          |          |   |         |          |          |   |         |          |          |   |          |          |          |   |         |          |          |   |          |          |          |   |          |          |          |
| C                                                                                                                                                                                                                     | -0.51008                                                                                                                                                                                                                                                                                                                                                                                                                                                                                                                                                                                                                                                                                                                                                                                                                                                                                                                                                                                                                                                                                                                                                                                                                                                                                                                                                                                                                                                                                                                                                                                                                                                                                                                                                                                                                                                                                                                                                                                                                                                                                                                                                                                                                                                                                                                                                                                                                                                                                                                                                             | -2.70164 | -0.42474 |         |          |   |          |         |         |   |          |          |          |   |          |         |          |   |          |         |          |   |          |         |          |   |          |          |          |   |          |         |          |   |          |          |         |   |          |          |         |   |          |         |         |   |          |         |          |   |          |         |          |   |          |          |         |   |          |         |         |   |                                                                                                                                                                                                                                                                                                                                                                                                                                                                                                                                                                                                                                                                                                                                                                                                                                                                                                                                                                                                                                                                                                                            |         |         |          |          |          |         |          |          |          |         |         |          |         |          |          |          |         |          |          |          |         |          |         |          |         |          |         |          |          |          |          |          |          |          |          |          |          |          |         |          |          |          |          |          |          |          |         |          |         |          |         |          |          |          |          |         |          |          |         |         |          |         |   |         |         |          |                                                                                                                                                                                                                       |                                                                                                                                                                                                                                                                                                                                                                                                                                                                                                                                                                                                                                                                                                                                                                                                                                                                                                                                                                                                                                                                                                                                                                                                                                                                                                                                                                                                                                                                                                                                                                                                                                                                                                                                                                                                                                                                                                                                                                                                                                                                                                                                                                                                                                                                                                                                                              |         |          |          |         |          |          |         |         |         |         |                                                                                                                                                                                                                        |                                                                                                                                                                                                                                                                                                                                                                                                                                                                                                                                                                                                                                                                                                                                                                                                                                                                                                                                                                                                                                                                                                                                                                                                                                                                                                                                                                                                                                                                                                                                                                                                                                                                                                                                                                                                                                                                                                                                                                                                                                                                                                                                                                                                                                                                                                                                                                                                                                                                                                                                                                                      |   |          |          |          |   |          |          |          |   |          |         |          |   |         |          |          |   |          |         |          |   |          |          |          |   |         |          |          |   |          |         |         |   |          |          |         |   |          |          |         |   |          |         |          |   |          |          |          |   |          |          |         |   |          |          |          |   |          |          |          |   |          |          |         |   |          |          |         |   |          |          |          |   |          |          |          |   |          |          |          |   |          |          |          |   |          |          |          |   |          |          |          |   |          |          |         |   |         |          |          |   |          |         |         |   |          |         |         |   |         |          |          |   |         |          |          |   |         |          |          |   |         |          |          |   |          |          |          |   |         |          |          |   |          |          |          |   |          |          |          |
| O                                                                                                                                                                                                                     | 0.02522                                                                                                                                                                                                                                                                                                                                                                                                                                                                                                                                                                                                                                                                                                                                                                                                                                                                                                                                                                                                                                                                                                                                                                                                                                                                                                                                                                                                                                                                                                                                                                                                                                                                                                                                                                                                                                                                                                                                                                                                                                                                                                                                                                                                                                                                                                                                                                                                                                                                                                                                                              | -2.72033 | -1.50628 |         |          |   |          |         |         |   |          |          |          |   |          |         |          |   |          |         |          |   |          |         |          |   |          |          |          |   |          |         |          |   |          |          |         |   |          |          |         |   |          |         |         |   |          |         |          |   |          |         |          |   |          |          |         |   |          |         |         |   |                                                                                                                                                                                                                                                                                                                                                                                                                                                                                                                                                                                                                                                                                                                                                                                                                                                                                                                                                                                                                                                                                                                            |         |         |          |          |          |         |          |          |          |         |         |          |         |          |          |          |         |          |          |          |         |          |         |          |         |          |         |          |          |          |          |          |          |          |          |          |          |          |         |          |          |          |          |          |          |          |         |          |         |          |         |          |          |          |          |         |          |          |         |         |          |         |   |         |         |          |                                                                                                                                                                                                                       |                                                                                                                                                                                                                                                                                                                                                                                                                                                                                                                                                                                                                                                                                                                                                                                                                                                                                                                                                                                                                                                                                                                                                                                                                                                                                                                                                                                                                                                                                                                                                                                                                                                                                                                                                                                                                                                                                                                                                                                                                                                                                                                                                                                                                                                                                                                                                              |         |          |          |         |          |          |         |         |         |         |                                                                                                                                                                                                                        |                                                                                                                                                                                                                                                                                                                                                                                                                                                                                                                                                                                                                                                                                                                                                                                                                                                                                                                                                                                                                                                                                                                                                                                                                                                                                                                                                                                                                                                                                                                                                                                                                                                                                                                                                                                                                                                                                                                                                                                                                                                                                                                                                                                                                                                                                                                                                                                                                                                                                                                                                                                      |   |          |          |          |   |          |          |          |   |          |         |          |   |         |          |          |   |          |         |          |   |          |          |          |   |         |          |          |   |          |         |         |   |          |          |         |   |          |          |         |   |          |         |          |   |          |          |          |   |          |          |         |   |          |          |          |   |          |          |          |   |          |          |         |   |          |          |         |   |          |          |          |   |          |          |          |   |          |          |          |   |          |          |          |   |          |          |          |   |          |          |          |   |          |          |         |   |         |          |          |   |          |         |         |   |          |         |         |   |         |          |          |   |         |          |          |   |         |          |          |   |         |          |          |   |          |          |          |   |         |          |          |   |          |          |          |   |          |          |          |
| C                                                                                                                                                                                                                     | 0.51024                                                                                                                                                                                                                                                                                                                                                                                                                                                                                                                                                                                                                                                                                                                                                                                                                                                                                                                                                                                                                                                                                                                                                                                                                                                                                                                                                                                                                                                                                                                                                                                                                                                                                                                                                                                                                                                                                                                                                                                                                                                                                                                                                                                                                                                                                                                                                                                                                                                                                                                                                              | 2.70079  | 0.42481  |         |          |   |          |         |         |   |          |          |          |   |          |         |          |   |          |         |          |   |          |         |          |   |          |          |          |   |          |         |          |   |          |          |         |   |          |          |         |   |          |         |         |   |          |         |          |   |          |         |          |   |          |          |         |   |          |         |         |   |                                                                                                                                                                                                                                                                                                                                                                                                                                                                                                                                                                                                                                                                                                                                                                                                                                                                                                                                                                                                                                                                                                                            |         |         |          |          |          |         |          |          |          |         |         |          |         |          |          |          |         |          |          |          |         |          |         |          |         |          |         |          |          |          |          |          |          |          |          |          |          |          |         |          |          |          |          |          |          |          |         |          |         |          |         |          |          |          |          |         |          |          |         |         |          |         |   |         |         |          |                                                                                                                                                                                                                       |                                                                                                                                                                                                                                                                                                                                                                                                                                                                                                                                                                                                                                                                                                                                                                                                                                                                                                                                                                                                                                                                                                                                                                                                                                                                                                                                                                                                                                                                                                                                                                                                                                                                                                                                                                                                                                                                                                                                                                                                                                                                                                                                                                                                                                                                                                                                                              |         |          |          |         |          |          |         |         |         |         |                                                                                                                                                                                                                        |                                                                                                                                                                                                                                                                                                                                                                                                                                                                                                                                                                                                                                                                                                                                                                                                                                                                                                                                                                                                                                                                                                                                                                                                                                                                                                                                                                                                                                                                                                                                                                                                                                                                                                                                                                                                                                                                                                                                                                                                                                                                                                                                                                                                                                                                                                                                                                                                                                                                                                                                                                                      |   |          |          |          |   |          |          |          |   |          |         |          |   |         |          |          |   |          |         |          |   |          |          |          |   |         |          |          |   |          |         |         |   |          |          |         |   |          |          |         |   |          |         |          |   |          |          |          |   |          |          |         |   |          |          |          |   |          |          |          |   |          |          |         |   |          |          |         |   |          |          |          |   |          |          |          |   |          |          |          |   |          |          |          |   |          |          |          |   |          |          |          |   |          |          |         |   |         |          |          |   |          |         |         |   |          |         |         |   |         |          |          |   |         |          |          |   |         |          |          |   |         |          |          |   |          |          |          |   |         |          |          |   |          |          |          |   |          |          |          |
| O                                                                                                                                                                                                                     | -0.02507                                                                                                                                                                                                                                                                                                                                                                                                                                                                                                                                                                                                                                                                                                                                                                                                                                                                                                                                                                                                                                                                                                                                                                                                                                                                                                                                                                                                                                                                                                                                                                                                                                                                                                                                                                                                                                                                                                                                                                                                                                                                                                                                                                                                                                                                                                                                                                                                                                                                                                                                                             | 2.71869  | 1.50636  |         |          |   |          |         |         |   |          |          |          |   |          |         |          |   |          |         |          |   |          |         |          |   |          |          |          |   |          |         |          |   |          |          |         |   |          |          |         |   |          |         |         |   |          |         |          |   |          |         |          |   |          |          |         |   |          |         |         |   |                                                                                                                                                                                                                                                                                                                                                                                                                                                                                                                                                                                                                                                                                                                                                                                                                                                                                                                                                                                                                                                                                                                            |         |         |          |          |          |         |          |          |          |         |         |          |         |          |          |          |         |          |          |          |         |          |         |          |         |          |         |          |          |          |          |          |          |          |          |          |          |          |         |          |          |          |          |          |          |          |         |          |         |          |         |          |          |          |          |         |          |          |         |         |          |         |   |         |         |          |                                                                                                                                                                                                                       |                                                                                                                                                                                                                                                                                                                                                                                                                                                                                                                                                                                                                                                                                                                                                                                                                                                                                                                                                                                                                                                                                                                                                                                                                                                                                                                                                                                                                                                                                                                                                                                                                                                                                                                                                                                                                                                                                                                                                                                                                                                                                                                                                                                                                                                                                                                                                              |         |          |          |         |          |          |         |         |         |         |                                                                                                                                                                                                                        |                                                                                                                                                                                                                                                                                                                                                                                                                                                                                                                                                                                                                                                                                                                                                                                                                                                                                                                                                                                                                                                                                                                                                                                                                                                                                                                                                                                                                                                                                                                                                                                                                                                                                                                                                                                                                                                                                                                                                                                                                                                                                                                                                                                                                                                                                                                                                                                                                                                                                                                                                                                      |   |          |          |          |   |          |          |          |   |          |         |          |   |         |          |          |   |          |         |          |   |          |          |          |   |         |          |          |   |          |         |         |   |          |          |         |   |          |          |         |   |          |         |          |   |          |          |          |   |          |          |         |   |          |          |          |   |          |          |          |   |          |          |         |   |          |          |         |   |          |          |          |   |          |          |          |   |          |          |          |   |          |          |          |   |          |          |          |   |          |          |          |   |          |          |         |   |         |          |          |   |          |         |         |   |          |         |         |   |         |          |          |   |         |          |          |   |         |          |          |   |         |          |          |   |          |          |          |   |         |          |          |   |          |          |          |   |          |          |          |
| O                                                                                                                                                                                                                     | 1.40610                                                                                                                                                                                                                                                                                                                                                                                                                                                                                                                                                                                                                                                                                                                                                                                                                                                                                                                                                                                                                                                                                                                                                                                                                                                                                                                                                                                                                                                                                                                                                                                                                                                                                                                                                                                                                                                                                                                                                                                                                                                                                                                                                                                                                                                                                                                                                                                                                                                                                                                                                              | -1.96517 | 0.76089  |         |          |   |          |         |         |   |          |          |          |   |          |         |          |   |          |         |          |   |          |         |          |   |          |          |          |   |          |         |          |   |          |          |         |   |          |          |         |   |          |         |         |   |          |         |          |   |          |         |          |   |          |          |         |   |          |         |         |   |                                                                                                                                                                                                                                                                                                                                                                                                                                                                                                                                                                                                                                                                                                                                                                                                                                                                                                                                                                                                                                                                                                                            |         |         |          |          |          |         |          |          |          |         |         |          |         |          |          |          |         |          |          |          |         |          |         |          |         |          |         |          |          |          |          |          |          |          |          |          |          |          |         |          |          |          |          |          |          |          |         |          |         |          |         |          |          |          |          |         |          |          |         |         |          |         |   |         |         |          |                                                                                                                                                                                                                       |                                                                                                                                                                                                                                                                                                                                                                                                                                                                                                                                                                                                                                                                                                                                                                                                                                                                                                                                                                                                                                                                                                                                                                                                                                                                                                                                                                                                                                                                                                                                                                                                                                                                                                                                                                                                                                                                                                                                                                                                                                                                                                                                                                                                                                                                                                                                                              |         |          |          |         |          |          |         |         |         |         |                                                                                                                                                                                                                        |                                                                                                                                                                                                                                                                                                                                                                                                                                                                                                                                                                                                                                                                                                                                                                                                                                                                                                                                                                                                                                                                                                                                                                                                                                                                                                                                                                                                                                                                                                                                                                                                                                                                                                                                                                                                                                                                                                                                                                                                                                                                                                                                                                                                                                                                                                                                                                                                                                                                                                                                                                                      |   |          |          |          |   |          |          |          |   |          |         |          |   |         |          |          |   |          |         |          |   |          |          |          |   |         |          |          |   |          |         |         |   |          |          |         |   |          |          |         |   |          |         |          |   |          |          |          |   |          |          |         |   |          |          |          |   |          |          |          |   |          |          |         |   |          |          |         |   |          |          |          |   |          |          |          |   |          |          |          |   |          |          |          |   |          |          |          |   |          |          |          |   |          |          |         |   |         |          |          |   |          |         |         |   |          |         |         |   |         |          |          |   |         |          |          |   |         |          |          |   |         |          |          |   |          |          |          |   |         |          |          |   |          |          |          |   |          |          |          |
| O                                                                                                                                                                                                                     | -1.40544                                                                                                                                                                                                                                                                                                                                                                                                                                                                                                                                                                                                                                                                                                                                                                                                                                                                                                                                                                                                                                                                                                                                                                                                                                                                                                                                                                                                                                                                                                                                                                                                                                                                                                                                                                                                                                                                                                                                                                                                                                                                                                                                                                                                                                                                                                                                                                                                                                                                                                                                                             | 1.96483  | -0.76201 |         |          |   |          |         |         |   |          |          |          |   |          |         |          |   |          |         |          |   |          |         |          |   |          |          |          |   |          |         |          |   |          |          |         |   |          |          |         |   |          |         |         |   |          |         |          |   |          |         |          |   |          |          |         |   |          |         |         |   |                                                                                                                                                                                                                                                                                                                                                                                                                                                                                                                                                                                                                                                                                                                                                                                                                                                                                                                                                                                                                                                                                                                            |         |         |          |          |          |         |          |          |          |         |         |          |         |          |          |          |         |          |          |          |         |          |         |          |         |          |         |          |          |          |          |          |          |          |          |          |          |          |         |          |          |          |          |          |          |          |         |          |         |          |         |          |          |          |          |         |          |          |         |         |          |         |   |         |         |          |                                                                                                                                                                                                                       |                                                                                                                                                                                                                                                                                                                                                                                                                                                                                                                                                                                                                                                                                                                                                                                                                                                                                                                                                                                                                                                                                                                                                                                                                                                                                                                                                                                                                                                                                                                                                                                                                                                                                                                                                                                                                                                                                                                                                                                                                                                                                                                                                                                                                                                                                                                                                              |         |          |          |         |          |          |         |         |         |         |                                                                                                                                                                                                                        |                                                                                                                                                                                                                                                                                                                                                                                                                                                                                                                                                                                                                                                                                                                                                                                                                                                                                                                                                                                                                                                                                                                                                                                                                                                                                                                                                                                                                                                                                                                                                                                                                                                                                                                                                                                                                                                                                                                                                                                                                                                                                                                                                                                                                                                                                                                                                                                                                                                                                                                                                                                      |   |          |          |          |   |          |          |          |   |          |         |          |   |         |          |          |   |          |         |          |   |          |          |          |   |         |          |          |   |          |         |         |   |          |          |         |   |          |          |         |   |          |         |          |   |          |          |          |   |          |          |         |   |          |          |          |   |          |          |          |   |          |          |         |   |          |          |         |   |          |          |          |   |          |          |          |   |          |          |          |   |          |          |          |   |          |          |          |   |          |          |          |   |          |          |         |   |         |          |          |   |          |         |         |   |          |         |         |   |         |          |          |   |         |          |          |   |         |          |          |   |         |          |          |   |          |          |          |   |         |          |          |   |          |          |          |   |          |          |          |
| C                                                                                                                                                                                                                     | -2.35049                                                                                                                                                                                                                                                                                                                                                                                                                                                                                                                                                                                                                                                                                                                                                                                                                                                                                                                                                                                                                                                                                                                                                                                                                                                                                                                                                                                                                                                                                                                                                                                                                                                                                                                                                                                                                                                                                                                                                                                                                                                                                                                                                                                                                                                                                                                                                                                                                                                                                                                                                             | 3.01732  | -0.85789 |         |          |   |          |         |         |   |          |          |          |   |          |         |          |   |          |         |          |   |          |         |          |   |          |          |          |   |          |         |          |   |          |          |         |   |          |          |         |   |          |         |         |   |          |         |          |   |          |         |          |   |          |          |         |   |          |         |         |   |                                                                                                                                                                                                                                                                                                                                                                                                                                                                                                                                                                                                                                                                                                                                                                                                                                                                                                                                                                                                                                                                                                                            |         |         |          |          |          |         |          |          |          |         |         |          |         |          |          |          |         |          |          |          |         |          |         |          |         |          |         |          |          |          |          |          |          |          |          |          |          |          |         |          |          |          |          |          |          |          |         |          |         |          |         |          |          |          |          |         |          |          |         |         |          |         |   |         |         |          |                                                                                                                                                                                                                       |                                                                                                                                                                                                                                                                                                                                                                                                                                                                                                                                                                                                                                                                                                                                                                                                                                                                                                                                                                                                                                                                                                                                                                                                                                                                                                                                                                                                                                                                                                                                                                                                                                                                                                                                                                                                                                                                                                                                                                                                                                                                                                                                                                                                                                                                                                                                                              |         |          |          |         |          |          |         |         |         |         |                                                                                                                                                                                                                        |                                                                                                                                                                                                                                                                                                                                                                                                                                                                                                                                                                                                                                                                                                                                                                                                                                                                                                                                                                                                                                                                                                                                                                                                                                                                                                                                                                                                                                                                                                                                                                                                                                                                                                                                                                                                                                                                                                                                                                                                                                                                                                                                                                                                                                                                                                                                                                                                                                                                                                                                                                                      |   |          |          |          |   |          |          |          |   |          |         |          |   |         |          |          |   |          |         |          |   |          |          |          |   |         |          |          |   |          |         |         |   |          |          |         |   |          |          |         |   |          |         |          |   |          |          |          |   |          |          |         |   |          |          |          |   |          |          |          |   |          |          |         |   |          |          |         |   |          |          |          |   |          |          |          |   |          |          |          |   |          |          |          |   |          |          |          |   |          |          |          |   |          |          |         |   |         |          |          |   |          |         |         |   |          |         |         |   |         |          |          |   |         |          |          |   |         |          |          |   |         |          |          |   |          |          |          |   |         |          |          |   |          |          |          |   |          |          |          |
| H                                                                                                                                                                                                                     | -2.68409                                                                                                                                                                                                                                                                                                                                                                                                                                                                                                                                                                                                                                                                                                                                                                                                                                                                                                                                                                                                                                                                                                                                                                                                                                                                                                                                                                                                                                                                                                                                                                                                                                                                                                                                                                                                                                                                                                                                                                                                                                                                                                                                                                                                                                                                                                                                                                                                                                                                                                                                                             | 3.33019  | 0.13528  |         |          |   |          |         |         |   |          |          |          |   |          |         |          |   |          |         |          |   |          |         |          |   |          |          |          |   |          |         |          |   |          |          |         |   |          |          |         |   |          |         |         |   |          |         |          |   |          |         |          |   |          |          |         |   |          |         |         |   |                                                                                                                                                                                                                                                                                                                                                                                                                                                                                                                                                                                                                                                                                                                                                                                                                                                                                                                                                                                                                                                                                                                            |         |         |          |          |          |         |          |          |          |         |         |          |         |          |          |          |         |          |          |          |         |          |         |          |         |          |         |          |          |          |          |          |          |          |          |          |          |          |         |          |          |          |          |          |          |          |         |          |         |          |         |          |          |          |          |         |          |          |         |         |          |         |   |         |         |          |                                                                                                                                                                                                                       |                                                                                                                                                                                                                                                                                                                                                                                                                                                                                                                                                                                                                                                                                                                                                                                                                                                                                                                                                                                                                                                                                                                                                                                                                                                                                                                                                                                                                                                                                                                                                                                                                                                                                                                                                                                                                                                                                                                                                                                                                                                                                                                                                                                                                                                                                                                                                              |         |          |          |         |          |          |         |         |         |         |                                                                                                                                                                                                                        |                                                                                                                                                                                                                                                                                                                                                                                                                                                                                                                                                                                                                                                                                                                                                                                                                                                                                                                                                                                                                                                                                                                                                                                                                                                                                                                                                                                                                                                                                                                                                                                                                                                                                                                                                                                                                                                                                                                                                                                                                                                                                                                                                                                                                                                                                                                                                                                                                                                                                                                                                                                      |   |          |          |          |   |          |          |          |   |          |         |          |   |         |          |          |   |          |         |          |   |          |          |          |   |         |          |          |   |          |         |         |   |          |          |         |   |          |          |         |   |          |         |          |   |          |          |          |   |          |          |         |   |          |          |          |   |          |          |          |   |          |          |         |   |          |          |         |   |          |          |          |   |          |          |          |   |          |          |          |   |          |          |          |   |          |          |          |   |          |          |          |   |          |          |         |   |         |          |          |   |          |         |         |   |          |         |         |   |         |          |          |   |         |          |          |   |         |          |          |   |         |          |          |   |          |          |          |   |         |          |          |   |          |          |          |   |          |          |          |
| H                                                                                                                                                                                                                     | -3.21267                                                                                                                                                                                                                                                                                                                                                                                                                                                                                                                                                                                                                                                                                                                                                                                                                                                                                                                                                                                                                                                                                                                                                                                                                                                                                                                                                                                                                                                                                                                                                                                                                                                                                                                                                                                                                                                                                                                                                                                                                                                                                                                                                                                                                                                                                                                                                                                                                                                                                                                                                             | 2.71570  | -1.45878 |         |          |   |          |         |         |   |          |          |          |   |          |         |          |   |          |         |          |   |          |         |          |   |          |          |          |   |          |         |          |   |          |          |         |   |          |          |         |   |          |         |         |   |          |         |          |   |          |         |          |   |          |          |         |   |          |         |         |   |                                                                                                                                                                                                                                                                                                                                                                                                                                                                                                                                                                                                                                                                                                                                                                                                                                                                                                                                                                                                                                                                                                                            |         |         |          |          |          |         |          |          |          |         |         |          |         |          |          |          |         |          |          |          |         |          |         |          |         |          |         |          |          |          |          |          |          |          |          |          |          |          |         |          |          |          |          |          |          |          |         |          |         |          |         |          |          |          |          |         |          |          |         |         |          |         |   |         |         |          |                                                                                                                                                                                                                       |                                                                                                                                                                                                                                                                                                                                                                                                                                                                                                                                                                                                                                                                                                                                                                                                                                                                                                                                                                                                                                                                                                                                                                                                                                                                                                                                                                                                                                                                                                                                                                                                                                                                                                                                                                                                                                                                                                                                                                                                                                                                                                                                                                                                                                                                                                                                                              |         |          |          |         |          |          |         |         |         |         |                                                                                                                                                                                                                        |                                                                                                                                                                                                                                                                                                                                                                                                                                                                                                                                                                                                                                                                                                                                                                                                                                                                                                                                                                                                                                                                                                                                                                                                                                                                                                                                                                                                                                                                                                                                                                                                                                                                                                                                                                                                                                                                                                                                                                                                                                                                                                                                                                                                                                                                                                                                                                                                                                                                                                                                                                                      |   |          |          |          |   |          |          |          |   |          |         |          |   |         |          |          |   |          |         |          |   |          |          |          |   |         |          |          |   |          |         |         |   |          |          |         |   |          |          |         |   |          |         |          |   |          |          |          |   |          |          |         |   |          |          |          |   |          |          |          |   |          |          |         |   |          |          |         |   |          |          |          |   |          |          |          |   |          |          |          |   |          |          |          |   |          |          |          |   |          |          |          |   |          |          |         |   |         |          |          |   |          |         |         |   |          |         |         |   |         |          |          |   |         |          |          |   |         |          |          |   |         |          |          |   |          |          |          |   |         |          |          |   |          |          |          |   |          |          |          |
| H                                                                                                                                                                                                                     | -1.82511                                                                                                                                                                                                                                                                                                                                                                                                                                                                                                                                                                                                                                                                                                                                                                                                                                                                                                                                                                                                                                                                                                                                                                                                                                                                                                                                                                                                                                                                                                                                                                                                                                                                                                                                                                                                                                                                                                                                                                                                                                                                                                                                                                                                                                                                                                                                                                                                                                                                                                                                                             | 3.83231  | -1.34898 |         |          |   |          |         |         |   |          |          |          |   |          |         |          |   |          |         |          |   |          |         |          |   |          |          |          |   |          |         |          |   |          |          |         |   |          |          |         |   |          |         |         |   |          |         |          |   |          |         |          |   |          |          |         |   |          |         |         |   |                                                                                                                                                                                                                                                                                                                                                                                                                                                                                                                                                                                                                                                                                                                                                                                                                                                                                                                                                                                                                                                                                                                            |         |         |          |          |          |         |          |          |          |         |         |          |         |          |          |          |         |          |          |          |         |          |         |          |         |          |         |          |          |          |          |          |          |          |          |          |          |          |         |          |          |          |          |          |          |          |         |          |         |          |         |          |          |          |          |         |          |          |         |         |          |         |   |         |         |          |                                                                                                                                                                                                                       |                                                                                                                                                                                                                                                                                                                                                                                                                                                                                                                                                                                                                                                                                                                                                                                                                                                                                                                                                                                                                                                                                                                                                                                                                                                                                                                                                                                                                                                                                                                                                                                                                                                                                                                                                                                                                                                                                                                                                                                                                                                                                                                                                                                                                                                                                                                                                              |         |          |          |         |          |          |         |         |         |         |                                                                                                                                                                                                                        |                                                                                                                                                                                                                                                                                                                                                                                                                                                                                                                                                                                                                                                                                                                                                                                                                                                                                                                                                                                                                                                                                                                                                                                                                                                                                                                                                                                                                                                                                                                                                                                                                                                                                                                                                                                                                                                                                                                                                                                                                                                                                                                                                                                                                                                                                                                                                                                                                                                                                                                                                                                      |   |          |          |          |   |          |          |          |   |          |         |          |   |         |          |          |   |          |         |          |   |          |          |          |   |         |          |          |   |          |         |         |   |          |          |         |   |          |          |         |   |          |         |          |   |          |          |          |   |          |          |         |   |          |          |          |   |          |          |          |   |          |          |         |   |          |          |         |   |          |          |          |   |          |          |          |   |          |          |          |   |          |          |          |   |          |          |          |   |          |          |          |   |          |          |         |   |         |          |          |   |          |         |         |   |          |         |         |   |         |          |          |   |         |          |          |   |         |          |          |   |         |          |          |   |          |          |          |   |         |          |          |   |          |          |          |   |          |          |          |
| C                                                                                                                                                                                                                     | 2.35147                                                                                                                                                                                                                                                                                                                                                                                                                                                                                                                                                                                                                                                                                                                                                                                                                                                                                                                                                                                                                                                                                                                                                                                                                                                                                                                                                                                                                                                                                                                                                                                                                                                                                                                                                                                                                                                                                                                                                                                                                                                                                                                                                                                                                                                                                                                                                                                                                                                                                                                                                              | -3.01736 | 0.85698  |         |          |   |          |         |         |   |          |          |          |   |          |         |          |   |          |         |          |   |          |         |          |   |          |          |          |   |          |         |          |   |          |          |         |   |          |          |         |   |          |         |         |   |          |         |          |   |          |         |          |   |          |          |         |   |          |         |         |   |                                                                                                                                                                                                                                                                                                                                                                                                                                                                                                                                                                                                                                                                                                                                                                                                                                                                                                                                                                                                                                                                                                                            |         |         |          |          |          |         |          |          |          |         |         |          |         |          |          |          |         |          |          |          |         |          |         |          |         |          |         |          |          |          |          |          |          |          |          |          |          |          |         |          |          |          |          |          |          |          |         |          |         |          |         |          |          |          |          |         |          |          |         |         |          |         |   |         |         |          |                                                                                                                                                                                                                       |                                                                                                                                                                                                                                                                                                                                                                                                                                                                                                                                                                                                                                                                                                                                                                                                                                                                                                                                                                                                                                                                                                                                                                                                                                                                                                                                                                                                                                                                                                                                                                                                                                                                                                                                                                                                                                                                                                                                                                                                                                                                                                                                                                                                                                                                                                                                                              |         |          |          |         |          |          |         |         |         |         |                                                                                                                                                                                                                        |                                                                                                                                                                                                                                                                                                                                                                                                                                                                                                                                                                                                                                                                                                                                                                                                                                                                                                                                                                                                                                                                                                                                                                                                                                                                                                                                                                                                                                                                                                                                                                                                                                                                                                                                                                                                                                                                                                                                                                                                                                                                                                                                                                                                                                                                                                                                                                                                                                                                                                                                                                                      |   |          |          |          |   |          |          |          |   |          |         |          |   |         |          |          |   |          |         |          |   |          |          |          |   |         |          |          |   |          |         |         |   |          |          |         |   |          |          |         |   |          |         |          |   |          |          |          |   |          |          |         |   |          |          |          |   |          |          |          |   |          |          |         |   |          |          |         |   |          |          |          |   |          |          |          |   |          |          |          |   |          |          |          |   |          |          |          |   |          |          |          |   |          |          |         |   |         |          |          |   |          |         |         |   |          |         |         |   |         |          |          |   |         |          |          |   |         |          |          |   |         |          |          |   |          |          |          |   |         |          |          |   |          |          |          |   |          |          |          |
| H                                                                                                                                                                                                                     | 3.21404                                                                                                                                                                                                                                                                                                                                                                                                                                                                                                                                                                                                                                                                                                                                                                                                                                                                                                                                                                                                                                                                                                                                                                                                                                                                                                                                                                                                                                                                                                                                                                                                                                                                                                                                                                                                                                                                                                                                                                                                                                                                                                                                                                                                                                                                                                                                                                                                                                                                                                                                                              | -2.71496 | 1.45691  |         |          |   |          |         |         |   |          |          |          |   |          |         |          |   |          |         |          |   |          |         |          |   |          |          |          |   |          |         |          |   |          |          |         |   |          |          |         |   |          |         |         |   |          |         |          |   |          |         |          |   |          |          |         |   |          |         |         |   |                                                                                                                                                                                                                                                                                                                                                                                                                                                                                                                                                                                                                                                                                                                                                                                                                                                                                                                                                                                                                                                                                                                            |         |         |          |          |          |         |          |          |          |         |         |          |         |          |          |          |         |          |          |          |         |          |         |          |         |          |         |          |          |          |          |          |          |          |          |          |          |          |         |          |          |          |          |          |          |          |         |          |         |          |         |          |          |          |          |         |          |          |         |         |          |         |   |         |         |          |                                                                                                                                                                                                                       |                                                                                                                                                                                                                                                                                                                                                                                                                                                                                                                                                                                                                                                                                                                                                                                                                                                                                                                                                                                                                                                                                                                                                                                                                                                                                                                                                                                                                                                                                                                                                                                                                                                                                                                                                                                                                                                                                                                                                                                                                                                                                                                                                                                                                                                                                                                                                              |         |          |          |         |          |          |         |         |         |         |                                                                                                                                                                                                                        |                                                                                                                                                                                                                                                                                                                                                                                                                                                                                                                                                                                                                                                                                                                                                                                                                                                                                                                                                                                                                                                                                                                                                                                                                                                                                                                                                                                                                                                                                                                                                                                                                                                                                                                                                                                                                                                                                                                                                                                                                                                                                                                                                                                                                                                                                                                                                                                                                                                                                                                                                                                      |   |          |          |          |   |          |          |          |   |          |         |          |   |         |          |          |   |          |         |          |   |          |          |          |   |         |          |          |   |          |         |         |   |          |          |         |   |          |          |         |   |          |         |          |   |          |          |          |   |          |          |         |   |          |          |          |   |          |          |          |   |          |          |         |   |          |          |         |   |          |          |          |   |          |          |          |   |          |          |          |   |          |          |          |   |          |          |          |   |          |          |          |   |          |          |         |   |         |          |          |   |          |         |         |   |          |         |         |   |         |          |          |   |         |          |          |   |         |          |          |   |         |          |          |   |          |          |          |   |         |          |          |   |          |          |          |   |          |          |          |
| H                                                                                                                                                                                                                     | 2.68437                                                                                                                                                                                                                                                                                                                                                                                                                                                                                                                                                                                                                                                                                                                                                                                                                                                                                                                                                                                                                                                                                                                                                                                                                                                                                                                                                                                                                                                                                                                                                                                                                                                                                                                                                                                                                                                                                                                                                                                                                                                                                                                                                                                                                                                                                                                                                                                                                                                                                                                                                              | -3.33109 | -0.13615 |         |          |   |          |         |         |   |          |          |          |   |          |         |          |   |          |         |          |   |          |         |          |   |          |          |          |   |          |         |          |   |          |          |         |   |          |          |         |   |          |         |         |   |          |         |          |   |          |         |          |   |          |          |         |   |          |         |         |   |                                                                                                                                                                                                                                                                                                                                                                                                                                                                                                                                                                                                                                                                                                                                                                                                                                                                                                                                                                                                                                                                                                                            |         |         |          |          |          |         |          |          |          |         |         |          |         |          |          |          |         |          |          |          |         |          |         |          |         |          |         |          |          |          |          |          |          |          |          |          |          |          |         |          |          |          |          |          |          |          |         |          |         |          |         |          |          |          |          |         |          |          |         |         |          |         |   |         |         |          |                                                                                                                                                                                                                       |                                                                                                                                                                                                                                                                                                                                                                                                                                                                                                                                                                                                                                                                                                                                                                                                                                                                                                                                                                                                                                                                                                                                                                                                                                                                                                                                                                                                                                                                                                                                                                                                                                                                                                                                                                                                                                                                                                                                                                                                                                                                                                                                                                                                                                                                                                                                                              |         |          |          |         |          |          |         |         |         |         |                                                                                                                                                                                                                        |                                                                                                                                                                                                                                                                                                                                                                                                                                                                                                                                                                                                                                                                                                                                                                                                                                                                                                                                                                                                                                                                                                                                                                                                                                                                                                                                                                                                                                                                                                                                                                                                                                                                                                                                                                                                                                                                                                                                                                                                                                                                                                                                                                                                                                                                                                                                                                                                                                                                                                                                                                                      |   |          |          |          |   |          |          |          |   |          |         |          |   |         |          |          |   |          |         |          |   |          |          |          |   |         |          |          |   |          |         |         |   |          |          |         |   |          |          |         |   |          |         |          |   |          |          |          |   |          |          |         |   |          |          |          |   |          |          |          |   |          |          |         |   |          |          |         |   |          |          |          |   |          |          |          |   |          |          |          |   |          |          |          |   |          |          |          |   |          |          |          |   |          |          |         |   |         |          |          |   |          |         |         |   |          |         |         |   |         |          |          |   |         |          |          |   |         |          |          |   |         |          |          |   |          |          |          |   |         |          |          |   |          |          |          |   |          |          |          |
| H                                                                                                                                                                                                                     | 1.82668                                                                                                                                                                                                                                                                                                                                                                                                                                                                                                                                                                                                                                                                                                                                                                                                                                                                                                                                                                                                                                                                                                                                                                                                                                                                                                                                                                                                                                                                                                                                                                                                                                                                                                                                                                                                                                                                                                                                                                                                                                                                                                                                                                                                                                                                                                                                                                                                                                                                                                                                                              | -3.83201 | 1.34926  |         |          |   |          |         |         |   |          |          |          |   |          |         |          |   |          |         |          |   |          |         |          |   |          |          |          |   |          |         |          |   |          |          |         |   |          |          |         |   |          |         |         |   |          |         |          |   |          |         |          |   |          |          |         |   |          |         |         |   |                                                                                                                                                                                                                                                                                                                                                                                                                                                                                                                                                                                                                                                                                                                                                                                                                                                                                                                                                                                                                                                                                                                            |         |         |          |          |          |         |          |          |          |         |         |          |         |          |          |          |         |          |          |          |         |          |         |          |         |          |         |          |          |          |          |          |          |          |          |          |          |          |         |          |          |          |          |          |          |          |         |          |         |          |         |          |          |          |          |         |          |          |         |         |          |         |   |         |         |          |                                                                                                                                                                                                                       |                                                                                                                                                                                                                                                                                                                                                                                                                                                                                                                                                                                                                                                                                                                                                                                                                                                                                                                                                                                                                                                                                                                                                                                                                                                                                                                                                                                                                                                                                                                                                                                                                                                                                                                                                                                                                                                                                                                                                                                                                                                                                                                                                                                                                                                                                                                                                              |         |          |          |         |          |          |         |         |         |         |                                                                                                                                                                                                                        |                                                                                                                                                                                                                                                                                                                                                                                                                                                                                                                                                                                                                                                                                                                                                                                                                                                                                                                                                                                                                                                                                                                                                                                                                                                                                                                                                                                                                                                                                                                                                                                                                                                                                                                                                                                                                                                                                                                                                                                                                                                                                                                                                                                                                                                                                                                                                                                                                                                                                                                                                                                      |   |          |          |          |   |          |          |          |   |          |         |          |   |         |          |          |   |          |         |          |   |          |          |          |   |         |          |          |   |          |         |         |   |          |          |         |   |          |          |         |   |          |         |          |   |          |          |          |   |          |          |         |   |          |          |          |   |          |          |          |   |          |          |         |   |          |          |         |   |          |          |          |   |          |          |          |   |          |          |          |   |          |          |          |   |          |          |          |   |          |          |          |   |          |          |         |   |         |          |          |   |          |         |         |   |          |         |         |   |         |          |          |   |         |          |          |   |         |          |          |   |         |          |          |   |          |          |          |   |         |          |          |   |          |          |          |   |          |          |          |
| O                                                                                                                                                                                                                     | 0.68587                                                                                                                                                                                                                                                                                                                                                                                                                                                                                                                                                                                                                                                                                                                                                                                                                                                                                                                                                                                                                                                                                                                                                                                                                                                                                                                                                                                                                                                                                                                                                                                                                                                                                                                                                                                                                                                                                                                                                                                                                                                                                                                                                                                                                                                                                                                                                                                                                                                                                                                                                              | 3.81254  | -0.32456 |         |          |   |          |         |         |   |          |          |          |   |          |         |          |   |          |         |          |   |          |         |          |   |          |          |          |   |          |         |          |   |          |          |         |   |          |          |         |   |          |         |         |   |          |         |          |   |          |         |          |   |          |          |         |   |          |         |         |   |                                                                                                                                                                                                                                                                                                                                                                                                                                                                                                                                                                                                                                                                                                                                                                                                                                                                                                                                                                                                                                                                                                                            |         |         |          |          |          |         |          |          |          |         |         |          |         |          |          |          |         |          |          |          |         |          |         |          |         |          |         |          |          |          |          |          |          |          |          |          |          |          |         |          |          |          |          |          |          |          |         |          |         |          |         |          |          |          |          |         |          |          |         |         |          |         |   |         |         |          |                                                                                                                                                                                                                       |                                                                                                                                                                                                                                                                                                                                                                                                                                                                                                                                                                                                                                                                                                                                                                                                                                                                                                                                                                                                                                                                                                                                                                                                                                                                                                                                                                                                                                                                                                                                                                                                                                                                                                                                                                                                                                                                                                                                                                                                                                                                                                                                                                                                                                                                                                                                                              |         |          |          |         |          |          |         |         |         |         |                                                                                                                                                                                                                        |                                                                                                                                                                                                                                                                                                                                                                                                                                                                                                                                                                                                                                                                                                                                                                                                                                                                                                                                                                                                                                                                                                                                                                                                                                                                                                                                                                                                                                                                                                                                                                                                                                                                                                                                                                                                                                                                                                                                                                                                                                                                                                                                                                                                                                                                                                                                                                                                                                                                                                                                                                                      |   |          |          |          |   |          |          |          |   |          |         |          |   |         |          |          |   |          |         |          |   |          |          |          |   |         |          |          |   |          |         |         |   |          |          |         |   |          |          |         |   |          |         |          |   |          |          |          |   |          |          |         |   |          |          |          |   |          |          |          |   |          |          |         |   |          |          |         |   |          |          |          |   |          |          |          |   |          |          |          |   |          |          |          |   |          |          |          |   |          |          |          |   |          |          |         |   |         |          |          |   |          |         |         |   |          |         |         |   |         |          |          |   |         |          |          |   |         |          |          |   |         |          |          |   |          |          |          |   |         |          |          |   |          |          |          |   |          |          |          |
| O                                                                                                                                                                                                                     | -0.68581                                                                                                                                                                                                                                                                                                                                                                                                                                                                                                                                                                                                                                                                                                                                                                                                                                                                                                                                                                                                                                                                                                                                                                                                                                                                                                                                                                                                                                                                                                                                                                                                                                                                                                                                                                                                                                                                                                                                                                                                                                                                                                                                                                                                                                                                                                                                                                                                                                                                                                                                                             | -3.81282 | 0.32544  |         |          |   |          |         |         |   |          |          |          |   |          |         |          |   |          |         |          |   |          |         |          |   |          |          |          |   |          |         |          |   |          |          |         |   |          |          |         |   |          |         |         |   |          |         |          |   |          |         |          |   |          |          |         |   |          |         |         |   |                                                                                                                                                                                                                                                                                                                                                                                                                                                                                                                                                                                                                                                                                                                                                                                                                                                                                                                                                                                                                                                                                                                            |         |         |          |          |          |         |          |          |          |         |         |          |         |          |          |          |         |          |          |          |         |          |         |          |         |          |         |          |          |          |          |          |          |          |          |          |          |          |         |          |          |          |          |          |          |          |         |          |         |          |         |          |          |          |          |         |          |          |         |         |          |         |   |         |         |          |                                                                                                                                                                                                                       |                                                                                                                                                                                                                                                                                                                                                                                                                                                                                                                                                                                                                                                                                                                                                                                                                                                                                                                                                                                                                                                                                                                                                                                                                                                                                                                                                                                                                                                                                                                                                                                                                                                                                                                                                                                                                                                                                                                                                                                                                                                                                                                                                                                                                                                                                                                                                              |         |          |          |         |          |          |         |         |         |         |                                                                                                                                                                                                                        |                                                                                                                                                                                                                                                                                                                                                                                                                                                                                                                                                                                                                                                                                                                                                                                                                                                                                                                                                                                                                                                                                                                                                                                                                                                                                                                                                                                                                                                                                                                                                                                                                                                                                                                                                                                                                                                                                                                                                                                                                                                                                                                                                                                                                                                                                                                                                                                                                                                                                                                                                                                      |   |          |          |          |   |          |          |          |   |          |         |          |   |         |          |          |   |          |         |          |   |          |          |          |   |         |          |          |   |          |         |         |   |          |          |         |   |          |          |         |   |          |         |          |   |          |          |          |   |          |          |         |   |          |          |          |   |          |          |          |   |          |          |         |   |          |          |         |   |          |          |          |   |          |          |          |   |          |          |          |   |          |          |          |   |          |          |          |   |          |          |          |   |          |          |         |   |         |          |          |   |          |         |         |   |          |         |         |   |         |          |          |   |         |          |          |   |         |          |          |   |         |          |          |   |          |          |          |   |         |          |          |   |          |          |          |   |          |          |          |
| C                                                                                                                                                                                                                     | -0.24967                                                                                                                                                                                                                                                                                                                                                                                                                                                                                                                                                                                                                                                                                                                                                                                                                                                                                                                                                                                                                                                                                                                                                                                                                                                                                                                                                                                                                                                                                                                                                                                                                                                                                                                                                                                                                                                                                                                                                                                                                                                                                                                                                                                                                                                                                                                                                                                                                                                                                                                                                             | -5.03529 | -0.28506 |         |          |   |          |         |         |   |          |          |          |   |          |         |          |   |          |         |          |   |          |         |          |   |          |          |          |   |          |         |          |   |          |          |         |   |          |          |         |   |          |         |         |   |          |         |          |   |          |         |          |   |          |          |         |   |          |         |         |   |                                                                                                                                                                                                                                                                                                                                                                                                                                                                                                                                                                                                                                                                                                                                                                                                                                                                                                                                                                                                                                                                                                                            |         |         |          |          |          |         |          |          |          |         |         |          |         |          |          |          |         |          |          |          |         |          |         |          |         |          |         |          |          |          |          |          |          |          |          |          |          |          |         |          |          |          |          |          |          |          |         |          |         |          |         |          |          |          |          |         |          |          |         |         |          |         |   |         |         |          |                                                                                                                                                                                                                       |                                                                                                                                                                                                                                                                                                                                                                                                                                                                                                                                                                                                                                                                                                                                                                                                                                                                                                                                                                                                                                                                                                                                                                                                                                                                                                                                                                                                                                                                                                                                                                                                                                                                                                                                                                                                                                                                                                                                                                                                                                                                                                                                                                                                                                                                                                                                                              |         |          |          |         |          |          |         |         |         |         |                                                                                                                                                                                                                        |                                                                                                                                                                                                                                                                                                                                                                                                                                                                                                                                                                                                                                                                                                                                                                                                                                                                                                                                                                                                                                                                                                                                                                                                                                                                                                                                                                                                                                                                                                                                                                                                                                                                                                                                                                                                                                                                                                                                                                                                                                                                                                                                                                                                                                                                                                                                                                                                                                                                                                                                                                                      |   |          |          |          |   |          |          |          |   |          |         |          |   |         |          |          |   |          |         |          |   |          |          |          |   |         |          |          |   |          |         |         |   |          |          |         |   |          |          |         |   |          |         |          |   |          |          |          |   |          |          |         |   |          |          |          |   |          |          |          |   |          |          |         |   |          |          |         |   |          |          |          |   |          |          |          |   |          |          |          |   |          |          |          |   |          |          |          |   |          |          |          |   |          |          |         |   |         |          |          |   |          |         |         |   |          |         |         |   |         |          |          |   |         |          |          |   |         |          |          |   |         |          |          |   |          |          |          |   |         |          |          |   |          |          |          |   |          |          |          |
| H                                                                                                                                                                                                                     | -0.79263                                                                                                                                                                                                                                                                                                                                                                                                                                                                                                                                                                                                                                                                                                                                                                                                                                                                                                                                                                                                                                                                                                                                                                                                                                                                                                                                                                                                                                                                                                                                                                                                                                                                                                                                                                                                                                                                                                                                                                                                                                                                                                                                                                                                                                                                                                                                                                                                                                                                                                                                                             | -5.21096 | -1.21446 |         |          |   |          |         |         |   |          |          |          |   |          |         |          |   |          |         |          |   |          |         |          |   |          |          |          |   |          |         |          |   |          |          |         |   |          |          |         |   |          |         |         |   |          |         |          |   |          |         |          |   |          |          |         |   |          |         |         |   |                                                                                                                                                                                                                                                                                                                                                                                                                                                                                                                                                                                                                                                                                                                                                                                                                                                                                                                                                                                                                                                                                                                            |         |         |          |          |          |         |          |          |          |         |         |          |         |          |          |          |         |          |          |          |         |          |         |          |         |          |         |          |          |          |          |          |          |          |          |          |          |          |         |          |          |          |          |          |          |          |         |          |         |          |         |          |          |          |          |         |          |          |         |         |          |         |   |         |         |          |                                                                                                                                                                                                                       |                                                                                                                                                                                                                                                                                                                                                                                                                                                                                                                                                                                                                                                                                                                                                                                                                                                                                                                                                                                                                                                                                                                                                                                                                                                                                                                                                                                                                                                                                                                                                                                                                                                                                                                                                                                                                                                                                                                                                                                                                                                                                                                                                                                                                                                                                                                                                              |         |          |          |         |          |          |         |         |         |         |                                                                                                                                                                                                                        |                                                                                                                                                                                                                                                                                                                                                                                                                                                                                                                                                                                                                                                                                                                                                                                                                                                                                                                                                                                                                                                                                                                                                                                                                                                                                                                                                                                                                                                                                                                                                                                                                                                                                                                                                                                                                                                                                                                                                                                                                                                                                                                                                                                                                                                                                                                                                                                                                                                                                                                                                                                      |   |          |          |          |   |          |          |          |   |          |         |          |   |         |          |          |   |          |         |          |   |          |          |          |   |         |          |          |   |          |         |         |   |          |          |         |   |          |          |         |   |          |         |          |   |          |          |          |   |          |          |         |   |          |          |          |   |          |          |          |   |          |          |         |   |          |          |         |   |          |          |          |   |          |          |          |   |          |          |          |   |          |          |          |   |          |          |          |   |          |          |          |   |          |          |         |   |         |          |          |   |          |         |         |   |          |         |         |   |         |          |          |   |         |          |          |   |         |          |          |   |         |          |          |   |          |          |          |   |         |          |          |   |          |          |          |   |          |          |          |
| H                                                                                                                                                                                                                     | -0.46311                                                                                                                                                                                                                                                                                                                                                                                                                                                                                                                                                                                                                                                                                                                                                                                                                                                                                                                                                                                                                                                                                                                                                                                                                                                                                                                                                                                                                                                                                                                                                                                                                                                                                                                                                                                                                                                                                                                                                                                                                                                                                                                                                                                                                                                                                                                                                                                                                                                                                                                                                             | -5.81741 | 0.43992  |         |          |   |          |         |         |   |          |          |          |   |          |         |          |   |          |         |          |   |          |         |          |   |          |          |          |   |          |         |          |   |          |          |         |   |          |          |         |   |          |         |         |   |          |         |          |   |          |         |          |   |          |          |         |   |          |         |         |   |                                                                                                                                                                                                                                                                                                                                                                                                                                                                                                                                                                                                                                                                                                                                                                                                                                                                                                                                                                                                                                                                                                                            |         |         |          |          |          |         |          |          |          |         |         |          |         |          |          |          |         |          |          |          |         |          |         |          |         |          |         |          |          |          |          |          |          |          |          |          |          |          |         |          |          |          |          |          |          |          |         |          |         |          |         |          |          |          |          |         |          |          |         |         |          |         |   |         |         |          |                                                                                                                                                                                                                       |                                                                                                                                                                                                                                                                                                                                                                                                                                                                                                                                                                                                                                                                                                                                                                                                                                                                                                                                                                                                                                                                                                                                                                                                                                                                                                                                                                                                                                                                                                                                                                                                                                                                                                                                                                                                                                                                                                                                                                                                                                                                                                                                                                                                                                                                                                                                                              |         |          |          |         |          |          |         |         |         |         |                                                                                                                                                                                                                        |                                                                                                                                                                                                                                                                                                                                                                                                                                                                                                                                                                                                                                                                                                                                                                                                                                                                                                                                                                                                                                                                                                                                                                                                                                                                                                                                                                                                                                                                                                                                                                                                                                                                                                                                                                                                                                                                                                                                                                                                                                                                                                                                                                                                                                                                                                                                                                                                                                                                                                                                                                                      |   |          |          |          |   |          |          |          |   |          |         |          |   |         |          |          |   |          |         |          |   |          |          |          |   |         |          |          |   |          |         |         |   |          |          |         |   |          |          |         |   |          |         |          |   |          |          |          |   |          |          |         |   |          |          |          |   |          |          |          |   |          |          |         |   |          |          |         |   |          |          |          |   |          |          |          |   |          |          |          |   |          |          |          |   |          |          |          |   |          |          |          |   |          |          |         |   |         |          |          |   |          |         |         |   |          |         |         |   |         |          |          |   |         |          |          |   |         |          |          |   |         |          |          |   |          |          |          |   |         |          |          |   |          |          |          |   |          |          |          |
| H                                                                                                                                                                                                                     | 0.81668                                                                                                                                                                                                                                                                                                                                                                                                                                                                                                                                                                                                                                                                                                                                                                                                                                                                                                                                                                                                                                                                                                                                                                                                                                                                                                                                                                                                                                                                                                                                                                                                                                                                                                                                                                                                                                                                                                                                                                                                                                                                                                                                                                                                                                                                                                                                                                                                                                                                                                                                                              | -4.99519 | -0.50683 |         |          |   |          |         |         |   |          |          |          |   |          |         |          |   |          |         |          |   |          |         |          |   |          |          |          |   |          |         |          |   |          |          |         |   |          |          |         |   |          |         |         |   |          |         |          |   |          |         |          |   |          |          |         |   |          |         |         |   |                                                                                                                                                                                                                                                                                                                                                                                                                                                                                                                                                                                                                                                                                                                                                                                                                                                                                                                                                                                                                                                                                                                            |         |         |          |          |          |         |          |          |          |         |         |          |         |          |          |          |         |          |          |          |         |          |         |          |         |          |         |          |          |          |          |          |          |          |          |          |          |          |         |          |          |          |          |          |          |          |         |          |         |          |         |          |          |          |          |         |          |          |         |         |          |         |   |         |         |          |                                                                                                                                                                                                                       |                                                                                                                                                                                                                                                                                                                                                                                                                                                                                                                                                                                                                                                                                                                                                                                                                                                                                                                                                                                                                                                                                                                                                                                                                                                                                                                                                                                                                                                                                                                                                                                                                                                                                                                                                                                                                                                                                                                                                                                                                                                                                                                                                                                                                                                                                                                                                              |         |          |          |         |          |          |         |         |         |         |                                                                                                                                                                                                                        |                                                                                                                                                                                                                                                                                                                                                                                                                                                                                                                                                                                                                                                                                                                                                                                                                                                                                                                                                                                                                                                                                                                                                                                                                                                                                                                                                                                                                                                                                                                                                                                                                                                                                                                                                                                                                                                                                                                                                                                                                                                                                                                                                                                                                                                                                                                                                                                                                                                                                                                                                                                      |   |          |          |          |   |          |          |          |   |          |         |          |   |         |          |          |   |          |         |          |   |          |          |          |   |         |          |          |   |          |         |         |   |          |          |         |   |          |          |         |   |          |         |          |   |          |          |          |   |          |          |         |   |          |          |          |   |          |          |          |   |          |          |         |   |          |          |         |   |          |          |          |   |          |          |          |   |          |          |          |   |          |          |          |   |          |          |          |   |          |          |          |   |          |          |         |   |         |          |          |   |          |         |         |   |          |         |         |   |         |          |          |   |         |          |          |   |         |          |          |   |         |          |          |   |          |          |          |   |         |          |          |   |          |          |          |   |          |          |          |
| C                                                                                                                                                                                                                     | 0.24958                                                                                                                                                                                                                                                                                                                                                                                                                                                                                                                                                                                                                                                                                                                                                                                                                                                                                                                                                                                                                                                                                                                                                                                                                                                                                                                                                                                                                                                                                                                                                                                                                                                                                                                                                                                                                                                                                                                                                                                                                                                                                                                                                                                                                                                                                                                                                                                                                                                                                                                                                              | 5.03450  | 0.28692  |         |          |   |          |         |         |   |          |          |          |   |          |         |          |   |          |         |          |   |          |         |          |   |          |          |          |   |          |         |          |   |          |          |         |   |          |          |         |   |          |         |         |   |          |         |          |   |          |         |          |   |          |          |         |   |          |         |         |   |                                                                                                                                                                                                                                                                                                                                                                                                                                                                                                                                                                                                                                                                                                                                                                                                                                                                                                                                                                                                                                                                                                                            |         |         |          |          |          |         |          |          |          |         |         |          |         |          |          |          |         |          |          |          |         |          |         |          |         |          |         |          |          |          |          |          |          |          |          |          |          |          |         |          |          |          |          |          |          |          |         |          |         |          |         |          |          |          |          |         |          |          |         |         |          |         |   |         |         |          |                                                                                                                                                                                                                       |                                                                                                                                                                                                                                                                                                                                                                                                                                                                                                                                                                                                                                                                                                                                                                                                                                                                                                                                                                                                                                                                                                                                                                                                                                                                                                                                                                                                                                                                                                                                                                                                                                                                                                                                                                                                                                                                                                                                                                                                                                                                                                                                                                                                                                                                                                                                                              |         |          |          |         |          |          |         |         |         |         |                                                                                                                                                                                                                        |                                                                                                                                                                                                                                                                                                                                                                                                                                                                                                                                                                                                                                                                                                                                                                                                                                                                                                                                                                                                                                                                                                                                                                                                                                                                                                                                                                                                                                                                                                                                                                                                                                                                                                                                                                                                                                                                                                                                                                                                                                                                                                                                                                                                                                                                                                                                                                                                                                                                                                                                                                                      |   |          |          |          |   |          |          |          |   |          |         |          |   |         |          |          |   |          |         |          |   |          |          |          |   |         |          |          |   |          |         |         |   |          |          |         |   |          |          |         |   |          |         |          |   |          |          |          |   |          |          |         |   |          |          |          |   |          |          |          |   |          |          |         |   |          |          |         |   |          |          |          |   |          |          |          |   |          |          |          |   |          |          |          |   |          |          |          |   |          |          |          |   |          |          |         |   |         |          |          |   |          |         |         |   |          |         |         |   |         |          |          |   |         |          |          |   |         |          |          |   |         |          |          |   |          |          |          |   |         |          |          |   |          |          |          |   |          |          |          |
| H                                                                                                                                                                                                                     | -0.81629                                                                                                                                                                                                                                                                                                                                                                                                                                                                                                                                                                                                                                                                                                                                                                                                                                                                                                                                                                                                                                                                                                                                                                                                                                                                                                                                                                                                                                                                                                                                                                                                                                                                                                                                                                                                                                                                                                                                                                                                                                                                                                                                                                                                                                                                                                                                                                                                                                                                                                                                                             | 4.99325  | 0.51076  |         |          |   |          |         |         |   |          |          |          |   |          |         |          |   |          |         |          |   |          |         |          |   |          |          |          |   |          |         |          |   |          |          |         |   |          |          |         |   |          |         |         |   |          |         |          |   |          |         |          |   |          |          |         |   |          |         |         |   |                                                                                                                                                                                                                                                                                                                                                                                                                                                                                                                                                                                                                                                                                                                                                                                                                                                                                                                                                                                                                                                                                                                            |         |         |          |          |          |         |          |          |          |         |         |          |         |          |          |          |         |          |          |          |         |          |         |          |         |          |         |          |          |          |          |          |          |          |          |          |          |          |         |          |          |          |          |          |          |          |         |          |         |          |         |          |          |          |          |         |          |          |         |         |          |         |   |         |         |          |                                                                                                                                                                                                                       |                                                                                                                                                                                                                                                                                                                                                                                                                                                                                                                                                                                                                                                                                                                                                                                                                                                                                                                                                                                                                                                                                                                                                                                                                                                                                                                                                                                                                                                                                                                                                                                                                                                                                                                                                                                                                                                                                                                                                                                                                                                                                                                                                                                                                                                                                                                                                              |         |          |          |         |          |          |         |         |         |         |                                                                                                                                                                                                                        |                                                                                                                                                                                                                                                                                                                                                                                                                                                                                                                                                                                                                                                                                                                                                                                                                                                                                                                                                                                                                                                                                                                                                                                                                                                                                                                                                                                                                                                                                                                                                                                                                                                                                                                                                                                                                                                                                                                                                                                                                                                                                                                                                                                                                                                                                                                                                                                                                                                                                                                                                                                      |   |          |          |          |   |          |          |          |   |          |         |          |   |         |          |          |   |          |         |          |   |          |          |          |   |         |          |          |   |          |         |         |   |          |          |         |   |          |          |         |   |          |         |          |   |          |          |          |   |          |          |         |   |          |          |          |   |          |          |          |   |          |          |         |   |          |          |         |   |          |          |          |   |          |          |          |   |          |          |          |   |          |          |          |   |          |          |          |   |          |          |          |   |          |          |         |   |         |          |          |   |          |         |         |   |          |         |         |   |         |          |          |   |         |          |          |   |         |          |          |   |         |          |          |   |          |          |          |   |         |          |          |   |          |          |          |   |          |          |          |
| H                                                                                                                                                                                                                     | 0.46084                                                                                                                                                                                                                                                                                                                                                                                                                                                                                                                                                                                                                                                                                                                                                                                                                                                                                                                                                                                                                                                                                                                                                                                                                                                                                                                                                                                                                                                                                                                                                                                                                                                                                                                                                                                                                                                                                                                                                                                                                                                                                                                                                                                                                                                                                                                                                                                                                                                                                                                                                              | 5.81693  | -0.43837 |         |          |   |          |         |         |   |          |          |          |   |          |         |          |   |          |         |          |   |          |         |          |   |          |          |          |   |          |         |          |   |          |          |         |   |          |          |         |   |          |         |         |   |          |         |          |   |          |         |          |   |          |          |         |   |          |         |         |   |                                                                                                                                                                                                                                                                                                                                                                                                                                                                                                                                                                                                                                                                                                                                                                                                                                                                                                                                                                                                                                                                                                                            |         |         |          |          |          |         |          |          |          |         |         |          |         |          |          |          |         |          |          |          |         |          |         |          |         |          |         |          |          |          |          |          |          |          |          |          |          |          |         |          |          |          |          |          |          |          |         |          |         |          |         |          |          |          |          |         |          |          |         |         |          |         |   |         |         |          |                                                                                                                                                                                                                       |                                                                                                                                                                                                                                                                                                                                                                                                                                                                                                                                                                                                                                                                                                                                                                                                                                                                                                                                                                                                                                                                                                                                                                                                                                                                                                                                                                                                                                                                                                                                                                                                                                                                                                                                                                                                                                                                                                                                                                                                                                                                                                                                                                                                                                                                                                                                                              |         |          |          |         |          |          |         |         |         |         |                                                                                                                                                                                                                        |                                                                                                                                                                                                                                                                                                                                                                                                                                                                                                                                                                                                                                                                                                                                                                                                                                                                                                                                                                                                                                                                                                                                                                                                                                                                                                                                                                                                                                                                                                                                                                                                                                                                                                                                                                                                                                                                                                                                                                                                                                                                                                                                                                                                                                                                                                                                                                                                                                                                                                                                                                                      |   |          |          |          |   |          |          |          |   |          |         |          |   |         |          |          |   |          |         |          |   |          |          |          |   |         |          |          |   |          |         |         |   |          |          |         |   |          |          |         |   |          |         |          |   |          |          |          |   |          |          |         |   |          |          |          |   |          |          |          |   |          |          |         |   |          |          |         |   |          |          |          |   |          |          |          |   |          |          |          |   |          |          |          |   |          |          |          |   |          |          |          |   |          |          |         |   |         |          |          |   |          |         |         |   |          |         |         |   |         |          |          |   |         |          |          |   |         |          |          |   |         |          |          |   |          |          |          |   |         |          |          |   |          |          |          |   |          |          |          |
| H                                                                                                                                                                                                                     | 0.79418                                                                                                                                                                                                                                                                                                                                                                                                                                                                                                                                                                                                                                                                                                                                                                                                                                                                                                                                                                                                                                                                                                                                                                                                                                                                                                                                                                                                                                                                                                                                                                                                                                                                                                                                                                                                                                                                                                                                                                                                                                                                                                                                                                                                                                                                                                                                                                                                                                                                                                                                                              | 5.21063  | 1.21528  |         |          |   |          |         |         |   |          |          |          |   |          |         |          |   |          |         |          |   |          |         |          |   |          |          |          |   |          |         |          |   |          |          |         |   |          |          |         |   |          |         |         |   |          |         |          |   |          |         |          |   |          |          |         |   |          |         |         |   |                                                                                                                                                                                                                                                                                                                                                                                                                                                                                                                                                                                                                                                                                                                                                                                                                                                                                                                                                                                                                                                                                                                            |         |         |          |          |          |         |          |          |          |         |         |          |         |          |          |          |         |          |          |          |         |          |         |          |         |          |         |          |          |          |          |          |          |          |          |          |          |          |         |          |          |          |          |          |          |          |         |          |         |          |         |          |          |          |          |         |          |          |         |         |          |         |   |         |         |          |                                                                                                                                                                                                                       |                                                                                                                                                                                                                                                                                                                                                                                                                                                                                                                                                                                                                                                                                                                                                                                                                                                                                                                                                                                                                                                                                                                                                                                                                                                                                                                                                                                                                                                                                                                                                                                                                                                                                                                                                                                                                                                                                                                                                                                                                                                                                                                                                                                                                                                                                                                                                              |         |          |          |         |          |          |         |         |         |         |                                                                                                                                                                                                                        |                                                                                                                                                                                                                                                                                                                                                                                                                                                                                                                                                                                                                                                                                                                                                                                                                                                                                                                                                                                                                                                                                                                                                                                                                                                                                                                                                                                                                                                                                                                                                                                                                                                                                                                                                                                                                                                                                                                                                                                                                                                                                                                                                                                                                                                                                                                                                                                                                                                                                                                                                                                      |   |          |          |          |   |          |          |          |   |          |         |          |   |         |          |          |   |          |         |          |   |          |          |          |   |         |          |          |   |          |         |         |   |          |          |         |   |          |          |         |   |          |         |          |   |          |          |          |   |          |          |         |   |          |          |          |   |          |          |          |   |          |          |         |   |          |          |         |   |          |          |          |   |          |          |          |   |          |          |          |   |          |          |          |   |          |          |          |   |          |          |          |   |          |          |         |   |         |          |          |   |          |         |         |   |          |         |         |   |         |          |          |   |         |          |          |   |         |          |          |   |         |          |          |   |          |          |          |   |         |          |          |   |          |          |          |   |          |          |          |
|  <p><b>3a</b><br/>                     -695.6309526<br/>                     -695.5184002<br/>                     -696.1692552</p> | <table border="1"> <tbody> <tr><td>C</td><td>-0.79854</td><td>5.18301</td><td>-1.37392</td></tr> <tr><td>C</td><td>-0.40741</td><td>3.11605</td><td>0.47322</td></tr> <tr><td>C</td><td>-1.03568</td><td>3.86148</td><td>-1.72685</td></tr> <tr><td>C</td><td>-0.37129</td><td>5.48245</td><td>-0.08465</td></tr> <tr><td>C</td><td>-0.18092</td><td>4.45180</td><td>0.82522</td></tr> <tr><td>C</td><td>-0.85014</td><td>2.81144</td><td>-0.82459</td></tr> <tr><td>H</td><td>-1.38216</td><td>3.63381</td><td>-2.72704</td></tr> <tr><td>H</td><td>0.16158</td><td>4.67241</td><td>1.82818</td></tr> <tr><td>C</td><td>-0.19372</td><td>2.07956</td><td>1.51800</td></tr> <tr><td>C</td><td>0.20056</td><td>0.18740</td><td>3.55059</td></tr> <tr><td>C</td><td>0.77846</td><td>1.07095</td><td>1.37860</td></tr> <tr><td>C</td><td>-0.93567</td><td>2.11830</td><td>2.69605</td></tr> <tr><td>C</td><td>-0.75126</td><td>1.18339</td><td>3.71175</td></tr> <tr><td>C</td><td>0.96773</td><td>0.12832</td><td>2.38919</td></tr> <tr><td>H</td><td>-1.67996</td><td>2.89678</td><td>2.80443</td></tr> <tr><td>H</td><td>-1.34818</td><td>1.23371</td><td>4.61232</td></tr> <tr><td>H</td><td>1.71339</td><td>-0.64520</td><td>2.28316</td></tr> <tr><td>H</td><td>0.35779</td><td>-0.55039</td><td>4.32669</td></tr> <tr><td>C</td><td>-1.18254</td><td>1.39958</td><td>-1.26776</td></tr> <tr><td>H</td><td>-0.96730</td><td>0.71997</td><td>-0.44540</td></tr> <tr><td>H</td><td>-0.18327</td><td>6.50714</td><td>0.20863</td></tr> <tr><td>H</td><td>-0.94971</td><td>5.97301</td><td>-2.09843</td></tr> <tr><td>C</td><td>-2.67701</td><td>1.26765</td><td>-1.59420</td></tr> <tr><td>H</td><td>-2.94961</td><td>1.92348</td><td>-2.42431</td></tr> <tr><td>H</td><td>-3.29102</td><td>1.53824</td><td>-0.73305</td></tr> <tr><td>H</td><td>-2.91307</td><td>0.23982</td><td>-1.88103</td></tr> <tr><td>C</td><td>-0.33036</td><td>0.97051</td><td>-2.46831</td></tr> <tr><td>H</td><td>-0.54775</td><td>1.59439</td><td>-3.33857</td></tr> <tr><td>H</td><td>-0.54781</td><td>-0.06669</td><td>-2.73577</td></tr> <tr><td>H</td><td>0.73076</td><td>1.06092</td><td>-2.23683</td></tr> <tr><td>O</td><td>1.50344</td><td>1.09264</td><td>0.22678</td></tr> <tr><td>C</td><td>2.44638</td><td>0.05924</td><td>0.00448</td></tr> <tr><td>H</td><td>2.87540</td><td>0.24929</td><td>-0.97711</td></tr> <tr><td>H</td><td>1.96342</td><td>-0.92329</td><td>0.01209</td></tr> <tr><td>H</td><td>3.23677</td><td>0.07503</td><td>0.76151</td></tr> </tbody> </table> | C        | -0.79854 | 5.18301 | -1.37392 | C | -0.40741 | 3.11605 | 0.47322 | C | -1.03568 | 3.86148  | -1.72685 | C | -0.37129 | 5.48245 | -0.08465 | C | -0.18092 | 4.45180 | 0.82522  | C | -0.85014 | 2.81144 | -0.82459 | H | -1.38216 | 3.63381  | -2.72704 | H | 0.16158  | 4.67241 | 1.82818  | C | -0.19372 | 2.07956  | 1.51800 | C | 0.20056  | 0.18740  | 3.55059 | C | 0.77846  | 1.07095 | 1.37860 | C | -0.93567 | 2.11830 | 2.69605  | C | -0.75126 | 1.18339 | 3.71175  | C | 0.96773  | 0.12832  | 2.38919 | H | -1.67996 | 2.89678 | 2.80443 | H | -1.34818                                                                                                                                                                                                                                                                                                                                                                                                                                                                                                                                                                                                                                                                                                                                                                                                                                                                                                                                                                                                                                                                                                                   | 1.23371 | 4.61232 | H        | 1.71339  | -0.64520 | 2.28316 | H        | 0.35779  | -0.55039 | 4.32669 | C       | -1.18254 | 1.39958 | -1.26776 | H        | -0.96730 | 0.71997 | -0.44540 | H        | -0.18327 | 6.50714 | 0.20863  | H       | -0.94971 | 5.97301 | -2.09843 | C       | -2.67701 | 1.26765  | -1.59420 | H        | -2.94961 | 1.92348  | -2.42431 | H        | -3.29102 | 1.53824  | -0.73305 | H       | -2.91307 | 0.23982  | -1.88103 | C        | -0.33036 | 0.97051  | -2.46831 | H       | -0.54775 | 1.59439 | -3.33857 | H       | -0.54781 | -0.06669 | -2.73577 | H        | 0.73076 | 1.06092  | -2.23683 | O       | 1.50344 | 1.09264  | 0.22678 | C | 2.44638 | 0.05924 | 0.00448  | H                                                                                                                                                                                                                     | 2.87540                                                                                                                                                                                                                                                                                                                                                                                                                                                                                                                                                                                                                                                                                                                                                                                                                                                                                                                                                                                                                                                                                                                                                                                                                                                                                                                                                                                                                                                                                                                                                                                                                                                                                                                                                                                                                                                                                                                                                                                                                                                                                                                                                                                                                                                                                                                                                      | 0.24929 | -0.97711 | H        | 1.96342 | -0.92329 | 0.01209  | H       | 3.23677 | 0.07503 | 0.76151 |  <p><b>3a</b><br/>                     -695.6022222<br/>                     -695.4893423<br/>                     -696.1419818</p> | <table border="1"> <tbody> <tr><td>C</td><td>0.05264</td><td>2.34917</td><td>-2.69108</td></tr> <tr><td>C</td><td>-0.06249</td><td>0.51954</td><td>-0.48514</td></tr> <tr><td>C</td><td>-0.00050</td><td>0.97825</td><td>-2.88278</td></tr> <tr><td>C</td><td>0.01920</td><td>2.82235</td><td>-1.39488</td></tr> <tr><td>C</td><td>-0.03755</td><td>1.92440</td><td>-0.34137</td></tr> <tr><td>C</td><td>-0.07091</td><td>0.04246</td><td>-1.84499</td></tr> <tr><td>H</td><td>0.00690</td><td>0.62195</td><td>-3.90035</td></tr> <tr><td>H</td><td>-0.06094</td><td>2.34079</td><td>0.64246</td></tr> <tr><td>C</td><td>-0.08379</td><td>-0.32346</td><td>0.77618</td></tr> <tr><td>C</td><td>-0.15013</td><td>-2.03841</td><td>3.09878</td></tr> <tr><td>C</td><td>-0.04513</td><td>0.18949</td><td>2.12032</td></tr> <tr><td>C</td><td>-0.13310</td><td>-1.72838</td><td>0.72674</td></tr> <tr><td>C</td><td>-0.16948</td><td>-2.57426</td><td>1.82680</td></tr> <tr><td>C</td><td>-0.08462</td><td>-0.66076</td><td>3.22895</td></tr> <tr><td>H</td><td>-0.13801</td><td>-2.21986</td><td>-0.21742</td></tr> <tr><td>H</td><td>-0.20826</td><td>-3.64373</td><td>1.66936</td></tr> <tr><td>H</td><td>-0.06065</td><td>-2.23788</td><td>4.22001</td></tr> <tr><td>H</td><td>-0.17834</td><td>-2.66579</td><td>3.97990</td></tr> <tr><td>C</td><td>-0.10812</td><td>-1.41627</td><td>-2.30672</td></tr> <tr><td>H</td><td>-0.82103</td><td>-1.95273</td><td>-1.68611</td></tr> <tr><td>H</td><td>0.03800</td><td>3.88398</td><td>-1.18398</td></tr> <tr><td>H</td><td>0.10715</td><td>3.01816</td><td>-3.54027</td></tr> <tr><td>O</td><td>0.03882</td><td>1.53376</td><td>2.33572</td></tr> <tr><td>C</td><td>0.10817</td><td>2.04900</td><td>3.65352</td></tr> <tr><td>H</td><td>0.98720</td><td>1.66943</td><td>4.18298</td></tr> <tr><td>H</td><td>-0.79187</td><td>1.80402</td><td>4.22541</td></tr> <tr><td>H</td><td>0.18678</td><td>3.12869</td><td>3.54139</td></tr> <tr><td>C</td><td>1.28921</td><td>-2.04978</td><td>-2.18024</td></tr> <tr><td>H</td><td>1.95644</td><td>-1.57723</td><td>-2.90486</td></tr> <tr><td>H</td><td>1.25124</td><td>-3.12061</td><td>-2.39699</td></tr> <tr><td>H</td><td>1.71908</td><td>-1.90928</td><td>-1.18895</td></tr> <tr><td>C</td><td>-0.62184</td><td>-1.65019</td><td>-3.73610</td></tr> <tr><td>H</td><td>0.09903</td><td>-1.33441</td><td>-4.49279</td></tr> <tr><td>H</td><td>-1.56410</td><td>-1.13021</td><td>-3.91586</td></tr> <tr><td>H</td><td>-0.78526</td><td>-2.72120</td><td>-3.87284</td></tr> </tbody> </table> | C | 0.05264  | 2.34917  | -2.69108 | C | -0.06249 | 0.51954  | -0.48514 | C | -0.00050 | 0.97825 | -2.88278 | C | 0.01920 | 2.82235  | -1.39488 | C | -0.03755 | 1.92440 | -0.34137 | C | -0.07091 | 0.04246  | -1.84499 | H | 0.00690 | 0.62195  | -3.90035 | H | -0.06094 | 2.34079 | 0.64246 | C | -0.08379 | -0.32346 | 0.77618 | C | -0.15013 | -2.03841 | 3.09878 | C | -0.04513 | 0.18949 | 2.12032  | C | -0.13310 | -1.72838 | 0.72674  | C | -0.16948 | -2.57426 | 1.82680 | C | -0.08462 | -0.66076 | 3.22895  | H | -0.13801 | -2.21986 | -0.21742 | H | -0.20826 | -3.64373 | 1.66936 | H | -0.06065 | -2.23788 | 4.22001 | H | -0.17834 | -2.66579 | 3.97990  | C | -0.10812 | -1.41627 | -2.30672 | H | -0.82103 | -1.95273 | -1.68611 | H | 0.03800  | 3.88398  | -1.18398 | H | 0.10715  | 3.01816  | -3.54027 | O | 0.03882  | 1.53376  | 2.33572  | C | 0.10817  | 2.04900  | 3.65352 | H | 0.98720 | 1.66943  | 4.18298  | H | -0.79187 | 1.80402 | 4.22541 | H | 0.18678  | 3.12869 | 3.54139 | C | 1.28921 | -2.04978 | -2.18024 | H | 1.95644 | -1.57723 | -2.90486 | H | 1.25124 | -3.12061 | -2.39699 | H | 1.71908 | -1.90928 | -1.18895 | C | -0.62184 | -1.65019 | -3.73610 | H | 0.09903 | -1.33441 | -4.49279 | H | -1.56410 | -1.13021 | -3.91586 | H | -0.78526 | -2.72120 | -3.87284 |
| C                                                                                                                                                                                                                     | -0.79854                                                                                                                                                                                                                                                                                                                                                                                                                                                                                                                                                                                                                                                                                                                                                                                                                                                                                                                                                                                                                                                                                                                                                                                                                                                                                                                                                                                                                                                                                                                                                                                                                                                                                                                                                                                                                                                                                                                                                                                                                                                                                                                                                                                                                                                                                                                                                                                                                                                                                                                                                             | 5.18301  | -1.37392 |         |          |   |          |         |         |   |          |          |          |   |          |         |          |   |          |         |          |   |          |         |          |   |          |          |          |   |          |         |          |   |          |          |         |   |          |          |         |   |          |         |         |   |          |         |          |   |          |         |          |   |          |          |         |   |          |         |         |   |                                                                                                                                                                                                                                                                                                                                                                                                                                                                                                                                                                                                                                                                                                                                                                                                                                                                                                                                                                                                                                                                                                                            |         |         |          |          |          |         |          |          |          |         |         |          |         |          |          |          |         |          |          |          |         |          |         |          |         |          |         |          |          |          |          |          |          |          |          |          |          |          |         |          |          |          |          |          |          |          |         |          |         |          |         |          |          |          |          |         |          |          |         |         |          |         |   |         |         |          |                                                                                                                                                                                                                       |                                                                                                                                                                                                                                                                                                                                                                                                                                                                                                                                                                                                                                                                                                                                                                                                                                                                                                                                                                                                                                                                                                                                                                                                                                                                                                                                                                                                                                                                                                                                                                                                                                                                                                                                                                                                                                                                                                                                                                                                                                                                                                                                                                                                                                                                                                                                                              |         |          |          |         |          |          |         |         |         |         |                                                                                                                                                                                                                        |                                                                                                                                                                                                                                                                                                                                                                                                                                                                                                                                                                                                                                                                                                                                                                                                                                                                                                                                                                                                                                                                                                                                                                                                                                                                                                                                                                                                                                                                                                                                                                                                                                                                                                                                                                                                                                                                                                                                                                                                                                                                                                                                                                                                                                                                                                                                                                                                                                                                                                                                                                                      |   |          |          |          |   |          |          |          |   |          |         |          |   |         |          |          |   |          |         |          |   |          |          |          |   |         |          |          |   |          |         |         |   |          |          |         |   |          |          |         |   |          |         |          |   |          |          |          |   |          |          |         |   |          |          |          |   |          |          |          |   |          |          |         |   |          |          |         |   |          |          |          |   |          |          |          |   |          |          |          |   |          |          |          |   |          |          |          |   |          |          |          |   |          |          |         |   |         |          |          |   |          |         |         |   |          |         |         |   |         |          |          |   |         |          |          |   |         |          |          |   |         |          |          |   |          |          |          |   |         |          |          |   |          |          |          |   |          |          |          |
| C                                                                                                                                                                                                                     | -0.40741                                                                                                                                                                                                                                                                                                                                                                                                                                                                                                                                                                                                                                                                                                                                                                                                                                                                                                                                                                                                                                                                                                                                                                                                                                                                                                                                                                                                                                                                                                                                                                                                                                                                                                                                                                                                                                                                                                                                                                                                                                                                                                                                                                                                                                                                                                                                                                                                                                                                                                                                                             | 3.11605  | 0.47322  |         |          |   |          |         |         |   |          |          |          |   |          |         |          |   |          |         |          |   |          |         |          |   |          |          |          |   |          |         |          |   |          |          |         |   |          |          |         |   |          |         |         |   |          |         |          |   |          |         |          |   |          |          |         |   |          |         |         |   |                                                                                                                                                                                                                                                                                                                                                                                                                                                                                                                                                                                                                                                                                                                                                                                                                                                                                                                                                                                                                                                                                                                            |         |         |          |          |          |         |          |          |          |         |         |          |         |          |          |          |         |          |          |          |         |          |         |          |         |          |         |          |          |          |          |          |          |          |          |          |          |          |         |          |          |          |          |          |          |          |         |          |         |          |         |          |          |          |          |         |          |          |         |         |          |         |   |         |         |          |                                                                                                                                                                                                                       |                                                                                                                                                                                                                                                                                                                                                                                                                                                                                                                                                                                                                                                                                                                                                                                                                                                                                                                                                                                                                                                                                                                                                                                                                                                                                                                                                                                                                                                                                                                                                                                                                                                                                                                                                                                                                                                                                                                                                                                                                                                                                                                                                                                                                                                                                                                                                              |         |          |          |         |          |          |         |         |         |         |                                                                                                                                                                                                                        |                                                                                                                                                                                                                                                                                                                                                                                                                                                                                                                                                                                                                                                                                                                                                                                                                                                                                                                                                                                                                                                                                                                                                                                                                                                                                                                                                                                                                                                                                                                                                                                                                                                                                                                                                                                                                                                                                                                                                                                                                                                                                                                                                                                                                                                                                                                                                                                                                                                                                                                                                                                      |   |          |          |          |   |          |          |          |   |          |         |          |   |         |          |          |   |          |         |          |   |          |          |          |   |         |          |          |   |          |         |         |   |          |          |         |   |          |          |         |   |          |         |          |   |          |          |          |   |          |          |         |   |          |          |          |   |          |          |          |   |          |          |         |   |          |          |         |   |          |          |          |   |          |          |          |   |          |          |          |   |          |          |          |   |          |          |          |   |          |          |          |   |          |          |         |   |         |          |          |   |          |         |         |   |          |         |         |   |         |          |          |   |         |          |          |   |         |          |          |   |         |          |          |   |          |          |          |   |         |          |          |   |          |          |          |   |          |          |          |
| C                                                                                                                                                                                                                     | -1.03568                                                                                                                                                                                                                                                                                                                                                                                                                                                                                                                                                                                                                                                                                                                                                                                                                                                                                                                                                                                                                                                                                                                                                                                                                                                                                                                                                                                                                                                                                                                                                                                                                                                                                                                                                                                                                                                                                                                                                                                                                                                                                                                                                                                                                                                                                                                                                                                                                                                                                                                                                             | 3.86148  | -1.72685 |         |          |   |          |         |         |   |          |          |          |   |          |         |          |   |          |         |          |   |          |         |          |   |          |          |          |   |          |         |          |   |          |          |         |   |          |          |         |   |          |         |         |   |          |         |          |   |          |         |          |   |          |          |         |   |          |         |         |   |                                                                                                                                                                                                                                                                                                                                                                                                                                                                                                                                                                                                                                                                                                                                                                                                                                                                                                                                                                                                                                                                                                                            |         |         |          |          |          |         |          |          |          |         |         |          |         |          |          |          |         |          |          |          |         |          |         |          |         |          |         |          |          |          |          |          |          |          |          |          |          |          |         |          |          |          |          |          |          |          |         |          |         |          |         |          |          |          |          |         |          |          |         |         |          |         |   |         |         |          |                                                                                                                                                                                                                       |                                                                                                                                                                                                                                                                                                                                                                                                                                                                                                                                                                                                                                                                                                                                                                                                                                                                                                                                                                                                                                                                                                                                                                                                                                                                                                                                                                                                                                                                                                                                                                                                                                                                                                                                                                                                                                                                                                                                                                                                                                                                                                                                                                                                                                                                                                                                                              |         |          |          |         |          |          |         |         |         |         |                                                                                                                                                                                                                        |                                                                                                                                                                                                                                                                                                                                                                                                                                                                                                                                                                                                                                                                                                                                                                                                                                                                                                                                                                                                                                                                                                                                                                                                                                                                                                                                                                                                                                                                                                                                                                                                                                                                                                                                                                                                                                                                                                                                                                                                                                                                                                                                                                                                                                                                                                                                                                                                                                                                                                                                                                                      |   |          |          |          |   |          |          |          |   |          |         |          |   |         |          |          |   |          |         |          |   |          |          |          |   |         |          |          |   |          |         |         |   |          |          |         |   |          |          |         |   |          |         |          |   |          |          |          |   |          |          |         |   |          |          |          |   |          |          |          |   |          |          |         |   |          |          |         |   |          |          |          |   |          |          |          |   |          |          |          |   |          |          |          |   |          |          |          |   |          |          |          |   |          |          |         |   |         |          |          |   |          |         |         |   |          |         |         |   |         |          |          |   |         |          |          |   |         |          |          |   |         |          |          |   |          |          |          |   |         |          |          |   |          |          |          |   |          |          |          |
| C                                                                                                                                                                                                                     | -0.37129                                                                                                                                                                                                                                                                                                                                                                                                                                                                                                                                                                                                                                                                                                                                                                                                                                                                                                                                                                                                                                                                                                                                                                                                                                                                                                                                                                                                                                                                                                                                                                                                                                                                                                                                                                                                                                                                                                                                                                                                                                                                                                                                                                                                                                                                                                                                                                                                                                                                                                                                                             | 5.48245  | -0.08465 |         |          |   |          |         |         |   |          |          |          |   |          |         |          |   |          |         |          |   |          |         |          |   |          |          |          |   |          |         |          |   |          |          |         |   |          |          |         |   |          |         |         |   |          |         |          |   |          |         |          |   |          |          |         |   |          |         |         |   |                                                                                                                                                                                                                                                                                                                                                                                                                                                                                                                                                                                                                                                                                                                                                                                                                                                                                                                                                                                                                                                                                                                            |         |         |          |          |          |         |          |          |          |         |         |          |         |          |          |          |         |          |          |          |         |          |         |          |         |          |         |          |          |          |          |          |          |          |          |          |          |          |         |          |          |          |          |          |          |          |         |          |         |          |         |          |          |          |          |         |          |          |         |         |          |         |   |         |         |          |                                                                                                                                                                                                                       |                                                                                                                                                                                                                                                                                                                                                                                                                                                                                                                                                                                                                                                                                                                                                                                                                                                                                                                                                                                                                                                                                                                                                                                                                                                                                                                                                                                                                                                                                                                                                                                                                                                                                                                                                                                                                                                                                                                                                                                                                                                                                                                                                                                                                                                                                                                                                              |         |          |          |         |          |          |         |         |         |         |                                                                                                                                                                                                                        |                                                                                                                                                                                                                                                                                                                                                                                                                                                                                                                                                                                                                                                                                                                                                                                                                                                                                                                                                                                                                                                                                                                                                                                                                                                                                                                                                                                                                                                                                                                                                                                                                                                                                                                                                                                                                                                                                                                                                                                                                                                                                                                                                                                                                                                                                                                                                                                                                                                                                                                                                                                      |   |          |          |          |   |          |          |          |   |          |         |          |   |         |          |          |   |          |         |          |   |          |          |          |   |         |          |          |   |          |         |         |   |          |          |         |   |          |          |         |   |          |         |          |   |          |          |          |   |          |          |         |   |          |          |          |   |          |          |          |   |          |          |         |   |          |          |         |   |          |          |          |   |          |          |          |   |          |          |          |   |          |          |          |   |          |          |          |   |          |          |          |   |          |          |         |   |         |          |          |   |          |         |         |   |          |         |         |   |         |          |          |   |         |          |          |   |         |          |          |   |         |          |          |   |          |          |          |   |         |          |          |   |          |          |          |   |          |          |          |
| C                                                                                                                                                                                                                     | -0.18092                                                                                                                                                                                                                                                                                                                                                                                                                                                                                                                                                                                                                                                                                                                                                                                                                                                                                                                                                                                                                                                                                                                                                                                                                                                                                                                                                                                                                                                                                                                                                                                                                                                                                                                                                                                                                                                                                                                                                                                                                                                                                                                                                                                                                                                                                                                                                                                                                                                                                                                                                             | 4.45180  | 0.82522  |         |          |   |          |         |         |   |          |          |          |   |          |         |          |   |          |         |          |   |          |         |          |   |          |          |          |   |          |         |          |   |          |          |         |   |          |          |         |   |          |         |         |   |          |         |          |   |          |         |          |   |          |          |         |   |          |         |         |   |                                                                                                                                                                                                                                                                                                                                                                                                                                                                                                                                                                                                                                                                                                                                                                                                                                                                                                                                                                                                                                                                                                                            |         |         |          |          |          |         |          |          |          |         |         |          |         |          |          |          |         |          |          |          |         |          |         |          |         |          |         |          |          |          |          |          |          |          |          |          |          |          |         |          |          |          |          |          |          |          |         |          |         |          |         |          |          |          |          |         |          |          |         |         |          |         |   |         |         |          |                                                                                                                                                                                                                       |                                                                                                                                                                                                                                                                                                                                                                                                                                                                                                                                                                                                                                                                                                                                                                                                                                                                                                                                                                                                                                                                                                                                                                                                                                                                                                                                                                                                                                                                                                                                                                                                                                                                                                                                                                                                                                                                                                                                                                                                                                                                                                                                                                                                                                                                                                                                                              |         |          |          |         |          |          |         |         |         |         |                                                                                                                                                                                                                        |                                                                                                                                                                                                                                                                                                                                                                                                                                                                                                                                                                                                                                                                                                                                                                                                                                                                                                                                                                                                                                                                                                                                                                                                                                                                                                                                                                                                                                                                                                                                                                                                                                                                                                                                                                                                                                                                                                                                                                                                                                                                                                                                                                                                                                                                                                                                                                                                                                                                                                                                                                                      |   |          |          |          |   |          |          |          |   |          |         |          |   |         |          |          |   |          |         |          |   |          |          |          |   |         |          |          |   |          |         |         |   |          |          |         |   |          |          |         |   |          |         |          |   |          |          |          |   |          |          |         |   |          |          |          |   |          |          |          |   |          |          |         |   |          |          |         |   |          |          |          |   |          |          |          |   |          |          |          |   |          |          |          |   |          |          |          |   |          |          |          |   |          |          |         |   |         |          |          |   |          |         |         |   |          |         |         |   |         |          |          |   |         |          |          |   |         |          |          |   |         |          |          |   |          |          |          |   |         |          |          |   |          |          |          |   |          |          |          |
| C                                                                                                                                                                                                                     | -0.85014                                                                                                                                                                                                                                                                                                                                                                                                                                                                                                                                                                                                                                                                                                                                                                                                                                                                                                                                                                                                                                                                                                                                                                                                                                                                                                                                                                                                                                                                                                                                                                                                                                                                                                                                                                                                                                                                                                                                                                                                                                                                                                                                                                                                                                                                                                                                                                                                                                                                                                                                                             | 2.81144  | -0.82459 |         |          |   |          |         |         |   |          |          |          |   |          |         |          |   |          |         |          |   |          |         |          |   |          |          |          |   |          |         |          |   |          |          |         |   |          |          |         |   |          |         |         |   |          |         |          |   |          |         |          |   |          |          |         |   |          |         |         |   |                                                                                                                                                                                                                                                                                                                                                                                                                                                                                                                                                                                                                                                                                                                                                                                                                                                                                                                                                                                                                                                                                                                            |         |         |          |          |          |         |          |          |          |         |         |          |         |          |          |          |         |          |          |          |         |          |         |          |         |          |         |          |          |          |          |          |          |          |          |          |          |          |         |          |          |          |          |          |          |          |         |          |         |          |         |          |          |          |          |         |          |          |         |         |          |         |   |         |         |          |                                                                                                                                                                                                                       |                                                                                                                                                                                                                                                                                                                                                                                                                                                                                                                                                                                                                                                                                                                                                                                                                                                                                                                                                                                                                                                                                                                                                                                                                                                                                                                                                                                                                                                                                                                                                                                                                                                                                                                                                                                                                                                                                                                                                                                                                                                                                                                                                                                                                                                                                                                                                              |         |          |          |         |          |          |         |         |         |         |                                                                                                                                                                                                                        |                                                                                                                                                                                                                                                                                                                                                                                                                                                                                                                                                                                                                                                                                                                                                                                                                                                                                                                                                                                                                                                                                                                                                                                                                                                                                                                                                                                                                                                                                                                                                                                                                                                                                                                                                                                                                                                                                                                                                                                                                                                                                                                                                                                                                                                                                                                                                                                                                                                                                                                                                                                      |   |          |          |          |   |          |          |          |   |          |         |          |   |         |          |          |   |          |         |          |   |          |          |          |   |         |          |          |   |          |         |         |   |          |          |         |   |          |          |         |   |          |         |          |   |          |          |          |   |          |          |         |   |          |          |          |   |          |          |          |   |          |          |         |   |          |          |         |   |          |          |          |   |          |          |          |   |          |          |          |   |          |          |          |   |          |          |          |   |          |          |          |   |          |          |         |   |         |          |          |   |          |         |         |   |          |         |         |   |         |          |          |   |         |          |          |   |         |          |          |   |         |          |          |   |          |          |          |   |         |          |          |   |          |          |          |   |          |          |          |
| H                                                                                                                                                                                                                     | -1.38216                                                                                                                                                                                                                                                                                                                                                                                                                                                                                                                                                                                                                                                                                                                                                                                                                                                                                                                                                                                                                                                                                                                                                                                                                                                                                                                                                                                                                                                                                                                                                                                                                                                                                                                                                                                                                                                                                                                                                                                                                                                                                                                                                                                                                                                                                                                                                                                                                                                                                                                                                             | 3.63381  | -2.72704 |         |          |   |          |         |         |   |          |          |          |   |          |         |          |   |          |         |          |   |          |         |          |   |          |          |          |   |          |         |          |   |          |          |         |   |          |          |         |   |          |         |         |   |          |         |          |   |          |         |          |   |          |          |         |   |          |         |         |   |                                                                                                                                                                                                                                                                                                                                                                                                                                                                                                                                                                                                                                                                                                                                                                                                                                                                                                                                                                                                                                                                                                                            |         |         |          |          |          |         |          |          |          |         |         |          |         |          |          |          |         |          |          |          |         |          |         |          |         |          |         |          |          |          |          |          |          |          |          |          |          |          |         |          |          |          |          |          |          |          |         |          |         |          |         |          |          |          |          |         |          |          |         |         |          |         |   |         |         |          |                                                                                                                                                                                                                       |                                                                                                                                                                                                                                                                                                                                                                                                                                                                                                                                                                                                                                                                                                                                                                                                                                                                                                                                                                                                                                                                                                                                                                                                                                                                                                                                                                                                                                                                                                                                                                                                                                                                                                                                                                                                                                                                                                                                                                                                                                                                                                                                                                                                                                                                                                                                                              |         |          |          |         |          |          |         |         |         |         |                                                                                                                                                                                                                        |                                                                                                                                                                                                                                                                                                                                                                                                                                                                                                                                                                                                                                                                                                                                                                                                                                                                                                                                                                                                                                                                                                                                                                                                                                                                                                                                                                                                                                                                                                                                                                                                                                                                                                                                                                                                                                                                                                                                                                                                                                                                                                                                                                                                                                                                                                                                                                                                                                                                                                                                                                                      |   |          |          |          |   |          |          |          |   |          |         |          |   |         |          |          |   |          |         |          |   |          |          |          |   |         |          |          |   |          |         |         |   |          |          |         |   |          |          |         |   |          |         |          |   |          |          |          |   |          |          |         |   |          |          |          |   |          |          |          |   |          |          |         |   |          |          |         |   |          |          |          |   |          |          |          |   |          |          |          |   |          |          |          |   |          |          |          |   |          |          |          |   |          |          |         |   |         |          |          |   |          |         |         |   |          |         |         |   |         |          |          |   |         |          |          |   |         |          |          |   |         |          |          |   |          |          |          |   |         |          |          |   |          |          |          |   |          |          |          |
| H                                                                                                                                                                                                                     | 0.16158                                                                                                                                                                                                                                                                                                                                                                                                                                                                                                                                                                                                                                                                                                                                                                                                                                                                                                                                                                                                                                                                                                                                                                                                                                                                                                                                                                                                                                                                                                                                                                                                                                                                                                                                                                                                                                                                                                                                                                                                                                                                                                                                                                                                                                                                                                                                                                                                                                                                                                                                                              | 4.67241  | 1.82818  |         |          |   |          |         |         |   |          |          |          |   |          |         |          |   |          |         |          |   |          |         |          |   |          |          |          |   |          |         |          |   |          |          |         |   |          |          |         |   |          |         |         |   |          |         |          |   |          |         |          |   |          |          |         |   |          |         |         |   |                                                                                                                                                                                                                                                                                                                                                                                                                                                                                                                                                                                                                                                                                                                                                                                                                                                                                                                                                                                                                                                                                                                            |         |         |          |          |          |         |          |          |          |         |         |          |         |          |          |          |         |          |          |          |         |          |         |          |         |          |         |          |          |          |          |          |          |          |          |          |          |          |         |          |          |          |          |          |          |          |         |          |         |          |         |          |          |          |          |         |          |          |         |         |          |         |   |         |         |          |                                                                                                                                                                                                                       |                                                                                                                                                                                                                                                                                                                                                                                                                                                                                                                                                                                                                                                                                                                                                                                                                                                                                                                                                                                                                                                                                                                                                                                                                                                                                                                                                                                                                                                                                                                                                                                                                                                                                                                                                                                                                                                                                                                                                                                                                                                                                                                                                                                                                                                                                                                                                              |         |          |          |         |          |          |         |         |         |         |                                                                                                                                                                                                                        |                                                                                                                                                                                                                                                                                                                                                                                                                                                                                                                                                                                                                                                                                                                                                                                                                                                                                                                                                                                                                                                                                                                                                                                                                                                                                                                                                                                                                                                                                                                                                                                                                                                                                                                                                                                                                                                                                                                                                                                                                                                                                                                                                                                                                                                                                                                                                                                                                                                                                                                                                                                      |   |          |          |          |   |          |          |          |   |          |         |          |   |         |          |          |   |          |         |          |   |          |          |          |   |         |          |          |   |          |         |         |   |          |          |         |   |          |          |         |   |          |         |          |   |          |          |          |   |          |          |         |   |          |          |          |   |          |          |          |   |          |          |         |   |          |          |         |   |          |          |          |   |          |          |          |   |          |          |          |   |          |          |          |   |          |          |          |   |          |          |          |   |          |          |         |   |         |          |          |   |          |         |         |   |          |         |         |   |         |          |          |   |         |          |          |   |         |          |          |   |         |          |          |   |          |          |          |   |         |          |          |   |          |          |          |   |          |          |          |
| C                                                                                                                                                                                                                     | -0.19372                                                                                                                                                                                                                                                                                                                                                                                                                                                                                                                                                                                                                                                                                                                                                                                                                                                                                                                                                                                                                                                                                                                                                                                                                                                                                                                                                                                                                                                                                                                                                                                                                                                                                                                                                                                                                                                                                                                                                                                                                                                                                                                                                                                                                                                                                                                                                                                                                                                                                                                                                             | 2.07956  | 1.51800  |         |          |   |          |         |         |   |          |          |          |   |          |         |          |   |          |         |          |   |          |         |          |   |          |          |          |   |          |         |          |   |          |          |         |   |          |          |         |   |          |         |         |   |          |         |          |   |          |         |          |   |          |          |         |   |          |         |         |   |                                                                                                                                                                                                                                                                                                                                                                                                                                                                                                                                                                                                                                                                                                                                                                                                                                                                                                                                                                                                                                                                                                                            |         |         |          |          |          |         |          |          |          |         |         |          |         |          |          |          |         |          |          |          |         |          |         |          |         |          |         |          |          |          |          |          |          |          |          |          |          |          |         |          |          |          |          |          |          |          |         |          |         |          |         |          |          |          |          |         |          |          |         |         |          |         |   |         |         |          |                                                                                                                                                                                                                       |                                                                                                                                                                                                                                                                                                                                                                                                                                                                                                                                                                                                                                                                                                                                                                                                                                                                                                                                                                                                                                                                                                                                                                                                                                                                                                                                                                                                                                                                                                                                                                                                                                                                                                                                                                                                                                                                                                                                                                                                                                                                                                                                                                                                                                                                                                                                                              |         |          |          |         |          |          |         |         |         |         |                                                                                                                                                                                                                        |                                                                                                                                                                                                                                                                                                                                                                                                                                                                                                                                                                                                                                                                                                                                                                                                                                                                                                                                                                                                                                                                                                                                                                                                                                                                                                                                                                                                                                                                                                                                                                                                                                                                                                                                                                                                                                                                                                                                                                                                                                                                                                                                                                                                                                                                                                                                                                                                                                                                                                                                                                                      |   |          |          |          |   |          |          |          |   |          |         |          |   |         |          |          |   |          |         |          |   |          |          |          |   |         |          |          |   |          |         |         |   |          |          |         |   |          |          |         |   |          |         |          |   |          |          |          |   |          |          |         |   |          |          |          |   |          |          |          |   |          |          |         |   |          |          |         |   |          |          |          |   |          |          |          |   |          |          |          |   |          |          |          |   |          |          |          |   |          |          |          |   |          |          |         |   |         |          |          |   |          |         |         |   |          |         |         |   |         |          |          |   |         |          |          |   |         |          |          |   |         |          |          |   |          |          |          |   |         |          |          |   |          |          |          |   |          |          |          |
| C                                                                                                                                                                                                                     | 0.20056                                                                                                                                                                                                                                                                                                                                                                                                                                                                                                                                                                                                                                                                                                                                                                                                                                                                                                                                                                                                                                                                                                                                                                                                                                                                                                                                                                                                                                                                                                                                                                                                                                                                                                                                                                                                                                                                                                                                                                                                                                                                                                                                                                                                                                                                                                                                                                                                                                                                                                                                                              | 0.18740  | 3.55059  |         |          |   |          |         |         |   |          |          |          |   |          |         |          |   |          |         |          |   |          |         |          |   |          |          |          |   |          |         |          |   |          |          |         |   |          |          |         |   |          |         |         |   |          |         |          |   |          |         |          |   |          |          |         |   |          |         |         |   |                                                                                                                                                                                                                                                                                                                                                                                                                                                                                                                                                                                                                                                                                                                                                                                                                                                                                                                                                                                                                                                                                                                            |         |         |          |          |          |         |          |          |          |         |         |          |         |          |          |          |         |          |          |          |         |          |         |          |         |          |         |          |          |          |          |          |          |          |          |          |          |          |         |          |          |          |          |          |          |          |         |          |         |          |         |          |          |          |          |         |          |          |         |         |          |         |   |         |         |          |                                                                                                                                                                                                                       |                                                                                                                                                                                                                                                                                                                                                                                                                                                                                                                                                                                                                                                                                                                                                                                                                                                                                                                                                                                                                                                                                                                                                                                                                                                                                                                                                                                                                                                                                                                                                                                                                                                                                                                                                                                                                                                                                                                                                                                                                                                                                                                                                                                                                                                                                                                                                              |         |          |          |         |          |          |         |         |         |         |                                                                                                                                                                                                                        |                                                                                                                                                                                                                                                                                                                                                                                                                                                                                                                                                                                                                                                                                                                                                                                                                                                                                                                                                                                                                                                                                                                                                                                                                                                                                                                                                                                                                                                                                                                                                                                                                                                                                                                                                                                                                                                                                                                                                                                                                                                                                                                                                                                                                                                                                                                                                                                                                                                                                                                                                                                      |   |          |          |          |   |          |          |          |   |          |         |          |   |         |          |          |   |          |         |          |   |          |          |          |   |         |          |          |   |          |         |         |   |          |          |         |   |          |          |         |   |          |         |          |   |          |          |          |   |          |          |         |   |          |          |          |   |          |          |          |   |          |          |         |   |          |          |         |   |          |          |          |   |          |          |          |   |          |          |          |   |          |          |          |   |          |          |          |   |          |          |          |   |          |          |         |   |         |          |          |   |          |         |         |   |          |         |         |   |         |          |          |   |         |          |          |   |         |          |          |   |         |          |          |   |          |          |          |   |         |          |          |   |          |          |          |   |          |          |          |
| C                                                                                                                                                                                                                     | 0.77846                                                                                                                                                                                                                                                                                                                                                                                                                                                                                                                                                                                                                                                                                                                                                                                                                                                                                                                                                                                                                                                                                                                                                                                                                                                                                                                                                                                                                                                                                                                                                                                                                                                                                                                                                                                                                                                                                                                                                                                                                                                                                                                                                                                                                                                                                                                                                                                                                                                                                                                                                              | 1.07095  | 1.37860  |         |          |   |          |         |         |   |          |          |          |   |          |         |          |   |          |         |          |   |          |         |          |   |          |          |          |   |          |         |          |   |          |          |         |   |          |          |         |   |          |         |         |   |          |         |          |   |          |         |          |   |          |          |         |   |          |         |         |   |                                                                                                                                                                                                                                                                                                                                                                                                                                                                                                                                                                                                                                                                                                                                                                                                                                                                                                                                                                                                                                                                                                                            |         |         |          |          |          |         |          |          |          |         |         |          |         |          |          |          |         |          |          |          |         |          |         |          |         |          |         |          |          |          |          |          |          |          |          |          |          |          |         |          |          |          |          |          |          |          |         |          |         |          |         |          |          |          |          |         |          |          |         |         |          |         |   |         |         |          |                                                                                                                                                                                                                       |                                                                                                                                                                                                                                                                                                                                                                                                                                                                                                                                                                                                                                                                                                                                                                                                                                                                                                                                                                                                                                                                                                                                                                                                                                                                                                                                                                                                                                                                                                                                                                                                                                                                                                                                                                                                                                                                                                                                                                                                                                                                                                                                                                                                                                                                                                                                                              |         |          |          |         |          |          |         |         |         |         |                                                                                                                                                                                                                        |                                                                                                                                                                                                                                                                                                                                                                                                                                                                                                                                                                                                                                                                                                                                                                                                                                                                                                                                                                                                                                                                                                                                                                                                                                                                                                                                                                                                                                                                                                                                                                                                                                                                                                                                                                                                                                                                                                                                                                                                                                                                                                                                                                                                                                                                                                                                                                                                                                                                                                                                                                                      |   |          |          |          |   |          |          |          |   |          |         |          |   |         |          |          |   |          |         |          |   |          |          |          |   |         |          |          |   |          |         |         |   |          |          |         |   |          |          |         |   |          |         |          |   |          |          |          |   |          |          |         |   |          |          |          |   |          |          |          |   |          |          |         |   |          |          |         |   |          |          |          |   |          |          |          |   |          |          |          |   |          |          |          |   |          |          |          |   |          |          |          |   |          |          |         |   |         |          |          |   |          |         |         |   |          |         |         |   |         |          |          |   |         |          |          |   |         |          |          |   |         |          |          |   |          |          |          |   |         |          |          |   |          |          |          |   |          |          |          |
| C                                                                                                                                                                                                                     | -0.93567                                                                                                                                                                                                                                                                                                                                                                                                                                                                                                                                                                                                                                                                                                                                                                                                                                                                                                                                                                                                                                                                                                                                                                                                                                                                                                                                                                                                                                                                                                                                                                                                                                                                                                                                                                                                                                                                                                                                                                                                                                                                                                                                                                                                                                                                                                                                                                                                                                                                                                                                                             | 2.11830  | 2.69605  |         |          |   |          |         |         |   |          |          |          |   |          |         |          |   |          |         |          |   |          |         |          |   |          |          |          |   |          |         |          |   |          |          |         |   |          |          |         |   |          |         |         |   |          |         |          |   |          |         |          |   |          |          |         |   |          |         |         |   |                                                                                                                                                                                                                                                                                                                                                                                                                                                                                                                                                                                                                                                                                                                                                                                                                                                                                                                                                                                                                                                                                                                            |         |         |          |          |          |         |          |          |          |         |         |          |         |          |          |          |         |          |          |          |         |          |         |          |         |          |         |          |          |          |          |          |          |          |          |          |          |          |         |          |          |          |          |          |          |          |         |          |         |          |         |          |          |          |          |         |          |          |         |         |          |         |   |         |         |          |                                                                                                                                                                                                                       |                                                                                                                                                                                                                                                                                                                                                                                                                                                                                                                                                                                                                                                                                                                                                                                                                                                                                                                                                                                                                                                                                                                                                                                                                                                                                                                                                                                                                                                                                                                                                                                                                                                                                                                                                                                                                                                                                                                                                                                                                                                                                                                                                                                                                                                                                                                                                              |         |          |          |         |          |          |         |         |         |         |                                                                                                                                                                                                                        |                                                                                                                                                                                                                                                                                                                                                                                                                                                                                                                                                                                                                                                                                                                                                                                                                                                                                                                                                                                                                                                                                                                                                                                                                                                                                                                                                                                                                                                                                                                                                                                                                                                                                                                                                                                                                                                                                                                                                                                                                                                                                                                                                                                                                                                                                                                                                                                                                                                                                                                                                                                      |   |          |          |          |   |          |          |          |   |          |         |          |   |         |          |          |   |          |         |          |   |          |          |          |   |         |          |          |   |          |         |         |   |          |          |         |   |          |          |         |   |          |         |          |   |          |          |          |   |          |          |         |   |          |          |          |   |          |          |          |   |          |          |         |   |          |          |         |   |          |          |          |   |          |          |          |   |          |          |          |   |          |          |          |   |          |          |          |   |          |          |          |   |          |          |         |   |         |          |          |   |          |         |         |   |          |         |         |   |         |          |          |   |         |          |          |   |         |          |          |   |         |          |          |   |          |          |          |   |         |          |          |   |          |          |          |   |          |          |          |
| C                                                                                                                                                                                                                     | -0.75126                                                                                                                                                                                                                                                                                                                                                                                                                                                                                                                                                                                                                                                                                                                                                                                                                                                                                                                                                                                                                                                                                                                                                                                                                                                                                                                                                                                                                                                                                                                                                                                                                                                                                                                                                                                                                                                                                                                                                                                                                                                                                                                                                                                                                                                                                                                                                                                                                                                                                                                                                             | 1.18339  | 3.71175  |         |          |   |          |         |         |   |          |          |          |   |          |         |          |   |          |         |          |   |          |         |          |   |          |          |          |   |          |         |          |   |          |          |         |   |          |          |         |   |          |         |         |   |          |         |          |   |          |         |          |   |          |          |         |   |          |         |         |   |                                                                                                                                                                                                                                                                                                                                                                                                                                                                                                                                                                                                                                                                                                                                                                                                                                                                                                                                                                                                                                                                                                                            |         |         |          |          |          |         |          |          |          |         |         |          |         |          |          |          |         |          |          |          |         |          |         |          |         |          |         |          |          |          |          |          |          |          |          |          |          |          |         |          |          |          |          |          |          |          |         |          |         |          |         |          |          |          |          |         |          |          |         |         |          |         |   |         |         |          |                                                                                                                                                                                                                       |                                                                                                                                                                                                                                                                                                                                                                                                                                                                                                                                                                                                                                                                                                                                                                                                                                                                                                                                                                                                                                                                                                                                                                                                                                                                                                                                                                                                                                                                                                                                                                                                                                                                                                                                                                                                                                                                                                                                                                                                                                                                                                                                                                                                                                                                                                                                                              |         |          |          |         |          |          |         |         |         |         |                                                                                                                                                                                                                        |                                                                                                                                                                                                                                                                                                                                                                                                                                                                                                                                                                                                                                                                                                                                                                                                                                                                                                                                                                                                                                                                                                                                                                                                                                                                                                                                                                                                                                                                                                                                                                                                                                                                                                                                                                                                                                                                                                                                                                                                                                                                                                                                                                                                                                                                                                                                                                                                                                                                                                                                                                                      |   |          |          |          |   |          |          |          |   |          |         |          |   |         |          |          |   |          |         |          |   |          |          |          |   |         |          |          |   |          |         |         |   |          |          |         |   |          |          |         |   |          |         |          |   |          |          |          |   |          |          |         |   |          |          |          |   |          |          |          |   |          |          |         |   |          |          |         |   |          |          |          |   |          |          |          |   |          |          |          |   |          |          |          |   |          |          |          |   |          |          |          |   |          |          |         |   |         |          |          |   |          |         |         |   |          |         |         |   |         |          |          |   |         |          |          |   |         |          |          |   |         |          |          |   |          |          |          |   |         |          |          |   |          |          |          |   |          |          |          |
| C                                                                                                                                                                                                                     | 0.96773                                                                                                                                                                                                                                                                                                                                                                                                                                                                                                                                                                                                                                                                                                                                                                                                                                                                                                                                                                                                                                                                                                                                                                                                                                                                                                                                                                                                                                                                                                                                                                                                                                                                                                                                                                                                                                                                                                                                                                                                                                                                                                                                                                                                                                                                                                                                                                                                                                                                                                                                                              | 0.12832  | 2.38919  |         |          |   |          |         |         |   |          |          |          |   |          |         |          |   |          |         |          |   |          |         |          |   |          |          |          |   |          |         |          |   |          |          |         |   |          |          |         |   |          |         |         |   |          |         |          |   |          |         |          |   |          |          |         |   |          |         |         |   |                                                                                                                                                                                                                                                                                                                                                                                                                                                                                                                                                                                                                                                                                                                                                                                                                                                                                                                                                                                                                                                                                                                            |         |         |          |          |          |         |          |          |          |         |         |          |         |          |          |          |         |          |          |          |         |          |         |          |         |          |         |          |          |          |          |          |          |          |          |          |          |          |         |          |          |          |          |          |          |          |         |          |         |          |         |          |          |          |          |         |          |          |         |         |          |         |   |         |         |          |                                                                                                                                                                                                                       |                                                                                                                                                                                                                                                                                                                                                                                                                                                                                                                                                                                                                                                                                                                                                                                                                                                                                                                                                                                                                                                                                                                                                                                                                                                                                                                                                                                                                                                                                                                                                                                                                                                                                                                                                                                                                                                                                                                                                                                                                                                                                                                                                                                                                                                                                                                                                              |         |          |          |         |          |          |         |         |         |         |                                                                                                                                                                                                                        |                                                                                                                                                                                                                                                                                                                                                                                                                                                                                                                                                                                                                                                                                                                                                                                                                                                                                                                                                                                                                                                                                                                                                                                                                                                                                                                                                                                                                                                                                                                                                                                                                                                                                                                                                                                                                                                                                                                                                                                                                                                                                                                                                                                                                                                                                                                                                                                                                                                                                                                                                                                      |   |          |          |          |   |          |          |          |   |          |         |          |   |         |          |          |   |          |         |          |   |          |          |          |   |         |          |          |   |          |         |         |   |          |          |         |   |          |          |         |   |          |         |          |   |          |          |          |   |          |          |         |   |          |          |          |   |          |          |          |   |          |          |         |   |          |          |         |   |          |          |          |   |          |          |          |   |          |          |          |   |          |          |          |   |          |          |          |   |          |          |          |   |          |          |         |   |         |          |          |   |          |         |         |   |          |         |         |   |         |          |          |   |         |          |          |   |         |          |          |   |         |          |          |   |          |          |          |   |         |          |          |   |          |          |          |   |          |          |          |
| H                                                                                                                                                                                                                     | -1.67996                                                                                                                                                                                                                                                                                                                                                                                                                                                                                                                                                                                                                                                                                                                                                                                                                                                                                                                                                                                                                                                                                                                                                                                                                                                                                                                                                                                                                                                                                                                                                                                                                                                                                                                                                                                                                                                                                                                                                                                                                                                                                                                                                                                                                                                                                                                                                                                                                                                                                                                                                             | 2.89678  | 2.80443  |         |          |   |          |         |         |   |          |          |          |   |          |         |          |   |          |         |          |   |          |         |          |   |          |          |          |   |          |         |          |   |          |          |         |   |          |          |         |   |          |         |         |   |          |         |          |   |          |         |          |   |          |          |         |   |          |         |         |   |                                                                                                                                                                                                                                                                                                                                                                                                                                                                                                                                                                                                                                                                                                                                                                                                                                                                                                                                                                                                                                                                                                                            |         |         |          |          |          |         |          |          |          |         |         |          |         |          |          |          |         |          |          |          |         |          |         |          |         |          |         |          |          |          |          |          |          |          |          |          |          |          |         |          |          |          |          |          |          |          |         |          |         |          |         |          |          |          |          |         |          |          |         |         |          |         |   |         |         |          |                                                                                                                                                                                                                       |                                                                                                                                                                                                                                                                                                                                                                                                                                                                                                                                                                                                                                                                                                                                                                                                                                                                                                                                                                                                                                                                                                                                                                                                                                                                                                                                                                                                                                                                                                                                                                                                                                                                                                                                                                                                                                                                                                                                                                                                                                                                                                                                                                                                                                                                                                                                                              |         |          |          |         |          |          |         |         |         |         |                                                                                                                                                                                                                        |                                                                                                                                                                                                                                                                                                                                                                                                                                                                                                                                                                                                                                                                                                                                                                                                                                                                                                                                                                                                                                                                                                                                                                                                                                                                                                                                                                                                                                                                                                                                                                                                                                                                                                                                                                                                                                                                                                                                                                                                                                                                                                                                                                                                                                                                                                                                                                                                                                                                                                                                                                                      |   |          |          |          |   |          |          |          |   |          |         |          |   |         |          |          |   |          |         |          |   |          |          |          |   |         |          |          |   |          |         |         |   |          |          |         |   |          |          |         |   |          |         |          |   |          |          |          |   |          |          |         |   |          |          |          |   |          |          |          |   |          |          |         |   |          |          |         |   |          |          |          |   |          |          |          |   |          |          |          |   |          |          |          |   |          |          |          |   |          |          |          |   |          |          |         |   |         |          |          |   |          |         |         |   |          |         |         |   |         |          |          |   |         |          |          |   |         |          |          |   |         |          |          |   |          |          |          |   |         |          |          |   |          |          |          |   |          |          |          |
| H                                                                                                                                                                                                                     | -1.34818                                                                                                                                                                                                                                                                                                                                                                                                                                                                                                                                                                                                                                                                                                                                                                                                                                                                                                                                                                                                                                                                                                                                                                                                                                                                                                                                                                                                                                                                                                                                                                                                                                                                                                                                                                                                                                                                                                                                                                                                                                                                                                                                                                                                                                                                                                                                                                                                                                                                                                                                                             | 1.23371  | 4.61232  |         |          |   |          |         |         |   |          |          |          |   |          |         |          |   |          |         |          |   |          |         |          |   |          |          |          |   |          |         |          |   |          |          |         |   |          |          |         |   |          |         |         |   |          |         |          |   |          |         |          |   |          |          |         |   |          |         |         |   |                                                                                                                                                                                                                                                                                                                                                                                                                                                                                                                                                                                                                                                                                                                                                                                                                                                                                                                                                                                                                                                                                                                            |         |         |          |          |          |         |          |          |          |         |         |          |         |          |          |          |         |          |          |          |         |          |         |          |         |          |         |          |          |          |          |          |          |          |          |          |          |          |         |          |          |          |          |          |          |          |         |          |         |          |         |          |          |          |          |         |          |          |         |         |          |         |   |         |         |          |                                                                                                                                                                                                                       |                                                                                                                                                                                                                                                                                                                                                                                                                                                                                                                                                                                                                                                                                                                                                                                                                                                                                                                                                                                                                                                                                                                                                                                                                                                                                                                                                                                                                                                                                                                                                                                                                                                                                                                                                                                                                                                                                                                                                                                                                                                                                                                                                                                                                                                                                                                                                              |         |          |          |         |          |          |         |         |         |         |                                                                                                                                                                                                                        |                                                                                                                                                                                                                                                                                                                                                                                                                                                                                                                                                                                                                                                                                                                                                                                                                                                                                                                                                                                                                                                                                                                                                                                                                                                                                                                                                                                                                                                                                                                                                                                                                                                                                                                                                                                                                                                                                                                                                                                                                                                                                                                                                                                                                                                                                                                                                                                                                                                                                                                                                                                      |   |          |          |          |   |          |          |          |   |          |         |          |   |         |          |          |   |          |         |          |   |          |          |          |   |         |          |          |   |          |         |         |   |          |          |         |   |          |          |         |   |          |         |          |   |          |          |          |   |          |          |         |   |          |          |          |   |          |          |          |   |          |          |         |   |          |          |         |   |          |          |          |   |          |          |          |   |          |          |          |   |          |          |          |   |          |          |          |   |          |          |          |   |          |          |         |   |         |          |          |   |          |         |         |   |          |         |         |   |         |          |          |   |         |          |          |   |         |          |          |   |         |          |          |   |          |          |          |   |         |          |          |   |          |          |          |   |          |          |          |
| H                                                                                                                                                                                                                     | 1.71339                                                                                                                                                                                                                                                                                                                                                                                                                                                                                                                                                                                                                                                                                                                                                                                                                                                                                                                                                                                                                                                                                                                                                                                                                                                                                                                                                                                                                                                                                                                                                                                                                                                                                                                                                                                                                                                                                                                                                                                                                                                                                                                                                                                                                                                                                                                                                                                                                                                                                                                                                              | -0.64520 | 2.28316  |         |          |   |          |         |         |   |          |          |          |   |          |         |          |   |          |         |          |   |          |         |          |   |          |          |          |   |          |         |          |   |          |          |         |   |          |          |         |   |          |         |         |   |          |         |          |   |          |         |          |   |          |          |         |   |          |         |         |   |                                                                                                                                                                                                                                                                                                                                                                                                                                                                                                                                                                                                                                                                                                                                                                                                                                                                                                                                                                                                                                                                                                                            |         |         |          |          |          |         |          |          |          |         |         |          |         |          |          |          |         |          |          |          |         |          |         |          |         |          |         |          |          |          |          |          |          |          |          |          |          |          |         |          |          |          |          |          |          |          |         |          |         |          |         |          |          |          |          |         |          |          |         |         |          |         |   |         |         |          |                                                                                                                                                                                                                       |                                                                                                                                                                                                                                                                                                                                                                                                                                                                                                                                                                                                                                                                                                                                                                                                                                                                                                                                                                                                                                                                                                                                                                                                                                                                                                                                                                                                                                                                                                                                                                                                                                                                                                                                                                                                                                                                                                                                                                                                                                                                                                                                                                                                                                                                                                                                                              |         |          |          |         |          |          |         |         |         |         |                                                                                                                                                                                                                        |                                                                                                                                                                                                                                                                                                                                                                                                                                                                                                                                                                                                                                                                                                                                                                                                                                                                                                                                                                                                                                                                                                                                                                                                                                                                                                                                                                                                                                                                                                                                                                                                                                                                                                                                                                                                                                                                                                                                                                                                                                                                                                                                                                                                                                                                                                                                                                                                                                                                                                                                                                                      |   |          |          |          |   |          |          |          |   |          |         |          |   |         |          |          |   |          |         |          |   |          |          |          |   |         |          |          |   |          |         |         |   |          |          |         |   |          |          |         |   |          |         |          |   |          |          |          |   |          |          |         |   |          |          |          |   |          |          |          |   |          |          |         |   |          |          |         |   |          |          |          |   |          |          |          |   |          |          |          |   |          |          |          |   |          |          |          |   |          |          |          |   |          |          |         |   |         |          |          |   |          |         |         |   |          |         |         |   |         |          |          |   |         |          |          |   |         |          |          |   |         |          |          |   |          |          |          |   |         |          |          |   |          |          |          |   |          |          |          |
| H                                                                                                                                                                                                                     | 0.35779                                                                                                                                                                                                                                                                                                                                                                                                                                                                                                                                                                                                                                                                                                                                                                                                                                                                                                                                                                                                                                                                                                                                                                                                                                                                                                                                                                                                                                                                                                                                                                                                                                                                                                                                                                                                                                                                                                                                                                                                                                                                                                                                                                                                                                                                                                                                                                                                                                                                                                                                                              | -0.55039 | 4.32669  |         |          |   |          |         |         |   |          |          |          |   |          |         |          |   |          |         |          |   |          |         |          |   |          |          |          |   |          |         |          |   |          |          |         |   |          |          |         |   |          |         |         |   |          |         |          |   |          |         |          |   |          |          |         |   |          |         |         |   |                                                                                                                                                                                                                                                                                                                                                                                                                                                                                                                                                                                                                                                                                                                                                                                                                                                                                                                                                                                                                                                                                                                            |         |         |          |          |          |         |          |          |          |         |         |          |         |          |          |          |         |          |          |          |         |          |         |          |         |          |         |          |          |          |          |          |          |          |          |          |          |          |         |          |          |          |          |          |          |          |         |          |         |          |         |          |          |          |          |         |          |          |         |         |          |         |   |         |         |          |                                                                                                                                                                                                                       |                                                                                                                                                                                                                                                                                                                                                                                                                                                                                                                                                                                                                                                                                                                                                                                                                                                                                                                                                                                                                                                                                                                                                                                                                                                                                                                                                                                                                                                                                                                                                                                                                                                                                                                                                                                                                                                                                                                                                                                                                                                                                                                                                                                                                                                                                                                                                              |         |          |          |         |          |          |         |         |         |         |                                                                                                                                                                                                                        |                                                                                                                                                                                                                                                                                                                                                                                                                                                                                                                                                                                                                                                                                                                                                                                                                                                                                                                                                                                                                                                                                                                                                                                                                                                                                                                                                                                                                                                                                                                                                                                                                                                                                                                                                                                                                                                                                                                                                                                                                                                                                                                                                                                                                                                                                                                                                                                                                                                                                                                                                                                      |   |          |          |          |   |          |          |          |   |          |         |          |   |         |          |          |   |          |         |          |   |          |          |          |   |         |          |          |   |          |         |         |   |          |          |         |   |          |          |         |   |          |         |          |   |          |          |          |   |          |          |         |   |          |          |          |   |          |          |          |   |          |          |         |   |          |          |         |   |          |          |          |   |          |          |          |   |          |          |          |   |          |          |          |   |          |          |          |   |          |          |          |   |          |          |         |   |         |          |          |   |          |         |         |   |          |         |         |   |         |          |          |   |         |          |          |   |         |          |          |   |         |          |          |   |          |          |          |   |         |          |          |   |          |          |          |   |          |          |          |
| C                                                                                                                                                                                                                     | -1.18254                                                                                                                                                                                                                                                                                                                                                                                                                                                                                                                                                                                                                                                                                                                                                                                                                                                                                                                                                                                                                                                                                                                                                                                                                                                                                                                                                                                                                                                                                                                                                                                                                                                                                                                                                                                                                                                                                                                                                                                                                                                                                                                                                                                                                                                                                                                                                                                                                                                                                                                                                             | 1.39958  | -1.26776 |         |          |   |          |         |         |   |          |          |          |   |          |         |          |   |          |         |          |   |          |         |          |   |          |          |          |   |          |         |          |   |          |          |         |   |          |          |         |   |          |         |         |   |          |         |          |   |          |         |          |   |          |          |         |   |          |         |         |   |                                                                                                                                                                                                                                                                                                                                                                                                                                                                                                                                                                                                                                                                                                                                                                                                                                                                                                                                                                                                                                                                                                                            |         |         |          |          |          |         |          |          |          |         |         |          |         |          |          |          |         |          |          |          |         |          |         |          |         |          |         |          |          |          |          |          |          |          |          |          |          |          |         |          |          |          |          |          |          |          |         |          |         |          |         |          |          |          |          |         |          |          |         |         |          |         |   |         |         |          |                                                                                                                                                                                                                       |                                                                                                                                                                                                                                                                                                                                                                                                                                                                                                                                                                                                                                                                                                                                                                                                                                                                                                                                                                                                                                                                                                                                                                                                                                                                                                                                                                                                                                                                                                                                                                                                                                                                                                                                                                                                                                                                                                                                                                                                                                                                                                                                                                                                                                                                                                                                                              |         |          |          |         |          |          |         |         |         |         |                                                                                                                                                                                                                        |                                                                                                                                                                                                                                                                                                                                                                                                                                                                                                                                                                                                                                                                                                                                                                                                                                                                                                                                                                                                                                                                                                                                                                                                                                                                                                                                                                                                                                                                                                                                                                                                                                                                                                                                                                                                                                                                                                                                                                                                                                                                                                                                                                                                                                                                                                                                                                                                                                                                                                                                                                                      |   |          |          |          |   |          |          |          |   |          |         |          |   |         |          |          |   |          |         |          |   |          |          |          |   |         |          |          |   |          |         |         |   |          |          |         |   |          |          |         |   |          |         |          |   |          |          |          |   |          |          |         |   |          |          |          |   |          |          |          |   |          |          |         |   |          |          |         |   |          |          |          |   |          |          |          |   |          |          |          |   |          |          |          |   |          |          |          |   |          |          |          |   |          |          |         |   |         |          |          |   |          |         |         |   |          |         |         |   |         |          |          |   |         |          |          |   |         |          |          |   |         |          |          |   |          |          |          |   |         |          |          |   |          |          |          |   |          |          |          |
| H                                                                                                                                                                                                                     | -0.96730                                                                                                                                                                                                                                                                                                                                                                                                                                                                                                                                                                                                                                                                                                                                                                                                                                                                                                                                                                                                                                                                                                                                                                                                                                                                                                                                                                                                                                                                                                                                                                                                                                                                                                                                                                                                                                                                                                                                                                                                                                                                                                                                                                                                                                                                                                                                                                                                                                                                                                                                                             | 0.71997  | -0.44540 |         |          |   |          |         |         |   |          |          |          |   |          |         |          |   |          |         |          |   |          |         |          |   |          |          |          |   |          |         |          |   |          |          |         |   |          |          |         |   |          |         |         |   |          |         |          |   |          |         |          |   |          |          |         |   |          |         |         |   |                                                                                                                                                                                                                                                                                                                                                                                                                                                                                                                                                                                                                                                                                                                                                                                                                                                                                                                                                                                                                                                                                                                            |         |         |          |          |          |         |          |          |          |         |         |          |         |          |          |          |         |          |          |          |         |          |         |          |         |          |         |          |          |          |          |          |          |          |          |          |          |          |         |          |          |          |          |          |          |          |         |          |         |          |         |          |          |          |          |         |          |          |         |         |          |         |   |         |         |          |                                                                                                                                                                                                                       |                                                                                                                                                                                                                                                                                                                                                                                                                                                                                                                                                                                                                                                                                                                                                                                                                                                                                                                                                                                                                                                                                                                                                                                                                                                                                                                                                                                                                                                                                                                                                                                                                                                                                                                                                                                                                                                                                                                                                                                                                                                                                                                                                                                                                                                                                                                                                              |         |          |          |         |          |          |         |         |         |         |                                                                                                                                                                                                                        |                                                                                                                                                                                                                                                                                                                                                                                                                                                                                                                                                                                                                                                                                                                                                                                                                                                                                                                                                                                                                                                                                                                                                                                                                                                                                                                                                                                                                                                                                                                                                                                                                                                                                                                                                                                                                                                                                                                                                                                                                                                                                                                                                                                                                                                                                                                                                                                                                                                                                                                                                                                      |   |          |          |          |   |          |          |          |   |          |         |          |   |         |          |          |   |          |         |          |   |          |          |          |   |         |          |          |   |          |         |         |   |          |          |         |   |          |          |         |   |          |         |          |   |          |          |          |   |          |          |         |   |          |          |          |   |          |          |          |   |          |          |         |   |          |          |         |   |          |          |          |   |          |          |          |   |          |          |          |   |          |          |          |   |          |          |          |   |          |          |          |   |          |          |         |   |         |          |          |   |          |         |         |   |          |         |         |   |         |          |          |   |         |          |          |   |         |          |          |   |         |          |          |   |          |          |          |   |         |          |          |   |          |          |          |   |          |          |          |
| H                                                                                                                                                                                                                     | -0.18327                                                                                                                                                                                                                                                                                                                                                                                                                                                                                                                                                                                                                                                                                                                                                                                                                                                                                                                                                                                                                                                                                                                                                                                                                                                                                                                                                                                                                                                                                                                                                                                                                                                                                                                                                                                                                                                                                                                                                                                                                                                                                                                                                                                                                                                                                                                                                                                                                                                                                                                                                             | 6.50714  | 0.20863  |         |          |   |          |         |         |   |          |          |          |   |          |         |          |   |          |         |          |   |          |         |          |   |          |          |          |   |          |         |          |   |          |          |         |   |          |          |         |   |          |         |         |   |          |         |          |   |          |         |          |   |          |          |         |   |          |         |         |   |                                                                                                                                                                                                                                                                                                                                                                                                                                                                                                                                                                                                                                                                                                                                                                                                                                                                                                                                                                                                                                                                                                                            |         |         |          |          |          |         |          |          |          |         |         |          |         |          |          |          |         |          |          |          |         |          |         |          |         |          |         |          |          |          |          |          |          |          |          |          |          |          |         |          |          |          |          |          |          |          |         |          |         |          |         |          |          |          |          |         |          |          |         |         |          |         |   |         |         |          |                                                                                                                                                                                                                       |                                                                                                                                                                                                                                                                                                                                                                                                                                                                                                                                                                                                                                                                                                                                                                                                                                                                                                                                                                                                                                                                                                                                                                                                                                                                                                                                                                                                                                                                                                                                                                                                                                                                                                                                                                                                                                                                                                                                                                                                                                                                                                                                                                                                                                                                                                                                                              |         |          |          |         |          |          |         |         |         |         |                                                                                                                                                                                                                        |                                                                                                                                                                                                                                                                                                                                                                                                                                                                                                                                                                                                                                                                                                                                                                                                                                                                                                                                                                                                                                                                                                                                                                                                                                                                                                                                                                                                                                                                                                                                                                                                                                                                                                                                                                                                                                                                                                                                                                                                                                                                                                                                                                                                                                                                                                                                                                                                                                                                                                                                                                                      |   |          |          |          |   |          |          |          |   |          |         |          |   |         |          |          |   |          |         |          |   |          |          |          |   |         |          |          |   |          |         |         |   |          |          |         |   |          |          |         |   |          |         |          |   |          |          |          |   |          |          |         |   |          |          |          |   |          |          |          |   |          |          |         |   |          |          |         |   |          |          |          |   |          |          |          |   |          |          |          |   |          |          |          |   |          |          |          |   |          |          |          |   |          |          |         |   |         |          |          |   |          |         |         |   |          |         |         |   |         |          |          |   |         |          |          |   |         |          |          |   |         |          |          |   |          |          |          |   |         |          |          |   |          |          |          |   |          |          |          |
| H                                                                                                                                                                                                                     | -0.94971                                                                                                                                                                                                                                                                                                                                                                                                                                                                                                                                                                                                                                                                                                                                                                                                                                                                                                                                                                                                                                                                                                                                                                                                                                                                                                                                                                                                                                                                                                                                                                                                                                                                                                                                                                                                                                                                                                                                                                                                                                                                                                                                                                                                                                                                                                                                                                                                                                                                                                                                                             | 5.97301  | -2.09843 |         |          |   |          |         |         |   |          |          |          |   |          |         |          |   |          |         |          |   |          |         |          |   |          |          |          |   |          |         |          |   |          |          |         |   |          |          |         |   |          |         |         |   |          |         |          |   |          |         |          |   |          |          |         |   |          |         |         |   |                                                                                                                                                                                                                                                                                                                                                                                                                                                                                                                                                                                                                                                                                                                                                                                                                                                                                                                                                                                                                                                                                                                            |         |         |          |          |          |         |          |          |          |         |         |          |         |          |          |          |         |          |          |          |         |          |         |          |         |          |         |          |          |          |          |          |          |          |          |          |          |          |         |          |          |          |          |          |          |          |         |          |         |          |         |          |          |          |          |         |          |          |         |         |          |         |   |         |         |          |                                                                                                                                                                                                                       |                                                                                                                                                                                                                                                                                                                                                                                                                                                                                                                                                                                                                                                                                                                                                                                                                                                                                                                                                                                                                                                                                                                                                                                                                                                                                                                                                                                                                                                                                                                                                                                                                                                                                                                                                                                                                                                                                                                                                                                                                                                                                                                                                                                                                                                                                                                                                              |         |          |          |         |          |          |         |         |         |         |                                                                                                                                                                                                                        |                                                                                                                                                                                                                                                                                                                                                                                                                                                                                                                                                                                                                                                                                                                                                                                                                                                                                                                                                                                                                                                                                                                                                                                                                                                                                                                                                                                                                                                                                                                                                                                                                                                                                                                                                                                                                                                                                                                                                                                                                                                                                                                                                                                                                                                                                                                                                                                                                                                                                                                                                                                      |   |          |          |          |   |          |          |          |   |          |         |          |   |         |          |          |   |          |         |          |   |          |          |          |   |         |          |          |   |          |         |         |   |          |          |         |   |          |          |         |   |          |         |          |   |          |          |          |   |          |          |         |   |          |          |          |   |          |          |          |   |          |          |         |   |          |          |         |   |          |          |          |   |          |          |          |   |          |          |          |   |          |          |          |   |          |          |          |   |          |          |          |   |          |          |         |   |         |          |          |   |          |         |         |   |          |         |         |   |         |          |          |   |         |          |          |   |         |          |          |   |         |          |          |   |          |          |          |   |         |          |          |   |          |          |          |   |          |          |          |
| C                                                                                                                                                                                                                     | -2.67701                                                                                                                                                                                                                                                                                                                                                                                                                                                                                                                                                                                                                                                                                                                                                                                                                                                                                                                                                                                                                                                                                                                                                                                                                                                                                                                                                                                                                                                                                                                                                                                                                                                                                                                                                                                                                                                                                                                                                                                                                                                                                                                                                                                                                                                                                                                                                                                                                                                                                                                                                             | 1.26765  | -1.59420 |         |          |   |          |         |         |   |          |          |          |   |          |         |          |   |          |         |          |   |          |         |          |   |          |          |          |   |          |         |          |   |          |          |         |   |          |          |         |   |          |         |         |   |          |         |          |   |          |         |          |   |          |          |         |   |          |         |         |   |                                                                                                                                                                                                                                                                                                                                                                                                                                                                                                                                                                                                                                                                                                                                                                                                                                                                                                                                                                                                                                                                                                                            |         |         |          |          |          |         |          |          |          |         |         |          |         |          |          |          |         |          |          |          |         |          |         |          |         |          |         |          |          |          |          |          |          |          |          |          |          |          |         |          |          |          |          |          |          |          |         |          |         |          |         |          |          |          |          |         |          |          |         |         |          |         |   |         |         |          |                                                                                                                                                                                                                       |                                                                                                                                                                                                                                                                                                                                                                                                                                                                                                                                                                                                                                                                                                                                                                                                                                                                                                                                                                                                                                                                                                                                                                                                                                                                                                                                                                                                                                                                                                                                                                                                                                                                                                                                                                                                                                                                                                                                                                                                                                                                                                                                                                                                                                                                                                                                                              |         |          |          |         |          |          |         |         |         |         |                                                                                                                                                                                                                        |                                                                                                                                                                                                                                                                                                                                                                                                                                                                                                                                                                                                                                                                                                                                                                                                                                                                                                                                                                                                                                                                                                                                                                                                                                                                                                                                                                                                                                                                                                                                                                                                                                                                                                                                                                                                                                                                                                                                                                                                                                                                                                                                                                                                                                                                                                                                                                                                                                                                                                                                                                                      |   |          |          |          |   |          |          |          |   |          |         |          |   |         |          |          |   |          |         |          |   |          |          |          |   |         |          |          |   |          |         |         |   |          |          |         |   |          |          |         |   |          |         |          |   |          |          |          |   |          |          |         |   |          |          |          |   |          |          |          |   |          |          |         |   |          |          |         |   |          |          |          |   |          |          |          |   |          |          |          |   |          |          |          |   |          |          |          |   |          |          |          |   |          |          |         |   |         |          |          |   |          |         |         |   |          |         |         |   |         |          |          |   |         |          |          |   |         |          |          |   |         |          |          |   |          |          |          |   |         |          |          |   |          |          |          |   |          |          |          |
| H                                                                                                                                                                                                                     | -2.94961                                                                                                                                                                                                                                                                                                                                                                                                                                                                                                                                                                                                                                                                                                                                                                                                                                                                                                                                                                                                                                                                                                                                                                                                                                                                                                                                                                                                                                                                                                                                                                                                                                                                                                                                                                                                                                                                                                                                                                                                                                                                                                                                                                                                                                                                                                                                                                                                                                                                                                                                                             | 1.92348  | -2.42431 |         |          |   |          |         |         |   |          |          |          |   |          |         |          |   |          |         |          |   |          |         |          |   |          |          |          |   |          |         |          |   |          |          |         |   |          |          |         |   |          |         |         |   |          |         |          |   |          |         |          |   |          |          |         |   |          |         |         |   |                                                                                                                                                                                                                                                                                                                                                                                                                                                                                                                                                                                                                                                                                                                                                                                                                                                                                                                                                                                                                                                                                                                            |         |         |          |          |          |         |          |          |          |         |         |          |         |          |          |          |         |          |          |          |         |          |         |          |         |          |         |          |          |          |          |          |          |          |          |          |          |          |         |          |          |          |          |          |          |          |         |          |         |          |         |          |          |          |          |         |          |          |         |         |          |         |   |         |         |          |                                                                                                                                                                                                                       |                                                                                                                                                                                                                                                                                                                                                                                                                                                                                                                                                                                                                                                                                                                                                                                                                                                                                                                                                                                                                                                                                                                                                                                                                                                                                                                                                                                                                                                                                                                                                                                                                                                                                                                                                                                                                                                                                                                                                                                                                                                                                                                                                                                                                                                                                                                                                              |         |          |          |         |          |          |         |         |         |         |                                                                                                                                                                                                                        |                                                                                                                                                                                                                                                                                                                                                                                                                                                                                                                                                                                                                                                                                                                                                                                                                                                                                                                                                                                                                                                                                                                                                                                                                                                                                                                                                                                                                                                                                                                                                                                                                                                                                                                                                                                                                                                                                                                                                                                                                                                                                                                                                                                                                                                                                                                                                                                                                                                                                                                                                                                      |   |          |          |          |   |          |          |          |   |          |         |          |   |         |          |          |   |          |         |          |   |          |          |          |   |         |          |          |   |          |         |         |   |          |          |         |   |          |          |         |   |          |         |          |   |          |          |          |   |          |          |         |   |          |          |          |   |          |          |          |   |          |          |         |   |          |          |         |   |          |          |          |   |          |          |          |   |          |          |          |   |          |          |          |   |          |          |          |   |          |          |          |   |          |          |         |   |         |          |          |   |          |         |         |   |          |         |         |   |         |          |          |   |         |          |          |   |         |          |          |   |         |          |          |   |          |          |          |   |         |          |          |   |          |          |          |   |          |          |          |
| H                                                                                                                                                                                                                     | -3.29102                                                                                                                                                                                                                                                                                                                                                                                                                                                                                                                                                                                                                                                                                                                                                                                                                                                                                                                                                                                                                                                                                                                                                                                                                                                                                                                                                                                                                                                                                                                                                                                                                                                                                                                                                                                                                                                                                                                                                                                                                                                                                                                                                                                                                                                                                                                                                                                                                                                                                                                                                             | 1.53824  | -0.73305 |         |          |   |          |         |         |   |          |          |          |   |          |         |          |   |          |         |          |   |          |         |          |   |          |          |          |   |          |         |          |   |          |          |         |   |          |          |         |   |          |         |         |   |          |         |          |   |          |         |          |   |          |          |         |   |          |         |         |   |                                                                                                                                                                                                                                                                                                                                                                                                                                                                                                                                                                                                                                                                                                                                                                                                                                                                                                                                                                                                                                                                                                                            |         |         |          |          |          |         |          |          |          |         |         |          |         |          |          |          |         |          |          |          |         |          |         |          |         |          |         |          |          |          |          |          |          |          |          |          |          |          |         |          |          |          |          |          |          |          |         |          |         |          |         |          |          |          |          |         |          |          |         |         |          |         |   |         |         |          |                                                                                                                                                                                                                       |                                                                                                                                                                                                                                                                                                                                                                                                                                                                                                                                                                                                                                                                                                                                                                                                                                                                                                                                                                                                                                                                                                                                                                                                                                                                                                                                                                                                                                                                                                                                                                                                                                                                                                                                                                                                                                                                                                                                                                                                                                                                                                                                                                                                                                                                                                                                                              |         |          |          |         |          |          |         |         |         |         |                                                                                                                                                                                                                        |                                                                                                                                                                                                                                                                                                                                                                                                                                                                                                                                                                                                                                                                                                                                                                                                                                                                                                                                                                                                                                                                                                                                                                                                                                                                                                                                                                                                                                                                                                                                                                                                                                                                                                                                                                                                                                                                                                                                                                                                                                                                                                                                                                                                                                                                                                                                                                                                                                                                                                                                                                                      |   |          |          |          |   |          |          |          |   |          |         |          |   |         |          |          |   |          |         |          |   |          |          |          |   |         |          |          |   |          |         |         |   |          |          |         |   |          |          |         |   |          |         |          |   |          |          |          |   |          |          |         |   |          |          |          |   |          |          |          |   |          |          |         |   |          |          |         |   |          |          |          |   |          |          |          |   |          |          |          |   |          |          |          |   |          |          |          |   |          |          |          |   |          |          |         |   |         |          |          |   |          |         |         |   |          |         |         |   |         |          |          |   |         |          |          |   |         |          |          |   |         |          |          |   |          |          |          |   |         |          |          |   |          |          |          |   |          |          |          |
| H                                                                                                                                                                                                                     | -2.91307                                                                                                                                                                                                                                                                                                                                                                                                                                                                                                                                                                                                                                                                                                                                                                                                                                                                                                                                                                                                                                                                                                                                                                                                                                                                                                                                                                                                                                                                                                                                                                                                                                                                                                                                                                                                                                                                                                                                                                                                                                                                                                                                                                                                                                                                                                                                                                                                                                                                                                                                                             | 0.23982  | -1.88103 |         |          |   |          |         |         |   |          |          |          |   |          |         |          |   |          |         |          |   |          |         |          |   |          |          |          |   |          |         |          |   |          |          |         |   |          |          |         |   |          |         |         |   |          |         |          |   |          |         |          |   |          |          |         |   |          |         |         |   |                                                                                                                                                                                                                                                                                                                                                                                                                                                                                                                                                                                                                                                                                                                                                                                                                                                                                                                                                                                                                                                                                                                            |         |         |          |          |          |         |          |          |          |         |         |          |         |          |          |          |         |          |          |          |         |          |         |          |         |          |         |          |          |          |          |          |          |          |          |          |          |          |         |          |          |          |          |          |          |          |         |          |         |          |         |          |          |          |          |         |          |          |         |         |          |         |   |         |         |          |                                                                                                                                                                                                                       |                                                                                                                                                                                                                                                                                                                                                                                                                                                                                                                                                                                                                                                                                                                                                                                                                                                                                                                                                                                                                                                                                                                                                                                                                                                                                                                                                                                                                                                                                                                                                                                                                                                                                                                                                                                                                                                                                                                                                                                                                                                                                                                                                                                                                                                                                                                                                              |         |          |          |         |          |          |         |         |         |         |                                                                                                                                                                                                                        |                                                                                                                                                                                                                                                                                                                                                                                                                                                                                                                                                                                                                                                                                                                                                                                                                                                                                                                                                                                                                                                                                                                                                                                                                                                                                                                                                                                                                                                                                                                                                                                                                                                                                                                                                                                                                                                                                                                                                                                                                                                                                                                                                                                                                                                                                                                                                                                                                                                                                                                                                                                      |   |          |          |          |   |          |          |          |   |          |         |          |   |         |          |          |   |          |         |          |   |          |          |          |   |         |          |          |   |          |         |         |   |          |          |         |   |          |          |         |   |          |         |          |   |          |          |          |   |          |          |         |   |          |          |          |   |          |          |          |   |          |          |         |   |          |          |         |   |          |          |          |   |          |          |          |   |          |          |          |   |          |          |          |   |          |          |          |   |          |          |          |   |          |          |         |   |         |          |          |   |          |         |         |   |          |         |         |   |         |          |          |   |         |          |          |   |         |          |          |   |         |          |          |   |          |          |          |   |         |          |          |   |          |          |          |   |          |          |          |
| C                                                                                                                                                                                                                     | -0.33036                                                                                                                                                                                                                                                                                                                                                                                                                                                                                                                                                                                                                                                                                                                                                                                                                                                                                                                                                                                                                                                                                                                                                                                                                                                                                                                                                                                                                                                                                                                                                                                                                                                                                                                                                                                                                                                                                                                                                                                                                                                                                                                                                                                                                                                                                                                                                                                                                                                                                                                                                             | 0.97051  | -2.46831 |         |          |   |          |         |         |   |          |          |          |   |          |         |          |   |          |         |          |   |          |         |          |   |          |          |          |   |          |         |          |   |          |          |         |   |          |          |         |   |          |         |         |   |          |         |          |   |          |         |          |   |          |          |         |   |          |         |         |   |                                                                                                                                                                                                                                                                                                                                                                                                                                                                                                                                                                                                                                                                                                                                                                                                                                                                                                                                                                                                                                                                                                                            |         |         |          |          |          |         |          |          |          |         |         |          |         |          |          |          |         |          |          |          |         |          |         |          |         |          |         |          |          |          |          |          |          |          |          |          |          |          |         |          |          |          |          |          |          |          |         |          |         |          |         |          |          |          |          |         |          |          |         |         |          |         |   |         |         |          |                                                                                                                                                                                                                       |                                                                                                                                                                                                                                                                                                                                                                                                                                                                                                                                                                                                                                                                                                                                                                                                                                                                                                                                                                                                                                                                                                                                                                                                                                                                                                                                                                                                                                                                                                                                                                                                                                                                                                                                                                                                                                                                                                                                                                                                                                                                                                                                                                                                                                                                                                                                                              |         |          |          |         |          |          |         |         |         |         |                                                                                                                                                                                                                        |                                                                                                                                                                                                                                                                                                                                                                                                                                                                                                                                                                                                                                                                                                                                                                                                                                                                                                                                                                                                                                                                                                                                                                                                                                                                                                                                                                                                                                                                                                                                                                                                                                                                                                                                                                                                                                                                                                                                                                                                                                                                                                                                                                                                                                                                                                                                                                                                                                                                                                                                                                                      |   |          |          |          |   |          |          |          |   |          |         |          |   |         |          |          |   |          |         |          |   |          |          |          |   |         |          |          |   |          |         |         |   |          |          |         |   |          |          |         |   |          |         |          |   |          |          |          |   |          |          |         |   |          |          |          |   |          |          |          |   |          |          |         |   |          |          |         |   |          |          |          |   |          |          |          |   |          |          |          |   |          |          |          |   |          |          |          |   |          |          |          |   |          |          |         |   |         |          |          |   |          |         |         |   |          |         |         |   |         |          |          |   |         |          |          |   |         |          |          |   |         |          |          |   |          |          |          |   |         |          |          |   |          |          |          |   |          |          |          |
| H                                                                                                                                                                                                                     | -0.54775                                                                                                                                                                                                                                                                                                                                                                                                                                                                                                                                                                                                                                                                                                                                                                                                                                                                                                                                                                                                                                                                                                                                                                                                                                                                                                                                                                                                                                                                                                                                                                                                                                                                                                                                                                                                                                                                                                                                                                                                                                                                                                                                                                                                                                                                                                                                                                                                                                                                                                                                                             | 1.59439  | -3.33857 |         |          |   |          |         |         |   |          |          |          |   |          |         |          |   |          |         |          |   |          |         |          |   |          |          |          |   |          |         |          |   |          |          |         |   |          |          |         |   |          |         |         |   |          |         |          |   |          |         |          |   |          |          |         |   |          |         |         |   |                                                                                                                                                                                                                                                                                                                                                                                                                                                                                                                                                                                                                                                                                                                                                                                                                                                                                                                                                                                                                                                                                                                            |         |         |          |          |          |         |          |          |          |         |         |          |         |          |          |          |         |          |          |          |         |          |         |          |         |          |         |          |          |          |          |          |          |          |          |          |          |          |         |          |          |          |          |          |          |          |         |          |         |          |         |          |          |          |          |         |          |          |         |         |          |         |   |         |         |          |                                                                                                                                                                                                                       |                                                                                                                                                                                                                                                                                                                                                                                                                                                                                                                                                                                                                                                                                                                                                                                                                                                                                                                                                                                                                                                                                                                                                                                                                                                                                                                                                                                                                                                                                                                                                                                                                                                                                                                                                                                                                                                                                                                                                                                                                                                                                                                                                                                                                                                                                                                                                              |         |          |          |         |          |          |         |         |         |         |                                                                                                                                                                                                                        |                                                                                                                                                                                                                                                                                                                                                                                                                                                                                                                                                                                                                                                                                                                                                                                                                                                                                                                                                                                                                                                                                                                                                                                                                                                                                                                                                                                                                                                                                                                                                                                                                                                                                                                                                                                                                                                                                                                                                                                                                                                                                                                                                                                                                                                                                                                                                                                                                                                                                                                                                                                      |   |          |          |          |   |          |          |          |   |          |         |          |   |         |          |          |   |          |         |          |   |          |          |          |   |         |          |          |   |          |         |         |   |          |          |         |   |          |          |         |   |          |         |          |   |          |          |          |   |          |          |         |   |          |          |          |   |          |          |          |   |          |          |         |   |          |          |         |   |          |          |          |   |          |          |          |   |          |          |          |   |          |          |          |   |          |          |          |   |          |          |          |   |          |          |         |   |         |          |          |   |          |         |         |   |          |         |         |   |         |          |          |   |         |          |          |   |         |          |          |   |         |          |          |   |          |          |          |   |         |          |          |   |          |          |          |   |          |          |          |
| H                                                                                                                                                                                                                     | -0.54781                                                                                                                                                                                                                                                                                                                                                                                                                                                                                                                                                                                                                                                                                                                                                                                                                                                                                                                                                                                                                                                                                                                                                                                                                                                                                                                                                                                                                                                                                                                                                                                                                                                                                                                                                                                                                                                                                                                                                                                                                                                                                                                                                                                                                                                                                                                                                                                                                                                                                                                                                             | -0.06669 | -2.73577 |         |          |   |          |         |         |   |          |          |          |   |          |         |          |   |          |         |          |   |          |         |          |   |          |          |          |   |          |         |          |   |          |          |         |   |          |          |         |   |          |         |         |   |          |         |          |   |          |         |          |   |          |          |         |   |          |         |         |   |                                                                                                                                                                                                                                                                                                                                                                                                                                                                                                                                                                                                                                                                                                                                                                                                                                                                                                                                                                                                                                                                                                                            |         |         |          |          |          |         |          |          |          |         |         |          |         |          |          |          |         |          |          |          |         |          |         |          |         |          |         |          |          |          |          |          |          |          |          |          |          |          |         |          |          |          |          |          |          |          |         |          |         |          |         |          |          |          |          |         |          |          |         |         |          |         |   |         |         |          |                                                                                                                                                                                                                       |                                                                                                                                                                                                                                                                                                                                                                                                                                                                                                                                                                                                                                                                                                                                                                                                                                                                                                                                                                                                                                                                                                                                                                                                                                                                                                                                                                                                                                                                                                                                                                                                                                                                                                                                                                                                                                                                                                                                                                                                                                                                                                                                                                                                                                                                                                                                                              |         |          |          |         |          |          |         |         |         |         |                                                                                                                                                                                                                        |                                                                                                                                                                                                                                                                                                                                                                                                                                                                                                                                                                                                                                                                                                                                                                                                                                                                                                                                                                                                                                                                                                                                                                                                                                                                                                                                                                                                                                                                                                                                                                                                                                                                                                                                                                                                                                                                                                                                                                                                                                                                                                                                                                                                                                                                                                                                                                                                                                                                                                                                                                                      |   |          |          |          |   |          |          |          |   |          |         |          |   |         |          |          |   |          |         |          |   |          |          |          |   |         |          |          |   |          |         |         |   |          |          |         |   |          |          |         |   |          |         |          |   |          |          |          |   |          |          |         |   |          |          |          |   |          |          |          |   |          |          |         |   |          |          |         |   |          |          |          |   |          |          |          |   |          |          |          |   |          |          |          |   |          |          |          |   |          |          |          |   |          |          |         |   |         |          |          |   |          |         |         |   |          |         |         |   |         |          |          |   |         |          |          |   |         |          |          |   |         |          |          |   |          |          |          |   |         |          |          |   |          |          |          |   |          |          |          |
| H                                                                                                                                                                                                                     | 0.73076                                                                                                                                                                                                                                                                                                                                                                                                                                                                                                                                                                                                                                                                                                                                                                                                                                                                                                                                                                                                                                                                                                                                                                                                                                                                                                                                                                                                                                                                                                                                                                                                                                                                                                                                                                                                                                                                                                                                                                                                                                                                                                                                                                                                                                                                                                                                                                                                                                                                                                                                                              | 1.06092  | -2.23683 |         |          |   |          |         |         |   |          |          |          |   |          |         |          |   |          |         |          |   |          |         |          |   |          |          |          |   |          |         |          |   |          |          |         |   |          |          |         |   |          |         |         |   |          |         |          |   |          |         |          |   |          |          |         |   |          |         |         |   |                                                                                                                                                                                                                                                                                                                                                                                                                                                                                                                                                                                                                                                                                                                                                                                                                                                                                                                                                                                                                                                                                                                            |         |         |          |          |          |         |          |          |          |         |         |          |         |          |          |          |         |          |          |          |         |          |         |          |         |          |         |          |          |          |          |          |          |          |          |          |          |          |         |          |          |          |          |          |          |          |         |          |         |          |         |          |          |          |          |         |          |          |         |         |          |         |   |         |         |          |                                                                                                                                                                                                                       |                                                                                                                                                                                                                                                                                                                                                                                                                                                                                                                                                                                                                                                                                                                                                                                                                                                                                                                                                                                                                                                                                                                                                                                                                                                                                                                                                                                                                                                                                                                                                                                                                                                                                                                                                                                                                                                                                                                                                                                                                                                                                                                                                                                                                                                                                                                                                              |         |          |          |         |          |          |         |         |         |         |                                                                                                                                                                                                                        |                                                                                                                                                                                                                                                                                                                                                                                                                                                                                                                                                                                                                                                                                                                                                                                                                                                                                                                                                                                                                                                                                                                                                                                                                                                                                                                                                                                                                                                                                                                                                                                                                                                                                                                                                                                                                                                                                                                                                                                                                                                                                                                                                                                                                                                                                                                                                                                                                                                                                                                                                                                      |   |          |          |          |   |          |          |          |   |          |         |          |   |         |          |          |   |          |         |          |   |          |          |          |   |         |          |          |   |          |         |         |   |          |          |         |   |          |          |         |   |          |         |          |   |          |          |          |   |          |          |         |   |          |          |          |   |          |          |          |   |          |          |         |   |          |          |         |   |          |          |          |   |          |          |          |   |          |          |          |   |          |          |          |   |          |          |          |   |          |          |          |   |          |          |         |   |         |          |          |   |          |         |         |   |          |         |         |   |         |          |          |   |         |          |          |   |         |          |          |   |         |          |          |   |          |          |          |   |         |          |          |   |          |          |          |   |          |          |          |
| O                                                                                                                                                                                                                     | 1.50344                                                                                                                                                                                                                                                                                                                                                                                                                                                                                                                                                                                                                                                                                                                                                                                                                                                                                                                                                                                                                                                                                                                                                                                                                                                                                                                                                                                                                                                                                                                                                                                                                                                                                                                                                                                                                                                                                                                                                                                                                                                                                                                                                                                                                                                                                                                                                                                                                                                                                                                                                              | 1.09264  | 0.22678  |         |          |   |          |         |         |   |          |          |          |   |          |         |          |   |          |         |          |   |          |         |          |   |          |          |          |   |          |         |          |   |          |          |         |   |          |          |         |   |          |         |         |   |          |         |          |   |          |         |          |   |          |          |         |   |          |         |         |   |                                                                                                                                                                                                                                                                                                                                                                                                                                                                                                                                                                                                                                                                                                                                                                                                                                                                                                                                                                                                                                                                                                                            |         |         |          |          |          |         |          |          |          |         |         |          |         |          |          |          |         |          |          |          |         |          |         |          |         |          |         |          |          |          |          |          |          |          |          |          |          |          |         |          |          |          |          |          |          |          |         |          |         |          |         |          |          |          |          |         |          |          |         |         |          |         |   |         |         |          |                                                                                                                                                                                                                       |                                                                                                                                                                                                                                                                                                                                                                                                                                                                                                                                                                                                                                                                                                                                                                                                                                                                                                                                                                                                                                                                                                                                                                                                                                                                                                                                                                                                                                                                                                                                                                                                                                                                                                                                                                                                                                                                                                                                                                                                                                                                                                                                                                                                                                                                                                                                                              |         |          |          |         |          |          |         |         |         |         |                                                                                                                                                                                                                        |                                                                                                                                                                                                                                                                                                                                                                                                                                                                                                                                                                                                                                                                                                                                                                                                                                                                                                                                                                                                                                                                                                                                                                                                                                                                                                                                                                                                                                                                                                                                                                                                                                                                                                                                                                                                                                                                                                                                                                                                                                                                                                                                                                                                                                                                                                                                                                                                                                                                                                                                                                                      |   |          |          |          |   |          |          |          |   |          |         |          |   |         |          |          |   |          |         |          |   |          |          |          |   |         |          |          |   |          |         |         |   |          |          |         |   |          |          |         |   |          |         |          |   |          |          |          |   |          |          |         |   |          |          |          |   |          |          |          |   |          |          |         |   |          |          |         |   |          |          |          |   |          |          |          |   |          |          |          |   |          |          |          |   |          |          |          |   |          |          |          |   |          |          |         |   |         |          |          |   |          |         |         |   |          |         |         |   |         |          |          |   |         |          |          |   |         |          |          |   |         |          |          |   |          |          |          |   |         |          |          |   |          |          |          |   |          |          |          |
| C                                                                                                                                                                                                                     | 2.44638                                                                                                                                                                                                                                                                                                                                                                                                                                                                                                                                                                                                                                                                                                                                                                                                                                                                                                                                                                                                                                                                                                                                                                                                                                                                                                                                                                                                                                                                                                                                                                                                                                                                                                                                                                                                                                                                                                                                                                                                                                                                                                                                                                                                                                                                                                                                                                                                                                                                                                                                                              | 0.05924  | 0.00448  |         |          |   |          |         |         |   |          |          |          |   |          |         |          |   |          |         |          |   |          |         |          |   |          |          |          |   |          |         |          |   |          |          |         |   |          |          |         |   |          |         |         |   |          |         |          |   |          |         |          |   |          |          |         |   |          |         |         |   |                                                                                                                                                                                                                                                                                                                                                                                                                                                                                                                                                                                                                                                                                                                                                                                                                                                                                                                                                                                                                                                                                                                            |         |         |          |          |          |         |          |          |          |         |         |          |         |          |          |          |         |          |          |          |         |          |         |          |         |          |         |          |          |          |          |          |          |          |          |          |          |          |         |          |          |          |          |          |          |          |         |          |         |          |         |          |          |          |          |         |          |          |         |         |          |         |   |         |         |          |                                                                                                                                                                                                                       |                                                                                                                                                                                                                                                                                                                                                                                                                                                                                                                                                                                                                                                                                                                                                                                                                                                                                                                                                                                                                                                                                                                                                                                                                                                                                                                                                                                                                                                                                                                                                                                                                                                                                                                                                                                                                                                                                                                                                                                                                                                                                                                                                                                                                                                                                                                                                              |         |          |          |         |          |          |         |         |         |         |                                                                                                                                                                                                                        |                                                                                                                                                                                                                                                                                                                                                                                                                                                                                                                                                                                                                                                                                                                                                                                                                                                                                                                                                                                                                                                                                                                                                                                                                                                                                                                                                                                                                                                                                                                                                                                                                                                                                                                                                                                                                                                                                                                                                                                                                                                                                                                                                                                                                                                                                                                                                                                                                                                                                                                                                                                      |   |          |          |          |   |          |          |          |   |          |         |          |   |         |          |          |   |          |         |          |   |          |          |          |   |         |          |          |   |          |         |         |   |          |          |         |   |          |          |         |   |          |         |          |   |          |          |          |   |          |          |         |   |          |          |          |   |          |          |          |   |          |          |         |   |          |          |         |   |          |          |          |   |          |          |          |   |          |          |          |   |          |          |          |   |          |          |          |   |          |          |          |   |          |          |         |   |         |          |          |   |          |         |         |   |          |         |         |   |         |          |          |   |         |          |          |   |         |          |          |   |         |          |          |   |          |          |          |   |         |          |          |   |          |          |          |   |          |          |          |
| H                                                                                                                                                                                                                     | 2.87540                                                                                                                                                                                                                                                                                                                                                                                                                                                                                                                                                                                                                                                                                                                                                                                                                                                                                                                                                                                                                                                                                                                                                                                                                                                                                                                                                                                                                                                                                                                                                                                                                                                                                                                                                                                                                                                                                                                                                                                                                                                                                                                                                                                                                                                                                                                                                                                                                                                                                                                                                              | 0.24929  | -0.97711 |         |          |   |          |         |         |   |          |          |          |   |          |         |          |   |          |         |          |   |          |         |          |   |          |          |          |   |          |         |          |   |          |          |         |   |          |          |         |   |          |         |         |   |          |         |          |   |          |         |          |   |          |          |         |   |          |         |         |   |                                                                                                                                                                                                                                                                                                                                                                                                                                                                                                                                                                                                                                                                                                                                                                                                                                                                                                                                                                                                                                                                                                                            |         |         |          |          |          |         |          |          |          |         |         |          |         |          |          |          |         |          |          |          |         |          |         |          |         |          |         |          |          |          |          |          |          |          |          |          |          |          |         |          |          |          |          |          |          |          |         |          |         |          |         |          |          |          |          |         |          |          |         |         |          |         |   |         |         |          |                                                                                                                                                                                                                       |                                                                                                                                                                                                                                                                                                                                                                                                                                                                                                                                                                                                                                                                                                                                                                                                                                                                                                                                                                                                                                                                                                                                                                                                                                                                                                                                                                                                                                                                                                                                                                                                                                                                                                                                                                                                                                                                                                                                                                                                                                                                                                                                                                                                                                                                                                                                                              |         |          |          |         |          |          |         |         |         |         |                                                                                                                                                                                                                        |                                                                                                                                                                                                                                                                                                                                                                                                                                                                                                                                                                                                                                                                                                                                                                                                                                                                                                                                                                                                                                                                                                                                                                                                                                                                                                                                                                                                                                                                                                                                                                                                                                                                                                                                                                                                                                                                                                                                                                                                                                                                                                                                                                                                                                                                                                                                                                                                                                                                                                                                                                                      |   |          |          |          |   |          |          |          |   |          |         |          |   |         |          |          |   |          |         |          |   |          |          |          |   |         |          |          |   |          |         |         |   |          |          |         |   |          |          |         |   |          |         |          |   |          |          |          |   |          |          |         |   |          |          |          |   |          |          |          |   |          |          |         |   |          |          |         |   |          |          |          |   |          |          |          |   |          |          |          |   |          |          |          |   |          |          |          |   |          |          |          |   |          |          |         |   |         |          |          |   |          |         |         |   |          |         |         |   |         |          |          |   |         |          |          |   |         |          |          |   |         |          |          |   |          |          |          |   |         |          |          |   |          |          |          |   |          |          |          |
| H                                                                                                                                                                                                                     | 1.96342                                                                                                                                                                                                                                                                                                                                                                                                                                                                                                                                                                                                                                                                                                                                                                                                                                                                                                                                                                                                                                                                                                                                                                                                                                                                                                                                                                                                                                                                                                                                                                                                                                                                                                                                                                                                                                                                                                                                                                                                                                                                                                                                                                                                                                                                                                                                                                                                                                                                                                                                                              | -0.92329 | 0.01209  |         |          |   |          |         |         |   |          |          |          |   |          |         |          |   |          |         |          |   |          |         |          |   |          |          |          |   |          |         |          |   |          |          |         |   |          |          |         |   |          |         |         |   |          |         |          |   |          |         |          |   |          |          |         |   |          |         |         |   |                                                                                                                                                                                                                                                                                                                                                                                                                                                                                                                                                                                                                                                                                                                                                                                                                                                                                                                                                                                                                                                                                                                            |         |         |          |          |          |         |          |          |          |         |         |          |         |          |          |          |         |          |          |          |         |          |         |          |         |          |         |          |          |          |          |          |          |          |          |          |          |          |         |          |          |          |          |          |          |          |         |          |         |          |         |          |          |          |          |         |          |          |         |         |          |         |   |         |         |          |                                                                                                                                                                                                                       |                                                                                                                                                                                                                                                                                                                                                                                                                                                                                                                                                                                                                                                                                                                                                                                                                                                                                                                                                                                                                                                                                                                                                                                                                                                                                                                                                                                                                                                                                                                                                                                                                                                                                                                                                                                                                                                                                                                                                                                                                                                                                                                                                                                                                                                                                                                                                              |         |          |          |         |          |          |         |         |         |         |                                                                                                                                                                                                                        |                                                                                                                                                                                                                                                                                                                                                                                                                                                                                                                                                                                                                                                                                                                                                                                                                                                                                                                                                                                                                                                                                                                                                                                                                                                                                                                                                                                                                                                                                                                                                                                                                                                                                                                                                                                                                                                                                                                                                                                                                                                                                                                                                                                                                                                                                                                                                                                                                                                                                                                                                                                      |   |          |          |          |   |          |          |          |   |          |         |          |   |         |          |          |   |          |         |          |   |          |          |          |   |         |          |          |   |          |         |         |   |          |          |         |   |          |          |         |   |          |         |          |   |          |          |          |   |          |          |         |   |          |          |          |   |          |          |          |   |          |          |         |   |          |          |         |   |          |          |          |   |          |          |          |   |          |          |          |   |          |          |          |   |          |          |          |   |          |          |          |   |          |          |         |   |         |          |          |   |          |         |         |   |          |         |         |   |         |          |          |   |         |          |          |   |         |          |          |   |         |          |          |   |          |          |          |   |         |          |          |   |          |          |          |   |          |          |          |
| H                                                                                                                                                                                                                     | 3.23677                                                                                                                                                                                                                                                                                                                                                                                                                                                                                                                                                                                                                                                                                                                                                                                                                                                                                                                                                                                                                                                                                                                                                                                                                                                                                                                                                                                                                                                                                                                                                                                                                                                                                                                                                                                                                                                                                                                                                                                                                                                                                                                                                                                                                                                                                                                                                                                                                                                                                                                                                              | 0.07503  | 0.76151  |         |          |   |          |         |         |   |          |          |          |   |          |         |          |   |          |         |          |   |          |         |          |   |          |          |          |   |          |         |          |   |          |          |         |   |          |          |         |   |          |         |         |   |          |         |          |   |          |         |          |   |          |          |         |   |          |         |         |   |                                                                                                                                                                                                                                                                                                                                                                                                                                                                                                                                                                                                                                                                                                                                                                                                                                                                                                                                                                                                                                                                                                                            |         |         |          |          |          |         |          |          |          |         |         |          |         |          |          |          |         |          |          |          |         |          |         |          |         |          |         |          |          |          |          |          |          |          |          |          |          |          |         |          |          |          |          |          |          |          |         |          |         |          |         |          |          |          |          |         |          |          |         |         |          |         |   |         |         |          |                                                                                                                                                                                                                       |                                                                                                                                                                                                                                                                                                                                                                                                                                                                                                                                                                                                                                                                                                                                                                                                                                                                                                                                                                                                                                                                                                                                                                                                                                                                                                                                                                                                                                                                                                                                                                                                                                                                                                                                                                                                                                                                                                                                                                                                                                                                                                                                                                                                                                                                                                                                                              |         |          |          |         |          |          |         |         |         |         |                                                                                                                                                                                                                        |                                                                                                                                                                                                                                                                                                                                                                                                                                                                                                                                                                                                                                                                                                                                                                                                                                                                                                                                                                                                                                                                                                                                                                                                                                                                                                                                                                                                                                                                                                                                                                                                                                                                                                                                                                                                                                                                                                                                                                                                                                                                                                                                                                                                                                                                                                                                                                                                                                                                                                                                                                                      |   |          |          |          |   |          |          |          |   |          |         |          |   |         |          |          |   |          |         |          |   |          |          |          |   |         |          |          |   |          |         |         |   |          |          |         |   |          |          |         |   |          |         |          |   |          |          |          |   |          |          |         |   |          |          |          |   |          |          |          |   |          |          |         |   |          |          |         |   |          |          |          |   |          |          |          |   |          |          |          |   |          |          |          |   |          |          |          |   |          |          |          |   |          |          |         |   |         |          |          |   |          |         |         |   |          |         |         |   |         |          |          |   |         |          |          |   |         |          |          |   |         |          |          |   |          |          |          |   |         |          |          |   |          |          |          |   |          |          |          |
| C                                                                                                                                                                                                                     | 0.05264                                                                                                                                                                                                                                                                                                                                                                                                                                                                                                                                                                                                                                                                                                                                                                                                                                                                                                                                                                                                                                                                                                                                                                                                                                                                                                                                                                                                                                                                                                                                                                                                                                                                                                                                                                                                                                                                                                                                                                                                                                                                                                                                                                                                                                                                                                                                                                                                                                                                                                                                                              | 2.34917  | -2.69108 |         |          |   |          |         |         |   |          |          |          |   |          |         |          |   |          |         |          |   |          |         |          |   |          |          |          |   |          |         |          |   |          |          |         |   |          |          |         |   |          |         |         |   |          |         |          |   |          |         |          |   |          |          |         |   |          |         |         |   |                                                                                                                                                                                                                                                                                                                                                                                                                                                                                                                                                                                                                                                                                                                                                                                                                                                                                                                                                                                                                                                                                                                            |         |         |          |          |          |         |          |          |          |         |         |          |         |          |          |          |         |          |          |          |         |          |         |          |         |          |         |          |          |          |          |          |          |          |          |          |          |          |         |          |          |          |          |          |          |          |         |          |         |          |         |          |          |          |          |         |          |          |         |         |          |         |   |         |         |          |                                                                                                                                                                                                                       |                                                                                                                                                                                                                                                                                                                                                                                                                                                                                                                                                                                                                                                                                                                                                                                                                                                                                                                                                                                                                                                                                                                                                                                                                                                                                                                                                                                                                                                                                                                                                                                                                                                                                                                                                                                                                                                                                                                                                                                                                                                                                                                                                                                                                                                                                                                                                              |         |          |          |         |          |          |         |         |         |         |                                                                                                                                                                                                                        |                                                                                                                                                                                                                                                                                                                                                                                                                                                                                                                                                                                                                                                                                                                                                                                                                                                                                                                                                                                                                                                                                                                                                                                                                                                                                                                                                                                                                                                                                                                                                                                                                                                                                                                                                                                                                                                                                                                                                                                                                                                                                                                                                                                                                                                                                                                                                                                                                                                                                                                                                                                      |   |          |          |          |   |          |          |          |   |          |         |          |   |         |          |          |   |          |         |          |   |          |          |          |   |         |          |          |   |          |         |         |   |          |          |         |   |          |          |         |   |          |         |          |   |          |          |          |   |          |          |         |   |          |          |          |   |          |          |          |   |          |          |         |   |          |          |         |   |          |          |          |   |          |          |          |   |          |          |          |   |          |          |          |   |          |          |          |   |          |          |          |   |          |          |         |   |         |          |          |   |          |         |         |   |          |         |         |   |         |          |          |   |         |          |          |   |         |          |          |   |         |          |          |   |          |          |          |   |         |          |          |   |          |          |          |   |          |          |          |
| C                                                                                                                                                                                                                     | -0.06249                                                                                                                                                                                                                                                                                                                                                                                                                                                                                                                                                                                                                                                                                                                                                                                                                                                                                                                                                                                                                                                                                                                                                                                                                                                                                                                                                                                                                                                                                                                                                                                                                                                                                                                                                                                                                                                                                                                                                                                                                                                                                                                                                                                                                                                                                                                                                                                                                                                                                                                                                             | 0.51954  | -0.48514 |         |          |   |          |         |         |   |          |          |          |   |          |         |          |   |          |         |          |   |          |         |          |   |          |          |          |   |          |         |          |   |          |          |         |   |          |          |         |   |          |         |         |   |          |         |          |   |          |         |          |   |          |          |         |   |          |         |         |   |                                                                                                                                                                                                                                                                                                                                                                                                                                                                                                                                                                                                                                                                                                                                                                                                                                                                                                                                                                                                                                                                                                                            |         |         |          |          |          |         |          |          |          |         |         |          |         |          |          |          |         |          |          |          |         |          |         |          |         |          |         |          |          |          |          |          |          |          |          |          |          |          |         |          |          |          |          |          |          |          |         |          |         |          |         |          |          |          |          |         |          |          |         |         |          |         |   |         |         |          |                                                                                                                                                                                                                       |                                                                                                                                                                                                                                                                                                                                                                                                                                                                                                                                                                                                                                                                                                                                                                                                                                                                                                                                                                                                                                                                                                                                                                                                                                                                                                                                                                                                                                                                                                                                                                                                                                                                                                                                                                                                                                                                                                                                                                                                                                                                                                                                                                                                                                                                                                                                                              |         |          |          |         |          |          |         |         |         |         |                                                                                                                                                                                                                        |                                                                                                                                                                                                                                                                                                                                                                                                                                                                                                                                                                                                                                                                                                                                                                                                                                                                                                                                                                                                                                                                                                                                                                                                                                                                                                                                                                                                                                                                                                                                                                                                                                                                                                                                                                                                                                                                                                                                                                                                                                                                                                                                                                                                                                                                                                                                                                                                                                                                                                                                                                                      |   |          |          |          |   |          |          |          |   |          |         |          |   |         |          |          |   |          |         |          |   |          |          |          |   |         |          |          |   |          |         |         |   |          |          |         |   |          |          |         |   |          |         |          |   |          |          |          |   |          |          |         |   |          |          |          |   |          |          |          |   |          |          |         |   |          |          |         |   |          |          |          |   |          |          |          |   |          |          |          |   |          |          |          |   |          |          |          |   |          |          |          |   |          |          |         |   |         |          |          |   |          |         |         |   |          |         |         |   |         |          |          |   |         |          |          |   |         |          |          |   |         |          |          |   |          |          |          |   |         |          |          |   |          |          |          |   |          |          |          |
| C                                                                                                                                                                                                                     | -0.00050                                                                                                                                                                                                                                                                                                                                                                                                                                                                                                                                                                                                                                                                                                                                                                                                                                                                                                                                                                                                                                                                                                                                                                                                                                                                                                                                                                                                                                                                                                                                                                                                                                                                                                                                                                                                                                                                                                                                                                                                                                                                                                                                                                                                                                                                                                                                                                                                                                                                                                                                                             | 0.97825  | -2.88278 |         |          |   |          |         |         |   |          |          |          |   |          |         |          |   |          |         |          |   |          |         |          |   |          |          |          |   |          |         |          |   |          |          |         |   |          |          |         |   |          |         |         |   |          |         |          |   |          |         |          |   |          |          |         |   |          |         |         |   |                                                                                                                                                                                                                                                                                                                                                                                                                                                                                                                                                                                                                                                                                                                                                                                                                                                                                                                                                                                                                                                                                                                            |         |         |          |          |          |         |          |          |          |         |         |          |         |          |          |          |         |          |          |          |         |          |         |          |         |          |         |          |          |          |          |          |          |          |          |          |          |          |         |          |          |          |          |          |          |          |         |          |         |          |         |          |          |          |          |         |          |          |         |         |          |         |   |         |         |          |                                                                                                                                                                                                                       |                                                                                                                                                                                                                                                                                                                                                                                                                                                                                                                                                                                                                                                                                                                                                                                                                                                                                                                                                                                                                                                                                                                                                                                                                                                                                                                                                                                                                                                                                                                                                                                                                                                                                                                                                                                                                                                                                                                                                                                                                                                                                                                                                                                                                                                                                                                                                              |         |          |          |         |          |          |         |         |         |         |                                                                                                                                                                                                                        |                                                                                                                                                                                                                                                                                                                                                                                                                                                                                                                                                                                                                                                                                                                                                                                                                                                                                                                                                                                                                                                                                                                                                                                                                                                                                                                                                                                                                                                                                                                                                                                                                                                                                                                                                                                                                                                                                                                                                                                                                                                                                                                                                                                                                                                                                                                                                                                                                                                                                                                                                                                      |   |          |          |          |   |          |          |          |   |          |         |          |   |         |          |          |   |          |         |          |   |          |          |          |   |         |          |          |   |          |         |         |   |          |          |         |   |          |          |         |   |          |         |          |   |          |          |          |   |          |          |         |   |          |          |          |   |          |          |          |   |          |          |         |   |          |          |         |   |          |          |          |   |          |          |          |   |          |          |          |   |          |          |          |   |          |          |          |   |          |          |          |   |          |          |         |   |         |          |          |   |          |         |         |   |          |         |         |   |         |          |          |   |         |          |          |   |         |          |          |   |         |          |          |   |          |          |          |   |         |          |          |   |          |          |          |   |          |          |          |
| C                                                                                                                                                                                                                     | 0.01920                                                                                                                                                                                                                                                                                                                                                                                                                                                                                                                                                                                                                                                                                                                                                                                                                                                                                                                                                                                                                                                                                                                                                                                                                                                                                                                                                                                                                                                                                                                                                                                                                                                                                                                                                                                                                                                                                                                                                                                                                                                                                                                                                                                                                                                                                                                                                                                                                                                                                                                                                              | 2.82235  | -1.39488 |         |          |   |          |         |         |   |          |          |          |   |          |         |          |   |          |         |          |   |          |         |          |   |          |          |          |   |          |         |          |   |          |          |         |   |          |          |         |   |          |         |         |   |          |         |          |   |          |         |          |   |          |          |         |   |          |         |         |   |                                                                                                                                                                                                                                                                                                                                                                                                                                                                                                                                                                                                                                                                                                                                                                                                                                                                                                                                                                                                                                                                                                                            |         |         |          |          |          |         |          |          |          |         |         |          |         |          |          |          |         |          |          |          |         |          |         |          |         |          |         |          |          |          |          |          |          |          |          |          |          |          |         |          |          |          |          |          |          |          |         |          |         |          |         |          |          |          |          |         |          |          |         |         |          |         |   |         |         |          |                                                                                                                                                                                                                       |                                                                                                                                                                                                                                                                                                                                                                                                                                                                                                                                                                                                                                                                                                                                                                                                                                                                                                                                                                                                                                                                                                                                                                                                                                                                                                                                                                                                                                                                                                                                                                                                                                                                                                                                                                                                                                                                                                                                                                                                                                                                                                                                                                                                                                                                                                                                                              |         |          |          |         |          |          |         |         |         |         |                                                                                                                                                                                                                        |                                                                                                                                                                                                                                                                                                                                                                                                                                                                                                                                                                                                                                                                                                                                                                                                                                                                                                                                                                                                                                                                                                                                                                                                                                                                                                                                                                                                                                                                                                                                                                                                                                                                                                                                                                                                                                                                                                                                                                                                                                                                                                                                                                                                                                                                                                                                                                                                                                                                                                                                                                                      |   |          |          |          |   |          |          |          |   |          |         |          |   |         |          |          |   |          |         |          |   |          |          |          |   |         |          |          |   |          |         |         |   |          |          |         |   |          |          |         |   |          |         |          |   |          |          |          |   |          |          |         |   |          |          |          |   |          |          |          |   |          |          |         |   |          |          |         |   |          |          |          |   |          |          |          |   |          |          |          |   |          |          |          |   |          |          |          |   |          |          |          |   |          |          |         |   |         |          |          |   |          |         |         |   |          |         |         |   |         |          |          |   |         |          |          |   |         |          |          |   |         |          |          |   |          |          |          |   |         |          |          |   |          |          |          |   |          |          |          |
| C                                                                                                                                                                                                                     | -0.03755                                                                                                                                                                                                                                                                                                                                                                                                                                                                                                                                                                                                                                                                                                                                                                                                                                                                                                                                                                                                                                                                                                                                                                                                                                                                                                                                                                                                                                                                                                                                                                                                                                                                                                                                                                                                                                                                                                                                                                                                                                                                                                                                                                                                                                                                                                                                                                                                                                                                                                                                                             | 1.92440  | -0.34137 |         |          |   |          |         |         |   |          |          |          |   |          |         |          |   |          |         |          |   |          |         |          |   |          |          |          |   |          |         |          |   |          |          |         |   |          |          |         |   |          |         |         |   |          |         |          |   |          |         |          |   |          |          |         |   |          |         |         |   |                                                                                                                                                                                                                                                                                                                                                                                                                                                                                                                                                                                                                                                                                                                                                                                                                                                                                                                                                                                                                                                                                                                            |         |         |          |          |          |         |          |          |          |         |         |          |         |          |          |          |         |          |          |          |         |          |         |          |         |          |         |          |          |          |          |          |          |          |          |          |          |          |         |          |          |          |          |          |          |          |         |          |         |          |         |          |          |          |          |         |          |          |         |         |          |         |   |         |         |          |                                                                                                                                                                                                                       |                                                                                                                                                                                                                                                                                                                                                                                                                                                                                                                                                                                                                                                                                                                                                                                                                                                                                                                                                                                                                                                                                                                                                                                                                                                                                                                                                                                                                                                                                                                                                                                                                                                                                                                                                                                                                                                                                                                                                                                                                                                                                                                                                                                                                                                                                                                                                              |         |          |          |         |          |          |         |         |         |         |                                                                                                                                                                                                                        |                                                                                                                                                                                                                                                                                                                                                                                                                                                                                                                                                                                                                                                                                                                                                                                                                                                                                                                                                                                                                                                                                                                                                                                                                                                                                                                                                                                                                                                                                                                                                                                                                                                                                                                                                                                                                                                                                                                                                                                                                                                                                                                                                                                                                                                                                                                                                                                                                                                                                                                                                                                      |   |          |          |          |   |          |          |          |   |          |         |          |   |         |          |          |   |          |         |          |   |          |          |          |   |         |          |          |   |          |         |         |   |          |          |         |   |          |          |         |   |          |         |          |   |          |          |          |   |          |          |         |   |          |          |          |   |          |          |          |   |          |          |         |   |          |          |         |   |          |          |          |   |          |          |          |   |          |          |          |   |          |          |          |   |          |          |          |   |          |          |          |   |          |          |         |   |         |          |          |   |          |         |         |   |          |         |         |   |         |          |          |   |         |          |          |   |         |          |          |   |         |          |          |   |          |          |          |   |         |          |          |   |          |          |          |   |          |          |          |
| C                                                                                                                                                                                                                     | -0.07091                                                                                                                                                                                                                                                                                                                                                                                                                                                                                                                                                                                                                                                                                                                                                                                                                                                                                                                                                                                                                                                                                                                                                                                                                                                                                                                                                                                                                                                                                                                                                                                                                                                                                                                                                                                                                                                                                                                                                                                                                                                                                                                                                                                                                                                                                                                                                                                                                                                                                                                                                             | 0.04246  | -1.84499 |         |          |   |          |         |         |   |          |          |          |   |          |         |          |   |          |         |          |   |          |         |          |   |          |          |          |   |          |         |          |   |          |          |         |   |          |          |         |   |          |         |         |   |          |         |          |   |          |         |          |   |          |          |         |   |          |         |         |   |                                                                                                                                                                                                                                                                                                                                                                                                                                                                                                                                                                                                                                                                                                                                                                                                                                                                                                                                                                                                                                                                                                                            |         |         |          |          |          |         |          |          |          |         |         |          |         |          |          |          |         |          |          |          |         |          |         |          |         |          |         |          |          |          |          |          |          |          |          |          |          |          |         |          |          |          |          |          |          |          |         |          |         |          |         |          |          |          |          |         |          |          |         |         |          |         |   |         |         |          |                                                                                                                                                                                                                       |                                                                                                                                                                                                                                                                                                                                                                                                                                                                                                                                                                                                                                                                                                                                                                                                                                                                                                                                                                                                                                                                                                                                                                                                                                                                                                                                                                                                                                                                                                                                                                                                                                                                                                                                                                                                                                                                                                                                                                                                                                                                                                                                                                                                                                                                                                                                                              |         |          |          |         |          |          |         |         |         |         |                                                                                                                                                                                                                        |                                                                                                                                                                                                                                                                                                                                                                                                                                                                                                                                                                                                                                                                                                                                                                                                                                                                                                                                                                                                                                                                                                                                                                                                                                                                                                                                                                                                                                                                                                                                                                                                                                                                                                                                                                                                                                                                                                                                                                                                                                                                                                                                                                                                                                                                                                                                                                                                                                                                                                                                                                                      |   |          |          |          |   |          |          |          |   |          |         |          |   |         |          |          |   |          |         |          |   |          |          |          |   |         |          |          |   |          |         |         |   |          |          |         |   |          |          |         |   |          |         |          |   |          |          |          |   |          |          |         |   |          |          |          |   |          |          |          |   |          |          |         |   |          |          |         |   |          |          |          |   |          |          |          |   |          |          |          |   |          |          |          |   |          |          |          |   |          |          |          |   |          |          |         |   |         |          |          |   |          |         |         |   |          |         |         |   |         |          |          |   |         |          |          |   |         |          |          |   |         |          |          |   |          |          |          |   |         |          |          |   |          |          |          |   |          |          |          |
| H                                                                                                                                                                                                                     | 0.00690                                                                                                                                                                                                                                                                                                                                                                                                                                                                                                                                                                                                                                                                                                                                                                                                                                                                                                                                                                                                                                                                                                                                                                                                                                                                                                                                                                                                                                                                                                                                                                                                                                                                                                                                                                                                                                                                                                                                                                                                                                                                                                                                                                                                                                                                                                                                                                                                                                                                                                                                                              | 0.62195  | -3.90035 |         |          |   |          |         |         |   |          |          |          |   |          |         |          |   |          |         |          |   |          |         |          |   |          |          |          |   |          |         |          |   |          |          |         |   |          |          |         |   |          |         |         |   |          |         |          |   |          |         |          |   |          |          |         |   |          |         |         |   |                                                                                                                                                                                                                                                                                                                                                                                                                                                                                                                                                                                                                                                                                                                                                                                                                                                                                                                                                                                                                                                                                                                            |         |         |          |          |          |         |          |          |          |         |         |          |         |          |          |          |         |          |          |          |         |          |         |          |         |          |         |          |          |          |          |          |          |          |          |          |          |          |         |          |          |          |          |          |          |          |         |          |         |          |         |          |          |          |          |         |          |          |         |         |          |         |   |         |         |          |                                                                                                                                                                                                                       |                                                                                                                                                                                                                                                                                                                                                                                                                                                                                                                                                                                                                                                                                                                                                                                                                                                                                                                                                                                                                                                                                                                                                                                                                                                                                                                                                                                                                                                                                                                                                                                                                                                                                                                                                                                                                                                                                                                                                                                                                                                                                                                                                                                                                                                                                                                                                              |         |          |          |         |          |          |         |         |         |         |                                                                                                                                                                                                                        |                                                                                                                                                                                                                                                                                                                                                                                                                                                                                                                                                                                                                                                                                                                                                                                                                                                                                                                                                                                                                                                                                                                                                                                                                                                                                                                                                                                                                                                                                                                                                                                                                                                                                                                                                                                                                                                                                                                                                                                                                                                                                                                                                                                                                                                                                                                                                                                                                                                                                                                                                                                      |   |          |          |          |   |          |          |          |   |          |         |          |   |         |          |          |   |          |         |          |   |          |          |          |   |         |          |          |   |          |         |         |   |          |          |         |   |          |          |         |   |          |         |          |   |          |          |          |   |          |          |         |   |          |          |          |   |          |          |          |   |          |          |         |   |          |          |         |   |          |          |          |   |          |          |          |   |          |          |          |   |          |          |          |   |          |          |          |   |          |          |          |   |          |          |         |   |         |          |          |   |          |         |         |   |          |         |         |   |         |          |          |   |         |          |          |   |         |          |          |   |         |          |          |   |          |          |          |   |         |          |          |   |          |          |          |   |          |          |          |
| H                                                                                                                                                                                                                     | -0.06094                                                                                                                                                                                                                                                                                                                                                                                                                                                                                                                                                                                                                                                                                                                                                                                                                                                                                                                                                                                                                                                                                                                                                                                                                                                                                                                                                                                                                                                                                                                                                                                                                                                                                                                                                                                                                                                                                                                                                                                                                                                                                                                                                                                                                                                                                                                                                                                                                                                                                                                                                             | 2.34079  | 0.64246  |         |          |   |          |         |         |   |          |          |          |   |          |         |          |   |          |         |          |   |          |         |          |   |          |          |          |   |          |         |          |   |          |          |         |   |          |          |         |   |          |         |         |   |          |         |          |   |          |         |          |   |          |          |         |   |          |         |         |   |                                                                                                                                                                                                                                                                                                                                                                                                                                                                                                                                                                                                                                                                                                                                                                                                                                                                                                                                                                                                                                                                                                                            |         |         |          |          |          |         |          |          |          |         |         |          |         |          |          |          |         |          |          |          |         |          |         |          |         |          |         |          |          |          |          |          |          |          |          |          |          |          |         |          |          |          |          |          |          |          |         |          |         |          |         |          |          |          |          |         |          |          |         |         |          |         |   |         |         |          |                                                                                                                                                                                                                       |                                                                                                                                                                                                                                                                                                                                                                                                                                                                                                                                                                                                                                                                                                                                                                                                                                                                                                                                                                                                                                                                                                                                                                                                                                                                                                                                                                                                                                                                                                                                                                                                                                                                                                                                                                                                                                                                                                                                                                                                                                                                                                                                                                                                                                                                                                                                                              |         |          |          |         |          |          |         |         |         |         |                                                                                                                                                                                                                        |                                                                                                                                                                                                                                                                                                                                                                                                                                                                                                                                                                                                                                                                                                                                                                                                                                                                                                                                                                                                                                                                                                                                                                                                                                                                                                                                                                                                                                                                                                                                                                                                                                                                                                                                                                                                                                                                                                                                                                                                                                                                                                                                                                                                                                                                                                                                                                                                                                                                                                                                                                                      |   |          |          |          |   |          |          |          |   |          |         |          |   |         |          |          |   |          |         |          |   |          |          |          |   |         |          |          |   |          |         |         |   |          |          |         |   |          |          |         |   |          |         |          |   |          |          |          |   |          |          |         |   |          |          |          |   |          |          |          |   |          |          |         |   |          |          |         |   |          |          |          |   |          |          |          |   |          |          |          |   |          |          |          |   |          |          |          |   |          |          |          |   |          |          |         |   |         |          |          |   |          |         |         |   |          |         |         |   |         |          |          |   |         |          |          |   |         |          |          |   |         |          |          |   |          |          |          |   |         |          |          |   |          |          |          |   |          |          |          |
| C                                                                                                                                                                                                                     | -0.08379                                                                                                                                                                                                                                                                                                                                                                                                                                                                                                                                                                                                                                                                                                                                                                                                                                                                                                                                                                                                                                                                                                                                                                                                                                                                                                                                                                                                                                                                                                                                                                                                                                                                                                                                                                                                                                                                                                                                                                                                                                                                                                                                                                                                                                                                                                                                                                                                                                                                                                                                                             | -0.32346 | 0.77618  |         |          |   |          |         |         |   |          |          |          |   |          |         |          |   |          |         |          |   |          |         |          |   |          |          |          |   |          |         |          |   |          |          |         |   |          |          |         |   |          |         |         |   |          |         |          |   |          |         |          |   |          |          |         |   |          |         |         |   |                                                                                                                                                                                                                                                                                                                                                                                                                                                                                                                                                                                                                                                                                                                                                                                                                                                                                                                                                                                                                                                                                                                            |         |         |          |          |          |         |          |          |          |         |         |          |         |          |          |          |         |          |          |          |         |          |         |          |         |          |         |          |          |          |          |          |          |          |          |          |          |          |         |          |          |          |          |          |          |          |         |          |         |          |         |          |          |          |          |         |          |          |         |         |          |         |   |         |         |          |                                                                                                                                                                                                                       |                                                                                                                                                                                                                                                                                                                                                                                                                                                                                                                                                                                                                                                                                                                                                                                                                                                                                                                                                                                                                                                                                                                                                                                                                                                                                                                                                                                                                                                                                                                                                                                                                                                                                                                                                                                                                                                                                                                                                                                                                                                                                                                                                                                                                                                                                                                                                              |         |          |          |         |          |          |         |         |         |         |                                                                                                                                                                                                                        |                                                                                                                                                                                                                                                                                                                                                                                                                                                                                                                                                                                                                                                                                                                                                                                                                                                                                                                                                                                                                                                                                                                                                                                                                                                                                                                                                                                                                                                                                                                                                                                                                                                                                                                                                                                                                                                                                                                                                                                                                                                                                                                                                                                                                                                                                                                                                                                                                                                                                                                                                                                      |   |          |          |          |   |          |          |          |   |          |         |          |   |         |          |          |   |          |         |          |   |          |          |          |   |         |          |          |   |          |         |         |   |          |          |         |   |          |          |         |   |          |         |          |   |          |          |          |   |          |          |         |   |          |          |          |   |          |          |          |   |          |          |         |   |          |          |         |   |          |          |          |   |          |          |          |   |          |          |          |   |          |          |          |   |          |          |          |   |          |          |          |   |          |          |         |   |         |          |          |   |          |         |         |   |          |         |         |   |         |          |          |   |         |          |          |   |         |          |          |   |         |          |          |   |          |          |          |   |         |          |          |   |          |          |          |   |          |          |          |
| C                                                                                                                                                                                                                     | -0.15013                                                                                                                                                                                                                                                                                                                                                                                                                                                                                                                                                                                                                                                                                                                                                                                                                                                                                                                                                                                                                                                                                                                                                                                                                                                                                                                                                                                                                                                                                                                                                                                                                                                                                                                                                                                                                                                                                                                                                                                                                                                                                                                                                                                                                                                                                                                                                                                                                                                                                                                                                             | -2.03841 | 3.09878  |         |          |   |          |         |         |   |          |          |          |   |          |         |          |   |          |         |          |   |          |         |          |   |          |          |          |   |          |         |          |   |          |          |         |   |          |          |         |   |          |         |         |   |          |         |          |   |          |         |          |   |          |          |         |   |          |         |         |   |                                                                                                                                                                                                                                                                                                                                                                                                                                                                                                                                                                                                                                                                                                                                                                                                                                                                                                                                                                                                                                                                                                                            |         |         |          |          |          |         |          |          |          |         |         |          |         |          |          |          |         |          |          |          |         |          |         |          |         |          |         |          |          |          |          |          |          |          |          |          |          |          |         |          |          |          |          |          |          |          |         |          |         |          |         |          |          |          |          |         |          |          |         |         |          |         |   |         |         |          |                                                                                                                                                                                                                       |                                                                                                                                                                                                                                                                                                                                                                                                                                                                                                                                                                                                                                                                                                                                                                                                                                                                                                                                                                                                                                                                                                                                                                                                                                                                                                                                                                                                                                                                                                                                                                                                                                                                                                                                                                                                                                                                                                                                                                                                                                                                                                                                                                                                                                                                                                                                                              |         |          |          |         |          |          |         |         |         |         |                                                                                                                                                                                                                        |                                                                                                                                                                                                                                                                                                                                                                                                                                                                                                                                                                                                                                                                                                                                                                                                                                                                                                                                                                                                                                                                                                                                                                                                                                                                                                                                                                                                                                                                                                                                                                                                                                                                                                                                                                                                                                                                                                                                                                                                                                                                                                                                                                                                                                                                                                                                                                                                                                                                                                                                                                                      |   |          |          |          |   |          |          |          |   |          |         |          |   |         |          |          |   |          |         |          |   |          |          |          |   |         |          |          |   |          |         |         |   |          |          |         |   |          |          |         |   |          |         |          |   |          |          |          |   |          |          |         |   |          |          |          |   |          |          |          |   |          |          |         |   |          |          |         |   |          |          |          |   |          |          |          |   |          |          |          |   |          |          |          |   |          |          |          |   |          |          |          |   |          |          |         |   |         |          |          |   |          |         |         |   |          |         |         |   |         |          |          |   |         |          |          |   |         |          |          |   |         |          |          |   |          |          |          |   |         |          |          |   |          |          |          |   |          |          |          |
| C                                                                                                                                                                                                                     | -0.04513                                                                                                                                                                                                                                                                                                                                                                                                                                                                                                                                                                                                                                                                                                                                                                                                                                                                                                                                                                                                                                                                                                                                                                                                                                                                                                                                                                                                                                                                                                                                                                                                                                                                                                                                                                                                                                                                                                                                                                                                                                                                                                                                                                                                                                                                                                                                                                                                                                                                                                                                                             | 0.18949  | 2.12032  |         |          |   |          |         |         |   |          |          |          |   |          |         |          |   |          |         |          |   |          |         |          |   |          |          |          |   |          |         |          |   |          |          |         |   |          |          |         |   |          |         |         |   |          |         |          |   |          |         |          |   |          |          |         |   |          |         |         |   |                                                                                                                                                                                                                                                                                                                                                                                                                                                                                                                                                                                                                                                                                                                                                                                                                                                                                                                                                                                                                                                                                                                            |         |         |          |          |          |         |          |          |          |         |         |          |         |          |          |          |         |          |          |          |         |          |         |          |         |          |         |          |          |          |          |          |          |          |          |          |          |          |         |          |          |          |          |          |          |          |         |          |         |          |         |          |          |          |          |         |          |          |         |         |          |         |   |         |         |          |                                                                                                                                                                                                                       |                                                                                                                                                                                                                                                                                                                                                                                                                                                                                                                                                                                                                                                                                                                                                                                                                                                                                                                                                                                                                                                                                                                                                                                                                                                                                                                                                                                                                                                                                                                                                                                                                                                                                                                                                                                                                                                                                                                                                                                                                                                                                                                                                                                                                                                                                                                                                              |         |          |          |         |          |          |         |         |         |         |                                                                                                                                                                                                                        |                                                                                                                                                                                                                                                                                                                                                                                                                                                                                                                                                                                                                                                                                                                                                                                                                                                                                                                                                                                                                                                                                                                                                                                                                                                                                                                                                                                                                                                                                                                                                                                                                                                                                                                                                                                                                                                                                                                                                                                                                                                                                                                                                                                                                                                                                                                                                                                                                                                                                                                                                                                      |   |          |          |          |   |          |          |          |   |          |         |          |   |         |          |          |   |          |         |          |   |          |          |          |   |         |          |          |   |          |         |         |   |          |          |         |   |          |          |         |   |          |         |          |   |          |          |          |   |          |          |         |   |          |          |          |   |          |          |          |   |          |          |         |   |          |          |         |   |          |          |          |   |          |          |          |   |          |          |          |   |          |          |          |   |          |          |          |   |          |          |          |   |          |          |         |   |         |          |          |   |          |         |         |   |          |         |         |   |         |          |          |   |         |          |          |   |         |          |          |   |         |          |          |   |          |          |          |   |         |          |          |   |          |          |          |   |          |          |          |
| C                                                                                                                                                                                                                     | -0.13310                                                                                                                                                                                                                                                                                                                                                                                                                                                                                                                                                                                                                                                                                                                                                                                                                                                                                                                                                                                                                                                                                                                                                                                                                                                                                                                                                                                                                                                                                                                                                                                                                                                                                                                                                                                                                                                                                                                                                                                                                                                                                                                                                                                                                                                                                                                                                                                                                                                                                                                                                             | -1.72838 | 0.72674  |         |          |   |          |         |         |   |          |          |          |   |          |         |          |   |          |         |          |   |          |         |          |   |          |          |          |   |          |         |          |   |          |          |         |   |          |          |         |   |          |         |         |   |          |         |          |   |          |         |          |   |          |          |         |   |          |         |         |   |                                                                                                                                                                                                                                                                                                                                                                                                                                                                                                                                                                                                                                                                                                                                                                                                                                                                                                                                                                                                                                                                                                                            |         |         |          |          |          |         |          |          |          |         |         |          |         |          |          |          |         |          |          |          |         |          |         |          |         |          |         |          |          |          |          |          |          |          |          |          |          |          |         |          |          |          |          |          |          |          |         |          |         |          |         |          |          |          |          |         |          |          |         |         |          |         |   |         |         |          |                                                                                                                                                                                                                       |                                                                                                                                                                                                                                                                                                                                                                                                                                                                                                                                                                                                                                                                                                                                                                                                                                                                                                                                                                                                                                                                                                                                                                                                                                                                                                                                                                                                                                                                                                                                                                                                                                                                                                                                                                                                                                                                                                                                                                                                                                                                                                                                                                                                                                                                                                                                                              |         |          |          |         |          |          |         |         |         |         |                                                                                                                                                                                                                        |                                                                                                                                                                                                                                                                                                                                                                                                                                                                                                                                                                                                                                                                                                                                                                                                                                                                                                                                                                                                                                                                                                                                                                                                                                                                                                                                                                                                                                                                                                                                                                                                                                                                                                                                                                                                                                                                                                                                                                                                                                                                                                                                                                                                                                                                                                                                                                                                                                                                                                                                                                                      |   |          |          |          |   |          |          |          |   |          |         |          |   |         |          |          |   |          |         |          |   |          |          |          |   |         |          |          |   |          |         |         |   |          |          |         |   |          |          |         |   |          |         |          |   |          |          |          |   |          |          |         |   |          |          |          |   |          |          |          |   |          |          |         |   |          |          |         |   |          |          |          |   |          |          |          |   |          |          |          |   |          |          |          |   |          |          |          |   |          |          |          |   |          |          |         |   |         |          |          |   |          |         |         |   |          |         |         |   |         |          |          |   |         |          |          |   |         |          |          |   |         |          |          |   |          |          |          |   |         |          |          |   |          |          |          |   |          |          |          |
| C                                                                                                                                                                                                                     | -0.16948                                                                                                                                                                                                                                                                                                                                                                                                                                                                                                                                                                                                                                                                                                                                                                                                                                                                                                                                                                                                                                                                                                                                                                                                                                                                                                                                                                                                                                                                                                                                                                                                                                                                                                                                                                                                                                                                                                                                                                                                                                                                                                                                                                                                                                                                                                                                                                                                                                                                                                                                                             | -2.57426 | 1.82680  |         |          |   |          |         |         |   |          |          |          |   |          |         |          |   |          |         |          |   |          |         |          |   |          |          |          |   |          |         |          |   |          |          |         |   |          |          |         |   |          |         |         |   |          |         |          |   |          |         |          |   |          |          |         |   |          |         |         |   |                                                                                                                                                                                                                                                                                                                                                                                                                                                                                                                                                                                                                                                                                                                                                                                                                                                                                                                                                                                                                                                                                                                            |         |         |          |          |          |         |          |          |          |         |         |          |         |          |          |          |         |          |          |          |         |          |         |          |         |          |         |          |          |          |          |          |          |          |          |          |          |          |         |          |          |          |          |          |          |          |         |          |         |          |         |          |          |          |          |         |          |          |         |         |          |         |   |         |         |          |                                                                                                                                                                                                                       |                                                                                                                                                                                                                                                                                                                                                                                                                                                                                                                                                                                                                                                                                                                                                                                                                                                                                                                                                                                                                                                                                                                                                                                                                                                                                                                                                                                                                                                                                                                                                                                                                                                                                                                                                                                                                                                                                                                                                                                                                                                                                                                                                                                                                                                                                                                                                              |         |          |          |         |          |          |         |         |         |         |                                                                                                                                                                                                                        |                                                                                                                                                                                                                                                                                                                                                                                                                                                                                                                                                                                                                                                                                                                                                                                                                                                                                                                                                                                                                                                                                                                                                                                                                                                                                                                                                                                                                                                                                                                                                                                                                                                                                                                                                                                                                                                                                                                                                                                                                                                                                                                                                                                                                                                                                                                                                                                                                                                                                                                                                                                      |   |          |          |          |   |          |          |          |   |          |         |          |   |         |          |          |   |          |         |          |   |          |          |          |   |         |          |          |   |          |         |         |   |          |          |         |   |          |          |         |   |          |         |          |   |          |          |          |   |          |          |         |   |          |          |          |   |          |          |          |   |          |          |         |   |          |          |         |   |          |          |          |   |          |          |          |   |          |          |          |   |          |          |          |   |          |          |          |   |          |          |          |   |          |          |         |   |         |          |          |   |          |         |         |   |          |         |         |   |         |          |          |   |         |          |          |   |         |          |          |   |         |          |          |   |          |          |          |   |         |          |          |   |          |          |          |   |          |          |          |
| C                                                                                                                                                                                                                     | -0.08462                                                                                                                                                                                                                                                                                                                                                                                                                                                                                                                                                                                                                                                                                                                                                                                                                                                                                                                                                                                                                                                                                                                                                                                                                                                                                                                                                                                                                                                                                                                                                                                                                                                                                                                                                                                                                                                                                                                                                                                                                                                                                                                                                                                                                                                                                                                                                                                                                                                                                                                                                             | -0.66076 | 3.22895  |         |          |   |          |         |         |   |          |          |          |   |          |         |          |   |          |         |          |   |          |         |          |   |          |          |          |   |          |         |          |   |          |          |         |   |          |          |         |   |          |         |         |   |          |         |          |   |          |         |          |   |          |          |         |   |          |         |         |   |                                                                                                                                                                                                                                                                                                                                                                                                                                                                                                                                                                                                                                                                                                                                                                                                                                                                                                                                                                                                                                                                                                                            |         |         |          |          |          |         |          |          |          |         |         |          |         |          |          |          |         |          |          |          |         |          |         |          |         |          |         |          |          |          |          |          |          |          |          |          |          |          |         |          |          |          |          |          |          |          |         |          |         |          |         |          |          |          |          |         |          |          |         |         |          |         |   |         |         |          |                                                                                                                                                                                                                       |                                                                                                                                                                                                                                                                                                                                                                                                                                                                                                                                                                                                                                                                                                                                                                                                                                                                                                                                                                                                                                                                                                                                                                                                                                                                                                                                                                                                                                                                                                                                                                                                                                                                                                                                                                                                                                                                                                                                                                                                                                                                                                                                                                                                                                                                                                                                                              |         |          |          |         |          |          |         |         |         |         |                                                                                                                                                                                                                        |                                                                                                                                                                                                                                                                                                                                                                                                                                                                                                                                                                                                                                                                                                                                                                                                                                                                                                                                                                                                                                                                                                                                                                                                                                                                                                                                                                                                                                                                                                                                                                                                                                                                                                                                                                                                                                                                                                                                                                                                                                                                                                                                                                                                                                                                                                                                                                                                                                                                                                                                                                                      |   |          |          |          |   |          |          |          |   |          |         |          |   |         |          |          |   |          |         |          |   |          |          |          |   |         |          |          |   |          |         |         |   |          |          |         |   |          |          |         |   |          |         |          |   |          |          |          |   |          |          |         |   |          |          |          |   |          |          |          |   |          |          |         |   |          |          |         |   |          |          |          |   |          |          |          |   |          |          |          |   |          |          |          |   |          |          |          |   |          |          |          |   |          |          |         |   |         |          |          |   |          |         |         |   |          |         |         |   |         |          |          |   |         |          |          |   |         |          |          |   |         |          |          |   |          |          |          |   |         |          |          |   |          |          |          |   |          |          |          |
| H                                                                                                                                                                                                                     | -0.13801                                                                                                                                                                                                                                                                                                                                                                                                                                                                                                                                                                                                                                                                                                                                                                                                                                                                                                                                                                                                                                                                                                                                                                                                                                                                                                                                                                                                                                                                                                                                                                                                                                                                                                                                                                                                                                                                                                                                                                                                                                                                                                                                                                                                                                                                                                                                                                                                                                                                                                                                                             | -2.21986 | -0.21742 |         |          |   |          |         |         |   |          |          |          |   |          |         |          |   |          |         |          |   |          |         |          |   |          |          |          |   |          |         |          |   |          |          |         |   |          |          |         |   |          |         |         |   |          |         |          |   |          |         |          |   |          |          |         |   |          |         |         |   |                                                                                                                                                                                                                                                                                                                                                                                                                                                                                                                                                                                                                                                                                                                                                                                                                                                                                                                                                                                                                                                                                                                            |         |         |          |          |          |         |          |          |          |         |         |          |         |          |          |          |         |          |          |          |         |          |         |          |         |          |         |          |          |          |          |          |          |          |          |          |          |          |         |          |          |          |          |          |          |          |         |          |         |          |         |          |          |          |          |         |          |          |         |         |          |         |   |         |         |          |                                                                                                                                                                                                                       |                                                                                                                                                                                                                                                                                                                                                                                                                                                                                                                                                                                                                                                                                                                                                                                                                                                                                                                                                                                                                                                                                                                                                                                                                                                                                                                                                                                                                                                                                                                                                                                                                                                                                                                                                                                                                                                                                                                                                                                                                                                                                                                                                                                                                                                                                                                                                              |         |          |          |         |          |          |         |         |         |         |                                                                                                                                                                                                                        |                                                                                                                                                                                                                                                                                                                                                                                                                                                                                                                                                                                                                                                                                                                                                                                                                                                                                                                                                                                                                                                                                                                                                                                                                                                                                                                                                                                                                                                                                                                                                                                                                                                                                                                                                                                                                                                                                                                                                                                                                                                                                                                                                                                                                                                                                                                                                                                                                                                                                                                                                                                      |   |          |          |          |   |          |          |          |   |          |         |          |   |         |          |          |   |          |         |          |   |          |          |          |   |         |          |          |   |          |         |         |   |          |          |         |   |          |          |         |   |          |         |          |   |          |          |          |   |          |          |         |   |          |          |          |   |          |          |          |   |          |          |         |   |          |          |         |   |          |          |          |   |          |          |          |   |          |          |          |   |          |          |          |   |          |          |          |   |          |          |          |   |          |          |         |   |         |          |          |   |          |         |         |   |          |         |         |   |         |          |          |   |         |          |          |   |         |          |          |   |         |          |          |   |          |          |          |   |         |          |          |   |          |          |          |   |          |          |          |
| H                                                                                                                                                                                                                     | -0.20826                                                                                                                                                                                                                                                                                                                                                                                                                                                                                                                                                                                                                                                                                                                                                                                                                                                                                                                                                                                                                                                                                                                                                                                                                                                                                                                                                                                                                                                                                                                                                                                                                                                                                                                                                                                                                                                                                                                                                                                                                                                                                                                                                                                                                                                                                                                                                                                                                                                                                                                                                             | -3.64373 | 1.66936  |         |          |   |          |         |         |   |          |          |          |   |          |         |          |   |          |         |          |   |          |         |          |   |          |          |          |   |          |         |          |   |          |          |         |   |          |          |         |   |          |         |         |   |          |         |          |   |          |         |          |   |          |          |         |   |          |         |         |   |                                                                                                                                                                                                                                                                                                                                                                                                                                                                                                                                                                                                                                                                                                                                                                                                                                                                                                                                                                                                                                                                                                                            |         |         |          |          |          |         |          |          |          |         |         |          |         |          |          |          |         |          |          |          |         |          |         |          |         |          |         |          |          |          |          |          |          |          |          |          |          |          |         |          |          |          |          |          |          |          |         |          |         |          |         |          |          |          |          |         |          |          |         |         |          |         |   |         |         |          |                                                                                                                                                                                                                       |                                                                                                                                                                                                                                                                                                                                                                                                                                                                                                                                                                                                                                                                                                                                                                                                                                                                                                                                                                                                                                                                                                                                                                                                                                                                                                                                                                                                                                                                                                                                                                                                                                                                                                                                                                                                                                                                                                                                                                                                                                                                                                                                                                                                                                                                                                                                                              |         |          |          |         |          |          |         |         |         |         |                                                                                                                                                                                                                        |                                                                                                                                                                                                                                                                                                                                                                                                                                                                                                                                                                                                                                                                                                                                                                                                                                                                                                                                                                                                                                                                                                                                                                                                                                                                                                                                                                                                                                                                                                                                                                                                                                                                                                                                                                                                                                                                                                                                                                                                                                                                                                                                                                                                                                                                                                                                                                                                                                                                                                                                                                                      |   |          |          |          |   |          |          |          |   |          |         |          |   |         |          |          |   |          |         |          |   |          |          |          |   |         |          |          |   |          |         |         |   |          |          |         |   |          |          |         |   |          |         |          |   |          |          |          |   |          |          |         |   |          |          |          |   |          |          |          |   |          |          |         |   |          |          |         |   |          |          |          |   |          |          |          |   |          |          |          |   |          |          |          |   |          |          |          |   |          |          |          |   |          |          |         |   |         |          |          |   |          |         |         |   |          |         |         |   |         |          |          |   |         |          |          |   |         |          |          |   |         |          |          |   |          |          |          |   |         |          |          |   |          |          |          |   |          |          |          |
| H                                                                                                                                                                                                                     | -0.06065                                                                                                                                                                                                                                                                                                                                                                                                                                                                                                                                                                                                                                                                                                                                                                                                                                                                                                                                                                                                                                                                                                                                                                                                                                                                                                                                                                                                                                                                                                                                                                                                                                                                                                                                                                                                                                                                                                                                                                                                                                                                                                                                                                                                                                                                                                                                                                                                                                                                                                                                                             | -2.23788 | 4.22001  |         |          |   |          |         |         |   |          |          |          |   |          |         |          |   |          |         |          |   |          |         |          |   |          |          |          |   |          |         |          |   |          |          |         |   |          |          |         |   |          |         |         |   |          |         |          |   |          |         |          |   |          |          |         |   |          |         |         |   |                                                                                                                                                                                                                                                                                                                                                                                                                                                                                                                                                                                                                                                                                                                                                                                                                                                                                                                                                                                                                                                                                                                            |         |         |          |          |          |         |          |          |          |         |         |          |         |          |          |          |         |          |          |          |         |          |         |          |         |          |         |          |          |          |          |          |          |          |          |          |          |          |         |          |          |          |          |          |          |          |         |          |         |          |         |          |          |          |          |         |          |          |         |         |          |         |   |         |         |          |                                                                                                                                                                                                                       |                                                                                                                                                                                                                                                                                                                                                                                                                                                                                                                                                                                                                                                                                                                                                                                                                                                                                                                                                                                                                                                                                                                                                                                                                                                                                                                                                                                                                                                                                                                                                                                                                                                                                                                                                                                                                                                                                                                                                                                                                                                                                                                                                                                                                                                                                                                                                              |         |          |          |         |          |          |         |         |         |         |                                                                                                                                                                                                                        |                                                                                                                                                                                                                                                                                                                                                                                                                                                                                                                                                                                                                                                                                                                                                                                                                                                                                                                                                                                                                                                                                                                                                                                                                                                                                                                                                                                                                                                                                                                                                                                                                                                                                                                                                                                                                                                                                                                                                                                                                                                                                                                                                                                                                                                                                                                                                                                                                                                                                                                                                                                      |   |          |          |          |   |          |          |          |   |          |         |          |   |         |          |          |   |          |         |          |   |          |          |          |   |         |          |          |   |          |         |         |   |          |          |         |   |          |          |         |   |          |         |          |   |          |          |          |   |          |          |         |   |          |          |          |   |          |          |          |   |          |          |         |   |          |          |         |   |          |          |          |   |          |          |          |   |          |          |          |   |          |          |          |   |          |          |          |   |          |          |          |   |          |          |         |   |         |          |          |   |          |         |         |   |          |         |         |   |         |          |          |   |         |          |          |   |         |          |          |   |         |          |          |   |          |          |          |   |         |          |          |   |          |          |          |   |          |          |          |
| H                                                                                                                                                                                                                     | -0.17834                                                                                                                                                                                                                                                                                                                                                                                                                                                                                                                                                                                                                                                                                                                                                                                                                                                                                                                                                                                                                                                                                                                                                                                                                                                                                                                                                                                                                                                                                                                                                                                                                                                                                                                                                                                                                                                                                                                                                                                                                                                                                                                                                                                                                                                                                                                                                                                                                                                                                                                                                             | -2.66579 | 3.97990  |         |          |   |          |         |         |   |          |          |          |   |          |         |          |   |          |         |          |   |          |         |          |   |          |          |          |   |          |         |          |   |          |          |         |   |          |          |         |   |          |         |         |   |          |         |          |   |          |         |          |   |          |          |         |   |          |         |         |   |                                                                                                                                                                                                                                                                                                                                                                                                                                                                                                                                                                                                                                                                                                                                                                                                                                                                                                                                                                                                                                                                                                                            |         |         |          |          |          |         |          |          |          |         |         |          |         |          |          |          |         |          |          |          |         |          |         |          |         |          |         |          |          |          |          |          |          |          |          |          |          |          |         |          |          |          |          |          |          |          |         |          |         |          |         |          |          |          |          |         |          |          |         |         |          |         |   |         |         |          |                                                                                                                                                                                                                       |                                                                                                                                                                                                                                                                                                                                                                                                                                                                                                                                                                                                                                                                                                                                                                                                                                                                                                                                                                                                                                                                                                                                                                                                                                                                                                                                                                                                                                                                                                                                                                                                                                                                                                                                                                                                                                                                                                                                                                                                                                                                                                                                                                                                                                                                                                                                                              |         |          |          |         |          |          |         |         |         |         |                                                                                                                                                                                                                        |                                                                                                                                                                                                                                                                                                                                                                                                                                                                                                                                                                                                                                                                                                                                                                                                                                                                                                                                                                                                                                                                                                                                                                                                                                                                                                                                                                                                                                                                                                                                                                                                                                                                                                                                                                                                                                                                                                                                                                                                                                                                                                                                                                                                                                                                                                                                                                                                                                                                                                                                                                                      |   |          |          |          |   |          |          |          |   |          |         |          |   |         |          |          |   |          |         |          |   |          |          |          |   |         |          |          |   |          |         |         |   |          |          |         |   |          |          |         |   |          |         |          |   |          |          |          |   |          |          |         |   |          |          |          |   |          |          |          |   |          |          |         |   |          |          |         |   |          |          |          |   |          |          |          |   |          |          |          |   |          |          |          |   |          |          |          |   |          |          |          |   |          |          |         |   |         |          |          |   |          |         |         |   |          |         |         |   |         |          |          |   |         |          |          |   |         |          |          |   |         |          |          |   |          |          |          |   |         |          |          |   |          |          |          |   |          |          |          |
| C                                                                                                                                                                                                                     | -0.10812                                                                                                                                                                                                                                                                                                                                                                                                                                                                                                                                                                                                                                                                                                                                                                                                                                                                                                                                                                                                                                                                                                                                                                                                                                                                                                                                                                                                                                                                                                                                                                                                                                                                                                                                                                                                                                                                                                                                                                                                                                                                                                                                                                                                                                                                                                                                                                                                                                                                                                                                                             | -1.41627 | -2.30672 |         |          |   |          |         |         |   |          |          |          |   |          |         |          |   |          |         |          |   |          |         |          |   |          |          |          |   |          |         |          |   |          |          |         |   |          |          |         |   |          |         |         |   |          |         |          |   |          |         |          |   |          |          |         |   |          |         |         |   |                                                                                                                                                                                                                                                                                                                                                                                                                                                                                                                                                                                                                                                                                                                                                                                                                                                                                                                                                                                                                                                                                                                            |         |         |          |          |          |         |          |          |          |         |         |          |         |          |          |          |         |          |          |          |         |          |         |          |         |          |         |          |          |          |          |          |          |          |          |          |          |          |         |          |          |          |          |          |          |          |         |          |         |          |         |          |          |          |          |         |          |          |         |         |          |         |   |         |         |          |                                                                                                                                                                                                                       |                                                                                                                                                                                                                                                                                                                                                                                                                                                                                                                                                                                                                                                                                                                                                                                                                                                                                                                                                                                                                                                                                                                                                                                                                                                                                                                                                                                                                                                                                                                                                                                                                                                                                                                                                                                                                                                                                                                                                                                                                                                                                                                                                                                                                                                                                                                                                              |         |          |          |         |          |          |         |         |         |         |                                                                                                                                                                                                                        |                                                                                                                                                                                                                                                                                                                                                                                                                                                                                                                                                                                                                                                                                                                                                                                                                                                                                                                                                                                                                                                                                                                                                                                                                                                                                                                                                                                                                                                                                                                                                                                                                                                                                                                                                                                                                                                                                                                                                                                                                                                                                                                                                                                                                                                                                                                                                                                                                                                                                                                                                                                      |   |          |          |          |   |          |          |          |   |          |         |          |   |         |          |          |   |          |         |          |   |          |          |          |   |         |          |          |   |          |         |         |   |          |          |         |   |          |          |         |   |          |         |          |   |          |          |          |   |          |          |         |   |          |          |          |   |          |          |          |   |          |          |         |   |          |          |         |   |          |          |          |   |          |          |          |   |          |          |          |   |          |          |          |   |          |          |          |   |          |          |          |   |          |          |         |   |         |          |          |   |          |         |         |   |          |         |         |   |         |          |          |   |         |          |          |   |         |          |          |   |         |          |          |   |          |          |          |   |         |          |          |   |          |          |          |   |          |          |          |
| H                                                                                                                                                                                                                     | -0.82103                                                                                                                                                                                                                                                                                                                                                                                                                                                                                                                                                                                                                                                                                                                                                                                                                                                                                                                                                                                                                                                                                                                                                                                                                                                                                                                                                                                                                                                                                                                                                                                                                                                                                                                                                                                                                                                                                                                                                                                                                                                                                                                                                                                                                                                                                                                                                                                                                                                                                                                                                             | -1.95273 | -1.68611 |         |          |   |          |         |         |   |          |          |          |   |          |         |          |   |          |         |          |   |          |         |          |   |          |          |          |   |          |         |          |   |          |          |         |   |          |          |         |   |          |         |         |   |          |         |          |   |          |         |          |   |          |          |         |   |          |         |         |   |                                                                                                                                                                                                                                                                                                                                                                                                                                                                                                                                                                                                                                                                                                                                                                                                                                                                                                                                                                                                                                                                                                                            |         |         |          |          |          |         |          |          |          |         |         |          |         |          |          |          |         |          |          |          |         |          |         |          |         |          |         |          |          |          |          |          |          |          |          |          |          |          |         |          |          |          |          |          |          |          |         |          |         |          |         |          |          |          |          |         |          |          |         |         |          |         |   |         |         |          |                                                                                                                                                                                                                       |                                                                                                                                                                                                                                                                                                                                                                                                                                                                                                                                                                                                                                                                                                                                                                                                                                                                                                                                                                                                                                                                                                                                                                                                                                                                                                                                                                                                                                                                                                                                                                                                                                                                                                                                                                                                                                                                                                                                                                                                                                                                                                                                                                                                                                                                                                                                                              |         |          |          |         |          |          |         |         |         |         |                                                                                                                                                                                                                        |                                                                                                                                                                                                                                                                                                                                                                                                                                                                                                                                                                                                                                                                                                                                                                                                                                                                                                                                                                                                                                                                                                                                                                                                                                                                                                                                                                                                                                                                                                                                                                                                                                                                                                                                                                                                                                                                                                                                                                                                                                                                                                                                                                                                                                                                                                                                                                                                                                                                                                                                                                                      |   |          |          |          |   |          |          |          |   |          |         |          |   |         |          |          |   |          |         |          |   |          |          |          |   |         |          |          |   |          |         |         |   |          |          |         |   |          |          |         |   |          |         |          |   |          |          |          |   |          |          |         |   |          |          |          |   |          |          |          |   |          |          |         |   |          |          |         |   |          |          |          |   |          |          |          |   |          |          |          |   |          |          |          |   |          |          |          |   |          |          |          |   |          |          |         |   |         |          |          |   |          |         |         |   |          |         |         |   |         |          |          |   |         |          |          |   |         |          |          |   |         |          |          |   |          |          |          |   |         |          |          |   |          |          |          |   |          |          |          |
| H                                                                                                                                                                                                                     | 0.03800                                                                                                                                                                                                                                                                                                                                                                                                                                                                                                                                                                                                                                                                                                                                                                                                                                                                                                                                                                                                                                                                                                                                                                                                                                                                                                                                                                                                                                                                                                                                                                                                                                                                                                                                                                                                                                                                                                                                                                                                                                                                                                                                                                                                                                                                                                                                                                                                                                                                                                                                                              | 3.88398  | -1.18398 |         |          |   |          |         |         |   |          |          |          |   |          |         |          |   |          |         |          |   |          |         |          |   |          |          |          |   |          |         |          |   |          |          |         |   |          |          |         |   |          |         |         |   |          |         |          |   |          |         |          |   |          |          |         |   |          |         |         |   |                                                                                                                                                                                                                                                                                                                                                                                                                                                                                                                                                                                                                                                                                                                                                                                                                                                                                                                                                                                                                                                                                                                            |         |         |          |          |          |         |          |          |          |         |         |          |         |          |          |          |         |          |          |          |         |          |         |          |         |          |         |          |          |          |          |          |          |          |          |          |          |          |         |          |          |          |          |          |          |          |         |          |         |          |         |          |          |          |          |         |          |          |         |         |          |         |   |         |         |          |                                                                                                                                                                                                                       |                                                                                                                                                                                                                                                                                                                                                                                                                                                                                                                                                                                                                                                                                                                                                                                                                                                                                                                                                                                                                                                                                                                                                                                                                                                                                                                                                                                                                                                                                                                                                                                                                                                                                                                                                                                                                                                                                                                                                                                                                                                                                                                                                                                                                                                                                                                                                              |         |          |          |         |          |          |         |         |         |         |                                                                                                                                                                                                                        |                                                                                                                                                                                                                                                                                                                                                                                                                                                                                                                                                                                                                                                                                                                                                                                                                                                                                                                                                                                                                                                                                                                                                                                                                                                                                                                                                                                                                                                                                                                                                                                                                                                                                                                                                                                                                                                                                                                                                                                                                                                                                                                                                                                                                                                                                                                                                                                                                                                                                                                                                                                      |   |          |          |          |   |          |          |          |   |          |         |          |   |         |          |          |   |          |         |          |   |          |          |          |   |         |          |          |   |          |         |         |   |          |          |         |   |          |          |         |   |          |         |          |   |          |          |          |   |          |          |         |   |          |          |          |   |          |          |          |   |          |          |         |   |          |          |         |   |          |          |          |   |          |          |          |   |          |          |          |   |          |          |          |   |          |          |          |   |          |          |          |   |          |          |         |   |         |          |          |   |          |         |         |   |          |         |         |   |         |          |          |   |         |          |          |   |         |          |          |   |         |          |          |   |          |          |          |   |         |          |          |   |          |          |          |   |          |          |          |
| H                                                                                                                                                                                                                     | 0.10715                                                                                                                                                                                                                                                                                                                                                                                                                                                                                                                                                                                                                                                                                                                                                                                                                                                                                                                                                                                                                                                                                                                                                                                                                                                                                                                                                                                                                                                                                                                                                                                                                                                                                                                                                                                                                                                                                                                                                                                                                                                                                                                                                                                                                                                                                                                                                                                                                                                                                                                                                              | 3.01816  | -3.54027 |         |          |   |          |         |         |   |          |          |          |   |          |         |          |   |          |         |          |   |          |         |          |   |          |          |          |   |          |         |          |   |          |          |         |   |          |          |         |   |          |         |         |   |          |         |          |   |          |         |          |   |          |          |         |   |          |         |         |   |                                                                                                                                                                                                                                                                                                                                                                                                                                                                                                                                                                                                                                                                                                                                                                                                                                                                                                                                                                                                                                                                                                                            |         |         |          |          |          |         |          |          |          |         |         |          |         |          |          |          |         |          |          |          |         |          |         |          |         |          |         |          |          |          |          |          |          |          |          |          |          |          |         |          |          |          |          |          |          |          |         |          |         |          |         |          |          |          |          |         |          |          |         |         |          |         |   |         |         |          |                                                                                                                                                                                                                       |                                                                                                                                                                                                                                                                                                                                                                                                                                                                                                                                                                                                                                                                                                                                                                                                                                                                                                                                                                                                                                                                                                                                                                                                                                                                                                                                                                                                                                                                                                                                                                                                                                                                                                                                                                                                                                                                                                                                                                                                                                                                                                                                                                                                                                                                                                                                                              |         |          |          |         |          |          |         |         |         |         |                                                                                                                                                                                                                        |                                                                                                                                                                                                                                                                                                                                                                                                                                                                                                                                                                                                                                                                                                                                                                                                                                                                                                                                                                                                                                                                                                                                                                                                                                                                                                                                                                                                                                                                                                                                                                                                                                                                                                                                                                                                                                                                                                                                                                                                                                                                                                                                                                                                                                                                                                                                                                                                                                                                                                                                                                                      |   |          |          |          |   |          |          |          |   |          |         |          |   |         |          |          |   |          |         |          |   |          |          |          |   |         |          |          |   |          |         |         |   |          |          |         |   |          |          |         |   |          |         |          |   |          |          |          |   |          |          |         |   |          |          |          |   |          |          |          |   |          |          |         |   |          |          |         |   |          |          |          |   |          |          |          |   |          |          |          |   |          |          |          |   |          |          |          |   |          |          |          |   |          |          |         |   |         |          |          |   |          |         |         |   |          |         |         |   |         |          |          |   |         |          |          |   |         |          |          |   |         |          |          |   |          |          |          |   |         |          |          |   |          |          |          |   |          |          |          |
| O                                                                                                                                                                                                                     | 0.03882                                                                                                                                                                                                                                                                                                                                                                                                                                                                                                                                                                                                                                                                                                                                                                                                                                                                                                                                                                                                                                                                                                                                                                                                                                                                                                                                                                                                                                                                                                                                                                                                                                                                                                                                                                                                                                                                                                                                                                                                                                                                                                                                                                                                                                                                                                                                                                                                                                                                                                                                                              | 1.53376  | 2.33572  |         |          |   |          |         |         |   |          |          |          |   |          |         |          |   |          |         |          |   |          |         |          |   |          |          |          |   |          |         |          |   |          |          |         |   |          |          |         |   |          |         |         |   |          |         |          |   |          |         |          |   |          |          |         |   |          |         |         |   |                                                                                                                                                                                                                                                                                                                                                                                                                                                                                                                                                                                                                                                                                                                                                                                                                                                                                                                                                                                                                                                                                                                            |         |         |          |          |          |         |          |          |          |         |         |          |         |          |          |          |         |          |          |          |         |          |         |          |         |          |         |          |          |          |          |          |          |          |          |          |          |          |         |          |          |          |          |          |          |          |         |          |         |          |         |          |          |          |          |         |          |          |         |         |          |         |   |         |         |          |                                                                                                                                                                                                                       |                                                                                                                                                                                                                                                                                                                                                                                                                                                                                                                                                                                                                                                                                                                                                                                                                                                                                                                                                                                                                                                                                                                                                                                                                                                                                                                                                                                                                                                                                                                                                                                                                                                                                                                                                                                                                                                                                                                                                                                                                                                                                                                                                                                                                                                                                                                                                              |         |          |          |         |          |          |         |         |         |         |                                                                                                                                                                                                                        |                                                                                                                                                                                                                                                                                                                                                                                                                                                                                                                                                                                                                                                                                                                                                                                                                                                                                                                                                                                                                                                                                                                                                                                                                                                                                                                                                                                                                                                                                                                                                                                                                                                                                                                                                                                                                                                                                                                                                                                                                                                                                                                                                                                                                                                                                                                                                                                                                                                                                                                                                                                      |   |          |          |          |   |          |          |          |   |          |         |          |   |         |          |          |   |          |         |          |   |          |          |          |   |         |          |          |   |          |         |         |   |          |          |         |   |          |          |         |   |          |         |          |   |          |          |          |   |          |          |         |   |          |          |          |   |          |          |          |   |          |          |         |   |          |          |         |   |          |          |          |   |          |          |          |   |          |          |          |   |          |          |          |   |          |          |          |   |          |          |          |   |          |          |         |   |         |          |          |   |          |         |         |   |          |         |         |   |         |          |          |   |         |          |          |   |         |          |          |   |         |          |          |   |          |          |          |   |         |          |          |   |          |          |          |   |          |          |          |
| C                                                                                                                                                                                                                     | 0.10817                                                                                                                                                                                                                                                                                                                                                                                                                                                                                                                                                                                                                                                                                                                                                                                                                                                                                                                                                                                                                                                                                                                                                                                                                                                                                                                                                                                                                                                                                                                                                                                                                                                                                                                                                                                                                                                                                                                                                                                                                                                                                                                                                                                                                                                                                                                                                                                                                                                                                                                                                              | 2.04900  | 3.65352  |         |          |   |          |         |         |   |          |          |          |   |          |         |          |   |          |         |          |   |          |         |          |   |          |          |          |   |          |         |          |   |          |          |         |   |          |          |         |   |          |         |         |   |          |         |          |   |          |         |          |   |          |          |         |   |          |         |         |   |                                                                                                                                                                                                                                                                                                                                                                                                                                                                                                                                                                                                                                                                                                                                                                                                                                                                                                                                                                                                                                                                                                                            |         |         |          |          |          |         |          |          |          |         |         |          |         |          |          |          |         |          |          |          |         |          |         |          |         |          |         |          |          |          |          |          |          |          |          |          |          |          |         |          |          |          |          |          |          |          |         |          |         |          |         |          |          |          |          |         |          |          |         |         |          |         |   |         |         |          |                                                                                                                                                                                                                       |                                                                                                                                                                                                                                                                                                                                                                                                                                                                                                                                                                                                                                                                                                                                                                                                                                                                                                                                                                                                                                                                                                                                                                                                                                                                                                                                                                                                                                                                                                                                                                                                                                                                                                                                                                                                                                                                                                                                                                                                                                                                                                                                                                                                                                                                                                                                                              |         |          |          |         |          |          |         |         |         |         |                                                                                                                                                                                                                        |                                                                                                                                                                                                                                                                                                                                                                                                                                                                                                                                                                                                                                                                                                                                                                                                                                                                                                                                                                                                                                                                                                                                                                                                                                                                                                                                                                                                                                                                                                                                                                                                                                                                                                                                                                                                                                                                                                                                                                                                                                                                                                                                                                                                                                                                                                                                                                                                                                                                                                                                                                                      |   |          |          |          |   |          |          |          |   |          |         |          |   |         |          |          |   |          |         |          |   |          |          |          |   |         |          |          |   |          |         |         |   |          |          |         |   |          |          |         |   |          |         |          |   |          |          |          |   |          |          |         |   |          |          |          |   |          |          |          |   |          |          |         |   |          |          |         |   |          |          |          |   |          |          |          |   |          |          |          |   |          |          |          |   |          |          |          |   |          |          |          |   |          |          |         |   |         |          |          |   |          |         |         |   |          |         |         |   |         |          |          |   |         |          |          |   |         |          |          |   |         |          |          |   |          |          |          |   |         |          |          |   |          |          |          |   |          |          |          |
| H                                                                                                                                                                                                                     | 0.98720                                                                                                                                                                                                                                                                                                                                                                                                                                                                                                                                                                                                                                                                                                                                                                                                                                                                                                                                                                                                                                                                                                                                                                                                                                                                                                                                                                                                                                                                                                                                                                                                                                                                                                                                                                                                                                                                                                                                                                                                                                                                                                                                                                                                                                                                                                                                                                                                                                                                                                                                                              | 1.66943  | 4.18298  |         |          |   |          |         |         |   |          |          |          |   |          |         |          |   |          |         |          |   |          |         |          |   |          |          |          |   |          |         |          |   |          |          |         |   |          |          |         |   |          |         |         |   |          |         |          |   |          |         |          |   |          |          |         |   |          |         |         |   |                                                                                                                                                                                                                                                                                                                                                                                                                                                                                                                                                                                                                                                                                                                                                                                                                                                                                                                                                                                                                                                                                                                            |         |         |          |          |          |         |          |          |          |         |         |          |         |          |          |          |         |          |          |          |         |          |         |          |         |          |         |          |          |          |          |          |          |          |          |          |          |          |         |          |          |          |          |          |          |          |         |          |         |          |         |          |          |          |          |         |          |          |         |         |          |         |   |         |         |          |                                                                                                                                                                                                                       |                                                                                                                                                                                                                                                                                                                                                                                                                                                                                                                                                                                                                                                                                                                                                                                                                                                                                                                                                                                                                                                                                                                                                                                                                                                                                                                                                                                                                                                                                                                                                                                                                                                                                                                                                                                                                                                                                                                                                                                                                                                                                                                                                                                                                                                                                                                                                              |         |          |          |         |          |          |         |         |         |         |                                                                                                                                                                                                                        |                                                                                                                                                                                                                                                                                                                                                                                                                                                                                                                                                                                                                                                                                                                                                                                                                                                                                                                                                                                                                                                                                                                                                                                                                                                                                                                                                                                                                                                                                                                                                                                                                                                                                                                                                                                                                                                                                                                                                                                                                                                                                                                                                                                                                                                                                                                                                                                                                                                                                                                                                                                      |   |          |          |          |   |          |          |          |   |          |         |          |   |         |          |          |   |          |         |          |   |          |          |          |   |         |          |          |   |          |         |         |   |          |          |         |   |          |          |         |   |          |         |          |   |          |          |          |   |          |          |         |   |          |          |          |   |          |          |          |   |          |          |         |   |          |          |         |   |          |          |          |   |          |          |          |   |          |          |          |   |          |          |          |   |          |          |          |   |          |          |          |   |          |          |         |   |         |          |          |   |          |         |         |   |          |         |         |   |         |          |          |   |         |          |          |   |         |          |          |   |         |          |          |   |          |          |          |   |         |          |          |   |          |          |          |   |          |          |          |
| H                                                                                                                                                                                                                     | -0.79187                                                                                                                                                                                                                                                                                                                                                                                                                                                                                                                                                                                                                                                                                                                                                                                                                                                                                                                                                                                                                                                                                                                                                                                                                                                                                                                                                                                                                                                                                                                                                                                                                                                                                                                                                                                                                                                                                                                                                                                                                                                                                                                                                                                                                                                                                                                                                                                                                                                                                                                                                             | 1.80402  | 4.22541  |         |          |   |          |         |         |   |          |          |          |   |          |         |          |   |          |         |          |   |          |         |          |   |          |          |          |   |          |         |          |   |          |          |         |   |          |          |         |   |          |         |         |   |          |         |          |   |          |         |          |   |          |          |         |   |          |         |         |   |                                                                                                                                                                                                                                                                                                                                                                                                                                                                                                                                                                                                                                                                                                                                                                                                                                                                                                                                                                                                                                                                                                                            |         |         |          |          |          |         |          |          |          |         |         |          |         |          |          |          |         |          |          |          |         |          |         |          |         |          |         |          |          |          |          |          |          |          |          |          |          |          |         |          |          |          |          |          |          |          |         |          |         |          |         |          |          |          |          |         |          |          |         |         |          |         |   |         |         |          |                                                                                                                                                                                                                       |                                                                                                                                                                                                                                                                                                                                                                                                                                                                                                                                                                                                                                                                                                                                                                                                                                                                                                                                                                                                                                                                                                                                                                                                                                                                                                                                                                                                                                                                                                                                                                                                                                                                                                                                                                                                                                                                                                                                                                                                                                                                                                                                                                                                                                                                                                                                                              |         |          |          |         |          |          |         |         |         |         |                                                                                                                                                                                                                        |                                                                                                                                                                                                                                                                                                                                                                                                                                                                                                                                                                                                                                                                                                                                                                                                                                                                                                                                                                                                                                                                                                                                                                                                                                                                                                                                                                                                                                                                                                                                                                                                                                                                                                                                                                                                                                                                                                                                                                                                                                                                                                                                                                                                                                                                                                                                                                                                                                                                                                                                                                                      |   |          |          |          |   |          |          |          |   |          |         |          |   |         |          |          |   |          |         |          |   |          |          |          |   |         |          |          |   |          |         |         |   |          |          |         |   |          |          |         |   |          |         |          |   |          |          |          |   |          |          |         |   |          |          |          |   |          |          |          |   |          |          |         |   |          |          |         |   |          |          |          |   |          |          |          |   |          |          |          |   |          |          |          |   |          |          |          |   |          |          |          |   |          |          |         |   |         |          |          |   |          |         |         |   |          |         |         |   |         |          |          |   |         |          |          |   |         |          |          |   |         |          |          |   |          |          |          |   |         |          |          |   |          |          |          |   |          |          |          |
| H                                                                                                                                                                                                                     | 0.18678                                                                                                                                                                                                                                                                                                                                                                                                                                                                                                                                                                                                                                                                                                                                                                                                                                                                                                                                                                                                                                                                                                                                                                                                                                                                                                                                                                                                                                                                                                                                                                                                                                                                                                                                                                                                                                                                                                                                                                                                                                                                                                                                                                                                                                                                                                                                                                                                                                                                                                                                                              | 3.12869  | 3.54139  |         |          |   |          |         |         |   |          |          |          |   |          |         |          |   |          |         |          |   |          |         |          |   |          |          |          |   |          |         |          |   |          |          |         |   |          |          |         |   |          |         |         |   |          |         |          |   |          |         |          |   |          |          |         |   |          |         |         |   |                                                                                                                                                                                                                                                                                                                                                                                                                                                                                                                                                                                                                                                                                                                                                                                                                                                                                                                                                                                                                                                                                                                            |         |         |          |          |          |         |          |          |          |         |         |          |         |          |          |          |         |          |          |          |         |          |         |          |         |          |         |          |          |          |          |          |          |          |          |          |          |          |         |          |          |          |          |          |          |          |         |          |         |          |         |          |          |          |          |         |          |          |         |         |          |         |   |         |         |          |                                                                                                                                                                                                                       |                                                                                                                                                                                                                                                                                                                                                                                                                                                                                                                                                                                                                                                                                                                                                                                                                                                                                                                                                                                                                                                                                                                                                                                                                                                                                                                                                                                                                                                                                                                                                                                                                                                                                                                                                                                                                                                                                                                                                                                                                                                                                                                                                                                                                                                                                                                                                              |         |          |          |         |          |          |         |         |         |         |                                                                                                                                                                                                                        |                                                                                                                                                                                                                                                                                                                                                                                                                                                                                                                                                                                                                                                                                                                                                                                                                                                                                                                                                                                                                                                                                                                                                                                                                                                                                                                                                                                                                                                                                                                                                                                                                                                                                                                                                                                                                                                                                                                                                                                                                                                                                                                                                                                                                                                                                                                                                                                                                                                                                                                                                                                      |   |          |          |          |   |          |          |          |   |          |         |          |   |         |          |          |   |          |         |          |   |          |          |          |   |         |          |          |   |          |         |         |   |          |          |         |   |          |          |         |   |          |         |          |   |          |          |          |   |          |          |         |   |          |          |          |   |          |          |          |   |          |          |         |   |          |          |         |   |          |          |          |   |          |          |          |   |          |          |          |   |          |          |          |   |          |          |          |   |          |          |          |   |          |          |         |   |         |          |          |   |          |         |         |   |          |         |         |   |         |          |          |   |         |          |          |   |         |          |          |   |         |          |          |   |          |          |          |   |         |          |          |   |          |          |          |   |          |          |          |
| C                                                                                                                                                                                                                     | 1.28921                                                                                                                                                                                                                                                                                                                                                                                                                                                                                                                                                                                                                                                                                                                                                                                                                                                                                                                                                                                                                                                                                                                                                                                                                                                                                                                                                                                                                                                                                                                                                                                                                                                                                                                                                                                                                                                                                                                                                                                                                                                                                                                                                                                                                                                                                                                                                                                                                                                                                                                                                              | -2.04978 | -2.18024 |         |          |   |          |         |         |   |          |          |          |   |          |         |          |   |          |         |          |   |          |         |          |   |          |          |          |   |          |         |          |   |          |          |         |   |          |          |         |   |          |         |         |   |          |         |          |   |          |         |          |   |          |          |         |   |          |         |         |   |                                                                                                                                                                                                                                                                                                                                                                                                                                                                                                                                                                                                                                                                                                                                                                                                                                                                                                                                                                                                                                                                                                                            |         |         |          |          |          |         |          |          |          |         |         |          |         |          |          |          |         |          |          |          |         |          |         |          |         |          |         |          |          |          |          |          |          |          |          |          |          |          |         |          |          |          |          |          |          |          |         |          |         |          |         |          |          |          |          |         |          |          |         |         |          |         |   |         |         |          |                                                                                                                                                                                                                       |                                                                                                                                                                                                                                                                                                                                                                                                                                                                                                                                                                                                                                                                                                                                                                                                                                                                                                                                                                                                                                                                                                                                                                                                                                                                                                                                                                                                                                                                                                                                                                                                                                                                                                                                                                                                                                                                                                                                                                                                                                                                                                                                                                                                                                                                                                                                                              |         |          |          |         |          |          |         |         |         |         |                                                                                                                                                                                                                        |                                                                                                                                                                                                                                                                                                                                                                                                                                                                                                                                                                                                                                                                                                                                                                                                                                                                                                                                                                                                                                                                                                                                                                                                                                                                                                                                                                                                                                                                                                                                                                                                                                                                                                                                                                                                                                                                                                                                                                                                                                                                                                                                                                                                                                                                                                                                                                                                                                                                                                                                                                                      |   |          |          |          |   |          |          |          |   |          |         |          |   |         |          |          |   |          |         |          |   |          |          |          |   |         |          |          |   |          |         |         |   |          |          |         |   |          |          |         |   |          |         |          |   |          |          |          |   |          |          |         |   |          |          |          |   |          |          |          |   |          |          |         |   |          |          |         |   |          |          |          |   |          |          |          |   |          |          |          |   |          |          |          |   |          |          |          |   |          |          |          |   |          |          |         |   |         |          |          |   |          |         |         |   |          |         |         |   |         |          |          |   |         |          |          |   |         |          |          |   |         |          |          |   |          |          |          |   |         |          |          |   |          |          |          |   |          |          |          |
| H                                                                                                                                                                                                                     | 1.95644                                                                                                                                                                                                                                                                                                                                                                                                                                                                                                                                                                                                                                                                                                                                                                                                                                                                                                                                                                                                                                                                                                                                                                                                                                                                                                                                                                                                                                                                                                                                                                                                                                                                                                                                                                                                                                                                                                                                                                                                                                                                                                                                                                                                                                                                                                                                                                                                                                                                                                                                                              | -1.57723 | -2.90486 |         |          |   |          |         |         |   |          |          |          |   |          |         |          |   |          |         |          |   |          |         |          |   |          |          |          |   |          |         |          |   |          |          |         |   |          |          |         |   |          |         |         |   |          |         |          |   |          |         |          |   |          |          |         |   |          |         |         |   |                                                                                                                                                                                                                                                                                                                                                                                                                                                                                                                                                                                                                                                                                                                                                                                                                                                                                                                                                                                                                                                                                                                            |         |         |          |          |          |         |          |          |          |         |         |          |         |          |          |          |         |          |          |          |         |          |         |          |         |          |         |          |          |          |          |          |          |          |          |          |          |          |         |          |          |          |          |          |          |          |         |          |         |          |         |          |          |          |          |         |          |          |         |         |          |         |   |         |         |          |                                                                                                                                                                                                                       |                                                                                                                                                                                                                                                                                                                                                                                                                                                                                                                                                                                                                                                                                                                                                                                                                                                                                                                                                                                                                                                                                                                                                                                                                                                                                                                                                                                                                                                                                                                                                                                                                                                                                                                                                                                                                                                                                                                                                                                                                                                                                                                                                                                                                                                                                                                                                              |         |          |          |         |          |          |         |         |         |         |                                                                                                                                                                                                                        |                                                                                                                                                                                                                                                                                                                                                                                                                                                                                                                                                                                                                                                                                                                                                                                                                                                                                                                                                                                                                                                                                                                                                                                                                                                                                                                                                                                                                                                                                                                                                                                                                                                                                                                                                                                                                                                                                                                                                                                                                                                                                                                                                                                                                                                                                                                                                                                                                                                                                                                                                                                      |   |          |          |          |   |          |          |          |   |          |         |          |   |         |          |          |   |          |         |          |   |          |          |          |   |         |          |          |   |          |         |         |   |          |          |         |   |          |          |         |   |          |         |          |   |          |          |          |   |          |          |         |   |          |          |          |   |          |          |          |   |          |          |         |   |          |          |         |   |          |          |          |   |          |          |          |   |          |          |          |   |          |          |          |   |          |          |          |   |          |          |          |   |          |          |         |   |         |          |          |   |          |         |         |   |          |         |         |   |         |          |          |   |         |          |          |   |         |          |          |   |         |          |          |   |          |          |          |   |         |          |          |   |          |          |          |   |          |          |          |
| H                                                                                                                                                                                                                     | 1.25124                                                                                                                                                                                                                                                                                                                                                                                                                                                                                                                                                                                                                                                                                                                                                                                                                                                                                                                                                                                                                                                                                                                                                                                                                                                                                                                                                                                                                                                                                                                                                                                                                                                                                                                                                                                                                                                                                                                                                                                                                                                                                                                                                                                                                                                                                                                                                                                                                                                                                                                                                              | -3.12061 | -2.39699 |         |          |   |          |         |         |   |          |          |          |   |          |         |          |   |          |         |          |   |          |         |          |   |          |          |          |   |          |         |          |   |          |          |         |   |          |          |         |   |          |         |         |   |          |         |          |   |          |         |          |   |          |          |         |   |          |         |         |   |                                                                                                                                                                                                                                                                                                                                                                                                                                                                                                                                                                                                                                                                                                                                                                                                                                                                                                                                                                                                                                                                                                                            |         |         |          |          |          |         |          |          |          |         |         |          |         |          |          |          |         |          |          |          |         |          |         |          |         |          |         |          |          |          |          |          |          |          |          |          |          |          |         |          |          |          |          |          |          |          |         |          |         |          |         |          |          |          |          |         |          |          |         |         |          |         |   |         |         |          |                                                                                                                                                                                                                       |                                                                                                                                                                                                                                                                                                                                                                                                                                                                                                                                                                                                                                                                                                                                                                                                                                                                                                                                                                                                                                                                                                                                                                                                                                                                                                                                                                                                                                                                                                                                                                                                                                                                                                                                                                                                                                                                                                                                                                                                                                                                                                                                                                                                                                                                                                                                                              |         |          |          |         |          |          |         |         |         |         |                                                                                                                                                                                                                        |                                                                                                                                                                                                                                                                                                                                                                                                                                                                                                                                                                                                                                                                                                                                                                                                                                                                                                                                                                                                                                                                                                                                                                                                                                                                                                                                                                                                                                                                                                                                                                                                                                                                                                                                                                                                                                                                                                                                                                                                                                                                                                                                                                                                                                                                                                                                                                                                                                                                                                                                                                                      |   |          |          |          |   |          |          |          |   |          |         |          |   |         |          |          |   |          |         |          |   |          |          |          |   |         |          |          |   |          |         |         |   |          |          |         |   |          |          |         |   |          |         |          |   |          |          |          |   |          |          |         |   |          |          |          |   |          |          |          |   |          |          |         |   |          |          |         |   |          |          |          |   |          |          |          |   |          |          |          |   |          |          |          |   |          |          |          |   |          |          |          |   |          |          |         |   |         |          |          |   |          |         |         |   |          |         |         |   |         |          |          |   |         |          |          |   |         |          |          |   |         |          |          |   |          |          |          |   |         |          |          |   |          |          |          |   |          |          |          |
| H                                                                                                                                                                                                                     | 1.71908                                                                                                                                                                                                                                                                                                                                                                                                                                                                                                                                                                                                                                                                                                                                                                                                                                                                                                                                                                                                                                                                                                                                                                                                                                                                                                                                                                                                                                                                                                                                                                                                                                                                                                                                                                                                                                                                                                                                                                                                                                                                                                                                                                                                                                                                                                                                                                                                                                                                                                                                                              | -1.90928 | -1.18895 |         |          |   |          |         |         |   |          |          |          |   |          |         |          |   |          |         |          |   |          |         |          |   |          |          |          |   |          |         |          |   |          |          |         |   |          |          |         |   |          |         |         |   |          |         |          |   |          |         |          |   |          |          |         |   |          |         |         |   |                                                                                                                                                                                                                                                                                                                                                                                                                                                                                                                                                                                                                                                                                                                                                                                                                                                                                                                                                                                                                                                                                                                            |         |         |          |          |          |         |          |          |          |         |         |          |         |          |          |          |         |          |          |          |         |          |         |          |         |          |         |          |          |          |          |          |          |          |          |          |          |          |         |          |          |          |          |          |          |          |         |          |         |          |         |          |          |          |          |         |          |          |         |         |          |         |   |         |         |          |                                                                                                                                                                                                                       |                                                                                                                                                                                                                                                                                                                                                                                                                                                                                                                                                                                                                                                                                                                                                                                                                                                                                                                                                                                                                                                                                                                                                                                                                                                                                                                                                                                                                                                                                                                                                                                                                                                                                                                                                                                                                                                                                                                                                                                                                                                                                                                                                                                                                                                                                                                                                              |         |          |          |         |          |          |         |         |         |         |                                                                                                                                                                                                                        |                                                                                                                                                                                                                                                                                                                                                                                                                                                                                                                                                                                                                                                                                                                                                                                                                                                                                                                                                                                                                                                                                                                                                                                                                                                                                                                                                                                                                                                                                                                                                                                                                                                                                                                                                                                                                                                                                                                                                                                                                                                                                                                                                                                                                                                                                                                                                                                                                                                                                                                                                                                      |   |          |          |          |   |          |          |          |   |          |         |          |   |         |          |          |   |          |         |          |   |          |          |          |   |         |          |          |   |          |         |         |   |          |          |         |   |          |          |         |   |          |         |          |   |          |          |          |   |          |          |         |   |          |          |          |   |          |          |          |   |          |          |         |   |          |          |         |   |          |          |          |   |          |          |          |   |          |          |          |   |          |          |          |   |          |          |          |   |          |          |          |   |          |          |         |   |         |          |          |   |          |         |         |   |          |         |         |   |         |          |          |   |         |          |          |   |         |          |          |   |         |          |          |   |          |          |          |   |         |          |          |   |          |          |          |   |          |          |          |
| C                                                                                                                                                                                                                     | -0.62184                                                                                                                                                                                                                                                                                                                                                                                                                                                                                                                                                                                                                                                                                                                                                                                                                                                                                                                                                                                                                                                                                                                                                                                                                                                                                                                                                                                                                                                                                                                                                                                                                                                                                                                                                                                                                                                                                                                                                                                                                                                                                                                                                                                                                                                                                                                                                                                                                                                                                                                                                             | -1.65019 | -3.73610 |         |          |   |          |         |         |   |          |          |          |   |          |         |          |   |          |         |          |   |          |         |          |   |          |          |          |   |          |         |          |   |          |          |         |   |          |          |         |   |          |         |         |   |          |         |          |   |          |         |          |   |          |          |         |   |          |         |         |   |                                                                                                                                                                                                                                                                                                                                                                                                                                                                                                                                                                                                                                                                                                                                                                                                                                                                                                                                                                                                                                                                                                                            |         |         |          |          |          |         |          |          |          |         |         |          |         |          |          |          |         |          |          |          |         |          |         |          |         |          |         |          |          |          |          |          |          |          |          |          |          |          |         |          |          |          |          |          |          |          |         |          |         |          |         |          |          |          |          |         |          |          |         |         |          |         |   |         |         |          |                                                                                                                                                                                                                       |                                                                                                                                                                                                                                                                                                                                                                                                                                                                                                                                                                                                                                                                                                                                                                                                                                                                                                                                                                                                                                                                                                                                                                                                                                                                                                                                                                                                                                                                                                                                                                                                                                                                                                                                                                                                                                                                                                                                                                                                                                                                                                                                                                                                                                                                                                                                                              |         |          |          |         |          |          |         |         |         |         |                                                                                                                                                                                                                        |                                                                                                                                                                                                                                                                                                                                                                                                                                                                                                                                                                                                                                                                                                                                                                                                                                                                                                                                                                                                                                                                                                                                                                                                                                                                                                                                                                                                                                                                                                                                                                                                                                                                                                                                                                                                                                                                                                                                                                                                                                                                                                                                                                                                                                                                                                                                                                                                                                                                                                                                                                                      |   |          |          |          |   |          |          |          |   |          |         |          |   |         |          |          |   |          |         |          |   |          |          |          |   |         |          |          |   |          |         |         |   |          |          |         |   |          |          |         |   |          |         |          |   |          |          |          |   |          |          |         |   |          |          |          |   |          |          |          |   |          |          |         |   |          |          |         |   |          |          |          |   |          |          |          |   |          |          |          |   |          |          |          |   |          |          |          |   |          |          |          |   |          |          |         |   |         |          |          |   |          |         |         |   |          |         |         |   |         |          |          |   |         |          |          |   |         |          |          |   |         |          |          |   |          |          |          |   |         |          |          |   |          |          |          |   |          |          |          |
| H                                                                                                                                                                                                                     | 0.09903                                                                                                                                                                                                                                                                                                                                                                                                                                                                                                                                                                                                                                                                                                                                                                                                                                                                                                                                                                                                                                                                                                                                                                                                                                                                                                                                                                                                                                                                                                                                                                                                                                                                                                                                                                                                                                                                                                                                                                                                                                                                                                                                                                                                                                                                                                                                                                                                                                                                                                                                                              | -1.33441 | -4.49279 |         |          |   |          |         |         |   |          |          |          |   |          |         |          |   |          |         |          |   |          |         |          |   |          |          |          |   |          |         |          |   |          |          |         |   |          |          |         |   |          |         |         |   |          |         |          |   |          |         |          |   |          |          |         |   |          |         |         |   |                                                                                                                                                                                                                                                                                                                                                                                                                                                                                                                                                                                                                                                                                                                                                                                                                                                                                                                                                                                                                                                                                                                            |         |         |          |          |          |         |          |          |          |         |         |          |         |          |          |          |         |          |          |          |         |          |         |          |         |          |         |          |          |          |          |          |          |          |          |          |          |          |         |          |          |          |          |          |          |          |         |          |         |          |         |          |          |          |          |         |          |          |         |         |          |         |   |         |         |          |                                                                                                                                                                                                                       |                                                                                                                                                                                                                                                                                                                                                                                                                                                                                                                                                                                                                                                                                                                                                                                                                                                                                                                                                                                                                                                                                                                                                                                                                                                                                                                                                                                                                                                                                                                                                                                                                                                                                                                                                                                                                                                                                                                                                                                                                                                                                                                                                                                                                                                                                                                                                              |         |          |          |         |          |          |         |         |         |         |                                                                                                                                                                                                                        |                                                                                                                                                                                                                                                                                                                                                                                                                                                                                                                                                                                                                                                                                                                                                                                                                                                                                                                                                                                                                                                                                                                                                                                                                                                                                                                                                                                                                                                                                                                                                                                                                                                                                                                                                                                                                                                                                                                                                                                                                                                                                                                                                                                                                                                                                                                                                                                                                                                                                                                                                                                      |   |          |          |          |   |          |          |          |   |          |         |          |   |         |          |          |   |          |         |          |   |          |          |          |   |         |          |          |   |          |         |         |   |          |          |         |   |          |          |         |   |          |         |          |   |          |          |          |   |          |          |         |   |          |          |          |   |          |          |          |   |          |          |         |   |          |          |         |   |          |          |          |   |          |          |          |   |          |          |          |   |          |          |          |   |          |          |          |   |          |          |          |   |          |          |         |   |         |          |          |   |          |         |         |   |          |         |         |   |         |          |          |   |         |          |          |   |         |          |          |   |         |          |          |   |          |          |          |   |         |          |          |   |          |          |          |   |          |          |          |
| H                                                                                                                                                                                                                     | -1.56410                                                                                                                                                                                                                                                                                                                                                                                                                                                                                                                                                                                                                                                                                                                                                                                                                                                                                                                                                                                                                                                                                                                                                                                                                                                                                                                                                                                                                                                                                                                                                                                                                                                                                                                                                                                                                                                                                                                                                                                                                                                                                                                                                                                                                                                                                                                                                                                                                                                                                                                                                             | -1.13021 | -3.91586 |         |          |   |          |         |         |   |          |          |          |   |          |         |          |   |          |         |          |   |          |         |          |   |          |          |          |   |          |         |          |   |          |          |         |   |          |          |         |   |          |         |         |   |          |         |          |   |          |         |          |   |          |          |         |   |          |         |         |   |                                                                                                                                                                                                                                                                                                                                                                                                                                                                                                                                                                                                                                                                                                                                                                                                                                                                                                                                                                                                                                                                                                                            |         |         |          |          |          |         |          |          |          |         |         |          |         |          |          |          |         |          |          |          |         |          |         |          |         |          |         |          |          |          |          |          |          |          |          |          |          |          |         |          |          |          |          |          |          |          |         |          |         |          |         |          |          |          |          |         |          |          |         |         |          |         |   |         |         |          |                                                                                                                                                                                                                       |                                                                                                                                                                                                                                                                                                                                                                                                                                                                                                                                                                                                                                                                                                                                                                                                                                                                                                                                                                                                                                                                                                                                                                                                                                                                                                                                                                                                                                                                                                                                                                                                                                                                                                                                                                                                                                                                                                                                                                                                                                                                                                                                                                                                                                                                                                                                                              |         |          |          |         |          |          |         |         |         |         |                                                                                                                                                                                                                        |                                                                                                                                                                                                                                                                                                                                                                                                                                                                                                                                                                                                                                                                                                                                                                                                                                                                                                                                                                                                                                                                                                                                                                                                                                                                                                                                                                                                                                                                                                                                                                                                                                                                                                                                                                                                                                                                                                                                                                                                                                                                                                                                                                                                                                                                                                                                                                                                                                                                                                                                                                                      |   |          |          |          |   |          |          |          |   |          |         |          |   |         |          |          |   |          |         |          |   |          |          |          |   |         |          |          |   |          |         |         |   |          |          |         |   |          |          |         |   |          |         |          |   |          |          |          |   |          |          |         |   |          |          |          |   |          |          |          |   |          |          |         |   |          |          |         |   |          |          |          |   |          |          |          |   |          |          |          |   |          |          |          |   |          |          |          |   |          |          |          |   |          |          |         |   |         |          |          |   |          |         |         |   |          |         |         |   |         |          |          |   |         |          |          |   |         |          |          |   |         |          |          |   |          |          |          |   |         |          |          |   |          |          |          |   |          |          |          |
| H                                                                                                                                                                                                                     | -0.78526                                                                                                                                                                                                                                                                                                                                                                                                                                                                                                                                                                                                                                                                                                                                                                                                                                                                                                                                                                                                                                                                                                                                                                                                                                                                                                                                                                                                                                                                                                                                                                                                                                                                                                                                                                                                                                                                                                                                                                                                                                                                                                                                                                                                                                                                                                                                                                                                                                                                                                                                                             | -2.72120 | -3.87284 |         |          |   |          |         |         |   |          |          |          |   |          |         |          |   |          |         |          |   |          |         |          |   |          |          |          |   |          |         |          |   |          |          |         |   |          |          |         |   |          |         |         |   |          |         |          |   |          |         |          |   |          |          |         |   |          |         |         |   |                                                                                                                                                                                                                                                                                                                                                                                                                                                                                                                                                                                                                                                                                                                                                                                                                                                                                                                                                                                                                                                                                                                            |         |         |          |          |          |         |          |          |          |         |         |          |         |          |          |          |         |          |          |          |         |          |         |          |         |          |         |          |          |          |          |          |          |          |          |          |          |          |         |          |          |          |          |          |          |          |         |          |         |          |         |          |          |          |          |         |          |          |         |         |          |         |   |         |         |          |                                                                                                                                                                                                                       |                                                                                                                                                                                                                                                                                                                                                                                                                                                                                                                                                                                                                                                                                                                                                                                                                                                                                                                                                                                                                                                                                                                                                                                                                                                                                                                                                                                                                                                                                                                                                                                                                                                                                                                                                                                                                                                                                                                                                                                                                                                                                                                                                                                                                                                                                                                                                              |         |          |          |         |          |          |         |         |         |         |                                                                                                                                                                                                                        |                                                                                                                                                                                                                                                                                                                                                                                                                                                                                                                                                                                                                                                                                                                                                                                                                                                                                                                                                                                                                                                                                                                                                                                                                                                                                                                                                                                                                                                                                                                                                                                                                                                                                                                                                                                                                                                                                                                                                                                                                                                                                                                                                                                                                                                                                                                                                                                                                                                                                                                                                                                      |   |          |          |          |   |          |          |          |   |          |         |          |   |         |          |          |   |          |         |          |   |          |          |          |   |         |          |          |   |          |         |         |   |          |          |         |   |          |          |         |   |          |         |          |   |          |          |          |   |          |          |         |   |          |          |          |   |          |          |          |   |          |          |         |   |          |          |         |   |          |          |          |   |          |          |          |   |          |          |          |   |          |          |          |   |          |          |          |   |          |          |          |   |          |          |         |   |         |          |          |   |          |         |         |   |          |         |         |   |         |          |          |   |         |          |          |   |         |          |          |   |         |          |          |   |          |          |          |   |         |          |          |   |          |          |          |   |          |          |          |
|                                                                                                                                                                                                                       | <table border="1"> <tbody> <tr><td>C</td><td>-0.79236</td><td>5.22508</td><td>-1.37382</td></tr> <tr><td>C</td><td>-0.45264</td><td>3.17560</td><td>0.51738</td></tr> <tr><td>C</td><td>-1.81018</td><td>4.90752</td><td>-0.48071</td></tr> <tr><td>C</td><td>0.41290</td><td>4.52294</td><td>-1.31886</td></tr> <tr><td>C</td><td>0.56630</td><td>3.51666</td><td>-0.38404</td></tr> <tr><td>C</td><td>-1.65549</td><td>3.89141</td><td>0.46890</td></tr> <tr><td>H</td><td>-2.74103</td><td>5.45448</td><td>-0.50134</td></tr> <tr><td>H</td><td>1.49523</td><td>2.96190</td><td>-0.34903</td></tr> <tr><td>C</td><td>-0.18679</td><td>2.09066</td><td>1.49659</td></tr> <tr><td>C</td><td>0.41059</td><td>0.04234</td><td>3.33521</td></tr> <tr><td>C</td><td>-0.94120</td><td>0.89820</td><td>1.52543</td></tr> <tr><td>C</td><td>0.86591</td><td>2.19882</td><td>2.39542</td></tr> <tr><td>C</td><td>1.18170</td><td>1.19943</td><td>3.31659</td></tr> <tr><td>C</td><td>-0.65050</td><td>-0.10869</td><td>2.43701</td></tr> <tr><td>H</td><td>1.45658</td><td>3.10586</td><td>2.38159</td></tr> </tbody> </table>                                                                                                                                                                                                                                                                                                                                                                                                                                                                                                                                                                                                                                                                                                                                                                                                                                                                                                                                                                                                                                                                                                                                                                                                                                                                                                                                                                                                                                              | C        | -0.79236 | 5.22508 | -1.37382 | C | -0.45264 | 3.17560 | 0.51738 | C | -1.81018 | 4.90752  | -0.48071 | C | 0.41290  | 4.52294 | -1.31886 | C | 0.56630  | 3.51666 | -0.38404 | C | -1.65549 | 3.89141 | 0.46890  | H | -2.74103 | 5.45448  | -0.50134 | H | 1.49523  | 2.96190 | -0.34903 | C | -0.18679 | 2.09066  | 1.49659 | C | 0.41059  | 0.04234  | 3.33521 | C | -0.94120 | 0.89820 | 1.52543 | C | 0.86591  | 2.19882 | 2.39542  | C | 1.18170  | 1.19943 | 3.31659  | C | -0.65050 | -0.10869 | 2.43701 | H | 1.45658  | 3.10586 | 2.38159 |   | <table border="1"> <tbody> <tr><td>C</td><td>0.04906</td><td>-0.41698</td><td>-3.57024</td></tr> <tr><td>C</td><td>0.07456</td><td>-0.10472</td><td>-0.71462</td></tr> <tr><td>C</td><td>0.09517</td><td>0.83646</td><td>-2.97086</td></tr> <tr><td>C</td><td>0.03730</td><td>-1.52995</td><td>-2.74977</td></tr> <tr><td>C</td><td>0.05154</td><td>-1.34840</td><td>-1.37355</td></tr> <tr><td>C</td><td>0.11670</td><td>1.04001</td><td>-1.59433</td></tr> <tr><td>H</td><td>0.12029</td><td>1.67942</td><td>-3.64271</td></tr> <tr><td>H</td><td>0.04353</td><td>-2.24126</td><td>-0.78565</td></tr> <tr><td>C</td><td>0.06186</td><td>-0.09219</td><td>0.79836</td></tr> <tr><td>C</td><td>0.05877</td><td>0.05666</td><td>3.68827</td></tr> <tr><td>C</td><td>-0.00379</td><td>-1.25963</td><td>1.64238</td></tr> <tr><td>C</td><td>0.10613</td><td>1.09827</td><td>1.53794</td></tr> <tr><td>C</td><td>0.10901</td><td>1.20921</td><td>2.92481</td></tr> <tr><td>C</td><td>-0.00004</td><td>-1.16685</td><td>3.03033</td></tr> <tr><td>H</td><td>0.13519</td><td>2.03246</td><td>1.02747</td></tr> </tbody> </table> | C       | 0.04906 | -0.41698 | -3.57024 | C        | 0.07456 | -0.10472 | -0.71462 | C        | 0.09517 | 0.83646 | -2.97086 | C       | 0.03730  | -1.52995 | -2.74977 | C       | 0.05154  | -1.34840 | -1.37355 | C       | 0.11670  | 1.04001 | -1.59433 | H       | 0.12029  | 1.67942 | -3.64271 | H        | 0.04353  | -2.24126 | -0.78565 | C        | 0.06186  | -0.09219 | 0.79836  | C        | 0.05877  | 0.05666 | 3.68827  | C        | -0.00379 | -1.25963 | 1.64238  | C        | 0.10613  | 1.09827 | 1.53794  | C       | 0.10901  | 1.20921 | 2.92481  | C        | -0.00004 | -1.16685 | 3.03033 | H        | 0.13519  | 2.03246 | 1.02747 |          |         |   |         |         |          |                                                                                                                                                                                                                       |                                                                                                                                                                                                                                                                                                                                                                                                                                                                                                                                                                                                                                                                                                                                                                                                                                                                                                                                                                                                                                                                                                                                                                                                                                                                                                                                                                                                                                                                                                                                                                                                                                                                                                                                                                                                                                                                                                                                                                                                                                                                                                                                                                                                                                                                                                                                                              |         |          |          |         |          |          |         |         |         |         |                                                                                                                                                                                                                        |                                                                                                                                                                                                                                                                                                                                                                                                                                                                                                                                                                                                                                                                                                                                                                                                                                                                                                                                                                                                                                                                                                                                                                                                                                                                                                                                                                                                                                                                                                                                                                                                                                                                                                                                                                                                                                                                                                                                                                                                                                                                                                                                                                                                                                                                                                                                                                                                                                                                                                                                                                                      |   |          |          |          |   |          |          |          |   |          |         |          |   |         |          |          |   |          |         |          |   |          |          |          |   |         |          |          |   |          |         |         |   |          |          |         |   |          |          |         |   |          |         |          |   |          |          |          |   |          |          |         |   |          |          |          |   |          |          |          |   |          |          |         |   |          |          |         |   |          |          |          |   |          |          |          |   |          |          |          |   |          |          |          |   |          |          |          |   |          |          |          |   |          |          |         |   |         |          |          |   |          |         |         |   |          |         |         |   |         |          |          |   |         |          |          |   |         |          |          |   |         |          |          |   |          |          |          |   |         |          |          |   |          |          |          |   |          |          |          |
| C                                                                                                                                                                                                                     | -0.79236                                                                                                                                                                                                                                                                                                                                                                                                                                                                                                                                                                                                                                                                                                                                                                                                                                                                                                                                                                                                                                                                                                                                                                                                                                                                                                                                                                                                                                                                                                                                                                                                                                                                                                                                                                                                                                                                                                                                                                                                                                                                                                                                                                                                                                                                                                                                                                                                                                                                                                                                                             | 5.22508  | -1.37382 |         |          |   |          |         |         |   |          |          |          |   |          |         |          |   |          |         |          |   |          |         |          |   |          |          |          |   |          |         |          |   |          |          |         |   |          |          |         |   |          |         |         |   |          |         |          |   |          |         |          |   |          |          |         |   |          |         |         |   |                                                                                                                                                                                                                                                                                                                                                                                                                                                                                                                                                                                                                                                                                                                                                                                                                                                                                                                                                                                                                                                                                                                            |         |         |          |          |          |         |          |          |          |         |         |          |         |          |          |          |         |          |          |          |         |          |         |          |         |          |         |          |          |          |          |          |          |          |          |          |          |          |         |          |          |          |          |          |          |          |         |          |         |          |         |          |          |          |          |         |          |          |         |         |          |         |   |         |         |          |                                                                                                                                                                                                                       |                                                                                                                                                                                                                                                                                                                                                                                                                                                                                                                                                                                                                                                                                                                                                                                                                                                                                                                                                                                                                                                                                                                                                                                                                                                                                                                                                                                                                                                                                                                                                                                                                                                                                                                                                                                                                                                                                                                                                                                                                                                                                                                                                                                                                                                                                                                                                              |         |          |          |         |          |          |         |         |         |         |                                                                                                                                                                                                                        |                                                                                                                                                                                                                                                                                                                                                                                                                                                                                                                                                                                                                                                                                                                                                                                                                                                                                                                                                                                                                                                                                                                                                                                                                                                                                                                                                                                                                                                                                                                                                                                                                                                                                                                                                                                                                                                                                                                                                                                                                                                                                                                                                                                                                                                                                                                                                                                                                                                                                                                                                                                      |   |          |          |          |   |          |          |          |   |          |         |          |   |         |          |          |   |          |         |          |   |          |          |          |   |         |          |          |   |          |         |         |   |          |          |         |   |          |          |         |   |          |         |          |   |          |          |          |   |          |          |         |   |          |          |          |   |          |          |          |   |          |          |         |   |          |          |         |   |          |          |          |   |          |          |          |   |          |          |          |   |          |          |          |   |          |          |          |   |          |          |          |   |          |          |         |   |         |          |          |   |          |         |         |   |          |         |         |   |         |          |          |   |         |          |          |   |         |          |          |   |         |          |          |   |          |          |          |   |         |          |          |   |          |          |          |   |          |          |          |
| C                                                                                                                                                                                                                     | -0.45264                                                                                                                                                                                                                                                                                                                                                                                                                                                                                                                                                                                                                                                                                                                                                                                                                                                                                                                                                                                                                                                                                                                                                                                                                                                                                                                                                                                                                                                                                                                                                                                                                                                                                                                                                                                                                                                                                                                                                                                                                                                                                                                                                                                                                                                                                                                                                                                                                                                                                                                                                             | 3.17560  | 0.51738  |         |          |   |          |         |         |   |          |          |          |   |          |         |          |   |          |         |          |   |          |         |          |   |          |          |          |   |          |         |          |   |          |          |         |   |          |          |         |   |          |         |         |   |          |         |          |   |          |         |          |   |          |          |         |   |          |         |         |   |                                                                                                                                                                                                                                                                                                                                                                                                                                                                                                                                                                                                                                                                                                                                                                                                                                                                                                                                                                                                                                                                                                                            |         |         |          |          |          |         |          |          |          |         |         |          |         |          |          |          |         |          |          |          |         |          |         |          |         |          |         |          |          |          |          |          |          |          |          |          |          |          |         |          |          |          |          |          |          |          |         |          |         |          |         |          |          |          |          |         |          |          |         |         |          |         |   |         |         |          |                                                                                                                                                                                                                       |                                                                                                                                                                                                                                                                                                                                                                                                                                                                                                                                                                                                                                                                                                                                                                                                                                                                                                                                                                                                                                                                                                                                                                                                                                                                                                                                                                                                                                                                                                                                                                                                                                                                                                                                                                                                                                                                                                                                                                                                                                                                                                                                                                                                                                                                                                                                                              |         |          |          |         |          |          |         |         |         |         |                                                                                                                                                                                                                        |                                                                                                                                                                                                                                                                                                                                                                                                                                                                                                                                                                                                                                                                                                                                                                                                                                                                                                                                                                                                                                                                                                                                                                                                                                                                                                                                                                                                                                                                                                                                                                                                                                                                                                                                                                                                                                                                                                                                                                                                                                                                                                                                                                                                                                                                                                                                                                                                                                                                                                                                                                                      |   |          |          |          |   |          |          |          |   |          |         |          |   |         |          |          |   |          |         |          |   |          |          |          |   |         |          |          |   |          |         |         |   |          |          |         |   |          |          |         |   |          |         |          |   |          |          |          |   |          |          |         |   |          |          |          |   |          |          |          |   |          |          |         |   |          |          |         |   |          |          |          |   |          |          |          |   |          |          |          |   |          |          |          |   |          |          |          |   |          |          |          |   |          |          |         |   |         |          |          |   |          |         |         |   |          |         |         |   |         |          |          |   |         |          |          |   |         |          |          |   |         |          |          |   |          |          |          |   |         |          |          |   |          |          |          |   |          |          |          |
| C                                                                                                                                                                                                                     | -1.81018                                                                                                                                                                                                                                                                                                                                                                                                                                                                                                                                                                                                                                                                                                                                                                                                                                                                                                                                                                                                                                                                                                                                                                                                                                                                                                                                                                                                                                                                                                                                                                                                                                                                                                                                                                                                                                                                                                                                                                                                                                                                                                                                                                                                                                                                                                                                                                                                                                                                                                                                                             | 4.90752  | -0.48071 |         |          |   |          |         |         |   |          |          |          |   |          |         |          |   |          |         |          |   |          |         |          |   |          |          |          |   |          |         |          |   |          |          |         |   |          |          |         |   |          |         |         |   |          |         |          |   |          |         |          |   |          |          |         |   |          |         |         |   |                                                                                                                                                                                                                                                                                                                                                                                                                                                                                                                                                                                                                                                                                                                                                                                                                                                                                                                                                                                                                                                                                                                            |         |         |          |          |          |         |          |          |          |         |         |          |         |          |          |          |         |          |          |          |         |          |         |          |         |          |         |          |          |          |          |          |          |          |          |          |          |          |         |          |          |          |          |          |          |          |         |          |         |          |         |          |          |          |          |         |          |          |         |         |          |         |   |         |         |          |                                                                                                                                                                                                                       |                                                                                                                                                                                                                                                                                                                                                                                                                                                                                                                                                                                                                                                                                                                                                                                                                                                                                                                                                                                                                                                                                                                                                                                                                                                                                                                                                                                                                                                                                                                                                                                                                                                                                                                                                                                                                                                                                                                                                                                                                                                                                                                                                                                                                                                                                                                                                              |         |          |          |         |          |          |         |         |         |         |                                                                                                                                                                                                                        |                                                                                                                                                                                                                                                                                                                                                                                                                                                                                                                                                                                                                                                                                                                                                                                                                                                                                                                                                                                                                                                                                                                                                                                                                                                                                                                                                                                                                                                                                                                                                                                                                                                                                                                                                                                                                                                                                                                                                                                                                                                                                                                                                                                                                                                                                                                                                                                                                                                                                                                                                                                      |   |          |          |          |   |          |          |          |   |          |         |          |   |         |          |          |   |          |         |          |   |          |          |          |   |         |          |          |   |          |         |         |   |          |          |         |   |          |          |         |   |          |         |          |   |          |          |          |   |          |          |         |   |          |          |          |   |          |          |          |   |          |          |         |   |          |          |         |   |          |          |          |   |          |          |          |   |          |          |          |   |          |          |          |   |          |          |          |   |          |          |          |   |          |          |         |   |         |          |          |   |          |         |         |   |          |         |         |   |         |          |          |   |         |          |          |   |         |          |          |   |         |          |          |   |          |          |          |   |         |          |          |   |          |          |          |   |          |          |          |
| C                                                                                                                                                                                                                     | 0.41290                                                                                                                                                                                                                                                                                                                                                                                                                                                                                                                                                                                                                                                                                                                                                                                                                                                                                                                                                                                                                                                                                                                                                                                                                                                                                                                                                                                                                                                                                                                                                                                                                                                                                                                                                                                                                                                                                                                                                                                                                                                                                                                                                                                                                                                                                                                                                                                                                                                                                                                                                              | 4.52294  | -1.31886 |         |          |   |          |         |         |   |          |          |          |   |          |         |          |   |          |         |          |   |          |         |          |   |          |          |          |   |          |         |          |   |          |          |         |   |          |          |         |   |          |         |         |   |          |         |          |   |          |         |          |   |          |          |         |   |          |         |         |   |                                                                                                                                                                                                                                                                                                                                                                                                                                                                                                                                                                                                                                                                                                                                                                                                                                                                                                                                                                                                                                                                                                                            |         |         |          |          |          |         |          |          |          |         |         |          |         |          |          |          |         |          |          |          |         |          |         |          |         |          |         |          |          |          |          |          |          |          |          |          |          |          |         |          |          |          |          |          |          |          |         |          |         |          |         |          |          |          |          |         |          |          |         |         |          |         |   |         |         |          |                                                                                                                                                                                                                       |                                                                                                                                                                                                                                                                                                                                                                                                                                                                                                                                                                                                                                                                                                                                                                                                                                                                                                                                                                                                                                                                                                                                                                                                                                                                                                                                                                                                                                                                                                                                                                                                                                                                                                                                                                                                                                                                                                                                                                                                                                                                                                                                                                                                                                                                                                                                                              |         |          |          |         |          |          |         |         |         |         |                                                                                                                                                                                                                        |                                                                                                                                                                                                                                                                                                                                                                                                                                                                                                                                                                                                                                                                                                                                                                                                                                                                                                                                                                                                                                                                                                                                                                                                                                                                                                                                                                                                                                                                                                                                                                                                                                                                                                                                                                                                                                                                                                                                                                                                                                                                                                                                                                                                                                                                                                                                                                                                                                                                                                                                                                                      |   |          |          |          |   |          |          |          |   |          |         |          |   |         |          |          |   |          |         |          |   |          |          |          |   |         |          |          |   |          |         |         |   |          |          |         |   |          |          |         |   |          |         |          |   |          |          |          |   |          |          |         |   |          |          |          |   |          |          |          |   |          |          |         |   |          |          |         |   |          |          |          |   |          |          |          |   |          |          |          |   |          |          |          |   |          |          |          |   |          |          |          |   |          |          |         |   |         |          |          |   |          |         |         |   |          |         |         |   |         |          |          |   |         |          |          |   |         |          |          |   |         |          |          |   |          |          |          |   |         |          |          |   |          |          |          |   |          |          |          |
| C                                                                                                                                                                                                                     | 0.56630                                                                                                                                                                                                                                                                                                                                                                                                                                                                                                                                                                                                                                                                                                                                                                                                                                                                                                                                                                                                                                                                                                                                                                                                                                                                                                                                                                                                                                                                                                                                                                                                                                                                                                                                                                                                                                                                                                                                                                                                                                                                                                                                                                                                                                                                                                                                                                                                                                                                                                                                                              | 3.51666  | -0.38404 |         |          |   |          |         |         |   |          |          |          |   |          |         |          |   |          |         |          |   |          |         |          |   |          |          |          |   |          |         |          |   |          |          |         |   |          |          |         |   |          |         |         |   |          |         |          |   |          |         |          |   |          |          |         |   |          |         |         |   |                                                                                                                                                                                                                                                                                                                                                                                                                                                                                                                                                                                                                                                                                                                                                                                                                                                                                                                                                                                                                                                                                                                            |         |         |          |          |          |         |          |          |          |         |         |          |         |          |          |          |         |          |          |          |         |          |         |          |         |          |         |          |          |          |          |          |          |          |          |          |          |          |         |          |          |          |          |          |          |          |         |          |         |          |         |          |          |          |          |         |          |          |         |         |          |         |   |         |         |          |                                                                                                                                                                                                                       |                                                                                                                                                                                                                                                                                                                                                                                                                                                                                                                                                                                                                                                                                                                                                                                                                                                                                                                                                                                                                                                                                                                                                                                                                                                                                                                                                                                                                                                                                                                                                                                                                                                                                                                                                                                                                                                                                                                                                                                                                                                                                                                                                                                                                                                                                                                                                              |         |          |          |         |          |          |         |         |         |         |                                                                                                                                                                                                                        |                                                                                                                                                                                                                                                                                                                                                                                                                                                                                                                                                                                                                                                                                                                                                                                                                                                                                                                                                                                                                                                                                                                                                                                                                                                                                                                                                                                                                                                                                                                                                                                                                                                                                                                                                                                                                                                                                                                                                                                                                                                                                                                                                                                                                                                                                                                                                                                                                                                                                                                                                                                      |   |          |          |          |   |          |          |          |   |          |         |          |   |         |          |          |   |          |         |          |   |          |          |          |   |         |          |          |   |          |         |         |   |          |          |         |   |          |          |         |   |          |         |          |   |          |          |          |   |          |          |         |   |          |          |          |   |          |          |          |   |          |          |         |   |          |          |         |   |          |          |          |   |          |          |          |   |          |          |          |   |          |          |          |   |          |          |          |   |          |          |          |   |          |          |         |   |         |          |          |   |          |         |         |   |          |         |         |   |         |          |          |   |         |          |          |   |         |          |          |   |         |          |          |   |          |          |          |   |         |          |          |   |          |          |          |   |          |          |          |
| C                                                                                                                                                                                                                     | -1.65549                                                                                                                                                                                                                                                                                                                                                                                                                                                                                                                                                                                                                                                                                                                                                                                                                                                                                                                                                                                                                                                                                                                                                                                                                                                                                                                                                                                                                                                                                                                                                                                                                                                                                                                                                                                                                                                                                                                                                                                                                                                                                                                                                                                                                                                                                                                                                                                                                                                                                                                                                             | 3.89141  | 0.46890  |         |          |   |          |         |         |   |          |          |          |   |          |         |          |   |          |         |          |   |          |         |          |   |          |          |          |   |          |         |          |   |          |          |         |   |          |          |         |   |          |         |         |   |          |         |          |   |          |         |          |   |          |          |         |   |          |         |         |   |                                                                                                                                                                                                                                                                                                                                                                                                                                                                                                                                                                                                                                                                                                                                                                                                                                                                                                                                                                                                                                                                                                                            |         |         |          |          |          |         |          |          |          |         |         |          |         |          |          |          |         |          |          |          |         |          |         |          |         |          |         |          |          |          |          |          |          |          |          |          |          |          |         |          |          |          |          |          |          |          |         |          |         |          |         |          |          |          |          |         |          |          |         |         |          |         |   |         |         |          |                                                                                                                                                                                                                       |                                                                                                                                                                                                                                                                                                                                                                                                                                                                                                                                                                                                                                                                                                                                                                                                                                                                                                                                                                                                                                                                                                                                                                                                                                                                                                                                                                                                                                                                                                                                                                                                                                                                                                                                                                                                                                                                                                                                                                                                                                                                                                                                                                                                                                                                                                                                                              |         |          |          |         |          |          |         |         |         |         |                                                                                                                                                                                                                        |                                                                                                                                                                                                                                                                                                                                                                                                                                                                                                                                                                                                                                                                                                                                                                                                                                                                                                                                                                                                                                                                                                                                                                                                                                                                                                                                                                                                                                                                                                                                                                                                                                                                                                                                                                                                                                                                                                                                                                                                                                                                                                                                                                                                                                                                                                                                                                                                                                                                                                                                                                                      |   |          |          |          |   |          |          |          |   |          |         |          |   |         |          |          |   |          |         |          |   |          |          |          |   |         |          |          |   |          |         |         |   |          |          |         |   |          |          |         |   |          |         |          |   |          |          |          |   |          |          |         |   |          |          |          |   |          |          |          |   |          |          |         |   |          |          |         |   |          |          |          |   |          |          |          |   |          |          |          |   |          |          |          |   |          |          |          |   |          |          |          |   |          |          |         |   |         |          |          |   |          |         |         |   |          |         |         |   |         |          |          |   |         |          |          |   |         |          |          |   |         |          |          |   |          |          |          |   |         |          |          |   |          |          |          |   |          |          |          |
| H                                                                                                                                                                                                                     | -2.74103                                                                                                                                                                                                                                                                                                                                                                                                                                                                                                                                                                                                                                                                                                                                                                                                                                                                                                                                                                                                                                                                                                                                                                                                                                                                                                                                                                                                                                                                                                                                                                                                                                                                                                                                                                                                                                                                                                                                                                                                                                                                                                                                                                                                                                                                                                                                                                                                                                                                                                                                                             | 5.45448  | -0.50134 |         |          |   |          |         |         |   |          |          |          |   |          |         |          |   |          |         |          |   |          |         |          |   |          |          |          |   |          |         |          |   |          |          |         |   |          |          |         |   |          |         |         |   |          |         |          |   |          |         |          |   |          |          |         |   |          |         |         |   |                                                                                                                                                                                                                                                                                                                                                                                                                                                                                                                                                                                                                                                                                                                                                                                                                                                                                                                                                                                                                                                                                                                            |         |         |          |          |          |         |          |          |          |         |         |          |         |          |          |          |         |          |          |          |         |          |         |          |         |          |         |          |          |          |          |          |          |          |          |          |          |          |         |          |          |          |          |          |          |          |         |          |         |          |         |          |          |          |          |         |          |          |         |         |          |         |   |         |         |          |                                                                                                                                                                                                                       |                                                                                                                                                                                                                                                                                                                                                                                                                                                                                                                                                                                                                                                                                                                                                                                                                                                                                                                                                                                                                                                                                                                                                                                                                                                                                                                                                                                                                                                                                                                                                                                                                                                                                                                                                                                                                                                                                                                                                                                                                                                                                                                                                                                                                                                                                                                                                              |         |          |          |         |          |          |         |         |         |         |                                                                                                                                                                                                                        |                                                                                                                                                                                                                                                                                                                                                                                                                                                                                                                                                                                                                                                                                                                                                                                                                                                                                                                                                                                                                                                                                                                                                                                                                                                                                                                                                                                                                                                                                                                                                                                                                                                                                                                                                                                                                                                                                                                                                                                                                                                                                                                                                                                                                                                                                                                                                                                                                                                                                                                                                                                      |   |          |          |          |   |          |          |          |   |          |         |          |   |         |          |          |   |          |         |          |   |          |          |          |   |         |          |          |   |          |         |         |   |          |          |         |   |          |          |         |   |          |         |          |   |          |          |          |   |          |          |         |   |          |          |          |   |          |          |          |   |          |          |         |   |          |          |         |   |          |          |          |   |          |          |          |   |          |          |          |   |          |          |          |   |          |          |          |   |          |          |          |   |          |          |         |   |         |          |          |   |          |         |         |   |          |         |         |   |         |          |          |   |         |          |          |   |         |          |          |   |         |          |          |   |          |          |          |   |         |          |          |   |          |          |          |   |          |          |          |
| H                                                                                                                                                                                                                     | 1.49523                                                                                                                                                                                                                                                                                                                                                                                                                                                                                                                                                                                                                                                                                                                                                                                                                                                                                                                                                                                                                                                                                                                                                                                                                                                                                                                                                                                                                                                                                                                                                                                                                                                                                                                                                                                                                                                                                                                                                                                                                                                                                                                                                                                                                                                                                                                                                                                                                                                                                                                                                              | 2.96190  | -0.34903 |         |          |   |          |         |         |   |          |          |          |   |          |         |          |   |          |         |          |   |          |         |          |   |          |          |          |   |          |         |          |   |          |          |         |   |          |          |         |   |          |         |         |   |          |         |          |   |          |         |          |   |          |          |         |   |          |         |         |   |                                                                                                                                                                                                                                                                                                                                                                                                                                                                                                                                                                                                                                                                                                                                                                                                                                                                                                                                                                                                                                                                                                                            |         |         |          |          |          |         |          |          |          |         |         |          |         |          |          |          |         |          |          |          |         |          |         |          |         |          |         |          |          |          |          |          |          |          |          |          |          |          |         |          |          |          |          |          |          |          |         |          |         |          |         |          |          |          |          |         |          |          |         |         |          |         |   |         |         |          |                                                                                                                                                                                                                       |                                                                                                                                                                                                                                                                                                                                                                                                                                                                                                                                                                                                                                                                                                                                                                                                                                                                                                                                                                                                                                                                                                                                                                                                                                                                                                                                                                                                                                                                                                                                                                                                                                                                                                                                                                                                                                                                                                                                                                                                                                                                                                                                                                                                                                                                                                                                                              |         |          |          |         |          |          |         |         |         |         |                                                                                                                                                                                                                        |                                                                                                                                                                                                                                                                                                                                                                                                                                                                                                                                                                                                                                                                                                                                                                                                                                                                                                                                                                                                                                                                                                                                                                                                                                                                                                                                                                                                                                                                                                                                                                                                                                                                                                                                                                                                                                                                                                                                                                                                                                                                                                                                                                                                                                                                                                                                                                                                                                                                                                                                                                                      |   |          |          |          |   |          |          |          |   |          |         |          |   |         |          |          |   |          |         |          |   |          |          |          |   |         |          |          |   |          |         |         |   |          |          |         |   |          |          |         |   |          |         |          |   |          |          |          |   |          |          |         |   |          |          |          |   |          |          |          |   |          |          |         |   |          |          |         |   |          |          |          |   |          |          |          |   |          |          |          |   |          |          |          |   |          |          |          |   |          |          |          |   |          |          |         |   |         |          |          |   |          |         |         |   |          |         |         |   |         |          |          |   |         |          |          |   |         |          |          |   |         |          |          |   |          |          |          |   |         |          |          |   |          |          |          |   |          |          |          |
| C                                                                                                                                                                                                                     | -0.18679                                                                                                                                                                                                                                                                                                                                                                                                                                                                                                                                                                                                                                                                                                                                                                                                                                                                                                                                                                                                                                                                                                                                                                                                                                                                                                                                                                                                                                                                                                                                                                                                                                                                                                                                                                                                                                                                                                                                                                                                                                                                                                                                                                                                                                                                                                                                                                                                                                                                                                                                                             | 2.09066  | 1.49659  |         |          |   |          |         |         |   |          |          |          |   |          |         |          |   |          |         |          |   |          |         |          |   |          |          |          |   |          |         |          |   |          |          |         |   |          |          |         |   |          |         |         |   |          |         |          |   |          |         |          |   |          |          |         |   |          |         |         |   |                                                                                                                                                                                                                                                                                                                                                                                                                                                                                                                                                                                                                                                                                                                                                                                                                                                                                                                                                                                                                                                                                                                            |         |         |          |          |          |         |          |          |          |         |         |          |         |          |          |          |         |          |          |          |         |          |         |          |         |          |         |          |          |          |          |          |          |          |          |          |          |          |         |          |          |          |          |          |          |          |         |          |         |          |         |          |          |          |          |         |          |          |         |         |          |         |   |         |         |          |                                                                                                                                                                                                                       |                                                                                                                                                                                                                                                                                                                                                                                                                                                                                                                                                                                                                                                                                                                                                                                                                                                                                                                                                                                                                                                                                                                                                                                                                                                                                                                                                                                                                                                                                                                                                                                                                                                                                                                                                                                                                                                                                                                                                                                                                                                                                                                                                                                                                                                                                                                                                              |         |          |          |         |          |          |         |         |         |         |                                                                                                                                                                                                                        |                                                                                                                                                                                                                                                                                                                                                                                                                                                                                                                                                                                                                                                                                                                                                                                                                                                                                                                                                                                                                                                                                                                                                                                                                                                                                                                                                                                                                                                                                                                                                                                                                                                                                                                                                                                                                                                                                                                                                                                                                                                                                                                                                                                                                                                                                                                                                                                                                                                                                                                                                                                      |   |          |          |          |   |          |          |          |   |          |         |          |   |         |          |          |   |          |         |          |   |          |          |          |   |         |          |          |   |          |         |         |   |          |          |         |   |          |          |         |   |          |         |          |   |          |          |          |   |          |          |         |   |          |          |          |   |          |          |          |   |          |          |         |   |          |          |         |   |          |          |          |   |          |          |          |   |          |          |          |   |          |          |          |   |          |          |          |   |          |          |          |   |          |          |         |   |         |          |          |   |          |         |         |   |          |         |         |   |         |          |          |   |         |          |          |   |         |          |          |   |         |          |          |   |          |          |          |   |         |          |          |   |          |          |          |   |          |          |          |
| C                                                                                                                                                                                                                     | 0.41059                                                                                                                                                                                                                                                                                                                                                                                                                                                                                                                                                                                                                                                                                                                                                                                                                                                                                                                                                                                                                                                                                                                                                                                                                                                                                                                                                                                                                                                                                                                                                                                                                                                                                                                                                                                                                                                                                                                                                                                                                                                                                                                                                                                                                                                                                                                                                                                                                                                                                                                                                              | 0.04234  | 3.33521  |         |          |   |          |         |         |   |          |          |          |   |          |         |          |   |          |         |          |   |          |         |          |   |          |          |          |   |          |         |          |   |          |          |         |   |          |          |         |   |          |         |         |   |          |         |          |   |          |         |          |   |          |          |         |   |          |         |         |   |                                                                                                                                                                                                                                                                                                                                                                                                                                                                                                                                                                                                                                                                                                                                                                                                                                                                                                                                                                                                                                                                                                                            |         |         |          |          |          |         |          |          |          |         |         |          |         |          |          |          |         |          |          |          |         |          |         |          |         |          |         |          |          |          |          |          |          |          |          |          |          |          |         |          |          |          |          |          |          |          |         |          |         |          |         |          |          |          |          |         |          |          |         |         |          |         |   |         |         |          |                                                                                                                                                                                                                       |                                                                                                                                                                                                                                                                                                                                                                                                                                                                                                                                                                                                                                                                                                                                                                                                                                                                                                                                                                                                                                                                                                                                                                                                                                                                                                                                                                                                                                                                                                                                                                                                                                                                                                                                                                                                                                                                                                                                                                                                                                                                                                                                                                                                                                                                                                                                                              |         |          |          |         |          |          |         |         |         |         |                                                                                                                                                                                                                        |                                                                                                                                                                                                                                                                                                                                                                                                                                                                                                                                                                                                                                                                                                                                                                                                                                                                                                                                                                                                                                                                                                                                                                                                                                                                                                                                                                                                                                                                                                                                                                                                                                                                                                                                                                                                                                                                                                                                                                                                                                                                                                                                                                                                                                                                                                                                                                                                                                                                                                                                                                                      |   |          |          |          |   |          |          |          |   |          |         |          |   |         |          |          |   |          |         |          |   |          |          |          |   |         |          |          |   |          |         |         |   |          |          |         |   |          |          |         |   |          |         |          |   |          |          |          |   |          |          |         |   |          |          |          |   |          |          |          |   |          |          |         |   |          |          |         |   |          |          |          |   |          |          |          |   |          |          |          |   |          |          |          |   |          |          |          |   |          |          |          |   |          |          |         |   |         |          |          |   |          |         |         |   |          |         |         |   |         |          |          |   |         |          |          |   |         |          |          |   |         |          |          |   |          |          |          |   |         |          |          |   |          |          |          |   |          |          |          |
| C                                                                                                                                                                                                                     | -0.94120                                                                                                                                                                                                                                                                                                                                                                                                                                                                                                                                                                                                                                                                                                                                                                                                                                                                                                                                                                                                                                                                                                                                                                                                                                                                                                                                                                                                                                                                                                                                                                                                                                                                                                                                                                                                                                                                                                                                                                                                                                                                                                                                                                                                                                                                                                                                                                                                                                                                                                                                                             | 0.89820  | 1.52543  |         |          |   |          |         |         |   |          |          |          |   |          |         |          |   |          |         |          |   |          |         |          |   |          |          |          |   |          |         |          |   |          |          |         |   |          |          |         |   |          |         |         |   |          |         |          |   |          |         |          |   |          |          |         |   |          |         |         |   |                                                                                                                                                                                                                                                                                                                                                                                                                                                                                                                                                                                                                                                                                                                                                                                                                                                                                                                                                                                                                                                                                                                            |         |         |          |          |          |         |          |          |          |         |         |          |         |          |          |          |         |          |          |          |         |          |         |          |         |          |         |          |          |          |          |          |          |          |          |          |          |          |         |          |          |          |          |          |          |          |         |          |         |          |         |          |          |          |          |         |          |          |         |         |          |         |   |         |         |          |                                                                                                                                                                                                                       |                                                                                                                                                                                                                                                                                                                                                                                                                                                                                                                                                                                                                                                                                                                                                                                                                                                                                                                                                                                                                                                                                                                                                                                                                                                                                                                                                                                                                                                                                                                                                                                                                                                                                                                                                                                                                                                                                                                                                                                                                                                                                                                                                                                                                                                                                                                                                              |         |          |          |         |          |          |         |         |         |         |                                                                                                                                                                                                                        |                                                                                                                                                                                                                                                                                                                                                                                                                                                                                                                                                                                                                                                                                                                                                                                                                                                                                                                                                                                                                                                                                                                                                                                                                                                                                                                                                                                                                                                                                                                                                                                                                                                                                                                                                                                                                                                                                                                                                                                                                                                                                                                                                                                                                                                                                                                                                                                                                                                                                                                                                                                      |   |          |          |          |   |          |          |          |   |          |         |          |   |         |          |          |   |          |         |          |   |          |          |          |   |         |          |          |   |          |         |         |   |          |          |         |   |          |          |         |   |          |         |          |   |          |          |          |   |          |          |         |   |          |          |          |   |          |          |          |   |          |          |         |   |          |          |         |   |          |          |          |   |          |          |          |   |          |          |          |   |          |          |          |   |          |          |          |   |          |          |          |   |          |          |         |   |         |          |          |   |          |         |         |   |          |         |         |   |         |          |          |   |         |          |          |   |         |          |          |   |         |          |          |   |          |          |          |   |         |          |          |   |          |          |          |   |          |          |          |
| C                                                                                                                                                                                                                     | 0.86591                                                                                                                                                                                                                                                                                                                                                                                                                                                                                                                                                                                                                                                                                                                                                                                                                                                                                                                                                                                                                                                                                                                                                                                                                                                                                                                                                                                                                                                                                                                                                                                                                                                                                                                                                                                                                                                                                                                                                                                                                                                                                                                                                                                                                                                                                                                                                                                                                                                                                                                                                              | 2.19882  | 2.39542  |         |          |   |          |         |         |   |          |          |          |   |          |         |          |   |          |         |          |   |          |         |          |   |          |          |          |   |          |         |          |   |          |          |         |   |          |          |         |   |          |         |         |   |          |         |          |   |          |         |          |   |          |          |         |   |          |         |         |   |                                                                                                                                                                                                                                                                                                                                                                                                                                                                                                                                                                                                                                                                                                                                                                                                                                                                                                                                                                                                                                                                                                                            |         |         |          |          |          |         |          |          |          |         |         |          |         |          |          |          |         |          |          |          |         |          |         |          |         |          |         |          |          |          |          |          |          |          |          |          |          |          |         |          |          |          |          |          |          |          |         |          |         |          |         |          |          |          |          |         |          |          |         |         |          |         |   |         |         |          |                                                                                                                                                                                                                       |                                                                                                                                                                                                                                                                                                                                                                                                                                                                                                                                                                                                                                                                                                                                                                                                                                                                                                                                                                                                                                                                                                                                                                                                                                                                                                                                                                                                                                                                                                                                                                                                                                                                                                                                                                                                                                                                                                                                                                                                                                                                                                                                                                                                                                                                                                                                                              |         |          |          |         |          |          |         |         |         |         |                                                                                                                                                                                                                        |                                                                                                                                                                                                                                                                                                                                                                                                                                                                                                                                                                                                                                                                                                                                                                                                                                                                                                                                                                                                                                                                                                                                                                                                                                                                                                                                                                                                                                                                                                                                                                                                                                                                                                                                                                                                                                                                                                                                                                                                                                                                                                                                                                                                                                                                                                                                                                                                                                                                                                                                                                                      |   |          |          |          |   |          |          |          |   |          |         |          |   |         |          |          |   |          |         |          |   |          |          |          |   |         |          |          |   |          |         |         |   |          |          |         |   |          |          |         |   |          |         |          |   |          |          |          |   |          |          |         |   |          |          |          |   |          |          |          |   |          |          |         |   |          |          |         |   |          |          |          |   |          |          |          |   |          |          |          |   |          |          |          |   |          |          |          |   |          |          |          |   |          |          |         |   |         |          |          |   |          |         |         |   |          |         |         |   |         |          |          |   |         |          |          |   |         |          |          |   |         |          |          |   |          |          |          |   |         |          |          |   |          |          |          |   |          |          |          |
| C                                                                                                                                                                                                                     | 1.18170                                                                                                                                                                                                                                                                                                                                                                                                                                                                                                                                                                                                                                                                                                                                                                                                                                                                                                                                                                                                                                                                                                                                                                                                                                                                                                                                                                                                                                                                                                                                                                                                                                                                                                                                                                                                                                                                                                                                                                                                                                                                                                                                                                                                                                                                                                                                                                                                                                                                                                                                                              | 1.19943  | 3.31659  |         |          |   |          |         |         |   |          |          |          |   |          |         |          |   |          |         |          |   |          |         |          |   |          |          |          |   |          |         |          |   |          |          |         |   |          |          |         |   |          |         |         |   |          |         |          |   |          |         |          |   |          |          |         |   |          |         |         |   |                                                                                                                                                                                                                                                                                                                                                                                                                                                                                                                                                                                                                                                                                                                                                                                                                                                                                                                                                                                                                                                                                                                            |         |         |          |          |          |         |          |          |          |         |         |          |         |          |          |          |         |          |          |          |         |          |         |          |         |          |         |          |          |          |          |          |          |          |          |          |          |          |         |          |          |          |          |          |          |          |         |          |         |          |         |          |          |          |          |         |          |          |         |         |          |         |   |         |         |          |                                                                                                                                                                                                                       |                                                                                                                                                                                                                                                                                                                                                                                                                                                                                                                                                                                                                                                                                                                                                                                                                                                                                                                                                                                                                                                                                                                                                                                                                                                                                                                                                                                                                                                                                                                                                                                                                                                                                                                                                                                                                                                                                                                                                                                                                                                                                                                                                                                                                                                                                                                                                              |         |          |          |         |          |          |         |         |         |         |                                                                                                                                                                                                                        |                                                                                                                                                                                                                                                                                                                                                                                                                                                                                                                                                                                                                                                                                                                                                                                                                                                                                                                                                                                                                                                                                                                                                                                                                                                                                                                                                                                                                                                                                                                                                                                                                                                                                                                                                                                                                                                                                                                                                                                                                                                                                                                                                                                                                                                                                                                                                                                                                                                                                                                                                                                      |   |          |          |          |   |          |          |          |   |          |         |          |   |         |          |          |   |          |         |          |   |          |          |          |   |         |          |          |   |          |         |         |   |          |          |         |   |          |          |         |   |          |         |          |   |          |          |          |   |          |          |         |   |          |          |          |   |          |          |          |   |          |          |         |   |          |          |         |   |          |          |          |   |          |          |          |   |          |          |          |   |          |          |          |   |          |          |          |   |          |          |          |   |          |          |         |   |         |          |          |   |          |         |         |   |          |         |         |   |         |          |          |   |         |          |          |   |         |          |          |   |         |          |          |   |          |          |          |   |         |          |          |   |          |          |          |   |          |          |          |
| C                                                                                                                                                                                                                     | -0.65050                                                                                                                                                                                                                                                                                                                                                                                                                                                                                                                                                                                                                                                                                                                                                                                                                                                                                                                                                                                                                                                                                                                                                                                                                                                                                                                                                                                                                                                                                                                                                                                                                                                                                                                                                                                                                                                                                                                                                                                                                                                                                                                                                                                                                                                                                                                                                                                                                                                                                                                                                             | -0.10869 | 2.43701  |         |          |   |          |         |         |   |          |          |          |   |          |         |          |   |          |         |          |   |          |         |          |   |          |          |          |   |          |         |          |   |          |          |         |   |          |          |         |   |          |         |         |   |          |         |          |   |          |         |          |   |          |          |         |   |          |         |         |   |                                                                                                                                                                                                                                                                                                                                                                                                                                                                                                                                                                                                                                                                                                                                                                                                                                                                                                                                                                                                                                                                                                                            |         |         |          |          |          |         |          |          |          |         |         |          |         |          |          |          |         |          |          |          |         |          |         |          |         |          |         |          |          |          |          |          |          |          |          |          |          |          |         |          |          |          |          |          |          |          |         |          |         |          |         |          |          |          |          |         |          |          |         |         |          |         |   |         |         |          |                                                                                                                                                                                                                       |                                                                                                                                                                                                                                                                                                                                                                                                                                                                                                                                                                                                                                                                                                                                                                                                                                                                                                                                                                                                                                                                                                                                                                                                                                                                                                                                                                                                                                                                                                                                                                                                                                                                                                                                                                                                                                                                                                                                                                                                                                                                                                                                                                                                                                                                                                                                                              |         |          |          |         |          |          |         |         |         |         |                                                                                                                                                                                                                        |                                                                                                                                                                                                                                                                                                                                                                                                                                                                                                                                                                                                                                                                                                                                                                                                                                                                                                                                                                                                                                                                                                                                                                                                                                                                                                                                                                                                                                                                                                                                                                                                                                                                                                                                                                                                                                                                                                                                                                                                                                                                                                                                                                                                                                                                                                                                                                                                                                                                                                                                                                                      |   |          |          |          |   |          |          |          |   |          |         |          |   |         |          |          |   |          |         |          |   |          |          |          |   |         |          |          |   |          |         |         |   |          |          |         |   |          |          |         |   |          |         |          |   |          |          |          |   |          |          |         |   |          |          |          |   |          |          |          |   |          |          |         |   |          |          |         |   |          |          |          |   |          |          |          |   |          |          |          |   |          |          |          |   |          |          |          |   |          |          |          |   |          |          |         |   |         |          |          |   |          |         |         |   |          |         |         |   |         |          |          |   |         |          |          |   |         |          |          |   |         |          |          |   |          |          |          |   |         |          |          |   |          |          |          |   |          |          |          |
| H                                                                                                                                                                                                                     | 1.45658                                                                                                                                                                                                                                                                                                                                                                                                                                                                                                                                                                                                                                                                                                                                                                                                                                                                                                                                                                                                                                                                                                                                                                                                                                                                                                                                                                                                                                                                                                                                                                                                                                                                                                                                                                                                                                                                                                                                                                                                                                                                                                                                                                                                                                                                                                                                                                                                                                                                                                                                                              | 3.10586  | 2.38159  |         |          |   |          |         |         |   |          |          |          |   |          |         |          |   |          |         |          |   |          |         |          |   |          |          |          |   |          |         |          |   |          |          |         |   |          |          |         |   |          |         |         |   |          |         |          |   |          |         |          |   |          |          |         |   |          |         |         |   |                                                                                                                                                                                                                                                                                                                                                                                                                                                                                                                                                                                                                                                                                                                                                                                                                                                                                                                                                                                                                                                                                                                            |         |         |          |          |          |         |          |          |          |         |         |          |         |          |          |          |         |          |          |          |         |          |         |          |         |          |         |          |          |          |          |          |          |          |          |          |          |          |         |          |          |          |          |          |          |          |         |          |         |          |         |          |          |          |          |         |          |          |         |         |          |         |   |         |         |          |                                                                                                                                                                                                                       |                                                                                                                                                                                                                                                                                                                                                                                                                                                                                                                                                                                                                                                                                                                                                                                                                                                                                                                                                                                                                                                                                                                                                                                                                                                                                                                                                                                                                                                                                                                                                                                                                                                                                                                                                                                                                                                                                                                                                                                                                                                                                                                                                                                                                                                                                                                                                              |         |          |          |         |          |          |         |         |         |         |                                                                                                                                                                                                                        |                                                                                                                                                                                                                                                                                                                                                                                                                                                                                                                                                                                                                                                                                                                                                                                                                                                                                                                                                                                                                                                                                                                                                                                                                                                                                                                                                                                                                                                                                                                                                                                                                                                                                                                                                                                                                                                                                                                                                                                                                                                                                                                                                                                                                                                                                                                                                                                                                                                                                                                                                                                      |   |          |          |          |   |          |          |          |   |          |         |          |   |         |          |          |   |          |         |          |   |          |          |          |   |         |          |          |   |          |         |         |   |          |          |         |   |          |          |         |   |          |         |          |   |          |          |          |   |          |          |         |   |          |          |          |   |          |          |          |   |          |          |         |   |          |          |         |   |          |          |          |   |          |          |          |   |          |          |          |   |          |          |          |   |          |          |          |   |          |          |          |   |          |          |         |   |         |          |          |   |          |         |         |   |          |         |         |   |         |          |          |   |         |          |          |   |         |          |          |   |         |          |          |   |          |          |          |   |         |          |          |   |          |          |          |   |          |          |          |
| C                                                                                                                                                                                                                     | 0.04906                                                                                                                                                                                                                                                                                                                                                                                                                                                                                                                                                                                                                                                                                                                                                                                                                                                                                                                                                                                                                                                                                                                                                                                                                                                                                                                                                                                                                                                                                                                                                                                                                                                                                                                                                                                                                                                                                                                                                                                                                                                                                                                                                                                                                                                                                                                                                                                                                                                                                                                                                              | -0.41698 | -3.57024 |         |          |   |          |         |         |   |          |          |          |   |          |         |          |   |          |         |          |   |          |         |          |   |          |          |          |   |          |         |          |   |          |          |         |   |          |          |         |   |          |         |         |   |          |         |          |   |          |         |          |   |          |          |         |   |          |         |         |   |                                                                                                                                                                                                                                                                                                                                                                                                                                                                                                                                                                                                                                                                                                                                                                                                                                                                                                                                                                                                                                                                                                                            |         |         |          |          |          |         |          |          |          |         |         |          |         |          |          |          |         |          |          |          |         |          |         |          |         |          |         |          |          |          |          |          |          |          |          |          |          |          |         |          |          |          |          |          |          |          |         |          |         |          |         |          |          |          |          |         |          |          |         |         |          |         |   |         |         |          |                                                                                                                                                                                                                       |                                                                                                                                                                                                                                                                                                                                                                                                                                                                                                                                                                                                                                                                                                                                                                                                                                                                                                                                                                                                                                                                                                                                                                                                                                                                                                                                                                                                                                                                                                                                                                                                                                                                                                                                                                                                                                                                                                                                                                                                                                                                                                                                                                                                                                                                                                                                                              |         |          |          |         |          |          |         |         |         |         |                                                                                                                                                                                                                        |                                                                                                                                                                                                                                                                                                                                                                                                                                                                                                                                                                                                                                                                                                                                                                                                                                                                                                                                                                                                                                                                                                                                                                                                                                                                                                                                                                                                                                                                                                                                                                                                                                                                                                                                                                                                                                                                                                                                                                                                                                                                                                                                                                                                                                                                                                                                                                                                                                                                                                                                                                                      |   |          |          |          |   |          |          |          |   |          |         |          |   |         |          |          |   |          |         |          |   |          |          |          |   |         |          |          |   |          |         |         |   |          |          |         |   |          |          |         |   |          |         |          |   |          |          |          |   |          |          |         |   |          |          |          |   |          |          |          |   |          |          |         |   |          |          |         |   |          |          |          |   |          |          |          |   |          |          |          |   |          |          |          |   |          |          |          |   |          |          |          |   |          |          |         |   |         |          |          |   |          |         |         |   |          |         |         |   |         |          |          |   |         |          |          |   |         |          |          |   |         |          |          |   |          |          |          |   |         |          |          |   |          |          |          |   |          |          |          |
| C                                                                                                                                                                                                                     | 0.07456                                                                                                                                                                                                                                                                                                                                                                                                                                                                                                                                                                                                                                                                                                                                                                                                                                                                                                                                                                                                                                                                                                                                                                                                                                                                                                                                                                                                                                                                                                                                                                                                                                                                                                                                                                                                                                                                                                                                                                                                                                                                                                                                                                                                                                                                                                                                                                                                                                                                                                                                                              | -0.10472 | -0.71462 |         |          |   |          |         |         |   |          |          |          |   |          |         |          |   |          |         |          |   |          |         |          |   |          |          |          |   |          |         |          |   |          |          |         |   |          |          |         |   |          |         |         |   |          |         |          |   |          |         |          |   |          |          |         |   |          |         |         |   |                                                                                                                                                                                                                                                                                                                                                                                                                                                                                                                                                                                                                                                                                                                                                                                                                                                                                                                                                                                                                                                                                                                            |         |         |          |          |          |         |          |          |          |         |         |          |         |          |          |          |         |          |          |          |         |          |         |          |         |          |         |          |          |          |          |          |          |          |          |          |          |          |         |          |          |          |          |          |          |          |         |          |         |          |         |          |          |          |          |         |          |          |         |         |          |         |   |         |         |          |                                                                                                                                                                                                                       |                                                                                                                                                                                                                                                                                                                                                                                                                                                                                                                                                                                                                                                                                                                                                                                                                                                                                                                                                                                                                                                                                                                                                                                                                                                                                                                                                                                                                                                                                                                                                                                                                                                                                                                                                                                                                                                                                                                                                                                                                                                                                                                                                                                                                                                                                                                                                              |         |          |          |         |          |          |         |         |         |         |                                                                                                                                                                                                                        |                                                                                                                                                                                                                                                                                                                                                                                                                                                                                                                                                                                                                                                                                                                                                                                                                                                                                                                                                                                                                                                                                                                                                                                                                                                                                                                                                                                                                                                                                                                                                                                                                                                                                                                                                                                                                                                                                                                                                                                                                                                                                                                                                                                                                                                                                                                                                                                                                                                                                                                                                                                      |   |          |          |          |   |          |          |          |   |          |         |          |   |         |          |          |   |          |         |          |   |          |          |          |   |         |          |          |   |          |         |         |   |          |          |         |   |          |          |         |   |          |         |          |   |          |          |          |   |          |          |         |   |          |          |          |   |          |          |          |   |          |          |         |   |          |          |         |   |          |          |          |   |          |          |          |   |          |          |          |   |          |          |          |   |          |          |          |   |          |          |          |   |          |          |         |   |         |          |          |   |          |         |         |   |          |         |         |   |         |          |          |   |         |          |          |   |         |          |          |   |         |          |          |   |          |          |          |   |         |          |          |   |          |          |          |   |          |          |          |
| C                                                                                                                                                                                                                     | 0.09517                                                                                                                                                                                                                                                                                                                                                                                                                                                                                                                                                                                                                                                                                                                                                                                                                                                                                                                                                                                                                                                                                                                                                                                                                                                                                                                                                                                                                                                                                                                                                                                                                                                                                                                                                                                                                                                                                                                                                                                                                                                                                                                                                                                                                                                                                                                                                                                                                                                                                                                                                              | 0.83646  | -2.97086 |         |          |   |          |         |         |   |          |          |          |   |          |         |          |   |          |         |          |   |          |         |          |   |          |          |          |   |          |         |          |   |          |          |         |   |          |          |         |   |          |         |         |   |          |         |          |   |          |         |          |   |          |          |         |   |          |         |         |   |                                                                                                                                                                                                                                                                                                                                                                                                                                                                                                                                                                                                                                                                                                                                                                                                                                                                                                                                                                                                                                                                                                                            |         |         |          |          |          |         |          |          |          |         |         |          |         |          |          |          |         |          |          |          |         |          |         |          |         |          |         |          |          |          |          |          |          |          |          |          |          |          |         |          |          |          |          |          |          |          |         |          |         |          |         |          |          |          |          |         |          |          |         |         |          |         |   |         |         |          |                                                                                                                                                                                                                       |                                                                                                                                                                                                                                                                                                                                                                                                                                                                                                                                                                                                                                                                                                                                                                                                                                                                                                                                                                                                                                                                                                                                                                                                                                                                                                                                                                                                                                                                                                                                                                                                                                                                                                                                                                                                                                                                                                                                                                                                                                                                                                                                                                                                                                                                                                                                                              |         |          |          |         |          |          |         |         |         |         |                                                                                                                                                                                                                        |                                                                                                                                                                                                                                                                                                                                                                                                                                                                                                                                                                                                                                                                                                                                                                                                                                                                                                                                                                                                                                                                                                                                                                                                                                                                                                                                                                                                                                                                                                                                                                                                                                                                                                                                                                                                                                                                                                                                                                                                                                                                                                                                                                                                                                                                                                                                                                                                                                                                                                                                                                                      |   |          |          |          |   |          |          |          |   |          |         |          |   |         |          |          |   |          |         |          |   |          |          |          |   |         |          |          |   |          |         |         |   |          |          |         |   |          |          |         |   |          |         |          |   |          |          |          |   |          |          |         |   |          |          |          |   |          |          |          |   |          |          |         |   |          |          |         |   |          |          |          |   |          |          |          |   |          |          |          |   |          |          |          |   |          |          |          |   |          |          |          |   |          |          |         |   |         |          |          |   |          |         |         |   |          |         |         |   |         |          |          |   |         |          |          |   |         |          |          |   |         |          |          |   |          |          |          |   |         |          |          |   |          |          |          |   |          |          |          |
| C                                                                                                                                                                                                                     | 0.03730                                                                                                                                                                                                                                                                                                                                                                                                                                                                                                                                                                                                                                                                                                                                                                                                                                                                                                                                                                                                                                                                                                                                                                                                                                                                                                                                                                                                                                                                                                                                                                                                                                                                                                                                                                                                                                                                                                                                                                                                                                                                                                                                                                                                                                                                                                                                                                                                                                                                                                                                                              | -1.52995 | -2.74977 |         |          |   |          |         |         |   |          |          |          |   |          |         |          |   |          |         |          |   |          |         |          |   |          |          |          |   |          |         |          |   |          |          |         |   |          |          |         |   |          |         |         |   |          |         |          |   |          |         |          |   |          |          |         |   |          |         |         |   |                                                                                                                                                                                                                                                                                                                                                                                                                                                                                                                                                                                                                                                                                                                                                                                                                                                                                                                                                                                                                                                                                                                            |         |         |          |          |          |         |          |          |          |         |         |          |         |          |          |          |         |          |          |          |         |          |         |          |         |          |         |          |          |          |          |          |          |          |          |          |          |          |         |          |          |          |          |          |          |          |         |          |         |          |         |          |          |          |          |         |          |          |         |         |          |         |   |         |         |          |                                                                                                                                                                                                                       |                                                                                                                                                                                                                                                                                                                                                                                                                                                                                                                                                                                                                                                                                                                                                                                                                                                                                                                                                                                                                                                                                                                                                                                                                                                                                                                                                                                                                                                                                                                                                                                                                                                                                                                                                                                                                                                                                                                                                                                                                                                                                                                                                                                                                                                                                                                                                              |         |          |          |         |          |          |         |         |         |         |                                                                                                                                                                                                                        |                                                                                                                                                                                                                                                                                                                                                                                                                                                                                                                                                                                                                                                                                                                                                                                                                                                                                                                                                                                                                                                                                                                                                                                                                                                                                                                                                                                                                                                                                                                                                                                                                                                                                                                                                                                                                                                                                                                                                                                                                                                                                                                                                                                                                                                                                                                                                                                                                                                                                                                                                                                      |   |          |          |          |   |          |          |          |   |          |         |          |   |         |          |          |   |          |         |          |   |          |          |          |   |         |          |          |   |          |         |         |   |          |          |         |   |          |          |         |   |          |         |          |   |          |          |          |   |          |          |         |   |          |          |          |   |          |          |          |   |          |          |         |   |          |          |         |   |          |          |          |   |          |          |          |   |          |          |          |   |          |          |          |   |          |          |          |   |          |          |          |   |          |          |         |   |         |          |          |   |          |         |         |   |          |         |         |   |         |          |          |   |         |          |          |   |         |          |          |   |         |          |          |   |          |          |          |   |         |          |          |   |          |          |          |   |          |          |          |
| C                                                                                                                                                                                                                     | 0.05154                                                                                                                                                                                                                                                                                                                                                                                                                                                                                                                                                                                                                                                                                                                                                                                                                                                                                                                                                                                                                                                                                                                                                                                                                                                                                                                                                                                                                                                                                                                                                                                                                                                                                                                                                                                                                                                                                                                                                                                                                                                                                                                                                                                                                                                                                                                                                                                                                                                                                                                                                              | -1.34840 | -1.37355 |         |          |   |          |         |         |   |          |          |          |   |          |         |          |   |          |         |          |   |          |         |          |   |          |          |          |   |          |         |          |   |          |          |         |   |          |          |         |   |          |         |         |   |          |         |          |   |          |         |          |   |          |          |         |   |          |         |         |   |                                                                                                                                                                                                                                                                                                                                                                                                                                                                                                                                                                                                                                                                                                                                                                                                                                                                                                                                                                                                                                                                                                                            |         |         |          |          |          |         |          |          |          |         |         |          |         |          |          |          |         |          |          |          |         |          |         |          |         |          |         |          |          |          |          |          |          |          |          |          |          |          |         |          |          |          |          |          |          |          |         |          |         |          |         |          |          |          |          |         |          |          |         |         |          |         |   |         |         |          |                                                                                                                                                                                                                       |                                                                                                                                                                                                                                                                                                                                                                                                                                                                                                                                                                                                                                                                                                                                                                                                                                                                                                                                                                                                                                                                                                                                                                                                                                                                                                                                                                                                                                                                                                                                                                                                                                                                                                                                                                                                                                                                                                                                                                                                                                                                                                                                                                                                                                                                                                                                                              |         |          |          |         |          |          |         |         |         |         |                                                                                                                                                                                                                        |                                                                                                                                                                                                                                                                                                                                                                                                                                                                                                                                                                                                                                                                                                                                                                                                                                                                                                                                                                                                                                                                                                                                                                                                                                                                                                                                                                                                                                                                                                                                                                                                                                                                                                                                                                                                                                                                                                                                                                                                                                                                                                                                                                                                                                                                                                                                                                                                                                                                                                                                                                                      |   |          |          |          |   |          |          |          |   |          |         |          |   |         |          |          |   |          |         |          |   |          |          |          |   |         |          |          |   |          |         |         |   |          |          |         |   |          |          |         |   |          |         |          |   |          |          |          |   |          |          |         |   |          |          |          |   |          |          |          |   |          |          |         |   |          |          |         |   |          |          |          |   |          |          |          |   |          |          |          |   |          |          |          |   |          |          |          |   |          |          |          |   |          |          |         |   |         |          |          |   |          |         |         |   |          |         |         |   |         |          |          |   |         |          |          |   |         |          |          |   |         |          |          |   |          |          |          |   |         |          |          |   |          |          |          |   |          |          |          |
| C                                                                                                                                                                                                                     | 0.11670                                                                                                                                                                                                                                                                                                                                                                                                                                                                                                                                                                                                                                                                                                                                                                                                                                                                                                                                                                                                                                                                                                                                                                                                                                                                                                                                                                                                                                                                                                                                                                                                                                                                                                                                                                                                                                                                                                                                                                                                                                                                                                                                                                                                                                                                                                                                                                                                                                                                                                                                                              | 1.04001  | -1.59433 |         |          |   |          |         |         |   |          |          |          |   |          |         |          |   |          |         |          |   |          |         |          |   |          |          |          |   |          |         |          |   |          |          |         |   |          |          |         |   |          |         |         |   |          |         |          |   |          |         |          |   |          |          |         |   |          |         |         |   |                                                                                                                                                                                                                                                                                                                                                                                                                                                                                                                                                                                                                                                                                                                                                                                                                                                                                                                                                                                                                                                                                                                            |         |         |          |          |          |         |          |          |          |         |         |          |         |          |          |          |         |          |          |          |         |          |         |          |         |          |         |          |          |          |          |          |          |          |          |          |          |          |         |          |          |          |          |          |          |          |         |          |         |          |         |          |          |          |          |         |          |          |         |         |          |         |   |         |         |          |                                                                                                                                                                                                                       |                                                                                                                                                                                                                                                                                                                                                                                                                                                                                                                                                                                                                                                                                                                                                                                                                                                                                                                                                                                                                                                                                                                                                                                                                                                                                                                                                                                                                                                                                                                                                                                                                                                                                                                                                                                                                                                                                                                                                                                                                                                                                                                                                                                                                                                                                                                                                              |         |          |          |         |          |          |         |         |         |         |                                                                                                                                                                                                                        |                                                                                                                                                                                                                                                                                                                                                                                                                                                                                                                                                                                                                                                                                                                                                                                                                                                                                                                                                                                                                                                                                                                                                                                                                                                                                                                                                                                                                                                                                                                                                                                                                                                                                                                                                                                                                                                                                                                                                                                                                                                                                                                                                                                                                                                                                                                                                                                                                                                                                                                                                                                      |   |          |          |          |   |          |          |          |   |          |         |          |   |         |          |          |   |          |         |          |   |          |          |          |   |         |          |          |   |          |         |         |   |          |          |         |   |          |          |         |   |          |         |          |   |          |          |          |   |          |          |         |   |          |          |          |   |          |          |          |   |          |          |         |   |          |          |         |   |          |          |          |   |          |          |          |   |          |          |          |   |          |          |          |   |          |          |          |   |          |          |          |   |          |          |         |   |         |          |          |   |          |         |         |   |          |         |         |   |         |          |          |   |         |          |          |   |         |          |          |   |         |          |          |   |          |          |          |   |         |          |          |   |          |          |          |   |          |          |          |
| H                                                                                                                                                                                                                     | 0.12029                                                                                                                                                                                                                                                                                                                                                                                                                                                                                                                                                                                                                                                                                                                                                                                                                                                                                                                                                                                                                                                                                                                                                                                                                                                                                                                                                                                                                                                                                                                                                                                                                                                                                                                                                                                                                                                                                                                                                                                                                                                                                                                                                                                                                                                                                                                                                                                                                                                                                                                                                              | 1.67942  | -3.64271 |         |          |   |          |         |         |   |          |          |          |   |          |         |          |   |          |         |          |   |          |         |          |   |          |          |          |   |          |         |          |   |          |          |         |   |          |          |         |   |          |         |         |   |          |         |          |   |          |         |          |   |          |          |         |   |          |         |         |   |                                                                                                                                                                                                                                                                                                                                                                                                                                                                                                                                                                                                                                                                                                                                                                                                                                                                                                                                                                                                                                                                                                                            |         |         |          |          |          |         |          |          |          |         |         |          |         |          |          |          |         |          |          |          |         |          |         |          |         |          |         |          |          |          |          |          |          |          |          |          |          |          |         |          |          |          |          |          |          |          |         |          |         |          |         |          |          |          |          |         |          |          |         |         |          |         |   |         |         |          |                                                                                                                                                                                                                       |                                                                                                                                                                                                                                                                                                                                                                                                                                                                                                                                                                                                                                                                                                                                                                                                                                                                                                                                                                                                                                                                                                                                                                                                                                                                                                                                                                                                                                                                                                                                                                                                                                                                                                                                                                                                                                                                                                                                                                                                                                                                                                                                                                                                                                                                                                                                                              |         |          |          |         |          |          |         |         |         |         |                                                                                                                                                                                                                        |                                                                                                                                                                                                                                                                                                                                                                                                                                                                                                                                                                                                                                                                                                                                                                                                                                                                                                                                                                                                                                                                                                                                                                                                                                                                                                                                                                                                                                                                                                                                                                                                                                                                                                                                                                                                                                                                                                                                                                                                                                                                                                                                                                                                                                                                                                                                                                                                                                                                                                                                                                                      |   |          |          |          |   |          |          |          |   |          |         |          |   |         |          |          |   |          |         |          |   |          |          |          |   |         |          |          |   |          |         |         |   |          |          |         |   |          |          |         |   |          |         |          |   |          |          |          |   |          |          |         |   |          |          |          |   |          |          |          |   |          |          |         |   |          |          |         |   |          |          |          |   |          |          |          |   |          |          |          |   |          |          |          |   |          |          |          |   |          |          |          |   |          |          |         |   |         |          |          |   |          |         |         |   |          |         |         |   |         |          |          |   |         |          |          |   |         |          |          |   |         |          |          |   |          |          |          |   |         |          |          |   |          |          |          |   |          |          |          |
| H                                                                                                                                                                                                                     | 0.04353                                                                                                                                                                                                                                                                                                                                                                                                                                                                                                                                                                                                                                                                                                                                                                                                                                                                                                                                                                                                                                                                                                                                                                                                                                                                                                                                                                                                                                                                                                                                                                                                                                                                                                                                                                                                                                                                                                                                                                                                                                                                                                                                                                                                                                                                                                                                                                                                                                                                                                                                                              | -2.24126 | -0.78565 |         |          |   |          |         |         |   |          |          |          |   |          |         |          |   |          |         |          |   |          |         |          |   |          |          |          |   |          |         |          |   |          |          |         |   |          |          |         |   |          |         |         |   |          |         |          |   |          |         |          |   |          |          |         |   |          |         |         |   |                                                                                                                                                                                                                                                                                                                                                                                                                                                                                                                                                                                                                                                                                                                                                                                                                                                                                                                                                                                                                                                                                                                            |         |         |          |          |          |         |          |          |          |         |         |          |         |          |          |          |         |          |          |          |         |          |         |          |         |          |         |          |          |          |          |          |          |          |          |          |          |          |         |          |          |          |          |          |          |          |         |          |         |          |         |          |          |          |          |         |          |          |         |         |          |         |   |         |         |          |                                                                                                                                                                                                                       |                                                                                                                                                                                                                                                                                                                                                                                                                                                                                                                                                                                                                                                                                                                                                                                                                                                                                                                                                                                                                                                                                                                                                                                                                                                                                                                                                                                                                                                                                                                                                                                                                                                                                                                                                                                                                                                                                                                                                                                                                                                                                                                                                                                                                                                                                                                                                              |         |          |          |         |          |          |         |         |         |         |                                                                                                                                                                                                                        |                                                                                                                                                                                                                                                                                                                                                                                                                                                                                                                                                                                                                                                                                                                                                                                                                                                                                                                                                                                                                                                                                                                                                                                                                                                                                                                                                                                                                                                                                                                                                                                                                                                                                                                                                                                                                                                                                                                                                                                                                                                                                                                                                                                                                                                                                                                                                                                                                                                                                                                                                                                      |   |          |          |          |   |          |          |          |   |          |         |          |   |         |          |          |   |          |         |          |   |          |          |          |   |         |          |          |   |          |         |         |   |          |          |         |   |          |          |         |   |          |         |          |   |          |          |          |   |          |          |         |   |          |          |          |   |          |          |          |   |          |          |         |   |          |          |         |   |          |          |          |   |          |          |          |   |          |          |          |   |          |          |          |   |          |          |          |   |          |          |          |   |          |          |         |   |         |          |          |   |          |         |         |   |          |         |         |   |         |          |          |   |         |          |          |   |         |          |          |   |         |          |          |   |          |          |          |   |         |          |          |   |          |          |          |   |          |          |          |
| C                                                                                                                                                                                                                     | 0.06186                                                                                                                                                                                                                                                                                                                                                                                                                                                                                                                                                                                                                                                                                                                                                                                                                                                                                                                                                                                                                                                                                                                                                                                                                                                                                                                                                                                                                                                                                                                                                                                                                                                                                                                                                                                                                                                                                                                                                                                                                                                                                                                                                                                                                                                                                                                                                                                                                                                                                                                                                              | -0.09219 | 0.79836  |         |          |   |          |         |         |   |          |          |          |   |          |         |          |   |          |         |          |   |          |         |          |   |          |          |          |   |          |         |          |   |          |          |         |   |          |          |         |   |          |         |         |   |          |         |          |   |          |         |          |   |          |          |         |   |          |         |         |   |                                                                                                                                                                                                                                                                                                                                                                                                                                                                                                                                                                                                                                                                                                                                                                                                                                                                                                                                                                                                                                                                                                                            |         |         |          |          |          |         |          |          |          |         |         |          |         |          |          |          |         |          |          |          |         |          |         |          |         |          |         |          |          |          |          |          |          |          |          |          |          |          |         |          |          |          |          |          |          |          |         |          |         |          |         |          |          |          |          |         |          |          |         |         |          |         |   |         |         |          |                                                                                                                                                                                                                       |                                                                                                                                                                                                                                                                                                                                                                                                                                                                                                                                                                                                                                                                                                                                                                                                                                                                                                                                                                                                                                                                                                                                                                                                                                                                                                                                                                                                                                                                                                                                                                                                                                                                                                                                                                                                                                                                                                                                                                                                                                                                                                                                                                                                                                                                                                                                                              |         |          |          |         |          |          |         |         |         |         |                                                                                                                                                                                                                        |                                                                                                                                                                                                                                                                                                                                                                                                                                                                                                                                                                                                                                                                                                                                                                                                                                                                                                                                                                                                                                                                                                                                                                                                                                                                                                                                                                                                                                                                                                                                                                                                                                                                                                                                                                                                                                                                                                                                                                                                                                                                                                                                                                                                                                                                                                                                                                                                                                                                                                                                                                                      |   |          |          |          |   |          |          |          |   |          |         |          |   |         |          |          |   |          |         |          |   |          |          |          |   |         |          |          |   |          |         |         |   |          |          |         |   |          |          |         |   |          |         |          |   |          |          |          |   |          |          |         |   |          |          |          |   |          |          |          |   |          |          |         |   |          |          |         |   |          |          |          |   |          |          |          |   |          |          |          |   |          |          |          |   |          |          |          |   |          |          |          |   |          |          |         |   |         |          |          |   |          |         |         |   |          |         |         |   |         |          |          |   |         |          |          |   |         |          |          |   |         |          |          |   |          |          |          |   |         |          |          |   |          |          |          |   |          |          |          |
| C                                                                                                                                                                                                                     | 0.05877                                                                                                                                                                                                                                                                                                                                                                                                                                                                                                                                                                                                                                                                                                                                                                                                                                                                                                                                                                                                                                                                                                                                                                                                                                                                                                                                                                                                                                                                                                                                                                                                                                                                                                                                                                                                                                                                                                                                                                                                                                                                                                                                                                                                                                                                                                                                                                                                                                                                                                                                                              | 0.05666  | 3.68827  |         |          |   |          |         |         |   |          |          |          |   |          |         |          |   |          |         |          |   |          |         |          |   |          |          |          |   |          |         |          |   |          |          |         |   |          |          |         |   |          |         |         |   |          |         |          |   |          |         |          |   |          |          |         |   |          |         |         |   |                                                                                                                                                                                                                                                                                                                                                                                                                                                                                                                                                                                                                                                                                                                                                                                                                                                                                                                                                                                                                                                                                                                            |         |         |          |          |          |         |          |          |          |         |         |          |         |          |          |          |         |          |          |          |         |          |         |          |         |          |         |          |          |          |          |          |          |          |          |          |          |          |         |          |          |          |          |          |          |          |         |          |         |          |         |          |          |          |          |         |          |          |         |         |          |         |   |         |         |          |                                                                                                                                                                                                                       |                                                                                                                                                                                                                                                                                                                                                                                                                                                                                                                                                                                                                                                                                                                                                                                                                                                                                                                                                                                                                                                                                                                                                                                                                                                                                                                                                                                                                                                                                                                                                                                                                                                                                                                                                                                                                                                                                                                                                                                                                                                                                                                                                                                                                                                                                                                                                              |         |          |          |         |          |          |         |         |         |         |                                                                                                                                                                                                                        |                                                                                                                                                                                                                                                                                                                                                                                                                                                                                                                                                                                                                                                                                                                                                                                                                                                                                                                                                                                                                                                                                                                                                                                                                                                                                                                                                                                                                                                                                                                                                                                                                                                                                                                                                                                                                                                                                                                                                                                                                                                                                                                                                                                                                                                                                                                                                                                                                                                                                                                                                                                      |   |          |          |          |   |          |          |          |   |          |         |          |   |         |          |          |   |          |         |          |   |          |          |          |   |         |          |          |   |          |         |         |   |          |          |         |   |          |          |         |   |          |         |          |   |          |          |          |   |          |          |         |   |          |          |          |   |          |          |          |   |          |          |         |   |          |          |         |   |          |          |          |   |          |          |          |   |          |          |          |   |          |          |          |   |          |          |          |   |          |          |          |   |          |          |         |   |         |          |          |   |          |         |         |   |          |         |         |   |         |          |          |   |         |          |          |   |         |          |          |   |         |          |          |   |          |          |          |   |         |          |          |   |          |          |          |   |          |          |          |
| C                                                                                                                                                                                                                     | -0.00379                                                                                                                                                                                                                                                                                                                                                                                                                                                                                                                                                                                                                                                                                                                                                                                                                                                                                                                                                                                                                                                                                                                                                                                                                                                                                                                                                                                                                                                                                                                                                                                                                                                                                                                                                                                                                                                                                                                                                                                                                                                                                                                                                                                                                                                                                                                                                                                                                                                                                                                                                             | -1.25963 | 1.64238  |         |          |   |          |         |         |   |          |          |          |   |          |         |          |   |          |         |          |   |          |         |          |   |          |          |          |   |          |         |          |   |          |          |         |   |          |          |         |   |          |         |         |   |          |         |          |   |          |         |          |   |          |          |         |   |          |         |         |   |                                                                                                                                                                                                                                                                                                                                                                                                                                                                                                                                                                                                                                                                                                                                                                                                                                                                                                                                                                                                                                                                                                                            |         |         |          |          |          |         |          |          |          |         |         |          |         |          |          |          |         |          |          |          |         |          |         |          |         |          |         |          |          |          |          |          |          |          |          |          |          |          |         |          |          |          |          |          |          |          |         |          |         |          |         |          |          |          |          |         |          |          |         |         |          |         |   |         |         |          |                                                                                                                                                                                                                       |                                                                                                                                                                                                                                                                                                                                                                                                                                                                                                                                                                                                                                                                                                                                                                                                                                                                                                                                                                                                                                                                                                                                                                                                                                                                                                                                                                                                                                                                                                                                                                                                                                                                                                                                                                                                                                                                                                                                                                                                                                                                                                                                                                                                                                                                                                                                                              |         |          |          |         |          |          |         |         |         |         |                                                                                                                                                                                                                        |                                                                                                                                                                                                                                                                                                                                                                                                                                                                                                                                                                                                                                                                                                                                                                                                                                                                                                                                                                                                                                                                                                                                                                                                                                                                                                                                                                                                                                                                                                                                                                                                                                                                                                                                                                                                                                                                                                                                                                                                                                                                                                                                                                                                                                                                                                                                                                                                                                                                                                                                                                                      |   |          |          |          |   |          |          |          |   |          |         |          |   |         |          |          |   |          |         |          |   |          |          |          |   |         |          |          |   |          |         |         |   |          |          |         |   |          |          |         |   |          |         |          |   |          |          |          |   |          |          |         |   |          |          |          |   |          |          |          |   |          |          |         |   |          |          |         |   |          |          |          |   |          |          |          |   |          |          |          |   |          |          |          |   |          |          |          |   |          |          |          |   |          |          |         |   |         |          |          |   |          |         |         |   |          |         |         |   |         |          |          |   |         |          |          |   |         |          |          |   |         |          |          |   |          |          |          |   |         |          |          |   |          |          |          |   |          |          |          |
| C                                                                                                                                                                                                                     | 0.10613                                                                                                                                                                                                                                                                                                                                                                                                                                                                                                                                                                                                                                                                                                                                                                                                                                                                                                                                                                                                                                                                                                                                                                                                                                                                                                                                                                                                                                                                                                                                                                                                                                                                                                                                                                                                                                                                                                                                                                                                                                                                                                                                                                                                                                                                                                                                                                                                                                                                                                                                                              | 1.09827  | 1.53794  |         |          |   |          |         |         |   |          |          |          |   |          |         |          |   |          |         |          |   |          |         |          |   |          |          |          |   |          |         |          |   |          |          |         |   |          |          |         |   |          |         |         |   |          |         |          |   |          |         |          |   |          |          |         |   |          |         |         |   |                                                                                                                                                                                                                                                                                                                                                                                                                                                                                                                                                                                                                                                                                                                                                                                                                                                                                                                                                                                                                                                                                                                            |         |         |          |          |          |         |          |          |          |         |         |          |         |          |          |          |         |          |          |          |         |          |         |          |         |          |         |          |          |          |          |          |          |          |          |          |          |          |         |          |          |          |          |          |          |          |         |          |         |          |         |          |          |          |          |         |          |          |         |         |          |         |   |         |         |          |                                                                                                                                                                                                                       |                                                                                                                                                                                                                                                                                                                                                                                                                                                                                                                                                                                                                                                                                                                                                                                                                                                                                                                                                                                                                                                                                                                                                                                                                                                                                                                                                                                                                                                                                                                                                                                                                                                                                                                                                                                                                                                                                                                                                                                                                                                                                                                                                                                                                                                                                                                                                              |         |          |          |         |          |          |         |         |         |         |                                                                                                                                                                                                                        |                                                                                                                                                                                                                                                                                                                                                                                                                                                                                                                                                                                                                                                                                                                                                                                                                                                                                                                                                                                                                                                                                                                                                                                                                                                                                                                                                                                                                                                                                                                                                                                                                                                                                                                                                                                                                                                                                                                                                                                                                                                                                                                                                                                                                                                                                                                                                                                                                                                                                                                                                                                      |   |          |          |          |   |          |          |          |   |          |         |          |   |         |          |          |   |          |         |          |   |          |          |          |   |         |          |          |   |          |         |         |   |          |          |         |   |          |          |         |   |          |         |          |   |          |          |          |   |          |          |         |   |          |          |          |   |          |          |          |   |          |          |         |   |          |          |         |   |          |          |          |   |          |          |          |   |          |          |          |   |          |          |          |   |          |          |          |   |          |          |          |   |          |          |         |   |         |          |          |   |          |         |         |   |          |         |         |   |         |          |          |   |         |          |          |   |         |          |          |   |         |          |          |   |          |          |          |   |         |          |          |   |          |          |          |   |          |          |          |
| C                                                                                                                                                                                                                     | 0.10901                                                                                                                                                                                                                                                                                                                                                                                                                                                                                                                                                                                                                                                                                                                                                                                                                                                                                                                                                                                                                                                                                                                                                                                                                                                                                                                                                                                                                                                                                                                                                                                                                                                                                                                                                                                                                                                                                                                                                                                                                                                                                                                                                                                                                                                                                                                                                                                                                                                                                                                                                              | 1.20921  | 2.92481  |         |          |   |          |         |         |   |          |          |          |   |          |         |          |   |          |         |          |   |          |         |          |   |          |          |          |   |          |         |          |   |          |          |         |   |          |          |         |   |          |         |         |   |          |         |          |   |          |         |          |   |          |          |         |   |          |         |         |   |                                                                                                                                                                                                                                                                                                                                                                                                                                                                                                                                                                                                                                                                                                                                                                                                                                                                                                                                                                                                                                                                                                                            |         |         |          |          |          |         |          |          |          |         |         |          |         |          |          |          |         |          |          |          |         |          |         |          |         |          |         |          |          |          |          |          |          |          |          |          |          |          |         |          |          |          |          |          |          |          |         |          |         |          |         |          |          |          |          |         |          |          |         |         |          |         |   |         |         |          |                                                                                                                                                                                                                       |                                                                                                                                                                                                                                                                                                                                                                                                                                                                                                                                                                                                                                                                                                                                                                                                                                                                                                                                                                                                                                                                                                                                                                                                                                                                                                                                                                                                                                                                                                                                                                                                                                                                                                                                                                                                                                                                                                                                                                                                                                                                                                                                                                                                                                                                                                                                                              |         |          |          |         |          |          |         |         |         |         |                                                                                                                                                                                                                        |                                                                                                                                                                                                                                                                                                                                                                                                                                                                                                                                                                                                                                                                                                                                                                                                                                                                                                                                                                                                                                                                                                                                                                                                                                                                                                                                                                                                                                                                                                                                                                                                                                                                                                                                                                                                                                                                                                                                                                                                                                                                                                                                                                                                                                                                                                                                                                                                                                                                                                                                                                                      |   |          |          |          |   |          |          |          |   |          |         |          |   |         |          |          |   |          |         |          |   |          |          |          |   |         |          |          |   |          |         |         |   |          |          |         |   |          |          |         |   |          |         |          |   |          |          |          |   |          |          |         |   |          |          |          |   |          |          |          |   |          |          |         |   |          |          |         |   |          |          |          |   |          |          |          |   |          |          |          |   |          |          |          |   |          |          |          |   |          |          |          |   |          |          |         |   |         |          |          |   |          |         |         |   |          |         |         |   |         |          |          |   |         |          |          |   |         |          |          |   |         |          |          |   |          |          |          |   |         |          |          |   |          |          |          |   |          |          |          |
| C                                                                                                                                                                                                                     | -0.00004                                                                                                                                                                                                                                                                                                                                                                                                                                                                                                                                                                                                                                                                                                                                                                                                                                                                                                                                                                                                                                                                                                                                                                                                                                                                                                                                                                                                                                                                                                                                                                                                                                                                                                                                                                                                                                                                                                                                                                                                                                                                                                                                                                                                                                                                                                                                                                                                                                                                                                                                                             | -1.16685 | 3.03033  |         |          |   |          |         |         |   |          |          |          |   |          |         |          |   |          |         |          |   |          |         |          |   |          |          |          |   |          |         |          |   |          |          |         |   |          |          |         |   |          |         |         |   |          |         |          |   |          |         |          |   |          |          |         |   |          |         |         |   |                                                                                                                                                                                                                                                                                                                                                                                                                                                                                                                                                                                                                                                                                                                                                                                                                                                                                                                                                                                                                                                                                                                            |         |         |          |          |          |         |          |          |          |         |         |          |         |          |          |          |         |          |          |          |         |          |         |          |         |          |         |          |          |          |          |          |          |          |          |          |          |          |         |          |          |          |          |          |          |          |         |          |         |          |         |          |          |          |          |         |          |          |         |         |          |         |   |         |         |          |                                                                                                                                                                                                                       |                                                                                                                                                                                                                                                                                                                                                                                                                                                                                                                                                                                                                                                                                                                                                                                                                                                                                                                                                                                                                                                                                                                                                                                                                                                                                                                                                                                                                                                                                                                                                                                                                                                                                                                                                                                                                                                                                                                                                                                                                                                                                                                                                                                                                                                                                                                                                              |         |          |          |         |          |          |         |         |         |         |                                                                                                                                                                                                                        |                                                                                                                                                                                                                                                                                                                                                                                                                                                                                                                                                                                                                                                                                                                                                                                                                                                                                                                                                                                                                                                                                                                                                                                                                                                                                                                                                                                                                                                                                                                                                                                                                                                                                                                                                                                                                                                                                                                                                                                                                                                                                                                                                                                                                                                                                                                                                                                                                                                                                                                                                                                      |   |          |          |          |   |          |          |          |   |          |         |          |   |         |          |          |   |          |         |          |   |          |          |          |   |         |          |          |   |          |         |         |   |          |          |         |   |          |          |         |   |          |         |          |   |          |          |          |   |          |          |         |   |          |          |          |   |          |          |          |   |          |          |         |   |          |          |         |   |          |          |          |   |          |          |          |   |          |          |          |   |          |          |          |   |          |          |          |   |          |          |          |   |          |          |         |   |         |          |          |   |          |         |         |   |          |         |         |   |         |          |          |   |         |          |          |   |         |          |          |   |         |          |          |   |          |          |          |   |         |          |          |   |          |          |          |   |          |          |          |
| H                                                                                                                                                                                                                     | 0.13519                                                                                                                                                                                                                                                                                                                                                                                                                                                                                                                                                                                                                                                                                                                                                                                                                                                                                                                                                                                                                                                                                                                                                                                                                                                                                                                                                                                                                                                                                                                                                                                                                                                                                                                                                                                                                                                                                                                                                                                                                                                                                                                                                                                                                                                                                                                                                                                                                                                                                                                                                              | 2.03246  | 1.02747  |         |          |   |          |         |         |   |          |          |          |   |          |         |          |   |          |         |          |   |          |         |          |   |          |          |          |   |          |         |          |   |          |          |         |   |          |          |         |   |          |         |         |   |          |         |          |   |          |         |          |   |          |          |         |   |          |         |         |   |                                                                                                                                                                                                                                                                                                                                                                                                                                                                                                                                                                                                                                                                                                                                                                                                                                                                                                                                                                                                                                                                                                                            |         |         |          |          |          |         |          |          |          |         |         |          |         |          |          |          |         |          |          |          |         |          |         |          |         |          |         |          |          |          |          |          |          |          |          |          |          |          |         |          |          |          |          |          |          |          |         |          |         |          |         |          |          |          |          |         |          |          |         |         |          |         |   |         |         |          |                                                                                                                                                                                                                       |                                                                                                                                                                                                                                                                                                                                                                                                                                                                                                                                                                                                                                                                                                                                                                                                                                                                                                                                                                                                                                                                                                                                                                                                                                                                                                                                                                                                                                                                                                                                                                                                                                                                                                                                                                                                                                                                                                                                                                                                                                                                                                                                                                                                                                                                                                                                                              |         |          |          |         |          |          |         |         |         |         |                                                                                                                                                                                                                        |                                                                                                                                                                                                                                                                                                                                                                                                                                                                                                                                                                                                                                                                                                                                                                                                                                                                                                                                                                                                                                                                                                                                                                                                                                                                                                                                                                                                                                                                                                                                                                                                                                                                                                                                                                                                                                                                                                                                                                                                                                                                                                                                                                                                                                                                                                                                                                                                                                                                                                                                                                                      |   |          |          |          |   |          |          |          |   |          |         |          |   |         |          |          |   |          |         |          |   |          |          |          |   |         |          |          |   |          |         |         |   |          |          |         |   |          |          |         |   |          |         |          |   |          |          |          |   |          |          |         |   |          |          |          |   |          |          |          |   |          |          |         |   |          |          |         |   |          |          |          |   |          |          |          |   |          |          |          |   |          |          |          |   |          |          |          |   |          |          |          |   |          |          |         |   |         |          |          |   |          |         |         |   |          |         |         |   |         |          |          |   |         |          |          |   |         |          |          |   |         |          |          |   |          |          |          |   |         |          |          |   |          |          |          |   |          |          |          |

|                                                                                                                                                         |                                                                                                                                                                                                                                                                                                                                                                                                                                                                                                                                                                                                                                                                                                                                                                                                                                                                                                                                                                                                                                                                                                                                                                                                                                                                                                                                                                                                                                                                                                                                                                                                                                                                                                                                                                                                                                                                                                                                                                                                                                                                        |          |          |          |          |   |          |          |          |   |          |          |          |   |          |         |          |   |          |         |          |   |          |          |          |   |          |          |          |   |          |         |          |   |          |          |         |   |          |          |         |   |          |          |         |   |          |          |         |   |          |         |         |   |          |          |         |   |          |          |         |   |          |          |          |   |          |          |         |   |          |          |          |    |          |          |          |    |          |          |         |   |          |          |          |   |          |          |          |   |          |          |          |   |          |          |          |   |          |         |          |   |          |          |          |                                                                                                                                                         |                                                                                                                                                                                                                                                                                                                                                                                                                                                                                                                                                                                                                                                                                                                                                                                                                                                                                                                                                                                                                                                                                                                                                                                                                                                                                                                                                                                                                                                                                                                                                                                                                                                                                                                                                                                                                                                                                                                                   |         |          |          |          |         |          |                                                                                                                                                        |                                                                                                                                                                                                                                                                                                                                                                                                                                                                                                                                                                                                                                                                                                                                                                                                                                                                                                                                                                                                                                                                                                                                                                                                                                                                                                                                                                                                                                                                                                                                                                                                                                                                                                                                                                                                                                                                                                                                                                                                                                                                             |   |          |          |          |   |          |          |          |   |          |          |          |   |          |          |          |   |          |          |          |   |          |          |          |   |          |          |          |   |          |          |          |   |          |          |         |   |          |          |         |   |          |          |          |   |          |          |          |   |          |          |          |   |          |          |          |   |          |          |          |   |          |          |          |   |          |          |          |   |          |          |          |    |          |          |          |    |          |          |          |   |          |          |          |   |          |          |          |   |          |          |          |   |          |          |          |   |          |          |         |   |          |          |         |   |          |          |         |   |          |          |         |
|---------------------------------------------------------------------------------------------------------------------------------------------------------|------------------------------------------------------------------------------------------------------------------------------------------------------------------------------------------------------------------------------------------------------------------------------------------------------------------------------------------------------------------------------------------------------------------------------------------------------------------------------------------------------------------------------------------------------------------------------------------------------------------------------------------------------------------------------------------------------------------------------------------------------------------------------------------------------------------------------------------------------------------------------------------------------------------------------------------------------------------------------------------------------------------------------------------------------------------------------------------------------------------------------------------------------------------------------------------------------------------------------------------------------------------------------------------------------------------------------------------------------------------------------------------------------------------------------------------------------------------------------------------------------------------------------------------------------------------------------------------------------------------------------------------------------------------------------------------------------------------------------------------------------------------------------------------------------------------------------------------------------------------------------------------------------------------------------------------------------------------------------------------------------------------------------------------------------------------------|----------|----------|----------|----------|---|----------|----------|----------|---|----------|----------|----------|---|----------|---------|----------|---|----------|---------|----------|---|----------|----------|----------|---|----------|----------|----------|---|----------|---------|----------|---|----------|----------|---------|---|----------|----------|---------|---|----------|----------|---------|---|----------|----------|---------|---|----------|---------|---------|---|----------|----------|---------|---|----------|----------|---------|---|----------|----------|----------|---|----------|----------|---------|---|----------|----------|----------|----|----------|----------|----------|----|----------|----------|---------|---|----------|----------|----------|---|----------|----------|----------|---|----------|----------|----------|---|----------|----------|----------|---|----------|---------|----------|---|----------|----------|----------|---------------------------------------------------------------------------------------------------------------------------------------------------------|-----------------------------------------------------------------------------------------------------------------------------------------------------------------------------------------------------------------------------------------------------------------------------------------------------------------------------------------------------------------------------------------------------------------------------------------------------------------------------------------------------------------------------------------------------------------------------------------------------------------------------------------------------------------------------------------------------------------------------------------------------------------------------------------------------------------------------------------------------------------------------------------------------------------------------------------------------------------------------------------------------------------------------------------------------------------------------------------------------------------------------------------------------------------------------------------------------------------------------------------------------------------------------------------------------------------------------------------------------------------------------------------------------------------------------------------------------------------------------------------------------------------------------------------------------------------------------------------------------------------------------------------------------------------------------------------------------------------------------------------------------------------------------------------------------------------------------------------------------------------------------------------------------------------------------------|---------|----------|----------|----------|---------|----------|--------------------------------------------------------------------------------------------------------------------------------------------------------|-----------------------------------------------------------------------------------------------------------------------------------------------------------------------------------------------------------------------------------------------------------------------------------------------------------------------------------------------------------------------------------------------------------------------------------------------------------------------------------------------------------------------------------------------------------------------------------------------------------------------------------------------------------------------------------------------------------------------------------------------------------------------------------------------------------------------------------------------------------------------------------------------------------------------------------------------------------------------------------------------------------------------------------------------------------------------------------------------------------------------------------------------------------------------------------------------------------------------------------------------------------------------------------------------------------------------------------------------------------------------------------------------------------------------------------------------------------------------------------------------------------------------------------------------------------------------------------------------------------------------------------------------------------------------------------------------------------------------------------------------------------------------------------------------------------------------------------------------------------------------------------------------------------------------------------------------------------------------------------------------------------------------------------------------------------------------------|---|----------|----------|----------|---|----------|----------|----------|---|----------|----------|----------|---|----------|----------|----------|---|----------|----------|----------|---|----------|----------|----------|---|----------|----------|----------|---|----------|----------|----------|---|----------|----------|---------|---|----------|----------|---------|---|----------|----------|----------|---|----------|----------|----------|---|----------|----------|----------|---|----------|----------|----------|---|----------|----------|----------|---|----------|----------|----------|---|----------|----------|----------|---|----------|----------|----------|----|----------|----------|----------|----|----------|----------|----------|---|----------|----------|----------|---|----------|----------|----------|---|----------|----------|----------|---|----------|----------|----------|---|----------|----------|---------|---|----------|----------|---------|---|----------|----------|---------|---|----------|----------|---------|
| 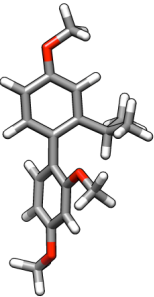 <p><b>3b</b><br/>-924.6660882<br/>-924.5197966<br/>-925.3507969</p>   | <table border="1"> <tbody> <tr><td>H</td><td>2.00580</td><td>1.33867</td><td>3.99891</td></tr> <tr><td>H</td><td>-1.21695</td><td>-1.02649</td><td>2.47017</td></tr> <tr><td>C</td><td>-2.79176</td><td>3.64751</td><td>1.44391</td></tr> <tr><td>H</td><td>-2.50866</td><td>2.82661</td><td>2.09966</td></tr> <tr><td>H</td><td>1.20234</td><td>4.77307</td><td>-2.01458</td></tr> <tr><td>C</td><td>-3.03013</td><td>4.87997</td><td>2.32787</td></tr> <tr><td>H</td><td>-3.33325</td><td>5.73737</td><td>1.72219</td></tr> <tr><td>H</td><td>-2.12321</td><td>5.15280</td><td>2.87086</td></tr> <tr><td>H</td><td>-3.82321</td><td>4.67894</td><td>3.05254</td></tr> <tr><td>C</td><td>-4.08315</td><td>3.24805</td><td>0.72010</td></tr> <tr><td>H</td><td>-4.43863</td><td>4.06369</td><td>0.08549</td></tr> <tr><td>H</td><td>-4.86892</td><td>3.02014</td><td>1.44486</td></tr> <tr><td>H</td><td>-3.91540</td><td>2.37262</td><td>0.09329</td></tr> <tr><td>O</td><td>-1.94282</td><td>0.80120</td><td>0.61031</td></tr> <tr><td>C</td><td>-2.76780</td><td>-0.35020</td><td>0.63337</td></tr> <tr><td>H</td><td>-3.50963</td><td>-0.20478</td><td>-0.14916</td></tr> <tr><td>H</td><td>-3.26758</td><td>-0.45695</td><td>1.60149</td></tr> <tr><td>H</td><td>-2.18806</td><td>-1.25578</td><td>0.42916</td></tr> <tr><td>O</td><td>0.60698</td><td>-1.00390</td><td>4.18554</td></tr> <tr><td>C</td><td>1.67631</td><td>-0.90674</td><td>5.11229</td></tr> <tr><td>H</td><td>1.53964</td><td>-0.05236</td><td>5.78303</td></tr> <tr><td>H</td><td>1.66467</td><td>-1.83054</td><td>5.68693</td></tr> <tr><td>H</td><td>2.63634</td><td>-0.80426</td><td>4.59619</td></tr> <tr><td>O</td><td>-0.87906</td><td>6.19878</td><td>-2.32516</td></tr> <tr><td>C</td><td>-2.08967</td><td>6.92952</td><td>-2.41506</td></tr> <tr><td>H</td><td>-2.29552</td><td>7.47000</td><td>-1.48509</td></tr> <tr><td>H</td><td>-1.95688</td><td>7.63919</td><td>-3.22920</td></tr> <tr><td>H</td><td>-2.93464</td><td>6.26868</td><td>-2.63566</td></tr> </tbody> </table>     | H        | 2.00580  | 1.33867  | 3.99891  | H | -1.21695 | -1.02649 | 2.47017  | C | -2.79176 | 3.64751  | 1.44391  | H | -2.50866 | 2.82661 | 2.09966  | H | 1.20234  | 4.77307 | -2.01458 | C | -3.03013 | 4.87997  | 2.32787  | H | -3.33325 | 5.73737  | 1.72219  | H | -2.12321 | 5.15280 | 2.87086  | H | -3.82321 | 4.67894  | 3.05254 | C | -4.08315 | 3.24805  | 0.72010 | H | -4.43863 | 4.06369  | 0.08549 | H | -4.86892 | 3.02014  | 1.44486 | H | -3.91540 | 2.37262 | 0.09329 | O | -1.94282 | 0.80120  | 0.61031 | C | -2.76780 | -0.35020 | 0.63337 | H | -3.50963 | -0.20478 | -0.14916 | H | -3.26758 | -0.45695 | 1.60149 | H | -2.18806 | -1.25578 | 0.42916  | O  | 0.60698  | -1.00390 | 4.18554  | C  | 1.67631  | -0.90674 | 5.11229 | H | 1.53964  | -0.05236 | 5.78303  | H | 1.66467  | -1.83054 | 5.68693  | H | 2.63634  | -0.80426 | 4.59619  | O | -0.87906 | 6.19878  | -2.32516 | C | -2.08967 | 6.92952 | -2.41506 | H | -2.29552 | 7.47000  | -1.48509 | H                                                                                                                                                       | -1.95688                                                                                                                                                                                                                                                                                                                                                                                                                                                                                                                                                                                                                                                                                                                                                                                                                                                                                                                                                                                                                                                                                                                                                                                                                                                                                                                                                                                                                                                                                                                                                                                                                                                                                                                                                                                                                                                                                                                          | 7.63919 | -3.22920 | H        | -2.93464 | 6.26868 | -2.63566 |  <p><b>3b</b><br/>-924.6394853<br/>-924.4928395<br/>-925.3255802</p> | <table border="1"> <tbody> <tr><td>H</td><td>0.14544</td><td>2.19080</td><td>3.37174</td></tr> <tr><td>H</td><td>-0.04629</td><td>-2.05250</td><td>3.64236</td></tr> <tr><td>C</td><td>0.13740</td><td>2.51008</td><td>-1.17219</td></tr> <tr><td>H</td><td>0.83643</td><td>2.61575</td><td>-0.34613</td></tr> <tr><td>H</td><td>0.01812</td><td>-2.53423</td><td>-3.14646</td></tr> <tr><td>O</td><td>-0.07743</td><td>-2.49964</td><td>1.07931</td></tr> <tr><td>C</td><td>-0.16038</td><td>-3.65364</td><td>1.89652</td></tr> <tr><td>H</td><td>-1.05512</td><td>-3.63084</td><td>2.52577</td></tr> <tr><td>H</td><td>0.72447</td><td>-3.75538</td><td>2.53195</td></tr> <tr><td>H</td><td>-0.21667</td><td>-4.49608</td><td>1.20968</td></tr> <tr><td>C</td><td>-1.27101</td><td>2.95326</td><td>-0.73635</td></tr> <tr><td>H</td><td>-1.92266</td><td>2.96380</td><td>-1.61308</td></tr> <tr><td>H</td><td>-1.24770</td><td>3.96160</td><td>-0.31431</td></tr> <tr><td>H</td><td>-1.70812</td><td>2.27714</td><td>-0.00228</td></tr> <tr><td>C</td><td>0.65711</td><td>3.50055</td><td>-2.22464</td></tr> <tr><td>H</td><td>-0.04871</td><td>3.63788</td><td>-3.04618</td></tr> <tr><td>H</td><td>1.61427</td><td>3.18153</td><td>-2.64009</td></tr> <tr><td>H</td><td>0.79253</td><td>4.47334</td><td>-1.74729</td></tr> <tr><td>O</td><td>0.02746</td><td>-0.43866</td><td>-4.93220</td></tr> <tr><td>O</td><td>0.05564</td><td>0.00926</td><td>5.47811</td></tr> <tr><td>C</td><td>-0.01289</td><td>-1.70872</td><td>-5.56113</td></tr> <tr><td>H</td><td>-0.91087</td><td>-2.26393</td><td>-5.27061</td></tr> <tr><td>H</td><td>-0.02945</td><td>-1.51848</td><td>-6.63237</td></tr> <tr><td>H</td><td>0.87029</td><td>-2.30336</td><td>-5.30533</td></tr> <tr><td>C</td><td>0.11097</td><td>1.24570</td><td>5.74199</td></tr> <tr><td>H</td><td>-0.75358</td><td>1.87167</td><td>5.49895</td></tr> <tr><td>H</td><td>0.10073</td><td>1.00017</td><td>6.80183</td></tr> <tr><td>H</td><td>1.02715</td><td>1.79266</td><td>5.49765</td></tr> </tbody> </table>      | H | 0.14544  | 2.19080  | 3.37174  | H | -0.04629 | -2.05250 | 3.64236  | C | 0.13740  | 2.51008  | -1.17219 | H | 0.83643  | 2.61575  | -0.34613 | H | 0.01812  | -2.53423 | -3.14646 | O | -0.07743 | -2.49964 | 1.07931  | C | -0.16038 | -3.65364 | 1.89652  | H | -1.05512 | -3.63084 | 2.52577  | H | 0.72447  | -3.75538 | 2.53195 | H | -0.21667 | -4.49608 | 1.20968 | C | -1.27101 | 2.95326  | -0.73635 | H | -1.92266 | 2.96380  | -1.61308 | H | -1.24770 | 3.96160  | -0.31431 | H | -1.70812 | 2.27714  | -0.00228 | C | 0.65711  | 3.50055  | -2.22464 | H | -0.04871 | 3.63788  | -3.04618 | H | 1.61427  | 3.18153  | -2.64009 | H | 0.79253  | 4.47334  | -1.74729 | O  | 0.02746  | -0.43866 | -4.93220 | O  | 0.05564  | 0.00926  | 5.47811  | C | -0.01289 | -1.70872 | -5.56113 | H | -0.91087 | -2.26393 | -5.27061 | H | -0.02945 | -1.51848 | -6.63237 | H | 0.87029  | -2.30336 | -5.30533 | C | 0.11097  | 1.24570  | 5.74199 | H | -0.75358 | 1.87167  | 5.49895 | H | 0.10073  | 1.00017  | 6.80183 | H | 1.02715  | 1.79266  | 5.49765 |
| H                                                                                                                                                       | 2.00580                                                                                                                                                                                                                                                                                                                                                                                                                                                                                                                                                                                                                                                                                                                                                                                                                                                                                                                                                                                                                                                                                                                                                                                                                                                                                                                                                                                                                                                                                                                                                                                                                                                                                                                                                                                                                                                                                                                                                                                                                                                                | 1.33867  | 3.99891  |          |          |   |          |          |          |   |          |          |          |   |          |         |          |   |          |         |          |   |          |          |          |   |          |          |          |   |          |         |          |   |          |          |         |   |          |          |         |   |          |          |         |   |          |          |         |   |          |         |         |   |          |          |         |   |          |          |         |   |          |          |          |   |          |          |         |   |          |          |          |    |          |          |          |    |          |          |         |   |          |          |          |   |          |          |          |   |          |          |          |   |          |          |          |   |          |         |          |   |          |          |          |                                                                                                                                                         |                                                                                                                                                                                                                                                                                                                                                                                                                                                                                                                                                                                                                                                                                                                                                                                                                                                                                                                                                                                                                                                                                                                                                                                                                                                                                                                                                                                                                                                                                                                                                                                                                                                                                                                                                                                                                                                                                                                                   |         |          |          |          |         |          |                                                                                                                                                        |                                                                                                                                                                                                                                                                                                                                                                                                                                                                                                                                                                                                                                                                                                                                                                                                                                                                                                                                                                                                                                                                                                                                                                                                                                                                                                                                                                                                                                                                                                                                                                                                                                                                                                                                                                                                                                                                                                                                                                                                                                                                             |   |          |          |          |   |          |          |          |   |          |          |          |   |          |          |          |   |          |          |          |   |          |          |          |   |          |          |          |   |          |          |          |   |          |          |         |   |          |          |         |   |          |          |          |   |          |          |          |   |          |          |          |   |          |          |          |   |          |          |          |   |          |          |          |   |          |          |          |   |          |          |          |    |          |          |          |    |          |          |          |   |          |          |          |   |          |          |          |   |          |          |          |   |          |          |          |   |          |          |         |   |          |          |         |   |          |          |         |   |          |          |         |
| H                                                                                                                                                       | -1.21695                                                                                                                                                                                                                                                                                                                                                                                                                                                                                                                                                                                                                                                                                                                                                                                                                                                                                                                                                                                                                                                                                                                                                                                                                                                                                                                                                                                                                                                                                                                                                                                                                                                                                                                                                                                                                                                                                                                                                                                                                                                               | -1.02649 | 2.47017  |          |          |   |          |          |          |   |          |          |          |   |          |         |          |   |          |         |          |   |          |          |          |   |          |          |          |   |          |         |          |   |          |          |         |   |          |          |         |   |          |          |         |   |          |          |         |   |          |         |         |   |          |          |         |   |          |          |         |   |          |          |          |   |          |          |         |   |          |          |          |    |          |          |          |    |          |          |         |   |          |          |          |   |          |          |          |   |          |          |          |   |          |          |          |   |          |         |          |   |          |          |          |                                                                                                                                                         |                                                                                                                                                                                                                                                                                                                                                                                                                                                                                                                                                                                                                                                                                                                                                                                                                                                                                                                                                                                                                                                                                                                                                                                                                                                                                                                                                                                                                                                                                                                                                                                                                                                                                                                                                                                                                                                                                                                                   |         |          |          |          |         |          |                                                                                                                                                        |                                                                                                                                                                                                                                                                                                                                                                                                                                                                                                                                                                                                                                                                                                                                                                                                                                                                                                                                                                                                                                                                                                                                                                                                                                                                                                                                                                                                                                                                                                                                                                                                                                                                                                                                                                                                                                                                                                                                                                                                                                                                             |   |          |          |          |   |          |          |          |   |          |          |          |   |          |          |          |   |          |          |          |   |          |          |          |   |          |          |          |   |          |          |          |   |          |          |         |   |          |          |         |   |          |          |          |   |          |          |          |   |          |          |          |   |          |          |          |   |          |          |          |   |          |          |          |   |          |          |          |   |          |          |          |    |          |          |          |    |          |          |          |   |          |          |          |   |          |          |          |   |          |          |          |   |          |          |          |   |          |          |         |   |          |          |         |   |          |          |         |   |          |          |         |
| C                                                                                                                                                       | -2.79176                                                                                                                                                                                                                                                                                                                                                                                                                                                                                                                                                                                                                                                                                                                                                                                                                                                                                                                                                                                                                                                                                                                                                                                                                                                                                                                                                                                                                                                                                                                                                                                                                                                                                                                                                                                                                                                                                                                                                                                                                                                               | 3.64751  | 1.44391  |          |          |   |          |          |          |   |          |          |          |   |          |         |          |   |          |         |          |   |          |          |          |   |          |          |          |   |          |         |          |   |          |          |         |   |          |          |         |   |          |          |         |   |          |          |         |   |          |         |         |   |          |          |         |   |          |          |         |   |          |          |          |   |          |          |         |   |          |          |          |    |          |          |          |    |          |          |         |   |          |          |          |   |          |          |          |   |          |          |          |   |          |          |          |   |          |         |          |   |          |          |          |                                                                                                                                                         |                                                                                                                                                                                                                                                                                                                                                                                                                                                                                                                                                                                                                                                                                                                                                                                                                                                                                                                                                                                                                                                                                                                                                                                                                                                                                                                                                                                                                                                                                                                                                                                                                                                                                                                                                                                                                                                                                                                                   |         |          |          |          |         |          |                                                                                                                                                        |                                                                                                                                                                                                                                                                                                                                                                                                                                                                                                                                                                                                                                                                                                                                                                                                                                                                                                                                                                                                                                                                                                                                                                                                                                                                                                                                                                                                                                                                                                                                                                                                                                                                                                                                                                                                                                                                                                                                                                                                                                                                             |   |          |          |          |   |          |          |          |   |          |          |          |   |          |          |          |   |          |          |          |   |          |          |          |   |          |          |          |   |          |          |          |   |          |          |         |   |          |          |         |   |          |          |          |   |          |          |          |   |          |          |          |   |          |          |          |   |          |          |          |   |          |          |          |   |          |          |          |   |          |          |          |    |          |          |          |    |          |          |          |   |          |          |          |   |          |          |          |   |          |          |          |   |          |          |          |   |          |          |         |   |          |          |         |   |          |          |         |   |          |          |         |
| H                                                                                                                                                       | -2.50866                                                                                                                                                                                                                                                                                                                                                                                                                                                                                                                                                                                                                                                                                                                                                                                                                                                                                                                                                                                                                                                                                                                                                                                                                                                                                                                                                                                                                                                                                                                                                                                                                                                                                                                                                                                                                                                                                                                                                                                                                                                               | 2.82661  | 2.09966  |          |          |   |          |          |          |   |          |          |          |   |          |         |          |   |          |         |          |   |          |          |          |   |          |          |          |   |          |         |          |   |          |          |         |   |          |          |         |   |          |          |         |   |          |          |         |   |          |         |         |   |          |          |         |   |          |          |         |   |          |          |          |   |          |          |         |   |          |          |          |    |          |          |          |    |          |          |         |   |          |          |          |   |          |          |          |   |          |          |          |   |          |          |          |   |          |         |          |   |          |          |          |                                                                                                                                                         |                                                                                                                                                                                                                                                                                                                                                                                                                                                                                                                                                                                                                                                                                                                                                                                                                                                                                                                                                                                                                                                                                                                                                                                                                                                                                                                                                                                                                                                                                                                                                                                                                                                                                                                                                                                                                                                                                                                                   |         |          |          |          |         |          |                                                                                                                                                        |                                                                                                                                                                                                                                                                                                                                                                                                                                                                                                                                                                                                                                                                                                                                                                                                                                                                                                                                                                                                                                                                                                                                                                                                                                                                                                                                                                                                                                                                                                                                                                                                                                                                                                                                                                                                                                                                                                                                                                                                                                                                             |   |          |          |          |   |          |          |          |   |          |          |          |   |          |          |          |   |          |          |          |   |          |          |          |   |          |          |          |   |          |          |          |   |          |          |         |   |          |          |         |   |          |          |          |   |          |          |          |   |          |          |          |   |          |          |          |   |          |          |          |   |          |          |          |   |          |          |          |   |          |          |          |    |          |          |          |    |          |          |          |   |          |          |          |   |          |          |          |   |          |          |          |   |          |          |          |   |          |          |         |   |          |          |         |   |          |          |         |   |          |          |         |
| H                                                                                                                                                       | 1.20234                                                                                                                                                                                                                                                                                                                                                                                                                                                                                                                                                                                                                                                                                                                                                                                                                                                                                                                                                                                                                                                                                                                                                                                                                                                                                                                                                                                                                                                                                                                                                                                                                                                                                                                                                                                                                                                                                                                                                                                                                                                                | 4.77307  | -2.01458 |          |          |   |          |          |          |   |          |          |          |   |          |         |          |   |          |         |          |   |          |          |          |   |          |          |          |   |          |         |          |   |          |          |         |   |          |          |         |   |          |          |         |   |          |          |         |   |          |         |         |   |          |          |         |   |          |          |         |   |          |          |          |   |          |          |         |   |          |          |          |    |          |          |          |    |          |          |         |   |          |          |          |   |          |          |          |   |          |          |          |   |          |          |          |   |          |         |          |   |          |          |          |                                                                                                                                                         |                                                                                                                                                                                                                                                                                                                                                                                                                                                                                                                                                                                                                                                                                                                                                                                                                                                                                                                                                                                                                                                                                                                                                                                                                                                                                                                                                                                                                                                                                                                                                                                                                                                                                                                                                                                                                                                                                                                                   |         |          |          |          |         |          |                                                                                                                                                        |                                                                                                                                                                                                                                                                                                                                                                                                                                                                                                                                                                                                                                                                                                                                                                                                                                                                                                                                                                                                                                                                                                                                                                                                                                                                                                                                                                                                                                                                                                                                                                                                                                                                                                                                                                                                                                                                                                                                                                                                                                                                             |   |          |          |          |   |          |          |          |   |          |          |          |   |          |          |          |   |          |          |          |   |          |          |          |   |          |          |          |   |          |          |          |   |          |          |         |   |          |          |         |   |          |          |          |   |          |          |          |   |          |          |          |   |          |          |          |   |          |          |          |   |          |          |          |   |          |          |          |   |          |          |          |    |          |          |          |    |          |          |          |   |          |          |          |   |          |          |          |   |          |          |          |   |          |          |          |   |          |          |         |   |          |          |         |   |          |          |         |   |          |          |         |
| C                                                                                                                                                       | -3.03013                                                                                                                                                                                                                                                                                                                                                                                                                                                                                                                                                                                                                                                                                                                                                                                                                                                                                                                                                                                                                                                                                                                                                                                                                                                                                                                                                                                                                                                                                                                                                                                                                                                                                                                                                                                                                                                                                                                                                                                                                                                               | 4.87997  | 2.32787  |          |          |   |          |          |          |   |          |          |          |   |          |         |          |   |          |         |          |   |          |          |          |   |          |          |          |   |          |         |          |   |          |          |         |   |          |          |         |   |          |          |         |   |          |          |         |   |          |         |         |   |          |          |         |   |          |          |         |   |          |          |          |   |          |          |         |   |          |          |          |    |          |          |          |    |          |          |         |   |          |          |          |   |          |          |          |   |          |          |          |   |          |          |          |   |          |         |          |   |          |          |          |                                                                                                                                                         |                                                                                                                                                                                                                                                                                                                                                                                                                                                                                                                                                                                                                                                                                                                                                                                                                                                                                                                                                                                                                                                                                                                                                                                                                                                                                                                                                                                                                                                                                                                                                                                                                                                                                                                                                                                                                                                                                                                                   |         |          |          |          |         |          |                                                                                                                                                        |                                                                                                                                                                                                                                                                                                                                                                                                                                                                                                                                                                                                                                                                                                                                                                                                                                                                                                                                                                                                                                                                                                                                                                                                                                                                                                                                                                                                                                                                                                                                                                                                                                                                                                                                                                                                                                                                                                                                                                                                                                                                             |   |          |          |          |   |          |          |          |   |          |          |          |   |          |          |          |   |          |          |          |   |          |          |          |   |          |          |          |   |          |          |          |   |          |          |         |   |          |          |         |   |          |          |          |   |          |          |          |   |          |          |          |   |          |          |          |   |          |          |          |   |          |          |          |   |          |          |          |   |          |          |          |    |          |          |          |    |          |          |          |   |          |          |          |   |          |          |          |   |          |          |          |   |          |          |          |   |          |          |         |   |          |          |         |   |          |          |         |   |          |          |         |
| H                                                                                                                                                       | -3.33325                                                                                                                                                                                                                                                                                                                                                                                                                                                                                                                                                                                                                                                                                                                                                                                                                                                                                                                                                                                                                                                                                                                                                                                                                                                                                                                                                                                                                                                                                                                                                                                                                                                                                                                                                                                                                                                                                                                                                                                                                                                               | 5.73737  | 1.72219  |          |          |   |          |          |          |   |          |          |          |   |          |         |          |   |          |         |          |   |          |          |          |   |          |          |          |   |          |         |          |   |          |          |         |   |          |          |         |   |          |          |         |   |          |          |         |   |          |         |         |   |          |          |         |   |          |          |         |   |          |          |          |   |          |          |         |   |          |          |          |    |          |          |          |    |          |          |         |   |          |          |          |   |          |          |          |   |          |          |          |   |          |          |          |   |          |         |          |   |          |          |          |                                                                                                                                                         |                                                                                                                                                                                                                                                                                                                                                                                                                                                                                                                                                                                                                                                                                                                                                                                                                                                                                                                                                                                                                                                                                                                                                                                                                                                                                                                                                                                                                                                                                                                                                                                                                                                                                                                                                                                                                                                                                                                                   |         |          |          |          |         |          |                                                                                                                                                        |                                                                                                                                                                                                                                                                                                                                                                                                                                                                                                                                                                                                                                                                                                                                                                                                                                                                                                                                                                                                                                                                                                                                                                                                                                                                                                                                                                                                                                                                                                                                                                                                                                                                                                                                                                                                                                                                                                                                                                                                                                                                             |   |          |          |          |   |          |          |          |   |          |          |          |   |          |          |          |   |          |          |          |   |          |          |          |   |          |          |          |   |          |          |          |   |          |          |         |   |          |          |         |   |          |          |          |   |          |          |          |   |          |          |          |   |          |          |          |   |          |          |          |   |          |          |          |   |          |          |          |   |          |          |          |    |          |          |          |    |          |          |          |   |          |          |          |   |          |          |          |   |          |          |          |   |          |          |          |   |          |          |         |   |          |          |         |   |          |          |         |   |          |          |         |
| H                                                                                                                                                       | -2.12321                                                                                                                                                                                                                                                                                                                                                                                                                                                                                                                                                                                                                                                                                                                                                                                                                                                                                                                                                                                                                                                                                                                                                                                                                                                                                                                                                                                                                                                                                                                                                                                                                                                                                                                                                                                                                                                                                                                                                                                                                                                               | 5.15280  | 2.87086  |          |          |   |          |          |          |   |          |          |          |   |          |         |          |   |          |         |          |   |          |          |          |   |          |          |          |   |          |         |          |   |          |          |         |   |          |          |         |   |          |          |         |   |          |          |         |   |          |         |         |   |          |          |         |   |          |          |         |   |          |          |          |   |          |          |         |   |          |          |          |    |          |          |          |    |          |          |         |   |          |          |          |   |          |          |          |   |          |          |          |   |          |          |          |   |          |         |          |   |          |          |          |                                                                                                                                                         |                                                                                                                                                                                                                                                                                                                                                                                                                                                                                                                                                                                                                                                                                                                                                                                                                                                                                                                                                                                                                                                                                                                                                                                                                                                                                                                                                                                                                                                                                                                                                                                                                                                                                                                                                                                                                                                                                                                                   |         |          |          |          |         |          |                                                                                                                                                        |                                                                                                                                                                                                                                                                                                                                                                                                                                                                                                                                                                                                                                                                                                                                                                                                                                                                                                                                                                                                                                                                                                                                                                                                                                                                                                                                                                                                                                                                                                                                                                                                                                                                                                                                                                                                                                                                                                                                                                                                                                                                             |   |          |          |          |   |          |          |          |   |          |          |          |   |          |          |          |   |          |          |          |   |          |          |          |   |          |          |          |   |          |          |          |   |          |          |         |   |          |          |         |   |          |          |          |   |          |          |          |   |          |          |          |   |          |          |          |   |          |          |          |   |          |          |          |   |          |          |          |   |          |          |          |    |          |          |          |    |          |          |          |   |          |          |          |   |          |          |          |   |          |          |          |   |          |          |          |   |          |          |         |   |          |          |         |   |          |          |         |   |          |          |         |
| H                                                                                                                                                       | -3.82321                                                                                                                                                                                                                                                                                                                                                                                                                                                                                                                                                                                                                                                                                                                                                                                                                                                                                                                                                                                                                                                                                                                                                                                                                                                                                                                                                                                                                                                                                                                                                                                                                                                                                                                                                                                                                                                                                                                                                                                                                                                               | 4.67894  | 3.05254  |          |          |   |          |          |          |   |          |          |          |   |          |         |          |   |          |         |          |   |          |          |          |   |          |          |          |   |          |         |          |   |          |          |         |   |          |          |         |   |          |          |         |   |          |          |         |   |          |         |         |   |          |          |         |   |          |          |         |   |          |          |          |   |          |          |         |   |          |          |          |    |          |          |          |    |          |          |         |   |          |          |          |   |          |          |          |   |          |          |          |   |          |          |          |   |          |         |          |   |          |          |          |                                                                                                                                                         |                                                                                                                                                                                                                                                                                                                                                                                                                                                                                                                                                                                                                                                                                                                                                                                                                                                                                                                                                                                                                                                                                                                                                                                                                                                                                                                                                                                                                                                                                                                                                                                                                                                                                                                                                                                                                                                                                                                                   |         |          |          |          |         |          |                                                                                                                                                        |                                                                                                                                                                                                                                                                                                                                                                                                                                                                                                                                                                                                                                                                                                                                                                                                                                                                                                                                                                                                                                                                                                                                                                                                                                                                                                                                                                                                                                                                                                                                                                                                                                                                                                                                                                                                                                                                                                                                                                                                                                                                             |   |          |          |          |   |          |          |          |   |          |          |          |   |          |          |          |   |          |          |          |   |          |          |          |   |          |          |          |   |          |          |          |   |          |          |         |   |          |          |         |   |          |          |          |   |          |          |          |   |          |          |          |   |          |          |          |   |          |          |          |   |          |          |          |   |          |          |          |   |          |          |          |    |          |          |          |    |          |          |          |   |          |          |          |   |          |          |          |   |          |          |          |   |          |          |          |   |          |          |         |   |          |          |         |   |          |          |         |   |          |          |         |
| C                                                                                                                                                       | -4.08315                                                                                                                                                                                                                                                                                                                                                                                                                                                                                                                                                                                                                                                                                                                                                                                                                                                                                                                                                                                                                                                                                                                                                                                                                                                                                                                                                                                                                                                                                                                                                                                                                                                                                                                                                                                                                                                                                                                                                                                                                                                               | 3.24805  | 0.72010  |          |          |   |          |          |          |   |          |          |          |   |          |         |          |   |          |         |          |   |          |          |          |   |          |          |          |   |          |         |          |   |          |          |         |   |          |          |         |   |          |          |         |   |          |          |         |   |          |         |         |   |          |          |         |   |          |          |         |   |          |          |          |   |          |          |         |   |          |          |          |    |          |          |          |    |          |          |         |   |          |          |          |   |          |          |          |   |          |          |          |   |          |          |          |   |          |         |          |   |          |          |          |                                                                                                                                                         |                                                                                                                                                                                                                                                                                                                                                                                                                                                                                                                                                                                                                                                                                                                                                                                                                                                                                                                                                                                                                                                                                                                                                                                                                                                                                                                                                                                                                                                                                                                                                                                                                                                                                                                                                                                                                                                                                                                                   |         |          |          |          |         |          |                                                                                                                                                        |                                                                                                                                                                                                                                                                                                                                                                                                                                                                                                                                                                                                                                                                                                                                                                                                                                                                                                                                                                                                                                                                                                                                                                                                                                                                                                                                                                                                                                                                                                                                                                                                                                                                                                                                                                                                                                                                                                                                                                                                                                                                             |   |          |          |          |   |          |          |          |   |          |          |          |   |          |          |          |   |          |          |          |   |          |          |          |   |          |          |          |   |          |          |          |   |          |          |         |   |          |          |         |   |          |          |          |   |          |          |          |   |          |          |          |   |          |          |          |   |          |          |          |   |          |          |          |   |          |          |          |   |          |          |          |    |          |          |          |    |          |          |          |   |          |          |          |   |          |          |          |   |          |          |          |   |          |          |          |   |          |          |         |   |          |          |         |   |          |          |         |   |          |          |         |
| H                                                                                                                                                       | -4.43863                                                                                                                                                                                                                                                                                                                                                                                                                                                                                                                                                                                                                                                                                                                                                                                                                                                                                                                                                                                                                                                                                                                                                                                                                                                                                                                                                                                                                                                                                                                                                                                                                                                                                                                                                                                                                                                                                                                                                                                                                                                               | 4.06369  | 0.08549  |          |          |   |          |          |          |   |          |          |          |   |          |         |          |   |          |         |          |   |          |          |          |   |          |          |          |   |          |         |          |   |          |          |         |   |          |          |         |   |          |          |         |   |          |          |         |   |          |         |         |   |          |          |         |   |          |          |         |   |          |          |          |   |          |          |         |   |          |          |          |    |          |          |          |    |          |          |         |   |          |          |          |   |          |          |          |   |          |          |          |   |          |          |          |   |          |         |          |   |          |          |          |                                                                                                                                                         |                                                                                                                                                                                                                                                                                                                                                                                                                                                                                                                                                                                                                                                                                                                                                                                                                                                                                                                                                                                                                                                                                                                                                                                                                                                                                                                                                                                                                                                                                                                                                                                                                                                                                                                                                                                                                                                                                                                                   |         |          |          |          |         |          |                                                                                                                                                        |                                                                                                                                                                                                                                                                                                                                                                                                                                                                                                                                                                                                                                                                                                                                                                                                                                                                                                                                                                                                                                                                                                                                                                                                                                                                                                                                                                                                                                                                                                                                                                                                                                                                                                                                                                                                                                                                                                                                                                                                                                                                             |   |          |          |          |   |          |          |          |   |          |          |          |   |          |          |          |   |          |          |          |   |          |          |          |   |          |          |          |   |          |          |          |   |          |          |         |   |          |          |         |   |          |          |          |   |          |          |          |   |          |          |          |   |          |          |          |   |          |          |          |   |          |          |          |   |          |          |          |   |          |          |          |    |          |          |          |    |          |          |          |   |          |          |          |   |          |          |          |   |          |          |          |   |          |          |          |   |          |          |         |   |          |          |         |   |          |          |         |   |          |          |         |
| H                                                                                                                                                       | -4.86892                                                                                                                                                                                                                                                                                                                                                                                                                                                                                                                                                                                                                                                                                                                                                                                                                                                                                                                                                                                                                                                                                                                                                                                                                                                                                                                                                                                                                                                                                                                                                                                                                                                                                                                                                                                                                                                                                                                                                                                                                                                               | 3.02014  | 1.44486  |          |          |   |          |          |          |   |          |          |          |   |          |         |          |   |          |         |          |   |          |          |          |   |          |          |          |   |          |         |          |   |          |          |         |   |          |          |         |   |          |          |         |   |          |          |         |   |          |         |         |   |          |          |         |   |          |          |         |   |          |          |          |   |          |          |         |   |          |          |          |    |          |          |          |    |          |          |         |   |          |          |          |   |          |          |          |   |          |          |          |   |          |          |          |   |          |         |          |   |          |          |          |                                                                                                                                                         |                                                                                                                                                                                                                                                                                                                                                                                                                                                                                                                                                                                                                                                                                                                                                                                                                                                                                                                                                                                                                                                                                                                                                                                                                                                                                                                                                                                                                                                                                                                                                                                                                                                                                                                                                                                                                                                                                                                                   |         |          |          |          |         |          |                                                                                                                                                        |                                                                                                                                                                                                                                                                                                                                                                                                                                                                                                                                                                                                                                                                                                                                                                                                                                                                                                                                                                                                                                                                                                                                                                                                                                                                                                                                                                                                                                                                                                                                                                                                                                                                                                                                                                                                                                                                                                                                                                                                                                                                             |   |          |          |          |   |          |          |          |   |          |          |          |   |          |          |          |   |          |          |          |   |          |          |          |   |          |          |          |   |          |          |          |   |          |          |         |   |          |          |         |   |          |          |          |   |          |          |          |   |          |          |          |   |          |          |          |   |          |          |          |   |          |          |          |   |          |          |          |   |          |          |          |    |          |          |          |    |          |          |          |   |          |          |          |   |          |          |          |   |          |          |          |   |          |          |          |   |          |          |         |   |          |          |         |   |          |          |         |   |          |          |         |
| H                                                                                                                                                       | -3.91540                                                                                                                                                                                                                                                                                                                                                                                                                                                                                                                                                                                                                                                                                                                                                                                                                                                                                                                                                                                                                                                                                                                                                                                                                                                                                                                                                                                                                                                                                                                                                                                                                                                                                                                                                                                                                                                                                                                                                                                                                                                               | 2.37262  | 0.09329  |          |          |   |          |          |          |   |          |          |          |   |          |         |          |   |          |         |          |   |          |          |          |   |          |          |          |   |          |         |          |   |          |          |         |   |          |          |         |   |          |          |         |   |          |          |         |   |          |         |         |   |          |          |         |   |          |          |         |   |          |          |          |   |          |          |         |   |          |          |          |    |          |          |          |    |          |          |         |   |          |          |          |   |          |          |          |   |          |          |          |   |          |          |          |   |          |         |          |   |          |          |          |                                                                                                                                                         |                                                                                                                                                                                                                                                                                                                                                                                                                                                                                                                                                                                                                                                                                                                                                                                                                                                                                                                                                                                                                                                                                                                                                                                                                                                                                                                                                                                                                                                                                                                                                                                                                                                                                                                                                                                                                                                                                                                                   |         |          |          |          |         |          |                                                                                                                                                        |                                                                                                                                                                                                                                                                                                                                                                                                                                                                                                                                                                                                                                                                                                                                                                                                                                                                                                                                                                                                                                                                                                                                                                                                                                                                                                                                                                                                                                                                                                                                                                                                                                                                                                                                                                                                                                                                                                                                                                                                                                                                             |   |          |          |          |   |          |          |          |   |          |          |          |   |          |          |          |   |          |          |          |   |          |          |          |   |          |          |          |   |          |          |          |   |          |          |         |   |          |          |         |   |          |          |          |   |          |          |          |   |          |          |          |   |          |          |          |   |          |          |          |   |          |          |          |   |          |          |          |   |          |          |          |    |          |          |          |    |          |          |          |   |          |          |          |   |          |          |          |   |          |          |          |   |          |          |          |   |          |          |         |   |          |          |         |   |          |          |         |   |          |          |         |
| O                                                                                                                                                       | -1.94282                                                                                                                                                                                                                                                                                                                                                                                                                                                                                                                                                                                                                                                                                                                                                                                                                                                                                                                                                                                                                                                                                                                                                                                                                                                                                                                                                                                                                                                                                                                                                                                                                                                                                                                                                                                                                                                                                                                                                                                                                                                               | 0.80120  | 0.61031  |          |          |   |          |          |          |   |          |          |          |   |          |         |          |   |          |         |          |   |          |          |          |   |          |          |          |   |          |         |          |   |          |          |         |   |          |          |         |   |          |          |         |   |          |          |         |   |          |         |         |   |          |          |         |   |          |          |         |   |          |          |          |   |          |          |         |   |          |          |          |    |          |          |          |    |          |          |         |   |          |          |          |   |          |          |          |   |          |          |          |   |          |          |          |   |          |         |          |   |          |          |          |                                                                                                                                                         |                                                                                                                                                                                                                                                                                                                                                                                                                                                                                                                                                                                                                                                                                                                                                                                                                                                                                                                                                                                                                                                                                                                                                                                                                                                                                                                                                                                                                                                                                                                                                                                                                                                                                                                                                                                                                                                                                                                                   |         |          |          |          |         |          |                                                                                                                                                        |                                                                                                                                                                                                                                                                                                                                                                                                                                                                                                                                                                                                                                                                                                                                                                                                                                                                                                                                                                                                                                                                                                                                                                                                                                                                                                                                                                                                                                                                                                                                                                                                                                                                                                                                                                                                                                                                                                                                                                                                                                                                             |   |          |          |          |   |          |          |          |   |          |          |          |   |          |          |          |   |          |          |          |   |          |          |          |   |          |          |          |   |          |          |          |   |          |          |         |   |          |          |         |   |          |          |          |   |          |          |          |   |          |          |          |   |          |          |          |   |          |          |          |   |          |          |          |   |          |          |          |   |          |          |          |    |          |          |          |    |          |          |          |   |          |          |          |   |          |          |          |   |          |          |          |   |          |          |          |   |          |          |         |   |          |          |         |   |          |          |         |   |          |          |         |
| C                                                                                                                                                       | -2.76780                                                                                                                                                                                                                                                                                                                                                                                                                                                                                                                                                                                                                                                                                                                                                                                                                                                                                                                                                                                                                                                                                                                                                                                                                                                                                                                                                                                                                                                                                                                                                                                                                                                                                                                                                                                                                                                                                                                                                                                                                                                               | -0.35020 | 0.63337  |          |          |   |          |          |          |   |          |          |          |   |          |         |          |   |          |         |          |   |          |          |          |   |          |          |          |   |          |         |          |   |          |          |         |   |          |          |         |   |          |          |         |   |          |          |         |   |          |         |         |   |          |          |         |   |          |          |         |   |          |          |          |   |          |          |         |   |          |          |          |    |          |          |          |    |          |          |         |   |          |          |          |   |          |          |          |   |          |          |          |   |          |          |          |   |          |         |          |   |          |          |          |                                                                                                                                                         |                                                                                                                                                                                                                                                                                                                                                                                                                                                                                                                                                                                                                                                                                                                                                                                                                                                                                                                                                                                                                                                                                                                                                                                                                                                                                                                                                                                                                                                                                                                                                                                                                                                                                                                                                                                                                                                                                                                                   |         |          |          |          |         |          |                                                                                                                                                        |                                                                                                                                                                                                                                                                                                                                                                                                                                                                                                                                                                                                                                                                                                                                                                                                                                                                                                                                                                                                                                                                                                                                                                                                                                                                                                                                                                                                                                                                                                                                                                                                                                                                                                                                                                                                                                                                                                                                                                                                                                                                             |   |          |          |          |   |          |          |          |   |          |          |          |   |          |          |          |   |          |          |          |   |          |          |          |   |          |          |          |   |          |          |          |   |          |          |         |   |          |          |         |   |          |          |          |   |          |          |          |   |          |          |          |   |          |          |          |   |          |          |          |   |          |          |          |   |          |          |          |   |          |          |          |    |          |          |          |    |          |          |          |   |          |          |          |   |          |          |          |   |          |          |          |   |          |          |          |   |          |          |         |   |          |          |         |   |          |          |         |   |          |          |         |
| H                                                                                                                                                       | -3.50963                                                                                                                                                                                                                                                                                                                                                                                                                                                                                                                                                                                                                                                                                                                                                                                                                                                                                                                                                                                                                                                                                                                                                                                                                                                                                                                                                                                                                                                                                                                                                                                                                                                                                                                                                                                                                                                                                                                                                                                                                                                               | -0.20478 | -0.14916 |          |          |   |          |          |          |   |          |          |          |   |          |         |          |   |          |         |          |   |          |          |          |   |          |          |          |   |          |         |          |   |          |          |         |   |          |          |         |   |          |          |         |   |          |          |         |   |          |         |         |   |          |          |         |   |          |          |         |   |          |          |          |   |          |          |         |   |          |          |          |    |          |          |          |    |          |          |         |   |          |          |          |   |          |          |          |   |          |          |          |   |          |          |          |   |          |         |          |   |          |          |          |                                                                                                                                                         |                                                                                                                                                                                                                                                                                                                                                                                                                                                                                                                                                                                                                                                                                                                                                                                                                                                                                                                                                                                                                                                                                                                                                                                                                                                                                                                                                                                                                                                                                                                                                                                                                                                                                                                                                                                                                                                                                                                                   |         |          |          |          |         |          |                                                                                                                                                        |                                                                                                                                                                                                                                                                                                                                                                                                                                                                                                                                                                                                                                                                                                                                                                                                                                                                                                                                                                                                                                                                                                                                                                                                                                                                                                                                                                                                                                                                                                                                                                                                                                                                                                                                                                                                                                                                                                                                                                                                                                                                             |   |          |          |          |   |          |          |          |   |          |          |          |   |          |          |          |   |          |          |          |   |          |          |          |   |          |          |          |   |          |          |          |   |          |          |         |   |          |          |         |   |          |          |          |   |          |          |          |   |          |          |          |   |          |          |          |   |          |          |          |   |          |          |          |   |          |          |          |   |          |          |          |    |          |          |          |    |          |          |          |   |          |          |          |   |          |          |          |   |          |          |          |   |          |          |          |   |          |          |         |   |          |          |         |   |          |          |         |   |          |          |         |
| H                                                                                                                                                       | -3.26758                                                                                                                                                                                                                                                                                                                                                                                                                                                                                                                                                                                                                                                                                                                                                                                                                                                                                                                                                                                                                                                                                                                                                                                                                                                                                                                                                                                                                                                                                                                                                                                                                                                                                                                                                                                                                                                                                                                                                                                                                                                               | -0.45695 | 1.60149  |          |          |   |          |          |          |   |          |          |          |   |          |         |          |   |          |         |          |   |          |          |          |   |          |          |          |   |          |         |          |   |          |          |         |   |          |          |         |   |          |          |         |   |          |          |         |   |          |         |         |   |          |          |         |   |          |          |         |   |          |          |          |   |          |          |         |   |          |          |          |    |          |          |          |    |          |          |         |   |          |          |          |   |          |          |          |   |          |          |          |   |          |          |          |   |          |         |          |   |          |          |          |                                                                                                                                                         |                                                                                                                                                                                                                                                                                                                                                                                                                                                                                                                                                                                                                                                                                                                                                                                                                                                                                                                                                                                                                                                                                                                                                                                                                                                                                                                                                                                                                                                                                                                                                                                                                                                                                                                                                                                                                                                                                                                                   |         |          |          |          |         |          |                                                                                                                                                        |                                                                                                                                                                                                                                                                                                                                                                                                                                                                                                                                                                                                                                                                                                                                                                                                                                                                                                                                                                                                                                                                                                                                                                                                                                                                                                                                                                                                                                                                                                                                                                                                                                                                                                                                                                                                                                                                                                                                                                                                                                                                             |   |          |          |          |   |          |          |          |   |          |          |          |   |          |          |          |   |          |          |          |   |          |          |          |   |          |          |          |   |          |          |          |   |          |          |         |   |          |          |         |   |          |          |          |   |          |          |          |   |          |          |          |   |          |          |          |   |          |          |          |   |          |          |          |   |          |          |          |   |          |          |          |    |          |          |          |    |          |          |          |   |          |          |          |   |          |          |          |   |          |          |          |   |          |          |          |   |          |          |         |   |          |          |         |   |          |          |         |   |          |          |         |
| H                                                                                                                                                       | -2.18806                                                                                                                                                                                                                                                                                                                                                                                                                                                                                                                                                                                                                                                                                                                                                                                                                                                                                                                                                                                                                                                                                                                                                                                                                                                                                                                                                                                                                                                                                                                                                                                                                                                                                                                                                                                                                                                                                                                                                                                                                                                               | -1.25578 | 0.42916  |          |          |   |          |          |          |   |          |          |          |   |          |         |          |   |          |         |          |   |          |          |          |   |          |          |          |   |          |         |          |   |          |          |         |   |          |          |         |   |          |          |         |   |          |          |         |   |          |         |         |   |          |          |         |   |          |          |         |   |          |          |          |   |          |          |         |   |          |          |          |    |          |          |          |    |          |          |         |   |          |          |          |   |          |          |          |   |          |          |          |   |          |          |          |   |          |         |          |   |          |          |          |                                                                                                                                                         |                                                                                                                                                                                                                                                                                                                                                                                                                                                                                                                                                                                                                                                                                                                                                                                                                                                                                                                                                                                                                                                                                                                                                                                                                                                                                                                                                                                                                                                                                                                                                                                                                                                                                                                                                                                                                                                                                                                                   |         |          |          |          |         |          |                                                                                                                                                        |                                                                                                                                                                                                                                                                                                                                                                                                                                                                                                                                                                                                                                                                                                                                                                                                                                                                                                                                                                                                                                                                                                                                                                                                                                                                                                                                                                                                                                                                                                                                                                                                                                                                                                                                                                                                                                                                                                                                                                                                                                                                             |   |          |          |          |   |          |          |          |   |          |          |          |   |          |          |          |   |          |          |          |   |          |          |          |   |          |          |          |   |          |          |          |   |          |          |         |   |          |          |         |   |          |          |          |   |          |          |          |   |          |          |          |   |          |          |          |   |          |          |          |   |          |          |          |   |          |          |          |   |          |          |          |    |          |          |          |    |          |          |          |   |          |          |          |   |          |          |          |   |          |          |          |   |          |          |          |   |          |          |         |   |          |          |         |   |          |          |         |   |          |          |         |
| O                                                                                                                                                       | 0.60698                                                                                                                                                                                                                                                                                                                                                                                                                                                                                                                                                                                                                                                                                                                                                                                                                                                                                                                                                                                                                                                                                                                                                                                                                                                                                                                                                                                                                                                                                                                                                                                                                                                                                                                                                                                                                                                                                                                                                                                                                                                                | -1.00390 | 4.18554  |          |          |   |          |          |          |   |          |          |          |   |          |         |          |   |          |         |          |   |          |          |          |   |          |          |          |   |          |         |          |   |          |          |         |   |          |          |         |   |          |          |         |   |          |          |         |   |          |         |         |   |          |          |         |   |          |          |         |   |          |          |          |   |          |          |         |   |          |          |          |    |          |          |          |    |          |          |         |   |          |          |          |   |          |          |          |   |          |          |          |   |          |          |          |   |          |         |          |   |          |          |          |                                                                                                                                                         |                                                                                                                                                                                                                                                                                                                                                                                                                                                                                                                                                                                                                                                                                                                                                                                                                                                                                                                                                                                                                                                                                                                                                                                                                                                                                                                                                                                                                                                                                                                                                                                                                                                                                                                                                                                                                                                                                                                                   |         |          |          |          |         |          |                                                                                                                                                        |                                                                                                                                                                                                                                                                                                                                                                                                                                                                                                                                                                                                                                                                                                                                                                                                                                                                                                                                                                                                                                                                                                                                                                                                                                                                                                                                                                                                                                                                                                                                                                                                                                                                                                                                                                                                                                                                                                                                                                                                                                                                             |   |          |          |          |   |          |          |          |   |          |          |          |   |          |          |          |   |          |          |          |   |          |          |          |   |          |          |          |   |          |          |          |   |          |          |         |   |          |          |         |   |          |          |          |   |          |          |          |   |          |          |          |   |          |          |          |   |          |          |          |   |          |          |          |   |          |          |          |   |          |          |          |    |          |          |          |    |          |          |          |   |          |          |          |   |          |          |          |   |          |          |          |   |          |          |          |   |          |          |         |   |          |          |         |   |          |          |         |   |          |          |         |
| C                                                                                                                                                       | 1.67631                                                                                                                                                                                                                                                                                                                                                                                                                                                                                                                                                                                                                                                                                                                                                                                                                                                                                                                                                                                                                                                                                                                                                                                                                                                                                                                                                                                                                                                                                                                                                                                                                                                                                                                                                                                                                                                                                                                                                                                                                                                                | -0.90674 | 5.11229  |          |          |   |          |          |          |   |          |          |          |   |          |         |          |   |          |         |          |   |          |          |          |   |          |          |          |   |          |         |          |   |          |          |         |   |          |          |         |   |          |          |         |   |          |          |         |   |          |         |         |   |          |          |         |   |          |          |         |   |          |          |          |   |          |          |         |   |          |          |          |    |          |          |          |    |          |          |         |   |          |          |          |   |          |          |          |   |          |          |          |   |          |          |          |   |          |         |          |   |          |          |          |                                                                                                                                                         |                                                                                                                                                                                                                                                                                                                                                                                                                                                                                                                                                                                                                                                                                                                                                                                                                                                                                                                                                                                                                                                                                                                                                                                                                                                                                                                                                                                                                                                                                                                                                                                                                                                                                                                                                                                                                                                                                                                                   |         |          |          |          |         |          |                                                                                                                                                        |                                                                                                                                                                                                                                                                                                                                                                                                                                                                                                                                                                                                                                                                                                                                                                                                                                                                                                                                                                                                                                                                                                                                                                                                                                                                                                                                                                                                                                                                                                                                                                                                                                                                                                                                                                                                                                                                                                                                                                                                                                                                             |   |          |          |          |   |          |          |          |   |          |          |          |   |          |          |          |   |          |          |          |   |          |          |          |   |          |          |          |   |          |          |          |   |          |          |         |   |          |          |         |   |          |          |          |   |          |          |          |   |          |          |          |   |          |          |          |   |          |          |          |   |          |          |          |   |          |          |          |   |          |          |          |    |          |          |          |    |          |          |          |   |          |          |          |   |          |          |          |   |          |          |          |   |          |          |          |   |          |          |         |   |          |          |         |   |          |          |         |   |          |          |         |
| H                                                                                                                                                       | 1.53964                                                                                                                                                                                                                                                                                                                                                                                                                                                                                                                                                                                                                                                                                                                                                                                                                                                                                                                                                                                                                                                                                                                                                                                                                                                                                                                                                                                                                                                                                                                                                                                                                                                                                                                                                                                                                                                                                                                                                                                                                                                                | -0.05236 | 5.78303  |          |          |   |          |          |          |   |          |          |          |   |          |         |          |   |          |         |          |   |          |          |          |   |          |          |          |   |          |         |          |   |          |          |         |   |          |          |         |   |          |          |         |   |          |          |         |   |          |         |         |   |          |          |         |   |          |          |         |   |          |          |          |   |          |          |         |   |          |          |          |    |          |          |          |    |          |          |         |   |          |          |          |   |          |          |          |   |          |          |          |   |          |          |          |   |          |         |          |   |          |          |          |                                                                                                                                                         |                                                                                                                                                                                                                                                                                                                                                                                                                                                                                                                                                                                                                                                                                                                                                                                                                                                                                                                                                                                                                                                                                                                                                                                                                                                                                                                                                                                                                                                                                                                                                                                                                                                                                                                                                                                                                                                                                                                                   |         |          |          |          |         |          |                                                                                                                                                        |                                                                                                                                                                                                                                                                                                                                                                                                                                                                                                                                                                                                                                                                                                                                                                                                                                                                                                                                                                                                                                                                                                                                                                                                                                                                                                                                                                                                                                                                                                                                                                                                                                                                                                                                                                                                                                                                                                                                                                                                                                                                             |   |          |          |          |   |          |          |          |   |          |          |          |   |          |          |          |   |          |          |          |   |          |          |          |   |          |          |          |   |          |          |          |   |          |          |         |   |          |          |         |   |          |          |          |   |          |          |          |   |          |          |          |   |          |          |          |   |          |          |          |   |          |          |          |   |          |          |          |   |          |          |          |    |          |          |          |    |          |          |          |   |          |          |          |   |          |          |          |   |          |          |          |   |          |          |          |   |          |          |         |   |          |          |         |   |          |          |         |   |          |          |         |
| H                                                                                                                                                       | 1.66467                                                                                                                                                                                                                                                                                                                                                                                                                                                                                                                                                                                                                                                                                                                                                                                                                                                                                                                                                                                                                                                                                                                                                                                                                                                                                                                                                                                                                                                                                                                                                                                                                                                                                                                                                                                                                                                                                                                                                                                                                                                                | -1.83054 | 5.68693  |          |          |   |          |          |          |   |          |          |          |   |          |         |          |   |          |         |          |   |          |          |          |   |          |          |          |   |          |         |          |   |          |          |         |   |          |          |         |   |          |          |         |   |          |          |         |   |          |         |         |   |          |          |         |   |          |          |         |   |          |          |          |   |          |          |         |   |          |          |          |    |          |          |          |    |          |          |         |   |          |          |          |   |          |          |          |   |          |          |          |   |          |          |          |   |          |         |          |   |          |          |          |                                                                                                                                                         |                                                                                                                                                                                                                                                                                                                                                                                                                                                                                                                                                                                                                                                                                                                                                                                                                                                                                                                                                                                                                                                                                                                                                                                                                                                                                                                                                                                                                                                                                                                                                                                                                                                                                                                                                                                                                                                                                                                                   |         |          |          |          |         |          |                                                                                                                                                        |                                                                                                                                                                                                                                                                                                                                                                                                                                                                                                                                                                                                                                                                                                                                                                                                                                                                                                                                                                                                                                                                                                                                                                                                                                                                                                                                                                                                                                                                                                                                                                                                                                                                                                                                                                                                                                                                                                                                                                                                                                                                             |   |          |          |          |   |          |          |          |   |          |          |          |   |          |          |          |   |          |          |          |   |          |          |          |   |          |          |          |   |          |          |          |   |          |          |         |   |          |          |         |   |          |          |          |   |          |          |          |   |          |          |          |   |          |          |          |   |          |          |          |   |          |          |          |   |          |          |          |   |          |          |          |    |          |          |          |    |          |          |          |   |          |          |          |   |          |          |          |   |          |          |          |   |          |          |          |   |          |          |         |   |          |          |         |   |          |          |         |   |          |          |         |
| H                                                                                                                                                       | 2.63634                                                                                                                                                                                                                                                                                                                                                                                                                                                                                                                                                                                                                                                                                                                                                                                                                                                                                                                                                                                                                                                                                                                                                                                                                                                                                                                                                                                                                                                                                                                                                                                                                                                                                                                                                                                                                                                                                                                                                                                                                                                                | -0.80426 | 4.59619  |          |          |   |          |          |          |   |          |          |          |   |          |         |          |   |          |         |          |   |          |          |          |   |          |          |          |   |          |         |          |   |          |          |         |   |          |          |         |   |          |          |         |   |          |          |         |   |          |         |         |   |          |          |         |   |          |          |         |   |          |          |          |   |          |          |         |   |          |          |          |    |          |          |          |    |          |          |         |   |          |          |          |   |          |          |          |   |          |          |          |   |          |          |          |   |          |         |          |   |          |          |          |                                                                                                                                                         |                                                                                                                                                                                                                                                                                                                                                                                                                                                                                                                                                                                                                                                                                                                                                                                                                                                                                                                                                                                                                                                                                                                                                                                                                                                                                                                                                                                                                                                                                                                                                                                                                                                                                                                                                                                                                                                                                                                                   |         |          |          |          |         |          |                                                                                                                                                        |                                                                                                                                                                                                                                                                                                                                                                                                                                                                                                                                                                                                                                                                                                                                                                                                                                                                                                                                                                                                                                                                                                                                                                                                                                                                                                                                                                                                                                                                                                                                                                                                                                                                                                                                                                                                                                                                                                                                                                                                                                                                             |   |          |          |          |   |          |          |          |   |          |          |          |   |          |          |          |   |          |          |          |   |          |          |          |   |          |          |          |   |          |          |          |   |          |          |         |   |          |          |         |   |          |          |          |   |          |          |          |   |          |          |          |   |          |          |          |   |          |          |          |   |          |          |          |   |          |          |          |   |          |          |          |    |          |          |          |    |          |          |          |   |          |          |          |   |          |          |          |   |          |          |          |   |          |          |          |   |          |          |         |   |          |          |         |   |          |          |         |   |          |          |         |
| O                                                                                                                                                       | -0.87906                                                                                                                                                                                                                                                                                                                                                                                                                                                                                                                                                                                                                                                                                                                                                                                                                                                                                                                                                                                                                                                                                                                                                                                                                                                                                                                                                                                                                                                                                                                                                                                                                                                                                                                                                                                                                                                                                                                                                                                                                                                               | 6.19878  | -2.32516 |          |          |   |          |          |          |   |          |          |          |   |          |         |          |   |          |         |          |   |          |          |          |   |          |          |          |   |          |         |          |   |          |          |         |   |          |          |         |   |          |          |         |   |          |          |         |   |          |         |         |   |          |          |         |   |          |          |         |   |          |          |          |   |          |          |         |   |          |          |          |    |          |          |          |    |          |          |         |   |          |          |          |   |          |          |          |   |          |          |          |   |          |          |          |   |          |         |          |   |          |          |          |                                                                                                                                                         |                                                                                                                                                                                                                                                                                                                                                                                                                                                                                                                                                                                                                                                                                                                                                                                                                                                                                                                                                                                                                                                                                                                                                                                                                                                                                                                                                                                                                                                                                                                                                                                                                                                                                                                                                                                                                                                                                                                                   |         |          |          |          |         |          |                                                                                                                                                        |                                                                                                                                                                                                                                                                                                                                                                                                                                                                                                                                                                                                                                                                                                                                                                                                                                                                                                                                                                                                                                                                                                                                                                                                                                                                                                                                                                                                                                                                                                                                                                                                                                                                                                                                                                                                                                                                                                                                                                                                                                                                             |   |          |          |          |   |          |          |          |   |          |          |          |   |          |          |          |   |          |          |          |   |          |          |          |   |          |          |          |   |          |          |          |   |          |          |         |   |          |          |         |   |          |          |          |   |          |          |          |   |          |          |          |   |          |          |          |   |          |          |          |   |          |          |          |   |          |          |          |   |          |          |          |    |          |          |          |    |          |          |          |   |          |          |          |   |          |          |          |   |          |          |          |   |          |          |          |   |          |          |         |   |          |          |         |   |          |          |         |   |          |          |         |
| C                                                                                                                                                       | -2.08967                                                                                                                                                                                                                                                                                                                                                                                                                                                                                                                                                                                                                                                                                                                                                                                                                                                                                                                                                                                                                                                                                                                                                                                                                                                                                                                                                                                                                                                                                                                                                                                                                                                                                                                                                                                                                                                                                                                                                                                                                                                               | 6.92952  | -2.41506 |          |          |   |          |          |          |   |          |          |          |   |          |         |          |   |          |         |          |   |          |          |          |   |          |          |          |   |          |         |          |   |          |          |         |   |          |          |         |   |          |          |         |   |          |          |         |   |          |         |         |   |          |          |         |   |          |          |         |   |          |          |          |   |          |          |         |   |          |          |          |    |          |          |          |    |          |          |         |   |          |          |          |   |          |          |          |   |          |          |          |   |          |          |          |   |          |         |          |   |          |          |          |                                                                                                                                                         |                                                                                                                                                                                                                                                                                                                                                                                                                                                                                                                                                                                                                                                                                                                                                                                                                                                                                                                                                                                                                                                                                                                                                                                                                                                                                                                                                                                                                                                                                                                                                                                                                                                                                                                                                                                                                                                                                                                                   |         |          |          |          |         |          |                                                                                                                                                        |                                                                                                                                                                                                                                                                                                                                                                                                                                                                                                                                                                                                                                                                                                                                                                                                                                                                                                                                                                                                                                                                                                                                                                                                                                                                                                                                                                                                                                                                                                                                                                                                                                                                                                                                                                                                                                                                                                                                                                                                                                                                             |   |          |          |          |   |          |          |          |   |          |          |          |   |          |          |          |   |          |          |          |   |          |          |          |   |          |          |          |   |          |          |          |   |          |          |         |   |          |          |         |   |          |          |          |   |          |          |          |   |          |          |          |   |          |          |          |   |          |          |          |   |          |          |          |   |          |          |          |   |          |          |          |    |          |          |          |    |          |          |          |   |          |          |          |   |          |          |          |   |          |          |          |   |          |          |          |   |          |          |         |   |          |          |         |   |          |          |         |   |          |          |         |
| H                                                                                                                                                       | -2.29552                                                                                                                                                                                                                                                                                                                                                                                                                                                                                                                                                                                                                                                                                                                                                                                                                                                                                                                                                                                                                                                                                                                                                                                                                                                                                                                                                                                                                                                                                                                                                                                                                                                                                                                                                                                                                                                                                                                                                                                                                                                               | 7.47000  | -1.48509 |          |          |   |          |          |          |   |          |          |          |   |          |         |          |   |          |         |          |   |          |          |          |   |          |          |          |   |          |         |          |   |          |          |         |   |          |          |         |   |          |          |         |   |          |          |         |   |          |         |         |   |          |          |         |   |          |          |         |   |          |          |          |   |          |          |         |   |          |          |          |    |          |          |          |    |          |          |         |   |          |          |          |   |          |          |          |   |          |          |          |   |          |          |          |   |          |         |          |   |          |          |          |                                                                                                                                                         |                                                                                                                                                                                                                                                                                                                                                                                                                                                                                                                                                                                                                                                                                                                                                                                                                                                                                                                                                                                                                                                                                                                                                                                                                                                                                                                                                                                                                                                                                                                                                                                                                                                                                                                                                                                                                                                                                                                                   |         |          |          |          |         |          |                                                                                                                                                        |                                                                                                                                                                                                                                                                                                                                                                                                                                                                                                                                                                                                                                                                                                                                                                                                                                                                                                                                                                                                                                                                                                                                                                                                                                                                                                                                                                                                                                                                                                                                                                                                                                                                                                                                                                                                                                                                                                                                                                                                                                                                             |   |          |          |          |   |          |          |          |   |          |          |          |   |          |          |          |   |          |          |          |   |          |          |          |   |          |          |          |   |          |          |          |   |          |          |         |   |          |          |         |   |          |          |          |   |          |          |          |   |          |          |          |   |          |          |          |   |          |          |          |   |          |          |          |   |          |          |          |   |          |          |          |    |          |          |          |    |          |          |          |   |          |          |          |   |          |          |          |   |          |          |          |   |          |          |          |   |          |          |         |   |          |          |         |   |          |          |         |   |          |          |         |
| H                                                                                                                                                       | -1.95688                                                                                                                                                                                                                                                                                                                                                                                                                                                                                                                                                                                                                                                                                                                                                                                                                                                                                                                                                                                                                                                                                                                                                                                                                                                                                                                                                                                                                                                                                                                                                                                                                                                                                                                                                                                                                                                                                                                                                                                                                                                               | 7.63919  | -3.22920 |          |          |   |          |          |          |   |          |          |          |   |          |         |          |   |          |         |          |   |          |          |          |   |          |          |          |   |          |         |          |   |          |          |         |   |          |          |         |   |          |          |         |   |          |          |         |   |          |         |         |   |          |          |         |   |          |          |         |   |          |          |          |   |          |          |         |   |          |          |          |    |          |          |          |    |          |          |         |   |          |          |          |   |          |          |          |   |          |          |          |   |          |          |          |   |          |         |          |   |          |          |          |                                                                                                                                                         |                                                                                                                                                                                                                                                                                                                                                                                                                                                                                                                                                                                                                                                                                                                                                                                                                                                                                                                                                                                                                                                                                                                                                                                                                                                                                                                                                                                                                                                                                                                                                                                                                                                                                                                                                                                                                                                                                                                                   |         |          |          |          |         |          |                                                                                                                                                        |                                                                                                                                                                                                                                                                                                                                                                                                                                                                                                                                                                                                                                                                                                                                                                                                                                                                                                                                                                                                                                                                                                                                                                                                                                                                                                                                                                                                                                                                                                                                                                                                                                                                                                                                                                                                                                                                                                                                                                                                                                                                             |   |          |          |          |   |          |          |          |   |          |          |          |   |          |          |          |   |          |          |          |   |          |          |          |   |          |          |          |   |          |          |          |   |          |          |         |   |          |          |         |   |          |          |          |   |          |          |          |   |          |          |          |   |          |          |          |   |          |          |          |   |          |          |          |   |          |          |          |   |          |          |          |    |          |          |          |    |          |          |          |   |          |          |          |   |          |          |          |   |          |          |          |   |          |          |          |   |          |          |         |   |          |          |         |   |          |          |         |   |          |          |         |
| H                                                                                                                                                       | -2.93464                                                                                                                                                                                                                                                                                                                                                                                                                                                                                                                                                                                                                                                                                                                                                                                                                                                                                                                                                                                                                                                                                                                                                                                                                                                                                                                                                                                                                                                                                                                                                                                                                                                                                                                                                                                                                                                                                                                                                                                                                                                               | 6.26868  | -2.63566 |          |          |   |          |          |          |   |          |          |          |   |          |         |          |   |          |         |          |   |          |          |          |   |          |          |          |   |          |         |          |   |          |          |         |   |          |          |         |   |          |          |         |   |          |          |         |   |          |         |         |   |          |          |         |   |          |          |         |   |          |          |          |   |          |          |         |   |          |          |          |    |          |          |          |    |          |          |         |   |          |          |          |   |          |          |          |   |          |          |          |   |          |          |          |   |          |         |          |   |          |          |          |                                                                                                                                                         |                                                                                                                                                                                                                                                                                                                                                                                                                                                                                                                                                                                                                                                                                                                                                                                                                                                                                                                                                                                                                                                                                                                                                                                                                                                                                                                                                                                                                                                                                                                                                                                                                                                                                                                                                                                                                                                                                                                                   |         |          |          |          |         |          |                                                                                                                                                        |                                                                                                                                                                                                                                                                                                                                                                                                                                                                                                                                                                                                                                                                                                                                                                                                                                                                                                                                                                                                                                                                                                                                                                                                                                                                                                                                                                                                                                                                                                                                                                                                                                                                                                                                                                                                                                                                                                                                                                                                                                                                             |   |          |          |          |   |          |          |          |   |          |          |          |   |          |          |          |   |          |          |          |   |          |          |          |   |          |          |          |   |          |          |          |   |          |          |         |   |          |          |         |   |          |          |          |   |          |          |          |   |          |          |          |   |          |          |          |   |          |          |          |   |          |          |          |   |          |          |          |   |          |          |          |    |          |          |          |    |          |          |          |   |          |          |          |   |          |          |          |   |          |          |          |   |          |          |          |   |          |          |         |   |          |          |         |   |          |          |         |   |          |          |         |
| H                                                                                                                                                       | 0.14544                                                                                                                                                                                                                                                                                                                                                                                                                                                                                                                                                                                                                                                                                                                                                                                                                                                                                                                                                                                                                                                                                                                                                                                                                                                                                                                                                                                                                                                                                                                                                                                                                                                                                                                                                                                                                                                                                                                                                                                                                                                                | 2.19080  | 3.37174  |          |          |   |          |          |          |   |          |          |          |   |          |         |          |   |          |         |          |   |          |          |          |   |          |          |          |   |          |         |          |   |          |          |         |   |          |          |         |   |          |          |         |   |          |          |         |   |          |         |         |   |          |          |         |   |          |          |         |   |          |          |          |   |          |          |         |   |          |          |          |    |          |          |          |    |          |          |         |   |          |          |          |   |          |          |          |   |          |          |          |   |          |          |          |   |          |         |          |   |          |          |          |                                                                                                                                                         |                                                                                                                                                                                                                                                                                                                                                                                                                                                                                                                                                                                                                                                                                                                                                                                                                                                                                                                                                                                                                                                                                                                                                                                                                                                                                                                                                                                                                                                                                                                                                                                                                                                                                                                                                                                                                                                                                                                                   |         |          |          |          |         |          |                                                                                                                                                        |                                                                                                                                                                                                                                                                                                                                                                                                                                                                                                                                                                                                                                                                                                                                                                                                                                                                                                                                                                                                                                                                                                                                                                                                                                                                                                                                                                                                                                                                                                                                                                                                                                                                                                                                                                                                                                                                                                                                                                                                                                                                             |   |          |          |          |   |          |          |          |   |          |          |          |   |          |          |          |   |          |          |          |   |          |          |          |   |          |          |          |   |          |          |          |   |          |          |         |   |          |          |         |   |          |          |          |   |          |          |          |   |          |          |          |   |          |          |          |   |          |          |          |   |          |          |          |   |          |          |          |   |          |          |          |    |          |          |          |    |          |          |          |   |          |          |          |   |          |          |          |   |          |          |          |   |          |          |          |   |          |          |         |   |          |          |         |   |          |          |         |   |          |          |         |
| H                                                                                                                                                       | -0.04629                                                                                                                                                                                                                                                                                                                                                                                                                                                                                                                                                                                                                                                                                                                                                                                                                                                                                                                                                                                                                                                                                                                                                                                                                                                                                                                                                                                                                                                                                                                                                                                                                                                                                                                                                                                                                                                                                                                                                                                                                                                               | -2.05250 | 3.64236  |          |          |   |          |          |          |   |          |          |          |   |          |         |          |   |          |         |          |   |          |          |          |   |          |          |          |   |          |         |          |   |          |          |         |   |          |          |         |   |          |          |         |   |          |          |         |   |          |         |         |   |          |          |         |   |          |          |         |   |          |          |          |   |          |          |         |   |          |          |          |    |          |          |          |    |          |          |         |   |          |          |          |   |          |          |          |   |          |          |          |   |          |          |          |   |          |         |          |   |          |          |          |                                                                                                                                                         |                                                                                                                                                                                                                                                                                                                                                                                                                                                                                                                                                                                                                                                                                                                                                                                                                                                                                                                                                                                                                                                                                                                                                                                                                                                                                                                                                                                                                                                                                                                                                                                                                                                                                                                                                                                                                                                                                                                                   |         |          |          |          |         |          |                                                                                                                                                        |                                                                                                                                                                                                                                                                                                                                                                                                                                                                                                                                                                                                                                                                                                                                                                                                                                                                                                                                                                                                                                                                                                                                                                                                                                                                                                                                                                                                                                                                                                                                                                                                                                                                                                                                                                                                                                                                                                                                                                                                                                                                             |   |          |          |          |   |          |          |          |   |          |          |          |   |          |          |          |   |          |          |          |   |          |          |          |   |          |          |          |   |          |          |          |   |          |          |         |   |          |          |         |   |          |          |          |   |          |          |          |   |          |          |          |   |          |          |          |   |          |          |          |   |          |          |          |   |          |          |          |   |          |          |          |    |          |          |          |    |          |          |          |   |          |          |          |   |          |          |          |   |          |          |          |   |          |          |          |   |          |          |         |   |          |          |         |   |          |          |         |   |          |          |         |
| C                                                                                                                                                       | 0.13740                                                                                                                                                                                                                                                                                                                                                                                                                                                                                                                                                                                                                                                                                                                                                                                                                                                                                                                                                                                                                                                                                                                                                                                                                                                                                                                                                                                                                                                                                                                                                                                                                                                                                                                                                                                                                                                                                                                                                                                                                                                                | 2.51008  | -1.17219 |          |          |   |          |          |          |   |          |          |          |   |          |         |          |   |          |         |          |   |          |          |          |   |          |          |          |   |          |         |          |   |          |          |         |   |          |          |         |   |          |          |         |   |          |          |         |   |          |         |         |   |          |          |         |   |          |          |         |   |          |          |          |   |          |          |         |   |          |          |          |    |          |          |          |    |          |          |         |   |          |          |          |   |          |          |          |   |          |          |          |   |          |          |          |   |          |         |          |   |          |          |          |                                                                                                                                                         |                                                                                                                                                                                                                                                                                                                                                                                                                                                                                                                                                                                                                                                                                                                                                                                                                                                                                                                                                                                                                                                                                                                                                                                                                                                                                                                                                                                                                                                                                                                                                                                                                                                                                                                                                                                                                                                                                                                                   |         |          |          |          |         |          |                                                                                                                                                        |                                                                                                                                                                                                                                                                                                                                                                                                                                                                                                                                                                                                                                                                                                                                                                                                                                                                                                                                                                                                                                                                                                                                                                                                                                                                                                                                                                                                                                                                                                                                                                                                                                                                                                                                                                                                                                                                                                                                                                                                                                                                             |   |          |          |          |   |          |          |          |   |          |          |          |   |          |          |          |   |          |          |          |   |          |          |          |   |          |          |          |   |          |          |          |   |          |          |         |   |          |          |         |   |          |          |          |   |          |          |          |   |          |          |          |   |          |          |          |   |          |          |          |   |          |          |          |   |          |          |          |   |          |          |          |    |          |          |          |    |          |          |          |   |          |          |          |   |          |          |          |   |          |          |          |   |          |          |          |   |          |          |         |   |          |          |         |   |          |          |         |   |          |          |         |
| H                                                                                                                                                       | 0.83643                                                                                                                                                                                                                                                                                                                                                                                                                                                                                                                                                                                                                                                                                                                                                                                                                                                                                                                                                                                                                                                                                                                                                                                                                                                                                                                                                                                                                                                                                                                                                                                                                                                                                                                                                                                                                                                                                                                                                                                                                                                                | 2.61575  | -0.34613 |          |          |   |          |          |          |   |          |          |          |   |          |         |          |   |          |         |          |   |          |          |          |   |          |          |          |   |          |         |          |   |          |          |         |   |          |          |         |   |          |          |         |   |          |          |         |   |          |         |         |   |          |          |         |   |          |          |         |   |          |          |          |   |          |          |         |   |          |          |          |    |          |          |          |    |          |          |         |   |          |          |          |   |          |          |          |   |          |          |          |   |          |          |          |   |          |         |          |   |          |          |          |                                                                                                                                                         |                                                                                                                                                                                                                                                                                                                                                                                                                                                                                                                                                                                                                                                                                                                                                                                                                                                                                                                                                                                                                                                                                                                                                                                                                                                                                                                                                                                                                                                                                                                                                                                                                                                                                                                                                                                                                                                                                                                                   |         |          |          |          |         |          |                                                                                                                                                        |                                                                                                                                                                                                                                                                                                                                                                                                                                                                                                                                                                                                                                                                                                                                                                                                                                                                                                                                                                                                                                                                                                                                                                                                                                                                                                                                                                                                                                                                                                                                                                                                                                                                                                                                                                                                                                                                                                                                                                                                                                                                             |   |          |          |          |   |          |          |          |   |          |          |          |   |          |          |          |   |          |          |          |   |          |          |          |   |          |          |          |   |          |          |          |   |          |          |         |   |          |          |         |   |          |          |          |   |          |          |          |   |          |          |          |   |          |          |          |   |          |          |          |   |          |          |          |   |          |          |          |   |          |          |          |    |          |          |          |    |          |          |          |   |          |          |          |   |          |          |          |   |          |          |          |   |          |          |          |   |          |          |         |   |          |          |         |   |          |          |         |   |          |          |         |
| H                                                                                                                                                       | 0.01812                                                                                                                                                                                                                                                                                                                                                                                                                                                                                                                                                                                                                                                                                                                                                                                                                                                                                                                                                                                                                                                                                                                                                                                                                                                                                                                                                                                                                                                                                                                                                                                                                                                                                                                                                                                                                                                                                                                                                                                                                                                                | -2.53423 | -3.14646 |          |          |   |          |          |          |   |          |          |          |   |          |         |          |   |          |         |          |   |          |          |          |   |          |          |          |   |          |         |          |   |          |          |         |   |          |          |         |   |          |          |         |   |          |          |         |   |          |         |         |   |          |          |         |   |          |          |         |   |          |          |          |   |          |          |         |   |          |          |          |    |          |          |          |    |          |          |         |   |          |          |          |   |          |          |          |   |          |          |          |   |          |          |          |   |          |         |          |   |          |          |          |                                                                                                                                                         |                                                                                                                                                                                                                                                                                                                                                                                                                                                                                                                                                                                                                                                                                                                                                                                                                                                                                                                                                                                                                                                                                                                                                                                                                                                                                                                                                                                                                                                                                                                                                                                                                                                                                                                                                                                                                                                                                                                                   |         |          |          |          |         |          |                                                                                                                                                        |                                                                                                                                                                                                                                                                                                                                                                                                                                                                                                                                                                                                                                                                                                                                                                                                                                                                                                                                                                                                                                                                                                                                                                                                                                                                                                                                                                                                                                                                                                                                                                                                                                                                                                                                                                                                                                                                                                                                                                                                                                                                             |   |          |          |          |   |          |          |          |   |          |          |          |   |          |          |          |   |          |          |          |   |          |          |          |   |          |          |          |   |          |          |          |   |          |          |         |   |          |          |         |   |          |          |          |   |          |          |          |   |          |          |          |   |          |          |          |   |          |          |          |   |          |          |          |   |          |          |          |   |          |          |          |    |          |          |          |    |          |          |          |   |          |          |          |   |          |          |          |   |          |          |          |   |          |          |          |   |          |          |         |   |          |          |         |   |          |          |         |   |          |          |         |
| O                                                                                                                                                       | -0.07743                                                                                                                                                                                                                                                                                                                                                                                                                                                                                                                                                                                                                                                                                                                                                                                                                                                                                                                                                                                                                                                                                                                                                                                                                                                                                                                                                                                                                                                                                                                                                                                                                                                                                                                                                                                                                                                                                                                                                                                                                                                               | -2.49964 | 1.07931  |          |          |   |          |          |          |   |          |          |          |   |          |         |          |   |          |         |          |   |          |          |          |   |          |          |          |   |          |         |          |   |          |          |         |   |          |          |         |   |          |          |         |   |          |          |         |   |          |         |         |   |          |          |         |   |          |          |         |   |          |          |          |   |          |          |         |   |          |          |          |    |          |          |          |    |          |          |         |   |          |          |          |   |          |          |          |   |          |          |          |   |          |          |          |   |          |         |          |   |          |          |          |                                                                                                                                                         |                                                                                                                                                                                                                                                                                                                                                                                                                                                                                                                                                                                                                                                                                                                                                                                                                                                                                                                                                                                                                                                                                                                                                                                                                                                                                                                                                                                                                                                                                                                                                                                                                                                                                                                                                                                                                                                                                                                                   |         |          |          |          |         |          |                                                                                                                                                        |                                                                                                                                                                                                                                                                                                                                                                                                                                                                                                                                                                                                                                                                                                                                                                                                                                                                                                                                                                                                                                                                                                                                                                                                                                                                                                                                                                                                                                                                                                                                                                                                                                                                                                                                                                                                                                                                                                                                                                                                                                                                             |   |          |          |          |   |          |          |          |   |          |          |          |   |          |          |          |   |          |          |          |   |          |          |          |   |          |          |          |   |          |          |          |   |          |          |         |   |          |          |         |   |          |          |          |   |          |          |          |   |          |          |          |   |          |          |          |   |          |          |          |   |          |          |          |   |          |          |          |   |          |          |          |    |          |          |          |    |          |          |          |   |          |          |          |   |          |          |          |   |          |          |          |   |          |          |          |   |          |          |         |   |          |          |         |   |          |          |         |   |          |          |         |
| C                                                                                                                                                       | -0.16038                                                                                                                                                                                                                                                                                                                                                                                                                                                                                                                                                                                                                                                                                                                                                                                                                                                                                                                                                                                                                                                                                                                                                                                                                                                                                                                                                                                                                                                                                                                                                                                                                                                                                                                                                                                                                                                                                                                                                                                                                                                               | -3.65364 | 1.89652  |          |          |   |          |          |          |   |          |          |          |   |          |         |          |   |          |         |          |   |          |          |          |   |          |          |          |   |          |         |          |   |          |          |         |   |          |          |         |   |          |          |         |   |          |          |         |   |          |         |         |   |          |          |         |   |          |          |         |   |          |          |          |   |          |          |         |   |          |          |          |    |          |          |          |    |          |          |         |   |          |          |          |   |          |          |          |   |          |          |          |   |          |          |          |   |          |         |          |   |          |          |          |                                                                                                                                                         |                                                                                                                                                                                                                                                                                                                                                                                                                                                                                                                                                                                                                                                                                                                                                                                                                                                                                                                                                                                                                                                                                                                                                                                                                                                                                                                                                                                                                                                                                                                                                                                                                                                                                                                                                                                                                                                                                                                                   |         |          |          |          |         |          |                                                                                                                                                        |                                                                                                                                                                                                                                                                                                                                                                                                                                                                                                                                                                                                                                                                                                                                                                                                                                                                                                                                                                                                                                                                                                                                                                                                                                                                                                                                                                                                                                                                                                                                                                                                                                                                                                                                                                                                                                                                                                                                                                                                                                                                             |   |          |          |          |   |          |          |          |   |          |          |          |   |          |          |          |   |          |          |          |   |          |          |          |   |          |          |          |   |          |          |          |   |          |          |         |   |          |          |         |   |          |          |          |   |          |          |          |   |          |          |          |   |          |          |          |   |          |          |          |   |          |          |          |   |          |          |          |   |          |          |          |    |          |          |          |    |          |          |          |   |          |          |          |   |          |          |          |   |          |          |          |   |          |          |          |   |          |          |         |   |          |          |         |   |          |          |         |   |          |          |         |
| H                                                                                                                                                       | -1.05512                                                                                                                                                                                                                                                                                                                                                                                                                                                                                                                                                                                                                                                                                                                                                                                                                                                                                                                                                                                                                                                                                                                                                                                                                                                                                                                                                                                                                                                                                                                                                                                                                                                                                                                                                                                                                                                                                                                                                                                                                                                               | -3.63084 | 2.52577  |          |          |   |          |          |          |   |          |          |          |   |          |         |          |   |          |         |          |   |          |          |          |   |          |          |          |   |          |         |          |   |          |          |         |   |          |          |         |   |          |          |         |   |          |          |         |   |          |         |         |   |          |          |         |   |          |          |         |   |          |          |          |   |          |          |         |   |          |          |          |    |          |          |          |    |          |          |         |   |          |          |          |   |          |          |          |   |          |          |          |   |          |          |          |   |          |         |          |   |          |          |          |                                                                                                                                                         |                                                                                                                                                                                                                                                                                                                                                                                                                                                                                                                                                                                                                                                                                                                                                                                                                                                                                                                                                                                                                                                                                                                                                                                                                                                                                                                                                                                                                                                                                                                                                                                                                                                                                                                                                                                                                                                                                                                                   |         |          |          |          |         |          |                                                                                                                                                        |                                                                                                                                                                                                                                                                                                                                                                                                                                                                                                                                                                                                                                                                                                                                                                                                                                                                                                                                                                                                                                                                                                                                                                                                                                                                                                                                                                                                                                                                                                                                                                                                                                                                                                                                                                                                                                                                                                                                                                                                                                                                             |   |          |          |          |   |          |          |          |   |          |          |          |   |          |          |          |   |          |          |          |   |          |          |          |   |          |          |          |   |          |          |          |   |          |          |         |   |          |          |         |   |          |          |          |   |          |          |          |   |          |          |          |   |          |          |          |   |          |          |          |   |          |          |          |   |          |          |          |   |          |          |          |    |          |          |          |    |          |          |          |   |          |          |          |   |          |          |          |   |          |          |          |   |          |          |          |   |          |          |         |   |          |          |         |   |          |          |         |   |          |          |         |
| H                                                                                                                                                       | 0.72447                                                                                                                                                                                                                                                                                                                                                                                                                                                                                                                                                                                                                                                                                                                                                                                                                                                                                                                                                                                                                                                                                                                                                                                                                                                                                                                                                                                                                                                                                                                                                                                                                                                                                                                                                                                                                                                                                                                                                                                                                                                                | -3.75538 | 2.53195  |          |          |   |          |          |          |   |          |          |          |   |          |         |          |   |          |         |          |   |          |          |          |   |          |          |          |   |          |         |          |   |          |          |         |   |          |          |         |   |          |          |         |   |          |          |         |   |          |         |         |   |          |          |         |   |          |          |         |   |          |          |          |   |          |          |         |   |          |          |          |    |          |          |          |    |          |          |         |   |          |          |          |   |          |          |          |   |          |          |          |   |          |          |          |   |          |         |          |   |          |          |          |                                                                                                                                                         |                                                                                                                                                                                                                                                                                                                                                                                                                                                                                                                                                                                                                                                                                                                                                                                                                                                                                                                                                                                                                                                                                                                                                                                                                                                                                                                                                                                                                                                                                                                                                                                                                                                                                                                                                                                                                                                                                                                                   |         |          |          |          |         |          |                                                                                                                                                        |                                                                                                                                                                                                                                                                                                                                                                                                                                                                                                                                                                                                                                                                                                                                                                                                                                                                                                                                                                                                                                                                                                                                                                                                                                                                                                                                                                                                                                                                                                                                                                                                                                                                                                                                                                                                                                                                                                                                                                                                                                                                             |   |          |          |          |   |          |          |          |   |          |          |          |   |          |          |          |   |          |          |          |   |          |          |          |   |          |          |          |   |          |          |          |   |          |          |         |   |          |          |         |   |          |          |          |   |          |          |          |   |          |          |          |   |          |          |          |   |          |          |          |   |          |          |          |   |          |          |          |   |          |          |          |    |          |          |          |    |          |          |          |   |          |          |          |   |          |          |          |   |          |          |          |   |          |          |          |   |          |          |         |   |          |          |         |   |          |          |         |   |          |          |         |
| H                                                                                                                                                       | -0.21667                                                                                                                                                                                                                                                                                                                                                                                                                                                                                                                                                                                                                                                                                                                                                                                                                                                                                                                                                                                                                                                                                                                                                                                                                                                                                                                                                                                                                                                                                                                                                                                                                                                                                                                                                                                                                                                                                                                                                                                                                                                               | -4.49608 | 1.20968  |          |          |   |          |          |          |   |          |          |          |   |          |         |          |   |          |         |          |   |          |          |          |   |          |          |          |   |          |         |          |   |          |          |         |   |          |          |         |   |          |          |         |   |          |          |         |   |          |         |         |   |          |          |         |   |          |          |         |   |          |          |          |   |          |          |         |   |          |          |          |    |          |          |          |    |          |          |         |   |          |          |          |   |          |          |          |   |          |          |          |   |          |          |          |   |          |         |          |   |          |          |          |                                                                                                                                                         |                                                                                                                                                                                                                                                                                                                                                                                                                                                                                                                                                                                                                                                                                                                                                                                                                                                                                                                                                                                                                                                                                                                                                                                                                                                                                                                                                                                                                                                                                                                                                                                                                                                                                                                                                                                                                                                                                                                                   |         |          |          |          |         |          |                                                                                                                                                        |                                                                                                                                                                                                                                                                                                                                                                                                                                                                                                                                                                                                                                                                                                                                                                                                                                                                                                                                                                                                                                                                                                                                                                                                                                                                                                                                                                                                                                                                                                                                                                                                                                                                                                                                                                                                                                                                                                                                                                                                                                                                             |   |          |          |          |   |          |          |          |   |          |          |          |   |          |          |          |   |          |          |          |   |          |          |          |   |          |          |          |   |          |          |          |   |          |          |         |   |          |          |         |   |          |          |          |   |          |          |          |   |          |          |          |   |          |          |          |   |          |          |          |   |          |          |          |   |          |          |          |   |          |          |          |    |          |          |          |    |          |          |          |   |          |          |          |   |          |          |          |   |          |          |          |   |          |          |          |   |          |          |         |   |          |          |         |   |          |          |         |   |          |          |         |
| C                                                                                                                                                       | -1.27101                                                                                                                                                                                                                                                                                                                                                                                                                                                                                                                                                                                                                                                                                                                                                                                                                                                                                                                                                                                                                                                                                                                                                                                                                                                                                                                                                                                                                                                                                                                                                                                                                                                                                                                                                                                                                                                                                                                                                                                                                                                               | 2.95326  | -0.73635 |          |          |   |          |          |          |   |          |          |          |   |          |         |          |   |          |         |          |   |          |          |          |   |          |          |          |   |          |         |          |   |          |          |         |   |          |          |         |   |          |          |         |   |          |          |         |   |          |         |         |   |          |          |         |   |          |          |         |   |          |          |          |   |          |          |         |   |          |          |          |    |          |          |          |    |          |          |         |   |          |          |          |   |          |          |          |   |          |          |          |   |          |          |          |   |          |         |          |   |          |          |          |                                                                                                                                                         |                                                                                                                                                                                                                                                                                                                                                                                                                                                                                                                                                                                                                                                                                                                                                                                                                                                                                                                                                                                                                                                                                                                                                                                                                                                                                                                                                                                                                                                                                                                                                                                                                                                                                                                                                                                                                                                                                                                                   |         |          |          |          |         |          |                                                                                                                                                        |                                                                                                                                                                                                                                                                                                                                                                                                                                                                                                                                                                                                                                                                                                                                                                                                                                                                                                                                                                                                                                                                                                                                                                                                                                                                                                                                                                                                                                                                                                                                                                                                                                                                                                                                                                                                                                                                                                                                                                                                                                                                             |   |          |          |          |   |          |          |          |   |          |          |          |   |          |          |          |   |          |          |          |   |          |          |          |   |          |          |          |   |          |          |          |   |          |          |         |   |          |          |         |   |          |          |          |   |          |          |          |   |          |          |          |   |          |          |          |   |          |          |          |   |          |          |          |   |          |          |          |   |          |          |          |    |          |          |          |    |          |          |          |   |          |          |          |   |          |          |          |   |          |          |          |   |          |          |          |   |          |          |         |   |          |          |         |   |          |          |         |   |          |          |         |
| H                                                                                                                                                       | -1.92266                                                                                                                                                                                                                                                                                                                                                                                                                                                                                                                                                                                                                                                                                                                                                                                                                                                                                                                                                                                                                                                                                                                                                                                                                                                                                                                                                                                                                                                                                                                                                                                                                                                                                                                                                                                                                                                                                                                                                                                                                                                               | 2.96380  | -1.61308 |          |          |   |          |          |          |   |          |          |          |   |          |         |          |   |          |         |          |   |          |          |          |   |          |          |          |   |          |         |          |   |          |          |         |   |          |          |         |   |          |          |         |   |          |          |         |   |          |         |         |   |          |          |         |   |          |          |         |   |          |          |          |   |          |          |         |   |          |          |          |    |          |          |          |    |          |          |         |   |          |          |          |   |          |          |          |   |          |          |          |   |          |          |          |   |          |         |          |   |          |          |          |                                                                                                                                                         |                                                                                                                                                                                                                                                                                                                                                                                                                                                                                                                                                                                                                                                                                                                                                                                                                                                                                                                                                                                                                                                                                                                                                                                                                                                                                                                                                                                                                                                                                                                                                                                                                                                                                                                                                                                                                                                                                                                                   |         |          |          |          |         |          |                                                                                                                                                        |                                                                                                                                                                                                                                                                                                                                                                                                                                                                                                                                                                                                                                                                                                                                                                                                                                                                                                                                                                                                                                                                                                                                                                                                                                                                                                                                                                                                                                                                                                                                                                                                                                                                                                                                                                                                                                                                                                                                                                                                                                                                             |   |          |          |          |   |          |          |          |   |          |          |          |   |          |          |          |   |          |          |          |   |          |          |          |   |          |          |          |   |          |          |          |   |          |          |         |   |          |          |         |   |          |          |          |   |          |          |          |   |          |          |          |   |          |          |          |   |          |          |          |   |          |          |          |   |          |          |          |   |          |          |          |    |          |          |          |    |          |          |          |   |          |          |          |   |          |          |          |   |          |          |          |   |          |          |          |   |          |          |         |   |          |          |         |   |          |          |         |   |          |          |         |
| H                                                                                                                                                       | -1.24770                                                                                                                                                                                                                                                                                                                                                                                                                                                                                                                                                                                                                                                                                                                                                                                                                                                                                                                                                                                                                                                                                                                                                                                                                                                                                                                                                                                                                                                                                                                                                                                                                                                                                                                                                                                                                                                                                                                                                                                                                                                               | 3.96160  | -0.31431 |          |          |   |          |          |          |   |          |          |          |   |          |         |          |   |          |         |          |   |          |          |          |   |          |          |          |   |          |         |          |   |          |          |         |   |          |          |         |   |          |          |         |   |          |          |         |   |          |         |         |   |          |          |         |   |          |          |         |   |          |          |          |   |          |          |         |   |          |          |          |    |          |          |          |    |          |          |         |   |          |          |          |   |          |          |          |   |          |          |          |   |          |          |          |   |          |         |          |   |          |          |          |                                                                                                                                                         |                                                                                                                                                                                                                                                                                                                                                                                                                                                                                                                                                                                                                                                                                                                                                                                                                                                                                                                                                                                                                                                                                                                                                                                                                                                                                                                                                                                                                                                                                                                                                                                                                                                                                                                                                                                                                                                                                                                                   |         |          |          |          |         |          |                                                                                                                                                        |                                                                                                                                                                                                                                                                                                                                                                                                                                                                                                                                                                                                                                                                                                                                                                                                                                                                                                                                                                                                                                                                                                                                                                                                                                                                                                                                                                                                                                                                                                                                                                                                                                                                                                                                                                                                                                                                                                                                                                                                                                                                             |   |          |          |          |   |          |          |          |   |          |          |          |   |          |          |          |   |          |          |          |   |          |          |          |   |          |          |          |   |          |          |          |   |          |          |         |   |          |          |         |   |          |          |          |   |          |          |          |   |          |          |          |   |          |          |          |   |          |          |          |   |          |          |          |   |          |          |          |   |          |          |          |    |          |          |          |    |          |          |          |   |          |          |          |   |          |          |          |   |          |          |          |   |          |          |          |   |          |          |         |   |          |          |         |   |          |          |         |   |          |          |         |
| H                                                                                                                                                       | -1.70812                                                                                                                                                                                                                                                                                                                                                                                                                                                                                                                                                                                                                                                                                                                                                                                                                                                                                                                                                                                                                                                                                                                                                                                                                                                                                                                                                                                                                                                                                                                                                                                                                                                                                                                                                                                                                                                                                                                                                                                                                                                               | 2.27714  | -0.00228 |          |          |   |          |          |          |   |          |          |          |   |          |         |          |   |          |         |          |   |          |          |          |   |          |          |          |   |          |         |          |   |          |          |         |   |          |          |         |   |          |          |         |   |          |          |         |   |          |         |         |   |          |          |         |   |          |          |         |   |          |          |          |   |          |          |         |   |          |          |          |    |          |          |          |    |          |          |         |   |          |          |          |   |          |          |          |   |          |          |          |   |          |          |          |   |          |         |          |   |          |          |          |                                                                                                                                                         |                                                                                                                                                                                                                                                                                                                                                                                                                                                                                                                                                                                                                                                                                                                                                                                                                                                                                                                                                                                                                                                                                                                                                                                                                                                                                                                                                                                                                                                                                                                                                                                                                                                                                                                                                                                                                                                                                                                                   |         |          |          |          |         |          |                                                                                                                                                        |                                                                                                                                                                                                                                                                                                                                                                                                                                                                                                                                                                                                                                                                                                                                                                                                                                                                                                                                                                                                                                                                                                                                                                                                                                                                                                                                                                                                                                                                                                                                                                                                                                                                                                                                                                                                                                                                                                                                                                                                                                                                             |   |          |          |          |   |          |          |          |   |          |          |          |   |          |          |          |   |          |          |          |   |          |          |          |   |          |          |          |   |          |          |          |   |          |          |         |   |          |          |         |   |          |          |          |   |          |          |          |   |          |          |          |   |          |          |          |   |          |          |          |   |          |          |          |   |          |          |          |   |          |          |          |    |          |          |          |    |          |          |          |   |          |          |          |   |          |          |          |   |          |          |          |   |          |          |          |   |          |          |         |   |          |          |         |   |          |          |         |   |          |          |         |
| C                                                                                                                                                       | 0.65711                                                                                                                                                                                                                                                                                                                                                                                                                                                                                                                                                                                                                                                                                                                                                                                                                                                                                                                                                                                                                                                                                                                                                                                                                                                                                                                                                                                                                                                                                                                                                                                                                                                                                                                                                                                                                                                                                                                                                                                                                                                                | 3.50055  | -2.22464 |          |          |   |          |          |          |   |          |          |          |   |          |         |          |   |          |         |          |   |          |          |          |   |          |          |          |   |          |         |          |   |          |          |         |   |          |          |         |   |          |          |         |   |          |          |         |   |          |         |         |   |          |          |         |   |          |          |         |   |          |          |          |   |          |          |         |   |          |          |          |    |          |          |          |    |          |          |         |   |          |          |          |   |          |          |          |   |          |          |          |   |          |          |          |   |          |         |          |   |          |          |          |                                                                                                                                                         |                                                                                                                                                                                                                                                                                                                                                                                                                                                                                                                                                                                                                                                                                                                                                                                                                                                                                                                                                                                                                                                                                                                                                                                                                                                                                                                                                                                                                                                                                                                                                                                                                                                                                                                                                                                                                                                                                                                                   |         |          |          |          |         |          |                                                                                                                                                        |                                                                                                                                                                                                                                                                                                                                                                                                                                                                                                                                                                                                                                                                                                                                                                                                                                                                                                                                                                                                                                                                                                                                                                                                                                                                                                                                                                                                                                                                                                                                                                                                                                                                                                                                                                                                                                                                                                                                                                                                                                                                             |   |          |          |          |   |          |          |          |   |          |          |          |   |          |          |          |   |          |          |          |   |          |          |          |   |          |          |          |   |          |          |          |   |          |          |         |   |          |          |         |   |          |          |          |   |          |          |          |   |          |          |          |   |          |          |          |   |          |          |          |   |          |          |          |   |          |          |          |   |          |          |          |    |          |          |          |    |          |          |          |   |          |          |          |   |          |          |          |   |          |          |          |   |          |          |          |   |          |          |         |   |          |          |         |   |          |          |         |   |          |          |         |
| H                                                                                                                                                       | -0.04871                                                                                                                                                                                                                                                                                                                                                                                                                                                                                                                                                                                                                                                                                                                                                                                                                                                                                                                                                                                                                                                                                                                                                                                                                                                                                                                                                                                                                                                                                                                                                                                                                                                                                                                                                                                                                                                                                                                                                                                                                                                               | 3.63788  | -3.04618 |          |          |   |          |          |          |   |          |          |          |   |          |         |          |   |          |         |          |   |          |          |          |   |          |          |          |   |          |         |          |   |          |          |         |   |          |          |         |   |          |          |         |   |          |          |         |   |          |         |         |   |          |          |         |   |          |          |         |   |          |          |          |   |          |          |         |   |          |          |          |    |          |          |          |    |          |          |         |   |          |          |          |   |          |          |          |   |          |          |          |   |          |          |          |   |          |         |          |   |          |          |          |                                                                                                                                                         |                                                                                                                                                                                                                                                                                                                                                                                                                                                                                                                                                                                                                                                                                                                                                                                                                                                                                                                                                                                                                                                                                                                                                                                                                                                                                                                                                                                                                                                                                                                                                                                                                                                                                                                                                                                                                                                                                                                                   |         |          |          |          |         |          |                                                                                                                                                        |                                                                                                                                                                                                                                                                                                                                                                                                                                                                                                                                                                                                                                                                                                                                                                                                                                                                                                                                                                                                                                                                                                                                                                                                                                                                                                                                                                                                                                                                                                                                                                                                                                                                                                                                                                                                                                                                                                                                                                                                                                                                             |   |          |          |          |   |          |          |          |   |          |          |          |   |          |          |          |   |          |          |          |   |          |          |          |   |          |          |          |   |          |          |          |   |          |          |         |   |          |          |         |   |          |          |          |   |          |          |          |   |          |          |          |   |          |          |          |   |          |          |          |   |          |          |          |   |          |          |          |   |          |          |          |    |          |          |          |    |          |          |          |   |          |          |          |   |          |          |          |   |          |          |          |   |          |          |          |   |          |          |         |   |          |          |         |   |          |          |         |   |          |          |         |
| H                                                                                                                                                       | 1.61427                                                                                                                                                                                                                                                                                                                                                                                                                                                                                                                                                                                                                                                                                                                                                                                                                                                                                                                                                                                                                                                                                                                                                                                                                                                                                                                                                                                                                                                                                                                                                                                                                                                                                                                                                                                                                                                                                                                                                                                                                                                                | 3.18153  | -2.64009 |          |          |   |          |          |          |   |          |          |          |   |          |         |          |   |          |         |          |   |          |          |          |   |          |          |          |   |          |         |          |   |          |          |         |   |          |          |         |   |          |          |         |   |          |          |         |   |          |         |         |   |          |          |         |   |          |          |         |   |          |          |          |   |          |          |         |   |          |          |          |    |          |          |          |    |          |          |         |   |          |          |          |   |          |          |          |   |          |          |          |   |          |          |          |   |          |         |          |   |          |          |          |                                                                                                                                                         |                                                                                                                                                                                                                                                                                                                                                                                                                                                                                                                                                                                                                                                                                                                                                                                                                                                                                                                                                                                                                                                                                                                                                                                                                                                                                                                                                                                                                                                                                                                                                                                                                                                                                                                                                                                                                                                                                                                                   |         |          |          |          |         |          |                                                                                                                                                        |                                                                                                                                                                                                                                                                                                                                                                                                                                                                                                                                                                                                                                                                                                                                                                                                                                                                                                                                                                                                                                                                                                                                                                                                                                                                                                                                                                                                                                                                                                                                                                                                                                                                                                                                                                                                                                                                                                                                                                                                                                                                             |   |          |          |          |   |          |          |          |   |          |          |          |   |          |          |          |   |          |          |          |   |          |          |          |   |          |          |          |   |          |          |          |   |          |          |         |   |          |          |         |   |          |          |          |   |          |          |          |   |          |          |          |   |          |          |          |   |          |          |          |   |          |          |          |   |          |          |          |   |          |          |          |    |          |          |          |    |          |          |          |   |          |          |          |   |          |          |          |   |          |          |          |   |          |          |          |   |          |          |         |   |          |          |         |   |          |          |         |   |          |          |         |
| H                                                                                                                                                       | 0.79253                                                                                                                                                                                                                                                                                                                                                                                                                                                                                                                                                                                                                                                                                                                                                                                                                                                                                                                                                                                                                                                                                                                                                                                                                                                                                                                                                                                                                                                                                                                                                                                                                                                                                                                                                                                                                                                                                                                                                                                                                                                                | 4.47334  | -1.74729 |          |          |   |          |          |          |   |          |          |          |   |          |         |          |   |          |         |          |   |          |          |          |   |          |          |          |   |          |         |          |   |          |          |         |   |          |          |         |   |          |          |         |   |          |          |         |   |          |         |         |   |          |          |         |   |          |          |         |   |          |          |          |   |          |          |         |   |          |          |          |    |          |          |          |    |          |          |         |   |          |          |          |   |          |          |          |   |          |          |          |   |          |          |          |   |          |         |          |   |          |          |          |                                                                                                                                                         |                                                                                                                                                                                                                                                                                                                                                                                                                                                                                                                                                                                                                                                                                                                                                                                                                                                                                                                                                                                                                                                                                                                                                                                                                                                                                                                                                                                                                                                                                                                                                                                                                                                                                                                                                                                                                                                                                                                                   |         |          |          |          |         |          |                                                                                                                                                        |                                                                                                                                                                                                                                                                                                                                                                                                                                                                                                                                                                                                                                                                                                                                                                                                                                                                                                                                                                                                                                                                                                                                                                                                                                                                                                                                                                                                                                                                                                                                                                                                                                                                                                                                                                                                                                                                                                                                                                                                                                                                             |   |          |          |          |   |          |          |          |   |          |          |          |   |          |          |          |   |          |          |          |   |          |          |          |   |          |          |          |   |          |          |          |   |          |          |         |   |          |          |         |   |          |          |          |   |          |          |          |   |          |          |          |   |          |          |          |   |          |          |          |   |          |          |          |   |          |          |          |   |          |          |          |    |          |          |          |    |          |          |          |   |          |          |          |   |          |          |          |   |          |          |          |   |          |          |          |   |          |          |         |   |          |          |         |   |          |          |         |   |          |          |         |
| O                                                                                                                                                       | 0.02746                                                                                                                                                                                                                                                                                                                                                                                                                                                                                                                                                                                                                                                                                                                                                                                                                                                                                                                                                                                                                                                                                                                                                                                                                                                                                                                                                                                                                                                                                                                                                                                                                                                                                                                                                                                                                                                                                                                                                                                                                                                                | -0.43866 | -4.93220 |          |          |   |          |          |          |   |          |          |          |   |          |         |          |   |          |         |          |   |          |          |          |   |          |          |          |   |          |         |          |   |          |          |         |   |          |          |         |   |          |          |         |   |          |          |         |   |          |         |         |   |          |          |         |   |          |          |         |   |          |          |          |   |          |          |         |   |          |          |          |    |          |          |          |    |          |          |         |   |          |          |          |   |          |          |          |   |          |          |          |   |          |          |          |   |          |         |          |   |          |          |          |                                                                                                                                                         |                                                                                                                                                                                                                                                                                                                                                                                                                                                                                                                                                                                                                                                                                                                                                                                                                                                                                                                                                                                                                                                                                                                                                                                                                                                                                                                                                                                                                                                                                                                                                                                                                                                                                                                                                                                                                                                                                                                                   |         |          |          |          |         |          |                                                                                                                                                        |                                                                                                                                                                                                                                                                                                                                                                                                                                                                                                                                                                                                                                                                                                                                                                                                                                                                                                                                                                                                                                                                                                                                                                                                                                                                                                                                                                                                                                                                                                                                                                                                                                                                                                                                                                                                                                                                                                                                                                                                                                                                             |   |          |          |          |   |          |          |          |   |          |          |          |   |          |          |          |   |          |          |          |   |          |          |          |   |          |          |          |   |          |          |          |   |          |          |         |   |          |          |         |   |          |          |          |   |          |          |          |   |          |          |          |   |          |          |          |   |          |          |          |   |          |          |          |   |          |          |          |   |          |          |          |    |          |          |          |    |          |          |          |   |          |          |          |   |          |          |          |   |          |          |          |   |          |          |          |   |          |          |         |   |          |          |         |   |          |          |         |   |          |          |         |
| O                                                                                                                                                       | 0.05564                                                                                                                                                                                                                                                                                                                                                                                                                                                                                                                                                                                                                                                                                                                                                                                                                                                                                                                                                                                                                                                                                                                                                                                                                                                                                                                                                                                                                                                                                                                                                                                                                                                                                                                                                                                                                                                                                                                                                                                                                                                                | 0.00926  | 5.47811  |          |          |   |          |          |          |   |          |          |          |   |          |         |          |   |          |         |          |   |          |          |          |   |          |          |          |   |          |         |          |   |          |          |         |   |          |          |         |   |          |          |         |   |          |          |         |   |          |         |         |   |          |          |         |   |          |          |         |   |          |          |          |   |          |          |         |   |          |          |          |    |          |          |          |    |          |          |         |   |          |          |          |   |          |          |          |   |          |          |          |   |          |          |          |   |          |         |          |   |          |          |          |                                                                                                                                                         |                                                                                                                                                                                                                                                                                                                                                                                                                                                                                                                                                                                                                                                                                                                                                                                                                                                                                                                                                                                                                                                                                                                                                                                                                                                                                                                                                                                                                                                                                                                                                                                                                                                                                                                                                                                                                                                                                                                                   |         |          |          |          |         |          |                                                                                                                                                        |                                                                                                                                                                                                                                                                                                                                                                                                                                                                                                                                                                                                                                                                                                                                                                                                                                                                                                                                                                                                                                                                                                                                                                                                                                                                                                                                                                                                                                                                                                                                                                                                                                                                                                                                                                                                                                                                                                                                                                                                                                                                             |   |          |          |          |   |          |          |          |   |          |          |          |   |          |          |          |   |          |          |          |   |          |          |          |   |          |          |          |   |          |          |          |   |          |          |         |   |          |          |         |   |          |          |          |   |          |          |          |   |          |          |          |   |          |          |          |   |          |          |          |   |          |          |          |   |          |          |          |   |          |          |          |    |          |          |          |    |          |          |          |   |          |          |          |   |          |          |          |   |          |          |          |   |          |          |          |   |          |          |         |   |          |          |         |   |          |          |         |   |          |          |         |
| C                                                                                                                                                       | -0.01289                                                                                                                                                                                                                                                                                                                                                                                                                                                                                                                                                                                                                                                                                                                                                                                                                                                                                                                                                                                                                                                                                                                                                                                                                                                                                                                                                                                                                                                                                                                                                                                                                                                                                                                                                                                                                                                                                                                                                                                                                                                               | -1.70872 | -5.56113 |          |          |   |          |          |          |   |          |          |          |   |          |         |          |   |          |         |          |   |          |          |          |   |          |          |          |   |          |         |          |   |          |          |         |   |          |          |         |   |          |          |         |   |          |          |         |   |          |         |         |   |          |          |         |   |          |          |         |   |          |          |          |   |          |          |         |   |          |          |          |    |          |          |          |    |          |          |         |   |          |          |          |   |          |          |          |   |          |          |          |   |          |          |          |   |          |         |          |   |          |          |          |                                                                                                                                                         |                                                                                                                                                                                                                                                                                                                                                                                                                                                                                                                                                                                                                                                                                                                                                                                                                                                                                                                                                                                                                                                                                                                                                                                                                                                                                                                                                                                                                                                                                                                                                                                                                                                                                                                                                                                                                                                                                                                                   |         |          |          |          |         |          |                                                                                                                                                        |                                                                                                                                                                                                                                                                                                                                                                                                                                                                                                                                                                                                                                                                                                                                                                                                                                                                                                                                                                                                                                                                                                                                                                                                                                                                                                                                                                                                                                                                                                                                                                                                                                                                                                                                                                                                                                                                                                                                                                                                                                                                             |   |          |          |          |   |          |          |          |   |          |          |          |   |          |          |          |   |          |          |          |   |          |          |          |   |          |          |          |   |          |          |          |   |          |          |         |   |          |          |         |   |          |          |          |   |          |          |          |   |          |          |          |   |          |          |          |   |          |          |          |   |          |          |          |   |          |          |          |   |          |          |          |    |          |          |          |    |          |          |          |   |          |          |          |   |          |          |          |   |          |          |          |   |          |          |          |   |          |          |         |   |          |          |         |   |          |          |         |   |          |          |         |
| H                                                                                                                                                       | -0.91087                                                                                                                                                                                                                                                                                                                                                                                                                                                                                                                                                                                                                                                                                                                                                                                                                                                                                                                                                                                                                                                                                                                                                                                                                                                                                                                                                                                                                                                                                                                                                                                                                                                                                                                                                                                                                                                                                                                                                                                                                                                               | -2.26393 | -5.27061 |          |          |   |          |          |          |   |          |          |          |   |          |         |          |   |          |         |          |   |          |          |          |   |          |          |          |   |          |         |          |   |          |          |         |   |          |          |         |   |          |          |         |   |          |          |         |   |          |         |         |   |          |          |         |   |          |          |         |   |          |          |          |   |          |          |         |   |          |          |          |    |          |          |          |    |          |          |         |   |          |          |          |   |          |          |          |   |          |          |          |   |          |          |          |   |          |         |          |   |          |          |          |                                                                                                                                                         |                                                                                                                                                                                                                                                                                                                                                                                                                                                                                                                                                                                                                                                                                                                                                                                                                                                                                                                                                                                                                                                                                                                                                                                                                                                                                                                                                                                                                                                                                                                                                                                                                                                                                                                                                                                                                                                                                                                                   |         |          |          |          |         |          |                                                                                                                                                        |                                                                                                                                                                                                                                                                                                                                                                                                                                                                                                                                                                                                                                                                                                                                                                                                                                                                                                                                                                                                                                                                                                                                                                                                                                                                                                                                                                                                                                                                                                                                                                                                                                                                                                                                                                                                                                                                                                                                                                                                                                                                             |   |          |          |          |   |          |          |          |   |          |          |          |   |          |          |          |   |          |          |          |   |          |          |          |   |          |          |          |   |          |          |          |   |          |          |         |   |          |          |         |   |          |          |          |   |          |          |          |   |          |          |          |   |          |          |          |   |          |          |          |   |          |          |          |   |          |          |          |   |          |          |          |    |          |          |          |    |          |          |          |   |          |          |          |   |          |          |          |   |          |          |          |   |          |          |          |   |          |          |         |   |          |          |         |   |          |          |         |   |          |          |         |
| H                                                                                                                                                       | -0.02945                                                                                                                                                                                                                                                                                                                                                                                                                                                                                                                                                                                                                                                                                                                                                                                                                                                                                                                                                                                                                                                                                                                                                                                                                                                                                                                                                                                                                                                                                                                                                                                                                                                                                                                                                                                                                                                                                                                                                                                                                                                               | -1.51848 | -6.63237 |          |          |   |          |          |          |   |          |          |          |   |          |         |          |   |          |         |          |   |          |          |          |   |          |          |          |   |          |         |          |   |          |          |         |   |          |          |         |   |          |          |         |   |          |          |         |   |          |         |         |   |          |          |         |   |          |          |         |   |          |          |          |   |          |          |         |   |          |          |          |    |          |          |          |    |          |          |         |   |          |          |          |   |          |          |          |   |          |          |          |   |          |          |          |   |          |         |          |   |          |          |          |                                                                                                                                                         |                                                                                                                                                                                                                                                                                                                                                                                                                                                                                                                                                                                                                                                                                                                                                                                                                                                                                                                                                                                                                                                                                                                                                                                                                                                                                                                                                                                                                                                                                                                                                                                                                                                                                                                                                                                                                                                                                                                                   |         |          |          |          |         |          |                                                                                                                                                        |                                                                                                                                                                                                                                                                                                                                                                                                                                                                                                                                                                                                                                                                                                                                                                                                                                                                                                                                                                                                                                                                                                                                                                                                                                                                                                                                                                                                                                                                                                                                                                                                                                                                                                                                                                                                                                                                                                                                                                                                                                                                             |   |          |          |          |   |          |          |          |   |          |          |          |   |          |          |          |   |          |          |          |   |          |          |          |   |          |          |          |   |          |          |          |   |          |          |         |   |          |          |         |   |          |          |          |   |          |          |          |   |          |          |          |   |          |          |          |   |          |          |          |   |          |          |          |   |          |          |          |   |          |          |          |    |          |          |          |    |          |          |          |   |          |          |          |   |          |          |          |   |          |          |          |   |          |          |          |   |          |          |         |   |          |          |         |   |          |          |         |   |          |          |         |
| H                                                                                                                                                       | 0.87029                                                                                                                                                                                                                                                                                                                                                                                                                                                                                                                                                                                                                                                                                                                                                                                                                                                                                                                                                                                                                                                                                                                                                                                                                                                                                                                                                                                                                                                                                                                                                                                                                                                                                                                                                                                                                                                                                                                                                                                                                                                                | -2.30336 | -5.30533 |          |          |   |          |          |          |   |          |          |          |   |          |         |          |   |          |         |          |   |          |          |          |   |          |          |          |   |          |         |          |   |          |          |         |   |          |          |         |   |          |          |         |   |          |          |         |   |          |         |         |   |          |          |         |   |          |          |         |   |          |          |          |   |          |          |         |   |          |          |          |    |          |          |          |    |          |          |         |   |          |          |          |   |          |          |          |   |          |          |          |   |          |          |          |   |          |         |          |   |          |          |          |                                                                                                                                                         |                                                                                                                                                                                                                                                                                                                                                                                                                                                                                                                                                                                                                                                                                                                                                                                                                                                                                                                                                                                                                                                                                                                                                                                                                                                                                                                                                                                                                                                                                                                                                                                                                                                                                                                                                                                                                                                                                                                                   |         |          |          |          |         |          |                                                                                                                                                        |                                                                                                                                                                                                                                                                                                                                                                                                                                                                                                                                                                                                                                                                                                                                                                                                                                                                                                                                                                                                                                                                                                                                                                                                                                                                                                                                                                                                                                                                                                                                                                                                                                                                                                                                                                                                                                                                                                                                                                                                                                                                             |   |          |          |          |   |          |          |          |   |          |          |          |   |          |          |          |   |          |          |          |   |          |          |          |   |          |          |          |   |          |          |          |   |          |          |         |   |          |          |         |   |          |          |          |   |          |          |          |   |          |          |          |   |          |          |          |   |          |          |          |   |          |          |          |   |          |          |          |   |          |          |          |    |          |          |          |    |          |          |          |   |          |          |          |   |          |          |          |   |          |          |          |   |          |          |          |   |          |          |         |   |          |          |         |   |          |          |         |   |          |          |         |
| C                                                                                                                                                       | 0.11097                                                                                                                                                                                                                                                                                                                                                                                                                                                                                                                                                                                                                                                                                                                                                                                                                                                                                                                                                                                                                                                                                                                                                                                                                                                                                                                                                                                                                                                                                                                                                                                                                                                                                                                                                                                                                                                                                                                                                                                                                                                                | 1.24570  | 5.74199  |          |          |   |          |          |          |   |          |          |          |   |          |         |          |   |          |         |          |   |          |          |          |   |          |          |          |   |          |         |          |   |          |          |         |   |          |          |         |   |          |          |         |   |          |          |         |   |          |         |         |   |          |          |         |   |          |          |         |   |          |          |          |   |          |          |         |   |          |          |          |    |          |          |          |    |          |          |         |   |          |          |          |   |          |          |          |   |          |          |          |   |          |          |          |   |          |         |          |   |          |          |          |                                                                                                                                                         |                                                                                                                                                                                                                                                                                                                                                                                                                                                                                                                                                                                                                                                                                                                                                                                                                                                                                                                                                                                                                                                                                                                                                                                                                                                                                                                                                                                                                                                                                                                                                                                                                                                                                                                                                                                                                                                                                                                                   |         |          |          |          |         |          |                                                                                                                                                        |                                                                                                                                                                                                                                                                                                                                                                                                                                                                                                                                                                                                                                                                                                                                                                                                                                                                                                                                                                                                                                                                                                                                                                                                                                                                                                                                                                                                                                                                                                                                                                                                                                                                                                                                                                                                                                                                                                                                                                                                                                                                             |   |          |          |          |   |          |          |          |   |          |          |          |   |          |          |          |   |          |          |          |   |          |          |          |   |          |          |          |   |          |          |          |   |          |          |         |   |          |          |         |   |          |          |          |   |          |          |          |   |          |          |          |   |          |          |          |   |          |          |          |   |          |          |          |   |          |          |          |   |          |          |          |    |          |          |          |    |          |          |          |   |          |          |          |   |          |          |          |   |          |          |          |   |          |          |          |   |          |          |         |   |          |          |         |   |          |          |         |   |          |          |         |
| H                                                                                                                                                       | -0.75358                                                                                                                                                                                                                                                                                                                                                                                                                                                                                                                                                                                                                                                                                                                                                                                                                                                                                                                                                                                                                                                                                                                                                                                                                                                                                                                                                                                                                                                                                                                                                                                                                                                                                                                                                                                                                                                                                                                                                                                                                                                               | 1.87167  | 5.49895  |          |          |   |          |          |          |   |          |          |          |   |          |         |          |   |          |         |          |   |          |          |          |   |          |          |          |   |          |         |          |   |          |          |         |   |          |          |         |   |          |          |         |   |          |          |         |   |          |         |         |   |          |          |         |   |          |          |         |   |          |          |          |   |          |          |         |   |          |          |          |    |          |          |          |    |          |          |         |   |          |          |          |   |          |          |          |   |          |          |          |   |          |          |          |   |          |         |          |   |          |          |          |                                                                                                                                                         |                                                                                                                                                                                                                                                                                                                                                                                                                                                                                                                                                                                                                                                                                                                                                                                                                                                                                                                                                                                                                                                                                                                                                                                                                                                                                                                                                                                                                                                                                                                                                                                                                                                                                                                                                                                                                                                                                                                                   |         |          |          |          |         |          |                                                                                                                                                        |                                                                                                                                                                                                                                                                                                                                                                                                                                                                                                                                                                                                                                                                                                                                                                                                                                                                                                                                                                                                                                                                                                                                                                                                                                                                                                                                                                                                                                                                                                                                                                                                                                                                                                                                                                                                                                                                                                                                                                                                                                                                             |   |          |          |          |   |          |          |          |   |          |          |          |   |          |          |          |   |          |          |          |   |          |          |          |   |          |          |          |   |          |          |          |   |          |          |         |   |          |          |         |   |          |          |          |   |          |          |          |   |          |          |          |   |          |          |          |   |          |          |          |   |          |          |          |   |          |          |          |   |          |          |          |    |          |          |          |    |          |          |          |   |          |          |          |   |          |          |          |   |          |          |          |   |          |          |          |   |          |          |         |   |          |          |         |   |          |          |         |   |          |          |         |
| H                                                                                                                                                       | 0.10073                                                                                                                                                                                                                                                                                                                                                                                                                                                                                                                                                                                                                                                                                                                                                                                                                                                                                                                                                                                                                                                                                                                                                                                                                                                                                                                                                                                                                                                                                                                                                                                                                                                                                                                                                                                                                                                                                                                                                                                                                                                                | 1.00017  | 6.80183  |          |          |   |          |          |          |   |          |          |          |   |          |         |          |   |          |         |          |   |          |          |          |   |          |          |          |   |          |         |          |   |          |          |         |   |          |          |         |   |          |          |         |   |          |          |         |   |          |         |         |   |          |          |         |   |          |          |         |   |          |          |          |   |          |          |         |   |          |          |          |    |          |          |          |    |          |          |         |   |          |          |          |   |          |          |          |   |          |          |          |   |          |          |          |   |          |         |          |   |          |          |          |                                                                                                                                                         |                                                                                                                                                                                                                                                                                                                                                                                                                                                                                                                                                                                                                                                                                                                                                                                                                                                                                                                                                                                                                                                                                                                                                                                                                                                                                                                                                                                                                                                                                                                                                                                                                                                                                                                                                                                                                                                                                                                                   |         |          |          |          |         |          |                                                                                                                                                        |                                                                                                                                                                                                                                                                                                                                                                                                                                                                                                                                                                                                                                                                                                                                                                                                                                                                                                                                                                                                                                                                                                                                                                                                                                                                                                                                                                                                                                                                                                                                                                                                                                                                                                                                                                                                                                                                                                                                                                                                                                                                             |   |          |          |          |   |          |          |          |   |          |          |          |   |          |          |          |   |          |          |          |   |          |          |          |   |          |          |          |   |          |          |          |   |          |          |         |   |          |          |         |   |          |          |          |   |          |          |          |   |          |          |          |   |          |          |          |   |          |          |          |   |          |          |          |   |          |          |          |   |          |          |          |    |          |          |          |    |          |          |          |   |          |          |          |   |          |          |          |   |          |          |          |   |          |          |          |   |          |          |         |   |          |          |         |   |          |          |         |   |          |          |         |
| H                                                                                                                                                       | 1.02715                                                                                                                                                                                                                                                                                                                                                                                                                                                                                                                                                                                                                                                                                                                                                                                                                                                                                                                                                                                                                                                                                                                                                                                                                                                                                                                                                                                                                                                                                                                                                                                                                                                                                                                                                                                                                                                                                                                                                                                                                                                                | 1.79266  | 5.49765  |          |          |   |          |          |          |   |          |          |          |   |          |         |          |   |          |         |          |   |          |          |          |   |          |          |          |   |          |         |          |   |          |          |         |   |          |          |         |   |          |          |         |   |          |          |         |   |          |         |         |   |          |          |         |   |          |          |         |   |          |          |          |   |          |          |         |   |          |          |          |    |          |          |          |    |          |          |         |   |          |          |          |   |          |          |          |   |          |          |          |   |          |          |          |   |          |         |          |   |          |          |          |                                                                                                                                                         |                                                                                                                                                                                                                                                                                                                                                                                                                                                                                                                                                                                                                                                                                                                                                                                                                                                                                                                                                                                                                                                                                                                                                                                                                                                                                                                                                                                                                                                                                                                                                                                                                                                                                                                                                                                                                                                                                                                                   |         |          |          |          |         |          |                                                                                                                                                        |                                                                                                                                                                                                                                                                                                                                                                                                                                                                                                                                                                                                                                                                                                                                                                                                                                                                                                                                                                                                                                                                                                                                                                                                                                                                                                                                                                                                                                                                                                                                                                                                                                                                                                                                                                                                                                                                                                                                                                                                                                                                             |   |          |          |          |   |          |          |          |   |          |          |          |   |          |          |          |   |          |          |          |   |          |          |          |   |          |          |          |   |          |          |          |   |          |          |         |   |          |          |         |   |          |          |          |   |          |          |          |   |          |          |          |   |          |          |          |   |          |          |          |   |          |          |          |   |          |          |          |   |          |          |          |    |          |          |          |    |          |          |          |   |          |          |          |   |          |          |          |   |          |          |          |   |          |          |          |   |          |          |         |   |          |          |         |   |          |          |         |   |          |          |         |
|  <p><b>3c</b><br/>-5987.242631<br/>-5989.944286<br/>-5987.861142</p>  | <table border="1"> <tbody> <tr><td>C</td><td>-0.85777</td><td>0.86927</td><td>-3.32949</td></tr> <tr><td>C</td><td>-0.39131</td><td>0.94943</td><td>-0.56587</td></tr> <tr><td>C</td><td>-0.68288</td><td>-0.31712</td><td>-2.61680</td></tr> <tr><td>C</td><td>-0.80763</td><td>2.09368</td><td>-2.66291</td></tr> <tr><td>C</td><td>-0.57890</td><td>2.12544</td><td>-1.29773</td></tr> <tr><td>C</td><td>-0.45391</td><td>-0.26793</td><td>-1.24921</td></tr> <tr><td>H</td><td>-0.72840</td><td>-1.26718</td><td>-3.12608</td></tr> <tr><td>H</td><td>-0.53210</td><td>3.07219</td><td>-0.77667</td></tr> <tr><td>C</td><td>-0.15899</td><td>1.03880</td><td>0.89767</td></tr> <tr><td>C</td><td>0.19270</td><td>1.24070</td><td>3.67193</td></tr> <tr><td>C</td><td>1.11151</td><td>0.93581</td><td>1.47035</td></tr> <tr><td>C</td><td>-1.24804</td><td>1.25632</td><td>1.74649</td></tr> <tr><td>C</td><td>-1.08225</td><td>1.35490</td><td>3.11751</td></tr> <tr><td>C</td><td>1.29482</td><td>1.03329</td><td>2.84224</td></tr> <tr><td>H</td><td>-2.23508</td><td>1.33720</td><td>1.31140</td></tr> <tr><td>H</td><td>-1.92603</td><td>1.51721</td><td>3.77281</td></tr> <tr><td>H</td><td>2.28399</td><td>0.95200</td><td>3.26529</td></tr> <tr><td>H</td><td>-0.94689</td><td>3.00412</td><td>-3.22809</td></tr> <tr><td>Br</td><td>-0.24390</td><td>-1.91831</td><td>-0.31101</td></tr> <tr><td>Br</td><td>2.65200</td><td>0.67430</td><td>0.37181</td></tr> <tr><td>C</td><td>-1.10371</td><td>0.87709</td><td>-4.79700</td></tr> <tr><td>O</td><td>-1.26431</td><td>1.87319</td><td>-5.45781</td></tr> <tr><td>O</td><td>-1.13170</td><td>-0.36477</td><td>-5.33630</td></tr> <tr><td>H</td><td>-1.29480</td><td>-0.25900</td><td>-6.28362</td></tr> <tr><td>C</td><td>0.32895</td><td>1.35019</td><td>5.14959</td></tr> <tr><td>O</td><td>-0.59018</td><td>1.53231</td><td>5.90899</td></tr> <tr><td>O</td><td>1.60842</td><td>1.22390</td><td>5.57470</td></tr> <tr><td>H</td><td>1.59689</td><td>1.30720</td><td>6.53810</td></tr> </tbody> </table> | C        | -0.85777 | 0.86927  | -3.32949 | C | -0.39131 | 0.94943  | -0.56587 | C | -0.68288 | -0.31712 | -2.61680 | C | -0.80763 | 2.09368 | -2.66291 | C | -0.57890 | 2.12544 | -1.29773 | C | -0.45391 | -0.26793 | -1.24921 | H | -0.72840 | -1.26718 | -3.12608 | H | -0.53210 | 3.07219 | -0.77667 | C | -0.15899 | 1.03880  | 0.89767 | C | 0.19270  | 1.24070  | 3.67193 | C | 1.11151  | 0.93581  | 1.47035 | C | -1.24804 | 1.25632  | 1.74649 | C | -1.08225 | 1.35490 | 3.11751 | C | 1.29482  | 1.03329  | 2.84224 | H | -2.23508 | 1.33720  | 1.31140 | H | -1.92603 | 1.51721  | 3.77281  | H | 2.28399  | 0.95200  | 3.26529 | H | -0.94689 | 3.00412  | -3.22809 | Br | -0.24390 | -1.91831 | -0.31101 | Br | 2.65200  | 0.67430  | 0.37181 | C | -1.10371 | 0.87709  | -4.79700 | O | -1.26431 | 1.87319  | -5.45781 | O | -1.13170 | -0.36477 | -5.33630 | H | -1.29480 | -0.25900 | -6.28362 | C | 0.32895  | 1.35019 | 5.14959  | O | -0.59018 | 1.53231  | 5.90899  | O                                                                                                                                                       | 1.60842                                                                                                                                                                                                                                                                                                                                                                                                                                                                                                                                                                                                                                                                                                                                                                                                                                                                                                                                                                                                                                                                                                                                                                                                                                                                                                                                                                                                                                                                                                                                                                                                                                                                                                                                                                                                                                                                                                                           | 1.22390 | 5.57470  | H        | 1.59689  | 1.30720 | 6.53810  |  <p><b>3c</b><br/>-5987.211088<br/>-5989.91348<br/>-5987.832882</p> | <table border="1"> <tbody> <tr><td>C</td><td>-0.00108</td><td>0.75667</td><td>-3.55492</td></tr> <tr><td>C</td><td>-0.00134</td><td>0.10049</td><td>-0.74719</td></tr> <tr><td>C</td><td>-0.00274</td><td>-0.56213</td><td>-3.12149</td></tr> <tr><td>C</td><td>0.00070</td><td>1.75671</td><td>-2.59373</td></tr> <tr><td>C</td><td>0.00055</td><td>1.41456</td><td>-1.25611</td></tr> <tr><td>C</td><td>-0.00280</td><td>-0.89849</td><td>-1.77240</td></tr> <tr><td>H</td><td>-0.00395</td><td>-1.33832</td><td>-3.87185</td></tr> <tr><td>H</td><td>0.00200</td><td>2.22763</td><td>-0.56266</td></tr> <tr><td>C</td><td>-0.00148</td><td>-0.10044</td><td>0.74716</td></tr> <tr><td>C</td><td>-0.00114</td><td>-0.75661</td><td>3.55488</td></tr> <tr><td>C</td><td>0.00002</td><td>0.89855</td><td>1.77236</td></tr> <tr><td>C</td><td>-0.00322</td><td>-1.41451</td><td>1.25608</td></tr> <tr><td>C</td><td>-0.00311</td><td>-1.75665</td><td>2.59370</td></tr> <tr><td>C</td><td>0.00030</td><td>0.56220</td><td>3.12145</td></tr> <tr><td>H</td><td>-0.00477</td><td>-2.22758</td><td>0.56264</td></tr> <tr><td>H</td><td>-0.00453</td><td>-2.79801</td><td>2.87924</td></tr> <tr><td>H</td><td>0.00161</td><td>1.33838</td><td>3.87181</td></tr> <tr><td>H</td><td>0.00220</td><td>2.79807</td><td>-2.87926</td></tr> <tr><td>Br</td><td>-0.00475</td><td>-2.83290</td><td>-1.60973</td></tr> <tr><td>Br</td><td>0.00146</td><td>2.83295</td><td>1.60969</td></tr> <tr><td>C</td><td>-0.00120</td><td>1.01896</td><td>-5.01766</td></tr> <tr><td>O</td><td>-0.00271</td><td>0.16561</td><td>-5.86983</td></tr> <tr><td>O</td><td>0.00062</td><td>2.34130</td><td>-5.30938</td></tr> <tr><td>H</td><td>0.00043</td><td>2.41951</td><td>-6.27342</td></tr> <tr><td>C</td><td>-0.00062</td><td>-1.01889</td><td>5.01763</td></tr> <tr><td>O</td><td>0.00087</td><td>-0.16553</td><td>5.86980</td></tr> <tr><td>O</td><td>-0.00202</td><td>-2.34123</td><td>5.30936</td></tr> <tr><td>H</td><td>-0.00159</td><td>-2.41943</td><td>6.27340</td></tr> </tbody> </table> | C | -0.00108 | 0.75667  | -3.55492 | C | -0.00134 | 0.10049  | -0.74719 | C | -0.00274 | -0.56213 | -3.12149 | C | 0.00070  | 1.75671  | -2.59373 | C | 0.00055  | 1.41456  | -1.25611 | C | -0.00280 | -0.89849 | -1.77240 | H | -0.00395 | -1.33832 | -3.87185 | H | 0.00200  | 2.22763  | -0.56266 | C | -0.00148 | -0.10044 | 0.74716 | C | -0.00114 | -0.75661 | 3.55488 | C | 0.00002  | 0.89855  | 1.77236  | C | -0.00322 | -1.41451 | 1.25608  | C | -0.00311 | -1.75665 | 2.59370  | C | 0.00030  | 0.56220  | 3.12145  | H | -0.00477 | -2.22758 | 0.56264  | H | -0.00453 | -2.79801 | 2.87924  | H | 0.00161  | 1.33838  | 3.87181  | H | 0.00220  | 2.79807  | -2.87926 | Br | -0.00475 | -2.83290 | -1.60973 | Br | 0.00146  | 2.83295  | 1.60969  | C | -0.00120 | 1.01896  | -5.01766 | O | -0.00271 | 0.16561  | -5.86983 | O | 0.00062  | 2.34130  | -5.30938 | H | 0.00043  | 2.41951  | -6.27342 | C | -0.00062 | -1.01889 | 5.01763 | O | 0.00087  | -0.16553 | 5.86980 | O | -0.00202 | -2.34123 | 5.30936 | H | -0.00159 | -2.41943 | 6.27340 |
| C                                                                                                                                                       | -0.85777                                                                                                                                                                                                                                                                                                                                                                                                                                                                                                                                                                                                                                                                                                                                                                                                                                                                                                                                                                                                                                                                                                                                                                                                                                                                                                                                                                                                                                                                                                                                                                                                                                                                                                                                                                                                                                                                                                                                                                                                                                                               | 0.86927  | -3.32949 |          |          |   |          |          |          |   |          |          |          |   |          |         |          |   |          |         |          |   |          |          |          |   |          |          |          |   |          |         |          |   |          |          |         |   |          |          |         |   |          |          |         |   |          |          |         |   |          |         |         |   |          |          |         |   |          |          |         |   |          |          |          |   |          |          |         |   |          |          |          |    |          |          |          |    |          |          |         |   |          |          |          |   |          |          |          |   |          |          |          |   |          |          |          |   |          |         |          |   |          |          |          |                                                                                                                                                         |                                                                                                                                                                                                                                                                                                                                                                                                                                                                                                                                                                                                                                                                                                                                                                                                                                                                                                                                                                                                                                                                                                                                                                                                                                                                                                                                                                                                                                                                                                                                                                                                                                                                                                                                                                                                                                                                                                                                   |         |          |          |          |         |          |                                                                                                                                                        |                                                                                                                                                                                                                                                                                                                                                                                                                                                                                                                                                                                                                                                                                                                                                                                                                                                                                                                                                                                                                                                                                                                                                                                                                                                                                                                                                                                                                                                                                                                                                                                                                                                                                                                                                                                                                                                                                                                                                                                                                                                                             |   |          |          |          |   |          |          |          |   |          |          |          |   |          |          |          |   |          |          |          |   |          |          |          |   |          |          |          |   |          |          |          |   |          |          |         |   |          |          |         |   |          |          |          |   |          |          |          |   |          |          |          |   |          |          |          |   |          |          |          |   |          |          |          |   |          |          |          |   |          |          |          |    |          |          |          |    |          |          |          |   |          |          |          |   |          |          |          |   |          |          |          |   |          |          |          |   |          |          |         |   |          |          |         |   |          |          |         |   |          |          |         |
| C                                                                                                                                                       | -0.39131                                                                                                                                                                                                                                                                                                                                                                                                                                                                                                                                                                                                                                                                                                                                                                                                                                                                                                                                                                                                                                                                                                                                                                                                                                                                                                                                                                                                                                                                                                                                                                                                                                                                                                                                                                                                                                                                                                                                                                                                                                                               | 0.94943  | -0.56587 |          |          |   |          |          |          |   |          |          |          |   |          |         |          |   |          |         |          |   |          |          |          |   |          |          |          |   |          |         |          |   |          |          |         |   |          |          |         |   |          |          |         |   |          |          |         |   |          |         |         |   |          |          |         |   |          |          |         |   |          |          |          |   |          |          |         |   |          |          |          |    |          |          |          |    |          |          |         |   |          |          |          |   |          |          |          |   |          |          |          |   |          |          |          |   |          |         |          |   |          |          |          |                                                                                                                                                         |                                                                                                                                                                                                                                                                                                                                                                                                                                                                                                                                                                                                                                                                                                                                                                                                                                                                                                                                                                                                                                                                                                                                                                                                                                                                                                                                                                                                                                                                                                                                                                                                                                                                                                                                                                                                                                                                                                                                   |         |          |          |          |         |          |                                                                                                                                                        |                                                                                                                                                                                                                                                                                                                                                                                                                                                                                                                                                                                                                                                                                                                                                                                                                                                                                                                                                                                                                                                                                                                                                                                                                                                                                                                                                                                                                                                                                                                                                                                                                                                                                                                                                                                                                                                                                                                                                                                                                                                                             |   |          |          |          |   |          |          |          |   |          |          |          |   |          |          |          |   |          |          |          |   |          |          |          |   |          |          |          |   |          |          |          |   |          |          |         |   |          |          |         |   |          |          |          |   |          |          |          |   |          |          |          |   |          |          |          |   |          |          |          |   |          |          |          |   |          |          |          |   |          |          |          |    |          |          |          |    |          |          |          |   |          |          |          |   |          |          |          |   |          |          |          |   |          |          |          |   |          |          |         |   |          |          |         |   |          |          |         |   |          |          |         |
| C                                                                                                                                                       | -0.68288                                                                                                                                                                                                                                                                                                                                                                                                                                                                                                                                                                                                                                                                                                                                                                                                                                                                                                                                                                                                                                                                                                                                                                                                                                                                                                                                                                                                                                                                                                                                                                                                                                                                                                                                                                                                                                                                                                                                                                                                                                                               | -0.31712 | -2.61680 |          |          |   |          |          |          |   |          |          |          |   |          |         |          |   |          |         |          |   |          |          |          |   |          |          |          |   |          |         |          |   |          |          |         |   |          |          |         |   |          |          |         |   |          |          |         |   |          |         |         |   |          |          |         |   |          |          |         |   |          |          |          |   |          |          |         |   |          |          |          |    |          |          |          |    |          |          |         |   |          |          |          |   |          |          |          |   |          |          |          |   |          |          |          |   |          |         |          |   |          |          |          |                                                                                                                                                         |                                                                                                                                                                                                                                                                                                                                                                                                                                                                                                                                                                                                                                                                                                                                                                                                                                                                                                                                                                                                                                                                                                                                                                                                                                                                                                                                                                                                                                                                                                                                                                                                                                                                                                                                                                                                                                                                                                                                   |         |          |          |          |         |          |                                                                                                                                                        |                                                                                                                                                                                                                                                                                                                                                                                                                                                                                                                                                                                                                                                                                                                                                                                                                                                                                                                                                                                                                                                                                                                                                                                                                                                                                                                                                                                                                                                                                                                                                                                                                                                                                                                                                                                                                                                                                                                                                                                                                                                                             |   |          |          |          |   |          |          |          |   |          |          |          |   |          |          |          |   |          |          |          |   |          |          |          |   |          |          |          |   |          |          |          |   |          |          |         |   |          |          |         |   |          |          |          |   |          |          |          |   |          |          |          |   |          |          |          |   |          |          |          |   |          |          |          |   |          |          |          |   |          |          |          |    |          |          |          |    |          |          |          |   |          |          |          |   |          |          |          |   |          |          |          |   |          |          |          |   |          |          |         |   |          |          |         |   |          |          |         |   |          |          |         |
| C                                                                                                                                                       | -0.80763                                                                                                                                                                                                                                                                                                                                                                                                                                                                                                                                                                                                                                                                                                                                                                                                                                                                                                                                                                                                                                                                                                                                                                                                                                                                                                                                                                                                                                                                                                                                                                                                                                                                                                                                                                                                                                                                                                                                                                                                                                                               | 2.09368  | -2.66291 |          |          |   |          |          |          |   |          |          |          |   |          |         |          |   |          |         |          |   |          |          |          |   |          |          |          |   |          |         |          |   |          |          |         |   |          |          |         |   |          |          |         |   |          |          |         |   |          |         |         |   |          |          |         |   |          |          |         |   |          |          |          |   |          |          |         |   |          |          |          |    |          |          |          |    |          |          |         |   |          |          |          |   |          |          |          |   |          |          |          |   |          |          |          |   |          |         |          |   |          |          |          |                                                                                                                                                         |                                                                                                                                                                                                                                                                                                                                                                                                                                                                                                                                                                                                                                                                                                                                                                                                                                                                                                                                                                                                                                                                                                                                                                                                                                                                                                                                                                                                                                                                                                                                                                                                                                                                                                                                                                                                                                                                                                                                   |         |          |          |          |         |          |                                                                                                                                                        |                                                                                                                                                                                                                                                                                                                                                                                                                                                                                                                                                                                                                                                                                                                                                                                                                                                                                                                                                                                                                                                                                                                                                                                                                                                                                                                                                                                                                                                                                                                                                                                                                                                                                                                                                                                                                                                                                                                                                                                                                                                                             |   |          |          |          |   |          |          |          |   |          |          |          |   |          |          |          |   |          |          |          |   |          |          |          |   |          |          |          |   |          |          |          |   |          |          |         |   |          |          |         |   |          |          |          |   |          |          |          |   |          |          |          |   |          |          |          |   |          |          |          |   |          |          |          |   |          |          |          |   |          |          |          |    |          |          |          |    |          |          |          |   |          |          |          |   |          |          |          |   |          |          |          |   |          |          |          |   |          |          |         |   |          |          |         |   |          |          |         |   |          |          |         |
| C                                                                                                                                                       | -0.57890                                                                                                                                                                                                                                                                                                                                                                                                                                                                                                                                                                                                                                                                                                                                                                                                                                                                                                                                                                                                                                                                                                                                                                                                                                                                                                                                                                                                                                                                                                                                                                                                                                                                                                                                                                                                                                                                                                                                                                                                                                                               | 2.12544  | -1.29773 |          |          |   |          |          |          |   |          |          |          |   |          |         |          |   |          |         |          |   |          |          |          |   |          |          |          |   |          |         |          |   |          |          |         |   |          |          |         |   |          |          |         |   |          |          |         |   |          |         |         |   |          |          |         |   |          |          |         |   |          |          |          |   |          |          |         |   |          |          |          |    |          |          |          |    |          |          |         |   |          |          |          |   |          |          |          |   |          |          |          |   |          |          |          |   |          |         |          |   |          |          |          |                                                                                                                                                         |                                                                                                                                                                                                                                                                                                                                                                                                                                                                                                                                                                                                                                                                                                                                                                                                                                                                                                                                                                                                                                                                                                                                                                                                                                                                                                                                                                                                                                                                                                                                                                                                                                                                                                                                                                                                                                                                                                                                   |         |          |          |          |         |          |                                                                                                                                                        |                                                                                                                                                                                                                                                                                                                                                                                                                                                                                                                                                                                                                                                                                                                                                                                                                                                                                                                                                                                                                                                                                                                                                                                                                                                                                                                                                                                                                                                                                                                                                                                                                                                                                                                                                                                                                                                                                                                                                                                                                                                                             |   |          |          |          |   |          |          |          |   |          |          |          |   |          |          |          |   |          |          |          |   |          |          |          |   |          |          |          |   |          |          |          |   |          |          |         |   |          |          |         |   |          |          |          |   |          |          |          |   |          |          |          |   |          |          |          |   |          |          |          |   |          |          |          |   |          |          |          |   |          |          |          |    |          |          |          |    |          |          |          |   |          |          |          |   |          |          |          |   |          |          |          |   |          |          |          |   |          |          |         |   |          |          |         |   |          |          |         |   |          |          |         |
| C                                                                                                                                                       | -0.45391                                                                                                                                                                                                                                                                                                                                                                                                                                                                                                                                                                                                                                                                                                                                                                                                                                                                                                                                                                                                                                                                                                                                                                                                                                                                                                                                                                                                                                                                                                                                                                                                                                                                                                                                                                                                                                                                                                                                                                                                                                                               | -0.26793 | -1.24921 |          |          |   |          |          |          |   |          |          |          |   |          |         |          |   |          |         |          |   |          |          |          |   |          |          |          |   |          |         |          |   |          |          |         |   |          |          |         |   |          |          |         |   |          |          |         |   |          |         |         |   |          |          |         |   |          |          |         |   |          |          |          |   |          |          |         |   |          |          |          |    |          |          |          |    |          |          |         |   |          |          |          |   |          |          |          |   |          |          |          |   |          |          |          |   |          |         |          |   |          |          |          |                                                                                                                                                         |                                                                                                                                                                                                                                                                                                                                                                                                                                                                                                                                                                                                                                                                                                                                                                                                                                                                                                                                                                                                                                                                                                                                                                                                                                                                                                                                                                                                                                                                                                                                                                                                                                                                                                                                                                                                                                                                                                                                   |         |          |          |          |         |          |                                                                                                                                                        |                                                                                                                                                                                                                                                                                                                                                                                                                                                                                                                                                                                                                                                                                                                                                                                                                                                                                                                                                                                                                                                                                                                                                                                                                                                                                                                                                                                                                                                                                                                                                                                                                                                                                                                                                                                                                                                                                                                                                                                                                                                                             |   |          |          |          |   |          |          |          |   |          |          |          |   |          |          |          |   |          |          |          |   |          |          |          |   |          |          |          |   |          |          |          |   |          |          |         |   |          |          |         |   |          |          |          |   |          |          |          |   |          |          |          |   |          |          |          |   |          |          |          |   |          |          |          |   |          |          |          |   |          |          |          |    |          |          |          |    |          |          |          |   |          |          |          |   |          |          |          |   |          |          |          |   |          |          |          |   |          |          |         |   |          |          |         |   |          |          |         |   |          |          |         |
| H                                                                                                                                                       | -0.72840                                                                                                                                                                                                                                                                                                                                                                                                                                                                                                                                                                                                                                                                                                                                                                                                                                                                                                                                                                                                                                                                                                                                                                                                                                                                                                                                                                                                                                                                                                                                                                                                                                                                                                                                                                                                                                                                                                                                                                                                                                                               | -1.26718 | -3.12608 |          |          |   |          |          |          |   |          |          |          |   |          |         |          |   |          |         |          |   |          |          |          |   |          |          |          |   |          |         |          |   |          |          |         |   |          |          |         |   |          |          |         |   |          |          |         |   |          |         |         |   |          |          |         |   |          |          |         |   |          |          |          |   |          |          |         |   |          |          |          |    |          |          |          |    |          |          |         |   |          |          |          |   |          |          |          |   |          |          |          |   |          |          |          |   |          |         |          |   |          |          |          |                                                                                                                                                         |                                                                                                                                                                                                                                                                                                                                                                                                                                                                                                                                                                                                                                                                                                                                                                                                                                                                                                                                                                                                                                                                                                                                                                                                                                                                                                                                                                                                                                                                                                                                                                                                                                                                                                                                                                                                                                                                                                                                   |         |          |          |          |         |          |                                                                                                                                                        |                                                                                                                                                                                                                                                                                                                                                                                                                                                                                                                                                                                                                                                                                                                                                                                                                                                                                                                                                                                                                                                                                                                                                                                                                                                                                                                                                                                                                                                                                                                                                                                                                                                                                                                                                                                                                                                                                                                                                                                                                                                                             |   |          |          |          |   |          |          |          |   |          |          |          |   |          |          |          |   |          |          |          |   |          |          |          |   |          |          |          |   |          |          |          |   |          |          |         |   |          |          |         |   |          |          |          |   |          |          |          |   |          |          |          |   |          |          |          |   |          |          |          |   |          |          |          |   |          |          |          |   |          |          |          |    |          |          |          |    |          |          |          |   |          |          |          |   |          |          |          |   |          |          |          |   |          |          |          |   |          |          |         |   |          |          |         |   |          |          |         |   |          |          |         |
| H                                                                                                                                                       | -0.53210                                                                                                                                                                                                                                                                                                                                                                                                                                                                                                                                                                                                                                                                                                                                                                                                                                                                                                                                                                                                                                                                                                                                                                                                                                                                                                                                                                                                                                                                                                                                                                                                                                                                                                                                                                                                                                                                                                                                                                                                                                                               | 3.07219  | -0.77667 |          |          |   |          |          |          |   |          |          |          |   |          |         |          |   |          |         |          |   |          |          |          |   |          |          |          |   |          |         |          |   |          |          |         |   |          |          |         |   |          |          |         |   |          |          |         |   |          |         |         |   |          |          |         |   |          |          |         |   |          |          |          |   |          |          |         |   |          |          |          |    |          |          |          |    |          |          |         |   |          |          |          |   |          |          |          |   |          |          |          |   |          |          |          |   |          |         |          |   |          |          |          |                                                                                                                                                         |                                                                                                                                                                                                                                                                                                                                                                                                                                                                                                                                                                                                                                                                                                                                                                                                                                                                                                                                                                                                                                                                                                                                                                                                                                                                                                                                                                                                                                                                                                                                                                                                                                                                                                                                                                                                                                                                                                                                   |         |          |          |          |         |          |                                                                                                                                                        |                                                                                                                                                                                                                                                                                                                                                                                                                                                                                                                                                                                                                                                                                                                                                                                                                                                                                                                                                                                                                                                                                                                                                                                                                                                                                                                                                                                                                                                                                                                                                                                                                                                                                                                                                                                                                                                                                                                                                                                                                                                                             |   |          |          |          |   |          |          |          |   |          |          |          |   |          |          |          |   |          |          |          |   |          |          |          |   |          |          |          |   |          |          |          |   |          |          |         |   |          |          |         |   |          |          |          |   |          |          |          |   |          |          |          |   |          |          |          |   |          |          |          |   |          |          |          |   |          |          |          |   |          |          |          |    |          |          |          |    |          |          |          |   |          |          |          |   |          |          |          |   |          |          |          |   |          |          |          |   |          |          |         |   |          |          |         |   |          |          |         |   |          |          |         |
| C                                                                                                                                                       | -0.15899                                                                                                                                                                                                                                                                                                                                                                                                                                                                                                                                                                                                                                                                                                                                                                                                                                                                                                                                                                                                                                                                                                                                                                                                                                                                                                                                                                                                                                                                                                                                                                                                                                                                                                                                                                                                                                                                                                                                                                                                                                                               | 1.03880  | 0.89767  |          |          |   |          |          |          |   |          |          |          |   |          |         |          |   |          |         |          |   |          |          |          |   |          |          |          |   |          |         |          |   |          |          |         |   |          |          |         |   |          |          |         |   |          |          |         |   |          |         |         |   |          |          |         |   |          |          |         |   |          |          |          |   |          |          |         |   |          |          |          |    |          |          |          |    |          |          |         |   |          |          |          |   |          |          |          |   |          |          |          |   |          |          |          |   |          |         |          |   |          |          |          |                                                                                                                                                         |                                                                                                                                                                                                                                                                                                                                                                                                                                                                                                                                                                                                                                                                                                                                                                                                                                                                                                                                                                                                                                                                                                                                                                                                                                                                                                                                                                                                                                                                                                                                                                                                                                                                                                                                                                                                                                                                                                                                   |         |          |          |          |         |          |                                                                                                                                                        |                                                                                                                                                                                                                                                                                                                                                                                                                                                                                                                                                                                                                                                                                                                                                                                                                                                                                                                                                                                                                                                                                                                                                                                                                                                                                                                                                                                                                                                                                                                                                                                                                                                                                                                                                                                                                                                                                                                                                                                                                                                                             |   |          |          |          |   |          |          |          |   |          |          |          |   |          |          |          |   |          |          |          |   |          |          |          |   |          |          |          |   |          |          |          |   |          |          |         |   |          |          |         |   |          |          |          |   |          |          |          |   |          |          |          |   |          |          |          |   |          |          |          |   |          |          |          |   |          |          |          |   |          |          |          |    |          |          |          |    |          |          |          |   |          |          |          |   |          |          |          |   |          |          |          |   |          |          |          |   |          |          |         |   |          |          |         |   |          |          |         |   |          |          |         |
| C                                                                                                                                                       | 0.19270                                                                                                                                                                                                                                                                                                                                                                                                                                                                                                                                                                                                                                                                                                                                                                                                                                                                                                                                                                                                                                                                                                                                                                                                                                                                                                                                                                                                                                                                                                                                                                                                                                                                                                                                                                                                                                                                                                                                                                                                                                                                | 1.24070  | 3.67193  |          |          |   |          |          |          |   |          |          |          |   |          |         |          |   |          |         |          |   |          |          |          |   |          |          |          |   |          |         |          |   |          |          |         |   |          |          |         |   |          |          |         |   |          |          |         |   |          |         |         |   |          |          |         |   |          |          |         |   |          |          |          |   |          |          |         |   |          |          |          |    |          |          |          |    |          |          |         |   |          |          |          |   |          |          |          |   |          |          |          |   |          |          |          |   |          |         |          |   |          |          |          |                                                                                                                                                         |                                                                                                                                                                                                                                                                                                                                                                                                                                                                                                                                                                                                                                                                                                                                                                                                                                                                                                                                                                                                                                                                                                                                                                                                                                                                                                                                                                                                                                                                                                                                                                                                                                                                                                                                                                                                                                                                                                                                   |         |          |          |          |         |          |                                                                                                                                                        |                                                                                                                                                                                                                                                                                                                                                                                                                                                                                                                                                                                                                                                                                                                                                                                                                                                                                                                                                                                                                                                                                                                                                                                                                                                                                                                                                                                                                                                                                                                                                                                                                                                                                                                                                                                                                                                                                                                                                                                                                                                                             |   |          |          |          |   |          |          |          |   |          |          |          |   |          |          |          |   |          |          |          |   |          |          |          |   |          |          |          |   |          |          |          |   |          |          |         |   |          |          |         |   |          |          |          |   |          |          |          |   |          |          |          |   |          |          |          |   |          |          |          |   |          |          |          |   |          |          |          |   |          |          |          |    |          |          |          |    |          |          |          |   |          |          |          |   |          |          |          |   |          |          |          |   |          |          |          |   |          |          |         |   |          |          |         |   |          |          |         |   |          |          |         |
| C                                                                                                                                                       | 1.11151                                                                                                                                                                                                                                                                                                                                                                                                                                                                                                                                                                                                                                                                                                                                                                                                                                                                                                                                                                                                                                                                                                                                                                                                                                                                                                                                                                                                                                                                                                                                                                                                                                                                                                                                                                                                                                                                                                                                                                                                                                                                | 0.93581  | 1.47035  |          |          |   |          |          |          |   |          |          |          |   |          |         |          |   |          |         |          |   |          |          |          |   |          |          |          |   |          |         |          |   |          |          |         |   |          |          |         |   |          |          |         |   |          |          |         |   |          |         |         |   |          |          |         |   |          |          |         |   |          |          |          |   |          |          |         |   |          |          |          |    |          |          |          |    |          |          |         |   |          |          |          |   |          |          |          |   |          |          |          |   |          |          |          |   |          |         |          |   |          |          |          |                                                                                                                                                         |                                                                                                                                                                                                                                                                                                                                                                                                                                                                                                                                                                                                                                                                                                                                                                                                                                                                                                                                                                                                                                                                                                                                                                                                                                                                                                                                                                                                                                                                                                                                                                                                                                                                                                                                                                                                                                                                                                                                   |         |          |          |          |         |          |                                                                                                                                                        |                                                                                                                                                                                                                                                                                                                                                                                                                                                                                                                                                                                                                                                                                                                                                                                                                                                                                                                                                                                                                                                                                                                                                                                                                                                                                                                                                                                                                                                                                                                                                                                                                                                                                                                                                                                                                                                                                                                                                                                                                                                                             |   |          |          |          |   |          |          |          |   |          |          |          |   |          |          |          |   |          |          |          |   |          |          |          |   |          |          |          |   |          |          |          |   |          |          |         |   |          |          |         |   |          |          |          |   |          |          |          |   |          |          |          |   |          |          |          |   |          |          |          |   |          |          |          |   |          |          |          |   |          |          |          |    |          |          |          |    |          |          |          |   |          |          |          |   |          |          |          |   |          |          |          |   |          |          |          |   |          |          |         |   |          |          |         |   |          |          |         |   |          |          |         |
| C                                                                                                                                                       | -1.24804                                                                                                                                                                                                                                                                                                                                                                                                                                                                                                                                                                                                                                                                                                                                                                                                                                                                                                                                                                                                                                                                                                                                                                                                                                                                                                                                                                                                                                                                                                                                                                                                                                                                                                                                                                                                                                                                                                                                                                                                                                                               | 1.25632  | 1.74649  |          |          |   |          |          |          |   |          |          |          |   |          |         |          |   |          |         |          |   |          |          |          |   |          |          |          |   |          |         |          |   |          |          |         |   |          |          |         |   |          |          |         |   |          |          |         |   |          |         |         |   |          |          |         |   |          |          |         |   |          |          |          |   |          |          |         |   |          |          |          |    |          |          |          |    |          |          |         |   |          |          |          |   |          |          |          |   |          |          |          |   |          |          |          |   |          |         |          |   |          |          |          |                                                                                                                                                         |                                                                                                                                                                                                                                                                                                                                                                                                                                                                                                                                                                                                                                                                                                                                                                                                                                                                                                                                                                                                                                                                                                                                                                                                                                                                                                                                                                                                                                                                                                                                                                                                                                                                                                                                                                                                                                                                                                                                   |         |          |          |          |         |          |                                                                                                                                                        |                                                                                                                                                                                                                                                                                                                                                                                                                                                                                                                                                                                                                                                                                                                                                                                                                                                                                                                                                                                                                                                                                                                                                                                                                                                                                                                                                                                                                                                                                                                                                                                                                                                                                                                                                                                                                                                                                                                                                                                                                                                                             |   |          |          |          |   |          |          |          |   |          |          |          |   |          |          |          |   |          |          |          |   |          |          |          |   |          |          |          |   |          |          |          |   |          |          |         |   |          |          |         |   |          |          |          |   |          |          |          |   |          |          |          |   |          |          |          |   |          |          |          |   |          |          |          |   |          |          |          |   |          |          |          |    |          |          |          |    |          |          |          |   |          |          |          |   |          |          |          |   |          |          |          |   |          |          |          |   |          |          |         |   |          |          |         |   |          |          |         |   |          |          |         |
| C                                                                                                                                                       | -1.08225                                                                                                                                                                                                                                                                                                                                                                                                                                                                                                                                                                                                                                                                                                                                                                                                                                                                                                                                                                                                                                                                                                                                                                                                                                                                                                                                                                                                                                                                                                                                                                                                                                                                                                                                                                                                                                                                                                                                                                                                                                                               | 1.35490  | 3.11751  |          |          |   |          |          |          |   |          |          |          |   |          |         |          |   |          |         |          |   |          |          |          |   |          |          |          |   |          |         |          |   |          |          |         |   |          |          |         |   |          |          |         |   |          |          |         |   |          |         |         |   |          |          |         |   |          |          |         |   |          |          |          |   |          |          |         |   |          |          |          |    |          |          |          |    |          |          |         |   |          |          |          |   |          |          |          |   |          |          |          |   |          |          |          |   |          |         |          |   |          |          |          |                                                                                                                                                         |                                                                                                                                                                                                                                                                                                                                                                                                                                                                                                                                                                                                                                                                                                                                                                                                                                                                                                                                                                                                                                                                                                                                                                                                                                                                                                                                                                                                                                                                                                                                                                                                                                                                                                                                                                                                                                                                                                                                   |         |          |          |          |         |          |                                                                                                                                                        |                                                                                                                                                                                                                                                                                                                                                                                                                                                                                                                                                                                                                                                                                                                                                                                                                                                                                                                                                                                                                                                                                                                                                                                                                                                                                                                                                                                                                                                                                                                                                                                                                                                                                                                                                                                                                                                                                                                                                                                                                                                                             |   |          |          |          |   |          |          |          |   |          |          |          |   |          |          |          |   |          |          |          |   |          |          |          |   |          |          |          |   |          |          |          |   |          |          |         |   |          |          |         |   |          |          |          |   |          |          |          |   |          |          |          |   |          |          |          |   |          |          |          |   |          |          |          |   |          |          |          |   |          |          |          |    |          |          |          |    |          |          |          |   |          |          |          |   |          |          |          |   |          |          |          |   |          |          |          |   |          |          |         |   |          |          |         |   |          |          |         |   |          |          |         |
| C                                                                                                                                                       | 1.29482                                                                                                                                                                                                                                                                                                                                                                                                                                                                                                                                                                                                                                                                                                                                                                                                                                                                                                                                                                                                                                                                                                                                                                                                                                                                                                                                                                                                                                                                                                                                                                                                                                                                                                                                                                                                                                                                                                                                                                                                                                                                | 1.03329  | 2.84224  |          |          |   |          |          |          |   |          |          |          |   |          |         |          |   |          |         |          |   |          |          |          |   |          |          |          |   |          |         |          |   |          |          |         |   |          |          |         |   |          |          |         |   |          |          |         |   |          |         |         |   |          |          |         |   |          |          |         |   |          |          |          |   |          |          |         |   |          |          |          |    |          |          |          |    |          |          |         |   |          |          |          |   |          |          |          |   |          |          |          |   |          |          |          |   |          |         |          |   |          |          |          |                                                                                                                                                         |                                                                                                                                                                                                                                                                                                                                                                                                                                                                                                                                                                                                                                                                                                                                                                                                                                                                                                                                                                                                                                                                                                                                                                                                                                                                                                                                                                                                                                                                                                                                                                                                                                                                                                                                                                                                                                                                                                                                   |         |          |          |          |         |          |                                                                                                                                                        |                                                                                                                                                                                                                                                                                                                                                                                                                                                                                                                                                                                                                                                                                                                                                                                                                                                                                                                                                                                                                                                                                                                                                                                                                                                                                                                                                                                                                                                                                                                                                                                                                                                                                                                                                                                                                                                                                                                                                                                                                                                                             |   |          |          |          |   |          |          |          |   |          |          |          |   |          |          |          |   |          |          |          |   |          |          |          |   |          |          |          |   |          |          |          |   |          |          |         |   |          |          |         |   |          |          |          |   |          |          |          |   |          |          |          |   |          |          |          |   |          |          |          |   |          |          |          |   |          |          |          |   |          |          |          |    |          |          |          |    |          |          |          |   |          |          |          |   |          |          |          |   |          |          |          |   |          |          |          |   |          |          |         |   |          |          |         |   |          |          |         |   |          |          |         |
| H                                                                                                                                                       | -2.23508                                                                                                                                                                                                                                                                                                                                                                                                                                                                                                                                                                                                                                                                                                                                                                                                                                                                                                                                                                                                                                                                                                                                                                                                                                                                                                                                                                                                                                                                                                                                                                                                                                                                                                                                                                                                                                                                                                                                                                                                                                                               | 1.33720  | 1.31140  |          |          |   |          |          |          |   |          |          |          |   |          |         |          |   |          |         |          |   |          |          |          |   |          |          |          |   |          |         |          |   |          |          |         |   |          |          |         |   |          |          |         |   |          |          |         |   |          |         |         |   |          |          |         |   |          |          |         |   |          |          |          |   |          |          |         |   |          |          |          |    |          |          |          |    |          |          |         |   |          |          |          |   |          |          |          |   |          |          |          |   |          |          |          |   |          |         |          |   |          |          |          |                                                                                                                                                         |                                                                                                                                                                                                                                                                                                                                                                                                                                                                                                                                                                                                                                                                                                                                                                                                                                                                                                                                                                                                                                                                                                                                                                                                                                                                                                                                                                                                                                                                                                                                                                                                                                                                                                                                                                                                                                                                                                                                   |         |          |          |          |         |          |                                                                                                                                                        |                                                                                                                                                                                                                                                                                                                                                                                                                                                                                                                                                                                                                                                                                                                                                                                                                                                                                                                                                                                                                                                                                                                                                                                                                                                                                                                                                                                                                                                                                                                                                                                                                                                                                                                                                                                                                                                                                                                                                                                                                                                                             |   |          |          |          |   |          |          |          |   |          |          |          |   |          |          |          |   |          |          |          |   |          |          |          |   |          |          |          |   |          |          |          |   |          |          |         |   |          |          |         |   |          |          |          |   |          |          |          |   |          |          |          |   |          |          |          |   |          |          |          |   |          |          |          |   |          |          |          |   |          |          |          |    |          |          |          |    |          |          |          |   |          |          |          |   |          |          |          |   |          |          |          |   |          |          |          |   |          |          |         |   |          |          |         |   |          |          |         |   |          |          |         |
| H                                                                                                                                                       | -1.92603                                                                                                                                                                                                                                                                                                                                                                                                                                                                                                                                                                                                                                                                                                                                                                                                                                                                                                                                                                                                                                                                                                                                                                                                                                                                                                                                                                                                                                                                                                                                                                                                                                                                                                                                                                                                                                                                                                                                                                                                                                                               | 1.51721  | 3.77281  |          |          |   |          |          |          |   |          |          |          |   |          |         |          |   |          |         |          |   |          |          |          |   |          |          |          |   |          |         |          |   |          |          |         |   |          |          |         |   |          |          |         |   |          |          |         |   |          |         |         |   |          |          |         |   |          |          |         |   |          |          |          |   |          |          |         |   |          |          |          |    |          |          |          |    |          |          |         |   |          |          |          |   |          |          |          |   |          |          |          |   |          |          |          |   |          |         |          |   |          |          |          |                                                                                                                                                         |                                                                                                                                                                                                                                                                                                                                                                                                                                                                                                                                                                                                                                                                                                                                                                                                                                                                                                                                                                                                                                                                                                                                                                                                                                                                                                                                                                                                                                                                                                                                                                                                                                                                                                                                                                                                                                                                                                                                   |         |          |          |          |         |          |                                                                                                                                                        |                                                                                                                                                                                                                                                                                                                                                                                                                                                                                                                                                                                                                                                                                                                                                                                                                                                                                                                                                                                                                                                                                                                                                                                                                                                                                                                                                                                                                                                                                                                                                                                                                                                                                                                                                                                                                                                                                                                                                                                                                                                                             |   |          |          |          |   |          |          |          |   |          |          |          |   |          |          |          |   |          |          |          |   |          |          |          |   |          |          |          |   |          |          |          |   |          |          |         |   |          |          |         |   |          |          |          |   |          |          |          |   |          |          |          |   |          |          |          |   |          |          |          |   |          |          |          |   |          |          |          |   |          |          |          |    |          |          |          |    |          |          |          |   |          |          |          |   |          |          |          |   |          |          |          |   |          |          |          |   |          |          |         |   |          |          |         |   |          |          |         |   |          |          |         |
| H                                                                                                                                                       | 2.28399                                                                                                                                                                                                                                                                                                                                                                                                                                                                                                                                                                                                                                                                                                                                                                                                                                                                                                                                                                                                                                                                                                                                                                                                                                                                                                                                                                                                                                                                                                                                                                                                                                                                                                                                                                                                                                                                                                                                                                                                                                                                | 0.95200  | 3.26529  |          |          |   |          |          |          |   |          |          |          |   |          |         |          |   |          |         |          |   |          |          |          |   |          |          |          |   |          |         |          |   |          |          |         |   |          |          |         |   |          |          |         |   |          |          |         |   |          |         |         |   |          |          |         |   |          |          |         |   |          |          |          |   |          |          |         |   |          |          |          |    |          |          |          |    |          |          |         |   |          |          |          |   |          |          |          |   |          |          |          |   |          |          |          |   |          |         |          |   |          |          |          |                                                                                                                                                         |                                                                                                                                                                                                                                                                                                                                                                                                                                                                                                                                                                                                                                                                                                                                                                                                                                                                                                                                                                                                                                                                                                                                                                                                                                                                                                                                                                                                                                                                                                                                                                                                                                                                                                                                                                                                                                                                                                                                   |         |          |          |          |         |          |                                                                                                                                                        |                                                                                                                                                                                                                                                                                                                                                                                                                                                                                                                                                                                                                                                                                                                                                                                                                                                                                                                                                                                                                                                                                                                                                                                                                                                                                                                                                                                                                                                                                                                                                                                                                                                                                                                                                                                                                                                                                                                                                                                                                                                                             |   |          |          |          |   |          |          |          |   |          |          |          |   |          |          |          |   |          |          |          |   |          |          |          |   |          |          |          |   |          |          |          |   |          |          |         |   |          |          |         |   |          |          |          |   |          |          |          |   |          |          |          |   |          |          |          |   |          |          |          |   |          |          |          |   |          |          |          |   |          |          |          |    |          |          |          |    |          |          |          |   |          |          |          |   |          |          |          |   |          |          |          |   |          |          |          |   |          |          |         |   |          |          |         |   |          |          |         |   |          |          |         |
| H                                                                                                                                                       | -0.94689                                                                                                                                                                                                                                                                                                                                                                                                                                                                                                                                                                                                                                                                                                                                                                                                                                                                                                                                                                                                                                                                                                                                                                                                                                                                                                                                                                                                                                                                                                                                                                                                                                                                                                                                                                                                                                                                                                                                                                                                                                                               | 3.00412  | -3.22809 |          |          |   |          |          |          |   |          |          |          |   |          |         |          |   |          |         |          |   |          |          |          |   |          |          |          |   |          |         |          |   |          |          |         |   |          |          |         |   |          |          |         |   |          |          |         |   |          |         |         |   |          |          |         |   |          |          |         |   |          |          |          |   |          |          |         |   |          |          |          |    |          |          |          |    |          |          |         |   |          |          |          |   |          |          |          |   |          |          |          |   |          |          |          |   |          |         |          |   |          |          |          |                                                                                                                                                         |                                                                                                                                                                                                                                                                                                                                                                                                                                                                                                                                                                                                                                                                                                                                                                                                                                                                                                                                                                                                                                                                                                                                                                                                                                                                                                                                                                                                                                                                                                                                                                                                                                                                                                                                                                                                                                                                                                                                   |         |          |          |          |         |          |                                                                                                                                                        |                                                                                                                                                                                                                                                                                                                                                                                                                                                                                                                                                                                                                                                                                                                                                                                                                                                                                                                                                                                                                                                                                                                                                                                                                                                                                                                                                                                                                                                                                                                                                                                                                                                                                                                                                                                                                                                                                                                                                                                                                                                                             |   |          |          |          |   |          |          |          |   |          |          |          |   |          |          |          |   |          |          |          |   |          |          |          |   |          |          |          |   |          |          |          |   |          |          |         |   |          |          |         |   |          |          |          |   |          |          |          |   |          |          |          |   |          |          |          |   |          |          |          |   |          |          |          |   |          |          |          |   |          |          |          |    |          |          |          |    |          |          |          |   |          |          |          |   |          |          |          |   |          |          |          |   |          |          |          |   |          |          |         |   |          |          |         |   |          |          |         |   |          |          |         |
| Br                                                                                                                                                      | -0.24390                                                                                                                                                                                                                                                                                                                                                                                                                                                                                                                                                                                                                                                                                                                                                                                                                                                                                                                                                                                                                                                                                                                                                                                                                                                                                                                                                                                                                                                                                                                                                                                                                                                                                                                                                                                                                                                                                                                                                                                                                                                               | -1.91831 | -0.31101 |          |          |   |          |          |          |   |          |          |          |   |          |         |          |   |          |         |          |   |          |          |          |   |          |          |          |   |          |         |          |   |          |          |         |   |          |          |         |   |          |          |         |   |          |          |         |   |          |         |         |   |          |          |         |   |          |          |         |   |          |          |          |   |          |          |         |   |          |          |          |    |          |          |          |    |          |          |         |   |          |          |          |   |          |          |          |   |          |          |          |   |          |          |          |   |          |         |          |   |          |          |          |                                                                                                                                                         |                                                                                                                                                                                                                                                                                                                                                                                                                                                                                                                                                                                                                                                                                                                                                                                                                                                                                                                                                                                                                                                                                                                                                                                                                                                                                                                                                                                                                                                                                                                                                                                                                                                                                                                                                                                                                                                                                                                                   |         |          |          |          |         |          |                                                                                                                                                        |                                                                                                                                                                                                                                                                                                                                                                                                                                                                                                                                                                                                                                                                                                                                                                                                                                                                                                                                                                                                                                                                                                                                                                                                                                                                                                                                                                                                                                                                                                                                                                                                                                                                                                                                                                                                                                                                                                                                                                                                                                                                             |   |          |          |          |   |          |          |          |   |          |          |          |   |          |          |          |   |          |          |          |   |          |          |          |   |          |          |          |   |          |          |          |   |          |          |         |   |          |          |         |   |          |          |          |   |          |          |          |   |          |          |          |   |          |          |          |   |          |          |          |   |          |          |          |   |          |          |          |   |          |          |          |    |          |          |          |    |          |          |          |   |          |          |          |   |          |          |          |   |          |          |          |   |          |          |          |   |          |          |         |   |          |          |         |   |          |          |         |   |          |          |         |
| Br                                                                                                                                                      | 2.65200                                                                                                                                                                                                                                                                                                                                                                                                                                                                                                                                                                                                                                                                                                                                                                                                                                                                                                                                                                                                                                                                                                                                                                                                                                                                                                                                                                                                                                                                                                                                                                                                                                                                                                                                                                                                                                                                                                                                                                                                                                                                | 0.67430  | 0.37181  |          |          |   |          |          |          |   |          |          |          |   |          |         |          |   |          |         |          |   |          |          |          |   |          |          |          |   |          |         |          |   |          |          |         |   |          |          |         |   |          |          |         |   |          |          |         |   |          |         |         |   |          |          |         |   |          |          |         |   |          |          |          |   |          |          |         |   |          |          |          |    |          |          |          |    |          |          |         |   |          |          |          |   |          |          |          |   |          |          |          |   |          |          |          |   |          |         |          |   |          |          |          |                                                                                                                                                         |                                                                                                                                                                                                                                                                                                                                                                                                                                                                                                                                                                                                                                                                                                                                                                                                                                                                                                                                                                                                                                                                                                                                                                                                                                                                                                                                                                                                                                                                                                                                                                                                                                                                                                                                                                                                                                                                                                                                   |         |          |          |          |         |          |                                                                                                                                                        |                                                                                                                                                                                                                                                                                                                                                                                                                                                                                                                                                                                                                                                                                                                                                                                                                                                                                                                                                                                                                                                                                                                                                                                                                                                                                                                                                                                                                                                                                                                                                                                                                                                                                                                                                                                                                                                                                                                                                                                                                                                                             |   |          |          |          |   |          |          |          |   |          |          |          |   |          |          |          |   |          |          |          |   |          |          |          |   |          |          |          |   |          |          |          |   |          |          |         |   |          |          |         |   |          |          |          |   |          |          |          |   |          |          |          |   |          |          |          |   |          |          |          |   |          |          |          |   |          |          |          |   |          |          |          |    |          |          |          |    |          |          |          |   |          |          |          |   |          |          |          |   |          |          |          |   |          |          |          |   |          |          |         |   |          |          |         |   |          |          |         |   |          |          |         |
| C                                                                                                                                                       | -1.10371                                                                                                                                                                                                                                                                                                                                                                                                                                                                                                                                                                                                                                                                                                                                                                                                                                                                                                                                                                                                                                                                                                                                                                                                                                                                                                                                                                                                                                                                                                                                                                                                                                                                                                                                                                                                                                                                                                                                                                                                                                                               | 0.87709  | -4.79700 |          |          |   |          |          |          |   |          |          |          |   |          |         |          |   |          |         |          |   |          |          |          |   |          |          |          |   |          |         |          |   |          |          |         |   |          |          |         |   |          |          |         |   |          |          |         |   |          |         |         |   |          |          |         |   |          |          |         |   |          |          |          |   |          |          |         |   |          |          |          |    |          |          |          |    |          |          |         |   |          |          |          |   |          |          |          |   |          |          |          |   |          |          |          |   |          |         |          |   |          |          |          |                                                                                                                                                         |                                                                                                                                                                                                                                                                                                                                                                                                                                                                                                                                                                                                                                                                                                                                                                                                                                                                                                                                                                                                                                                                                                                                                                                                                                                                                                                                                                                                                                                                                                                                                                                                                                                                                                                                                                                                                                                                                                                                   |         |          |          |          |         |          |                                                                                                                                                        |                                                                                                                                                                                                                                                                                                                                                                                                                                                                                                                                                                                                                                                                                                                                                                                                                                                                                                                                                                                                                                                                                                                                                                                                                                                                                                                                                                                                                                                                                                                                                                                                                                                                                                                                                                                                                                                                                                                                                                                                                                                                             |   |          |          |          |   |          |          |          |   |          |          |          |   |          |          |          |   |          |          |          |   |          |          |          |   |          |          |          |   |          |          |          |   |          |          |         |   |          |          |         |   |          |          |          |   |          |          |          |   |          |          |          |   |          |          |          |   |          |          |          |   |          |          |          |   |          |          |          |   |          |          |          |    |          |          |          |    |          |          |          |   |          |          |          |   |          |          |          |   |          |          |          |   |          |          |          |   |          |          |         |   |          |          |         |   |          |          |         |   |          |          |         |
| O                                                                                                                                                       | -1.26431                                                                                                                                                                                                                                                                                                                                                                                                                                                                                                                                                                                                                                                                                                                                                                                                                                                                                                                                                                                                                                                                                                                                                                                                                                                                                                                                                                                                                                                                                                                                                                                                                                                                                                                                                                                                                                                                                                                                                                                                                                                               | 1.87319  | -5.45781 |          |          |   |          |          |          |   |          |          |          |   |          |         |          |   |          |         |          |   |          |          |          |   |          |          |          |   |          |         |          |   |          |          |         |   |          |          |         |   |          |          |         |   |          |          |         |   |          |         |         |   |          |          |         |   |          |          |         |   |          |          |          |   |          |          |         |   |          |          |          |    |          |          |          |    |          |          |         |   |          |          |          |   |          |          |          |   |          |          |          |   |          |          |          |   |          |         |          |   |          |          |          |                                                                                                                                                         |                                                                                                                                                                                                                                                                                                                                                                                                                                                                                                                                                                                                                                                                                                                                                                                                                                                                                                                                                                                                                                                                                                                                                                                                                                                                                                                                                                                                                                                                                                                                                                                                                                                                                                                                                                                                                                                                                                                                   |         |          |          |          |         |          |                                                                                                                                                        |                                                                                                                                                                                                                                                                                                                                                                                                                                                                                                                                                                                                                                                                                                                                                                                                                                                                                                                                                                                                                                                                                                                                                                                                                                                                                                                                                                                                                                                                                                                                                                                                                                                                                                                                                                                                                                                                                                                                                                                                                                                                             |   |          |          |          |   |          |          |          |   |          |          |          |   |          |          |          |   |          |          |          |   |          |          |          |   |          |          |          |   |          |          |          |   |          |          |         |   |          |          |         |   |          |          |          |   |          |          |          |   |          |          |          |   |          |          |          |   |          |          |          |   |          |          |          |   |          |          |          |   |          |          |          |    |          |          |          |    |          |          |          |   |          |          |          |   |          |          |          |   |          |          |          |   |          |          |          |   |          |          |         |   |          |          |         |   |          |          |         |   |          |          |         |
| O                                                                                                                                                       | -1.13170                                                                                                                                                                                                                                                                                                                                                                                                                                                                                                                                                                                                                                                                                                                                                                                                                                                                                                                                                                                                                                                                                                                                                                                                                                                                                                                                                                                                                                                                                                                                                                                                                                                                                                                                                                                                                                                                                                                                                                                                                                                               | -0.36477 | -5.33630 |          |          |   |          |          |          |   |          |          |          |   |          |         |          |   |          |         |          |   |          |          |          |   |          |          |          |   |          |         |          |   |          |          |         |   |          |          |         |   |          |          |         |   |          |          |         |   |          |         |         |   |          |          |         |   |          |          |         |   |          |          |          |   |          |          |         |   |          |          |          |    |          |          |          |    |          |          |         |   |          |          |          |   |          |          |          |   |          |          |          |   |          |          |          |   |          |         |          |   |          |          |          |                                                                                                                                                         |                                                                                                                                                                                                                                                                                                                                                                                                                                                                                                                                                                                                                                                                                                                                                                                                                                                                                                                                                                                                                                                                                                                                                                                                                                                                                                                                                                                                                                                                                                                                                                                                                                                                                                                                                                                                                                                                                                                                   |         |          |          |          |         |          |                                                                                                                                                        |                                                                                                                                                                                                                                                                                                                                                                                                                                                                                                                                                                                                                                                                                                                                                                                                                                                                                                                                                                                                                                                                                                                                                                                                                                                                                                                                                                                                                                                                                                                                                                                                                                                                                                                                                                                                                                                                                                                                                                                                                                                                             |   |          |          |          |   |          |          |          |   |          |          |          |   |          |          |          |   |          |          |          |   |          |          |          |   |          |          |          |   |          |          |          |   |          |          |         |   |          |          |         |   |          |          |          |   |          |          |          |   |          |          |          |   |          |          |          |   |          |          |          |   |          |          |          |   |          |          |          |   |          |          |          |    |          |          |          |    |          |          |          |   |          |          |          |   |          |          |          |   |          |          |          |   |          |          |          |   |          |          |         |   |          |          |         |   |          |          |         |   |          |          |         |
| H                                                                                                                                                       | -1.29480                                                                                                                                                                                                                                                                                                                                                                                                                                                                                                                                                                                                                                                                                                                                                                                                                                                                                                                                                                                                                                                                                                                                                                                                                                                                                                                                                                                                                                                                                                                                                                                                                                                                                                                                                                                                                                                                                                                                                                                                                                                               | -0.25900 | -6.28362 |          |          |   |          |          |          |   |          |          |          |   |          |         |          |   |          |         |          |   |          |          |          |   |          |          |          |   |          |         |          |   |          |          |         |   |          |          |         |   |          |          |         |   |          |          |         |   |          |         |         |   |          |          |         |   |          |          |         |   |          |          |          |   |          |          |         |   |          |          |          |    |          |          |          |    |          |          |         |   |          |          |          |   |          |          |          |   |          |          |          |   |          |          |          |   |          |         |          |   |          |          |          |                                                                                                                                                         |                                                                                                                                                                                                                                                                                                                                                                                                                                                                                                                                                                                                                                                                                                                                                                                                                                                                                                                                                                                                                                                                                                                                                                                                                                                                                                                                                                                                                                                                                                                                                                                                                                                                                                                                                                                                                                                                                                                                   |         |          |          |          |         |          |                                                                                                                                                        |                                                                                                                                                                                                                                                                                                                                                                                                                                                                                                                                                                                                                                                                                                                                                                                                                                                                                                                                                                                                                                                                                                                                                                                                                                                                                                                                                                                                                                                                                                                                                                                                                                                                                                                                                                                                                                                                                                                                                                                                                                                                             |   |          |          |          |   |          |          |          |   |          |          |          |   |          |          |          |   |          |          |          |   |          |          |          |   |          |          |          |   |          |          |          |   |          |          |         |   |          |          |         |   |          |          |          |   |          |          |          |   |          |          |          |   |          |          |          |   |          |          |          |   |          |          |          |   |          |          |          |   |          |          |          |    |          |          |          |    |          |          |          |   |          |          |          |   |          |          |          |   |          |          |          |   |          |          |          |   |          |          |         |   |          |          |         |   |          |          |         |   |          |          |         |
| C                                                                                                                                                       | 0.32895                                                                                                                                                                                                                                                                                                                                                                                                                                                                                                                                                                                                                                                                                                                                                                                                                                                                                                                                                                                                                                                                                                                                                                                                                                                                                                                                                                                                                                                                                                                                                                                                                                                                                                                                                                                                                                                                                                                                                                                                                                                                | 1.35019  | 5.14959  |          |          |   |          |          |          |   |          |          |          |   |          |         |          |   |          |         |          |   |          |          |          |   |          |          |          |   |          |         |          |   |          |          |         |   |          |          |         |   |          |          |         |   |          |          |         |   |          |         |         |   |          |          |         |   |          |          |         |   |          |          |          |   |          |          |         |   |          |          |          |    |          |          |          |    |          |          |         |   |          |          |          |   |          |          |          |   |          |          |          |   |          |          |          |   |          |         |          |   |          |          |          |                                                                                                                                                         |                                                                                                                                                                                                                                                                                                                                                                                                                                                                                                                                                                                                                                                                                                                                                                                                                                                                                                                                                                                                                                                                                                                                                                                                                                                                                                                                                                                                                                                                                                                                                                                                                                                                                                                                                                                                                                                                                                                                   |         |          |          |          |         |          |                                                                                                                                                        |                                                                                                                                                                                                                                                                                                                                                                                                                                                                                                                                                                                                                                                                                                                                                                                                                                                                                                                                                                                                                                                                                                                                                                                                                                                                                                                                                                                                                                                                                                                                                                                                                                                                                                                                                                                                                                                                                                                                                                                                                                                                             |   |          |          |          |   |          |          |          |   |          |          |          |   |          |          |          |   |          |          |          |   |          |          |          |   |          |          |          |   |          |          |          |   |          |          |         |   |          |          |         |   |          |          |          |   |          |          |          |   |          |          |          |   |          |          |          |   |          |          |          |   |          |          |          |   |          |          |          |   |          |          |          |    |          |          |          |    |          |          |          |   |          |          |          |   |          |          |          |   |          |          |          |   |          |          |          |   |          |          |         |   |          |          |         |   |          |          |         |   |          |          |         |
| O                                                                                                                                                       | -0.59018                                                                                                                                                                                                                                                                                                                                                                                                                                                                                                                                                                                                                                                                                                                                                                                                                                                                                                                                                                                                                                                                                                                                                                                                                                                                                                                                                                                                                                                                                                                                                                                                                                                                                                                                                                                                                                                                                                                                                                                                                                                               | 1.53231  | 5.90899  |          |          |   |          |          |          |   |          |          |          |   |          |         |          |   |          |         |          |   |          |          |          |   |          |          |          |   |          |         |          |   |          |          |         |   |          |          |         |   |          |          |         |   |          |          |         |   |          |         |         |   |          |          |         |   |          |          |         |   |          |          |          |   |          |          |         |   |          |          |          |    |          |          |          |    |          |          |         |   |          |          |          |   |          |          |          |   |          |          |          |   |          |          |          |   |          |         |          |   |          |          |          |                                                                                                                                                         |                                                                                                                                                                                                                                                                                                                                                                                                                                                                                                                                                                                                                                                                                                                                                                                                                                                                                                                                                                                                                                                                                                                                                                                                                                                                                                                                                                                                                                                                                                                                                                                                                                                                                                                                                                                                                                                                                                                                   |         |          |          |          |         |          |                                                                                                                                                        |                                                                                                                                                                                                                                                                                                                                                                                                                                                                                                                                                                                                                                                                                                                                                                                                                                                                                                                                                                                                                                                                                                                                                                                                                                                                                                                                                                                                                                                                                                                                                                                                                                                                                                                                                                                                                                                                                                                                                                                                                                                                             |   |          |          |          |   |          |          |          |   |          |          |          |   |          |          |          |   |          |          |          |   |          |          |          |   |          |          |          |   |          |          |          |   |          |          |         |   |          |          |         |   |          |          |          |   |          |          |          |   |          |          |          |   |          |          |          |   |          |          |          |   |          |          |          |   |          |          |          |   |          |          |          |    |          |          |          |    |          |          |          |   |          |          |          |   |          |          |          |   |          |          |          |   |          |          |          |   |          |          |         |   |          |          |         |   |          |          |         |   |          |          |         |
| O                                                                                                                                                       | 1.60842                                                                                                                                                                                                                                                                                                                                                                                                                                                                                                                                                                                                                                                                                                                                                                                                                                                                                                                                                                                                                                                                                                                                                                                                                                                                                                                                                                                                                                                                                                                                                                                                                                                                                                                                                                                                                                                                                                                                                                                                                                                                | 1.22390  | 5.57470  |          |          |   |          |          |          |   |          |          |          |   |          |         |          |   |          |         |          |   |          |          |          |   |          |          |          |   |          |         |          |   |          |          |         |   |          |          |         |   |          |          |         |   |          |          |         |   |          |         |         |   |          |          |         |   |          |          |         |   |          |          |          |   |          |          |         |   |          |          |          |    |          |          |          |    |          |          |         |   |          |          |          |   |          |          |          |   |          |          |          |   |          |          |          |   |          |         |          |   |          |          |          |                                                                                                                                                         |                                                                                                                                                                                                                                                                                                                                                                                                                                                                                                                                                                                                                                                                                                                                                                                                                                                                                                                                                                                                                                                                                                                                                                                                                                                                                                                                                                                                                                                                                                                                                                                                                                                                                                                                                                                                                                                                                                                                   |         |          |          |          |         |          |                                                                                                                                                        |                                                                                                                                                                                                                                                                                                                                                                                                                                                                                                                                                                                                                                                                                                                                                                                                                                                                                                                                                                                                                                                                                                                                                                                                                                                                                                                                                                                                                                                                                                                                                                                                                                                                                                                                                                                                                                                                                                                                                                                                                                                                             |   |          |          |          |   |          |          |          |   |          |          |          |   |          |          |          |   |          |          |          |   |          |          |          |   |          |          |          |   |          |          |          |   |          |          |         |   |          |          |         |   |          |          |          |   |          |          |          |   |          |          |          |   |          |          |          |   |          |          |          |   |          |          |          |   |          |          |          |   |          |          |          |    |          |          |          |    |          |          |          |   |          |          |          |   |          |          |          |   |          |          |          |   |          |          |          |   |          |          |         |   |          |          |         |   |          |          |         |   |          |          |         |
| H                                                                                                                                                       | 1.59689                                                                                                                                                                                                                                                                                                                                                                                                                                                                                                                                                                                                                                                                                                                                                                                                                                                                                                                                                                                                                                                                                                                                                                                                                                                                                                                                                                                                                                                                                                                                                                                                                                                                                                                                                                                                                                                                                                                                                                                                                                                                | 1.30720  | 6.53810  |          |          |   |          |          |          |   |          |          |          |   |          |         |          |   |          |         |          |   |          |          |          |   |          |          |          |   |          |         |          |   |          |          |         |   |          |          |         |   |          |          |         |   |          |          |         |   |          |         |         |   |          |          |         |   |          |          |         |   |          |          |          |   |          |          |         |   |          |          |          |    |          |          |          |    |          |          |         |   |          |          |          |   |          |          |          |   |          |          |          |   |          |          |          |   |          |         |          |   |          |          |          |                                                                                                                                                         |                                                                                                                                                                                                                                                                                                                                                                                                                                                                                                                                                                                                                                                                                                                                                                                                                                                                                                                                                                                                                                                                                                                                                                                                                                                                                                                                                                                                                                                                                                                                                                                                                                                                                                                                                                                                                                                                                                                                   |         |          |          |          |         |          |                                                                                                                                                        |                                                                                                                                                                                                                                                                                                                                                                                                                                                                                                                                                                                                                                                                                                                                                                                                                                                                                                                                                                                                                                                                                                                                                                                                                                                                                                                                                                                                                                                                                                                                                                                                                                                                                                                                                                                                                                                                                                                                                                                                                                                                             |   |          |          |          |   |          |          |          |   |          |          |          |   |          |          |          |   |          |          |          |   |          |          |          |   |          |          |          |   |          |          |          |   |          |          |         |   |          |          |         |   |          |          |          |   |          |          |          |   |          |          |          |   |          |          |          |   |          |          |          |   |          |          |          |   |          |          |          |   |          |          |          |    |          |          |          |    |          |          |          |   |          |          |          |   |          |          |          |   |          |          |          |   |          |          |          |   |          |          |         |   |          |          |         |   |          |          |         |   |          |          |         |
| C                                                                                                                                                       | -0.00108                                                                                                                                                                                                                                                                                                                                                                                                                                                                                                                                                                                                                                                                                                                                                                                                                                                                                                                                                                                                                                                                                                                                                                                                                                                                                                                                                                                                                                                                                                                                                                                                                                                                                                                                                                                                                                                                                                                                                                                                                                                               | 0.75667  | -3.55492 |          |          |   |          |          |          |   |          |          |          |   |          |         |          |   |          |         |          |   |          |          |          |   |          |          |          |   |          |         |          |   |          |          |         |   |          |          |         |   |          |          |         |   |          |          |         |   |          |         |         |   |          |          |         |   |          |          |         |   |          |          |          |   |          |          |         |   |          |          |          |    |          |          |          |    |          |          |         |   |          |          |          |   |          |          |          |   |          |          |          |   |          |          |          |   |          |         |          |   |          |          |          |                                                                                                                                                         |                                                                                                                                                                                                                                                                                                                                                                                                                                                                                                                                                                                                                                                                                                                                                                                                                                                                                                                                                                                                                                                                                                                                                                                                                                                                                                                                                                                                                                                                                                                                                                                                                                                                                                                                                                                                                                                                                                                                   |         |          |          |          |         |          |                                                                                                                                                        |                                                                                                                                                                                                                                                                                                                                                                                                                                                                                                                                                                                                                                                                                                                                                                                                                                                                                                                                                                                                                                                                                                                                                                                                                                                                                                                                                                                                                                                                                                                                                                                                                                                                                                                                                                                                                                                                                                                                                                                                                                                                             |   |          |          |          |   |          |          |          |   |          |          |          |   |          |          |          |   |          |          |          |   |          |          |          |   |          |          |          |   |          |          |          |   |          |          |         |   |          |          |         |   |          |          |          |   |          |          |          |   |          |          |          |   |          |          |          |   |          |          |          |   |          |          |          |   |          |          |          |   |          |          |          |    |          |          |          |    |          |          |          |   |          |          |          |   |          |          |          |   |          |          |          |   |          |          |          |   |          |          |         |   |          |          |         |   |          |          |         |   |          |          |         |
| C                                                                                                                                                       | -0.00134                                                                                                                                                                                                                                                                                                                                                                                                                                                                                                                                                                                                                                                                                                                                                                                                                                                                                                                                                                                                                                                                                                                                                                                                                                                                                                                                                                                                                                                                                                                                                                                                                                                                                                                                                                                                                                                                                                                                                                                                                                                               | 0.10049  | -0.74719 |          |          |   |          |          |          |   |          |          |          |   |          |         |          |   |          |         |          |   |          |          |          |   |          |          |          |   |          |         |          |   |          |          |         |   |          |          |         |   |          |          |         |   |          |          |         |   |          |         |         |   |          |          |         |   |          |          |         |   |          |          |          |   |          |          |         |   |          |          |          |    |          |          |          |    |          |          |         |   |          |          |          |   |          |          |          |   |          |          |          |   |          |          |          |   |          |         |          |   |          |          |          |                                                                                                                                                         |                                                                                                                                                                                                                                                                                                                                                                                                                                                                                                                                                                                                                                                                                                                                                                                                                                                                                                                                                                                                                                                                                                                                                                                                                                                                                                                                                                                                                                                                                                                                                                                                                                                                                                                                                                                                                                                                                                                                   |         |          |          |          |         |          |                                                                                                                                                        |                                                                                                                                                                                                                                                                                                                                                                                                                                                                                                                                                                                                                                                                                                                                                                                                                                                                                                                                                                                                                                                                                                                                                                                                                                                                                                                                                                                                                                                                                                                                                                                                                                                                                                                                                                                                                                                                                                                                                                                                                                                                             |   |          |          |          |   |          |          |          |   |          |          |          |   |          |          |          |   |          |          |          |   |          |          |          |   |          |          |          |   |          |          |          |   |          |          |         |   |          |          |         |   |          |          |          |   |          |          |          |   |          |          |          |   |          |          |          |   |          |          |          |   |          |          |          |   |          |          |          |   |          |          |          |    |          |          |          |    |          |          |          |   |          |          |          |   |          |          |          |   |          |          |          |   |          |          |          |   |          |          |         |   |          |          |         |   |          |          |         |   |          |          |         |
| C                                                                                                                                                       | -0.00274                                                                                                                                                                                                                                                                                                                                                                                                                                                                                                                                                                                                                                                                                                                                                                                                                                                                                                                                                                                                                                                                                                                                                                                                                                                                                                                                                                                                                                                                                                                                                                                                                                                                                                                                                                                                                                                                                                                                                                                                                                                               | -0.56213 | -3.12149 |          |          |   |          |          |          |   |          |          |          |   |          |         |          |   |          |         |          |   |          |          |          |   |          |          |          |   |          |         |          |   |          |          |         |   |          |          |         |   |          |          |         |   |          |          |         |   |          |         |         |   |          |          |         |   |          |          |         |   |          |          |          |   |          |          |         |   |          |          |          |    |          |          |          |    |          |          |         |   |          |          |          |   |          |          |          |   |          |          |          |   |          |          |          |   |          |         |          |   |          |          |          |                                                                                                                                                         |                                                                                                                                                                                                                                                                                                                                                                                                                                                                                                                                                                                                                                                                                                                                                                                                                                                                                                                                                                                                                                                                                                                                                                                                                                                                                                                                                                                                                                                                                                                                                                                                                                                                                                                                                                                                                                                                                                                                   |         |          |          |          |         |          |                                                                                                                                                        |                                                                                                                                                                                                                                                                                                                                                                                                                                                                                                                                                                                                                                                                                                                                                                                                                                                                                                                                                                                                                                                                                                                                                                                                                                                                                                                                                                                                                                                                                                                                                                                                                                                                                                                                                                                                                                                                                                                                                                                                                                                                             |   |          |          |          |   |          |          |          |   |          |          |          |   |          |          |          |   |          |          |          |   |          |          |          |   |          |          |          |   |          |          |          |   |          |          |         |   |          |          |         |   |          |          |          |   |          |          |          |   |          |          |          |   |          |          |          |   |          |          |          |   |          |          |          |   |          |          |          |   |          |          |          |    |          |          |          |    |          |          |          |   |          |          |          |   |          |          |          |   |          |          |          |   |          |          |          |   |          |          |         |   |          |          |         |   |          |          |         |   |          |          |         |
| C                                                                                                                                                       | 0.00070                                                                                                                                                                                                                                                                                                                                                                                                                                                                                                                                                                                                                                                                                                                                                                                                                                                                                                                                                                                                                                                                                                                                                                                                                                                                                                                                                                                                                                                                                                                                                                                                                                                                                                                                                                                                                                                                                                                                                                                                                                                                | 1.75671  | -2.59373 |          |          |   |          |          |          |   |          |          |          |   |          |         |          |   |          |         |          |   |          |          |          |   |          |          |          |   |          |         |          |   |          |          |         |   |          |          |         |   |          |          |         |   |          |          |         |   |          |         |         |   |          |          |         |   |          |          |         |   |          |          |          |   |          |          |         |   |          |          |          |    |          |          |          |    |          |          |         |   |          |          |          |   |          |          |          |   |          |          |          |   |          |          |          |   |          |         |          |   |          |          |          |                                                                                                                                                         |                                                                                                                                                                                                                                                                                                                                                                                                                                                                                                                                                                                                                                                                                                                                                                                                                                                                                                                                                                                                                                                                                                                                                                                                                                                                                                                                                                                                                                                                                                                                                                                                                                                                                                                                                                                                                                                                                                                                   |         |          |          |          |         |          |                                                                                                                                                        |                                                                                                                                                                                                                                                                                                                                                                                                                                                                                                                                                                                                                                                                                                                                                                                                                                                                                                                                                                                                                                                                                                                                                                                                                                                                                                                                                                                                                                                                                                                                                                                                                                                                                                                                                                                                                                                                                                                                                                                                                                                                             |   |          |          |          |   |          |          |          |   |          |          |          |   |          |          |          |   |          |          |          |   |          |          |          |   |          |          |          |   |          |          |          |   |          |          |         |   |          |          |         |   |          |          |          |   |          |          |          |   |          |          |          |   |          |          |          |   |          |          |          |   |          |          |          |   |          |          |          |   |          |          |          |    |          |          |          |    |          |          |          |   |          |          |          |   |          |          |          |   |          |          |          |   |          |          |          |   |          |          |         |   |          |          |         |   |          |          |         |   |          |          |         |
| C                                                                                                                                                       | 0.00055                                                                                                                                                                                                                                                                                                                                                                                                                                                                                                                                                                                                                                                                                                                                                                                                                                                                                                                                                                                                                                                                                                                                                                                                                                                                                                                                                                                                                                                                                                                                                                                                                                                                                                                                                                                                                                                                                                                                                                                                                                                                | 1.41456  | -1.25611 |          |          |   |          |          |          |   |          |          |          |   |          |         |          |   |          |         |          |   |          |          |          |   |          |          |          |   |          |         |          |   |          |          |         |   |          |          |         |   |          |          |         |   |          |          |         |   |          |         |         |   |          |          |         |   |          |          |         |   |          |          |          |   |          |          |         |   |          |          |          |    |          |          |          |    |          |          |         |   |          |          |          |   |          |          |          |   |          |          |          |   |          |          |          |   |          |         |          |   |          |          |          |                                                                                                                                                         |                                                                                                                                                                                                                                                                                                                                                                                                                                                                                                                                                                                                                                                                                                                                                                                                                                                                                                                                                                                                                                                                                                                                                                                                                                                                                                                                                                                                                                                                                                                                                                                                                                                                                                                                                                                                                                                                                                                                   |         |          |          |          |         |          |                                                                                                                                                        |                                                                                                                                                                                                                                                                                                                                                                                                                                                                                                                                                                                                                                                                                                                                                                                                                                                                                                                                                                                                                                                                                                                                                                                                                                                                                                                                                                                                                                                                                                                                                                                                                                                                                                                                                                                                                                                                                                                                                                                                                                                                             |   |          |          |          |   |          |          |          |   |          |          |          |   |          |          |          |   |          |          |          |   |          |          |          |   |          |          |          |   |          |          |          |   |          |          |         |   |          |          |         |   |          |          |          |   |          |          |          |   |          |          |          |   |          |          |          |   |          |          |          |   |          |          |          |   |          |          |          |   |          |          |          |    |          |          |          |    |          |          |          |   |          |          |          |   |          |          |          |   |          |          |          |   |          |          |          |   |          |          |         |   |          |          |         |   |          |          |         |   |          |          |         |
| C                                                                                                                                                       | -0.00280                                                                                                                                                                                                                                                                                                                                                                                                                                                                                                                                                                                                                                                                                                                                                                                                                                                                                                                                                                                                                                                                                                                                                                                                                                                                                                                                                                                                                                                                                                                                                                                                                                                                                                                                                                                                                                                                                                                                                                                                                                                               | -0.89849 | -1.77240 |          |          |   |          |          |          |   |          |          |          |   |          |         |          |   |          |         |          |   |          |          |          |   |          |          |          |   |          |         |          |   |          |          |         |   |          |          |         |   |          |          |         |   |          |          |         |   |          |         |         |   |          |          |         |   |          |          |         |   |          |          |          |   |          |          |         |   |          |          |          |    |          |          |          |    |          |          |         |   |          |          |          |   |          |          |          |   |          |          |          |   |          |          |          |   |          |         |          |   |          |          |          |                                                                                                                                                         |                                                                                                                                                                                                                                                                                                                                                                                                                                                                                                                                                                                                                                                                                                                                                                                                                                                                                                                                                                                                                                                                                                                                                                                                                                                                                                                                                                                                                                                                                                                                                                                                                                                                                                                                                                                                                                                                                                                                   |         |          |          |          |         |          |                                                                                                                                                        |                                                                                                                                                                                                                                                                                                                                                                                                                                                                                                                                                                                                                                                                                                                                                                                                                                                                                                                                                                                                                                                                                                                                                                                                                                                                                                                                                                                                                                                                                                                                                                                                                                                                                                                                                                                                                                                                                                                                                                                                                                                                             |   |          |          |          |   |          |          |          |   |          |          |          |   |          |          |          |   |          |          |          |   |          |          |          |   |          |          |          |   |          |          |          |   |          |          |         |   |          |          |         |   |          |          |          |   |          |          |          |   |          |          |          |   |          |          |          |   |          |          |          |   |          |          |          |   |          |          |          |   |          |          |          |    |          |          |          |    |          |          |          |   |          |          |          |   |          |          |          |   |          |          |          |   |          |          |          |   |          |          |         |   |          |          |         |   |          |          |         |   |          |          |         |
| H                                                                                                                                                       | -0.00395                                                                                                                                                                                                                                                                                                                                                                                                                                                                                                                                                                                                                                                                                                                                                                                                                                                                                                                                                                                                                                                                                                                                                                                                                                                                                                                                                                                                                                                                                                                                                                                                                                                                                                                                                                                                                                                                                                                                                                                                                                                               | -1.33832 | -3.87185 |          |          |   |          |          |          |   |          |          |          |   |          |         |          |   |          |         |          |   |          |          |          |   |          |          |          |   |          |         |          |   |          |          |         |   |          |          |         |   |          |          |         |   |          |          |         |   |          |         |         |   |          |          |         |   |          |          |         |   |          |          |          |   |          |          |         |   |          |          |          |    |          |          |          |    |          |          |         |   |          |          |          |   |          |          |          |   |          |          |          |   |          |          |          |   |          |         |          |   |          |          |          |                                                                                                                                                         |                                                                                                                                                                                                                                                                                                                                                                                                                                                                                                                                                                                                                                                                                                                                                                                                                                                                                                                                                                                                                                                                                                                                                                                                                                                                                                                                                                                                                                                                                                                                                                                                                                                                                                                                                                                                                                                                                                                                   |         |          |          |          |         |          |                                                                                                                                                        |                                                                                                                                                                                                                                                                                                                                                                                                                                                                                                                                                                                                                                                                                                                                                                                                                                                                                                                                                                                                                                                                                                                                                                                                                                                                                                                                                                                                                                                                                                                                                                                                                                                                                                                                                                                                                                                                                                                                                                                                                                                                             |   |          |          |          |   |          |          |          |   |          |          |          |   |          |          |          |   |          |          |          |   |          |          |          |   |          |          |          |   |          |          |          |   |          |          |         |   |          |          |         |   |          |          |          |   |          |          |          |   |          |          |          |   |          |          |          |   |          |          |          |   |          |          |          |   |          |          |          |   |          |          |          |    |          |          |          |    |          |          |          |   |          |          |          |   |          |          |          |   |          |          |          |   |          |          |          |   |          |          |         |   |          |          |         |   |          |          |         |   |          |          |         |
| H                                                                                                                                                       | 0.00200                                                                                                                                                                                                                                                                                                                                                                                                                                                                                                                                                                                                                                                                                                                                                                                                                                                                                                                                                                                                                                                                                                                                                                                                                                                                                                                                                                                                                                                                                                                                                                                                                                                                                                                                                                                                                                                                                                                                                                                                                                                                | 2.22763  | -0.56266 |          |          |   |          |          |          |   |          |          |          |   |          |         |          |   |          |         |          |   |          |          |          |   |          |          |          |   |          |         |          |   |          |          |         |   |          |          |         |   |          |          |         |   |          |          |         |   |          |         |         |   |          |          |         |   |          |          |         |   |          |          |          |   |          |          |         |   |          |          |          |    |          |          |          |    |          |          |         |   |          |          |          |   |          |          |          |   |          |          |          |   |          |          |          |   |          |         |          |   |          |          |          |                                                                                                                                                         |                                                                                                                                                                                                                                                                                                                                                                                                                                                                                                                                                                                                                                                                                                                                                                                                                                                                                                                                                                                                                                                                                                                                                                                                                                                                                                                                                                                                                                                                                                                                                                                                                                                                                                                                                                                                                                                                                                                                   |         |          |          |          |         |          |                                                                                                                                                        |                                                                                                                                                                                                                                                                                                                                                                                                                                                                                                                                                                                                                                                                                                                                                                                                                                                                                                                                                                                                                                                                                                                                                                                                                                                                                                                                                                                                                                                                                                                                                                                                                                                                                                                                                                                                                                                                                                                                                                                                                                                                             |   |          |          |          |   |          |          |          |   |          |          |          |   |          |          |          |   |          |          |          |   |          |          |          |   |          |          |          |   |          |          |          |   |          |          |         |   |          |          |         |   |          |          |          |   |          |          |          |   |          |          |          |   |          |          |          |   |          |          |          |   |          |          |          |   |          |          |          |   |          |          |          |    |          |          |          |    |          |          |          |   |          |          |          |   |          |          |          |   |          |          |          |   |          |          |          |   |          |          |         |   |          |          |         |   |          |          |         |   |          |          |         |
| C                                                                                                                                                       | -0.00148                                                                                                                                                                                                                                                                                                                                                                                                                                                                                                                                                                                                                                                                                                                                                                                                                                                                                                                                                                                                                                                                                                                                                                                                                                                                                                                                                                                                                                                                                                                                                                                                                                                                                                                                                                                                                                                                                                                                                                                                                                                               | -0.10044 | 0.74716  |          |          |   |          |          |          |   |          |          |          |   |          |         |          |   |          |         |          |   |          |          |          |   |          |          |          |   |          |         |          |   |          |          |         |   |          |          |         |   |          |          |         |   |          |          |         |   |          |         |         |   |          |          |         |   |          |          |         |   |          |          |          |   |          |          |         |   |          |          |          |    |          |          |          |    |          |          |         |   |          |          |          |   |          |          |          |   |          |          |          |   |          |          |          |   |          |         |          |   |          |          |          |                                                                                                                                                         |                                                                                                                                                                                                                                                                                                                                                                                                                                                                                                                                                                                                                                                                                                                                                                                                                                                                                                                                                                                                                                                                                                                                                                                                                                                                                                                                                                                                                                                                                                                                                                                                                                                                                                                                                                                                                                                                                                                                   |         |          |          |          |         |          |                                                                                                                                                        |                                                                                                                                                                                                                                                                                                                                                                                                                                                                                                                                                                                                                                                                                                                                                                                                                                                                                                                                                                                                                                                                                                                                                                                                                                                                                                                                                                                                                                                                                                                                                                                                                                                                                                                                                                                                                                                                                                                                                                                                                                                                             |   |          |          |          |   |          |          |          |   |          |          |          |   |          |          |          |   |          |          |          |   |          |          |          |   |          |          |          |   |          |          |          |   |          |          |         |   |          |          |         |   |          |          |          |   |          |          |          |   |          |          |          |   |          |          |          |   |          |          |          |   |          |          |          |   |          |          |          |   |          |          |          |    |          |          |          |    |          |          |          |   |          |          |          |   |          |          |          |   |          |          |          |   |          |          |          |   |          |          |         |   |          |          |         |   |          |          |         |   |          |          |         |
| C                                                                                                                                                       | -0.00114                                                                                                                                                                                                                                                                                                                                                                                                                                                                                                                                                                                                                                                                                                                                                                                                                                                                                                                                                                                                                                                                                                                                                                                                                                                                                                                                                                                                                                                                                                                                                                                                                                                                                                                                                                                                                                                                                                                                                                                                                                                               | -0.75661 | 3.55488  |          |          |   |          |          |          |   |          |          |          |   |          |         |          |   |          |         |          |   |          |          |          |   |          |          |          |   |          |         |          |   |          |          |         |   |          |          |         |   |          |          |         |   |          |          |         |   |          |         |         |   |          |          |         |   |          |          |         |   |          |          |          |   |          |          |         |   |          |          |          |    |          |          |          |    |          |          |         |   |          |          |          |   |          |          |          |   |          |          |          |   |          |          |          |   |          |         |          |   |          |          |          |                                                                                                                                                         |                                                                                                                                                                                                                                                                                                                                                                                                                                                                                                                                                                                                                                                                                                                                                                                                                                                                                                                                                                                                                                                                                                                                                                                                                                                                                                                                                                                                                                                                                                                                                                                                                                                                                                                                                                                                                                                                                                                                   |         |          |          |          |         |          |                                                                                                                                                        |                                                                                                                                                                                                                                                                                                                                                                                                                                                                                                                                                                                                                                                                                                                                                                                                                                                                                                                                                                                                                                                                                                                                                                                                                                                                                                                                                                                                                                                                                                                                                                                                                                                                                                                                                                                                                                                                                                                                                                                                                                                                             |   |          |          |          |   |          |          |          |   |          |          |          |   |          |          |          |   |          |          |          |   |          |          |          |   |          |          |          |   |          |          |          |   |          |          |         |   |          |          |         |   |          |          |          |   |          |          |          |   |          |          |          |   |          |          |          |   |          |          |          |   |          |          |          |   |          |          |          |   |          |          |          |    |          |          |          |    |          |          |          |   |          |          |          |   |          |          |          |   |          |          |          |   |          |          |          |   |          |          |         |   |          |          |         |   |          |          |         |   |          |          |         |
| C                                                                                                                                                       | 0.00002                                                                                                                                                                                                                                                                                                                                                                                                                                                                                                                                                                                                                                                                                                                                                                                                                                                                                                                                                                                                                                                                                                                                                                                                                                                                                                                                                                                                                                                                                                                                                                                                                                                                                                                                                                                                                                                                                                                                                                                                                                                                | 0.89855  | 1.77236  |          |          |   |          |          |          |   |          |          |          |   |          |         |          |   |          |         |          |   |          |          |          |   |          |          |          |   |          |         |          |   |          |          |         |   |          |          |         |   |          |          |         |   |          |          |         |   |          |         |         |   |          |          |         |   |          |          |         |   |          |          |          |   |          |          |         |   |          |          |          |    |          |          |          |    |          |          |         |   |          |          |          |   |          |          |          |   |          |          |          |   |          |          |          |   |          |         |          |   |          |          |          |                                                                                                                                                         |                                                                                                                                                                                                                                                                                                                                                                                                                                                                                                                                                                                                                                                                                                                                                                                                                                                                                                                                                                                                                                                                                                                                                                                                                                                                                                                                                                                                                                                                                                                                                                                                                                                                                                                                                                                                                                                                                                                                   |         |          |          |          |         |          |                                                                                                                                                        |                                                                                                                                                                                                                                                                                                                                                                                                                                                                                                                                                                                                                                                                                                                                                                                                                                                                                                                                                                                                                                                                                                                                                                                                                                                                                                                                                                                                                                                                                                                                                                                                                                                                                                                                                                                                                                                                                                                                                                                                                                                                             |   |          |          |          |   |          |          |          |   |          |          |          |   |          |          |          |   |          |          |          |   |          |          |          |   |          |          |          |   |          |          |          |   |          |          |         |   |          |          |         |   |          |          |          |   |          |          |          |   |          |          |          |   |          |          |          |   |          |          |          |   |          |          |          |   |          |          |          |   |          |          |          |    |          |          |          |    |          |          |          |   |          |          |          |   |          |          |          |   |          |          |          |   |          |          |          |   |          |          |         |   |          |          |         |   |          |          |         |   |          |          |         |
| C                                                                                                                                                       | -0.00322                                                                                                                                                                                                                                                                                                                                                                                                                                                                                                                                                                                                                                                                                                                                                                                                                                                                                                                                                                                                                                                                                                                                                                                                                                                                                                                                                                                                                                                                                                                                                                                                                                                                                                                                                                                                                                                                                                                                                                                                                                                               | -1.41451 | 1.25608  |          |          |   |          |          |          |   |          |          |          |   |          |         |          |   |          |         |          |   |          |          |          |   |          |          |          |   |          |         |          |   |          |          |         |   |          |          |         |   |          |          |         |   |          |          |         |   |          |         |         |   |          |          |         |   |          |          |         |   |          |          |          |   |          |          |         |   |          |          |          |    |          |          |          |    |          |          |         |   |          |          |          |   |          |          |          |   |          |          |          |   |          |          |          |   |          |         |          |   |          |          |          |                                                                                                                                                         |                                                                                                                                                                                                                                                                                                                                                                                                                                                                                                                                                                                                                                                                                                                                                                                                                                                                                                                                                                                                                                                                                                                                                                                                                                                                                                                                                                                                                                                                                                                                                                                                                                                                                                                                                                                                                                                                                                                                   |         |          |          |          |         |          |                                                                                                                                                        |                                                                                                                                                                                                                                                                                                                                                                                                                                                                                                                                                                                                                                                                                                                                                                                                                                                                                                                                                                                                                                                                                                                                                                                                                                                                                                                                                                                                                                                                                                                                                                                                                                                                                                                                                                                                                                                                                                                                                                                                                                                                             |   |          |          |          |   |          |          |          |   |          |          |          |   |          |          |          |   |          |          |          |   |          |          |          |   |          |          |          |   |          |          |          |   |          |          |         |   |          |          |         |   |          |          |          |   |          |          |          |   |          |          |          |   |          |          |          |   |          |          |          |   |          |          |          |   |          |          |          |   |          |          |          |    |          |          |          |    |          |          |          |   |          |          |          |   |          |          |          |   |          |          |          |   |          |          |          |   |          |          |         |   |          |          |         |   |          |          |         |   |          |          |         |
| C                                                                                                                                                       | -0.00311                                                                                                                                                                                                                                                                                                                                                                                                                                                                                                                                                                                                                                                                                                                                                                                                                                                                                                                                                                                                                                                                                                                                                                                                                                                                                                                                                                                                                                                                                                                                                                                                                                                                                                                                                                                                                                                                                                                                                                                                                                                               | -1.75665 | 2.59370  |          |          |   |          |          |          |   |          |          |          |   |          |         |          |   |          |         |          |   |          |          |          |   |          |          |          |   |          |         |          |   |          |          |         |   |          |          |         |   |          |          |         |   |          |          |         |   |          |         |         |   |          |          |         |   |          |          |         |   |          |          |          |   |          |          |         |   |          |          |          |    |          |          |          |    |          |          |         |   |          |          |          |   |          |          |          |   |          |          |          |   |          |          |          |   |          |         |          |   |          |          |          |                                                                                                                                                         |                                                                                                                                                                                                                                                                                                                                                                                                                                                                                                                                                                                                                                                                                                                                                                                                                                                                                                                                                                                                                                                                                                                                                                                                                                                                                                                                                                                                                                                                                                                                                                                                                                                                                                                                                                                                                                                                                                                                   |         |          |          |          |         |          |                                                                                                                                                        |                                                                                                                                                                                                                                                                                                                                                                                                                                                                                                                                                                                                                                                                                                                                                                                                                                                                                                                                                                                                                                                                                                                                                                                                                                                                                                                                                                                                                                                                                                                                                                                                                                                                                                                                                                                                                                                                                                                                                                                                                                                                             |   |          |          |          |   |          |          |          |   |          |          |          |   |          |          |          |   |          |          |          |   |          |          |          |   |          |          |          |   |          |          |          |   |          |          |         |   |          |          |         |   |          |          |          |   |          |          |          |   |          |          |          |   |          |          |          |   |          |          |          |   |          |          |          |   |          |          |          |   |          |          |          |    |          |          |          |    |          |          |          |   |          |          |          |   |          |          |          |   |          |          |          |   |          |          |          |   |          |          |         |   |          |          |         |   |          |          |         |   |          |          |         |
| C                                                                                                                                                       | 0.00030                                                                                                                                                                                                                                                                                                                                                                                                                                                                                                                                                                                                                                                                                                                                                                                                                                                                                                                                                                                                                                                                                                                                                                                                                                                                                                                                                                                                                                                                                                                                                                                                                                                                                                                                                                                                                                                                                                                                                                                                                                                                | 0.56220  | 3.12145  |          |          |   |          |          |          |   |          |          |          |   |          |         |          |   |          |         |          |   |          |          |          |   |          |          |          |   |          |         |          |   |          |          |         |   |          |          |         |   |          |          |         |   |          |          |         |   |          |         |         |   |          |          |         |   |          |          |         |   |          |          |          |   |          |          |         |   |          |          |          |    |          |          |          |    |          |          |         |   |          |          |          |   |          |          |          |   |          |          |          |   |          |          |          |   |          |         |          |   |          |          |          |                                                                                                                                                         |                                                                                                                                                                                                                                                                                                                                                                                                                                                                                                                                                                                                                                                                                                                                                                                                                                                                                                                                                                                                                                                                                                                                                                                                                                                                                                                                                                                                                                                                                                                                                                                                                                                                                                                                                                                                                                                                                                                                   |         |          |          |          |         |          |                                                                                                                                                        |                                                                                                                                                                                                                                                                                                                                                                                                                                                                                                                                                                                                                                                                                                                                                                                                                                                                                                                                                                                                                                                                                                                                                                                                                                                                                                                                                                                                                                                                                                                                                                                                                                                                                                                                                                                                                                                                                                                                                                                                                                                                             |   |          |          |          |   |          |          |          |   |          |          |          |   |          |          |          |   |          |          |          |   |          |          |          |   |          |          |          |   |          |          |          |   |          |          |         |   |          |          |         |   |          |          |          |   |          |          |          |   |          |          |          |   |          |          |          |   |          |          |          |   |          |          |          |   |          |          |          |   |          |          |          |    |          |          |          |    |          |          |          |   |          |          |          |   |          |          |          |   |          |          |          |   |          |          |          |   |          |          |         |   |          |          |         |   |          |          |         |   |          |          |         |
| H                                                                                                                                                       | -0.00477                                                                                                                                                                                                                                                                                                                                                                                                                                                                                                                                                                                                                                                                                                                                                                                                                                                                                                                                                                                                                                                                                                                                                                                                                                                                                                                                                                                                                                                                                                                                                                                                                                                                                                                                                                                                                                                                                                                                                                                                                                                               | -2.22758 | 0.56264  |          |          |   |          |          |          |   |          |          |          |   |          |         |          |   |          |         |          |   |          |          |          |   |          |          |          |   |          |         |          |   |          |          |         |   |          |          |         |   |          |          |         |   |          |          |         |   |          |         |         |   |          |          |         |   |          |          |         |   |          |          |          |   |          |          |         |   |          |          |          |    |          |          |          |    |          |          |         |   |          |          |          |   |          |          |          |   |          |          |          |   |          |          |          |   |          |         |          |   |          |          |          |                                                                                                                                                         |                                                                                                                                                                                                                                                                                                                                                                                                                                                                                                                                                                                                                                                                                                                                                                                                                                                                                                                                                                                                                                                                                                                                                                                                                                                                                                                                                                                                                                                                                                                                                                                                                                                                                                                                                                                                                                                                                                                                   |         |          |          |          |         |          |                                                                                                                                                        |                                                                                                                                                                                                                                                                                                                                                                                                                                                                                                                                                                                                                                                                                                                                                                                                                                                                                                                                                                                                                                                                                                                                                                                                                                                                                                                                                                                                                                                                                                                                                                                                                                                                                                                                                                                                                                                                                                                                                                                                                                                                             |   |          |          |          |   |          |          |          |   |          |          |          |   |          |          |          |   |          |          |          |   |          |          |          |   |          |          |          |   |          |          |          |   |          |          |         |   |          |          |         |   |          |          |          |   |          |          |          |   |          |          |          |   |          |          |          |   |          |          |          |   |          |          |          |   |          |          |          |   |          |          |          |    |          |          |          |    |          |          |          |   |          |          |          |   |          |          |          |   |          |          |          |   |          |          |          |   |          |          |         |   |          |          |         |   |          |          |         |   |          |          |         |
| H                                                                                                                                                       | -0.00453                                                                                                                                                                                                                                                                                                                                                                                                                                                                                                                                                                                                                                                                                                                                                                                                                                                                                                                                                                                                                                                                                                                                                                                                                                                                                                                                                                                                                                                                                                                                                                                                                                                                                                                                                                                                                                                                                                                                                                                                                                                               | -2.79801 | 2.87924  |          |          |   |          |          |          |   |          |          |          |   |          |         |          |   |          |         |          |   |          |          |          |   |          |          |          |   |          |         |          |   |          |          |         |   |          |          |         |   |          |          |         |   |          |          |         |   |          |         |         |   |          |          |         |   |          |          |         |   |          |          |          |   |          |          |         |   |          |          |          |    |          |          |          |    |          |          |         |   |          |          |          |   |          |          |          |   |          |          |          |   |          |          |          |   |          |         |          |   |          |          |          |                                                                                                                                                         |                                                                                                                                                                                                                                                                                                                                                                                                                                                                                                                                                                                                                                                                                                                                                                                                                                                                                                                                                                                                                                                                                                                                                                                                                                                                                                                                                                                                                                                                                                                                                                                                                                                                                                                                                                                                                                                                                                                                   |         |          |          |          |         |          |                                                                                                                                                        |                                                                                                                                                                                                                                                                                                                                                                                                                                                                                                                                                                                                                                                                                                                                                                                                                                                                                                                                                                                                                                                                                                                                                                                                                                                                                                                                                                                                                                                                                                                                                                                                                                                                                                                                                                                                                                                                                                                                                                                                                                                                             |   |          |          |          |   |          |          |          |   |          |          |          |   |          |          |          |   |          |          |          |   |          |          |          |   |          |          |          |   |          |          |          |   |          |          |         |   |          |          |         |   |          |          |          |   |          |          |          |   |          |          |          |   |          |          |          |   |          |          |          |   |          |          |          |   |          |          |          |   |          |          |          |    |          |          |          |    |          |          |          |   |          |          |          |   |          |          |          |   |          |          |          |   |          |          |          |   |          |          |         |   |          |          |         |   |          |          |         |   |          |          |         |
| H                                                                                                                                                       | 0.00161                                                                                                                                                                                                                                                                                                                                                                                                                                                                                                                                                                                                                                                                                                                                                                                                                                                                                                                                                                                                                                                                                                                                                                                                                                                                                                                                                                                                                                                                                                                                                                                                                                                                                                                                                                                                                                                                                                                                                                                                                                                                | 1.33838  | 3.87181  |          |          |   |          |          |          |   |          |          |          |   |          |         |          |   |          |         |          |   |          |          |          |   |          |          |          |   |          |         |          |   |          |          |         |   |          |          |         |   |          |          |         |   |          |          |         |   |          |         |         |   |          |          |         |   |          |          |         |   |          |          |          |   |          |          |         |   |          |          |          |    |          |          |          |    |          |          |         |   |          |          |          |   |          |          |          |   |          |          |          |   |          |          |          |   |          |         |          |   |          |          |          |                                                                                                                                                         |                                                                                                                                                                                                                                                                                                                                                                                                                                                                                                                                                                                                                                                                                                                                                                                                                                                                                                                                                                                                                                                                                                                                                                                                                                                                                                                                                                                                                                                                                                                                                                                                                                                                                                                                                                                                                                                                                                                                   |         |          |          |          |         |          |                                                                                                                                                        |                                                                                                                                                                                                                                                                                                                                                                                                                                                                                                                                                                                                                                                                                                                                                                                                                                                                                                                                                                                                                                                                                                                                                                                                                                                                                                                                                                                                                                                                                                                                                                                                                                                                                                                                                                                                                                                                                                                                                                                                                                                                             |   |          |          |          |   |          |          |          |   |          |          |          |   |          |          |          |   |          |          |          |   |          |          |          |   |          |          |          |   |          |          |          |   |          |          |         |   |          |          |         |   |          |          |          |   |          |          |          |   |          |          |          |   |          |          |          |   |          |          |          |   |          |          |          |   |          |          |          |   |          |          |          |    |          |          |          |    |          |          |          |   |          |          |          |   |          |          |          |   |          |          |          |   |          |          |          |   |          |          |         |   |          |          |         |   |          |          |         |   |          |          |         |
| H                                                                                                                                                       | 0.00220                                                                                                                                                                                                                                                                                                                                                                                                                                                                                                                                                                                                                                                                                                                                                                                                                                                                                                                                                                                                                                                                                                                                                                                                                                                                                                                                                                                                                                                                                                                                                                                                                                                                                                                                                                                                                                                                                                                                                                                                                                                                | 2.79807  | -2.87926 |          |          |   |          |          |          |   |          |          |          |   |          |         |          |   |          |         |          |   |          |          |          |   |          |          |          |   |          |         |          |   |          |          |         |   |          |          |         |   |          |          |         |   |          |          |         |   |          |         |         |   |          |          |         |   |          |          |         |   |          |          |          |   |          |          |         |   |          |          |          |    |          |          |          |    |          |          |         |   |          |          |          |   |          |          |          |   |          |          |          |   |          |          |          |   |          |         |          |   |          |          |          |                                                                                                                                                         |                                                                                                                                                                                                                                                                                                                                                                                                                                                                                                                                                                                                                                                                                                                                                                                                                                                                                                                                                                                                                                                                                                                                                                                                                                                                                                                                                                                                                                                                                                                                                                                                                                                                                                                                                                                                                                                                                                                                   |         |          |          |          |         |          |                                                                                                                                                        |                                                                                                                                                                                                                                                                                                                                                                                                                                                                                                                                                                                                                                                                                                                                                                                                                                                                                                                                                                                                                                                                                                                                                                                                                                                                                                                                                                                                                                                                                                                                                                                                                                                                                                                                                                                                                                                                                                                                                                                                                                                                             |   |          |          |          |   |          |          |          |   |          |          |          |   |          |          |          |   |          |          |          |   |          |          |          |   |          |          |          |   |          |          |          |   |          |          |         |   |          |          |         |   |          |          |          |   |          |          |          |   |          |          |          |   |          |          |          |   |          |          |          |   |          |          |          |   |          |          |          |   |          |          |          |    |          |          |          |    |          |          |          |   |          |          |          |   |          |          |          |   |          |          |          |   |          |          |          |   |          |          |         |   |          |          |         |   |          |          |         |   |          |          |         |
| Br                                                                                                                                                      | -0.00475                                                                                                                                                                                                                                                                                                                                                                                                                                                                                                                                                                                                                                                                                                                                                                                                                                                                                                                                                                                                                                                                                                                                                                                                                                                                                                                                                                                                                                                                                                                                                                                                                                                                                                                                                                                                                                                                                                                                                                                                                                                               | -2.83290 | -1.60973 |          |          |   |          |          |          |   |          |          |          |   |          |         |          |   |          |         |          |   |          |          |          |   |          |          |          |   |          |         |          |   |          |          |         |   |          |          |         |   |          |          |         |   |          |          |         |   |          |         |         |   |          |          |         |   |          |          |         |   |          |          |          |   |          |          |         |   |          |          |          |    |          |          |          |    |          |          |         |   |          |          |          |   |          |          |          |   |          |          |          |   |          |          |          |   |          |         |          |   |          |          |          |                                                                                                                                                         |                                                                                                                                                                                                                                                                                                                                                                                                                                                                                                                                                                                                                                                                                                                                                                                                                                                                                                                                                                                                                                                                                                                                                                                                                                                                                                                                                                                                                                                                                                                                                                                                                                                                                                                                                                                                                                                                                                                                   |         |          |          |          |         |          |                                                                                                                                                        |                                                                                                                                                                                                                                                                                                                                                                                                                                                                                                                                                                                                                                                                                                                                                                                                                                                                                                                                                                                                                                                                                                                                                                                                                                                                                                                                                                                                                                                                                                                                                                                                                                                                                                                                                                                                                                                                                                                                                                                                                                                                             |   |          |          |          |   |          |          |          |   |          |          |          |   |          |          |          |   |          |          |          |   |          |          |          |   |          |          |          |   |          |          |          |   |          |          |         |   |          |          |         |   |          |          |          |   |          |          |          |   |          |          |          |   |          |          |          |   |          |          |          |   |          |          |          |   |          |          |          |   |          |          |          |    |          |          |          |    |          |          |          |   |          |          |          |   |          |          |          |   |          |          |          |   |          |          |          |   |          |          |         |   |          |          |         |   |          |          |         |   |          |          |         |
| Br                                                                                                                                                      | 0.00146                                                                                                                                                                                                                                                                                                                                                                                                                                                                                                                                                                                                                                                                                                                                                                                                                                                                                                                                                                                                                                                                                                                                                                                                                                                                                                                                                                                                                                                                                                                                                                                                                                                                                                                                                                                                                                                                                                                                                                                                                                                                | 2.83295  | 1.60969  |          |          |   |          |          |          |   |          |          |          |   |          |         |          |   |          |         |          |   |          |          |          |   |          |          |          |   |          |         |          |   |          |          |         |   |          |          |         |   |          |          |         |   |          |          |         |   |          |         |         |   |          |          |         |   |          |          |         |   |          |          |          |   |          |          |         |   |          |          |          |    |          |          |          |    |          |          |         |   |          |          |          |   |          |          |          |   |          |          |          |   |          |          |          |   |          |         |          |   |          |          |          |                                                                                                                                                         |                                                                                                                                                                                                                                                                                                                                                                                                                                                                                                                                                                                                                                                                                                                                                                                                                                                                                                                                                                                                                                                                                                                                                                                                                                                                                                                                                                                                                                                                                                                                                                                                                                                                                                                                                                                                                                                                                                                                   |         |          |          |          |         |          |                                                                                                                                                        |                                                                                                                                                                                                                                                                                                                                                                                                                                                                                                                                                                                                                                                                                                                                                                                                                                                                                                                                                                                                                                                                                                                                                                                                                                                                                                                                                                                                                                                                                                                                                                                                                                                                                                                                                                                                                                                                                                                                                                                                                                                                             |   |          |          |          |   |          |          |          |   |          |          |          |   |          |          |          |   |          |          |          |   |          |          |          |   |          |          |          |   |          |          |          |   |          |          |         |   |          |          |         |   |          |          |          |   |          |          |          |   |          |          |          |   |          |          |          |   |          |          |          |   |          |          |          |   |          |          |          |   |          |          |          |    |          |          |          |    |          |          |          |   |          |          |          |   |          |          |          |   |          |          |          |   |          |          |          |   |          |          |         |   |          |          |         |   |          |          |         |   |          |          |         |
| C                                                                                                                                                       | -0.00120                                                                                                                                                                                                                                                                                                                                                                                                                                                                                                                                                                                                                                                                                                                                                                                                                                                                                                                                                                                                                                                                                                                                                                                                                                                                                                                                                                                                                                                                                                                                                                                                                                                                                                                                                                                                                                                                                                                                                                                                                                                               | 1.01896  | -5.01766 |          |          |   |          |          |          |   |          |          |          |   |          |         |          |   |          |         |          |   |          |          |          |   |          |          |          |   |          |         |          |   |          |          |         |   |          |          |         |   |          |          |         |   |          |          |         |   |          |         |         |   |          |          |         |   |          |          |         |   |          |          |          |   |          |          |         |   |          |          |          |    |          |          |          |    |          |          |         |   |          |          |          |   |          |          |          |   |          |          |          |   |          |          |          |   |          |         |          |   |          |          |          |                                                                                                                                                         |                                                                                                                                                                                                                                                                                                                                                                                                                                                                                                                                                                                                                                                                                                                                                                                                                                                                                                                                                                                                                                                                                                                                                                                                                                                                                                                                                                                                                                                                                                                                                                                                                                                                                                                                                                                                                                                                                                                                   |         |          |          |          |         |          |                                                                                                                                                        |                                                                                                                                                                                                                                                                                                                                                                                                                                                                                                                                                                                                                                                                                                                                                                                                                                                                                                                                                                                                                                                                                                                                                                                                                                                                                                                                                                                                                                                                                                                                                                                                                                                                                                                                                                                                                                                                                                                                                                                                                                                                             |   |          |          |          |   |          |          |          |   |          |          |          |   |          |          |          |   |          |          |          |   |          |          |          |   |          |          |          |   |          |          |          |   |          |          |         |   |          |          |         |   |          |          |          |   |          |          |          |   |          |          |          |   |          |          |          |   |          |          |          |   |          |          |          |   |          |          |          |   |          |          |          |    |          |          |          |    |          |          |          |   |          |          |          |   |          |          |          |   |          |          |          |   |          |          |          |   |          |          |         |   |          |          |         |   |          |          |         |   |          |          |         |
| O                                                                                                                                                       | -0.00271                                                                                                                                                                                                                                                                                                                                                                                                                                                                                                                                                                                                                                                                                                                                                                                                                                                                                                                                                                                                                                                                                                                                                                                                                                                                                                                                                                                                                                                                                                                                                                                                                                                                                                                                                                                                                                                                                                                                                                                                                                                               | 0.16561  | -5.86983 |          |          |   |          |          |          |   |          |          |          |   |          |         |          |   |          |         |          |   |          |          |          |   |          |          |          |   |          |         |          |   |          |          |         |   |          |          |         |   |          |          |         |   |          |          |         |   |          |         |         |   |          |          |         |   |          |          |         |   |          |          |          |   |          |          |         |   |          |          |          |    |          |          |          |    |          |          |         |   |          |          |          |   |          |          |          |   |          |          |          |   |          |          |          |   |          |         |          |   |          |          |          |                                                                                                                                                         |                                                                                                                                                                                                                                                                                                                                                                                                                                                                                                                                                                                                                                                                                                                                                                                                                                                                                                                                                                                                                                                                                                                                                                                                                                                                                                                                                                                                                                                                                                                                                                                                                                                                                                                                                                                                                                                                                                                                   |         |          |          |          |         |          |                                                                                                                                                        |                                                                                                                                                                                                                                                                                                                                                                                                                                                                                                                                                                                                                                                                                                                                                                                                                                                                                                                                                                                                                                                                                                                                                                                                                                                                                                                                                                                                                                                                                                                                                                                                                                                                                                                                                                                                                                                                                                                                                                                                                                                                             |   |          |          |          |   |          |          |          |   |          |          |          |   |          |          |          |   |          |          |          |   |          |          |          |   |          |          |          |   |          |          |          |   |          |          |         |   |          |          |         |   |          |          |          |   |          |          |          |   |          |          |          |   |          |          |          |   |          |          |          |   |          |          |          |   |          |          |          |   |          |          |          |    |          |          |          |    |          |          |          |   |          |          |          |   |          |          |          |   |          |          |          |   |          |          |          |   |          |          |         |   |          |          |         |   |          |          |         |   |          |          |         |
| O                                                                                                                                                       | 0.00062                                                                                                                                                                                                                                                                                                                                                                                                                                                                                                                                                                                                                                                                                                                                                                                                                                                                                                                                                                                                                                                                                                                                                                                                                                                                                                                                                                                                                                                                                                                                                                                                                                                                                                                                                                                                                                                                                                                                                                                                                                                                | 2.34130  | -5.30938 |          |          |   |          |          |          |   |          |          |          |   |          |         |          |   |          |         |          |   |          |          |          |   |          |          |          |   |          |         |          |   |          |          |         |   |          |          |         |   |          |          |         |   |          |          |         |   |          |         |         |   |          |          |         |   |          |          |         |   |          |          |          |   |          |          |         |   |          |          |          |    |          |          |          |    |          |          |         |   |          |          |          |   |          |          |          |   |          |          |          |   |          |          |          |   |          |         |          |   |          |          |          |                                                                                                                                                         |                                                                                                                                                                                                                                                                                                                                                                                                                                                                                                                                                                                                                                                                                                                                                                                                                                                                                                                                                                                                                                                                                                                                                                                                                                                                                                                                                                                                                                                                                                                                                                                                                                                                                                                                                                                                                                                                                                                                   |         |          |          |          |         |          |                                                                                                                                                        |                                                                                                                                                                                                                                                                                                                                                                                                                                                                                                                                                                                                                                                                                                                                                                                                                                                                                                                                                                                                                                                                                                                                                                                                                                                                                                                                                                                                                                                                                                                                                                                                                                                                                                                                                                                                                                                                                                                                                                                                                                                                             |   |          |          |          |   |          |          |          |   |          |          |          |   |          |          |          |   |          |          |          |   |          |          |          |   |          |          |          |   |          |          |          |   |          |          |         |   |          |          |         |   |          |          |          |   |          |          |          |   |          |          |          |   |          |          |          |   |          |          |          |   |          |          |          |   |          |          |          |   |          |          |          |    |          |          |          |    |          |          |          |   |          |          |          |   |          |          |          |   |          |          |          |   |          |          |          |   |          |          |         |   |          |          |         |   |          |          |         |   |          |          |         |
| H                                                                                                                                                       | 0.00043                                                                                                                                                                                                                                                                                                                                                                                                                                                                                                                                                                                                                                                                                                                                                                                                                                                                                                                                                                                                                                                                                                                                                                                                                                                                                                                                                                                                                                                                                                                                                                                                                                                                                                                                                                                                                                                                                                                                                                                                                                                                | 2.41951  | -6.27342 |          |          |   |          |          |          |   |          |          |          |   |          |         |          |   |          |         |          |   |          |          |          |   |          |          |          |   |          |         |          |   |          |          |         |   |          |          |         |   |          |          |         |   |          |          |         |   |          |         |         |   |          |          |         |   |          |          |         |   |          |          |          |   |          |          |         |   |          |          |          |    |          |          |          |    |          |          |         |   |          |          |          |   |          |          |          |   |          |          |          |   |          |          |          |   |          |         |          |   |          |          |          |                                                                                                                                                         |                                                                                                                                                                                                                                                                                                                                                                                                                                                                                                                                                                                                                                                                                                                                                                                                                                                                                                                                                                                                                                                                                                                                                                                                                                                                                                                                                                                                                                                                                                                                                                                                                                                                                                                                                                                                                                                                                                                                   |         |          |          |          |         |          |                                                                                                                                                        |                                                                                                                                                                                                                                                                                                                                                                                                                                                                                                                                                                                                                                                                                                                                                                                                                                                                                                                                                                                                                                                                                                                                                                                                                                                                                                                                                                                                                                                                                                                                                                                                                                                                                                                                                                                                                                                                                                                                                                                                                                                                             |   |          |          |          |   |          |          |          |   |          |          |          |   |          |          |          |   |          |          |          |   |          |          |          |   |          |          |          |   |          |          |          |   |          |          |         |   |          |          |         |   |          |          |          |   |          |          |          |   |          |          |          |   |          |          |          |   |          |          |          |   |          |          |          |   |          |          |          |   |          |          |          |    |          |          |          |    |          |          |          |   |          |          |          |   |          |          |          |   |          |          |          |   |          |          |          |   |          |          |         |   |          |          |         |   |          |          |         |   |          |          |         |
| C                                                                                                                                                       | -0.00062                                                                                                                                                                                                                                                                                                                                                                                                                                                                                                                                                                                                                                                                                                                                                                                                                                                                                                                                                                                                                                                                                                                                                                                                                                                                                                                                                                                                                                                                                                                                                                                                                                                                                                                                                                                                                                                                                                                                                                                                                                                               | -1.01889 | 5.01763  |          |          |   |          |          |          |   |          |          |          |   |          |         |          |   |          |         |          |   |          |          |          |   |          |          |          |   |          |         |          |   |          |          |         |   |          |          |         |   |          |          |         |   |          |          |         |   |          |         |         |   |          |          |         |   |          |          |         |   |          |          |          |   |          |          |         |   |          |          |          |    |          |          |          |    |          |          |         |   |          |          |          |   |          |          |          |   |          |          |          |   |          |          |          |   |          |         |          |   |          |          |          |                                                                                                                                                         |                                                                                                                                                                                                                                                                                                                                                                                                                                                                                                                                                                                                                                                                                                                                                                                                                                                                                                                                                                                                                                                                                                                                                                                                                                                                                                                                                                                                                                                                                                                                                                                                                                                                                                                                                                                                                                                                                                                                   |         |          |          |          |         |          |                                                                                                                                                        |                                                                                                                                                                                                                                                                                                                                                                                                                                                                                                                                                                                                                                                                                                                                                                                                                                                                                                                                                                                                                                                                                                                                                                                                                                                                                                                                                                                                                                                                                                                                                                                                                                                                                                                                                                                                                                                                                                                                                                                                                                                                             |   |          |          |          |   |          |          |          |   |          |          |          |   |          |          |          |   |          |          |          |   |          |          |          |   |          |          |          |   |          |          |          |   |          |          |         |   |          |          |         |   |          |          |          |   |          |          |          |   |          |          |          |   |          |          |          |   |          |          |          |   |          |          |          |   |          |          |          |   |          |          |          |    |          |          |          |    |          |          |          |   |          |          |          |   |          |          |          |   |          |          |          |   |          |          |          |   |          |          |         |   |          |          |         |   |          |          |         |   |          |          |         |
| O                                                                                                                                                       | 0.00087                                                                                                                                                                                                                                                                                                                                                                                                                                                                                                                                                                                                                                                                                                                                                                                                                                                                                                                                                                                                                                                                                                                                                                                                                                                                                                                                                                                                                                                                                                                                                                                                                                                                                                                                                                                                                                                                                                                                                                                                                                                                | -0.16553 | 5.86980  |          |          |   |          |          |          |   |          |          |          |   |          |         |          |   |          |         |          |   |          |          |          |   |          |          |          |   |          |         |          |   |          |          |         |   |          |          |         |   |          |          |         |   |          |          |         |   |          |         |         |   |          |          |         |   |          |          |         |   |          |          |          |   |          |          |         |   |          |          |          |    |          |          |          |    |          |          |         |   |          |          |          |   |          |          |          |   |          |          |          |   |          |          |          |   |          |         |          |   |          |          |          |                                                                                                                                                         |                                                                                                                                                                                                                                                                                                                                                                                                                                                                                                                                                                                                                                                                                                                                                                                                                                                                                                                                                                                                                                                                                                                                                                                                                                                                                                                                                                                                                                                                                                                                                                                                                                                                                                                                                                                                                                                                                                                                   |         |          |          |          |         |          |                                                                                                                                                        |                                                                                                                                                                                                                                                                                                                                                                                                                                                                                                                                                                                                                                                                                                                                                                                                                                                                                                                                                                                                                                                                                                                                                                                                                                                                                                                                                                                                                                                                                                                                                                                                                                                                                                                                                                                                                                                                                                                                                                                                                                                                             |   |          |          |          |   |          |          |          |   |          |          |          |   |          |          |          |   |          |          |          |   |          |          |          |   |          |          |          |   |          |          |          |   |          |          |         |   |          |          |         |   |          |          |          |   |          |          |          |   |          |          |          |   |          |          |          |   |          |          |          |   |          |          |          |   |          |          |          |   |          |          |          |    |          |          |          |    |          |          |          |   |          |          |          |   |          |          |          |   |          |          |          |   |          |          |          |   |          |          |         |   |          |          |         |   |          |          |         |   |          |          |         |
| O                                                                                                                                                       | -0.00202                                                                                                                                                                                                                                                                                                                                                                                                                                                                                                                                                                                                                                                                                                                                                                                                                                                                                                                                                                                                                                                                                                                                                                                                                                                                                                                                                                                                                                                                                                                                                                                                                                                                                                                                                                                                                                                                                                                                                                                                                                                               | -2.34123 | 5.30936  |          |          |   |          |          |          |   |          |          |          |   |          |         |          |   |          |         |          |   |          |          |          |   |          |          |          |   |          |         |          |   |          |          |         |   |          |          |         |   |          |          |         |   |          |          |         |   |          |         |         |   |          |          |         |   |          |          |         |   |          |          |          |   |          |          |         |   |          |          |          |    |          |          |          |    |          |          |         |   |          |          |          |   |          |          |          |   |          |          |          |   |          |          |          |   |          |         |          |   |          |          |          |                                                                                                                                                         |                                                                                                                                                                                                                                                                                                                                                                                                                                                                                                                                                                                                                                                                                                                                                                                                                                                                                                                                                                                                                                                                                                                                                                                                                                                                                                                                                                                                                                                                                                                                                                                                                                                                                                                                                                                                                                                                                                                                   |         |          |          |          |         |          |                                                                                                                                                        |                                                                                                                                                                                                                                                                                                                                                                                                                                                                                                                                                                                                                                                                                                                                                                                                                                                                                                                                                                                                                                                                                                                                                                                                                                                                                                                                                                                                                                                                                                                                                                                                                                                                                                                                                                                                                                                                                                                                                                                                                                                                             |   |          |          |          |   |          |          |          |   |          |          |          |   |          |          |          |   |          |          |          |   |          |          |          |   |          |          |          |   |          |          |          |   |          |          |         |   |          |          |         |   |          |          |          |   |          |          |          |   |          |          |          |   |          |          |          |   |          |          |          |   |          |          |          |   |          |          |          |   |          |          |          |    |          |          |          |    |          |          |          |   |          |          |          |   |          |          |          |   |          |          |          |   |          |          |          |   |          |          |         |   |          |          |         |   |          |          |         |   |          |          |         |
| H                                                                                                                                                       | -0.00159                                                                                                                                                                                                                                                                                                                                                                                                                                                                                                                                                                                                                                                                                                                                                                                                                                                                                                                                                                                                                                                                                                                                                                                                                                                                                                                                                                                                                                                                                                                                                                                                                                                                                                                                                                                                                                                                                                                                                                                                                                                               | -2.41943 | 6.27340  |          |          |   |          |          |          |   |          |          |          |   |          |         |          |   |          |         |          |   |          |          |          |   |          |          |          |   |          |         |          |   |          |          |         |   |          |          |         |   |          |          |         |   |          |          |         |   |          |         |         |   |          |          |         |   |          |          |         |   |          |          |          |   |          |          |         |   |          |          |          |    |          |          |          |    |          |          |         |   |          |          |          |   |          |          |          |   |          |          |          |   |          |          |          |   |          |         |          |   |          |          |          |                                                                                                                                                         |                                                                                                                                                                                                                                                                                                                                                                                                                                                                                                                                                                                                                                                                                                                                                                                                                                                                                                                                                                                                                                                                                                                                                                                                                                                                                                                                                                                                                                                                                                                                                                                                                                                                                                                                                                                                                                                                                                                                   |         |          |          |          |         |          |                                                                                                                                                        |                                                                                                                                                                                                                                                                                                                                                                                                                                                                                                                                                                                                                                                                                                                                                                                                                                                                                                                                                                                                                                                                                                                                                                                                                                                                                                                                                                                                                                                                                                                                                                                                                                                                                                                                                                                                                                                                                                                                                                                                                                                                             |   |          |          |          |   |          |          |          |   |          |          |          |   |          |          |          |   |          |          |          |   |          |          |          |   |          |          |          |   |          |          |          |   |          |          |         |   |          |          |         |   |          |          |          |   |          |          |          |   |          |          |          |   |          |          |          |   |          |          |          |   |          |          |          |   |          |          |          |   |          |          |          |    |          |          |          |    |          |          |          |   |          |          |          |   |          |          |          |   |          |          |          |   |          |          |          |   |          |          |         |   |          |          |         |   |          |          |         |   |          |          |         |
|  <p><b>4a</b><br/>-3271.271538<br/>-3272.584469<br/>-3271.851993</p> | <table border="1"> <tbody> <tr><td>C</td><td>0.13906</td><td>-0.05931</td><td>1.12041</td></tr> <tr><td>C</td><td>0.14762</td><td>-0.07230</td><td>3.89996</td></tr> <tr><td>C</td><td>0.38616</td><td>-1.24078</td><td>1.80324</td></tr> <tr><td>C</td><td>-0.11213</td><td>1.11655</td><td>1.82134</td></tr> <tr><td>C</td><td>-0.10990</td><td>1.11246</td><td>3.20653</td></tr> <tr><td>C</td><td>0.39309</td><td>-1.26533</td><td>3.19993</td></tr> <tr><td>H</td><td>0.56612</td><td>-2.16208</td><td>1.26066</td></tr> <tr><td>H</td><td>-0.30298</td><td>2.02125</td><td>3.76361</td></tr> <tr><td>C</td><td>0.12094</td><td>-0.05382</td><td>5.38653</td></tr> <tr><td>C</td><td>-0.03100</td><td>-0.01915</td><td>8.19716</td></tr> <tr><td>C</td><td>1.27210</td><td>-0.06909</td><td>6.17871</td></tr> <tr><td>C</td><td>-1.11065</td><td>-0.00938</td><td>6.04919</td></tr> <tr><td>C</td><td>-1.19432</td><td>0.00750</td><td>7.43556</td></tr> <tr><td>C</td><td>1.20770</td><td>-0.05431</td><td>7.56807</td></tr> <tr><td>H</td><td>-2.01130</td><td>0.00569</td><td>5.44931</td></tr> <tr><td>H</td><td>-2.16233</td><td>0.03917</td><td>7.91784</td></tr> <tr><td>H</td><td>2.11858</td><td>-0.06377</td><td>8.14946</td></tr> <tr><td>H</td><td>-0.08068</td><td>-0.00812</td><td>9.27797</td></tr> <tr><td>C</td><td>0.64839</td><td>-2.55576</td><td>3.93323</td></tr> <tr><td>H</td><td>-0.11597</td><td>-2.73775</td><td>4.69211</td></tr> <tr><td>H</td><td>1.61160</td><td>-2.52875</td><td>4.44896</td></tr> <tr><td>H</td><td>0.65678</td><td>-3.39746</td><td>3.23974</td></tr> <tr><td>C</td><td>-0.31245</td><td>2.28712</td><td>0.87837</td></tr> <tr><td>C</td><td>0.10170</td><td>0.19833</td><td>-0.36608</td></tr> <tr><td>H</td><td>1.11987</td><td>0.27421</td><td>-0.76213</td></tr> <tr><td>H</td><td>-0.40316</td><td>-0.59101</td><td>-0.92581</td></tr> </tbody> </table>                                                                                                                                                   | C        | 0.13906  | -0.05931 | 1.12041  | C | 0.14762  | -0.07230 | 3.89996  | C | 0.38616  | -1.24078 | 1.80324  | C | -0.11213 | 1.11655 | 1.82134  | C | -0.10990 | 1.11246 | 3.20653  | C | 0.39309  | -1.26533 | 3.19993  | H | 0.56612  | -2.16208 | 1.26066  | H | -0.30298 | 2.02125 | 3.76361  | C | 0.12094  | -0.05382 | 5.38653 | C | -0.03100 | -0.01915 | 8.19716 | C | 1.27210  | -0.06909 | 6.17871 | C | -1.11065 | -0.00938 | 6.04919 | C | -1.19432 | 0.00750 | 7.43556 | C | 1.20770  | -0.05431 | 7.56807 | H | -2.01130 | 0.00569  | 5.44931 | H | -2.16233 | 0.03917  | 7.91784  | H | 2.11858  | -0.06377 | 8.14946 | H | -0.08068 | -0.00812 | 9.27797  | C  | 0.64839  | -2.55576 | 3.93323  | H  | -0.11597 | -2.73775 | 4.69211 | H | 1.61160  | -2.52875 | 4.44896  | H | 0.65678  | -3.39746 | 3.23974  | C | -0.31245 | 2.28712  | 0.87837  | C | 0.10170  | 0.19833  | -0.36608 | H | 1.11987  | 0.27421 | -0.76213 | H | -0.40316 | -0.59101 | -0.92581 |  <p><b>4a</b><br/>-3271.24226<br/>-3272.555293<br/>-3271.824944</p> | <table border="1"> <tbody> <tr><td>C</td><td>-0.06752</td><td>-1.36423</td><td>-2.67418</td></tr> <tr><td>C</td><td>0.00066</td><td>-1.12109</td><td>0.16938</td></tr> <tr><td>C</td><td>-0.05895</td><td>-2.48449</td><td>-1.86671</td></tr> <tr><td>C</td><td>-0.04331</td><td>-0.11980</td><td>-2.07270</td></tr> <tr><td>C</td><td>-0.00758</td><td>-0.01314</td><td>-0.69892</td></tr> <tr><td>C</td><td>-0.02925</td><td>-2.41158</td><td>-0.46549</td></tr> <tr><td>H</td><td>-0.08450</td><td>-3.46518</td><td>-2.32666</td></tr> <tr><td>H</td><td>0.00711</td><td>0.97611</td><td>-0.29432</td></tr> <tr><td>C</td><td>0.03620</td><td>-0.87085</td><td>1.65994</td></tr> <tr><td>C</td><td>0.10290</td><td>-0.65959</td><td>4.54854</td></tr> <tr><td>C</td><td>0.06703</td><td>0.37918</td><td>2.35080</td></tr> <tr><td>C</td><td>0.04454</td><td>-1.97134</td><td>2.54694</td></tr> <tr><td>C</td><td>0.07590</td><td>-1.89511</td><td>3.92830</td></tr> <tr><td>C</td><td>0.09855</td><td>0.46546</td><td>3.74392</td></tr> <tr><td>H</td><td>0.02621</td><td>-2.95629</td><td>2.14390</td></tr> <tr><td>H</td><td>0.07892</td><td>-2.81049</td><td>4.50523</td></tr> <tr><td>H</td><td>0.12043</td><td>1.44183</td><td>4.20469</td></tr> <tr><td>H</td><td>0.12742</td><td>-0.55924</td><td>5.62515</td></tr> <tr><td>C</td><td>-0.04127</td><td>-3.78079</td><td>0.19067</td></tr> <tr><td>H</td><td>-0.91596</td><td>-3.93457</td><td>0.82702</td></tr> <tr><td>H</td><td>0.85532</td><td>-3.96995</td><td>0.78573</td></tr> <tr><td>H</td><td>-0.07431</td><td>-4.54958</td><td>-0.58093</td></tr> <tr><td>C</td><td>-0.01550</td><td>0.99347</td><td>-3.10099</td></tr> <tr><td>C</td><td>-0.08752</td><td>-1.23165</td><td>-4.17520</td></tr> <tr><td>H</td><td>0.91200</td><td>-1.41356</td><td>-4.58417</td></tr> <tr><td>H</td><td>-0.76689</td><td>-1.93379</td><td>-4.66186</td></tr> </tbody> </table> | C       | -0.06752 | -1.36423 | -2.67418 | C       | 0.00066  | -1.12109                                                                                                                                               | 0.16938                                                                                                                                                                                                                                                                                                                                                                                                                                                                                                                                                                                                                                                                                                                                                                                                                                                                                                                                                                                                                                                                                                                                                                                                                                                                                                                                                                                                                                                                                                                                                                                                                                                                                                                                                                                                                                                                                                                                                                                                                                                                     | C | -0.05895 | -2.48449 | -1.86671 | C | -0.04331 | -0.11980 | -2.07270 | C | -0.00758 | -0.01314 | -0.69892 | C | -0.02925 | -2.41158 | -0.46549 | H | -0.08450 | -3.46518 | -2.32666 | H | 0.00711  | 0.97611  | -0.29432 | C | 0.03620  | -0.87085 | 1.65994  | C | 0.10290  | -0.65959 | 4.54854  | C | 0.06703  | 0.37918  | 2.35080 | C | 0.04454  | -1.97134 | 2.54694 | C | 0.07590  | -1.89511 | 3.92830  | C | 0.09855  | 0.46546  | 3.74392  | H | 0.02621  | -2.95629 | 2.14390  | H | 0.07892  | -2.81049 | 4.50523  | H | 0.12043  | 1.44183  | 4.20469  | H | 0.12742  | -0.55924 | 5.62515  | C | -0.04127 | -3.78079 | 0.19067  | H | -0.91596 | -3.93457 | 0.82702  | H  | 0.85532  | -3.96995 | 0.78573  | H  | -0.07431 | -4.54958 | -0.58093 | C | -0.01550 | 0.99347  | -3.10099 | C | -0.08752 | -1.23165 | -4.17520 | H | 0.91200  | -1.41356 | -4.58417 | H | -0.76689 | -1.93379 | -4.66186 |   |          |          |         |   |          |          |         |   |          |          |         |   |          |          |         |
| C                                                                                                                                                       | 0.13906                                                                                                                                                                                                                                                                                                                                                                                                                                                                                                                                                                                                                                                                                                                                                                                                                                                                                                                                                                                                                                                                                                                                                                                                                                                                                                                                                                                                                                                                                                                                                                                                                                                                                                                                                                                                                                                                                                                                                                                                                                                                | -0.05931 | 1.12041  |          |          |   |          |          |          |   |          |          |          |   |          |         |          |   |          |         |          |   |          |          |          |   |          |          |          |   |          |         |          |   |          |          |         |   |          |          |         |   |          |          |         |   |          |          |         |   |          |         |         |   |          |          |         |   |          |          |         |   |          |          |          |   |          |          |         |   |          |          |          |    |          |          |          |    |          |          |         |   |          |          |          |   |          |          |          |   |          |          |          |   |          |          |          |   |          |         |          |   |          |          |          |                                                                                                                                                         |                                                                                                                                                                                                                                                                                                                                                                                                                                                                                                                                                                                                                                                                                                                                                                                                                                                                                                                                                                                                                                                                                                                                                                                                                                                                                                                                                                                                                                                                                                                                                                                                                                                                                                                                                                                                                                                                                                                                   |         |          |          |          |         |          |                                                                                                                                                        |                                                                                                                                                                                                                                                                                                                                                                                                                                                                                                                                                                                                                                                                                                                                                                                                                                                                                                                                                                                                                                                                                                                                                                                                                                                                                                                                                                                                                                                                                                                                                                                                                                                                                                                                                                                                                                                                                                                                                                                                                                                                             |   |          |          |          |   |          |          |          |   |          |          |          |   |          |          |          |   |          |          |          |   |          |          |          |   |          |          |          |   |          |          |          |   |          |          |         |   |          |          |         |   |          |          |          |   |          |          |          |   |          |          |          |   |          |          |          |   |          |          |          |   |          |          |          |   |          |          |          |   |          |          |          |    |          |          |          |    |          |          |          |   |          |          |          |   |          |          |          |   |          |          |          |   |          |          |          |   |          |          |         |   |          |          |         |   |          |          |         |   |          |          |         |
| C                                                                                                                                                       | 0.14762                                                                                                                                                                                                                                                                                                                                                                                                                                                                                                                                                                                                                                                                                                                                                                                                                                                                                                                                                                                                                                                                                                                                                                                                                                                                                                                                                                                                                                                                                                                                                                                                                                                                                                                                                                                                                                                                                                                                                                                                                                                                | -0.07230 | 3.89996  |          |          |   |          |          |          |   |          |          |          |   |          |         |          |   |          |         |          |   |          |          |          |   |          |          |          |   |          |         |          |   |          |          |         |   |          |          |         |   |          |          |         |   |          |          |         |   |          |         |         |   |          |          |         |   |          |          |         |   |          |          |          |   |          |          |         |   |          |          |          |    |          |          |          |    |          |          |         |   |          |          |          |   |          |          |          |   |          |          |          |   |          |          |          |   |          |         |          |   |          |          |          |                                                                                                                                                         |                                                                                                                                                                                                                                                                                                                                                                                                                                                                                                                                                                                                                                                                                                                                                                                                                                                                                                                                                                                                                                                                                                                                                                                                                                                                                                                                                                                                                                                                                                                                                                                                                                                                                                                                                                                                                                                                                                                                   |         |          |          |          |         |          |                                                                                                                                                        |                                                                                                                                                                                                                                                                                                                                                                                                                                                                                                                                                                                                                                                                                                                                                                                                                                                                                                                                                                                                                                                                                                                                                                                                                                                                                                                                                                                                                                                                                                                                                                                                                                                                                                                                                                                                                                                                                                                                                                                                                                                                             |   |          |          |          |   |          |          |          |   |          |          |          |   |          |          |          |   |          |          |          |   |          |          |          |   |          |          |          |   |          |          |          |   |          |          |         |   |          |          |         |   |          |          |          |   |          |          |          |   |          |          |          |   |          |          |          |   |          |          |          |   |          |          |          |   |          |          |          |   |          |          |          |    |          |          |          |    |          |          |          |   |          |          |          |   |          |          |          |   |          |          |          |   |          |          |          |   |          |          |         |   |          |          |         |   |          |          |         |   |          |          |         |
| C                                                                                                                                                       | 0.38616                                                                                                                                                                                                                                                                                                                                                                                                                                                                                                                                                                                                                                                                                                                                                                                                                                                                                                                                                                                                                                                                                                                                                                                                                                                                                                                                                                                                                                                                                                                                                                                                                                                                                                                                                                                                                                                                                                                                                                                                                                                                | -1.24078 | 1.80324  |          |          |   |          |          |          |   |          |          |          |   |          |         |          |   |          |         |          |   |          |          |          |   |          |          |          |   |          |         |          |   |          |          |         |   |          |          |         |   |          |          |         |   |          |          |         |   |          |         |         |   |          |          |         |   |          |          |         |   |          |          |          |   |          |          |         |   |          |          |          |    |          |          |          |    |          |          |         |   |          |          |          |   |          |          |          |   |          |          |          |   |          |          |          |   |          |         |          |   |          |          |          |                                                                                                                                                         |                                                                                                                                                                                                                                                                                                                                                                                                                                                                                                                                                                                                                                                                                                                                                                                                                                                                                                                                                                                                                                                                                                                                                                                                                                                                                                                                                                                                                                                                                                                                                                                                                                                                                                                                                                                                                                                                                                                                   |         |          |          |          |         |          |                                                                                                                                                        |                                                                                                                                                                                                                                                                                                                                                                                                                                                                                                                                                                                                                                                                                                                                                                                                                                                                                                                                                                                                                                                                                                                                                                                                                                                                                                                                                                                                                                                                                                                                                                                                                                                                                                                                                                                                                                                                                                                                                                                                                                                                             |   |          |          |          |   |          |          |          |   |          |          |          |   |          |          |          |   |          |          |          |   |          |          |          |   |          |          |          |   |          |          |          |   |          |          |         |   |          |          |         |   |          |          |          |   |          |          |          |   |          |          |          |   |          |          |          |   |          |          |          |   |          |          |          |   |          |          |          |   |          |          |          |    |          |          |          |    |          |          |          |   |          |          |          |   |          |          |          |   |          |          |          |   |          |          |          |   |          |          |         |   |          |          |         |   |          |          |         |   |          |          |         |
| C                                                                                                                                                       | -0.11213                                                                                                                                                                                                                                                                                                                                                                                                                                                                                                                                                                                                                                                                                                                                                                                                                                                                                                                                                                                                                                                                                                                                                                                                                                                                                                                                                                                                                                                                                                                                                                                                                                                                                                                                                                                                                                                                                                                                                                                                                                                               | 1.11655  | 1.82134  |          |          |   |          |          |          |   |          |          |          |   |          |         |          |   |          |         |          |   |          |          |          |   |          |          |          |   |          |         |          |   |          |          |         |   |          |          |         |   |          |          |         |   |          |          |         |   |          |         |         |   |          |          |         |   |          |          |         |   |          |          |          |   |          |          |         |   |          |          |          |    |          |          |          |    |          |          |         |   |          |          |          |   |          |          |          |   |          |          |          |   |          |          |          |   |          |         |          |   |          |          |          |                                                                                                                                                         |                                                                                                                                                                                                                                                                                                                                                                                                                                                                                                                                                                                                                                                                                                                                                                                                                                                                                                                                                                                                                                                                                                                                                                                                                                                                                                                                                                                                                                                                                                                                                                                                                                                                                                                                                                                                                                                                                                                                   |         |          |          |          |         |          |                                                                                                                                                        |                                                                                                                                                                                                                                                                                                                                                                                                                                                                                                                                                                                                                                                                                                                                                                                                                                                                                                                                                                                                                                                                                                                                                                                                                                                                                                                                                                                                                                                                                                                                                                                                                                                                                                                                                                                                                                                                                                                                                                                                                                                                             |   |          |          |          |   |          |          |          |   |          |          |          |   |          |          |          |   |          |          |          |   |          |          |          |   |          |          |          |   |          |          |          |   |          |          |         |   |          |          |         |   |          |          |          |   |          |          |          |   |          |          |          |   |          |          |          |   |          |          |          |   |          |          |          |   |          |          |          |   |          |          |          |    |          |          |          |    |          |          |          |   |          |          |          |   |          |          |          |   |          |          |          |   |          |          |          |   |          |          |         |   |          |          |         |   |          |          |         |   |          |          |         |
| C                                                                                                                                                       | -0.10990                                                                                                                                                                                                                                                                                                                                                                                                                                                                                                                                                                                                                                                                                                                                                                                                                                                                                                                                                                                                                                                                                                                                                                                                                                                                                                                                                                                                                                                                                                                                                                                                                                                                                                                                                                                                                                                                                                                                                                                                                                                               | 1.11246  | 3.20653  |          |          |   |          |          |          |   |          |          |          |   |          |         |          |   |          |         |          |   |          |          |          |   |          |          |          |   |          |         |          |   |          |          |         |   |          |          |         |   |          |          |         |   |          |          |         |   |          |         |         |   |          |          |         |   |          |          |         |   |          |          |          |   |          |          |         |   |          |          |          |    |          |          |          |    |          |          |         |   |          |          |          |   |          |          |          |   |          |          |          |   |          |          |          |   |          |         |          |   |          |          |          |                                                                                                                                                         |                                                                                                                                                                                                                                                                                                                                                                                                                                                                                                                                                                                                                                                                                                                                                                                                                                                                                                                                                                                                                                                                                                                                                                                                                                                                                                                                                                                                                                                                                                                                                                                                                                                                                                                                                                                                                                                                                                                                   |         |          |          |          |         |          |                                                                                                                                                        |                                                                                                                                                                                                                                                                                                                                                                                                                                                                                                                                                                                                                                                                                                                                                                                                                                                                                                                                                                                                                                                                                                                                                                                                                                                                                                                                                                                                                                                                                                                                                                                                                                                                                                                                                                                                                                                                                                                                                                                                                                                                             |   |          |          |          |   |          |          |          |   |          |          |          |   |          |          |          |   |          |          |          |   |          |          |          |   |          |          |          |   |          |          |          |   |          |          |         |   |          |          |         |   |          |          |          |   |          |          |          |   |          |          |          |   |          |          |          |   |          |          |          |   |          |          |          |   |          |          |          |   |          |          |          |    |          |          |          |    |          |          |          |   |          |          |          |   |          |          |          |   |          |          |          |   |          |          |          |   |          |          |         |   |          |          |         |   |          |          |         |   |          |          |         |
| C                                                                                                                                                       | 0.39309                                                                                                                                                                                                                                                                                                                                                                                                                                                                                                                                                                                                                                                                                                                                                                                                                                                                                                                                                                                                                                                                                                                                                                                                                                                                                                                                                                                                                                                                                                                                                                                                                                                                                                                                                                                                                                                                                                                                                                                                                                                                | -1.26533 | 3.19993  |          |          |   |          |          |          |   |          |          |          |   |          |         |          |   |          |         |          |   |          |          |          |   |          |          |          |   |          |         |          |   |          |          |         |   |          |          |         |   |          |          |         |   |          |          |         |   |          |         |         |   |          |          |         |   |          |          |         |   |          |          |          |   |          |          |         |   |          |          |          |    |          |          |          |    |          |          |         |   |          |          |          |   |          |          |          |   |          |          |          |   |          |          |          |   |          |         |          |   |          |          |          |                                                                                                                                                         |                                                                                                                                                                                                                                                                                                                                                                                                                                                                                                                                                                                                                                                                                                                                                                                                                                                                                                                                                                                                                                                                                                                                                                                                                                                                                                                                                                                                                                                                                                                                                                                                                                                                                                                                                                                                                                                                                                                                   |         |          |          |          |         |          |                                                                                                                                                        |                                                                                                                                                                                                                                                                                                                                                                                                                                                                                                                                                                                                                                                                                                                                                                                                                                                                                                                                                                                                                                                                                                                                                                                                                                                                                                                                                                                                                                                                                                                                                                                                                                                                                                                                                                                                                                                                                                                                                                                                                                                                             |   |          |          |          |   |          |          |          |   |          |          |          |   |          |          |          |   |          |          |          |   |          |          |          |   |          |          |          |   |          |          |          |   |          |          |         |   |          |          |         |   |          |          |          |   |          |          |          |   |          |          |          |   |          |          |          |   |          |          |          |   |          |          |          |   |          |          |          |   |          |          |          |    |          |          |          |    |          |          |          |   |          |          |          |   |          |          |          |   |          |          |          |   |          |          |          |   |          |          |         |   |          |          |         |   |          |          |         |   |          |          |         |
| H                                                                                                                                                       | 0.56612                                                                                                                                                                                                                                                                                                                                                                                                                                                                                                                                                                                                                                                                                                                                                                                                                                                                                                                                                                                                                                                                                                                                                                                                                                                                                                                                                                                                                                                                                                                                                                                                                                                                                                                                                                                                                                                                                                                                                                                                                                                                | -2.16208 | 1.26066  |          |          |   |          |          |          |   |          |          |          |   |          |         |          |   |          |         |          |   |          |          |          |   |          |          |          |   |          |         |          |   |          |          |         |   |          |          |         |   |          |          |         |   |          |          |         |   |          |         |         |   |          |          |         |   |          |          |         |   |          |          |          |   |          |          |         |   |          |          |          |    |          |          |          |    |          |          |         |   |          |          |          |   |          |          |          |   |          |          |          |   |          |          |          |   |          |         |          |   |          |          |          |                                                                                                                                                         |                                                                                                                                                                                                                                                                                                                                                                                                                                                                                                                                                                                                                                                                                                                                                                                                                                                                                                                                                                                                                                                                                                                                                                                                                                                                                                                                                                                                                                                                                                                                                                                                                                                                                                                                                                                                                                                                                                                                   |         |          |          |          |         |          |                                                                                                                                                        |                                                                                                                                                                                                                                                                                                                                                                                                                                                                                                                                                                                                                                                                                                                                                                                                                                                                                                                                                                                                                                                                                                                                                                                                                                                                                                                                                                                                                                                                                                                                                                                                                                                                                                                                                                                                                                                                                                                                                                                                                                                                             |   |          |          |          |   |          |          |          |   |          |          |          |   |          |          |          |   |          |          |          |   |          |          |          |   |          |          |          |   |          |          |          |   |          |          |         |   |          |          |         |   |          |          |          |   |          |          |          |   |          |          |          |   |          |          |          |   |          |          |          |   |          |          |          |   |          |          |          |   |          |          |          |    |          |          |          |    |          |          |          |   |          |          |          |   |          |          |          |   |          |          |          |   |          |          |          |   |          |          |         |   |          |          |         |   |          |          |         |   |          |          |         |
| H                                                                                                                                                       | -0.30298                                                                                                                                                                                                                                                                                                                                                                                                                                                                                                                                                                                                                                                                                                                                                                                                                                                                                                                                                                                                                                                                                                                                                                                                                                                                                                                                                                                                                                                                                                                                                                                                                                                                                                                                                                                                                                                                                                                                                                                                                                                               | 2.02125  | 3.76361  |          |          |   |          |          |          |   |          |          |          |   |          |         |          |   |          |         |          |   |          |          |          |   |          |          |          |   |          |         |          |   |          |          |         |   |          |          |         |   |          |          |         |   |          |          |         |   |          |         |         |   |          |          |         |   |          |          |         |   |          |          |          |   |          |          |         |   |          |          |          |    |          |          |          |    |          |          |         |   |          |          |          |   |          |          |          |   |          |          |          |   |          |          |          |   |          |         |          |   |          |          |          |                                                                                                                                                         |                                                                                                                                                                                                                                                                                                                                                                                                                                                                                                                                                                                                                                                                                                                                                                                                                                                                                                                                                                                                                                                                                                                                                                                                                                                                                                                                                                                                                                                                                                                                                                                                                                                                                                                                                                                                                                                                                                                                   |         |          |          |          |         |          |                                                                                                                                                        |                                                                                                                                                                                                                                                                                                                                                                                                                                                                                                                                                                                                                                                                                                                                                                                                                                                                                                                                                                                                                                                                                                                                                                                                                                                                                                                                                                                                                                                                                                                                                                                                                                                                                                                                                                                                                                                                                                                                                                                                                                                                             |   |          |          |          |   |          |          |          |   |          |          |          |   |          |          |          |   |          |          |          |   |          |          |          |   |          |          |          |   |          |          |          |   |          |          |         |   |          |          |         |   |          |          |          |   |          |          |          |   |          |          |          |   |          |          |          |   |          |          |          |   |          |          |          |   |          |          |          |   |          |          |          |    |          |          |          |    |          |          |          |   |          |          |          |   |          |          |          |   |          |          |          |   |          |          |          |   |          |          |         |   |          |          |         |   |          |          |         |   |          |          |         |
| C                                                                                                                                                       | 0.12094                                                                                                                                                                                                                                                                                                                                                                                                                                                                                                                                                                                                                                                                                                                                                                                                                                                                                                                                                                                                                                                                                                                                                                                                                                                                                                                                                                                                                                                                                                                                                                                                                                                                                                                                                                                                                                                                                                                                                                                                                                                                | -0.05382 | 5.38653  |          |          |   |          |          |          |   |          |          |          |   |          |         |          |   |          |         |          |   |          |          |          |   |          |          |          |   |          |         |          |   |          |          |         |   |          |          |         |   |          |          |         |   |          |          |         |   |          |         |         |   |          |          |         |   |          |          |         |   |          |          |          |   |          |          |         |   |          |          |          |    |          |          |          |    |          |          |         |   |          |          |          |   |          |          |          |   |          |          |          |   |          |          |          |   |          |         |          |   |          |          |          |                                                                                                                                                         |                                                                                                                                                                                                                                                                                                                                                                                                                                                                                                                                                                                                                                                                                                                                                                                                                                                                                                                                                                                                                                                                                                                                                                                                                                                                                                                                                                                                                                                                                                                                                                                                                                                                                                                                                                                                                                                                                                                                   |         |          |          |          |         |          |                                                                                                                                                        |                                                                                                                                                                                                                                                                                                                                                                                                                                                                                                                                                                                                                                                                                                                                                                                                                                                                                                                                                                                                                                                                                                                                                                                                                                                                                                                                                                                                                                                                                                                                                                                                                                                                                                                                                                                                                                                                                                                                                                                                                                                                             |   |          |          |          |   |          |          |          |   |          |          |          |   |          |          |          |   |          |          |          |   |          |          |          |   |          |          |          |   |          |          |          |   |          |          |         |   |          |          |         |   |          |          |          |   |          |          |          |   |          |          |          |   |          |          |          |   |          |          |          |   |          |          |          |   |          |          |          |   |          |          |          |    |          |          |          |    |          |          |          |   |          |          |          |   |          |          |          |   |          |          |          |   |          |          |          |   |          |          |         |   |          |          |         |   |          |          |         |   |          |          |         |
| C                                                                                                                                                       | -0.03100                                                                                                                                                                                                                                                                                                                                                                                                                                                                                                                                                                                                                                                                                                                                                                                                                                                                                                                                                                                                                                                                                                                                                                                                                                                                                                                                                                                                                                                                                                                                                                                                                                                                                                                                                                                                                                                                                                                                                                                                                                                               | -0.01915 | 8.19716  |          |          |   |          |          |          |   |          |          |          |   |          |         |          |   |          |         |          |   |          |          |          |   |          |          |          |   |          |         |          |   |          |          |         |   |          |          |         |   |          |          |         |   |          |          |         |   |          |         |         |   |          |          |         |   |          |          |         |   |          |          |          |   |          |          |         |   |          |          |          |    |          |          |          |    |          |          |         |   |          |          |          |   |          |          |          |   |          |          |          |   |          |          |          |   |          |         |          |   |          |          |          |                                                                                                                                                         |                                                                                                                                                                                                                                                                                                                                                                                                                                                                                                                                                                                                                                                                                                                                                                                                                                                                                                                                                                                                                                                                                                                                                                                                                                                                                                                                                                                                                                                                                                                                                                                                                                                                                                                                                                                                                                                                                                                                   |         |          |          |          |         |          |                                                                                                                                                        |                                                                                                                                                                                                                                                                                                                                                                                                                                                                                                                                                                                                                                                                                                                                                                                                                                                                                                                                                                                                                                                                                                                                                                                                                                                                                                                                                                                                                                                                                                                                                                                                                                                                                                                                                                                                                                                                                                                                                                                                                                                                             |   |          |          |          |   |          |          |          |   |          |          |          |   |          |          |          |   |          |          |          |   |          |          |          |   |          |          |          |   |          |          |          |   |          |          |         |   |          |          |         |   |          |          |          |   |          |          |          |   |          |          |          |   |          |          |          |   |          |          |          |   |          |          |          |   |          |          |          |   |          |          |          |    |          |          |          |    |          |          |          |   |          |          |          |   |          |          |          |   |          |          |          |   |          |          |          |   |          |          |         |   |          |          |         |   |          |          |         |   |          |          |         |
| C                                                                                                                                                       | 1.27210                                                                                                                                                                                                                                                                                                                                                                                                                                                                                                                                                                                                                                                                                                                                                                                                                                                                                                                                                                                                                                                                                                                                                                                                                                                                                                                                                                                                                                                                                                                                                                                                                                                                                                                                                                                                                                                                                                                                                                                                                                                                | -0.06909 | 6.17871  |          |          |   |          |          |          |   |          |          |          |   |          |         |          |   |          |         |          |   |          |          |          |   |          |          |          |   |          |         |          |   |          |          |         |   |          |          |         |   |          |          |         |   |          |          |         |   |          |         |         |   |          |          |         |   |          |          |         |   |          |          |          |   |          |          |         |   |          |          |          |    |          |          |          |    |          |          |         |   |          |          |          |   |          |          |          |   |          |          |          |   |          |          |          |   |          |         |          |   |          |          |          |                                                                                                                                                         |                                                                                                                                                                                                                                                                                                                                                                                                                                                                                                                                                                                                                                                                                                                                                                                                                                                                                                                                                                                                                                                                                                                                                                                                                                                                                                                                                                                                                                                                                                                                                                                                                                                                                                                                                                                                                                                                                                                                   |         |          |          |          |         |          |                                                                                                                                                        |                                                                                                                                                                                                                                                                                                                                                                                                                                                                                                                                                                                                                                                                                                                                                                                                                                                                                                                                                                                                                                                                                                                                                                                                                                                                                                                                                                                                                                                                                                                                                                                                                                                                                                                                                                                                                                                                                                                                                                                                                                                                             |   |          |          |          |   |          |          |          |   |          |          |          |   |          |          |          |   |          |          |          |   |          |          |          |   |          |          |          |   |          |          |          |   |          |          |         |   |          |          |         |   |          |          |          |   |          |          |          |   |          |          |          |   |          |          |          |   |          |          |          |   |          |          |          |   |          |          |          |   |          |          |          |    |          |          |          |    |          |          |          |   |          |          |          |   |          |          |          |   |          |          |          |   |          |          |          |   |          |          |         |   |          |          |         |   |          |          |         |   |          |          |         |
| C                                                                                                                                                       | -1.11065                                                                                                                                                                                                                                                                                                                                                                                                                                                                                                                                                                                                                                                                                                                                                                                                                                                                                                                                                                                                                                                                                                                                                                                                                                                                                                                                                                                                                                                                                                                                                                                                                                                                                                                                                                                                                                                                                                                                                                                                                                                               | -0.00938 | 6.04919  |          |          |   |          |          |          |   |          |          |          |   |          |         |          |   |          |         |          |   |          |          |          |   |          |          |          |   |          |         |          |   |          |          |         |   |          |          |         |   |          |          |         |   |          |          |         |   |          |         |         |   |          |          |         |   |          |          |         |   |          |          |          |   |          |          |         |   |          |          |          |    |          |          |          |    |          |          |         |   |          |          |          |   |          |          |          |   |          |          |          |   |          |          |          |   |          |         |          |   |          |          |          |                                                                                                                                                         |                                                                                                                                                                                                                                                                                                                                                                                                                                                                                                                                                                                                                                                                                                                                                                                                                                                                                                                                                                                                                                                                                                                                                                                                                                                                                                                                                                                                                                                                                                                                                                                                                                                                                                                                                                                                                                                                                                                                   |         |          |          |          |         |          |                                                                                                                                                        |                                                                                                                                                                                                                                                                                                                                                                                                                                                                                                                                                                                                                                                                                                                                                                                                                                                                                                                                                                                                                                                                                                                                                                                                                                                                                                                                                                                                                                                                                                                                                                                                                                                                                                                                                                                                                                                                                                                                                                                                                                                                             |   |          |          |          |   |          |          |          |   |          |          |          |   |          |          |          |   |          |          |          |   |          |          |          |   |          |          |          |   |          |          |          |   |          |          |         |   |          |          |         |   |          |          |          |   |          |          |          |   |          |          |          |   |          |          |          |   |          |          |          |   |          |          |          |   |          |          |          |   |          |          |          |    |          |          |          |    |          |          |          |   |          |          |          |   |          |          |          |   |          |          |          |   |          |          |          |   |          |          |         |   |          |          |         |   |          |          |         |   |          |          |         |
| C                                                                                                                                                       | -1.19432                                                                                                                                                                                                                                                                                                                                                                                                                                                                                                                                                                                                                                                                                                                                                                                                                                                                                                                                                                                                                                                                                                                                                                                                                                                                                                                                                                                                                                                                                                                                                                                                                                                                                                                                                                                                                                                                                                                                                                                                                                                               | 0.00750  | 7.43556  |          |          |   |          |          |          |   |          |          |          |   |          |         |          |   |          |         |          |   |          |          |          |   |          |          |          |   |          |         |          |   |          |          |         |   |          |          |         |   |          |          |         |   |          |          |         |   |          |         |         |   |          |          |         |   |          |          |         |   |          |          |          |   |          |          |         |   |          |          |          |    |          |          |          |    |          |          |         |   |          |          |          |   |          |          |          |   |          |          |          |   |          |          |          |   |          |         |          |   |          |          |          |                                                                                                                                                         |                                                                                                                                                                                                                                                                                                                                                                                                                                                                                                                                                                                                                                                                                                                                                                                                                                                                                                                                                                                                                                                                                                                                                                                                                                                                                                                                                                                                                                                                                                                                                                                                                                                                                                                                                                                                                                                                                                                                   |         |          |          |          |         |          |                                                                                                                                                        |                                                                                                                                                                                                                                                                                                                                                                                                                                                                                                                                                                                                                                                                                                                                                                                                                                                                                                                                                                                                                                                                                                                                                                                                                                                                                                                                                                                                                                                                                                                                                                                                                                                                                                                                                                                                                                                                                                                                                                                                                                                                             |   |          |          |          |   |          |          |          |   |          |          |          |   |          |          |          |   |          |          |          |   |          |          |          |   |          |          |          |   |          |          |          |   |          |          |         |   |          |          |         |   |          |          |          |   |          |          |          |   |          |          |          |   |          |          |          |   |          |          |          |   |          |          |          |   |          |          |          |   |          |          |          |    |          |          |          |    |          |          |          |   |          |          |          |   |          |          |          |   |          |          |          |   |          |          |          |   |          |          |         |   |          |          |         |   |          |          |         |   |          |          |         |
| C                                                                                                                                                       | 1.20770                                                                                                                                                                                                                                                                                                                                                                                                                                                                                                                                                                                                                                                                                                                                                                                                                                                                                                                                                                                                                                                                                                                                                                                                                                                                                                                                                                                                                                                                                                                                                                                                                                                                                                                                                                                                                                                                                                                                                                                                                                                                | -0.05431 | 7.56807  |          |          |   |          |          |          |   |          |          |          |   |          |         |          |   |          |         |          |   |          |          |          |   |          |          |          |   |          |         |          |   |          |          |         |   |          |          |         |   |          |          |         |   |          |          |         |   |          |         |         |   |          |          |         |   |          |          |         |   |          |          |          |   |          |          |         |   |          |          |          |    |          |          |          |    |          |          |         |   |          |          |          |   |          |          |          |   |          |          |          |   |          |          |          |   |          |         |          |   |          |          |          |                                                                                                                                                         |                                                                                                                                                                                                                                                                                                                                                                                                                                                                                                                                                                                                                                                                                                                                                                                                                                                                                                                                                                                                                                                                                                                                                                                                                                                                                                                                                                                                                                                                                                                                                                                                                                                                                                                                                                                                                                                                                                                                   |         |          |          |          |         |          |                                                                                                                                                        |                                                                                                                                                                                                                                                                                                                                                                                                                                                                                                                                                                                                                                                                                                                                                                                                                                                                                                                                                                                                                                                                                                                                                                                                                                                                                                                                                                                                                                                                                                                                                                                                                                                                                                                                                                                                                                                                                                                                                                                                                                                                             |   |          |          |          |   |          |          |          |   |          |          |          |   |          |          |          |   |          |          |          |   |          |          |          |   |          |          |          |   |          |          |          |   |          |          |         |   |          |          |         |   |          |          |          |   |          |          |          |   |          |          |          |   |          |          |          |   |          |          |          |   |          |          |          |   |          |          |          |   |          |          |          |    |          |          |          |    |          |          |          |   |          |          |          |   |          |          |          |   |          |          |          |   |          |          |          |   |          |          |         |   |          |          |         |   |          |          |         |   |          |          |         |
| H                                                                                                                                                       | -2.01130                                                                                                                                                                                                                                                                                                                                                                                                                                                                                                                                                                                                                                                                                                                                                                                                                                                                                                                                                                                                                                                                                                                                                                                                                                                                                                                                                                                                                                                                                                                                                                                                                                                                                                                                                                                                                                                                                                                                                                                                                                                               | 0.00569  | 5.44931  |          |          |   |          |          |          |   |          |          |          |   |          |         |          |   |          |         |          |   |          |          |          |   |          |          |          |   |          |         |          |   |          |          |         |   |          |          |         |   |          |          |         |   |          |          |         |   |          |         |         |   |          |          |         |   |          |          |         |   |          |          |          |   |          |          |         |   |          |          |          |    |          |          |          |    |          |          |         |   |          |          |          |   |          |          |          |   |          |          |          |   |          |          |          |   |          |         |          |   |          |          |          |                                                                                                                                                         |                                                                                                                                                                                                                                                                                                                                                                                                                                                                                                                                                                                                                                                                                                                                                                                                                                                                                                                                                                                                                                                                                                                                                                                                                                                                                                                                                                                                                                                                                                                                                                                                                                                                                                                                                                                                                                                                                                                                   |         |          |          |          |         |          |                                                                                                                                                        |                                                                                                                                                                                                                                                                                                                                                                                                                                                                                                                                                                                                                                                                                                                                                                                                                                                                                                                                                                                                                                                                                                                                                                                                                                                                                                                                                                                                                                                                                                                                                                                                                                                                                                                                                                                                                                                                                                                                                                                                                                                                             |   |          |          |          |   |          |          |          |   |          |          |          |   |          |          |          |   |          |          |          |   |          |          |          |   |          |          |          |   |          |          |          |   |          |          |         |   |          |          |         |   |          |          |          |   |          |          |          |   |          |          |          |   |          |          |          |   |          |          |          |   |          |          |          |   |          |          |          |   |          |          |          |    |          |          |          |    |          |          |          |   |          |          |          |   |          |          |          |   |          |          |          |   |          |          |          |   |          |          |         |   |          |          |         |   |          |          |         |   |          |          |         |
| H                                                                                                                                                       | -2.16233                                                                                                                                                                                                                                                                                                                                                                                                                                                                                                                                                                                                                                                                                                                                                                                                                                                                                                                                                                                                                                                                                                                                                                                                                                                                                                                                                                                                                                                                                                                                                                                                                                                                                                                                                                                                                                                                                                                                                                                                                                                               | 0.03917  | 7.91784  |          |          |   |          |          |          |   |          |          |          |   |          |         |          |   |          |         |          |   |          |          |          |   |          |          |          |   |          |         |          |   |          |          |         |   |          |          |         |   |          |          |         |   |          |          |         |   |          |         |         |   |          |          |         |   |          |          |         |   |          |          |          |   |          |          |         |   |          |          |          |    |          |          |          |    |          |          |         |   |          |          |          |   |          |          |          |   |          |          |          |   |          |          |          |   |          |         |          |   |          |          |          |                                                                                                                                                         |                                                                                                                                                                                                                                                                                                                                                                                                                                                                                                                                                                                                                                                                                                                                                                                                                                                                                                                                                                                                                                                                                                                                                                                                                                                                                                                                                                                                                                                                                                                                                                                                                                                                                                                                                                                                                                                                                                                                   |         |          |          |          |         |          |                                                                                                                                                        |                                                                                                                                                                                                                                                                                                                                                                                                                                                                                                                                                                                                                                                                                                                                                                                                                                                                                                                                                                                                                                                                                                                                                                                                                                                                                                                                                                                                                                                                                                                                                                                                                                                                                                                                                                                                                                                                                                                                                                                                                                                                             |   |          |          |          |   |          |          |          |   |          |          |          |   |          |          |          |   |          |          |          |   |          |          |          |   |          |          |          |   |          |          |          |   |          |          |         |   |          |          |         |   |          |          |          |   |          |          |          |   |          |          |          |   |          |          |          |   |          |          |          |   |          |          |          |   |          |          |          |   |          |          |          |    |          |          |          |    |          |          |          |   |          |          |          |   |          |          |          |   |          |          |          |   |          |          |          |   |          |          |         |   |          |          |         |   |          |          |         |   |          |          |         |
| H                                                                                                                                                       | 2.11858                                                                                                                                                                                                                                                                                                                                                                                                                                                                                                                                                                                                                                                                                                                                                                                                                                                                                                                                                                                                                                                                                                                                                                                                                                                                                                                                                                                                                                                                                                                                                                                                                                                                                                                                                                                                                                                                                                                                                                                                                                                                | -0.06377 | 8.14946  |          |          |   |          |          |          |   |          |          |          |   |          |         |          |   |          |         |          |   |          |          |          |   |          |          |          |   |          |         |          |   |          |          |         |   |          |          |         |   |          |          |         |   |          |          |         |   |          |         |         |   |          |          |         |   |          |          |         |   |          |          |          |   |          |          |         |   |          |          |          |    |          |          |          |    |          |          |         |   |          |          |          |   |          |          |          |   |          |          |          |   |          |          |          |   |          |         |          |   |          |          |          |                                                                                                                                                         |                                                                                                                                                                                                                                                                                                                                                                                                                                                                                                                                                                                                                                                                                                                                                                                                                                                                                                                                                                                                                                                                                                                                                                                                                                                                                                                                                                                                                                                                                                                                                                                                                                                                                                                                                                                                                                                                                                                                   |         |          |          |          |         |          |                                                                                                                                                        |                                                                                                                                                                                                                                                                                                                                                                                                                                                                                                                                                                                                                                                                                                                                                                                                                                                                                                                                                                                                                                                                                                                                                                                                                                                                                                                                                                                                                                                                                                                                                                                                                                                                                                                                                                                                                                                                                                                                                                                                                                                                             |   |          |          |          |   |          |          |          |   |          |          |          |   |          |          |          |   |          |          |          |   |          |          |          |   |          |          |          |   |          |          |          |   |          |          |         |   |          |          |         |   |          |          |          |   |          |          |          |   |          |          |          |   |          |          |          |   |          |          |          |   |          |          |          |   |          |          |          |   |          |          |          |    |          |          |          |    |          |          |          |   |          |          |          |   |          |          |          |   |          |          |          |   |          |          |          |   |          |          |         |   |          |          |         |   |          |          |         |   |          |          |         |
| H                                                                                                                                                       | -0.08068                                                                                                                                                                                                                                                                                                                                                                                                                                                                                                                                                                                                                                                                                                                                                                                                                                                                                                                                                                                                                                                                                                                                                                                                                                                                                                                                                                                                                                                                                                                                                                                                                                                                                                                                                                                                                                                                                                                                                                                                                                                               | -0.00812 | 9.27797  |          |          |   |          |          |          |   |          |          |          |   |          |         |          |   |          |         |          |   |          |          |          |   |          |          |          |   |          |         |          |   |          |          |         |   |          |          |         |   |          |          |         |   |          |          |         |   |          |         |         |   |          |          |         |   |          |          |         |   |          |          |          |   |          |          |         |   |          |          |          |    |          |          |          |    |          |          |         |   |          |          |          |   |          |          |          |   |          |          |          |   |          |          |          |   |          |         |          |   |          |          |          |                                                                                                                                                         |                                                                                                                                                                                                                                                                                                                                                                                                                                                                                                                                                                                                                                                                                                                                                                                                                                                                                                                                                                                                                                                                                                                                                                                                                                                                                                                                                                                                                                                                                                                                                                                                                                                                                                                                                                                                                                                                                                                                   |         |          |          |          |         |          |                                                                                                                                                        |                                                                                                                                                                                                                                                                                                                                                                                                                                                                                                                                                                                                                                                                                                                                                                                                                                                                                                                                                                                                                                                                                                                                                                                                                                                                                                                                                                                                                                                                                                                                                                                                                                                                                                                                                                                                                                                                                                                                                                                                                                                                             |   |          |          |          |   |          |          |          |   |          |          |          |   |          |          |          |   |          |          |          |   |          |          |          |   |          |          |          |   |          |          |          |   |          |          |         |   |          |          |         |   |          |          |          |   |          |          |          |   |          |          |          |   |          |          |          |   |          |          |          |   |          |          |          |   |          |          |          |   |          |          |          |    |          |          |          |    |          |          |          |   |          |          |          |   |          |          |          |   |          |          |          |   |          |          |          |   |          |          |         |   |          |          |         |   |          |          |         |   |          |          |         |
| C                                                                                                                                                       | 0.64839                                                                                                                                                                                                                                                                                                                                                                                                                                                                                                                                                                                                                                                                                                                                                                                                                                                                                                                                                                                                                                                                                                                                                                                                                                                                                                                                                                                                                                                                                                                                                                                                                                                                                                                                                                                                                                                                                                                                                                                                                                                                | -2.55576 | 3.93323  |          |          |   |          |          |          |   |          |          |          |   |          |         |          |   |          |         |          |   |          |          |          |   |          |          |          |   |          |         |          |   |          |          |         |   |          |          |         |   |          |          |         |   |          |          |         |   |          |         |         |   |          |          |         |   |          |          |         |   |          |          |          |   |          |          |         |   |          |          |          |    |          |          |          |    |          |          |         |   |          |          |          |   |          |          |          |   |          |          |          |   |          |          |          |   |          |         |          |   |          |          |          |                                                                                                                                                         |                                                                                                                                                                                                                                                                                                                                                                                                                                                                                                                                                                                                                                                                                                                                                                                                                                                                                                                                                                                                                                                                                                                                                                                                                                                                                                                                                                                                                                                                                                                                                                                                                                                                                                                                                                                                                                                                                                                                   |         |          |          |          |         |          |                                                                                                                                                        |                                                                                                                                                                                                                                                                                                                                                                                                                                                                                                                                                                                                                                                                                                                                                                                                                                                                                                                                                                                                                                                                                                                                                                                                                                                                                                                                                                                                                                                                                                                                                                                                                                                                                                                                                                                                                                                                                                                                                                                                                                                                             |   |          |          |          |   |          |          |          |   |          |          |          |   |          |          |          |   |          |          |          |   |          |          |          |   |          |          |          |   |          |          |          |   |          |          |         |   |          |          |         |   |          |          |          |   |          |          |          |   |          |          |          |   |          |          |          |   |          |          |          |   |          |          |          |   |          |          |          |   |          |          |          |    |          |          |          |    |          |          |          |   |          |          |          |   |          |          |          |   |          |          |          |   |          |          |          |   |          |          |         |   |          |          |         |   |          |          |         |   |          |          |         |
| H                                                                                                                                                       | -0.11597                                                                                                                                                                                                                                                                                                                                                                                                                                                                                                                                                                                                                                                                                                                                                                                                                                                                                                                                                                                                                                                                                                                                                                                                                                                                                                                                                                                                                                                                                                                                                                                                                                                                                                                                                                                                                                                                                                                                                                                                                                                               | -2.73775 | 4.69211  |          |          |   |          |          |          |   |          |          |          |   |          |         |          |   |          |         |          |   |          |          |          |   |          |          |          |   |          |         |          |   |          |          |         |   |          |          |         |   |          |          |         |   |          |          |         |   |          |         |         |   |          |          |         |   |          |          |         |   |          |          |          |   |          |          |         |   |          |          |          |    |          |          |          |    |          |          |         |   |          |          |          |   |          |          |          |   |          |          |          |   |          |          |          |   |          |         |          |   |          |          |          |                                                                                                                                                         |                                                                                                                                                                                                                                                                                                                                                                                                                                                                                                                                                                                                                                                                                                                                                                                                                                                                                                                                                                                                                                                                                                                                                                                                                                                                                                                                                                                                                                                                                                                                                                                                                                                                                                                                                                                                                                                                                                                                   |         |          |          |          |         |          |                                                                                                                                                        |                                                                                                                                                                                                                                                                                                                                                                                                                                                                                                                                                                                                                                                                                                                                                                                                                                                                                                                                                                                                                                                                                                                                                                                                                                                                                                                                                                                                                                                                                                                                                                                                                                                                                                                                                                                                                                                                                                                                                                                                                                                                             |   |          |          |          |   |          |          |          |   |          |          |          |   |          |          |          |   |          |          |          |   |          |          |          |   |          |          |          |   |          |          |          |   |          |          |         |   |          |          |         |   |          |          |          |   |          |          |          |   |          |          |          |   |          |          |          |   |          |          |          |   |          |          |          |   |          |          |          |   |          |          |          |    |          |          |          |    |          |          |          |   |          |          |          |   |          |          |          |   |          |          |          |   |          |          |          |   |          |          |         |   |          |          |         |   |          |          |         |   |          |          |         |
| H                                                                                                                                                       | 1.61160                                                                                                                                                                                                                                                                                                                                                                                                                                                                                                                                                                                                                                                                                                                                                                                                                                                                                                                                                                                                                                                                                                                                                                                                                                                                                                                                                                                                                                                                                                                                                                                                                                                                                                                                                                                                                                                                                                                                                                                                                                                                | -2.52875 | 4.44896  |          |          |   |          |          |          |   |          |          |          |   |          |         |          |   |          |         |          |   |          |          |          |   |          |          |          |   |          |         |          |   |          |          |         |   |          |          |         |   |          |          |         |   |          |          |         |   |          |         |         |   |          |          |         |   |          |          |         |   |          |          |          |   |          |          |         |   |          |          |          |    |          |          |          |    |          |          |         |   |          |          |          |   |          |          |          |   |          |          |          |   |          |          |          |   |          |         |          |   |          |          |          |                                                                                                                                                         |                                                                                                                                                                                                                                                                                                                                                                                                                                                                                                                                                                                                                                                                                                                                                                                                                                                                                                                                                                                                                                                                                                                                                                                                                                                                                                                                                                                                                                                                                                                                                                                                                                                                                                                                                                                                                                                                                                                                   |         |          |          |          |         |          |                                                                                                                                                        |                                                                                                                                                                                                                                                                                                                                                                                                                                                                                                                                                                                                                                                                                                                                                                                                                                                                                                                                                                                                                                                                                                                                                                                                                                                                                                                                                                                                                                                                                                                                                                                                                                                                                                                                                                                                                                                                                                                                                                                                                                                                             |   |          |          |          |   |          |          |          |   |          |          |          |   |          |          |          |   |          |          |          |   |          |          |          |   |          |          |          |   |          |          |          |   |          |          |         |   |          |          |         |   |          |          |          |   |          |          |          |   |          |          |          |   |          |          |          |   |          |          |          |   |          |          |          |   |          |          |          |   |          |          |          |    |          |          |          |    |          |          |          |   |          |          |          |   |          |          |          |   |          |          |          |   |          |          |          |   |          |          |         |   |          |          |         |   |          |          |         |   |          |          |         |
| H                                                                                                                                                       | 0.65678                                                                                                                                                                                                                                                                                                                                                                                                                                                                                                                                                                                                                                                                                                                                                                                                                                                                                                                                                                                                                                                                                                                                                                                                                                                                                                                                                                                                                                                                                                                                                                                                                                                                                                                                                                                                                                                                                                                                                                                                                                                                | -3.39746 | 3.23974  |          |          |   |          |          |          |   |          |          |          |   |          |         |          |   |          |         |          |   |          |          |          |   |          |          |          |   |          |         |          |   |          |          |         |   |          |          |         |   |          |          |         |   |          |          |         |   |          |         |         |   |          |          |         |   |          |          |         |   |          |          |          |   |          |          |         |   |          |          |          |    |          |          |          |    |          |          |         |   |          |          |          |   |          |          |          |   |          |          |          |   |          |          |          |   |          |         |          |   |          |          |          |                                                                                                                                                         |                                                                                                                                                                                                                                                                                                                                                                                                                                                                                                                                                                                                                                                                                                                                                                                                                                                                                                                                                                                                                                                                                                                                                                                                                                                                                                                                                                                                                                                                                                                                                                                                                                                                                                                                                                                                                                                                                                                                   |         |          |          |          |         |          |                                                                                                                                                        |                                                                                                                                                                                                                                                                                                                                                                                                                                                                                                                                                                                                                                                                                                                                                                                                                                                                                                                                                                                                                                                                                                                                                                                                                                                                                                                                                                                                                                                                                                                                                                                                                                                                                                                                                                                                                                                                                                                                                                                                                                                                             |   |          |          |          |   |          |          |          |   |          |          |          |   |          |          |          |   |          |          |          |   |          |          |          |   |          |          |          |   |          |          |          |   |          |          |         |   |          |          |         |   |          |          |          |   |          |          |          |   |          |          |          |   |          |          |          |   |          |          |          |   |          |          |          |   |          |          |          |   |          |          |          |    |          |          |          |    |          |          |          |   |          |          |          |   |          |          |          |   |          |          |          |   |          |          |          |   |          |          |         |   |          |          |         |   |          |          |         |   |          |          |         |
| C                                                                                                                                                       | -0.31245                                                                                                                                                                                                                                                                                                                                                                                                                                                                                                                                                                                                                                                                                                                                                                                                                                                                                                                                                                                                                                                                                                                                                                                                                                                                                                                                                                                                                                                                                                                                                                                                                                                                                                                                                                                                                                                                                                                                                                                                                                                               | 2.28712  | 0.87837  |          |          |   |          |          |          |   |          |          |          |   |          |         |          |   |          |         |          |   |          |          |          |   |          |          |          |   |          |         |          |   |          |          |         |   |          |          |         |   |          |          |         |   |          |          |         |   |          |         |         |   |          |          |         |   |          |          |         |   |          |          |          |   |          |          |         |   |          |          |          |    |          |          |          |    |          |          |         |   |          |          |          |   |          |          |          |   |          |          |          |   |          |          |          |   |          |         |          |   |          |          |          |                                                                                                                                                         |                                                                                                                                                                                                                                                                                                                                                                                                                                                                                                                                                                                                                                                                                                                                                                                                                                                                                                                                                                                                                                                                                                                                                                                                                                                                                                                                                                                                                                                                                                                                                                                                                                                                                                                                                                                                                                                                                                                                   |         |          |          |          |         |          |                                                                                                                                                        |                                                                                                                                                                                                                                                                                                                                                                                                                                                                                                                                                                                                                                                                                                                                                                                                                                                                                                                                                                                                                                                                                                                                                                                                                                                                                                                                                                                                                                                                                                                                                                                                                                                                                                                                                                                                                                                                                                                                                                                                                                                                             |   |          |          |          |   |          |          |          |   |          |          |          |   |          |          |          |   |          |          |          |   |          |          |          |   |          |          |          |   |          |          |          |   |          |          |         |   |          |          |         |   |          |          |          |   |          |          |          |   |          |          |          |   |          |          |          |   |          |          |          |   |          |          |          |   |          |          |          |   |          |          |          |    |          |          |          |    |          |          |          |   |          |          |          |   |          |          |          |   |          |          |          |   |          |          |          |   |          |          |         |   |          |          |         |   |          |          |         |   |          |          |         |
| C                                                                                                                                                       | 0.10170                                                                                                                                                                                                                                                                                                                                                                                                                                                                                                                                                                                                                                                                                                                                                                                                                                                                                                                                                                                                                                                                                                                                                                                                                                                                                                                                                                                                                                                                                                                                                                                                                                                                                                                                                                                                                                                                                                                                                                                                                                                                | 0.19833  | -0.36608 |          |          |   |          |          |          |   |          |          |          |   |          |         |          |   |          |         |          |   |          |          |          |   |          |          |          |   |          |         |          |   |          |          |         |   |          |          |         |   |          |          |         |   |          |          |         |   |          |         |         |   |          |          |         |   |          |          |         |   |          |          |          |   |          |          |         |   |          |          |          |    |          |          |          |    |          |          |         |   |          |          |          |   |          |          |          |   |          |          |          |   |          |          |          |   |          |         |          |   |          |          |          |                                                                                                                                                         |                                                                                                                                                                                                                                                                                                                                                                                                                                                                                                                                                                                                                                                                                                                                                                                                                                                                                                                                                                                                                                                                                                                                                                                                                                                                                                                                                                                                                                                                                                                                                                                                                                                                                                                                                                                                                                                                                                                                   |         |          |          |          |         |          |                                                                                                                                                        |                                                                                                                                                                                                                                                                                                                                                                                                                                                                                                                                                                                                                                                                                                                                                                                                                                                                                                                                                                                                                                                                                                                                                                                                                                                                                                                                                                                                                                                                                                                                                                                                                                                                                                                                                                                                                                                                                                                                                                                                                                                                             |   |          |          |          |   |          |          |          |   |          |          |          |   |          |          |          |   |          |          |          |   |          |          |          |   |          |          |          |   |          |          |          |   |          |          |         |   |          |          |         |   |          |          |          |   |          |          |          |   |          |          |          |   |          |          |          |   |          |          |          |   |          |          |          |   |          |          |          |   |          |          |          |    |          |          |          |    |          |          |          |   |          |          |          |   |          |          |          |   |          |          |          |   |          |          |          |   |          |          |         |   |          |          |         |   |          |          |         |   |          |          |         |
| H                                                                                                                                                       | 1.11987                                                                                                                                                                                                                                                                                                                                                                                                                                                                                                                                                                                                                                                                                                                                                                                                                                                                                                                                                                                                                                                                                                                                                                                                                                                                                                                                                                                                                                                                                                                                                                                                                                                                                                                                                                                                                                                                                                                                                                                                                                                                | 0.27421  | -0.76213 |          |          |   |          |          |          |   |          |          |          |   |          |         |          |   |          |         |          |   |          |          |          |   |          |          |          |   |          |         |          |   |          |          |         |   |          |          |         |   |          |          |         |   |          |          |         |   |          |         |         |   |          |          |         |   |          |          |         |   |          |          |          |   |          |          |         |   |          |          |          |    |          |          |          |    |          |          |         |   |          |          |          |   |          |          |          |   |          |          |          |   |          |          |          |   |          |         |          |   |          |          |          |                                                                                                                                                         |                                                                                                                                                                                                                                                                                                                                                                                                                                                                                                                                                                                                                                                                                                                                                                                                                                                                                                                                                                                                                                                                                                                                                                                                                                                                                                                                                                                                                                                                                                                                                                                                                                                                                                                                                                                                                                                                                                                                   |         |          |          |          |         |          |                                                                                                                                                        |                                                                                                                                                                                                                                                                                                                                                                                                                                                                                                                                                                                                                                                                                                                                                                                                                                                                                                                                                                                                                                                                                                                                                                                                                                                                                                                                                                                                                                                                                                                                                                                                                                                                                                                                                                                                                                                                                                                                                                                                                                                                             |   |          |          |          |   |          |          |          |   |          |          |          |   |          |          |          |   |          |          |          |   |          |          |          |   |          |          |          |   |          |          |          |   |          |          |         |   |          |          |         |   |          |          |          |   |          |          |          |   |          |          |          |   |          |          |          |   |          |          |          |   |          |          |          |   |          |          |          |   |          |          |          |    |          |          |          |    |          |          |          |   |          |          |          |   |          |          |          |   |          |          |          |   |          |          |          |   |          |          |         |   |          |          |         |   |          |          |         |   |          |          |         |
| H                                                                                                                                                       | -0.40316                                                                                                                                                                                                                                                                                                                                                                                                                                                                                                                                                                                                                                                                                                                                                                                                                                                                                                                                                                                                                                                                                                                                                                                                                                                                                                                                                                                                                                                                                                                                                                                                                                                                                                                                                                                                                                                                                                                                                                                                                                                               | -0.59101 | -0.92581 |          |          |   |          |          |          |   |          |          |          |   |          |         |          |   |          |         |          |   |          |          |          |   |          |          |          |   |          |         |          |   |          |          |         |   |          |          |         |   |          |          |         |   |          |          |         |   |          |         |         |   |          |          |         |   |          |          |         |   |          |          |          |   |          |          |         |   |          |          |          |    |          |          |          |    |          |          |         |   |          |          |          |   |          |          |          |   |          |          |          |   |          |          |          |   |          |         |          |   |          |          |          |                                                                                                                                                         |                                                                                                                                                                                                                                                                                                                                                                                                                                                                                                                                                                                                                                                                                                                                                                                                                                                                                                                                                                                                                                                                                                                                                                                                                                                                                                                                                                                                                                                                                                                                                                                                                                                                                                                                                                                                                                                                                                                                   |         |          |          |          |         |          |                                                                                                                                                        |                                                                                                                                                                                                                                                                                                                                                                                                                                                                                                                                                                                                                                                                                                                                                                                                                                                                                                                                                                                                                                                                                                                                                                                                                                                                                                                                                                                                                                                                                                                                                                                                                                                                                                                                                                                                                                                                                                                                                                                                                                                                             |   |          |          |          |   |          |          |          |   |          |          |          |   |          |          |          |   |          |          |          |   |          |          |          |   |          |          |          |   |          |          |          |   |          |          |         |   |          |          |         |   |          |          |          |   |          |          |          |   |          |          |          |   |          |          |          |   |          |          |          |   |          |          |          |   |          |          |          |   |          |          |          |    |          |          |          |    |          |          |          |   |          |          |          |   |          |          |          |   |          |          |          |   |          |          |          |   |          |          |         |   |          |          |         |   |          |          |         |   |          |          |         |
| C                                                                                                                                                       | -0.06752                                                                                                                                                                                                                                                                                                                                                                                                                                                                                                                                                                                                                                                                                                                                                                                                                                                                                                                                                                                                                                                                                                                                                                                                                                                                                                                                                                                                                                                                                                                                                                                                                                                                                                                                                                                                                                                                                                                                                                                                                                                               | -1.36423 | -2.67418 |          |          |   |          |          |          |   |          |          |          |   |          |         |          |   |          |         |          |   |          |          |          |   |          |          |          |   |          |         |          |   |          |          |         |   |          |          |         |   |          |          |         |   |          |          |         |   |          |         |         |   |          |          |         |   |          |          |         |   |          |          |          |   |          |          |         |   |          |          |          |    |          |          |          |    |          |          |         |   |          |          |          |   |          |          |          |   |          |          |          |   |          |          |          |   |          |         |          |   |          |          |          |                                                                                                                                                         |                                                                                                                                                                                                                                                                                                                                                                                                                                                                                                                                                                                                                                                                                                                                                                                                                                                                                                                                                                                                                                                                                                                                                                                                                                                                                                                                                                                                                                                                                                                                                                                                                                                                                                                                                                                                                                                                                                                                   |         |          |          |          |         |          |                                                                                                                                                        |                                                                                                                                                                                                                                                                                                                                                                                                                                                                                                                                                                                                                                                                                                                                                                                                                                                                                                                                                                                                                                                                                                                                                                                                                                                                                                                                                                                                                                                                                                                                                                                                                                                                                                                                                                                                                                                                                                                                                                                                                                                                             |   |          |          |          |   |          |          |          |   |          |          |          |   |          |          |          |   |          |          |          |   |          |          |          |   |          |          |          |   |          |          |          |   |          |          |         |   |          |          |         |   |          |          |          |   |          |          |          |   |          |          |          |   |          |          |          |   |          |          |          |   |          |          |          |   |          |          |          |   |          |          |          |    |          |          |          |    |          |          |          |   |          |          |          |   |          |          |          |   |          |          |          |   |          |          |          |   |          |          |         |   |          |          |         |   |          |          |         |   |          |          |         |
| C                                                                                                                                                       | 0.00066                                                                                                                                                                                                                                                                                                                                                                                                                                                                                                                                                                                                                                                                                                                                                                                                                                                                                                                                                                                                                                                                                                                                                                                                                                                                                                                                                                                                                                                                                                                                                                                                                                                                                                                                                                                                                                                                                                                                                                                                                                                                | -1.12109 | 0.16938  |          |          |   |          |          |          |   |          |          |          |   |          |         |          |   |          |         |          |   |          |          |          |   |          |          |          |   |          |         |          |   |          |          |         |   |          |          |         |   |          |          |         |   |          |          |         |   |          |         |         |   |          |          |         |   |          |          |         |   |          |          |          |   |          |          |         |   |          |          |          |    |          |          |          |    |          |          |         |   |          |          |          |   |          |          |          |   |          |          |          |   |          |          |          |   |          |         |          |   |          |          |          |                                                                                                                                                         |                                                                                                                                                                                                                                                                                                                                                                                                                                                                                                                                                                                                                                                                                                                                                                                                                                                                                                                                                                                                                                                                                                                                                                                                                                                                                                                                                                                                                                                                                                                                                                                                                                                                                                                                                                                                                                                                                                                                   |         |          |          |          |         |          |                                                                                                                                                        |                                                                                                                                                                                                                                                                                                                                                                                                                                                                                                                                                                                                                                                                                                                                                                                                                                                                                                                                                                                                                                                                                                                                                                                                                                                                                                                                                                                                                                                                                                                                                                                                                                                                                                                                                                                                                                                                                                                                                                                                                                                                             |   |          |          |          |   |          |          |          |   |          |          |          |   |          |          |          |   |          |          |          |   |          |          |          |   |          |          |          |   |          |          |          |   |          |          |         |   |          |          |         |   |          |          |          |   |          |          |          |   |          |          |          |   |          |          |          |   |          |          |          |   |          |          |          |   |          |          |          |   |          |          |          |    |          |          |          |    |          |          |          |   |          |          |          |   |          |          |          |   |          |          |          |   |          |          |          |   |          |          |         |   |          |          |         |   |          |          |         |   |          |          |         |
| C                                                                                                                                                       | -0.05895                                                                                                                                                                                                                                                                                                                                                                                                                                                                                                                                                                                                                                                                                                                                                                                                                                                                                                                                                                                                                                                                                                                                                                                                                                                                                                                                                                                                                                                                                                                                                                                                                                                                                                                                                                                                                                                                                                                                                                                                                                                               | -2.48449 | -1.86671 |          |          |   |          |          |          |   |          |          |          |   |          |         |          |   |          |         |          |   |          |          |          |   |          |          |          |   |          |         |          |   |          |          |         |   |          |          |         |   |          |          |         |   |          |          |         |   |          |         |         |   |          |          |         |   |          |          |         |   |          |          |          |   |          |          |         |   |          |          |          |    |          |          |          |    |          |          |         |   |          |          |          |   |          |          |          |   |          |          |          |   |          |          |          |   |          |         |          |   |          |          |          |                                                                                                                                                         |                                                                                                                                                                                                                                                                                                                                                                                                                                                                                                                                                                                                                                                                                                                                                                                                                                                                                                                                                                                                                                                                                                                                                                                                                                                                                                                                                                                                                                                                                                                                                                                                                                                                                                                                                                                                                                                                                                                                   |         |          |          |          |         |          |                                                                                                                                                        |                                                                                                                                                                                                                                                                                                                                                                                                                                                                                                                                                                                                                                                                                                                                                                                                                                                                                                                                                                                                                                                                                                                                                                                                                                                                                                                                                                                                                                                                                                                                                                                                                                                                                                                                                                                                                                                                                                                                                                                                                                                                             |   |          |          |          |   |          |          |          |   |          |          |          |   |          |          |          |   |          |          |          |   |          |          |          |   |          |          |          |   |          |          |          |   |          |          |         |   |          |          |         |   |          |          |          |   |          |          |          |   |          |          |          |   |          |          |          |   |          |          |          |   |          |          |          |   |          |          |          |   |          |          |          |    |          |          |          |    |          |          |          |   |          |          |          |   |          |          |          |   |          |          |          |   |          |          |          |   |          |          |         |   |          |          |         |   |          |          |         |   |          |          |         |
| C                                                                                                                                                       | -0.04331                                                                                                                                                                                                                                                                                                                                                                                                                                                                                                                                                                                                                                                                                                                                                                                                                                                                                                                                                                                                                                                                                                                                                                                                                                                                                                                                                                                                                                                                                                                                                                                                                                                                                                                                                                                                                                                                                                                                                                                                                                                               | -0.11980 | -2.07270 |          |          |   |          |          |          |   |          |          |          |   |          |         |          |   |          |         |          |   |          |          |          |   |          |          |          |   |          |         |          |   |          |          |         |   |          |          |         |   |          |          |         |   |          |          |         |   |          |         |         |   |          |          |         |   |          |          |         |   |          |          |          |   |          |          |         |   |          |          |          |    |          |          |          |    |          |          |         |   |          |          |          |   |          |          |          |   |          |          |          |   |          |          |          |   |          |         |          |   |          |          |          |                                                                                                                                                         |                                                                                                                                                                                                                                                                                                                                                                                                                                                                                                                                                                                                                                                                                                                                                                                                                                                                                                                                                                                                                                                                                                                                                                                                                                                                                                                                                                                                                                                                                                                                                                                                                                                                                                                                                                                                                                                                                                                                   |         |          |          |          |         |          |                                                                                                                                                        |                                                                                                                                                                                                                                                                                                                                                                                                                                                                                                                                                                                                                                                                                                                                                                                                                                                                                                                                                                                                                                                                                                                                                                                                                                                                                                                                                                                                                                                                                                                                                                                                                                                                                                                                                                                                                                                                                                                                                                                                                                                                             |   |          |          |          |   |          |          |          |   |          |          |          |   |          |          |          |   |          |          |          |   |          |          |          |   |          |          |          |   |          |          |          |   |          |          |         |   |          |          |         |   |          |          |          |   |          |          |          |   |          |          |          |   |          |          |          |   |          |          |          |   |          |          |          |   |          |          |          |   |          |          |          |    |          |          |          |    |          |          |          |   |          |          |          |   |          |          |          |   |          |          |          |   |          |          |          |   |          |          |         |   |          |          |         |   |          |          |         |   |          |          |         |
| C                                                                                                                                                       | -0.00758                                                                                                                                                                                                                                                                                                                                                                                                                                                                                                                                                                                                                                                                                                                                                                                                                                                                                                                                                                                                                                                                                                                                                                                                                                                                                                                                                                                                                                                                                                                                                                                                                                                                                                                                                                                                                                                                                                                                                                                                                                                               | -0.01314 | -0.69892 |          |          |   |          |          |          |   |          |          |          |   |          |         |          |   |          |         |          |   |          |          |          |   |          |          |          |   |          |         |          |   |          |          |         |   |          |          |         |   |          |          |         |   |          |          |         |   |          |         |         |   |          |          |         |   |          |          |         |   |          |          |          |   |          |          |         |   |          |          |          |    |          |          |          |    |          |          |         |   |          |          |          |   |          |          |          |   |          |          |          |   |          |          |          |   |          |         |          |   |          |          |          |                                                                                                                                                         |                                                                                                                                                                                                                                                                                                                                                                                                                                                                                                                                                                                                                                                                                                                                                                                                                                                                                                                                                                                                                                                                                                                                                                                                                                                                                                                                                                                                                                                                                                                                                                                                                                                                                                                                                                                                                                                                                                                                   |         |          |          |          |         |          |                                                                                                                                                        |                                                                                                                                                                                                                                                                                                                                                                                                                                                                                                                                                                                                                                                                                                                                                                                                                                                                                                                                                                                                                                                                                                                                                                                                                                                                                                                                                                                                                                                                                                                                                                                                                                                                                                                                                                                                                                                                                                                                                                                                                                                                             |   |          |          |          |   |          |          |          |   |          |          |          |   |          |          |          |   |          |          |          |   |          |          |          |   |          |          |          |   |          |          |          |   |          |          |         |   |          |          |         |   |          |          |          |   |          |          |          |   |          |          |          |   |          |          |          |   |          |          |          |   |          |          |          |   |          |          |          |   |          |          |          |    |          |          |          |    |          |          |          |   |          |          |          |   |          |          |          |   |          |          |          |   |          |          |          |   |          |          |         |   |          |          |         |   |          |          |         |   |          |          |         |
| C                                                                                                                                                       | -0.02925                                                                                                                                                                                                                                                                                                                                                                                                                                                                                                                                                                                                                                                                                                                                                                                                                                                                                                                                                                                                                                                                                                                                                                                                                                                                                                                                                                                                                                                                                                                                                                                                                                                                                                                                                                                                                                                                                                                                                                                                                                                               | -2.41158 | -0.46549 |          |          |   |          |          |          |   |          |          |          |   |          |         |          |   |          |         |          |   |          |          |          |   |          |          |          |   |          |         |          |   |          |          |         |   |          |          |         |   |          |          |         |   |          |          |         |   |          |         |         |   |          |          |         |   |          |          |         |   |          |          |          |   |          |          |         |   |          |          |          |    |          |          |          |    |          |          |         |   |          |          |          |   |          |          |          |   |          |          |          |   |          |          |          |   |          |         |          |   |          |          |          |                                                                                                                                                         |                                                                                                                                                                                                                                                                                                                                                                                                                                                                                                                                                                                                                                                                                                                                                                                                                                                                                                                                                                                                                                                                                                                                                                                                                                                                                                                                                                                                                                                                                                                                                                                                                                                                                                                                                                                                                                                                                                                                   |         |          |          |          |         |          |                                                                                                                                                        |                                                                                                                                                                                                                                                                                                                                                                                                                                                                                                                                                                                                                                                                                                                                                                                                                                                                                                                                                                                                                                                                                                                                                                                                                                                                                                                                                                                                                                                                                                                                                                                                                                                                                                                                                                                                                                                                                                                                                                                                                                                                             |   |          |          |          |   |          |          |          |   |          |          |          |   |          |          |          |   |          |          |          |   |          |          |          |   |          |          |          |   |          |          |          |   |          |          |         |   |          |          |         |   |          |          |          |   |          |          |          |   |          |          |          |   |          |          |          |   |          |          |          |   |          |          |          |   |          |          |          |   |          |          |          |    |          |          |          |    |          |          |          |   |          |          |          |   |          |          |          |   |          |          |          |   |          |          |          |   |          |          |         |   |          |          |         |   |          |          |         |   |          |          |         |
| H                                                                                                                                                       | -0.08450                                                                                                                                                                                                                                                                                                                                                                                                                                                                                                                                                                                                                                                                                                                                                                                                                                                                                                                                                                                                                                                                                                                                                                                                                                                                                                                                                                                                                                                                                                                                                                                                                                                                                                                                                                                                                                                                                                                                                                                                                                                               | -3.46518 | -2.32666 |          |          |   |          |          |          |   |          |          |          |   |          |         |          |   |          |         |          |   |          |          |          |   |          |          |          |   |          |         |          |   |          |          |         |   |          |          |         |   |          |          |         |   |          |          |         |   |          |         |         |   |          |          |         |   |          |          |         |   |          |          |          |   |          |          |         |   |          |          |          |    |          |          |          |    |          |          |         |   |          |          |          |   |          |          |          |   |          |          |          |   |          |          |          |   |          |         |          |   |          |          |          |                                                                                                                                                         |                                                                                                                                                                                                                                                                                                                                                                                                                                                                                                                                                                                                                                                                                                                                                                                                                                                                                                                                                                                                                                                                                                                                                                                                                                                                                                                                                                                                                                                                                                                                                                                                                                                                                                                                                                                                                                                                                                                                   |         |          |          |          |         |          |                                                                                                                                                        |                                                                                                                                                                                                                                                                                                                                                                                                                                                                                                                                                                                                                                                                                                                                                                                                                                                                                                                                                                                                                                                                                                                                                                                                                                                                                                                                                                                                                                                                                                                                                                                                                                                                                                                                                                                                                                                                                                                                                                                                                                                                             |   |          |          |          |   |          |          |          |   |          |          |          |   |          |          |          |   |          |          |          |   |          |          |          |   |          |          |          |   |          |          |          |   |          |          |         |   |          |          |         |   |          |          |          |   |          |          |          |   |          |          |          |   |          |          |          |   |          |          |          |   |          |          |          |   |          |          |          |   |          |          |          |    |          |          |          |    |          |          |          |   |          |          |          |   |          |          |          |   |          |          |          |   |          |          |          |   |          |          |         |   |          |          |         |   |          |          |         |   |          |          |         |
| H                                                                                                                                                       | 0.00711                                                                                                                                                                                                                                                                                                                                                                                                                                                                                                                                                                                                                                                                                                                                                                                                                                                                                                                                                                                                                                                                                                                                                                                                                                                                                                                                                                                                                                                                                                                                                                                                                                                                                                                                                                                                                                                                                                                                                                                                                                                                | 0.97611  | -0.29432 |          |          |   |          |          |          |   |          |          |          |   |          |         |          |   |          |         |          |   |          |          |          |   |          |          |          |   |          |         |          |   |          |          |         |   |          |          |         |   |          |          |         |   |          |          |         |   |          |         |         |   |          |          |         |   |          |          |         |   |          |          |          |   |          |          |         |   |          |          |          |    |          |          |          |    |          |          |         |   |          |          |          |   |          |          |          |   |          |          |          |   |          |          |          |   |          |         |          |   |          |          |          |                                                                                                                                                         |                                                                                                                                                                                                                                                                                                                                                                                                                                                                                                                                                                                                                                                                                                                                                                                                                                                                                                                                                                                                                                                                                                                                                                                                                                                                                                                                                                                                                                                                                                                                                                                                                                                                                                                                                                                                                                                                                                                                   |         |          |          |          |         |          |                                                                                                                                                        |                                                                                                                                                                                                                                                                                                                                                                                                                                                                                                                                                                                                                                                                                                                                                                                                                                                                                                                                                                                                                                                                                                                                                                                                                                                                                                                                                                                                                                                                                                                                                                                                                                                                                                                                                                                                                                                                                                                                                                                                                                                                             |   |          |          |          |   |          |          |          |   |          |          |          |   |          |          |          |   |          |          |          |   |          |          |          |   |          |          |          |   |          |          |          |   |          |          |         |   |          |          |         |   |          |          |          |   |          |          |          |   |          |          |          |   |          |          |          |   |          |          |          |   |          |          |          |   |          |          |          |   |          |          |          |    |          |          |          |    |          |          |          |   |          |          |          |   |          |          |          |   |          |          |          |   |          |          |          |   |          |          |         |   |          |          |         |   |          |          |         |   |          |          |         |
| C                                                                                                                                                       | 0.03620                                                                                                                                                                                                                                                                                                                                                                                                                                                                                                                                                                                                                                                                                                                                                                                                                                                                                                                                                                                                                                                                                                                                                                                                                                                                                                                                                                                                                                                                                                                                                                                                                                                                                                                                                                                                                                                                                                                                                                                                                                                                | -0.87085 | 1.65994  |          |          |   |          |          |          |   |          |          |          |   |          |         |          |   |          |         |          |   |          |          |          |   |          |          |          |   |          |         |          |   |          |          |         |   |          |          |         |   |          |          |         |   |          |          |         |   |          |         |         |   |          |          |         |   |          |          |         |   |          |          |          |   |          |          |         |   |          |          |          |    |          |          |          |    |          |          |         |   |          |          |          |   |          |          |          |   |          |          |          |   |          |          |          |   |          |         |          |   |          |          |          |                                                                                                                                                         |                                                                                                                                                                                                                                                                                                                                                                                                                                                                                                                                                                                                                                                                                                                                                                                                                                                                                                                                                                                                                                                                                                                                                                                                                                                                                                                                                                                                                                                                                                                                                                                                                                                                                                                                                                                                                                                                                                                                   |         |          |          |          |         |          |                                                                                                                                                        |                                                                                                                                                                                                                                                                                                                                                                                                                                                                                                                                                                                                                                                                                                                                                                                                                                                                                                                                                                                                                                                                                                                                                                                                                                                                                                                                                                                                                                                                                                                                                                                                                                                                                                                                                                                                                                                                                                                                                                                                                                                                             |   |          |          |          |   |          |          |          |   |          |          |          |   |          |          |          |   |          |          |          |   |          |          |          |   |          |          |          |   |          |          |          |   |          |          |         |   |          |          |         |   |          |          |          |   |          |          |          |   |          |          |          |   |          |          |          |   |          |          |          |   |          |          |          |   |          |          |          |   |          |          |          |    |          |          |          |    |          |          |          |   |          |          |          |   |          |          |          |   |          |          |          |   |          |          |          |   |          |          |         |   |          |          |         |   |          |          |         |   |          |          |         |
| C                                                                                                                                                       | 0.10290                                                                                                                                                                                                                                                                                                                                                                                                                                                                                                                                                                                                                                                                                                                                                                                                                                                                                                                                                                                                                                                                                                                                                                                                                                                                                                                                                                                                                                                                                                                                                                                                                                                                                                                                                                                                                                                                                                                                                                                                                                                                | -0.65959 | 4.54854  |          |          |   |          |          |          |   |          |          |          |   |          |         |          |   |          |         |          |   |          |          |          |   |          |          |          |   |          |         |          |   |          |          |         |   |          |          |         |   |          |          |         |   |          |          |         |   |          |         |         |   |          |          |         |   |          |          |         |   |          |          |          |   |          |          |         |   |          |          |          |    |          |          |          |    |          |          |         |   |          |          |          |   |          |          |          |   |          |          |          |   |          |          |          |   |          |         |          |   |          |          |          |                                                                                                                                                         |                                                                                                                                                                                                                                                                                                                                                                                                                                                                                                                                                                                                                                                                                                                                                                                                                                                                                                                                                                                                                                                                                                                                                                                                                                                                                                                                                                                                                                                                                                                                                                                                                                                                                                                                                                                                                                                                                                                                   |         |          |          |          |         |          |                                                                                                                                                        |                                                                                                                                                                                                                                                                                                                                                                                                                                                                                                                                                                                                                                                                                                                                                                                                                                                                                                                                                                                                                                                                                                                                                                                                                                                                                                                                                                                                                                                                                                                                                                                                                                                                                                                                                                                                                                                                                                                                                                                                                                                                             |   |          |          |          |   |          |          |          |   |          |          |          |   |          |          |          |   |          |          |          |   |          |          |          |   |          |          |          |   |          |          |          |   |          |          |         |   |          |          |         |   |          |          |          |   |          |          |          |   |          |          |          |   |          |          |          |   |          |          |          |   |          |          |          |   |          |          |          |   |          |          |          |    |          |          |          |    |          |          |          |   |          |          |          |   |          |          |          |   |          |          |          |   |          |          |          |   |          |          |         |   |          |          |         |   |          |          |         |   |          |          |         |
| C                                                                                                                                                       | 0.06703                                                                                                                                                                                                                                                                                                                                                                                                                                                                                                                                                                                                                                                                                                                                                                                                                                                                                                                                                                                                                                                                                                                                                                                                                                                                                                                                                                                                                                                                                                                                                                                                                                                                                                                                                                                                                                                                                                                                                                                                                                                                | 0.37918  | 2.35080  |          |          |   |          |          |          |   |          |          |          |   |          |         |          |   |          |         |          |   |          |          |          |   |          |          |          |   |          |         |          |   |          |          |         |   |          |          |         |   |          |          |         |   |          |          |         |   |          |         |         |   |          |          |         |   |          |          |         |   |          |          |          |   |          |          |         |   |          |          |          |    |          |          |          |    |          |          |         |   |          |          |          |   |          |          |          |   |          |          |          |   |          |          |          |   |          |         |          |   |          |          |          |                                                                                                                                                         |                                                                                                                                                                                                                                                                                                                                                                                                                                                                                                                                                                                                                                                                                                                                                                                                                                                                                                                                                                                                                                                                                                                                                                                                                                                                                                                                                                                                                                                                                                                                                                                                                                                                                                                                                                                                                                                                                                                                   |         |          |          |          |         |          |                                                                                                                                                        |                                                                                                                                                                                                                                                                                                                                                                                                                                                                                                                                                                                                                                                                                                                                                                                                                                                                                                                                                                                                                                                                                                                                                                                                                                                                                                                                                                                                                                                                                                                                                                                                                                                                                                                                                                                                                                                                                                                                                                                                                                                                             |   |          |          |          |   |          |          |          |   |          |          |          |   |          |          |          |   |          |          |          |   |          |          |          |   |          |          |          |   |          |          |          |   |          |          |         |   |          |          |         |   |          |          |          |   |          |          |          |   |          |          |          |   |          |          |          |   |          |          |          |   |          |          |          |   |          |          |          |   |          |          |          |    |          |          |          |    |          |          |          |   |          |          |          |   |          |          |          |   |          |          |          |   |          |          |          |   |          |          |         |   |          |          |         |   |          |          |         |   |          |          |         |
| C                                                                                                                                                       | 0.04454                                                                                                                                                                                                                                                                                                                                                                                                                                                                                                                                                                                                                                                                                                                                                                                                                                                                                                                                                                                                                                                                                                                                                                                                                                                                                                                                                                                                                                                                                                                                                                                                                                                                                                                                                                                                                                                                                                                                                                                                                                                                | -1.97134 | 2.54694  |          |          |   |          |          |          |   |          |          |          |   |          |         |          |   |          |         |          |   |          |          |          |   |          |          |          |   |          |         |          |   |          |          |         |   |          |          |         |   |          |          |         |   |          |          |         |   |          |         |         |   |          |          |         |   |          |          |         |   |          |          |          |   |          |          |         |   |          |          |          |    |          |          |          |    |          |          |         |   |          |          |          |   |          |          |          |   |          |          |          |   |          |          |          |   |          |         |          |   |          |          |          |                                                                                                                                                         |                                                                                                                                                                                                                                                                                                                                                                                                                                                                                                                                                                                                                                                                                                                                                                                                                                                                                                                                                                                                                                                                                                                                                                                                                                                                                                                                                                                                                                                                                                                                                                                                                                                                                                                                                                                                                                                                                                                                   |         |          |          |          |         |          |                                                                                                                                                        |                                                                                                                                                                                                                                                                                                                                                                                                                                                                                                                                                                                                                                                                                                                                                                                                                                                                                                                                                                                                                                                                                                                                                                                                                                                                                                                                                                                                                                                                                                                                                                                                                                                                                                                                                                                                                                                                                                                                                                                                                                                                             |   |          |          |          |   |          |          |          |   |          |          |          |   |          |          |          |   |          |          |          |   |          |          |          |   |          |          |          |   |          |          |          |   |          |          |         |   |          |          |         |   |          |          |          |   |          |          |          |   |          |          |          |   |          |          |          |   |          |          |          |   |          |          |          |   |          |          |          |   |          |          |          |    |          |          |          |    |          |          |          |   |          |          |          |   |          |          |          |   |          |          |          |   |          |          |          |   |          |          |         |   |          |          |         |   |          |          |         |   |          |          |         |
| C                                                                                                                                                       | 0.07590                                                                                                                                                                                                                                                                                                                                                                                                                                                                                                                                                                                                                                                                                                                                                                                                                                                                                                                                                                                                                                                                                                                                                                                                                                                                                                                                                                                                                                                                                                                                                                                                                                                                                                                                                                                                                                                                                                                                                                                                                                                                | -1.89511 | 3.92830  |          |          |   |          |          |          |   |          |          |          |   |          |         |          |   |          |         |          |   |          |          |          |   |          |          |          |   |          |         |          |   |          |          |         |   |          |          |         |   |          |          |         |   |          |          |         |   |          |         |         |   |          |          |         |   |          |          |         |   |          |          |          |   |          |          |         |   |          |          |          |    |          |          |          |    |          |          |         |   |          |          |          |   |          |          |          |   |          |          |          |   |          |          |          |   |          |         |          |   |          |          |          |                                                                                                                                                         |                                                                                                                                                                                                                                                                                                                                                                                                                                                                                                                                                                                                                                                                                                                                                                                                                                                                                                                                                                                                                                                                                                                                                                                                                                                                                                                                                                                                                                                                                                                                                                                                                                                                                                                                                                                                                                                                                                                                   |         |          |          |          |         |          |                                                                                                                                                        |                                                                                                                                                                                                                                                                                                                                                                                                                                                                                                                                                                                                                                                                                                                                                                                                                                                                                                                                                                                                                                                                                                                                                                                                                                                                                                                                                                                                                                                                                                                                                                                                                                                                                                                                                                                                                                                                                                                                                                                                                                                                             |   |          |          |          |   |          |          |          |   |          |          |          |   |          |          |          |   |          |          |          |   |          |          |          |   |          |          |          |   |          |          |          |   |          |          |         |   |          |          |         |   |          |          |          |   |          |          |          |   |          |          |          |   |          |          |          |   |          |          |          |   |          |          |          |   |          |          |          |   |          |          |          |    |          |          |          |    |          |          |          |   |          |          |          |   |          |          |          |   |          |          |          |   |          |          |          |   |          |          |         |   |          |          |         |   |          |          |         |   |          |          |         |
| C                                                                                                                                                       | 0.09855                                                                                                                                                                                                                                                                                                                                                                                                                                                                                                                                                                                                                                                                                                                                                                                                                                                                                                                                                                                                                                                                                                                                                                                                                                                                                                                                                                                                                                                                                                                                                                                                                                                                                                                                                                                                                                                                                                                                                                                                                                                                | 0.46546  | 3.74392  |          |          |   |          |          |          |   |          |          |          |   |          |         |          |   |          |         |          |   |          |          |          |   |          |          |          |   |          |         |          |   |          |          |         |   |          |          |         |   |          |          |         |   |          |          |         |   |          |         |         |   |          |          |         |   |          |          |         |   |          |          |          |   |          |          |         |   |          |          |          |    |          |          |          |    |          |          |         |   |          |          |          |   |          |          |          |   |          |          |          |   |          |          |          |   |          |         |          |   |          |          |          |                                                                                                                                                         |                                                                                                                                                                                                                                                                                                                                                                                                                                                                                                                                                                                                                                                                                                                                                                                                                                                                                                                                                                                                                                                                                                                                                                                                                                                                                                                                                                                                                                                                                                                                                                                                                                                                                                                                                                                                                                                                                                                                   |         |          |          |          |         |          |                                                                                                                                                        |                                                                                                                                                                                                                                                                                                                                                                                                                                                                                                                                                                                                                                                                                                                                                                                                                                                                                                                                                                                                                                                                                                                                                                                                                                                                                                                                                                                                                                                                                                                                                                                                                                                                                                                                                                                                                                                                                                                                                                                                                                                                             |   |          |          |          |   |          |          |          |   |          |          |          |   |          |          |          |   |          |          |          |   |          |          |          |   |          |          |          |   |          |          |          |   |          |          |         |   |          |          |         |   |          |          |          |   |          |          |          |   |          |          |          |   |          |          |          |   |          |          |          |   |          |          |          |   |          |          |          |   |          |          |          |    |          |          |          |    |          |          |          |   |          |          |          |   |          |          |          |   |          |          |          |   |          |          |          |   |          |          |         |   |          |          |         |   |          |          |         |   |          |          |         |
| H                                                                                                                                                       | 0.02621                                                                                                                                                                                                                                                                                                                                                                                                                                                                                                                                                                                                                                                                                                                                                                                                                                                                                                                                                                                                                                                                                                                                                                                                                                                                                                                                                                                                                                                                                                                                                                                                                                                                                                                                                                                                                                                                                                                                                                                                                                                                | -2.95629 | 2.14390  |          |          |   |          |          |          |   |          |          |          |   |          |         |          |   |          |         |          |   |          |          |          |   |          |          |          |   |          |         |          |   |          |          |         |   |          |          |         |   |          |          |         |   |          |          |         |   |          |         |         |   |          |          |         |   |          |          |         |   |          |          |          |   |          |          |         |   |          |          |          |    |          |          |          |    |          |          |         |   |          |          |          |   |          |          |          |   |          |          |          |   |          |          |          |   |          |         |          |   |          |          |          |                                                                                                                                                         |                                                                                                                                                                                                                                                                                                                                                                                                                                                                                                                                                                                                                                                                                                                                                                                                                                                                                                                                                                                                                                                                                                                                                                                                                                                                                                                                                                                                                                                                                                                                                                                                                                                                                                                                                                                                                                                                                                                                   |         |          |          |          |         |          |                                                                                                                                                        |                                                                                                                                                                                                                                                                                                                                                                                                                                                                                                                                                                                                                                                                                                                                                                                                                                                                                                                                                                                                                                                                                                                                                                                                                                                                                                                                                                                                                                                                                                                                                                                                                                                                                                                                                                                                                                                                                                                                                                                                                                                                             |   |          |          |          |   |          |          |          |   |          |          |          |   |          |          |          |   |          |          |          |   |          |          |          |   |          |          |          |   |          |          |          |   |          |          |         |   |          |          |         |   |          |          |          |   |          |          |          |   |          |          |          |   |          |          |          |   |          |          |          |   |          |          |          |   |          |          |          |   |          |          |          |    |          |          |          |    |          |          |          |   |          |          |          |   |          |          |          |   |          |          |          |   |          |          |          |   |          |          |         |   |          |          |         |   |          |          |         |   |          |          |         |
| H                                                                                                                                                       | 0.07892                                                                                                                                                                                                                                                                                                                                                                                                                                                                                                                                                                                                                                                                                                                                                                                                                                                                                                                                                                                                                                                                                                                                                                                                                                                                                                                                                                                                                                                                                                                                                                                                                                                                                                                                                                                                                                                                                                                                                                                                                                                                | -2.81049 | 4.50523  |          |          |   |          |          |          |   |          |          |          |   |          |         |          |   |          |         |          |   |          |          |          |   |          |          |          |   |          |         |          |   |          |          |         |   |          |          |         |   |          |          |         |   |          |          |         |   |          |         |         |   |          |          |         |   |          |          |         |   |          |          |          |   |          |          |         |   |          |          |          |    |          |          |          |    |          |          |         |   |          |          |          |   |          |          |          |   |          |          |          |   |          |          |          |   |          |         |          |   |          |          |          |                                                                                                                                                         |                                                                                                                                                                                                                                                                                                                                                                                                                                                                                                                                                                                                                                                                                                                                                                                                                                                                                                                                                                                                                                                                                                                                                                                                                                                                                                                                                                                                                                                                                                                                                                                                                                                                                                                                                                                                                                                                                                                                   |         |          |          |          |         |          |                                                                                                                                                        |                                                                                                                                                                                                                                                                                                                                                                                                                                                                                                                                                                                                                                                                                                                                                                                                                                                                                                                                                                                                                                                                                                                                                                                                                                                                                                                                                                                                                                                                                                                                                                                                                                                                                                                                                                                                                                                                                                                                                                                                                                                                             |   |          |          |          |   |          |          |          |   |          |          |          |   |          |          |          |   |          |          |          |   |          |          |          |   |          |          |          |   |          |          |          |   |          |          |         |   |          |          |         |   |          |          |          |   |          |          |          |   |          |          |          |   |          |          |          |   |          |          |          |   |          |          |          |   |          |          |          |   |          |          |          |    |          |          |          |    |          |          |          |   |          |          |          |   |          |          |          |   |          |          |          |   |          |          |          |   |          |          |         |   |          |          |         |   |          |          |         |   |          |          |         |
| H                                                                                                                                                       | 0.12043                                                                                                                                                                                                                                                                                                                                                                                                                                                                                                                                                                                                                                                                                                                                                                                                                                                                                                                                                                                                                                                                                                                                                                                                                                                                                                                                                                                                                                                                                                                                                                                                                                                                                                                                                                                                                                                                                                                                                                                                                                                                | 1.44183  | 4.20469  |          |          |   |          |          |          |   |          |          |          |   |          |         |          |   |          |         |          |   |          |          |          |   |          |          |          |   |          |         |          |   |          |          |         |   |          |          |         |   |          |          |         |   |          |          |         |   |          |         |         |   |          |          |         |   |          |          |         |   |          |          |          |   |          |          |         |   |          |          |          |    |          |          |          |    |          |          |         |   |          |          |          |   |          |          |          |   |          |          |          |   |          |          |          |   |          |         |          |   |          |          |          |                                                                                                                                                         |                                                                                                                                                                                                                                                                                                                                                                                                                                                                                                                                                                                                                                                                                                                                                                                                                                                                                                                                                                                                                                                                                                                                                                                                                                                                                                                                                                                                                                                                                                                                                                                                                                                                                                                                                                                                                                                                                                                                   |         |          |          |          |         |          |                                                                                                                                                        |                                                                                                                                                                                                                                                                                                                                                                                                                                                                                                                                                                                                                                                                                                                                                                                                                                                                                                                                                                                                                                                                                                                                                                                                                                                                                                                                                                                                                                                                                                                                                                                                                                                                                                                                                                                                                                                                                                                                                                                                                                                                             |   |          |          |          |   |          |          |          |   |          |          |          |   |          |          |          |   |          |          |          |   |          |          |          |   |          |          |          |   |          |          |          |   |          |          |         |   |          |          |         |   |          |          |          |   |          |          |          |   |          |          |          |   |          |          |          |   |          |          |          |   |          |          |          |   |          |          |          |   |          |          |          |    |          |          |          |    |          |          |          |   |          |          |          |   |          |          |          |   |          |          |          |   |          |          |          |   |          |          |         |   |          |          |         |   |          |          |         |   |          |          |         |
| H                                                                                                                                                       | 0.12742                                                                                                                                                                                                                                                                                                                                                                                                                                                                                                                                                                                                                                                                                                                                                                                                                                                                                                                                                                                                                                                                                                                                                                                                                                                                                                                                                                                                                                                                                                                                                                                                                                                                                                                                                                                                                                                                                                                                                                                                                                                                | -0.55924 | 5.62515  |          |          |   |          |          |          |   |          |          |          |   |          |         |          |   |          |         |          |   |          |          |          |   |          |          |          |   |          |         |          |   |          |          |         |   |          |          |         |   |          |          |         |   |          |          |         |   |          |         |         |   |          |          |         |   |          |          |         |   |          |          |          |   |          |          |         |   |          |          |          |    |          |          |          |    |          |          |         |   |          |          |          |   |          |          |          |   |          |          |          |   |          |          |          |   |          |         |          |   |          |          |          |                                                                                                                                                         |                                                                                                                                                                                                                                                                                                                                                                                                                                                                                                                                                                                                                                                                                                                                                                                                                                                                                                                                                                                                                                                                                                                                                                                                                                                                                                                                                                                                                                                                                                                                                                                                                                                                                                                                                                                                                                                                                                                                   |         |          |          |          |         |          |                                                                                                                                                        |                                                                                                                                                                                                                                                                                                                                                                                                                                                                                                                                                                                                                                                                                                                                                                                                                                                                                                                                                                                                                                                                                                                                                                                                                                                                                                                                                                                                                                                                                                                                                                                                                                                                                                                                                                                                                                                                                                                                                                                                                                                                             |   |          |          |          |   |          |          |          |   |          |          |          |   |          |          |          |   |          |          |          |   |          |          |          |   |          |          |          |   |          |          |          |   |          |          |         |   |          |          |         |   |          |          |          |   |          |          |          |   |          |          |          |   |          |          |          |   |          |          |          |   |          |          |          |   |          |          |          |   |          |          |          |    |          |          |          |    |          |          |          |   |          |          |          |   |          |          |          |   |          |          |          |   |          |          |          |   |          |          |         |   |          |          |         |   |          |          |         |   |          |          |         |
| C                                                                                                                                                       | -0.04127                                                                                                                                                                                                                                                                                                                                                                                                                                                                                                                                                                                                                                                                                                                                                                                                                                                                                                                                                                                                                                                                                                                                                                                                                                                                                                                                                                                                                                                                                                                                                                                                                                                                                                                                                                                                                                                                                                                                                                                                                                                               | -3.78079 | 0.19067  |          |          |   |          |          |          |   |          |          |          |   |          |         |          |   |          |         |          |   |          |          |          |   |          |          |          |   |          |         |          |   |          |          |         |   |          |          |         |   |          |          |         |   |          |          |         |   |          |         |         |   |          |          |         |   |          |          |         |   |          |          |          |   |          |          |         |   |          |          |          |    |          |          |          |    |          |          |         |   |          |          |          |   |          |          |          |   |          |          |          |   |          |          |          |   |          |         |          |   |          |          |          |                                                                                                                                                         |                                                                                                                                                                                                                                                                                                                                                                                                                                                                                                                                                                                                                                                                                                                                                                                                                                                                                                                                                                                                                                                                                                                                                                                                                                                                                                                                                                                                                                                                                                                                                                                                                                                                                                                                                                                                                                                                                                                                   |         |          |          |          |         |          |                                                                                                                                                        |                                                                                                                                                                                                                                                                                                                                                                                                                                                                                                                                                                                                                                                                                                                                                                                                                                                                                                                                                                                                                                                                                                                                                                                                                                                                                                                                                                                                                                                                                                                                                                                                                                                                                                                                                                                                                                                                                                                                                                                                                                                                             |   |          |          |          |   |          |          |          |   |          |          |          |   |          |          |          |   |          |          |          |   |          |          |          |   |          |          |          |   |          |          |          |   |          |          |         |   |          |          |         |   |          |          |          |   |          |          |          |   |          |          |          |   |          |          |          |   |          |          |          |   |          |          |          |   |          |          |          |   |          |          |          |    |          |          |          |    |          |          |          |   |          |          |          |   |          |          |          |   |          |          |          |   |          |          |          |   |          |          |         |   |          |          |         |   |          |          |         |   |          |          |         |
| H                                                                                                                                                       | -0.91596                                                                                                                                                                                                                                                                                                                                                                                                                                                                                                                                                                                                                                                                                                                                                                                                                                                                                                                                                                                                                                                                                                                                                                                                                                                                                                                                                                                                                                                                                                                                                                                                                                                                                                                                                                                                                                                                                                                                                                                                                                                               | -3.93457 | 0.82702  |          |          |   |          |          |          |   |          |          |          |   |          |         |          |   |          |         |          |   |          |          |          |   |          |          |          |   |          |         |          |   |          |          |         |   |          |          |         |   |          |          |         |   |          |          |         |   |          |         |         |   |          |          |         |   |          |          |         |   |          |          |          |   |          |          |         |   |          |          |          |    |          |          |          |    |          |          |         |   |          |          |          |   |          |          |          |   |          |          |          |   |          |          |          |   |          |         |          |   |          |          |          |                                                                                                                                                         |                                                                                                                                                                                                                                                                                                                                                                                                                                                                                                                                                                                                                                                                                                                                                                                                                                                                                                                                                                                                                                                                                                                                                                                                                                                                                                                                                                                                                                                                                                                                                                                                                                                                                                                                                                                                                                                                                                                                   |         |          |          |          |         |          |                                                                                                                                                        |                                                                                                                                                                                                                                                                                                                                                                                                                                                                                                                                                                                                                                                                                                                                                                                                                                                                                                                                                                                                                                                                                                                                                                                                                                                                                                                                                                                                                                                                                                                                                                                                                                                                                                                                                                                                                                                                                                                                                                                                                                                                             |   |          |          |          |   |          |          |          |   |          |          |          |   |          |          |          |   |          |          |          |   |          |          |          |   |          |          |          |   |          |          |          |   |          |          |         |   |          |          |         |   |          |          |          |   |          |          |          |   |          |          |          |   |          |          |          |   |          |          |          |   |          |          |          |   |          |          |          |   |          |          |          |    |          |          |          |    |          |          |          |   |          |          |          |   |          |          |          |   |          |          |          |   |          |          |          |   |          |          |         |   |          |          |         |   |          |          |         |   |          |          |         |
| H                                                                                                                                                       | 0.85532                                                                                                                                                                                                                                                                                                                                                                                                                                                                                                                                                                                                                                                                                                                                                                                                                                                                                                                                                                                                                                                                                                                                                                                                                                                                                                                                                                                                                                                                                                                                                                                                                                                                                                                                                                                                                                                                                                                                                                                                                                                                | -3.96995 | 0.78573  |          |          |   |          |          |          |   |          |          |          |   |          |         |          |   |          |         |          |   |          |          |          |   |          |          |          |   |          |         |          |   |          |          |         |   |          |          |         |   |          |          |         |   |          |          |         |   |          |         |         |   |          |          |         |   |          |          |         |   |          |          |          |   |          |          |         |   |          |          |          |    |          |          |          |    |          |          |         |   |          |          |          |   |          |          |          |   |          |          |          |   |          |          |          |   |          |         |          |   |          |          |          |                                                                                                                                                         |                                                                                                                                                                                                                                                                                                                                                                                                                                                                                                                                                                                                                                                                                                                                                                                                                                                                                                                                                                                                                                                                                                                                                                                                                                                                                                                                                                                                                                                                                                                                                                                                                                                                                                                                                                                                                                                                                                                                   |         |          |          |          |         |          |                                                                                                                                                        |                                                                                                                                                                                                                                                                                                                                                                                                                                                                                                                                                                                                                                                                                                                                                                                                                                                                                                                                                                                                                                                                                                                                                                                                                                                                                                                                                                                                                                                                                                                                                                                                                                                                                                                                                                                                                                                                                                                                                                                                                                                                             |   |          |          |          |   |          |          |          |   |          |          |          |   |          |          |          |   |          |          |          |   |          |          |          |   |          |          |          |   |          |          |          |   |          |          |         |   |          |          |         |   |          |          |          |   |          |          |          |   |          |          |          |   |          |          |          |   |          |          |          |   |          |          |          |   |          |          |          |   |          |          |          |    |          |          |          |    |          |          |          |   |          |          |          |   |          |          |          |   |          |          |          |   |          |          |          |   |          |          |         |   |          |          |         |   |          |          |         |   |          |          |         |
| H                                                                                                                                                       | -0.07431                                                                                                                                                                                                                                                                                                                                                                                                                                                                                                                                                                                                                                                                                                                                                                                                                                                                                                                                                                                                                                                                                                                                                                                                                                                                                                                                                                                                                                                                                                                                                                                                                                                                                                                                                                                                                                                                                                                                                                                                                                                               | -4.54958 | -0.58093 |          |          |   |          |          |          |   |          |          |          |   |          |         |          |   |          |         |          |   |          |          |          |   |          |          |          |   |          |         |          |   |          |          |         |   |          |          |         |   |          |          |         |   |          |          |         |   |          |         |         |   |          |          |         |   |          |          |         |   |          |          |          |   |          |          |         |   |          |          |          |    |          |          |          |    |          |          |         |   |          |          |          |   |          |          |          |   |          |          |          |   |          |          |          |   |          |         |          |   |          |          |          |                                                                                                                                                         |                                                                                                                                                                                                                                                                                                                                                                                                                                                                                                                                                                                                                                                                                                                                                                                                                                                                                                                                                                                                                                                                                                                                                                                                                                                                                                                                                                                                                                                                                                                                                                                                                                                                                                                                                                                                                                                                                                                                   |         |          |          |          |         |          |                                                                                                                                                        |                                                                                                                                                                                                                                                                                                                                                                                                                                                                                                                                                                                                                                                                                                                                                                                                                                                                                                                                                                                                                                                                                                                                                                                                                                                                                                                                                                                                                                                                                                                                                                                                                                                                                                                                                                                                                                                                                                                                                                                                                                                                             |   |          |          |          |   |          |          |          |   |          |          |          |   |          |          |          |   |          |          |          |   |          |          |          |   |          |          |          |   |          |          |          |   |          |          |         |   |          |          |         |   |          |          |          |   |          |          |          |   |          |          |          |   |          |          |          |   |          |          |          |   |          |          |          |   |          |          |          |   |          |          |          |    |          |          |          |    |          |          |          |   |          |          |          |   |          |          |          |   |          |          |          |   |          |          |          |   |          |          |         |   |          |          |         |   |          |          |         |   |          |          |         |
| C                                                                                                                                                       | -0.01550                                                                                                                                                                                                                                                                                                                                                                                                                                                                                                                                                                                                                                                                                                                                                                                                                                                                                                                                                                                                                                                                                                                                                                                                                                                                                                                                                                                                                                                                                                                                                                                                                                                                                                                                                                                                                                                                                                                                                                                                                                                               | 0.99347  | -3.10099 |          |          |   |          |          |          |   |          |          |          |   |          |         |          |   |          |         |          |   |          |          |          |   |          |          |          |   |          |         |          |   |          |          |         |   |          |          |         |   |          |          |         |   |          |          |         |   |          |         |         |   |          |          |         |   |          |          |         |   |          |          |          |   |          |          |         |   |          |          |          |    |          |          |          |    |          |          |         |   |          |          |          |   |          |          |          |   |          |          |          |   |          |          |          |   |          |         |          |   |          |          |          |                                                                                                                                                         |                                                                                                                                                                                                                                                                                                                                                                                                                                                                                                                                                                                                                                                                                                                                                                                                                                                                                                                                                                                                                                                                                                                                                                                                                                                                                                                                                                                                                                                                                                                                                                                                                                                                                                                                                                                                                                                                                                                                   |         |          |          |          |         |          |                                                                                                                                                        |                                                                                                                                                                                                                                                                                                                                                                                                                                                                                                                                                                                                                                                                                                                                                                                                                                                                                                                                                                                                                                                                                                                                                                                                                                                                                                                                                                                                                                                                                                                                                                                                                                                                                                                                                                                                                                                                                                                                                                                                                                                                             |   |          |          |          |   |          |          |          |   |          |          |          |   |          |          |          |   |          |          |          |   |          |          |          |   |          |          |          |   |          |          |          |   |          |          |         |   |          |          |         |   |          |          |          |   |          |          |          |   |          |          |          |   |          |          |          |   |          |          |          |   |          |          |          |   |          |          |          |   |          |          |          |    |          |          |          |    |          |          |          |   |          |          |          |   |          |          |          |   |          |          |          |   |          |          |          |   |          |          |         |   |          |          |         |   |          |          |         |   |          |          |         |
| C                                                                                                                                                       | -0.08752                                                                                                                                                                                                                                                                                                                                                                                                                                                                                                                                                                                                                                                                                                                                                                                                                                                                                                                                                                                                                                                                                                                                                                                                                                                                                                                                                                                                                                                                                                                                                                                                                                                                                                                                                                                                                                                                                                                                                                                                                                                               | -1.23165 | -4.17520 |          |          |   |          |          |          |   |          |          |          |   |          |         |          |   |          |         |          |   |          |          |          |   |          |          |          |   |          |         |          |   |          |          |         |   |          |          |         |   |          |          |         |   |          |          |         |   |          |         |         |   |          |          |         |   |          |          |         |   |          |          |          |   |          |          |         |   |          |          |          |    |          |          |          |    |          |          |         |   |          |          |          |   |          |          |          |   |          |          |          |   |          |          |          |   |          |         |          |   |          |          |          |                                                                                                                                                         |                                                                                                                                                                                                                                                                                                                                                                                                                                                                                                                                                                                                                                                                                                                                                                                                                                                                                                                                                                                                                                                                                                                                                                                                                                                                                                                                                                                                                                                                                                                                                                                                                                                                                                                                                                                                                                                                                                                                   |         |          |          |          |         |          |                                                                                                                                                        |                                                                                                                                                                                                                                                                                                                                                                                                                                                                                                                                                                                                                                                                                                                                                                                                                                                                                                                                                                                                                                                                                                                                                                                                                                                                                                                                                                                                                                                                                                                                                                                                                                                                                                                                                                                                                                                                                                                                                                                                                                                                             |   |          |          |          |   |          |          |          |   |          |          |          |   |          |          |          |   |          |          |          |   |          |          |          |   |          |          |          |   |          |          |          |   |          |          |         |   |          |          |         |   |          |          |          |   |          |          |          |   |          |          |          |   |          |          |          |   |          |          |          |   |          |          |          |   |          |          |          |   |          |          |          |    |          |          |          |    |          |          |          |   |          |          |          |   |          |          |          |   |          |          |          |   |          |          |          |   |          |          |         |   |          |          |         |   |          |          |         |   |          |          |         |
| H                                                                                                                                                       | 0.91200                                                                                                                                                                                                                                                                                                                                                                                                                                                                                                                                                                                                                                                                                                                                                                                                                                                                                                                                                                                                                                                                                                                                                                                                                                                                                                                                                                                                                                                                                                                                                                                                                                                                                                                                                                                                                                                                                                                                                                                                                                                                | -1.41356 | -4.58417 |          |          |   |          |          |          |   |          |          |          |   |          |         |          |   |          |         |          |   |          |          |          |   |          |          |          |   |          |         |          |   |          |          |         |   |          |          |         |   |          |          |         |   |          |          |         |   |          |         |         |   |          |          |         |   |          |          |         |   |          |          |          |   |          |          |         |   |          |          |          |    |          |          |          |    |          |          |         |   |          |          |          |   |          |          |          |   |          |          |          |   |          |          |          |   |          |         |          |   |          |          |          |                                                                                                                                                         |                                                                                                                                                                                                                                                                                                                                                                                                                                                                                                                                                                                                                                                                                                                                                                                                                                                                                                                                                                                                                                                                                                                                                                                                                                                                                                                                                                                                                                                                                                                                                                                                                                                                                                                                                                                                                                                                                                                                   |         |          |          |          |         |          |                                                                                                                                                        |                                                                                                                                                                                                                                                                                                                                                                                                                                                                                                                                                                                                                                                                                                                                                                                                                                                                                                                                                                                                                                                                                                                                                                                                                                                                                                                                                                                                                                                                                                                                                                                                                                                                                                                                                                                                                                                                                                                                                                                                                                                                             |   |          |          |          |   |          |          |          |   |          |          |          |   |          |          |          |   |          |          |          |   |          |          |          |   |          |          |          |   |          |          |          |   |          |          |         |   |          |          |         |   |          |          |          |   |          |          |          |   |          |          |          |   |          |          |          |   |          |          |          |   |          |          |          |   |          |          |          |   |          |          |          |    |          |          |          |    |          |          |          |   |          |          |          |   |          |          |          |   |          |          |          |   |          |          |          |   |          |          |         |   |          |          |         |   |          |          |         |   |          |          |         |
| H                                                                                                                                                       | -0.76689                                                                                                                                                                                                                                                                                                                                                                                                                                                                                                                                                                                                                                                                                                                                                                                                                                                                                                                                                                                                                                                                                                                                                                                                                                                                                                                                                                                                                                                                                                                                                                                                                                                                                                                                                                                                                                                                                                                                                                                                                                                               | -1.93379 | -4.66186 |          |          |   |          |          |          |   |          |          |          |   |          |         |          |   |          |         |          |   |          |          |          |   |          |          |          |   |          |         |          |   |          |          |         |   |          |          |         |   |          |          |         |   |          |          |         |   |          |         |         |   |          |          |         |   |          |          |         |   |          |          |          |   |          |          |         |   |          |          |          |    |          |          |          |    |          |          |         |   |          |          |          |   |          |          |          |   |          |          |          |   |          |          |          |   |          |         |          |   |          |          |          |                                                                                                                                                         |                                                                                                                                                                                                                                                                                                                                                                                                                                                                                                                                                                                                                                                                                                                                                                                                                                                                                                                                                                                                                                                                                                                                                                                                                                                                                                                                                                                                                                                                                                                                                                                                                                                                                                                                                                                                                                                                                                                                   |         |          |          |          |         |          |                                                                                                                                                        |                                                                                                                                                                                                                                                                                                                                                                                                                                                                                                                                                                                                                                                                                                                                                                                                                                                                                                                                                                                                                                                                                                                                                                                                                                                                                                                                                                                                                                                                                                                                                                                                                                                                                                                                                                                                                                                                                                                                                                                                                                                                             |   |          |          |          |   |          |          |          |   |          |          |          |   |          |          |          |   |          |          |          |   |          |          |          |   |          |          |          |   |          |          |          |   |          |          |         |   |          |          |         |   |          |          |          |   |          |          |          |   |          |          |          |   |          |          |          |   |          |          |          |   |          |          |          |   |          |          |          |   |          |          |          |    |          |          |          |    |          |          |          |   |          |          |          |   |          |          |          |   |          |          |          |   |          |          |          |   |          |          |         |   |          |          |         |   |          |          |         |   |          |          |         |

|                                                                                                                                                                                                                        |                                                                                                                                                                                                                                                                                                                                                                                                                                                                                                                                                                                                                                                                                                                                                                                                                                                                                                                                                                                                                                                                                                                                                                                                                                                                                                                                                                                                                                                                                                                                                                                                                                                                                                                                                                                                                                                                                                                                                                                                                                                                                                                                                                                                                               |                                                                                                                                                                                                                         |                                                                                                                                                                                                                                                                                                                                                                                                                                                                                                                                                                                                                                                                                                                                                                                                                                                                                                                                                                                                                                                                                                                                                                                                                                                                                                                                                                                                                                                                                                                                                                                                                                                                                                                                                                                                                                                                                                                                                                                                                                                                                                                                                                                                                            |
|------------------------------------------------------------------------------------------------------------------------------------------------------------------------------------------------------------------------|-------------------------------------------------------------------------------------------------------------------------------------------------------------------------------------------------------------------------------------------------------------------------------------------------------------------------------------------------------------------------------------------------------------------------------------------------------------------------------------------------------------------------------------------------------------------------------------------------------------------------------------------------------------------------------------------------------------------------------------------------------------------------------------------------------------------------------------------------------------------------------------------------------------------------------------------------------------------------------------------------------------------------------------------------------------------------------------------------------------------------------------------------------------------------------------------------------------------------------------------------------------------------------------------------------------------------------------------------------------------------------------------------------------------------------------------------------------------------------------------------------------------------------------------------------------------------------------------------------------------------------------------------------------------------------------------------------------------------------------------------------------------------------------------------------------------------------------------------------------------------------------------------------------------------------------------------------------------------------------------------------------------------------------------------------------------------------------------------------------------------------------------------------------------------------------------------------------------------------|-------------------------------------------------------------------------------------------------------------------------------------------------------------------------------------------------------------------------|----------------------------------------------------------------------------------------------------------------------------------------------------------------------------------------------------------------------------------------------------------------------------------------------------------------------------------------------------------------------------------------------------------------------------------------------------------------------------------------------------------------------------------------------------------------------------------------------------------------------------------------------------------------------------------------------------------------------------------------------------------------------------------------------------------------------------------------------------------------------------------------------------------------------------------------------------------------------------------------------------------------------------------------------------------------------------------------------------------------------------------------------------------------------------------------------------------------------------------------------------------------------------------------------------------------------------------------------------------------------------------------------------------------------------------------------------------------------------------------------------------------------------------------------------------------------------------------------------------------------------------------------------------------------------------------------------------------------------------------------------------------------------------------------------------------------------------------------------------------------------------------------------------------------------------------------------------------------------------------------------------------------------------------------------------------------------------------------------------------------------------------------------------------------------------------------------------------------------|
|                                                                                                                                                                                                                        | <p>C -0.62828 1.55644 -0.45390<br/>                     H -1.70508 1.37886 -0.51101<br/>                     H -0.33651 2.14688 -1.32402<br/>                     C -1.43724 3.22598 1.30914<br/>                     H -1.20366 3.69852 2.26634<br/>                     H -2.37687 2.67969 1.41516<br/>                     H -1.57703 4.01791 0.56878<br/>                     C 1.00382 3.07418 0.75881<br/>                     H 1.81392 2.42605 0.41771<br/>                     H 1.28903 3.49093 1.72709<br/>                     H 0.89077 3.89514 0.04571<br/>                     Br 3.00976 -0.07491 5.36800</p>                                                                                                                                                                                                                                                                                                                                                                                                                                                                                                                                                                                                                                                                                                                                                                                                                                                                                                                                                                                                                                                                                                                                                                                                                                                                                                                                                                                                                                                                                                                                                                                                 |                                                                                                                                                                                                                         | <p>C -0.50672 0.24430 -4.37021<br/>                     H -1.59716 0.30124 -4.41226<br/>                     H -0.11002 0.68534 -5.28602<br/>                     C -0.90934 2.17597 -2.73390<br/>                     H -0.56393 2.65022 -1.81214<br/>                     H -1.94037 1.84892 -2.58447<br/>                     H -0.89333 2.92714 -3.52777<br/>                     C 1.43282 1.47570 -3.28816<br/>                     H 2.08316 0.64887 -3.58247<br/>                     H 1.81759 1.89518 -2.35622<br/>                     H 1.47851 2.24641 -4.06218<br/>                     Br 0.07578 2.18563 1.61956</p>                                                                                                                                                                                                                                                                                                                                                                                                                                                                                                                                                                                                                                                                                                                                                                                                                                                                                                                                                                                                                                                                                                                                                                                                                                                                                                                                                                                                                                                                                                                                                                                       |
| 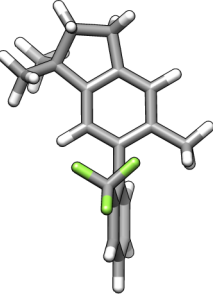 <p><b>4b</b><br/>                     -1034.903276<br/>                     -1034.733099<br/>                     -1035.609387</p>   | <p>C -1.05725 -1.52826 -1.42782<br/>                     C -0.52496 -0.81061 1.20290<br/>                     C -1.62609 -2.24987 -0.38916<br/>                     C -0.22151 -0.44904 -1.15671<br/>                     C 0.04256 -0.08643 0.15337<br/>                     C -1.36562 -1.90398 0.93870<br/>                     H -2.26572 -3.10064 -0.59533<br/>                     H 0.70289 0.74203 0.37559<br/>                     C -0.24646 -0.39940 2.60836<br/>                     C 0.17669 0.44885 5.25416<br/>                     C 0.92024 -0.75888 3.30004<br/>                     C -1.19044 0.38181 3.27628<br/>                     C -0.98694 0.80606 4.58380<br/>                     C 1.12722 -0.33329 4.61096<br/>                     H -2.09423 0.65863 2.74948<br/>                     H -1.73460 1.41482 5.07550<br/>                     H 2.03132 -0.61823 5.12843<br/>                     H 0.34624 0.77402 6.27177<br/>                     C 0.26399 0.20719 -2.43447<br/>                     C -1.19873 -1.71954 -2.91802<br/>                     H -1.17878 -2.76844 -3.21891<br/>                     H -2.14971 -1.30177 -3.26516<br/>                     C -0.00467 -0.91339 -3.47432<br/>                     H -0.18413 -0.51135 -4.47285<br/>                     H 0.87165 -1.56417 -3.52353<br/>                     C -0.60454 1.43955 -2.73865<br/>                     H -0.50524 2.18225 -1.94398<br/>                     H -1.65834 1.16271 -2.81521<br/>                     H -0.29585 1.89738 -3.68226<br/>                     C 1.73561 0.61205 -2.38103<br/>                     H 2.36404 -0.24816 -2.14235<br/>                     H 1.90056 1.37831 -1.61966<br/>                     H 2.05324 1.02049 -3.34390<br/>                     C -1.94454 -2.71991 2.06455<br/>                     H -2.56602 -3.52748 1.67634<br/>                     H -2.55308 -2.10617 2.73279<br/>                     H -1.14849 -3.15797 2.67199<br/>                     C 1.96762 -1.61364 2.62758<br/>                     F 1.44946 -2.76121 2.13687<br/>                     F 2.96090 -1.97088 3.46981<br/>                     F 2.55621 -0.97478 1.59077</p> |  <p><b>4b</b><br/>                     -1034.870933<br/>                     -1034.700039<br/>                     -1035.579271</p>   | <p>C -0.11836 -1.32552 -2.63806<br/>                     C -0.03196 -1.03264 0.20231<br/>                     C -0.08581 -2.43169 -1.81312<br/>                     C -0.04008 -0.07267 -2.05805<br/>                     C 0.01332 0.05774 -0.68776<br/>                     C -0.02317 -2.33367 -0.41449<br/>                     H -0.09334 -3.42078 -2.25549<br/>                     H 0.10668 1.05495 -0.32940<br/>                     C -0.04357 -0.77385 1.69275<br/>                     C 0.23874 -0.59979 4.55815<br/>                     C 0.01601 0.49178 2.37935<br/>                     C -0.10838 -1.87697 2.56503<br/>                     C 0.02917 -1.81711 3.94284<br/>                     C 0.19632 0.53459 3.76568<br/>                     H -0.28552 -2.84708 2.16362<br/>                     H -0.02516 -2.73284 4.51721<br/>                     H 0.27820 1.49370 4.25013<br/>                     H 0.38574 -0.51562 5.62599<br/>                     C 0.02600 1.02095 -3.10551<br/>                     C -0.16033 -1.21660 -4.14046<br/>                     H 0.82199 -1.45153 -4.56360<br/>                     H -0.87968 -1.89542 -4.60208<br/>                     C -0.51643 0.27327 -4.35445<br/>                     H -1.60361 0.37861 -4.38235<br/>                     H -0.11389 0.68084 -5.28302<br/>                     C -0.80738 2.25013 -2.74908<br/>                     H -0.42805 2.72691 -1.84249<br/>                     H -1.84969 1.97367 -2.57813<br/>                     H -0.76888 2.98366 -3.55846<br/>                     C 1.49277 1.43123 -3.31828<br/>                     H 2.10028 0.57001 -3.60551<br/>                     H 1.90821 1.84889 -2.39872<br/>                     H 1.56451 2.18568 -4.10613<br/>                     C 0.11434 -3.69034 0.25550<br/>                     H 0.95565 -3.72570 0.94967<br/>                     H 0.29634 -4.44773 -0.50671<br/>                     H -0.78706 -3.99923 0.79245<br/>                     C -0.19077 1.87946 1.78446<br/>                     F -1.29445 1.94790 1.00624<br/>                     F 0.86513 2.32093 1.04963<br/>                     F -0.37202 2.82885 2.72819</p> |
|  <p><b>4c</b><br/>                     -1157.390714<br/>                     -1157.351666<br/>                     -1158.023236</p> | <p>C 0.15284 -0.05721 1.12010<br/>                     C 0.15973 -0.07490 3.90109<br/>                     C 0.41058 -1.23709 1.80153<br/>                     C -0.11064 1.11486 1.82280<br/>                     C -0.10947 1.10812 3.20789<br/>                     C 0.41694 -1.26442 3.19837<br/>                     H 0.59718 -2.15628 1.25756<br/>                     H -0.31338 2.01382 3.76618<br/>                     C 0.12315 -0.05567 5.38712<br/>                     C -0.04015 -0.00984 8.19689<br/>                     C 1.27000 -0.12519 6.18428<br/>                     C -1.10740 0.05129 6.04360<br/>                     C -1.19731 0.07363 7.42965<br/>                     C 1.19760 -0.10591 7.57351<br/>                     H -2.00327 0.10967 5.43930<br/>                     H -2.16492 0.15309 7.90712<br/>                     H 2.10721 -0.15847 8.15500<br/>                     H -0.09473 0.00439 9.27738<br/>                     C 0.67599 -2.55739 3.92620<br/>                     H -0.07392 -2.73224 4.70088<br/>                     H 1.65021 -2.54079 4.42086<br/>                     H 0.66101 -3.39873 3.23230<br/>                     C -0.32333 2.28467 0.88147<br/>                     C 0.11250 0.20209 -0.36602<br/>                     H 1.12967 0.28942 -0.76233<br/>                     H -0.38409 -0.59179 -0.92674<br/>                     C -0.63196 1.55246 -0.45167<br/>                     H -1.70684 1.36346 -0.50848<br/>                     H -0.34694 2.14717 -1.32113</p>                                                                                                                                                                                                                                                                                                                                                                                                                                                                                                                                                                                                                                                                      |  <p><b>4c</b><br/>                     -1157.363676<br/>                     -1157.324577<br/>                     -1157.998128</p> | <p>C -0.06632 -1.26662 -2.36665<br/>                     C -0.00014 -0.74028 0.43830<br/>                     C -0.05470 -2.30058 -1.45151<br/>                     C -0.04639 0.03204 -1.89281<br/>                     C -0.01169 0.27781 -0.53668<br/>                     C -0.02570 -2.08720 -0.06486<br/>                     H -0.07685 -3.32258 -1.81074<br/>                     H -0.00008 1.30223 -0.23171<br/>                     C 0.03419 -0.34721 1.89723<br/>                     C 0.09928 0.17141 4.74644<br/>                     C 0.06251 0.96882 2.45153<br/>                     C 0.04401 -1.34815 2.89471<br/>                     C 0.07500 -1.12380 4.26038<br/>                     C 0.09292 1.20377 3.82712<br/>                     H 0.02716 -2.37107 2.60013<br/>                     H 0.07979 -1.97210 4.93204<br/>                     H 0.11246 2.22790 4.17047<br/>                     H 0.12333 0.38393 5.80663<br/>                     C -0.03313 -3.38238 0.72687<br/>                     H -0.90784 -3.47362 1.37507<br/>                     H 0.86346 -3.50596 1.33889<br/>                     H -0.06240 -4.22586 0.03748<br/>                     C -0.02040 1.03594 -3.02869<br/>                     C -0.08528 -1.28586 -3.87333<br/>                     H 0.91512 -1.50496 -4.26140<br/>                     H -0.76208 -2.03550 -4.28725<br/>                     C -0.50884 0.16149 -4.21612<br/>                     H -1.59942 0.21047 -4.26371<br/>                     H -0.11323 0.50957 -5.17159</p>                                                                                                                                                                                                                                                                                                                                                                                                                                                                                                                                                                                                                                                       |

|                                                                                                                                                                                                                        |                                                                                                                                                                                                                                                                                                                                                                                                                                                                                                                                                                                                                                                                                                                                                                                                                                                                                                                                                                                                                                                                                                                                                                                                                                                                                                                                                                                                                                                                                                                                                                                                                                                                                                                                                                                                                                                                                                                                                                                                                                                                                                                                                                          |                                                                                                                                                                                                                         |                                                                                                                                                                                                                                                                                                                                                                                                                                                                                                                                                                                                                                                                                                                                                                                                                                                                                                                                                                                                                                                                                                                                                                                                                                                                                                                                                                                                                                                                                                                                                                                                                                                                                                                                                                                                                                                                                                                                                                                                                                                                                                                                                                         |
|------------------------------------------------------------------------------------------------------------------------------------------------------------------------------------------------------------------------|--------------------------------------------------------------------------------------------------------------------------------------------------------------------------------------------------------------------------------------------------------------------------------------------------------------------------------------------------------------------------------------------------------------------------------------------------------------------------------------------------------------------------------------------------------------------------------------------------------------------------------------------------------------------------------------------------------------------------------------------------------------------------------------------------------------------------------------------------------------------------------------------------------------------------------------------------------------------------------------------------------------------------------------------------------------------------------------------------------------------------------------------------------------------------------------------------------------------------------------------------------------------------------------------------------------------------------------------------------------------------------------------------------------------------------------------------------------------------------------------------------------------------------------------------------------------------------------------------------------------------------------------------------------------------------------------------------------------------------------------------------------------------------------------------------------------------------------------------------------------------------------------------------------------------------------------------------------------------------------------------------------------------------------------------------------------------------------------------------------------------------------------------------------------------|-------------------------------------------------------------------------------------------------------------------------------------------------------------------------------------------------------------------------|-------------------------------------------------------------------------------------------------------------------------------------------------------------------------------------------------------------------------------------------------------------------------------------------------------------------------------------------------------------------------------------------------------------------------------------------------------------------------------------------------------------------------------------------------------------------------------------------------------------------------------------------------------------------------------------------------------------------------------------------------------------------------------------------------------------------------------------------------------------------------------------------------------------------------------------------------------------------------------------------------------------------------------------------------------------------------------------------------------------------------------------------------------------------------------------------------------------------------------------------------------------------------------------------------------------------------------------------------------------------------------------------------------------------------------------------------------------------------------------------------------------------------------------------------------------------------------------------------------------------------------------------------------------------------------------------------------------------------------------------------------------------------------------------------------------------------------------------------------------------------------------------------------------------------------------------------------------------------------------------------------------------------------------------------------------------------------------------------------------------------------------------------------------------------|
|                                                                                                                                                                                                                        | <p>C -1.45772 3.21119 1.31377<br/>                     H -1.22875 3.68500 2.27147<br/>                     H -2.39153 2.65494 1.41949<br/>                     H -1.60610 4.00251 0.57443<br/>                     C 0.98448 3.08570 0.76218<br/>                     H 1.80122 2.44650 0.42002<br/>                     H 1.26563 3.50459 1.73075<br/>                     H 0.86257 3.90616 0.04996<br/>                     Cl 2.85614 -0.20433 5.44817</p>                                                                                                                                                                                                                                                                                                                                                                                                                                                                                                                                                                                                                                                                                                                                                                                                                                                                                                                                                                                                                                                                                                                                                                                                                                                                                                                                                                                                                                                                                                                                                                                                                                                                                                           |                                                                                                                                                                                                                         | <p>C -0.91739 2.24753 -2.78503<br/>                     H -0.57321 2.81546 -1.91744<br/>                     H -1.94753 1.93477 -2.60275<br/>                     H -0.90335 2.91331 -3.65182<br/>                     C 1.42702 1.49992 -3.26312<br/>                     H 2.07922 0.64892 -3.47188<br/>                     H 1.81050 2.01218 -2.37815<br/>                     H 1.47184 2.18857 -4.11104<br/>                     Cl 0.06773 2.50927 1.57617</p>                                                                                                                                                                                                                                                                                                                                                                                                                                                                                                                                                                                                                                                                                                                                                                                                                                                                                                                                                                                                                                                                                                                                                                                                                                                                                                                                                                                                                                                                                                                                                                                                                                                                                                   |
| 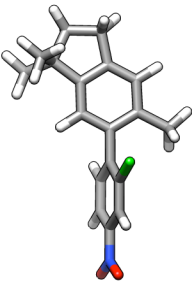 <p><b>4d</b><br/>                     -1361.898180<br/>                     -1361.831504<br/>                     -1362.652436</p>   | <p>C -0.83389 -1.59792 -1.28645<br/>                     C -0.37322 -0.16323 1.04691<br/>                     C -1.03541 -2.20192 -0.05485<br/>                     C -0.41280 -0.27280 -1.35866<br/>                     C -0.18653 0.44616 -0.19743<br/>                     C -0.80880 -1.49653 1.12959<br/>                     H -1.38585 -3.22610 0.00394<br/>                     H 0.13962 1.47829 -0.24030<br/>                     C -0.14613 0.64579 2.27082<br/>                     C 0.19973 2.21845 4.54504<br/>                     C 0.94793 0.45361 3.12611<br/>                     C -1.04625 1.66808 2.59234<br/>                     C -0.88989 2.45843 3.72018<br/>                     C 1.12863 1.22814 4.26347<br/>                     H -1.89120 1.82905 1.93696<br/>                     H -1.59078 3.24054 3.96730<br/>                     H 1.97457 1.07666 4.91517<br/>                     C -0.22284 0.16682 -2.79734<br/>                     C -0.99915 -2.17084 -2.67233<br/>                     H -0.13534 -2.79334 -2.92769<br/>                     H -1.88782 -2.79595 -2.77446<br/>                     C -1.04955 -0.90551 -3.55601<br/>                     H -2.08488 -0.56412 -3.63093<br/>                     H -0.67446 -1.07154 -4.56703<br/>                     C -0.71940 1.58526 -3.06788<br/>                     H -0.14190 2.31569 -2.49588<br/>                     H -1.77149 1.68589 -2.79295<br/>                     H -0.61273 1.82956 -4.12771<br/>                     C 1.26594 0.05722 -3.16862<br/>                     H 1.63134 -0.96022 -3.01387<br/>                     H 1.86474 0.73000 -2.55099<br/>                     H 1.41435 0.32428 -4.21813<br/>                     C -1.05776 -2.15842 2.45964<br/>                     H -0.11810 -2.38525 2.96910<br/>                     H -1.60369 -3.09283 2.32628<br/>                     H -1.63684 -1.51259 3.12327<br/>                     Cl 2.15668 -0.74939 2.76377<br/>                     N 0.38604 3.04258 5.75655<br/>                     O 1.35251 2.80406 6.46394<br/>                     O -0.43964 3.91472 5.97888</p> |  <p><b>4d</b><br/>                     -1361.872009<br/>                     -1361.805480<br/>                     -1362.628291</p>   | <p>C -0.04117 -1.16861 -3.36700<br/>                     C -0.01167 -0.79345 -0.54064<br/>                     C -0.03708 -2.25124 -2.50916<br/>                     C -0.03128 0.10444 -2.82623<br/>                     C -0.01436 0.27726 -1.45950<br/>                     C -0.02589 -2.11406 -1.11381<br/>                     H -0.05146 -3.25161 -2.92447<br/>                     H -0.01041 1.28390 -1.10060<br/>                     C 0.00190 -0.48018 0.93205<br/>                     C 0.02526 -0.12395 3.77769<br/>                     C 0.01773 0.80982 1.55595<br/>                     C 0.00218 -1.53725 1.87267<br/>                     C 0.01318 -1.39812 3.24602<br/>                     C 0.02795 0.97096 2.93783<br/>                     H -0.00639 -2.54158 1.52103<br/>                     H 0.01225 -2.26274 3.89136<br/>                     H 0.03882 1.96080 3.36547<br/>                     C 0.00308 1.16598 -3.90806<br/>                     C -0.04436 -1.10912 -4.87198<br/>                     H 0.96174 -1.30462 -5.25759<br/>                     H -0.71227 -1.84012 -5.33077<br/>                     C -0.46995 0.35241 -5.14415<br/>                     H -1.56001 0.40035 -5.20156<br/>                     H -0.06500 0.75013 -6.07570<br/>                     C -0.90069 2.36048 -3.61130<br/>                     H -0.56620 2.88615 -2.71369<br/>                     H -1.93151 2.03627 -3.45484<br/>                     H -0.88083 3.06873 -4.44325<br/>                     C 1.45168 1.64476 -4.10222<br/>                     H 2.10930 0.80788 -4.34773<br/>                     H 1.82435 2.11266 -3.18855<br/>                     H 1.50261 2.37591 -4.91306<br/>                     C -0.03802 -3.45043 -0.39404<br/>                     H 0.85178 -3.60529 0.22079<br/>                     H -0.05481 -4.25456 -1.12873<br/>                     H -0.92127 -3.58130 0.23555<br/>                     Cl 0.02980 2.39000 0.76932<br/>                     N 0.03644 0.07573 5.23361<br/>                     O 0.03569 -0.92310 5.93845<br/>                     O 0.04578 1.22350 5.65380</p> |
|  <p><b>4e</b><br/>                     -790.0619184<br/>                     -789.9257093<br/>                     -790.6823011</p> | <p>C -0.76584 -1.60713 -1.30158<br/>                     C -0.35947 -0.15596 1.03894<br/>                     C -0.91863 -2.22380 -0.07168<br/>                     C -0.42309 -0.25832 -1.37222<br/>                     C -0.22593 0.46481 -0.21124<br/>                     C -0.71879 -1.51352 1.11684<br/>                     H -1.21179 -3.26598 -0.01391<br/>                     H 0.04321 1.51330 -0.25294<br/>                     C -0.14904 0.67753 2.24790<br/>                     C 0.21159 2.32558 4.50824<br/>                     C 0.85779 0.40367 3.19392<br/>                     C -0.94796 1.80362 2.45892<br/>                     C -0.77624 2.61792 3.57146<br/>                     C 1.02974 1.22350 4.31734<br/>                     H -1.72256 2.02632 1.73738<br/>                     H -1.41761 3.47841 3.71059<br/>                     H 1.81363 0.98969 5.02454<br/>                     H 0.34681 2.95461 5.37756<br/>                     C -0.27381 0.19614 -2.81108<br/>                     C -0.91222 -2.18281 -2.68827<br/>                     H -0.01569 -2.75168 -2.95552<br/>                     H -1.76328 -2.85919 -2.78426<br/>                     C -1.04653 -0.91885 -3.56523<br/>                     H -2.10076 -0.63741 -3.62596<br/>                     H -0.67484 -1.05851 -4.58160<br/>                     C -0.85305 1.58490 -3.07088<br/>                     H -0.31257 2.34456 -2.50064<br/>                     H -1.90642 1.62388 -2.78528<br/>                     H -0.77083 1.83947 -4.13061<br/>                     C 1.21444 0.17250 -3.19928<br/>                     H 1.63934 -0.82239 -3.05071<br/>                     H 1.78055 0.87696 -2.58620<br/>                     H 1.33561 0.44965 -4.24979</p>                                                                                                                                                                                                                                                                                                                                                                                |  <p><b>4e</b><br/>                     -790.0426239<br/>                     -789.9064414<br/>                     -790.6647340</p> | <p>C -0.06646 -1.30004 -2.26190<br/>                     C -0.00017 -0.70642 0.52066<br/>                     C -0.05433 -2.31314 -1.32307<br/>                     C -0.04446 0.01310 -1.82277<br/>                     C -0.00994 0.29161 -0.47437<br/>                     C -0.02425 -2.06274 0.05700<br/>                     H -0.07666 -3.34436 -1.65504<br/>                     H 0.00220 1.32901 -0.06221<br/>                     C 0.03067 -0.27153 1.95967<br/>                     C 0.09131 0.45372 4.75561<br/>                     C 0.05497 1.09037 2.40390<br/>                     C 0.03993 -1.20703 3.01095<br/>                     C 0.06888 -0.87291 4.35713<br/>                     C 0.08421 1.42132 3.77006<br/>                     H 0.02424 -2.25075 2.79345<br/>                     H 0.07355 -1.66792 5.09152<br/>                     H 0.10145 2.46861 4.03928<br/>                     H 0.11375 0.73206 5.80010<br/>                     C -0.02094 0.98801 -2.98250<br/>                     C -0.08922 -1.35515 -3.76763<br/>                     H 0.91101 -1.58335 -4.15075<br/>                     H -0.76573 -2.11605 -4.16084<br/>                     C -0.51368 0.08342 -4.14540<br/>                     H -1.60433 0.13186 -4.19094<br/>                     H -0.12067 0.40645 -5.11049<br/>                     C -0.91405 2.20732 -2.76221<br/>                     H -0.56840 2.79469 -1.90843<br/>                     H -1.94501 1.90055 -2.57337<br/>                     H -0.89996 2.85238 -3.64443<br/>                     C 1.42721 1.44291 -3.23124<br/>                     H 2.07918 0.58608 -3.41645<br/>                     H 1.81049 1.98266 -2.36297<br/>                     H 1.46995 2.10626 -4.09893</p>                                                                                                                                                                                                                                                                                                                                                                                     |



|                                                                                     |   |          |          |          |                                                                                      |   |          |          |          |
|-------------------------------------------------------------------------------------|---|----------|----------|----------|--------------------------------------------------------------------------------------|---|----------|----------|----------|
|                                                                                     | C | -0.92688 | -2.22263 | 2.43090  |                                                                                      | C | -0.02731 | -3.32348 | 0.89811  |
|                                                                                     | H | -0.00025 | -2.68923 | 2.77309  |                                                                                      | H | 0.86872  | -3.41513 | 1.51651  |
|                                                                                     | H | -1.67590 | -3.00829 | 2.32038  |                                                                                      | H | -0.05144 | -4.19455 | 0.24372  |
|                                                                                     | H | -1.25797 | -1.53816 | 3.21268  |                                                                                      | H | -0.90251 | -3.38998 | 1.54872  |
|                                                                                     | C | 1.75892  | -0.69143 | 3.01244  |                                                                                      | C | 0.05489  | 2.27437  | 1.59658  |
|                                                                                     | N | 2.49750  | -1.56792 | 2.89044  |                                                                                      | N | 0.05850  | 3.30404  | 1.07463  |
| 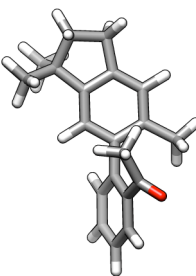   | C | -0.17712 | -0.91403 | -1.75285 |    | C | -0.16762 | -1.31881 | -2.39624 |
|                                                                                     | C | -0.06136 | -0.42231 | 0.98601  |                                                                                      | C | -0.02100 | -0.87302 | 0.40848  |
|                                                                                     | C | -0.23779 | -1.97092 | -0.85813 |                                                                                      | C | -0.10818 | -2.38068 | -1.51461 |
|                                                                                     | C | -0.07899 | 0.39409  | -1.28502 |                                                                                      | C | -0.07845 | -0.03071 | -1.89198 |
|                                                                                     | C | -0.03455 | 0.64026  | 0.07580  |                                                                                      | C | 0.00991  | 0.17469  | -0.53308 |
|                                                                                     | C | -0.17657 | -1.74416 | 0.51988  |                                                                                      | C | -0.01800 | -2.19872 | -0.12681 |
|                                                                                     | H | -0.33288 | -2.98933 | -1.21808 |                                                                                      | H | -0.11229 | -3.39497 | -1.89689 |
|                                                                                     | H | 0.05039  | 1.65276  | 0.45188  |                                                                                      | H | 0.13558  | 1.19258  | -0.21731 |
|                                                                                     | C | 0.01507  | -0.11769 | 2.43798  |                                                                                      | C | -0.01442 | -0.52780 | 1.86896  |
|                                                                                     | C | -0.03454 | 0.41821  | 5.19657  |                                                                                      | C | 0.26283  | 0.00611  | 4.66860  |
|                                                                                     | C | 1.05484  | -0.57403 | 3.26850  |                                                                                      | C | 0.18231  | 0.79229  | 2.36619  |
|                                                                                     | C | -1.02485 | 0.61921  | 3.01278  |                                                                                      | C | -0.18800 | -1.51205 | 2.85931  |
|                                                                                     | C | -1.05061 | 0.89546  | 4.37377  |                                                                                      | C | -0.05987 | -1.26354 | 4.21940  |
|                                                                                     | C | 1.00323  | -0.31593 | 4.64302  |                                                                                      | C | 0.36265  | 1.02385  | 3.73171  |
|                                                                                     | H | -1.83162 | 0.95752  | 2.37554  |                                                                                      | H | -0.45119 | -2.51065 | 2.58019  |
|                                                                                     | H | -1.86723 | 1.47025  | 4.79139  |                                                                                      | H | -0.20734 | -2.07575 | 4.91933  |
|                                                                                     | H | 1.80513  | -0.69366 | 5.26254  |                                                                                      | H | 0.55644  | 2.03801  | 4.05739  |
|                                                                                     | H | -0.05011 | 0.61983  | 6.25955  |                                                                                      | H | 0.40211  | 0.21252  | 5.72132  |
|                                                                                     | C | -0.08182 | 1.38882  | -2.42964 |                                                                                      | C | -0.02783 | 0.99780  | -3.00364 |
|                                                                                     | C | -0.23079 | -0.92856 | -3.26066 |                                                                                      | C | -0.23868 | -1.29354 | -3.90210 |
|                                                                                     | H | 0.36150  | -1.73111 | -3.70343 |                                                                                      | H | 0.73546  | -1.55041 | -4.33120 |
|                                                                                     | H | -1.26295 | -1.06392 | -3.60074 |                                                                                      | H | -0.96572 | -1.99760 | -4.31080 |
|                                                                                     | C | 0.29259  | 0.47696  | -3.62844 |                                                                                      | C | -0.60159 | 0.18122  | -4.19325 |
|                                                                                     | H | -0.10939 | 0.85320  | -4.57043 |                                                                                      | H | -1.68939 | 0.28547  | -4.19999 |
|                                                                                     | H | 1.38122  | 0.44000  | -3.71584 |                                                                                      | H | -0.22237 | 0.53478  | -5.15319 |
|                                                                                     | C | -1.50124 | 1.95368  | -2.60921 |                                                                                      | C | -0.84448 | 2.25293  | -2.70239 |
|                                                                                     | H | -1.81092 | 2.49998  | -1.71559 |                                                                                      | H | -0.43261 | 2.78442  | -1.84106 |
|                                                                                     | H | -2.22038 | 1.15008  | -2.78220 |                                                                                      | H | -1.88339 | 1.99559  | -2.48520 |
|                                                                                     | H | -1.53170 | 2.63702  | -3.46187 |                                                                                      | H | -0.82580 | 2.93424  | -3.55665 |
|                                                                                     | C | 0.90902  | 2.53488  | -2.23718 |                                                                                      | C | 1.43655  | 1.38426  | -3.27107 |
|                                                                                     | H | 1.92057  | 2.15043  | -2.09079 |                                                                                      | H | 2.03170  | 0.50297  | -3.52007 |
|                                                                                     | H | 0.64075  | 3.13882  | -1.36693 |                                                                                      | H | 1.87501  | 1.85220  | -2.38728 |
|                                                                                     | H | 0.90940  | 3.18903  | -3.11275 |                                                                                      | H | 1.49529  | 2.09018  | -4.10365 |
|                                                                                     | C | -0.22734 | -2.91876 | 1.46400  |                                                                                      | C | 0.15207  | -3.48579 | 0.65369  |
|                                                                                     | H | 0.77218  | -3.22351 | 1.78653  |                                                                                      | H | 0.94140  | -3.40926 | 1.40206  |
|                                                                                     | H | -0.69004 | -3.77716 | 0.97511  |                                                                                      | H | 0.42407  | -4.28767 | -0.03327 |
|                                                                                     | H | -0.79223 | -2.68265 | 2.36643  |                                                                                      | H | -0.76497 | -3.80085 | 1.16009  |
|                                                                                     | C | 2.27504  | -1.30127 | 2.77756  |                                                                                      | C | 0.06387  | 2.09443  | 1.61356  |
|                                                                                     | C | 2.86285  | -0.95394 | 1.42407  |                                                                                      | C | -1.35191 | 2.47533  | 1.21863  |
|                                                                                     | H | 2.43960  | -1.60879 | 0.66024  |                                                                                      | H | -1.33487 | 3.26084  | 0.46426  |
|                                                                                     | H | 3.93807  | -1.12347 | 1.47141  |                                                                                      | H | -1.84731 | 2.85360  | 2.11830  |
|                                                                                     | H | 2.63998  | 0.07046  | 1.12891  |                                                                                      | H | -1.91419 | 1.61110  | 0.86621  |
|                                                                                     | O | 2.82188  | -2.12013 | 3.48884  |                                                                                      | O | 0.99135  | 2.86128  | 1.48615  |
|  | C | 0.21259  | -0.04953 | 1.11978  |  | C | -0.06554 | -1.17052 | -2.26268 |
|                                                                                     | C | 0.17397  | -0.09367 | 3.90591  |                                                                                      | C | 0.00122  | -0.58826 | 0.52260  |
|                                                                                     | C | 0.51250  | -1.22036 | 1.79668  |                                                                                      | C | -0.05054 | -2.18738 | -1.32859 |
|                                                                                     | C | -0.11821 | 1.10284  | 1.82826  |                                                                                      | C | -0.04776 | 0.14060  | -1.81763 |
|                                                                                     | C | -0.13970 | 1.08196  | 3.21087  |                                                                                      | C | -0.01205 | 0.42068  | -0.46796 |
|                                                                                     | C | 0.49895  | -1.26336 | 3.19444  |                                                                                      | C | -0.02071 | -1.94023 | 0.05161  |
|                                                                                     | H | 0.74427  | -2.12641 | 1.24794  |                                                                                      | H | -0.06985 | -3.21784 | -1.66363 |
|                                                                                     | H | -0.39287 | 1.97299  | 3.77253  |                                                                                      | H | -0.00081 | 1.45283  | -0.18057 |
|                                                                                     | C | 0.10066  | -0.06594 | 5.38693  |                                                                                      | C | 0.03343  | -0.17511 | 1.96795  |
|                                                                                     | C | -0.06476 | 0.03596  | 8.20132  |                                                                                      | C | 0.09840  | 0.57806  | 4.75866  |
|                                                                                     | C | 1.18001  | -0.39087 | 6.20577  |                                                                                      | C | 0.05602  | 1.16353  | 2.42734  |
|                                                                                     | C | -1.07445 | 0.33211  | 6.03585  |                                                                                      | C | 0.04701  | -1.10164 | 3.03409  |
|                                                                                     | C | -1.16421 | 0.38303  | 7.42159  |                                                                                      | C | 0.07814  | -0.75455 | 4.37726  |
|                                                                                     | C | 1.12143  | -0.35173 | 7.58846  |                                                                                      | C | 0.08696  | 1.53762  | 3.76035  |
|                                                                                     | H | -1.92937 | 0.59195  | 5.42541  |                                                                                      | H | 0.03313  | -2.14780 | 2.82490  |
|                                                                                     | H | -2.09026 | 0.68717  | 7.89082  |                                                                                      | H | 0.08633  | -1.54065 | 5.12052  |
|                                                                                     | H | 2.00130  | -0.61299 | 8.16010  |                                                                                      | H | 0.10185  | 2.59541  | 3.98449  |
|                                                                                     | H | -0.12523 | 0.06983  | 9.28092  |                                                                                      | H | 0.12282  | 0.86799  | 5.80030  |
|                                                                                     | C | 0.79832  | -2.56539 | 3.89115  |                                                                                      | C | -0.02129 | -3.19992 | 0.89322  |
|                                                                                     | H | 0.20545  | -2.67689 | 4.80046  |                                                                                      | H | -0.89485 | -3.26493 | 1.54599  |
|                                                                                     | H | 1.84928  | -2.62130 | 4.18326  |                                                                                      | H | 0.87533  | -3.28859 | 1.51102  |
|                                                                                     | H | 0.58492  | -3.40782 | 3.23161  |                                                                                      | H | -0.04571 | -4.07197 | 0.23981  |
|                                                                                     | C | -0.37096 | 2.26950  | 0.89277  |                                                                                      | C | -0.02426 | 1.11659  | -2.97860 |
|                                                                                     | C | 0.18228  | 0.22096  | -0.36438 |                                                                                      | C | -0.08504 | -1.22319 | -3.76871 |
|                                                                                     | H | 1.19989  | 0.36136  | -0.74404 |                                                                                      | H | 0.91601  | -1.44729 | -4.15239 |
|                                                                                     | H | -0.26634 | -0.59102 | -0.93938 |                                                                                      | H | -0.75930 | -1.98450 | -4.16515 |
|                                                                                     | C | -0.62546 | 1.53447  | -0.45028 |                                                                                      | C | -0.51361 | 0.21395  | -4.14398 |
|                                                                                     | H | -1.68907 | 1.29432  | -0.52376 |                                                                                      | H | -1.60449 | 0.25891  | -4.18950 |
|                                                                                     | H | -0.35750 | 2.14951  | -1.31097 |                                                                                      | H | -0.12162 | 0.54126  | -5.10828 |
|                                                                                     | C | -1.55331 | 3.13890  | 1.31486  |                                                                                      | C | -0.92193 | 2.33336  | -2.76569 |
|                                                                                     | H | -1.36076 | 3.61446  | 2.29771  |                                                                                      | H | -0.57656 | 2.92590  | -1.91525 |
|                                                                                     | H | -2.46185 | 2.53921  | 1.40174  |                                                                                      | H | -1.95134 | 2.02439  | -2.57293 |
|                                                                                     | H | -1.72709 | 3.92898  | 0.57977  |                                                                                      | H | -0.91065 | 2.97497  | -3.65061 |

|                                                                                                                                                                                                                        |                                                                                                                                                                                                                                                                                                                                                                                                                                                                                                                                                                                                                                                                                                                                                                                                                                                                                                                                                                                                                                                                                                                                                                                                                                                                         |                                                                                                                                                                                                                         |                                                                                                                                                                                                                                                                                                                                                                                                                                                                                                                                                                                                                                                                                                                                                                                                                                                                                                                                                                                                                                                                                                                                                                                                                                                                       |
|------------------------------------------------------------------------------------------------------------------------------------------------------------------------------------------------------------------------|-------------------------------------------------------------------------------------------------------------------------------------------------------------------------------------------------------------------------------------------------------------------------------------------------------------------------------------------------------------------------------------------------------------------------------------------------------------------------------------------------------------------------------------------------------------------------------------------------------------------------------------------------------------------------------------------------------------------------------------------------------------------------------------------------------------------------------------------------------------------------------------------------------------------------------------------------------------------------------------------------------------------------------------------------------------------------------------------------------------------------------------------------------------------------------------------------------------------------------------------------------------------------|-------------------------------------------------------------------------------------------------------------------------------------------------------------------------------------------------------------------------|-----------------------------------------------------------------------------------------------------------------------------------------------------------------------------------------------------------------------------------------------------------------------------------------------------------------------------------------------------------------------------------------------------------------------------------------------------------------------------------------------------------------------------------------------------------------------------------------------------------------------------------------------------------------------------------------------------------------------------------------------------------------------------------------------------------------------------------------------------------------------------------------------------------------------------------------------------------------------------------------------------------------------------------------------------------------------------------------------------------------------------------------------------------------------------------------------------------------------------------------------------------------------|
|                                                                                                                                                                                                                        | C 0.89981 3.13115 0.79862<br>H 1.75043 2.53296 0.46495<br>H 1.14634 3.55592 1.77407<br>H 0.75067 3.95011 0.08987<br>F 2.35784 -0.73539 5.63686                                                                                                                                                                                                                                                                                                                                                                                                                                                                                                                                                                                                                                                                                                                                                                                                                                                                                                                                                                                                                                                                                                                          |                                                                                                                                                                                                                         | C 1.42257 1.57528 -3.22680<br>H 2.07487 0.71953 -3.41475<br>H 1.80714 2.11009 -2.35573<br>H 1.46587 2.24224 -4.09200<br>F 0.04976 2.22634 1.58006                                                                                                                                                                                                                                                                                                                                                                                                                                                                                                                                                                                                                                                                                                                                                                                                                                                                                                                                                                                                                                                                                                                     |
| 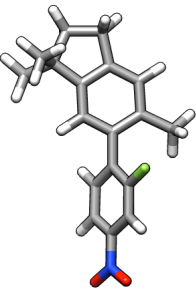 <p><b>4h</b><br/>                     -1001.586772<br/>                     -1001.428166<br/>                     -1002.307108</p>   | C -0.77806 -1.62238 -1.28533<br>C -0.37018 -0.18798 1.06510<br>C -0.93818 -2.24594 -0.05909<br>C -0.42509 -0.27578 -1.34698<br>C -0.22723 0.43926 -0.18129<br>C -0.73620 -1.54504 1.13404<br>H -1.24210 -3.28539 -0.00890<br>H 0.04940 1.48590 -0.21687<br>C -0.17185 0.63880 2.27675<br>C 0.19996 2.24850 4.53007<br>C 0.74127 0.30825 3.28088<br>C -0.88265 1.83433 2.44601<br>C -0.71069 2.64270 3.55906<br>C 0.94241 1.08237 4.40656<br>H -1.59565 2.11603 1.68351<br>H -1.27007 3.55612 3.68726<br>H 1.66209 0.79431 5.15689<br>C -0.27032 0.18666 -2.78275<br>C -0.92908 -2.18761 -2.67561<br>H -0.03766 -2.76278 -2.94653<br>H -1.78594 -2.85594 -2.77550<br>C -1.05227 -0.91681 -3.54434<br>H -2.10394 -0.62617 -3.60378<br>H -0.68131 -1.05324 -4.56127<br>C -0.83668 1.58223 -3.03395<br>H -0.28933 2.33364 -2.45941<br>H -1.88976 1.62938 -2.74875<br>H -0.75168 1.84237 -4.09197<br>C 1.21806 0.15179 -3.16972<br>H 1.63360 -0.84816 -3.02818<br>H 1.79022 0.84731 -2.55202<br>H 1.34247 0.43478 -4.21813<br>C -0.95792 -2.25564 2.44432<br>H -0.02655 -2.68418 2.82071<br>H -1.67522 -3.06760 2.31807<br>H -1.33616 -1.57859 3.21170<br>N 0.39485 3.08859 5.72635<br>O 1.19609 2.70534 6.56537<br>O -0.25686 4.11875 5.80775<br>F 1.49546 -0.79908 3.14556 |  <p><b>4h</b><br/>                     -1001.570132<br/>                     -1001.411090<br/>                     -1002.291544</p>   | C -0.00786 -1.08063 -3.34212<br>C -0.01047 -0.70999 -0.52382<br>C 0.01099 -2.16594 -2.48789<br>C -0.03062 0.19471 -2.80163<br>C -0.02828 0.37259 -1.43527<br>C 0.00667 -2.02514 -1.09361<br>H 0.02119 -3.16726 -2.90152<br>H -0.04728 1.38031 -1.07220<br>C -0.01260 -0.40808 0.94380<br>C -0.00743 0.12119 3.75721<br>C -0.02768 0.89668 1.50386<br>C 0.00516 -1.41634 1.93493<br>C 0.00754 -1.18346 3.29921<br>C -0.02508 1.17020 2.85693<br>H 0.01865 -2.44232 1.64433<br>H 0.02139 -2.00412 3.99932<br>H -0.03657 2.19550 3.19259<br>C -0.01085 1.25453 -3.88643<br>C 0.00293 -1.02145 -4.84719<br>H 1.01740 -1.19311 -5.2217<br>H -0.64248 -1.76856 -5.31216<br>C -0.45402 0.42880 -5.12526<br>H -1.54436 0.45141 -5.19232<br>H -0.05023 0.83498 -6.05367<br>C -0.94497 2.42864 -3.60254<br>H -0.63035 2.96758 -2.70571<br>H -1.96903 2.08058 -3.45274<br>H -0.93550 3.13244 -4.43846<br>C 1.42792 1.76630 -4.06889<br>H 2.10714 0.94426 -4.30557<br>H 1.78113 2.24575 -3.15346<br>H 1.46924 2.49598 -4.88158<br>C 0.01433 -3.34537 -0.35084<br>H 0.90241 -3.46781 0.27359<br>H 0.01682 -4.16435 -1.06942<br>H -0.86977 -3.47604 0.27745<br>N -0.00389 0.40346 5.19863<br>O 0.00762 -0.55135 5.96219<br>O -0.01242 1.57453 5.54940<br>F -0.04538 2.01573 0.74222 |
|  <p><b>4i</b><br/>                     -994.9351955<br/>                     -995.3338788<br/>                     -995.3846062</p> | C 0.12086 -0.06197 1.12099<br>C 0.12595 -0.07154 3.89954<br>C 0.35358 -1.24574 1.80502<br>C -0.11639 1.11783 1.82039<br>C -0.11550 1.11577 3.20553<br>C 0.35834 -1.26804 3.20159<br>H 0.52700 -2.16901 1.26368<br>H -0.29531 2.02792 3.76149<br>C 0.11394 -0.05355 5.38664<br>C -0.01364 -0.02926 8.19634<br>C 1.27554 0.00105 6.16382<br>C -1.11247 -0.08790 6.05943<br>C -1.18361 -0.07612 7.44645<br>C 1.21926 0.01200 7.55539<br>H -2.01821 -0.12856 5.46827<br>H -2.14702 -0.10468 7.93822<br>H 2.13012 0.05714 8.13529<br>H -0.05329 -0.02077 9.27771<br>C 0.60796 -2.55619 3.94053<br>H -0.17861 -2.75187 4.67297<br>H 1.55214 -2.51440 4.48998<br>H 0.65408 -3.39629 3.24668<br>C -0.29816 2.29018 0.87607<br>C 0.09036 0.19502 -0.36580<br>H 1.11040 0.25643 -0.75947<br>H -0.42408 -0.58775 -0.92603<br>C -0.62053 1.56303 -0.45650<br>H -1.69953 1.40035 -0.51639<br>H -0.31826 2.14873 -1.32624<br>C -1.41070 3.24506 1.30334<br>H -1.17281 3.71502 2.26074<br>H -2.35819 2.71216 1.40752<br>H -1.53751 4.03828 0.56202<br>C 1.02953 3.05836 0.75992<br>H 1.83116 2.39866 0.42104<br>H 1.31819 3.47091 1.72895<br>H 0.93005 3.88077 0.04648                                                                                                                 |  <p><b>4i</b><br/>                     -994.9032645<br/>                     -995.3021840<br/>                     -995.3551985</p> | C -0.06453 -1.36481 -2.96447<br>C 0.00144 -1.43254 -0.11068<br>C -0.05742 -2.56612 -2.28316<br>C -0.04532 -0.19331 -2.23108<br>C -0.01147 -0.23996 -0.85412<br>C -0.03023 -2.64672 -0.88213<br>H -0.08320 -3.49090 -2.84709<br>H -0.00219 0.70118 -0.34675<br>C 0.04155 -1.33907 1.39870<br>C 0.10102 -1.45539 4.28953<br>C 0.07403 -0.16783 2.21952<br>C 0.05310 -2.53251 2.15531<br>C 0.08125 -2.61354 3.53624<br>C 0.09898 -0.24635 3.61571<br>H 0.04111 -3.46533 1.64289<br>H 0.08721 -3.58814 4.00640<br>H 0.11972 0.66343 4.19677<br>H 0.12081 -1.47434 5.37084<br>C -0.05103 -4.07966 -0.38005<br>H -0.92292 -4.29416 0.24229<br>H 0.84757 -4.34162 0.18377<br>H -0.09689 -4.75882 -1.23104<br>C -0.01969 1.02607 -3.13026<br>C -0.08059 -1.06901 -4.44209<br>H 0.92053 -1.20316 -4.86533<br>H -0.75683 -1.71515 -5.00475<br>C -0.50298 0.41860 -4.47605<br>H -1.59334 0.47732 -4.51672<br>H -0.10359 0.95816 -5.33627<br>C -0.92086 2.15646 -2.63809<br>H -0.58029 2.52746 -1.66861<br>H -1.95049 1.80963 -2.52856<br>H -0.90739 2.99028 -3.34484<br>C 1.42673 1.53307 -3.25669<br>H 2.08290 0.74679 -3.63664<br>H 1.80496 1.85005 -2.28255<br>H 1.47120 2.38413 -3.94148                                                                                     |

|                                                                                                                                                         |          |          |          |          |                                                                                                                                                          |          |          |          |          |
|---------------------------------------------------------------------------------------------------------------------------------------------------------|----------|----------|----------|----------|----------------------------------------------------------------------------------------------------------------------------------------------------------|----------|----------|----------|----------|
|                                                                                                                                                         | I        | 3.18799  | 0.10292  | 5.24958  |                                                                                                                                                          | I        | 0.11161  | 1.93358  | 1.69983  |
| 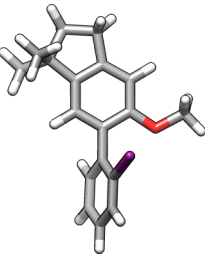 <p><b>4j</b><br/>-1070.143524<br/>-1070.528643<br/>-1070.633998</p>   | C        | -0.13842 | -0.02657 | 1.70567  |  <p><b>4j</b><br/>-1070.118101<br/>-1070.503287<br/>-1070.611253</p>   | C        | 0.00210  | -0.59120 | -3.08873 |
|                                                                                                                                                         | C        | 0.05882  | 0.41947  | 4.44774  |                                                                                                                                                          | C        | 0.03496  | -1.15683 | -0.28446 |
|                                                                                                                                                         | C        | 0.02824  | -1.11265 | 2.55570  |                                                                                                                                                          | C        | 0.05256  | -1.90043 | -2.64642 |
|                                                                                                                                                         | C        | -0.22037 | 1.26717  | 2.20469  |                                                                                                                                                          | C        | -0.03218 | 0.43166  | -2.16030 |
|                                                                                                                                                         | C        | -0.12174 | 1.48710  | 3.57071  |                                                                                                                                                          | C        | -0.01220 | 0.14318  | -0.81091 |
|                                                                                                                                                         | C        | 0.11665  | -0.88870 | 3.93109  |                                                                                                                                                          | C        | 0.06620  | -2.19581 | -1.27835 |
|                                                                                                                                                         | H        | 0.07488  | -2.11541 | 2.15612  |                                                                                                                                                          | H        | 0.07288  | -2.70233 | -3.36773 |
|                                                                                                                                                         | H        | -0.16932 | 2.49059  | 3.97569  |                                                                                                                                                          | H        | -0.04029 | 0.97740  | -0.14133 |
|                                                                                                                                                         | C        | 0.15700  | 0.67022  | 5.90679  |                                                                                                                                                          | C        | 0.04759  | -1.37293 | 1.20735  |
|                                                                                                                                                         | C        | 0.22338  | 1.21535  | 8.66663  |                                                                                                                                                          | C        | 0.08504  | -2.05677 | 4.01248  |
|                                                                                                                                                         | C        | 1.32311  | 0.47123  | 6.65645  |                                                                                                                                                          | C        | 0.01650  | -0.38735 | 2.24084  |
|                                                                                                                                                         | C        | -0.96654 | 1.16268  | 6.58066  |                                                                                                                                                          | C        | 0.09909  | -2.69819 | 1.70524  |
|                                                                                                                                                         | C        | -0.94206 | 1.43484  | 7.94212  |                                                                                                                                                          | C        | 0.11756  | -3.04359 | 3.04463  |
|                                                                                                                                                         | C        | 1.35902  | 0.73667  | 8.02243  |                                                                                                                                                          | C        | 0.03508  | -0.73809 | 3.59402  |
|                                                                                                                                                         | H        | -1.87320 | 1.31991  | 6.01106  |                                                                                                                                                          | H        | 0.12597  | -3.49629 | 0.99335  |
|                                                                                                                                                         | H        | -1.82958 | 1.81101  | 8.43367  |                                                                                                                                                          | H        | 0.15759  | -4.09033 | 3.16172  |
|                                                                                                                                                         | H        | 2.27080  | 0.57989  | 8.58107  |                                                                                                                                                          | H        | 0.00988  | 0.03861  | 4.34369  |
|                                                                                                                                                         | H        | 0.25845  | 1.41890  | 9.72890  |                                                                                                                                                          | H        | 0.09757  | -2.28958 | 5.06893  |
|                                                                                                                                                         | C        | -0.35064 | 2.28371  | 1.08719  |                                                                                                                                                          | C        | -0.03825 | 1.79161  | -2.82923 |
|                                                                                                                                                         | C        | -0.23601 | -0.01549 | 0.20011  |                                                                                                                                                          | C        | -0.00406 | -0.03939 | -4.49086 |
|                                                                                                                                                         | H        | 0.75952  | -0.12622 | -0.24262 |                                                                                                                                                          | H        | 1.00734  | -0.06474 | -4.91033 |
|                                                                                                                                                         | H        | -0.85586 | -0.82215 | -0.19585 |                                                                                                                                                          | H        | -0.64902 | -0.59775 | -5.17213 |
|                                                                                                                                                         | C        | -0.81823 | 1.38516  | -0.08897 |                                                                                                                                                          | C        | -0.47856 | 1.41607  | -4.27107 |
|                                                                                                                                                         | H        | -1.90931 | 1.32666  | -0.07489 |                                                                                                                                                          | H        | -1.56953 | 1.44541  | -4.32452 |
|                                                                                                                                                         | H        | -0.51354 | 1.78577  | -1.05724 |                                                                                                                                                          | H        | -0.08532 | 2.11125  | -5.01450 |
|                                                                                                                                                         | C        | -1.34657 | 3.39915  | 1.39813  |                                                                                                                                                          | C        | -0.99069 | 2.78413  | -2.16543 |
|                                                                                                                                                         | H        | -1.01092 | 3.99195  | 2.25264  |                                                                                                                                                          | H        | -0.68136 | 2.98728  | -1.13743 |
| H                                                                                                                                                       | -2.32974 | 2.98493  | 1.63150  | H        | -2.00786                                                                                                                                                 | 2.38742  | -2.14377 |          |          |
| H                                                                                                                                                       | -1.44651 | 4.07127  | 0.54190  | H        | -0.99729                                                                                                                                                 | 3.73130  | -2.71119 |          |          |
| C                                                                                                                                                       | 1.02917  | 2.89104  | 0.78221  | C        | 1.38801                                                                                                                                                  | 2.36643  | -2.83421 |          |          |
| H                                                                                                                                                       | 1.74725  | 2.11056  | 0.52155  | H        | 2.08025                                                                                                                                                  | 1.68440  | -3.33320 |          |          |
| H                                                                                                                                                       | 1.41241  | 3.42501  | 1.65443  | H        | 1.73957                                                                                                                                                  | 2.51851  | -1.81156 |          |          |
| H                                                                                                                                                       | 0.95950  | 3.59354  | -0.05271 | H        | 1.40929                                                                                                                                                  | 3.32690  | -3.35614 |          |          |
| I                                                                                                                                                       | 3.12777  | -0.17430 | 5.74449  | I        | -0.06116                                                                                                                                                 | 1.77254  | 2.13108  |          |          |
| O                                                                                                                                                       | 0.23826  | -1.88445 | 4.85040  | O        | 0.10364                                                                                                                                                  | -3.50481 | -0.88985 |          |          |
| C                                                                                                                                                       | 0.48216  | -3.19953 | 4.38380  | C        | 0.15336                                                                                                                                                  | -4.53611 | -1.85988 |          |          |
| H                                                                                                                                                       | -0.36691 | -3.57882 | 3.80570  | H        | -0.73652                                                                                                                                                 | -4.52662 | -2.49640 |          |          |
| H                                                                                                                                                       | 0.62372  | -3.81293 | 5.27095  | H        | 0.19038                                                                                                                                                  | -5.46707 | -1.29732 |          |          |
| H                                                                                                                                                       | 1.38313  | -3.23230 | 3.76309  | H        | 1.04605                                                                                                                                                  | -4.44897 | -2.48649 |          |          |
|  <p><b>4k</b><br/>-815.7442844<br/>-815.6186639<br/>-816.4001283</p> | C        | -0.85160 | -1.60044 | -1.43762 |  <p><b>4k</b><br/>-815.7108106<br/>-815.5851833<br/>-816.3682468</p> | C        | -0.11065 | -1.22207 | -2.58386 |
|                                                                                                                                                         | C        | -0.39242 | -0.76128 | 1.17952  |                                                                                                                                                          | C        | -0.05154 | -0.90389 | 0.26241  |
|                                                                                                                                                         | C        | -1.26027 | -2.39522 | -0.37670 |                                                                                                                                                          | C        | -0.05994 | -2.31896 | -1.74698 |
|                                                                                                                                                         | C        | -0.22154 | -0.38326 | -1.19720 |                                                                                                                                                          | C        | -0.05553 | 0.03537  | -2.01276 |
|                                                                                                                                                         | C        | 0.00175  | 0.03878  | 0.10381  |                                                                                                                                                          | C        | -0.01597 | 0.17791  | -0.64245 |
|                                                                                                                                                         | C        | -1.03416 | -1.98989 | 0.94094  |                                                                                                                                                          | C        | -0.00573 | -2.20645 | -0.34858 |
|                                                                                                                                                         | H        | -1.75799 | -3.34137 | -0.55841 |                                                                                                                                                          | H        | -0.04123 | -3.31276 | -2.17900 |
|                                                                                                                                                         | H        | 0.49566  | 0.98235  | 0.30267  |                                                                                                                                                          | H        | 0.05814  | 1.17835  | -0.28454 |
|                                                                                                                                                         | C        | -0.13593 | -0.28607 | 2.56763  |                                                                                                                                                          | C        | -0.08138 | -0.63264 | 1.75283  |
|                                                                                                                                                         | C        | 0.27543  | 0.69927  | 5.15244  |                                                                                                                                                          | C        | 0.19061  | -0.42304 | 4.60050  |
|                                                                                                                                                         | C        | 0.86328  | -0.85434 | 3.37509  |                                                                                                                                                          | C        | -0.04453 | 0.65152  | 2.40099  |
|                                                                                                                                                         | C        | -0.90784 | 0.76703  | 3.06622  |                                                                                                                                                          | C        | -0.15113 | -1.73242 | 2.63309  |
|                                                                                                                                                         | C        | -0.71100 | 1.26101  | 4.34965  |                                                                                                                                                          | C        | -0.01891 | -1.65496 | 4.00963  |
|                                                                                                                                                         | C        | 1.05123  | -0.34339 | 4.66113  |                                                                                                                                                          | C        | 0.14403  | 0.69658  | 3.78726  |
|                                                                                                                                                         | H        | -1.67528 | 1.19352  | 2.43265  |                                                                                                                                                          | H        | -0.33424 | -2.70701 | 2.24240  |
|                                                                                                                                                         | H        | -1.32259 | 2.07423  | 4.71857  |                                                                                                                                                          | H        | -0.07592 | -2.55999 | 4.60058  |
|                                                                                                                                                         | H        | 1.82485  | -0.76594 | 5.28879  |                                                                                                                                                          | H        | 0.23187  | 1.66222  | 4.62202  |
|                                                                                                                                                         | H        | 0.44300  | 1.07191  | 6.15487  |                                                                                                                                                          | H        | 0.34049  | -0.32168 | 5.66745  |
|                                                                                                                                                         | C        | 0.09350  | 0.33817  | -2.49345 |                                                                                                                                                          | C        | 0.01307  | 1.12112  | -3.06836 |
|                                                                                                                                                         | C        | -0.99978 | -1.83067 | -2.92186 |                                                                                                                                                          | C        | -0.14107 | -1.12525 | -4.08804 |
|                                                                                                                                                         | H        | -0.79434 | -2.86055 | -3.21931 |                                                                                                                                                          | H        | 0.84587  | -1.35373 | -4.50411 |
|                                                                                                                                                         | H        | -2.02163 | -1.60023 | -3.24150 |                                                                                                                                                          | H        | -0.85151 | -1.81268 | -4.55090 |
|                                                                                                                                                         | C        | 0.00624  | -0.82292 | -3.51947 |                                                                                                                                                          | C        | -0.51040 | 0.35953  | -4.31663 |
|                                                                                                                                                         | H        | -0.27503 | -0.47108 | -4.51346 |                                                                                                                                                          | H        | -1.59844 | 0.45349  | -4.35476 |
|                                                                                                                                                         | H        | 0.98641  | -1.30040 | -3.59433 |                                                                                                                                                          | H        | -0.10393 | 0.76479  | -5.24472 |
|                                                                                                                                                         | C        | -0.99966 | 1.38340  | -2.77350 |                                                                                                                                                          | C        | -0.83161 | 2.34798  | -2.73123 |
|                                                                                                                                                         | H        | -1.01578 | 2.13934  | -1.98536 |                                                                                                                                                          | H        | -0.46051 | 2.83537  | -1.82572 |
| H                                                                                                                                                       | -1.98484 | 0.91352  | -2.81317 | H        | -1.87384                                                                                                                                                 | 2.06645  | -2.56735 |          |          |
| H                                                                                                                                                       | -0.81289 | 1.88115  | -3.72882 | H        | -0.79086                                                                                                                                                 | 3.07676  | -3.54479 |          |          |
| C                                                                                                                                                       | 1.46345  | 1.01302  | -2.49217 | C        | 1.47870                                                                                                                                                  | 1.54123  | -3.26970 |          |          |
| H                                                                                                                                                       | 2.25077  | 0.28750  | -2.27716 | H        | 2.09455                                                                                                                                                  | 0.68185  | -3.54362 |          |          |
| H                                                                                                                                                       | 1.50730  | 1.80186  | -1.73728 | H        | 1.88254                                                                                                                                                  | 1.96795  | -2.34884 |          |          |
| H                                                                                                                                                       | 1.66546  | 1.46747  | -3.46561 | H        | 1.55451                                                                                                                                                  | 2.29058  | -4.06223 |          |          |
| C                                                                                                                                                       | -1.47107 | -2.86472 | 2.08686  | C        | 0.17474                                                                                                                                                  | -3.55058 | 0.33594  |          |          |
| H                                                                                                                                                       | -2.08177 | -3.69438 | 1.72840  | H        | 0.99417                                                                                                                                                  | -3.53897 | 1.05577  |          |          |
| H                                                                                                                                                       | -2.04693 | -2.29530 | 2.81949  | H        | 0.41390                                                                                                                                                  | -4.30410 | -0.41479 |          |          |
| H                                                                                                                                                       | -0.61122 | -3.27989 | 2.61892  | H        | -0.72590                                                                                                                                                 | -3.89657 | 0.85073  |          |          |
| C                                                                                                                                                       | 1.78510  | -1.93734 | 2.84652  | C        | -0.23674                                                                                                                                                 | 2.02716  | 1.75433  |          |          |
| H                                                                                                                                                       | 1.32068  | -2.37551 | 1.96388  | H        | -0.87904                                                                                                                                                 | 1.90708  | 0.88779  |          |          |
| C                                                                                                                                                       | 2.02919  | -3.06586 | 3.85332  | C        | 1.10884                                                                                                                                                  | 2.64064  | 1.33259  |          |          |
| H                                                                                                                                                       | 2.62339  | -3.85624 | 3.38955  | H        | 1.69287                                                                                                                                                  | 1.96641  | 0.70508  |          |          |
| H                                                                                                                                                       | 1.08776  | -3.49718 | 4.19971  | H        | 1.69829                                                                                                                                                  | 2.85491  | 2.22718  |          |          |

|                                                                                     |   |          |          |          |                                                                                      |   |          |          |          |
|-------------------------------------------------------------------------------------|---|----------|----------|----------|--------------------------------------------------------------------------------------|---|----------|----------|----------|
|                                                                                     | H | 2.57873  | -2.70804 | 4.72661  |                                                                                      | H | 0.95553  | 3.57836  | 0.79185  |
|                                                                                     | C | 3.11560  | -1.31498 | 2.39797  |                                                                                      | C | -0.99429 | 3.03948  | 2.63214  |
|                                                                                     | H | 3.77686  | -2.08069 | 1.98434  |                                                                                      | H | -0.38240 | 3.42769  | 3.44811  |
|                                                                                     | H | 3.61962  | -0.84596 | 3.24680  |                                                                                      | H | -1.89685 | 2.59827  | 3.05764  |
|                                                                                     | H | 2.94769  | -0.55162 | 1.63601  |                                                                                      | H | -1.28220 | 3.89107  | 2.01171  |
| 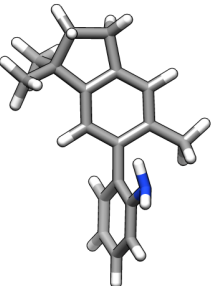   | C | -0.69395 | -0.99390 | -1.82212 |    | C | -0.15201 | -1.16407 | -2.22142 |
|                                                                                     | C | -0.27986 | -0.24252 | 0.83155  |                                                                                      | C | -0.04023 | -0.50882 | 0.55610  |
|                                                                                     | C | -1.20185 | -1.77627 | -0.79598 |                                                                                      | C | -0.08231 | -2.15488 | -1.26134 |
|                                                                                     | C | 0.01269  | 0.16952  | -1.53100 |                                                                                      | C | -0.07448 | 0.15459  | -1.80984 |
|                                                                                     | C | 0.21600  | 0.54597  | -0.21348 |                                                                                      | C | -0.00985 | 0.46644  | -0.46734 |
|                                                                                     | C | -1.00351 | -1.41537 | 0.54012  |                                                                                      | C | -0.00048 | -1.87305 | 0.10977  |
|                                                                                     | H | -1.76511 | -2.67582 | -1.01838 |                                                                                      | H | -0.06612 | -3.19416 | -1.56938 |
|                                                                                     | H | 0.77053  | 1.44524  | 0.02637  |                                                                                      | H | 0.12829  | 1.49861  | -0.21712 |
|                                                                                     | C | -0.03550 | 0.18648  | 2.23439  |                                                                                      | C | -0.06112 | -0.07365 | 1.99617  |
|                                                                                     | C | 0.42467  | 1.06168  | 4.85486  |                                                                                      | C | 0.18112  | 0.55338  | 4.78748  |
|                                                                                     | C | 0.83204  | -0.53635 | 3.07702  |                                                                                      | C | 0.01972  | 1.28074  | 2.45871  |
|                                                                                     | C | -0.63934 | 1.34423  | 2.72559  |                                                                                      | C | -0.18288 | -1.02739 | 3.02851  |
|                                                                                     | C | -0.42375 | 1.78917  | 4.02499  |                                                                                      | C | -0.06123 | -0.75001 | 4.38011  |
|                                                                                     | C | 1.04633  | -0.08590 | 4.38531  |                                                                                      | C | 0.19167  | 1.54442  | 3.82569  |
|                                                                                     | H | -1.29771 | 1.89592  | 2.06615  |                                                                                      | H | -0.40031 | -2.04230 | 2.77715  |
|                                                                                     | H | -0.91016 | 2.68618  | 4.38351  |                                                                                      | H | -0.15662 | -1.55198 | 5.09975  |
|                                                                                     | H | 1.71296  | -0.64671 | 5.03030  |                                                                                      | H | 0.29812  | 2.57978  | 4.13052  |
|                                                                                     | H | 0.60743  | 1.38915  | 5.87036  |                                                                                      | H | 0.31204  | 0.80419  | 5.83193  |
|                                                                                     | C | 0.42645  | 0.89296  | -2.79836 |                                                                                      | C | -0.01414 | 1.09837  | -2.99549 |
|                                                                                     | C | -0.80291 | -1.18183 | -3.31567 |                                                                                      | C | -0.21430 | -1.25303 | -3.72523 |
|                                                                                     | H | -0.66129 | -2.21743 | -3.63006 |                                                                                      | H | 0.76135  | -1.54220 | -4.13014 |
|                                                                                     | H | -1.79341 | -0.87146 | -3.66487 |                                                                                      | H | -0.94062 | -1.98413 | -4.08520 |
|                                                                                     | C | 0.29351  | -0.23696 | -3.85400 |                                                                                      | C | -0.57499 | 0.19578  | -4.12774 |
|                                                                                     | H | 0.07432  | 0.15517  | -4.84855 |                                                                                      | H | -1.66278 | 0.29761  | -4.15251 |
|                                                                                     | H | 1.23919  | -0.78229 | -3.90654 |                                                                                      | H | -0.18702 | 0.47887  | -5.10767 |
|                                                                                     | C | -0.57786 | 2.02053  | -3.09153 |                                                                                      | C | -0.83525 | 2.37115  | -2.80084 |
|                                                                                     | H | -0.56749 | 2.75915  | -2.28713 |                                                                                      | H | -0.43511 | 2.96523  | -1.97504 |
|                                                                                     | H | -1.59223 | 1.62460  | -3.17561 |                                                                                      | H | -1.87688 | 2.12816  | -2.57991 |
|                                                                                     | H | -0.32160 | 2.52289  | -4.02816 |                                                                                      | H | -0.80574 | 2.98836  | -3.70257 |
|                                                                                     | C | 1.84028  | 1.46673  | -2.73427 |                                                                                      | C | 1.45206  | 1.46609  | -3.27874 |
|                                                                                     | H | 2.56589  | 0.68157  | -2.51140 |                                                                                      | H | 2.04886  | 0.56904  | -3.45713 |
|                                                                                     | H | 1.91392  | 2.23314  | -1.95890 |                                                                                      | H | 1.88351  | 1.99610  | -2.42683 |
|                                                                                     | H | 2.10842  | 1.92698  | -3.68883 |                                                                                      | H | 1.51914  | 2.10974  | -4.16007 |
|                                                                                     | C | -1.58562 | -2.26037 | 1.64307  |                                                                                      | C | 0.21456  | -3.10983 | 0.96242  |
|                                                                                     | H | -0.79886 | -2.74453 | 2.22617  |                                                                                      | H | 1.00998  | -2.96907 | 1.69500  |
|                                                                                     | H | -2.24041 | -3.03026 | 1.23270  |                                                                                      | H | 0.50530  | -3.94032 | 0.31824  |
|                                                                                     | H | -2.16170 | -1.64583 | 2.33857  |                                                                                      | H | -0.68585 | -3.42673 | 1.49658  |
|                                                                                     | N | 1.44980  | -1.70413 | 2.63537  |                                                                                      | N | -0.05386 | 2.42125  | 1.63230  |
|                                                                                     | H | 1.51827  | -1.80213 | 1.63419  |                                                                                      | H | -0.82866 | 2.40324  | 0.98580  |
|                                                                                     | H | 2.30145  | -1.94715 | 3.11422  |                                                                                      | H | -0.09632 | 3.26998  | 2.17783  |
|  | C | 0.59756  | 2.61857  | -1.55725 |  | C | -0.09981 | -1.21195 | -2.53554 |
|                                                                                     | C | 0.33884  | 1.53008  | 0.99904  |                                                                                      | C | -0.04454 | -0.88434 | 0.29970  |
|                                                                                     | C | -0.12952 | 1.45333  | -1.37072 |                                                                                      | C | -0.09438 | -2.30855 | -1.69582 |
|                                                                                     | C | 1.18376  | 3.25626  | -0.46771 |                                                                                      | C | -0.01000 | 0.04821  | -1.97113 |
|                                                                                     | C | 1.05400  | 2.71799  | 0.80061  |                                                                                      | C | 0.02225  | 0.20075  | -0.60207 |
|                                                                                     | C | -0.27241 | 0.89339  | -0.09742 |                                                                                      | C | -0.04760 | -2.19028 | -0.29824 |
|                                                                                     | H | -0.61567 | 0.97076  | -2.21155 |                                                                                      | H | -0.11158 | -3.30454 | -2.12325 |
|                                                                                     | H | 1.51004  | 3.20295  | 1.65550  |                                                                                      | H | 0.12875  | 1.18971  | -0.20088 |
|                                                                                     | C | 0.20709  | 1.00337  | 2.38311  |                                                                                      | C | -0.04398 | -0.60296 | 1.78268  |
|                                                                                     | C | -0.25266 | 0.08990  | 4.99281  |                                                                                      | C | 0.30163  | -0.29746 | 4.61662  |
|                                                                                     | C | 0.68397  | -0.27028 | 2.77371  |                                                                                      | C | 0.09035  | 0.69421  | 2.39124  |
|                                                                                     | C | -0.44145 | 1.79884  | 3.32815  |                                                                                      | C | -0.15019 | -1.66324 | 2.70293  |
|                                                                                     | C | -0.67879 | 1.35874  | 4.62590  |                                                                                      | C | 0.01959  | -1.53807 | 4.07432  |
|                                                                                     | C | 0.42719  | -0.70852 | 4.08011  |                                                                                      | C | 0.30458  | 0.79950  | 3.76994  |
|                                                                                     | H | -0.79803 | 2.77184  | 3.01469  |                                                                                      | H | -0.37922 | -2.64421 | 2.35077  |
|                                                                                     | H | -1.20215 | 1.99207  | 5.32973  |                                                                                      | H | -0.06311 | -2.41627 | 4.70117  |
|                                                                                     | H | 0.77863  | -1.67959 | 4.39600  |                                                                                      | H | 0.43723  | 1.78107  | 4.19946  |
|                                                                                     | H | -0.43284 | -0.28093 | 5.99385  |                                                                                      | H | 0.46781  | -0.16889 | 5.67832  |
|                                                                                     | C | 1.95356  | 4.48900  | -0.90089 |                                                                                      | C | 0.08221  | 1.12463  | -3.03504 |
|                                                                                     | C | 0.88958  | 3.37696  | -2.82895 |                                                                                      | C | -0.12638 | -1.12305 | -4.04037 |
|                                                                                     | H | 1.69624  | 2.88848  | -3.38604 |                                                                                      | H | 0.85599  | -1.37569 | -4.45357 |
|                                                                                     | H | 0.02960  | 3.44011  | -3.49817 |                                                                                      | H | -0.85125 | -1.79692 | -4.50100 |
|                                                                                     | C | 1.34009  | 4.75679  | -2.30120 |                                                                                      | C | -0.46091 | 0.36826  | -4.27800 |
|                                                                                     | H | 0.46206  | 5.39658  | -2.18329 |                                                                                      | H | -1.54664 | 0.48721  | -4.31508 |
|                                                                                     | H | 2.04140  | 5.26457  | -2.96566 |                                                                                      | H | -0.04680 | 0.75806  | -5.20948 |
|                                                                                     | C | 1.78182  | 5.67394  | 0.04692  |                                                                                      | C | -0.73520 | 2.37135  | -2.70368 |
|                                                                                     | H | 2.18929  | 5.44363  | 1.03437  |                                                                                      | H | -0.35500 | 2.85046  | -1.79800 |
|                                                                                     | H | 0.72558  | 5.92622  | 0.16136  |                                                                                      | H | -1.78342 | 2.11287  | -2.53950 |
|                                                                                     | H | 2.30907  | 6.55050  | -0.33861 |                                                                                      | H | -0.67800 | 3.09636  | -3.51980 |
|                                                                                     | C | 3.44599  | 4.13895  | -1.02848 |                                                                                      | C | 1.55584  | 1.51143  | -3.24282 |
|                                                                                     | H | 3.59238  | 3.31495  | -1.73031 |                                                                                      | H | 2.15155  | 0.63705  | -3.51396 |
|                                                                                     | H | 3.85094  | 3.83656  | -0.06017 |                                                                                      | H | 1.97138  | 1.93277  | -2.32481 |
|                                                                                     | H | 4.01023  | 5.00459  | -1.38590 |                                                                                      | H | 1.64614  | 2.25470  | -4.03977 |
|                                                                                     | C | -1.09974 | -0.35308 | 0.07098  |                                                                                      | C | 0.06325  | -3.52883 | 0.40767  |
|                                                                                     | H | -0.45680 | -1.23276 | 0.14325  |                                                                                      | H | 0.88477  | -3.54788 | 1.12543  |
|                                                                                     | H | -1.77764 | -0.48042 | -0.77453 |                                                                                      | H | 0.25751  | -4.30838 | -0.32949 |
|                                                                                     | H | -1.68723 | -0.31445 | 0.99004  |                                                                                      | H | -0.85287 | -3.81369 | 0.93270  |

|                                                                                                                                                                                                                        |                                                                                                                                                                                                                                                                                                                                                                                                                                                                                                                                                                                                                                                                                                                                                                                                                                                                                                                                                                                                                                                                                                                                                                                                                                                                                    |                                                                                                                                                                                                                         |                                                                                                                                                                                                                                                                                                                                                                                                                                                                                                                                                                                                                                                                                                                                                                                                                                                                                                                                                                                                                                                                                                                                                                                                                                                                  |
|------------------------------------------------------------------------------------------------------------------------------------------------------------------------------------------------------------------------|------------------------------------------------------------------------------------------------------------------------------------------------------------------------------------------------------------------------------------------------------------------------------------------------------------------------------------------------------------------------------------------------------------------------------------------------------------------------------------------------------------------------------------------------------------------------------------------------------------------------------------------------------------------------------------------------------------------------------------------------------------------------------------------------------------------------------------------------------------------------------------------------------------------------------------------------------------------------------------------------------------------------------------------------------------------------------------------------------------------------------------------------------------------------------------------------------------------------------------------------------------------------------------|-------------------------------------------------------------------------------------------------------------------------------------------------------------------------------------------------------------------------|------------------------------------------------------------------------------------------------------------------------------------------------------------------------------------------------------------------------------------------------------------------------------------------------------------------------------------------------------------------------------------------------------------------------------------------------------------------------------------------------------------------------------------------------------------------------------------------------------------------------------------------------------------------------------------------------------------------------------------------------------------------------------------------------------------------------------------------------------------------------------------------------------------------------------------------------------------------------------------------------------------------------------------------------------------------------------------------------------------------------------------------------------------------------------------------------------------------------------------------------------------------|
|                                                                                                                                                                                                                        | N 1.37894 -1.08327 1.85469<br>C 2.63106 -0.55498 1.32385<br>H 2.90579 -1.11900 0.42976<br>H 3.44715 -0.65055 2.05792<br>H 2.52705 0.49017 1.05027<br>C 1.49070 -2.49344 2.16865<br>H 1.84318 -3.01990 1.27963<br>H 0.51652 -2.89336 2.45106<br>H 2.20169 -2.69807 2.98597                                                                                                                                                                                                                                                                                                                                                                                                                                                                                                                                                                                                                                                                                                                                                                                                                                                                                                                                                                                                          |                                                                                                                                                                                                                         | N -0.05121 1.90622 1.65892<br>C -1.43565 2.18576 1.28654<br>H -1.88892 1.30117 0.84321<br>H -1.45729 2.99038 0.54762<br>H -2.03042 2.49093 2.16076<br>C 0.61188 3.09325 2.16347<br>H 1.64057 2.85810 2.43496<br>H 0.11024 3.53656 3.03914<br>H 0.61824 3.84627 1.37210                                                                                                                                                                                                                                                                                                                                                                                                                                                                                                                                                                                                                                                                                                                                                                                                                                                                                                                                                                                           |
| 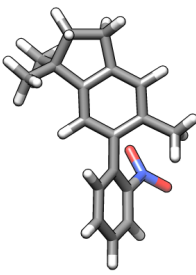 <p><b>4n</b><br/>                     -902.3318827<br/>                     -902.1900026<br/>                     -903.0136423</p>   | C 0.18609 -0.23328 -0.46378<br>C -1.53764 -2.24310 0.39493<br>C -0.66119 -0.00602 0.60794<br>C 0.17035 -1.46173 -1.11963<br>C -0.69011 -2.45828 -0.69906<br>C -1.53116 -1.00334 1.05757<br>H -0.66798 0.95669 1.10667<br>H -0.70927 -3.41788 -1.20088<br>C -2.47340 -3.33442 0.76401<br>C -4.37022 -5.35717 1.33795<br>C -2.57768 -3.92144 2.03063<br>C -3.35725 -3.81318 -0.21094<br>C -4.28349 -4.81137 0.06057<br>C -3.51665 -4.90179 2.33070<br>H -3.31450 -3.36707 -1.19524<br>H -4.94654 -5.15389 -0.72297<br>H -3.55341 -5.30140 3.33328<br>H -5.09322 -6.12994 1.56009<br>C 1.20308 -1.50584 -2.22889<br>C 1.20770 0.68245 -1.09110<br>H 0.85830 1.71169 -1.18957<br>H 2.11637 0.70697 -0.48061<br>C 1.47501 0.00569 -2.45329<br>H 2.48097 0.18817 -2.83465<br>H 0.76045 0.38695 -3.18703<br>C 2.47130 -2.20744 -1.71351<br>H 2.25240 -3.24253 -1.44295<br>H 2.86178 -1.70230 -0.82771<br>H 3.24506 -2.20516 -2.48580<br>C 0.70507 -2.20270 -3.49310<br>H -0.20543 -1.72683 -3.86354<br>H 0.48888 -3.25583 -3.29677<br>H 1.46477 -2.15704 -4.27754<br>C -2.43273 -0.70754 2.22888<br>H -1.95196 -0.97432 3.17379<br>H -3.37260 -1.25791 2.17276<br>H -2.66129 0.35826 2.27049<br>N -1.64922 -3.55930 3.11936<br>O -2.10391 -3.52788 4.25490<br>O -0.48691 -3.33476 2.82898 |  <p><b>4n</b><br/>                     -902.3082671<br/>                     -902.1667832<br/>                     -902.9907216</p>   | C -0.01451 -1.31605 -2.44885<br>C 0.01179 -0.88281 0.36646<br>C 0.00524 -2.38042 -1.56993<br>C -0.02745 -0.03160 -1.93306<br>C -0.01279 0.17081 -0.57081<br>C 0.01416 -2.20887 -0.17742<br>H 0.00428 -3.39110 -1.96038<br>H -0.03056 1.19505 -0.26715<br>C 0.02647 -0.54786 1.83398<br>C 0.03450 -0.00258 4.67787<br>C 0.01443 0.75441 2.39208<br>C 0.05437 -1.54715 2.83002<br>C 0.05890 -1.30021 4.19491<br>C 0.01358 1.02652 3.75345<br>H 0.07586 -2.57427 2.54537<br>H 0.08135 -2.14047 4.87613<br>H -0.00082 2.05864 4.07672<br>H 0.03468 0.21015 5.73778<br>C -0.01256 1.01054 -3.03323<br>C -0.01739 -1.28325 -3.95528<br>H 0.99222 -1.46721 -4.33744<br>H -0.67223 -2.03382 -4.40139<br>C -0.46892 0.16543 -4.25428<br>H -1.55963 0.19278 -4.31337<br>H -0.06997 0.55331 -5.19265<br>C -0.93893 2.19286 -2.75666<br>H -0.61897 2.73991 -1.86671<br>H -1.96402 1.85198 -2.59814<br>H -0.92922 2.88765 -3.60019<br>C 1.42729 1.51313 -3.23310<br>H 2.10119 0.68443 -3.46231<br>H 1.78811 2.00490 -2.32743<br>H 1.46529 2.23015 -4.05724<br>C 0.01280 -3.51754 0.58742<br>H 0.90985 -3.64653 1.19774<br>H -0.01169 -4.34773 -0.11791<br>H -0.86190 -3.62282 1.23321<br>N 0.01349 2.02285 1.62149<br>O -1.06827 2.53202 1.38389<br>O 1.09794 2.50206 1.33753 |
|  <p><b>4o</b><br/>                     -812.3439256<br/>                     -812.2125694<br/>                     -812.9774610</p> | C -0.35728 -0.08944 1.63442<br>C -0.20206 0.35149 4.38364<br>C -0.25094 -1.16481 2.50239<br>C -0.39732 1.20908 2.13367<br>C -0.32174 1.42913 3.49809<br>C -0.17212 -0.96341 3.88338<br>H -0.24655 -2.17961 2.11973<br>H -0.35147 2.43562 3.89764<br>C -0.16814 0.63966 5.84066<br>C -0.16820 1.23304 8.58337<br>C 0.93868 0.30776 6.64512<br>C -1.24546 1.28691 6.44244<br>C -1.25908 1.58565 7.80244<br>C 0.93117 0.59833 8.01007<br>H -2.09362 1.54633 5.82190<br>H -2.11403 2.08116 8.24235<br>H 1.77857 0.34353 8.62851<br>H -0.15982 1.45141 9.64341<br>C -0.47880 2.22685 1.01211<br>C -0.43937 -0.07534 0.12757<br>H 0.55518 -0.21917 -0.30817<br>H -1.08311 -0.85968 -0.27488<br>C -0.97043 1.34470 -0.16653<br>H -2.06309 1.32472 -0.15849<br>H -0.64652 1.73455 -1.13314<br>C -1.43105 3.38266 1.31130<br>H -1.07920 3.96396 2.16712<br>H -2.43198 3.00911 1.53752<br>H -1.49656 4.05506 0.45190<br>C 0.92762 2.77641 0.71871<br>H 1.61568 1.96629 0.46743<br>H 1.32333 3.29807 1.59282<br>H 0.89404 3.47752 -0.11966                                                                                                                                                                                                                                                    |  <p><b>4o</b><br/>                     -812.3228123<br/>                     -812.1910039<br/>                     -812.9577035</p> | C -0.06627 -1.15274 -2.45478<br>C -0.02436 -0.79223 0.37813<br>C -0.04379 -2.23912 -1.60251<br>C -0.06621 0.11569 -1.90409<br>C -0.04260 0.28677 -0.53570<br>C -0.02532 -2.10481 -0.20622<br>H -0.04796 -3.23917 -0.20200<br>H -0.04525 1.28871 -0.15975<br>C -0.00995 -0.49490 1.85804<br>C 0.01879 -0.07246 4.70758<br>C -0.00883 0.81728 2.44233<br>C 0.00456 -1.53068 2.80949<br>C 0.01860 -1.35128 4.18652<br>C 0.00500 0.99859 3.82732<br>H 0.00488 -2.54416 2.48056<br>H 0.02899 -2.21854 4.83307<br>H 0.00564 1.99816 4.23108<br>H 0.02948 0.10439 5.77504<br>C -0.04580 1.18416 -2.98075<br>C -0.07612 -1.08359 -3.96044<br>H 0.92883 -1.26610 -4.35610<br>H -0.74127 -1.81541 -4.42272<br>C -0.51704 0.37553 -4.22030<br>H -1.60810 0.41310 -4.27044<br>H -0.12195 0.78455 -5.15182<br>C -0.95877 2.36927 -2.67451<br>H -0.62592 2.88905 -1.77264<br>H -1.98597 2.03427 -2.51661<br>H -0.94771 3.08472 -3.50102<br>C 1.39659 1.67889 -3.17994<br>H 2.05949 0.84916 -3.43523<br>H 1.77010 2.14056 -2.26327<br>H 1.43811 2.41774 -3.98499                                                                                                                                                                                                                |

|                                                                                                                                                                                                                        |                                                                                                                                                                                                                                                                                                                                                                                                                                                                                                                                                                                                                                                                                                                                                                                                                                                                                                                                                                                                                                                                                                                                                                                                                                                                                                                                                                                                                                                                                                                     |                                                                                                                                                                                                                         |                                                                                                                                                                                                                                                                                                                                                                                                                                                                                                                                                                                                                                                                                                                                                                                                                                                                                                                                                                                                                                                                                                                                                                                                                                                                                                                                                                                                                                                                                                                          |
|------------------------------------------------------------------------------------------------------------------------------------------------------------------------------------------------------------------------|---------------------------------------------------------------------------------------------------------------------------------------------------------------------------------------------------------------------------------------------------------------------------------------------------------------------------------------------------------------------------------------------------------------------------------------------------------------------------------------------------------------------------------------------------------------------------------------------------------------------------------------------------------------------------------------------------------------------------------------------------------------------------------------------------------------------------------------------------------------------------------------------------------------------------------------------------------------------------------------------------------------------------------------------------------------------------------------------------------------------------------------------------------------------------------------------------------------------------------------------------------------------------------------------------------------------------------------------------------------------------------------------------------------------------------------------------------------------------------------------------------------------|-------------------------------------------------------------------------------------------------------------------------------------------------------------------------------------------------------------------------|--------------------------------------------------------------------------------------------------------------------------------------------------------------------------------------------------------------------------------------------------------------------------------------------------------------------------------------------------------------------------------------------------------------------------------------------------------------------------------------------------------------------------------------------------------------------------------------------------------------------------------------------------------------------------------------------------------------------------------------------------------------------------------------------------------------------------------------------------------------------------------------------------------------------------------------------------------------------------------------------------------------------------------------------------------------------------------------------------------------------------------------------------------------------------------------------------------------------------------------------------------------------------------------------------------------------------------------------------------------------------------------------------------------------------------------------------------------------------------------------------------------------------|
|                                                                                                                                                                                                                        | C -0.08717 -2.15560 4.79963<br>H 0.94626 -2.33574 5.10409<br>H -0.45975 -3.05128 4.30014<br>H -0.66636 -1.99687 5.71113<br>O 1.99325 -0.27425 6.00996<br>C 3.12686 -0.63368 6.77978<br>H 2.86340 -1.35899 7.55671<br>H 3.57911 0.24477 7.25126<br>H 3.83399 -1.08069 6.08416                                                                                                                                                                                                                                                                                                                                                                                                                                                                                                                                                                                                                                                                                                                                                                                                                                                                                                                                                                                                                                                                                                                                                                                                                                        |                                                                                                                                                                                                                         | C -0.01312 -3.43835 0.51646<br>H 0.87913 -3.57234 1.13251<br>H -0.01754 -4.24615 -0.21537<br>H -0.89134 -3.57924 1.15093<br>O -0.02091 1.91741 1.63448<br>C -0.03083 3.21727 2.19654<br>H 0.86497 3.39789 2.79845<br>H -0.91904 3.37661 2.81538<br>H -0.04708 3.90253 1.35105                                                                                                                                                                                                                                                                                                                                                                                                                                                                                                                                                                                                                                                                                                                                                                                                                                                                                                                                                                                                                                                                                                                                                                                                                                            |
| 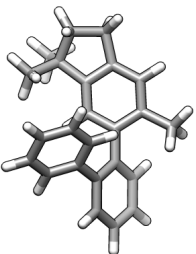 <p><b>4p</b><br/>                     -928.8339249<br/>                     -928.6744906<br/>                     -929.5759309</p>   | C -1.04626 -1.37243 -1.41614<br>C -0.63388 -0.84112 1.28984<br>C -1.80491 -2.02836 -0.46040<br>C -0.08250 -0.44574 -1.02584<br>C 0.11719 -0.17665 0.31358<br>C -1.60955 -1.77639 0.90239<br>H -2.54107 -2.76747 -0.75669<br>H 0.88316 0.52111 0.62604<br>C -0.33867 -0.56248 2.72014<br>C 0.16638 0.12309 5.39501<br>C 0.95678 -0.72093 3.25442<br>C -1.35344 -0.07253 3.54633<br>C -1.11374 0.26868 4.87049<br>C 1.18502 -0.36629 4.58922<br>H -2.34183 0.05987 3.12703<br>H -1.91808 0.65117 5.48540<br>H 2.17770 -0.50171 4.99864<br>H 0.36926 0.38176 6.42614<br>C 0.63243 0.14711 -2.22336<br>C -1.06865 -1.49958 -2.91962<br>H -1.19274 -2.52859 -3.26188<br>H -1.89710 -0.91793 -3.33791<br>C 0.29211 -0.89164 -3.32593<br>H 0.28428 -0.44506 -4.32173<br>H 1.05062 -1.67816 -3.31323<br>C 0.01892 1.51443 -2.56702<br>H 0.15443 2.21238 -1.73798<br>H -1.05197 1.42221 -2.76138<br>H 0.49887 1.93291 -3.45575<br>C 2.13723 0.29298 -2.00311<br>H 2.58068 -0.66314 -1.71810<br>H 2.34459 1.01261 -1.20758<br>H 2.62333 0.64900 -2.91528<br>C -2.41467 -2.55141 1.91614<br>H -1.80188 -2.84890 2.76892<br>H -2.84036 -3.44628 1.45972<br>H -3.24091 -1.95721 2.31559<br>C 2.08788 -1.25850 2.45801<br>C 4.24607 -2.25088 0.96248<br>C 1.95180 -2.41820 1.68785<br>C 3.32729 -0.61221 2.47279<br>C 4.39679 -1.10016 1.72910<br>C 3.01945 -2.91080 0.94982<br>H 0.99866 -2.92707 1.66173<br>H 3.44323 0.29149 3.05729<br>H 5.34462 -0.57753 1.74447<br>H 2.89351 -3.81068 0.36163<br>H 5.07577 -2.63098 0.38075 |  <p><b>4p</b><br/>                     -928.8093751<br/>                     -928.6499102<br/>                     -929.5527741</p>   | C -0.06215 -1.98240 -2.35083<br>C -0.01570 -1.33455 0.42847<br>C -0.04352 -2.97606 -1.39166<br>C -0.10376 -0.66446 -1.93173<br>C -0.08224 -0.36074 -0.58836<br>C -0.03729 -2.69853 -0.01533<br>H -0.05413 -4.01413 -1.70303<br>H -0.12860 0.67621 -0.33444<br>C 0.04553 -0.87304 1.86599<br>C 0.01809 -0.15807 4.65055<br>C 0.01036 0.49264 2.29185<br>C 0.14249 -1.80984 2.91420<br>C 0.12965 -1.48110 4.26172<br>C -0.02632 0.80490 3.65542<br>H 0.24350 -2.84837 2.69310<br>H 0.20577 -2.27185 4.99701<br>H -0.06862 1.85106 3.93010<br>H -0.00973 0.12562 5.69428<br>C -0.12147 0.29497 -3.10472<br>C -0.05854 -2.06179 -3.85596<br>H 0.95665 -2.24889 -4.22214<br>H -0.69367 -2.85794 -4.24887<br>C -0.54343 -0.65027 -4.26340<br>H -1.63402 -0.65615 -4.33190<br>H -0.14705 -0.32201 -5.22568<br>C -1.09038 1.46030 -2.91355<br>H -0.79096 2.07921 -2.06505<br>H -2.10266 1.09299 -2.73116<br>H -1.10561 2.09279 -3.80529<br>C 1.29855 0.83822 -3.33649<br>H 2.00582 0.02191 -3.50042<br>H 1.63049 1.40892 -2.46651<br>H 1.31578 1.49433 -4.21102<br>C -0.10392 -3.94564 0.84514<br>H 0.81855 -4.12442 1.40401<br>H -0.25950 -4.81601 0.20744<br>H -0.93213 -3.91424 1.55544<br>C 0.07318 1.72254 1.44378<br>C 0.23167 4.09593 -0.03662<br>C 1.30480 2.18696 0.97443<br>C -1.07175 2.47888 1.19042<br>C -0.99467 3.65457 0.44930<br>C 1.38316 3.36047 0.23420<br>H 2.19692 1.60839 1.17557<br>H -2.02721 2.12954 1.55952<br>H -1.89373 4.22324 0.24947<br>H 2.34329 3.70268 -0.13022<br>H 0.29162 5.00712 -0.61718 |
|  <p><b>4q</b><br/>                     -1095.988885<br/>                     -1095.933315<br/>                     -1096.620153</p> | C -0.85104 -1.59272 -1.29591<br>C -0.39691 -0.14370 1.03753<br>C -1.06680 -2.18847 -0.06215<br>C -0.41459 -0.27290 -1.37070<br>C -0.18616 0.44953 -0.21087<br>C -0.84673 -1.47454 1.11901<br>H -1.42275 -3.21070 0.00029<br>H 0.15583 1.47640 -0.25545<br>C -0.16229 0.65810 2.26868<br>C 0.18374 2.21989 4.57416<br>C 0.97395 0.48725 3.07864<br>C -1.09795 1.62950 2.63343<br>C -0.93860 2.40700 3.77355<br>C 1.13420 1.27089 4.22595<br>H -1.96913 1.76184 2.00442<br>H -1.68216 3.14841 4.03407<br>H 2.01345 1.14038 4.84442<br>H 0.32563 2.81525 5.46671<br>C -0.20781 0.15708 -2.81019<br>C -1.00996 -2.17160 -2.68051<br>H -0.15151 -2.80540 -2.92656<br>H -1.90502 -2.78683 -2.78767<br>C -1.03884 -0.91030 -3.57094<br>H -2.06979 -0.55822 -3.65634<br>H -0.65702 -1.08535 -4.57808                                                                                                                                                                                                                                                                                                                                                                                                                                                                                                                                                                                                                                                                                                                        |  <p><b>4q</b><br/>                     -1095.959685<br/>                     -1095.903969<br/>                     -1096.593119</p> | C -0.03808 -1.28849 -2.36454<br>C -0.02938 -0.74440 0.44184<br>C -0.01437 -2.31587 -1.44166<br>C -0.06405 0.01258 -1.89899<br>C -0.05776 0.26181 -0.54282<br>C -0.01404 -2.09385 -0.05638<br>H -0.00491 -3.34039 -1.79435<br>H -0.08627 1.29600 -0.26560<br>C -0.02155 -0.33422 1.89449<br>C -0.01027 0.21725 4.72025<br>C -0.03643 1.00868 2.40293<br>C 0.00805 -1.32622 2.89730<br>C 0.01402 -1.08742 4.25985<br>C -0.03390 1.23624 3.78855<br>H 0.02986 -2.35199 2.61274<br>H 0.03743 -1.92398 4.94545<br>H -0.04958 2.25406 4.15409<br>H -0.00878 0.44885 5.77703<br>C -0.04975 1.01153 -3.03890<br>C -0.03103 -1.31609 -3.87139<br>H 0.98156 -1.50777 -4.24209<br>H -0.67895 -2.08712 -4.29228<br>C -0.49129 0.11636 -4.22935<br>H -1.58185 0.13270 -4.29583<br>H -0.08966 0.47139 -5.17975                                                                                                                                                                                                                                                                                                                                                                                                                                                                                                                                                                                                                                                                                                                         |

|                                                                                                                                                                                                                        |                                                                                                                                                                                                                                                                                                                                                                                                                                                                                                                                                                                                                                                                                                                                                                                                                                                                                                                                                                                                                                                                                                                                                                                                                                                                                                                                                                                                                                                                                                                                                                                                                                                                                                                                                                                                                                                                                                                                                                                                                                                                                                                                                                                                                                                                                                                                                                                                                                                                                                                                                                                                                                                                                                                    |                                                                                                                                                                                                                         |                                                                                                                                                                                                                                                                                                                                                                                                                                                                                                                                                                                                                                                                                                                                                                                                                                                                                                                                                                                                                                                                                                                                                                                                                                                                                                                                                                                                                                                                                                                                                                                                                                                                                                                                                                                                                                                                                                                                                                                                                                                                                                                                                                                                                                                                                                                                                                                                                                                                                                                                                                                                                                                                                                                |
|------------------------------------------------------------------------------------------------------------------------------------------------------------------------------------------------------------------------|--------------------------------------------------------------------------------------------------------------------------------------------------------------------------------------------------------------------------------------------------------------------------------------------------------------------------------------------------------------------------------------------------------------------------------------------------------------------------------------------------------------------------------------------------------------------------------------------------------------------------------------------------------------------------------------------------------------------------------------------------------------------------------------------------------------------------------------------------------------------------------------------------------------------------------------------------------------------------------------------------------------------------------------------------------------------------------------------------------------------------------------------------------------------------------------------------------------------------------------------------------------------------------------------------------------------------------------------------------------------------------------------------------------------------------------------------------------------------------------------------------------------------------------------------------------------------------------------------------------------------------------------------------------------------------------------------------------------------------------------------------------------------------------------------------------------------------------------------------------------------------------------------------------------------------------------------------------------------------------------------------------------------------------------------------------------------------------------------------------------------------------------------------------------------------------------------------------------------------------------------------------------------------------------------------------------------------------------------------------------------------------------------------------------------------------------------------------------------------------------------------------------------------------------------------------------------------------------------------------------------------------------------------------------------------------------------------------------|-------------------------------------------------------------------------------------------------------------------------------------------------------------------------------------------------------------------------|----------------------------------------------------------------------------------------------------------------------------------------------------------------------------------------------------------------------------------------------------------------------------------------------------------------------------------------------------------------------------------------------------------------------------------------------------------------------------------------------------------------------------------------------------------------------------------------------------------------------------------------------------------------------------------------------------------------------------------------------------------------------------------------------------------------------------------------------------------------------------------------------------------------------------------------------------------------------------------------------------------------------------------------------------------------------------------------------------------------------------------------------------------------------------------------------------------------------------------------------------------------------------------------------------------------------------------------------------------------------------------------------------------------------------------------------------------------------------------------------------------------------------------------------------------------------------------------------------------------------------------------------------------------------------------------------------------------------------------------------------------------------------------------------------------------------------------------------------------------------------------------------------------------------------------------------------------------------------------------------------------------------------------------------------------------------------------------------------------------------------------------------------------------------------------------------------------------------------------------------------------------------------------------------------------------------------------------------------------------------------------------------------------------------------------------------------------------------------------------------------------------------------------------------------------------------------------------------------------------------------------------------------------------------------------------------------------------|
|                                                                                                                                                                                                                        | <p>C -0.68771 1.57920 -3.09172<br/>                     H -0.10811 2.30604 -2.51747<br/>                     H -1.74081 1.69140 -2.82538<br/>                     H -0.56998 1.81757 -4.15188<br/>                     C 1.28269 0.03129 -3.16916<br/>                     H 1.63588 -0.98974 -3.00889<br/>                     H 1.88310 0.69963 -2.54823<br/>                     H 1.44321 0.29368 -4.21819<br/>                     C -1.10844 -2.11757 2.45544<br/>                     H -0.18677 -2.20591 3.03636<br/>                     H -1.53217 -3.11436 2.32770<br/>                     H -1.80130 -1.51721 3.04963<br/>                     S 2.26775 -0.67634 2.72443<br/>                     H 1.77686 -1.11381 1.55415</p>                                                                                                                                                                                                                                                                                                                                                                                                                                                                                                                                                                                                                                                                                                                                                                                                                                                                                                                                                                                                                                                                                                                                                                                                                                                                                                                                                                                                                                                                                                                                                                                                                                                                                                                                                                                                                                                                                                                                                                     |                                                                                                                                                                                                                         | <p>C -0.98772 2.19600 -2.81633<br/>                     H -0.67572 2.77972 -1.94707<br/>                     H -2.01047 1.85241 -2.64851<br/>                     H -0.98033 2.85665 -3.68714<br/>                     C 1.38653 1.51887 -3.25145<br/>                     H 2.06781 0.68735 -3.44530<br/>                     H 1.73936 2.04676 -2.36297<br/>                     H 1.42389 2.20460 -4.10210<br/>                     C -0.00857 -3.38280 0.74486<br/>                     H 0.88484 -3.48846 1.36484<br/>                     H -0.02064 -4.23190 0.06176<br/>                     H -0.88634 -3.48044 1.38768<br/>                     S -0.05216 2.51954 1.43069<br/>                     H -0.04471 3.35621 2.47989</p>                                                                                                                                                                                                                                                                                                                                                                                                                                                                                                                                                                                                                                                                                                                                                                                                                                                                                                                                                                                                                                                                                                                                                                                                                                                                                                                                                                                                                                                                                                                                                                                                                                                                                                                                                                                                                                                                                                                                                                   |
| 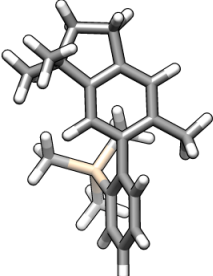 <p><b>4r</b><br/>                     -1106.456653<br/>                     -1106.358940<br/>                     -1107.172798</p>   | <p>C -2.08483 -1.25208 -1.06270<br/>                     C -1.07751 -0.01690 1.21978<br/>                     C -2.92372 -0.48820 -0.26458<br/>                     C -0.74545 -1.40979 -0.71978<br/>                     C -0.24526 -0.80282 0.42041<br/>                     C -2.43256 0.14024 0.88152<br/>                     H -3.96428 -0.35010 -0.53610<br/>                     H 0.79629 -0.91209 0.69389<br/>                     C -0.49821 0.69181 2.39362<br/>                     C 0.56442 1.94990 4.65081<br/>                     C 0.34203 1.81012 2.22058<br/>                     C -0.80152 0.23187 3.67650<br/>                     C -0.27269 0.85023 4.80250<br/>                     C 0.85839 2.41862 3.37521<br/>                     H -1.45340 -0.62621 3.78470<br/>                     H -0.51200 0.47570 5.78970<br/>                     H 1.49939 3.28578 3.27820<br/>                     H 0.98190 2.44300 5.51949<br/>                     C -0.02702 -2.31062 -1.70539<br/>                     C -2.39481 -2.01161 -2.32925<br/>                     H -2.89560 -2.95609 -2.09160<br/>                     H -3.04868 -1.46292 -3.00938<br/>                     C -0.99094 -2.26419 -2.92096<br/>                     H -0.71519 -1.41879 -3.55611<br/>                     H -0.93439 -3.17222 -3.52362<br/>                     C 1.37613 -1.82129 -2.05715<br/>                     H 2.02281 -1.82590 -1.17639<br/>                     H 1.34350 -0.80392 -2.45179<br/>                     H 1.82909 -2.47169 -2.80978<br/>                     C 0.04745 -3.73609 -1.13320<br/>                     H -0.95128 -4.11639 -0.90800<br/>                     H 0.63070 -3.74680 -0.20988<br/>                     H 0.52211 -4.40911 -1.85223<br/>                     C -3.33290 1.02786 1.70029<br/>                     H -3.44150 0.65851 2.72218<br/>                     H -4.32377 1.09390 1.24940<br/>                     H -2.91669 2.03580 1.77682<br/>                     Si 0.78450 2.55496 0.53418<br/>                     C 2.20850 1.61613 -0.26665<br/>                     H 2.55820 2.14691 -1.15780<br/>                     H 1.90909 0.61287 -0.57151<br/>                     H 3.05420 1.52480 0.42068<br/>                     C -0.68907 2.58374 -0.63499<br/>                     H -0.45401 3.20690 -1.50360<br/>                     H -1.57401 3.00660 -0.15230<br/>                     H -0.94861 1.58518 -0.98890<br/>                     C 1.35179 4.32872 0.83273<br/>                     H 1.56610 4.81630 -0.12270<br/>                     H 2.26338 4.37230 1.43458<br/>                     H 0.58483 4.91609 1.34458</p> |  <p><b>4r</b><br/>                     -1106.426630<br/>                     -1106.328572<br/>                     -1107.144459</p>   | <p>C -0.15350 -1.53465 -2.69973<br/>                     C -0.03413 -1.27100 0.13698<br/>                     C -0.16940 -2.64820 -1.88315<br/>                     C -0.02191 -0.28654 -2.11399<br/>                     C 0.04048 -0.17843 -0.74212<br/>                     C -0.09415 -2.56218 -0.48401<br/>                     H -0.22837 -3.63330 -2.33127<br/>                     H 0.16068 0.80451 -0.34605<br/>                     C 0.00621 -0.98781 1.61768<br/>                     C 0.36684 -0.71287 4.43767<br/>                     C 0.17122 0.32088 2.20152<br/>                     C -0.11066 -2.05859 2.52066<br/>                     C 0.06348 -1.94385 3.89273<br/>                     C 0.38397 0.38732 3.58961<br/>                     H -0.35824 -3.03310 2.16268<br/>                     H -0.03434 -2.82412 4.51537<br/>                     H 0.54988 1.34834 4.05312<br/>                     H 0.54544 -0.58986 5.49798<br/>                     C 0.09539 0.80430 -3.16086<br/>                     C -0.19743 -1.41580 -4.20206<br/>                     H 0.77197 -1.68665 -4.63362<br/>                     H -0.94645 -2.06170 -4.66377<br/>                     C -0.49449 0.08784 -4.40564<br/>                     H -1.57674 0.23867 -4.41736<br/>                     H -0.08774 0.48415 -5.33745<br/>                     C -0.66240 2.08075 -2.80399<br/>                     H -0.24791 2.54015 -1.90488<br/>                     H -1.71735 1.86785 -2.62172<br/>                     H -0.58910 2.80552 -3.61892<br/>                     C 1.58108 1.13152 -3.38960<br/>                     H 2.13678 0.23606 -3.67596<br/>                     H 2.03017 1.53256 -2.47887<br/>                     H 1.68653 1.87573 -4.18348<br/>                     C -0.03218 -3.91572 0.19684<br/>                     H 0.80768 -3.98927 0.88956<br/>                     H 0.09918 -4.69201 -0.55733<br/>                     H -0.94673 -4.15925 0.74467<br/>                     Si -0.07104 2.08891 1.50521<br/>                     C -1.73385 2.23644 0.62134<br/>                     H -1.90440 1.49381 -0.15539<br/>                     H -1.83051 3.22808 0.16930<br/>                     H -2.52828 2.13482 1.36666<br/>                     C -0.20350 3.32464 2.92967<br/>                     H -0.46068 4.29840 2.50135<br/>                     H 0.73211 3.44687 3.48067<br/>                     H -0.98698 3.05607 3.64183<br/>                     C 1.39034 2.74404 0.49291<br/>                     H 1.68986 2.14258 -0.36447<br/>                     H 2.25779 2.82665 1.15461<br/>                     H 1.15786 3.75103 0.13245</p> |
|  <p><b>5a</b><br/>                     -1433.410171<br/>                     -1434.278592<br/>                     -1433.765965</p> | <p>C -1.64849 0.38296 -3.36184<br/>                     C -1.05945 0.49838 -0.62131<br/>                     C -1.42012 -0.80392 -2.66645<br/>                     C -1.58147 1.61398 -2.72123<br/>                     C -1.28470 1.66075 -1.36209<br/>                     C -1.13363 -0.72267 -1.30498<br/>                     C -0.73713 0.52173 0.83266<br/>                     C -0.20055 0.58116 3.58581<br/>                     C 0.57403 0.52831 1.31387<br/>                     C -1.76859 0.55269 1.78056<br/>                     C -1.52601 0.58716 3.15253<br/>                     C 0.85073 0.55377 2.67787<br/>                     H -2.79951 0.56114 1.45151<br/>                     H -1.87362 0.30977 -4.41807<br/>                     H -0.02197 0.60454 4.65308<br/>                     H -0.95408 -1.64735 -0.77239<br/>                     I -1.14186 3.58390 -0.44751<br/>                     I 2.23145 0.54299 -0.03079</p>                                                                                                                                                                                                                                                                                                                                                                                                                                                                                                                                                                                                                                                                                                                                                                                                                                                                                                                                                                                                                                                                                                                                                                                                                                                                                                                                                                                                                                                                                                                                                                                                                                                                                                                                                    |  <p><b>5a</b><br/>                     -1433.372199<br/>                     -1434.240935<br/>                     -1433.731574</p> | <p>C -0.12524 -0.34527 -3.61838<br/>                     C -0.00635 -0.01315 -0.75885<br/>                     C -0.01043 -1.45954 -2.80302<br/>                     C -0.13476 0.91264 -3.04136<br/>                     C -0.06157 1.09766 -1.65678<br/>                     C 0.04620 -1.25327 -1.42997<br/>                     C 0.00697 0.01213 0.75872<br/>                     C 0.12583 0.34424 3.61826<br/>                     C -0.04557 1.25225 1.42984<br/>                     C 0.06219 -1.09868 1.65666<br/>                     C 0.13537 -0.91366 3.04123<br/>                     C 0.01103 1.45851 2.80289<br/>                     H -0.18513 -0.48387 -4.68996<br/>                     H 0.18570 0.48285 4.68983<br/>                     H 0.14302 -2.16000 -0.86818<br/>                     C 0.05597 -2.88793 -3.40888<br/>                     O -0.05528 -2.94091 -4.65648<br/>                     O 0.21433 -3.82027 -2.59167</p>                                                                                                                                                                                                                                                                                                                                                                                                                                                                                                                                                                                                                                                                                                                                                                                                                                                                                                                                                                                                                                                                                                                                                                                                                                                                                                                                                                                                                                                                                                                                                                                                                                                                                                                                              |

|                                                                                                                                                                                                                      |                                                                                                                                                                                                                                                                                                                                                                                                                                                                                                                                                                                                                                                                                                                                                                                                                                                                                                                                                                                                                                                                                                                                                                                                                                                                                                                                                                                                                                                                                                                                                                                                                  |                                                                                                                                                                                                                       |                                                                                                                                                                                                                                                                                                                                                                                                                                                                                                                                                                                                                                                                                                                                                                                                                                                                                                                                                                                                                                                                                                                                                                                                                                                                                                                                                                                                                                                                                                                                                                                                                        |
|----------------------------------------------------------------------------------------------------------------------------------------------------------------------------------------------------------------------|------------------------------------------------------------------------------------------------------------------------------------------------------------------------------------------------------------------------------------------------------------------------------------------------------------------------------------------------------------------------------------------------------------------------------------------------------------------------------------------------------------------------------------------------------------------------------------------------------------------------------------------------------------------------------------------------------------------------------------------------------------------------------------------------------------------------------------------------------------------------------------------------------------------------------------------------------------------------------------------------------------------------------------------------------------------------------------------------------------------------------------------------------------------------------------------------------------------------------------------------------------------------------------------------------------------------------------------------------------------------------------------------------------------------------------------------------------------------------------------------------------------------------------------------------------------------------------------------------------------|-----------------------------------------------------------------------------------------------------------------------------------------------------------------------------------------------------------------------|------------------------------------------------------------------------------------------------------------------------------------------------------------------------------------------------------------------------------------------------------------------------------------------------------------------------------------------------------------------------------------------------------------------------------------------------------------------------------------------------------------------------------------------------------------------------------------------------------------------------------------------------------------------------------------------------------------------------------------------------------------------------------------------------------------------------------------------------------------------------------------------------------------------------------------------------------------------------------------------------------------------------------------------------------------------------------------------------------------------------------------------------------------------------------------------------------------------------------------------------------------------------------------------------------------------------------------------------------------------------------------------------------------------------------------------------------------------------------------------------------------------------------------------------------------------------------------------------------------------------|
|                                                                                                                                                                                                                      | <p>C -1.47096 -2.17055 -3.40633<br/>                     O -1.22299 -3.17438 -2.70583<br/>                     O -1.75059 -2.10592 -4.62660<br/>                     C -2.68925 0.64759 4.18238<br/>                     O -2.33612 0.66159 5.38519<br/>                     O -3.83969 0.68100 3.69744<br/>                     H -1.75284 2.53032 -3.27085<br/>                     H 1.87621 0.55710 3.02337</p>                                                                                                                                                                                                                                                                                                                                                                                                                                                                                                                                                                                                                                                                                                                                                                                                                                                                                                                                                                                                                                                                                                                                                                                              |                                                                                                                                                                                                                       | <p>I 0.03776 3.22949 -1.27159<br/>                     I -0.03712 -3.23051 1.27146<br/>                     H -0.14238 2.15898 0.86805<br/>                     C -0.05537 2.88691 3.40877<br/>                     O 0.05578 2.93987 4.65637<br/>                     O -0.21363 3.81926 2.59155<br/>                     H 0.18873 -1.78146 3.68361<br/>                     H -0.18813 1.78043 -3.68374</p>                                                                                                                                                                                                                                                                                                                                                                                                                                                                                                                                                                                                                                                                                                                                                                                                                                                                                                                                                                                                                                                                                                                                                                                                         |
| 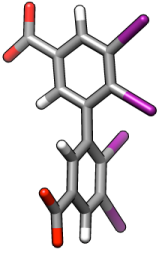 <p><b>5b</b><br/>                     -2027.629814<br/>                     -2029.525752<br/>                     -2027.765952</p> | <p>C -1.63016 0.37986 -3.35506<br/>                     C -1.03997 0.52516 -0.62763<br/>                     C -1.44805 -0.79698 -2.63475<br/>                     C -1.52474 1.61481 -2.72924<br/>                     C -1.22943 1.70609 -1.36496<br/>                     C -1.16027 -0.70407 -1.27763<br/>                     C -0.71082 0.54269 0.82820<br/>                     C -0.20691 0.59780 3.57621<br/>                     C 0.61397 0.58463 1.29451<br/>                     C -1.75340 0.52080 1.75582<br/>                     C -1.52329 0.55305 3.12665<br/>                     C 0.84790 0.61131 2.67342<br/>                     H -2.77992 0.49257 1.41611<br/>                     H -1.85311 0.28591 -4.40855<br/>                     H -0.04953 0.62211 4.64534<br/>                     H -1.01424 -1.62392 -0.72765<br/>                     I -1.84094 3.31393 -3.99711<br/>                     I -1.02212 3.56330 -0.35002<br/>                     I 2.17958 0.63503 -0.14371<br/>                     I 2.80277 0.67730 3.55021<br/>                     C -1.55326 -2.17418 -3.35829<br/>                     O -1.36012 -3.16869 -2.63057<br/>                     O -1.81377 -2.11346 -4.58003<br/>                     C -2.69545 0.55667 4.15484<br/>                     O -2.34803 0.58939 5.35586<br/>                     O -3.83726 0.53125 3.65329</p>                                                                                                                                                                                                            |  <p><b>5b</b><br/>                     -2027.580164<br/>                     -2029.477793<br/>                     -2027.721582</p> | <p>C 0.85065 -2.04107 -2.75280<br/>                     C -0.76345 -0.50773 -0.96918<br/>                     C 0.19420 -2.67026 -1.70822<br/>                     C 0.86398 -0.65468 -2.79016<br/>                     C 0.15739 0.13347 -1.86857<br/>                     C -0.58045 -1.89509 -0.85848<br/>                     C -1.83293 0.17576 -0.15096<br/>                     C -3.43895 1.71129 1.63773<br/>                     C -2.01565 1.56303 -0.26227<br/>                     C -2.75212 -0.46433 0.75099<br/>                     C -3.45558 0.32483 1.67402<br/>                     C -2.78474 2.33958 0.59127<br/>                     H 1.37882 -2.65355 -3.46879<br/>                     H -3.96270 2.32444 2.35635<br/>                     H -1.05501 -2.44448 -0.06792<br/>                     C 0.30759 -4.21026 -1.51684<br/>                     O -0.19121 -4.64878 -0.45933<br/>                     O 0.88980 -4.81965 -2.44022<br/>                     I 2.06856 0.12842 -4.39916<br/>                     I 0.88211 2.14202 -1.61736<br/>                     I -3.47916 -2.47220 0.50132<br/>                     I -4.65938 -0.45643 3.28448<br/>                     H -1.54365 2.11141 -1.05512<br/>                     C -2.89521 3.87994 0.40126<br/>                     O -3.46550 4.49110 1.33081<br/>                     O -2.40613 4.31681 -0.66153</p>                                                                                                                                                                                                             |
|  <p><b>6</b><br/>                     -1248.197974<br/>                     -1247.986680<br/>                     -1249.021207</p> | <p>C -0.67868 -1.00888 -3.72584<br/>                     C -0.11509 -0.26140 -1.06278<br/>                     C -0.89230 -1.91606 -2.69562<br/>                     C -0.14111 0.23432 -3.43788<br/>                     C 0.14793 0.62377 -2.12524<br/>                     C -0.59094 -1.54066 -1.39526<br/>                     C 0.15785 0.18170 0.33567<br/>                     C 0.91923 1.02655 2.86852<br/>                     C 1.48129 0.57396 0.60152<br/>                     C -0.81466 0.27097 1.35384<br/>                     C -0.40946 0.70911 2.61243<br/>                     C 1.87919 0.97863 1.85836<br/>                     H -0.91044 -1.28765 -4.74789<br/>                     H 0.07443 0.93483 -4.23571<br/>                     H 2.89955 1.26390 2.06177<br/>                     H -1.27819 -2.90668 -2.87845<br/>                     H -1.16218 0.80671 3.37859<br/>                     H 2.19275 0.57627 -0.21234<br/>                     C 0.77782 2.02219 -1.95985<br/>                     O 2.00834 2.04289 -2.20482<br/>                     O 0.00483 2.94748 -1.66412<br/>                     C -2.32697 -0.06587 1.19835<br/>                     O -2.62223 -0.89022 0.30647<br/>                     O -3.08094 0.51170 2.00848<br/>                     N -0.68897 -2.62147 -0.39058<br/>                     O 0.04838 -2.57256 0.58386<br/>                     O -1.42784 -3.56947 -0.62851<br/>                     N 1.32043 1.43307 4.20896<br/>                     O 2.50502 1.71769 4.41107<br/>                     O 0.47282 1.47794 5.09858</p> |  <p><b>6</b><br/>                     -1248.159299<br/>                     -1247.950882<br/>                     -1248.988222</p> | <p>C -0.60671 0.80017 -4.13792<br/>                     C -0.08849 0.24465 -1.37127<br/>                     C -0.60232 -0.50268 -3.67175<br/>                     C -0.23105 1.80819 -3.26952<br/>                     C 0.05732 1.55577 -1.92699<br/>                     C -0.29631 -0.77275 -2.33938<br/>                     C -0.15404 0.13803 0.12978<br/>                     C -0.20093 0.47828 2.93058<br/>                     C -0.65767 1.30634 0.75524<br/>                     C 0.17772 -0.94589 0.99092<br/>                     C 0.22189 -0.71630 2.37143<br/>                     C -0.69673 1.49320 2.11936<br/>                     H -0.84873 1.01045 -5.17382<br/>                     H 0.56185 -1.52059 3.00544<br/>                     H -0.15947 2.83444 -3.60614<br/>                     H -0.79180 -1.33652 -4.33128<br/>                     H -1.07984 2.40755 2.54366<br/>                     C 0.26192 -2.46065 0.70146<br/>                     O -0.81669 -2.87777 0.22091<br/>                     O 1.26328 -3.07961 1.09233<br/>                     H -1.03941 2.11229 0.15016<br/>                     C 0.64936 2.80762 -1.21135<br/>                     O 1.83319 2.67652 -0.86041<br/>                     O -0.10117 3.80954 -1.16415<br/>                     N 0.01939 -2.21750 -2.19194<br/>                     O -0.77175 -3.03834 -2.63409<br/>                     O 1.15419 -2.46706 -1.82538<br/>                     N -0.17457 0.65766 4.37583<br/>                     O 0.31335 -0.22606 5.07844<br/>                     O -0.64629 1.69484 4.84926</p> |
|  <p><b>7a</b><br/>                     -2761.006035<br/>                     -2761.298452</p>                                     | <p>C 0.02781 2.32353 0.86278<br/>                     C 1.11685 2.10649 0.01828<br/>                     C 1.51688 3.13121 -0.83688<br/>                     C 0.83869 4.34120 -0.84320<br/>                     C -0.24621 4.55289 -0.00082<br/>                     C -0.65003 3.53717 0.85444<br/>                     H 2.35932 2.97669 -1.49562<br/>                     H -0.76869 5.49858 -0.01239<br/>                     H -1.49119 3.68499 1.51638<br/>                     C 1.86251 0.82096 0.01087<br/>                     C 2.97424 0.62914 0.83371<br/>                     C 1.46907 -0.23274 -0.82722<br/>                     C 3.68291 -0.56569 0.82997<br/>                     C 2.17817 -1.43756 -0.83594<br/>                     C 3.28226 -1.59422 -0.00544<br/>                     H 4.53883 -0.68749 1.47743<br/>                     H 3.82430 -2.52879 -0.01839</p>                                                                                                                                                                                                                                                                                                                                                                                                                                                                                                                                                                                                                                                                                                              |  <p><b>7a</b><br/>                     -2760.937410<br/>                     -2761.231996</p>                                     | <p>C -0.72025 -2.66253 -2.12481<br/>                     C 0.15295 -0.50047 -0.44075<br/>                     C -0.37955 -2.88740 -0.80442<br/>                     C -0.35631 -1.44115 -2.68943<br/>                     C 0.14441 -0.41119 -1.88496<br/>                     C 0.13816 -1.86215 -0.00867<br/>                     C 0.10892 0.74912 0.38623<br/>                     C 0.17477 3.39315 1.56398<br/>                     C -0.23048 1.93733 -0.31688<br/>                     C 0.21976 0.96137 1.79465<br/>                     C 0.33128 2.25229 2.33163<br/>                     C -0.19032 3.20447 0.23424<br/>                     H -1.13819 -3.44711 -2.74360<br/>                     H 0.25364 4.38259 1.99820<br/>                     H -0.56287 1.86784 -1.33864<br/>                     H 0.48322 2.33999 3.40136<br/>                     Cl 0.97400 0.87118 -2.74023</p>                                                                                                                                                                                                                                                                                                                                                                                                                                                                                                                                                                                                                                                                                                              |



|                                                                                                                                                 |                                                                                                                                                                                                                                                                                                                                                                                                                                                                                                                                                                                                                                                                                                                                                                                                                                                   |                                                                                                                                                 |                                                                                                                                                                                                                                                                                                                                                                                                                                                                                                                                                                                                                                                                                                                                                                                                                                                       |
|-------------------------------------------------------------------------------------------------------------------------------------------------|---------------------------------------------------------------------------------------------------------------------------------------------------------------------------------------------------------------------------------------------------------------------------------------------------------------------------------------------------------------------------------------------------------------------------------------------------------------------------------------------------------------------------------------------------------------------------------------------------------------------------------------------------------------------------------------------------------------------------------------------------------------------------------------------------------------------------------------------------|-------------------------------------------------------------------------------------------------------------------------------------------------|-------------------------------------------------------------------------------------------------------------------------------------------------------------------------------------------------------------------------------------------------------------------------------------------------------------------------------------------------------------------------------------------------------------------------------------------------------------------------------------------------------------------------------------------------------------------------------------------------------------------------------------------------------------------------------------------------------------------------------------------------------------------------------------------------------------------------------------------------------|
| -2761.735577                                                                                                                                    | Cl 3.49521 1.90036 1.90454<br>Cl 0.08335 -0.02061 -1.84747<br>Cl 1.71872 -2.75935 -1.86166<br>Cl -0.50381 1.06865 1.94793<br>Cl 1.35599 5.60949 -1.92159                                                                                                                                                                                                                                                                                                                                                                                                                                                                                                                                                                                                                                                                                          | -2761.672081                                                                                                                                    | Cl 0.98576 -2.45712 1.39066<br>Cl -0.00664 -0.22732 3.05097<br>Cl -0.61752 4.57596 -0.75834<br>Cl -0.48032 -1.27257 -4.41401<br>H -0.45454 -3.88137 -0.37889                                                                                                                                                                                                                                                                                                                                                                                                                                                                                                                                                                                                                                                                                          |
| 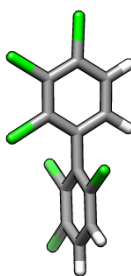<br><b>7b</b><br>-3220.560430<br>-3220.927857<br>-3221.362571  | C 0.01176 2.30846 0.85739<br>C 1.10067 2.09868 0.00955<br>C 1.49252 3.11862 -0.85090<br>C 0.81906 4.32730 -0.87618<br>C -0.26540 4.53418 -0.03229<br>C -0.68320 3.52729 0.84652<br>H 2.33649 2.95758 -1.50714<br>C 1.85109 0.81571 0.01192<br>C 2.96263 0.63370 0.83724<br>C 1.46816 -0.24182 -0.82621<br>C 3.68103 -0.55521 0.83605<br>C 2.18731 -1.44074 -0.83275<br>C 3.29083 -1.58764 0.00044<br>H 4.53620 -0.66961 1.48578<br>H 3.84048 -2.51776 -0.01050<br>Cl 3.46930 1.90994 1.90884<br>Cl 0.08120 -0.04258 -1.84751<br>Cl 1.74118 -2.76669 -1.85871<br>Cl -0.47287 1.03439 1.92911<br>H 1.12571 5.11710 -1.54612<br>Cl -2.02969 3.78189 1.89827<br>Cl -1.07987 6.06508 -0.09879                                                                                                                                                          | <br><b>7b</b><br>-3220.489400<br>-3220.859241<br>-3221.297079  | C -0.51685 -3.84098 -1.03258<br>C 0.09705 -1.10687 -0.37999<br>C -0.14572 -3.50119 0.26769<br>C -0.29734 -2.90691 -2.02718<br>C 0.10028 -1.60219 -1.72129<br>C 0.22997 -2.18918 0.57343<br>C -0.07451 0.29011 0.12915<br>C -0.14638 2.78383 1.55707<br>C -0.07191 1.54800 -0.55016<br>C -0.42237 0.40567 1.50000<br>C -0.45532 1.59106 2.20447<br>C -0.00130 2.76815 0.16734<br>H -0.84114 -4.84841 -1.26293<br>H -0.37392 -3.18866 -3.07100<br>Cl 0.83877 -0.79445 -3.07678<br>Cl 1.09887 -1.98756 2.08088<br>Cl -0.09878 -4.76501 1.45897<br>H -0.70136 -0.48413 2.04054<br>Cl -0.39470 1.74104 -2.23674<br>H -0.70947 1.59741 3.25762<br>Cl 0.18183 4.26808 -0.67406<br>Cl -0.06304 4.25150 2.46827                                                                                                                                                |
| <br><b>7c</b><br>-3220.564736<br>-3220.932354<br>-3221.366130 | C 0.08083 2.32112 0.84938<br>C 1.14594 2.12260 -0.02161<br>C 1.49441 3.15989 -0.88682<br>C 0.79731 4.35911 -0.88192<br>C -0.26670 4.54279 -0.00592<br>C -0.62961 3.51513 0.86903<br>C 1.87787 0.83007 -0.00123<br>C 2.95747 0.62804 0.86103<br>C 1.49968 -0.22232 -0.84811<br>C 3.64468 -0.57878 0.89290<br>C 2.18712 -1.43935 -0.82069<br>C 3.25629 -1.60779 0.05230<br>H 4.47683 -0.70831 1.56913<br>H 3.78221 -2.55152 0.06688<br>Cl 3.47690 1.90868 1.92100<br>Cl 0.16962 0.01240 -1.93518<br>Cl 1.74389 -2.76093 -1.85323<br>H 1.07760 5.15348 -1.55710<br>Cl -1.94581 3.68471 1.98491<br>Cl 2.81938 2.97030 -1.99788<br>H -0.20301 1.52966 1.52803<br>Cl -1.10880 6.05771 -0.03560                                                                                                                                                          | <br><b>7c</b><br>-3220.497137<br>-3220.867022<br>-3221.303692 | C -0.59629 -3.55062 -1.73320<br>C 0.12618 -1.06770 -0.47344<br>C -0.30333 -3.50096 -0.38342<br>C -0.25717 -2.44543 -2.51202<br>C 0.17080 -1.25807 -1.90726<br>C 0.14120 -2.31938 0.21501<br>C 0.01569 0.31270 0.09435<br>C -0.01116 3.13252 0.72770<br>C -0.32916 1.33344 -0.82978<br>C 0.06801 0.80007 1.43699<br>C 0.13694 2.16989 1.71473<br>C -0.34010 2.69033 -0.55850<br>H -0.95756 -4.45802 -2.20147<br>Cl 0.98086 -0.12704 -2.96987<br>Cl 0.94419 -2.59212 1.73515<br>Cl 0.10038 4.80830 1.13330<br>H 0.24527 2.48249 2.74574<br>H -0.63057 1.05728 -1.82617<br>Cl -0.77050 3.79887 -1.82156<br>Cl -0.18615 -0.12110 2.89467<br>Cl -0.31796 -2.61762 -4.23936<br>H -0.35927 -4.39655 0.22440                                                                                                                                                  |
| <br><b>8</b><br>-938.7683001<br>-938.7268268<br>-939.2696173 | C -1.15891 2.48965 -0.02895<br>C 0.14026 2.54978 -0.56664<br>C 0.83002 3.76062 -0.54977<br>C 0.24876 4.91047 -0.02808<br>C -1.04439 4.85806 0.48277<br>C -1.73873 3.65430 0.47981<br>H 1.83011 3.79960 -0.96402<br>H 0.79900 5.84232 -0.02680<br>H -1.50779 5.74821 0.88780<br>H -2.73886 3.60289 0.89079<br>C -1.91001 1.21019 -0.00554<br>C -3.19960 1.14273 -0.53838<br>C -1.33932 0.05258 0.55550<br>C -3.91157 -0.05072 -0.54259<br>H -3.63460 2.03650 -0.96711<br>C -2.05940 -1.14048 0.53719<br>C -3.33640 -1.19965 -0.00868<br>H -4.90670 -0.08481 -0.96650<br>H -1.61362 -2.02799 0.96949<br>H -3.88128 -2.13464 -0.01090<br>C 0.75263 1.33088 -1.19428<br>H 0.01599 0.81647 -1.81190<br>H 1.60338 1.60189 -1.81866<br>C 0.01125 0.11929 1.20833<br>H 0.08943 1.01980 1.81800<br>H 0.17762 -0.74891 1.84530<br>S 1.41443 0.11936 0.02014 | <br><b>8</b><br>-938.7393514<br>-938.6982208<br>-939.2424881 | C 0.13996 -1.67397 -3.33331<br>C 0.07836 -0.83035 -0.57800<br>C 0.06874 -2.60670 -2.31335<br>C 0.18656 -0.34079 -2.97578<br>C 0.17039 0.10893 -1.64609<br>C 0.03668 -2.18157 -0.99761<br>C -0.00462 -0.57344 0.92719<br>C -0.25651 -0.45590 3.79600<br>C -0.01070 0.66792 1.62748<br>C -0.11465 -1.71013 1.76351<br>C -0.23285 -1.67487 3.14111<br>C -0.14708 0.68437 3.02451<br>H 0.15640 -1.96890 -4.37405<br>H -0.35858 -0.38935 4.87097<br>H -0.31304 -2.60543 3.68743<br>H 0.24218 0.40191 -3.76160<br>H -0.11498 -2.69805 1.34442<br>H -0.02925 -2.97460 -0.27765<br>H 0.02961 -3.66692 -2.52603<br>H -0.16314 1.64629 3.52113<br>C 0.16081 2.05349 1.05452<br>H -0.11343 2.78576 1.81235<br>H 1.20900 2.24015 0.80589<br>C 0.30273 1.60936 -1.55018<br>H 1.32182 1.88877 -1.26972<br>H 0.12115 2.04333 -2.53222<br>S -0.81034 2.46270 -0.41232 |

<sup>a</sup> Except in the case of polychlorobiphenyls **7a** – **7c**, for which TPSS-D3-optimized structures were used. <sup>b</sup> In Hartrees; def2-TZVPP basis sets were used in all cases.
